# Supplementary material for: Reconstruction of ancestral chromosome architecture and gene repertoire reveals principles of genome evolution in a model yeast genus
Source: HighWire-hosted journal article supplement (doi:10.1101/gr.204420.116), 2016-05-31
Supplement: Supplemental_information.docx [file Supplemental_information.docx]

### Ancestral genome reconstruction

Ancestral genome reconstruction was performed with the CHROnicle suite of programs freely available at [www.lcqb.upmc.fr/CHROnicle/](http://www.lcqb.upmc.fr/CHROnicle/) that comprises SynChro, ReChro and AnChro. (AnChro source code can also be found in Supplemental Material).

#### SynChro: Construction of conserved synteny blocks

Conserved synteny blocks were identified between pairwise combinations of genomes with SynChro ([Drillon et al. 2014](#_ENREF_5)). The synteny block stringency  which determines the maximum number of intervening Reciprocal Best Hits (RBH) allowed between anchors within a synteny block wassetfromsee below and ([Drillon et al. 2014](#_ENREF_5)) for details).

#### ReChro: Identification of linked breakpoints

ReChro estimates the evolutionary distance between 2 genomes under the ‘double-cut-and-join’ (DCJ) model of genome rearrangement ([Yancopoulos et al. 2005](#_ENREF_13)) through the construction of an adjacency graph. Vertices in the graph components are the adjacencies between 2 consecutive synteny blocks (or between a synteny block and a telomere) in one genome and edges connect equivalent block extremities (or telomere) between the 2 compared genomes ([Bergeron et al. 2008](#_ENREF_2)). The adjacency graph is composed of cycles, when all vertices are synteny block adjacencies, and paths, when at least one vertex involves a telomere. When adjacencies are problematic to define because synteny blocks overlap, are nested, duplicated, dubious or unsigned (Supplemental Fig. S9A), ReChro tests all possible block arrangements in terms of order, orientation and presence such that the problematic adjacencies are resolved into simple adjacencies (Supplemental Fig. S9A). These sets of combinations were defined as 'synteny packs' ([Drillon et al. 2011](#_ENREF_4)). In these cases, ReChro generates all the cycles/paths corresponding to all combinations, calculates a score for each combination and validates the combination with the smallest score. The score that *ReChro* calculates for a combination is the sum of the averages and the standard deviations of the lengths of the cycles/paths passing by all block adjacencies present in the corresponding combination.

ReChro uses as input the list of conserved synteny blocks between 2 genomes generated by SynChro and provides an estimation of the number of DCJ rearrangements and reuse rate associated with each component (cycle or path) of the adjacency graph (Supplemental Fig. S10). In addition, ReChro assigns a type of rearrangement to each component of the adjacency graph depending on the type of component, the length of the component and the location of the synteny blocks involved in the component (on the same or on different chromosomes, in one or in the 2 genomes). These types of rearrangements include 'fusion/fission,' 'transposition', 'inversion' (internal or terminal), 'translocation' (internal or terminal) or 'inversion/translocation' when it is not possible to discriminate between the 2 latter types. The algorithmic details of this classification are in the ReadMe file of ReChro, <http://www.lcqb.upmc.fr/CHROnicle/ReChro.html>.

#### AnChro: Inference of ancestral gene order in chromosomes

Given a set of extant genomes with phylogenetic relationships given by a tree *T*,AnChro reconstructs the ancestral genome organization at node *N* by using (i) two genomes *G1* and *G2* that are connected in *T* by a pathway that crosses *N* and (ii) a group of reference genomes *G3..Gn*. Each reference genome is connected to *N* in *T* by a pathway that does not cross the *G1G2* pathway (Supplemental Fig. S11). *AnChro* uses as input (i) the list of cycles/paths between *G1* and *G2* and (ii) the list of synteny blocks for the *G1Gr* and *G2Gr* comparisons, with *Gr* being a reference genome belonging to the *G3..Gn* group (Supplemental Fig. S12).

The ancestral reconstruction process relies on the 5 following steps.

Step 1: computation of confidence scores. Given *A* and *B*, two adjacent synteny blocks in *G1* determined from the *G1G2*comparison, the adjacency between *A* and *B* in *G1* is written . For each adjacency and each Gr reference genome, the is calculated to determine the level of confidence (between 0 and 1) of observing in the *G1Gr*comparison. Because the *A* and *B* blocks are defined from the *G1G2*comparison, they don't have direct equivalent in the *G1Gr*comparison. Therefore, the presence of is sought at the gene level in and the depends on the existence and the position of 4 anchor genes called *a*, *a’*, *b* and *b’* flanking the adjacency in the *G1Gr* comparison, as detailed in the legend of Supplemental Fig. S13.

Step 2: validation of ancestral adjacencies. For each cycle/path, the adjacencies with the highest and non-null *cScores* are validated as being ancestral if they are not in conflict with other adjacencies already validated with higher *cScores*. Note that when two conflicting adjacencies have the same highest *cScore*, none of them are validated.

Step 3: completion of ancestral adjacencies. Some of the adjacencies that were not validated in step 2 because they were absent from all reference genomes can still be validated based on their affiliation to a component of the adjacency graph*.* For instance, in a cycle of length 4, if only one of the two block adjacencies in *G1* is validated as ancestral in Step 2, the other adjacency can also be validated because both adjacencies result from the same rearrangement and are linked in the same cycle (Supplemental Fig. S9B). More generally, for cycles of length *2k*, when *k-1* adjacencies are validated as ancestral in Step 2, the *kth* adjacency can be validated from the cycle. Note that for cycles of length ≥ 6 (involving at least one re-used breakpoint), this strategy allows to infer the *kth* adjacency even when this adjacency is absent from all extant genomes, including *G1* and *G2* (Supplemental Fig. S9C).

Step 4: construction of ancestral chromosomes. For each reconstruction, one and only one solution exists to assemble all synteny blocks into ancestral chromosomes (or scaffolds) based on the list of ancestral adjacencies validated during the 2 previous steps. The process of chromosome reconstruction is performed step by step, starting by a telomeric synteny block, validated as being ancestral, and extending towards the other chromosome end by looking among the validated adjacencies for consecutive synteny blocks until another validated telomeric block is reached. During this process, if no validated adjacency is found at a synteny block extremity, the reconstruction is stopped for this chromosome and left incomplete under the form of a scaffold. When a chromosome or a scaffold is achieved, reconstruction is re-initiated at another ancestral telomeric block and repeated in the same way until no telomeric block remains available. If some validated block adjacencies are left unassembled, reconstruction is initiated from a non-telomeric validated adjacency until all validated adjacencies are used. If circular chromosomes are generated, for instance in the case where three adjacencies (*AB*), (*BC*) and (*CA*) were validated as ancestral, the adjacency with the smallest is deleted to linearize the scaffold.

Step 5: resolution of micro-rearrangements.

Each ancestral chromosome, or scaffold, is assembled as an ordered list of synteny blocks encompassing all genes that lie between the first and the last anchor of each block. This list is then translated into two homologous gene lists, one according to *G1* and the other to *G2,* containing only the syntenic homologues corresponding to the anchors of the blocks, and purged from all duplicated blocks and duplicated genes, to produce a one-to-one gene relationship between the 2 versions of each ancestral genome (Supplemental Fig. S14). Micro-synteny blocks are defined between these two lists allowing no intervening genes between 2 consecutive pairs of homologues. When the orientation of a micro-synteny block is different between the *G1* and *G2* versions (because of a local chromosomal inversion specific to one genome), the correct orientation is chosen according to the gene orientation found in reference genomes *Gr* (Supplemental Fig. S14). This choice relies on the calculation of a micro-adjacency score for all pairwise comparisons between the *G1* or *G2* ancestral version and the gene orientation in each *Gr*. This score takes into consideration both the relative order and orientation of each gene within the micro synteny blocks. For each micro synteny block, the version of the ancestral genome (either the *G1* or *G2* version) with the highest score is validated as ancestral. In the (unlikely) situation where the *G1* and the *G2* versions produce two equal highest scores, one of them is arbitrarily chosen.

#### Reconstruction of Lachancea ancestral genomes

There are nine ancestral genomes in the *Lachancea* genus, called *L.A1* to *L.A9,* corresponding to the nine nodes in the phylogenetic tree (Fig. 3). We computed 8,532 possible reconstructions of the nine ancestral genomes. The nine ancestors can indeed be reconstructed in 237 different ways depending on the choice of the *G1, G2* and *Gr* genomes on the different branches of the tree (Supplemental Table S13, Supplemental Fig. S11)*.* In addition, each of the 237 reconstructions can be computed with different combinations of the ' and " parameters. Each stringency parameter ranged from 1 to 6, resulting in 36 '/"combinations leading to a total of 8,532 ancestral reconstructions. We found that the 8,532 reconstructions predominantly generate ancestral genomes composed of eight chromosomes (Supplemental Fig. S15A). For each ancestor, several independent reconstructions converged towards eight chromosomes except for *L.A4,* for which reconstructions yielded a minimum of nine chromosomes. The number of genes per ancestral genome varies between 3,986 and 4,931, with the most prevalent class of reconstructions comprising about 4,600 genes (Supplemental Fig. S15A).

#### Choosing the nine optimal reconstructions of Lachancea ancestral genomes

For each of the 237 reconstructions, the 36 '/" combinations are compared and the best one is identified according to the following two criteria. The best '/" combination minimizes (i) the number of inter-chromosomal contradictions, *i.e.* cases where two genes are direct neighbors in one reconstruction while they map on two different chromosomes in another reconstruction, and (ii) the number of chromosomes, to avoid fragmented reconstructions bearing less contradictions just because less adjacencies were reconstructed. Note that the number of intra-chromosomal contradictions is not considered at this step. If several combinations share the same smallest number of inter-chromosomal contradictions and chromosomes, the '/" combination reconstructing the highest number of genes is chosen. Finally, if several combinations also share the same number of genes, the combination with the smallest values of ' and " is chosen. Overall, this pipeline generates the list of the 237 *G1/G2/Gr* reconstructions with the optimal '/" values.

Then, for each of the nine ancestors all the '/" optimal reconstructions corresponding to different combinations of *G1, G2* and *Gr* genomes are compared according to following rules: (i) minimizing both the number of inter-chromosomal contradictions and chromosomes and (ii) maximizing the number of reconstructed genes. This second step identifies the nine optimal reconstructions, all composed of 8 chromosomes except *L.A4* composed of 9 scaffolds. The number of genes per ancestral genome varies between 4,446 for *L.A1* to 4,799 for *L.A9* (Fig. 3, Supplemental Fig. S15B, Supplemental Table S14). Each of the nine optimal reconstructions of ancestral genomes is provided as a list of ordered ancestral genes with their corresponding orthologous genes in all 10 extant *Lachancea* species (Supplemental Table S6). Following the syntax proposed in ([Durrens and Sherman 2005](#_ENREF_6)), ancestral genes were given names such as A3LA01-08350g, where the first four digits represent the species (here Ancestor 3 of *LAchance*a), the 2 next digits give the chromosome number (01) and a 5 decimal element number (08350, the numbering proceeds by increments of 22 leaving room for insertions) and a one-letter code indicating the type of element (g for an element that has or may have a translation product, e.g. protein-coding gene or pseudogene). Reconstruction of chromosome history in the genus *Lachancea* is based on these nine optimal reconstructions.

#### Identification of chromosomal rearrangements along the different branches of the tree

To identify rearrangements along the different branches of the tree, we recomputed the synteny blocks between consecutive ancestral genomes or, in terminal branches, between an ancestor and an extant genome, with the stringency parameter in SynChro set to zero (Δ=0). Using this setting, SynChro breaks the synteny blocks when a single RBH gene-pair is not conserved in synteny between the 2 genomes. SynChro also breaks the synteny blocks when a single RBH gene-pair is conserved in synteny but shows opposite transcriptional orientation between the 2 genomes, as compared to the transcriptional orientation of the neighboring RBHs in the block. In these two specific cases, SynChro builds a synteny block comprising a single, non-syntenic or inverted, RBH gene-pair. The corresponding lists of synteny blocks are then provided to ReChro to assign all the rearrangements that occurred in each branch of the tree, including the single gene inversions that correspond to the single inverted RBH blocks.

#### Validation of AnChro's optimal reconstructions

Centromere Position: the chromosomal location of the centromeres in ancestral genomes can be used as an estimate of reconstruction accuracy because yeast have point centromeres that are conserved in synteny in orthologous intergenic regions over the entire evolution of the Saccharomycetaceae family ([Gordon et al. 2011](#_ENREF_9)). Here, 76 out of the 79 current *Lachancea* centromeres (representing the eight orthologous centromeres) are flanked on both sides by orthologous genes in the 10 extant genomes. A synteny breakpoint occurred between the 3 remaining centromeres and their first neighboring gene on one side (one in the terminal branch leading to *L. mirantina* and one in the branch b3 common to *L. cidri* and *L. fermentati*). However, these centromeres remained flanked on their other side by orthologous genes in the 10 extant species. This nearly perfect conservation of centromere location provides a reliable guide to infer their ancestral positions. All ancestral chromosomes reconstructed with AnChro comprised a single centromere per chromosome, except the small ninth scaffold in *L.A4* which comprised no centromere, as expected for correct reconstructions (Fig. 3 and Supplemental Fig. S15B). It is important to note that *AnChro* does not use the centromere position to reconstruct ancestral genomes and that centromeres were remapped *a posteriori* on reconstructed ancestral chromosomes based on their actual positions in extant species (Supplemental Table S1). Below we calculated the probability to achieve by chance the reconstruction of an ancestral genome with a single centromere per chromosome.

For each ancestral genome, we defined *T* asthe total number of possible reconstructions with eight chromosomes (or with nine scaffolds for *L.A4*) and *U* asthe total number of reconstructions with a single centromere per chromosome amongst *T*. The probability of reconstructing an ancestral genome with a single centromere per chromosome is then simply *U/T.*

We used the following variables:

***N***: the total number of synteny blocks between the 2 genomes *G1* and *G2* used to reconstruct a given ancestral genome

***C***: the total number of centromere-containing synteny blocks amongst *N* (C=8)

***s***: the number of reconstructed ancestral chromosomes in a given ancestral genome (s=8 or s=9 for *L.A4*)

***ni***  : the number of synteny blocks in the ancestral chromosome *i* in a given ancestral genome

***k***: the expected number of centromeres per ancestral chromosome (k=1)

We calculated *ti,* the total number of reconstructions for each chromosome *i* in a given ancestral genome:

Then we calculated *T,* the total number of possible genome reconstructions for a given ancestor:

Then for a given ancestral genome, the probability *Pcen* to have 1 centromere (cen) per chromosome (chr) is:

Note that because all blocks are used for the reconstruction and there is a single centromere left for the last chromosome. Each individual term of *Pcen* can be calculated with the hypergeometric distribution. Therefore, for each chromosome *i*, the probability to have *k* centromere(s) is:

Then, the probability *ui* to reconstruct the chromosome *i* with a single centromere is:

Then, for a given ancestral genome, the total number of reconstructions with a single centromere per chromosome is:

Finally, the probability of reconstructing a given ancestral genome with a single centromere per chromosome is:

We found that these probabilities ranged from 2.0x10-3 for *L.A6* to 3.5x10-4 for *L.A4.* The overall probability of reconstructing the nine ancestral genomes of the genus with a single centromere per chromosome equals the product of the nine individual probabilities: 1.4x10-27.

Comparisons to previous reconstructions: We compared the structure of *L.A1*, the last common ancestor of the *Lachancea* clade reconstructed by *AnChro*, to the reconstruction achieved by the previously published ANGES algorithm ([Jones et al. 2012](#_ENREF_10)). The same 12 ancestral adjacencies resulting from 6 translocations are identically reconstructed by the two methods, meaning that no inter-chromosomal contradiction exists between the two independent reconstructions (Fig. 4A). However, *AnChro*'s reconstruction generates eight scaffolds and 4,446 ancestral genes while ANGES’s reconstruction generates 32 scaffolds and only 3,210 genes. The 24 ancestral adjacencies not reconstructed by ANGES all correspond to adjacencies still present in the *L. kluyveri* genome. Overall, *AnChro*'s reconstruction is more complete than ANGES’s reconstruction both in terms of scaffolds and ancestral genes.

We also compared the structure of the pre-WGD ancestral genome (see Fig. 1C) manually reconstructed by Gordon and collaborators ([Gordon et al. 2009](#_ENREF_8); [Gordon et al. 2011](#_ENREF_9)) to the version automatically reconstructed by *AnChro* using *L. kluyveri* and *Z. rouxii* as *G1* and *G2* genomes (with ' and *S. cerevisiae* and *C. glabrata* as reference genomes (with ''=3). We found a single difference between the two reconstructions consisting of an additional non-reciprocal translocation between ancestral chromosomes 1 and 2 in *AnChro's* reconstruction (Fig. 4B). The ancestral adjacency predicted by the manual reconstruction corresponds to the SAKL0C03630g-SAKL0C03762g gene adjacency in *L. kluyveri* while in *AnChro*'s reconstruction it corresponds to the ZYRO0F15730g-ZYRO0F15884g gene adjacency found in the *Z. rouxii* genome. We manually checked which of the two ancestral adjacencies would be the correct one using the *Yeast Gene Order Browser* ([Byrne and Wolfe 2006](#_ENREF_3)). We found that both ancestral adjacencies are equally likely because the adjacency predicted by the manual reconstruction is conserved in the post-WGD genomes *Vanderwaltozyma polyspora*, *Tetrapisispora blattae* and *Tetrapisispora phaffii*the while the adjacency predicted by *AnChro* is conserved in *S. cerevisiae, C. glabrata, Kazachstania africana* and *Kazachstania naganishii*.

#### Benchmarking *AnChro*'s default reconstructions against other software tools

We benchmarked *AnChro* against the three adjacency-based reconstruction software ANGES ([Jones et al. 2012](#_ENREF_10)), GapAdj ([Gagnon et al. 2012](#_ENREF_7)) and PMAG+ ([Yang et al. 2014](#_ENREF_14)), and with the distance-based algorithm MGRA ([Alekseyev and Pevzner 2009](#_ENREF_1)). To benchmark the five reconstruction tools as fairly as possible, we used I-ADHoRe ([Simillion et al. 2004](#_ENREF_12)) to compute synteny blocks for all tools. In addition, we skipped all optimization steps in *AnChro* by computing a single default reconstruction for each ancestor. *AnChro*'s default reconstruction is based on the pair of genomes *G1, G2* that minimizes the number of synteny blocks (i.e. the two genomes that are the least rearranged relatively to the ancestor that is to be reconstructed). Note that these settings are disadvantageous for *AnChro* that is normally conceived to use synteny blocks constructed by *SynChro* and that is intrinsically designed to perform multiple pairwise comparisons to reconstruct a given ancestral genomes.

For ANGES, GapAdj, PMAG+ and MGRA, we computed the universal synteny blocks shared between the 10 *Lachancea* genomes and *Z. rouxii* genomes with I-ADHoRe using the following parameters: colinear cluster type, gg4 alignment, gap size 30, cluster gap 35, 3 anchor points, level_2_only false. For *AnChro*, we computed the pairwise synteny blocks with I-ADHoRe using the same parameters as above except that the 'level_2_only' parameter was set to 'true'. On average, the universal and pairwise synteny blocks cover 70 ± 2% and 86 ± 5% of the *Lachancea* and *Z. rouxii* genes, respectively.

Ancestral genome reconstructions were achieved with ANGEs using the parameters provided by the authors for fungal genomes (Project non_dup_yeasts). The option markers_doubled was set to 1 so that the orientation of the markers can be inferred in the ancestor. The option c1p_spectral was set to 1 because spectral seriation is not available for doubled markers. GapAdj was run with a delta of 1 and a threshold of 0.6 as recommended in the software documentation. MGRA was used with the parameter stages set to 3 as recommended in the documentation. PMAG+ cannot be downloaded so a Python script was written to automate and forward the reconstruction queries to [www.geneorder.org](http://www.geneorder.org) and choosing the “Ancestral Genomic Reconstruction (SPP)” option.

We assessed the quality of the *L.A1* to *L.A9* reconstructions by comparing the final number of reconstructed ancestral scaffolds and ancestral genes between the five algorithms and by comparing the number and positions of ancestral centromeres. For *AnChro*, the positions of ancestral centromeres were inferred from their actual positions in extant species as explained above in § 'Centromere Position'. For the other four tools, six syntenic centromeres mapped within universal blocks. Therefore, we could easily infer the positions of the corresponding centromeres in the ancestral chromosomes when the corresponding blocks were present in the reconstructions. For the two other centromeres, each lied between two universal synteny blocks. We inferred their positions in ancestral chromosomes from the relative position of the two flanking blocks in the reconstructions when present and located them on the same ancestral scaffold at less than three blocks apart.

GapAdj and PMAG+ generate highly contiguous reconstructions constituted on average of 7.3 ± 0.7 and 7.6 ± 0.7 ancestral chromosomes, respectively. Note that all *Lachancea* ancestors are supposed to comprise eight chromosomes. ANGES and MGRA produce more fragmented ancestral genomes with on average 15.4 ± 9.3 and 16.1 ± 4.8 scaffolds, respectively. *AnChro*'s default reconstructions produce ancestral genomes composed on average of 9.7 ± 2.4 chromosomes (Fig. 4C). The total number of genes per ancestral genome varies between 4,566 and 4,831 for *AnChro* while it is comprised between 1,200 and 3,400 for the 4 other reconstruction tools (Fig. 4C). Therefore *AnChro*'s default reconstructions clearly comprise the highest number of ancestral genes. In addition, all *AnChro’s* defaultreconstructions comprised eight centromeres located on distinct chromosomes while the number of centromeres per ancestral genome varies between one and six, with 4 cases where two centromeres are in the same ancestral scaffold for the 4 other tools (Fig. 4C).

#### Benchmarking ancestral reconstructions from simulated genomes

We used computer simulations based on a realistic evolutionary model to quantitatively assess the quality of the reconstructions produced by ANGEs, GapAdj, MGRA, PMAG+ and the default reconstructions of *AnChro* (see above). Starting with a hypothetical ancestral genome having 5,000 genes distributed along eight chromosomes, each containing a single centromere, we simulated 100 binary trees having 11 leaves and 9 nodes similar to the *Lachancea* tree rooted with an outgroup species. Linearized phylogenetic trees of 11 taxa were randomly generated using the branching process described in ([Kuhner and Felsenstein 1994](#_ENREF_11)). In each tree, chromosomal inversions and reciprocal translocations are simulated along each branch, with at least 10 events per branch, such that the total number of events is approximately 400, a number comparable to the number of events identified in the *Lachancea* genus. The probabilities of generating inversions and reciprocal translocations equal 0.5. The distribution of inversion length follows a Poisson distribution with a mean of 5 genes. For each tree, both universal and pairwise synteny blocks were computed between extant genomes, corresponding to the leaves, with i-ADHoRe using the same parameters as above. Note that here genes are represented by numerical identifiers, not by actual nucleotide or amino-acid sequences. All 900 ancestral genomes (9 ancestors x 100 trees), corresponding to the nodes, were reconstructed with ANGEs, GapAdj, MGRA, PMAG+ and *AnChro*. The quality of the reconstructions was assessed by comparing the number of scaffolds, genes and the percentage of scaffolds having a single centromere in the reconstructions to their corresponding features in the known simulated genomes. *AnChro*'s default reconstructions comprise on average 4,602 genes while the 4 other tools reach an average of about 1,500 genes (Fig. 4D). The number of ancestral genomes reconstructed with eight chromosomes is variable: 213 using *AnChro*, 217 using PMAG+, 46 using GapAdj, 3 using ANGES and only 1 using MGRA. *AnChro,* PMAG+, GapAdj, ANGEs and MGRA's reconstructions comprise 42.0%, 22.1%, 13.1%, 3.5% and 3.1% of scaffolds with a single centromere, respectively (Fig. 4D).

In addition, we computed the average proportions of correctly and incorrectly reconstructed adjacencies between consecutive synteny blocks in the 900 reconstructed genomes comparatively to their simulated counterparts. We discriminated between single block inversions, intra- and inter-chromosomal contradictions among incorrectly reconstructed adjacencies. We also estimated the average proportions of adjacencies that were not reconstructed by the different software. These results are represented in Fig. 4E. This analysis revealed that *AnChro* reconstructs the highest proportion of correct adjacencies (67.9%) compared to PMAG+, ANGEs, MGRA and GapAdj (48.2%, 32.8%, 24.4% and 16%, respectively). In addition *AnChro* reconstructs the smallest proportion of incorrect adjacencies (3.5%) compared to MGRA, ANGEs, PMAG+ and GapAdj (27.6%, 41%, 48% and 77.6%, respectively). These figures correspond to positive predictive values (PPV=TP/(TP+FP)) of 0.95, 0.50, 0.47, 0.44 and 0.17 for *AnChro*, PMAG+, MGRA, ANGEs and GapAdj, respectively. If one considers only the relative block order, regardless of the block orientation, adjacencies involved into single block inversions could be considered as correct. Then, PPVs ((correct adjacencies+inversions)/(correct adjacencies+inversions+incorrect adjacencies)) become 0.98, 0.81, 0.78, 0.75 and 0.44 for *AnChro*, PMAG+, ANGEs, MGRA and GapAdj, respectively. Therefore, the proportion of genome evolution inferred in the manuscript that would be due to errors in *AnChro*'s reconstructions is about 3.5% or 1.5% if we consider the inverted blocks as correctly positioned. In addition, these proportions might be a bit overestimated because the calculations are made on *AnChro*'s default reconstructions (I-ADHoRe blocks and no optimization step) while *Lachancea* ancestors correspond to *AnChro*'s optimal reconstructions.

#### References

Alekseyev MA, Pevzner PA. 2009. Breakpoint graphs and ancestral genome reconstructions. *Genome Res* **19**(5): 943-957.

Bergeron A, Mixtacki J, Stoye J. 2008. On computing the breakpoint reuse rate in rearrangement scenarios. In *Proc of Recomb-CG*, pp. 226-240.

Byrne KP, Wolfe KH. 2006. Visualizing syntenic relationships among the hemiascomycetes with the Yeast Gene Order Browser. *Nucleic Acids Res* **34**(Database issue): D452-455.

Drillon G, Carbone A, Fischer G. 2011. Combinatorics of chromosomal rearrangements based on synteny blocks and synteny packs. *Journal of Logic and Computation*.

-. 2014. SynChro: a fast and easy tool to reconstruct and visualize synteny blocks along eukaryotic chromosomes. *PLoS ONE* **9**(3): e92621.

Durrens P, Sherman DJ. 2005. A systematic nomenclature of chromosomal elements for hemiascomycete yeasts. *Yeast* **22**(5): 337-342.

Gagnon Y, Blanchette M, El-Mabrouk N. 2012. A flexible ancestral genome reconstruction method based on gapped adjacencies. *BMC bioinformatics* **13 Suppl 19**: S4.

Gordon JL, Byrne KP, Wolfe KH. 2009. Additions, losses, and rearrangements on the evolutionary route from a reconstructed ancestor to the modern Saccharomyces cerevisiae genome. *PLoS Genet* **5**(5): e1000485.

-. 2011. Mechanisms of chromosome number evolution in yeast. *PLoS Genet* **7**(7): e1002190.

Jones BR, Rajaraman A, Tannier E, Chauve C. 2012. ANGES: reconstructing ANcestral GEnomeS maps. *Bioinformatics* **28**(18): 2388-2390.

Kuhner MK, Felsenstein J. 1994. A simulation comparison of phylogeny algorithms under equal and unequal evolutionary rates. *Mol Biol Evol* **11**(3): 459-468.

Simillion C, Vandepoele K, Saeys Y, Van de Peer Y. 2004. Building genomic profiles for uncovering segmental homology in the twilight zone. *Genome Res* **14**(6): 1095-1106.

Yancopoulos S, Attie O, Friedberg R. 2005. Efficient sorting of genomic permutations by translocation, inversion and block interchange. *Bioinformatics* **21**(16): 3340-3346.

Yang N, Hu F, Zhou L, Tang J. 2014. Reconstruction of ancestral gene orders using probabilistic and gene encoding approaches. *PLoS ONE* **9**(10): e108796.
