# Supplementary material for: Reconstruction of ancestral chromosome architecture and gene repertoire reveals principles of genome evolution in a model yeast genus
Source: HighWire-hosted journal article supplement (doi:10.1101/gr.204420.116), 2016-05-31
Supplement: Supplemental_Methods.docx [file Supplemental_Methods.docx]

## DNA extraction by CsCl gradient

The strains were cultivated in 500 mL Erlenmeyer baffled flasks with YPD medium at 28°C. Cells were harvested, lysed with zymolyase, and treated with SDS according to an adapted protocol from ([Querol et al. 1992](#_ENREF_11)). Then, CsCl (1 g/mL) and 10 µL/mL of 10 mg/mL stock solution of bisbenzimide (Hoechst) were added to total DNA. Centrifugation was performed at 50,000 rpm during 24 h in a Beckman centrifuge. Nuclear and mitochondrial DNA were collected separately after centrifugation. DNA concentrations were determined using a NanoDrop 1000 (Thermo Scientific), while quality and integrity were checked using a Bioanalyzer 2100 (Agilent Technologies).

## Genome assembly

Genome assemblies were achieved with Celera Assembler version 6.1 ([Myers et al. 2000](#_ENREF_9)) and Newbler v2.7 (454 Life Sciences) with default parameters. For all species, except *L. mirantina*, both assemblers gave the same results that turn out to be congruent with karyotypes. For *L. mirantina*, contradictory assemblies were compared to chromosome size obtained by PFGE, in order to determine the best assembly. Ribosomal DNA was assembled with Newbler v2.7 and manually integrated into the scaffolds with a hundred N bases surrounding two complete units.

The genome sequence of *L. waltii* was included in this study ([Kellis et al. 2004](#_ENREF_7)). An assembly error was detected in the vicinity of the *MAT* locus. PCR amplifications were performed to reorder the 3 genes *CBP1*, *NUC1* and *LAA1* (see primer list in Supplemental Table S11). Additionally, a misassembly was detected in the *L. waltii* assembly version of 2011 ([Di Rienzi et al. 2011](#_ENREF_4)) where the superscaffold 34, containing the rDNA cluster, has been inverted within chromosome 8 compared to the initial and correct superscaffolding from 2004 ([Kellis et al. 2004](#_ENREF_7)). Both chromosome sequences have been corrected in the present release of the *L. waltii* genome. After assembly, gaps remained at *MAT* loci and some associated silent cassettes. PCR were performed to amplify the missing sequences. After separation of PCR products on agarose gel, bands corresponding to the *MATa* and *MATα* loci were separated on agarose gels, purified (QiaQuick gel extraction kit, Qiagen) and sequenced (see primer list in Supplemental Table S11). Sequences have been manually integrated into the corresponding scaffolds.

## Annotation of *Lachancea* genomes

#### Gene structure annotation

Gene models were annotated for the seven newly sequenced genomes with an annotation transfer pipeline that we developed with the AMADEA Biopack platform (Isoft, <http://www.isoft.fr/bio/biopack_en.htm>). In the first step of the pipeline, the set of protein-coding genes of both reference species are decomposed in exons and used for TBLASTN search in the 8 genomes to be annotated. At each locus, the best hit is conserved if the score is higher than 50. Then, from each of this set of putative gene locations, gene structure is identified and reconstructed, by trying to retrieve as many exons as in the reference and the start and stop codons; this includes the search of intron patterns of the Genosplicing website (<http://genome.jouy.inra.fr/genosplicing/index.html>). The use of the intron pattern of the most closely-related species ([Neuveglise et al. 2011](#_ENREF_10)), used as a reference, increases the accuracy of exon-intron junction definition. About 6.3 % of protein-coding genes are interrupted by introns and very few genes contain 2 introns (between 11 and 17 depending on the species, Supplemental Table S2).

The Amadea annotation workflow allows data exportation in the EMBL file format, for visualization with third-party tools such as Artemis ([Rutherford et al. 2000](#_ENREF_12)). This format enables the use of colour-code tags to highlight ambiguous regions which simplifies further manual curation. The manual curation consists in resolving gene models with missing start or stop codons, with not properly defined introns or with frameshifts. Additional CDSs (usually less than a hundred per genome) were identified in intergenic regions of the 10 species by BLASTX search against the nr database and manual curation. Finally, ORFs longer than 150 aa without any homologs in the nr database were predicted with Orffinder (NCBI) and annotated in the remaining intergenic regions.

#### Functional annotation

The functional annotation of genes has been established on the basis of homology with *S. cerevisiae* genes (SGD S288C ORF translations, release February 3, 2011, available at http://downloads.yeastgenome.org/sequence/S288C_reference/orf_protein/), or NCBI Reference Sequence (RefSeq) database (release 58 of March 11, 2013, available at http://www.ncbi.nlm.nih.gov/refseq/) for putative genes without homologs in *S. cerevisiae*. To this end, the best BLASTP hit for each *Lachancea* gene was identified; query and reference sequences were then compared in terms of length and protein sequence similarity after global pairwise alignment using the Needleman-Wunsch algorithm (EMBOSS Needle tool). Thresholds used to assign a gene name and a level of similarity correspond to those previously used by the Génolevures consortium ([Dujon et al. 2004](#_ENREF_5)). Briefly, if the CDS length represents more than 70% of the pairwise alignment, three classes of similarity are defined: highly similar (≥80% aa similarity), similar (≥50% and <80% aa similarity) and weakly similar (≥20% and <50% aa similarity). CDSs with similarities restricted to functional domains are considered as having "some similarities" if the alignment is at least 50 aa in length with at least 50% similarity. Otherwise, CDS are considered as having no similarity. Genes with previous uniprot numbers and experimentally validated functions were manually annotated. This case includes 56 *L. kluyveri* genes, four *L. thermotolerans* genes and one *L. cidri* gene. Genes at the *MAT* locus and associated silent cassettes were manually annotated.

#### Annotation of non-coding RNA genes

tRNA genes were predicted with tRNAscan-SE (v.1.3.1) ([Lowe and Eddy 1997](#_ENREF_8)) with default searching parameters of tRNAscan and EufindtRNA; covariance model: tRNA2-euk.cm. The number of tRNA genes varies from 193 (*L. cidri*) to 258 (*L. kluyveri,* see Supplemental Table S2). The snRNA genes were searched by BLASTN using *L. kluyveri* and *L. thermotolerans* known snRNA sequences as query. A single rDNA locus located internally to a chromosome arm is found in each genome (Supplemental Table S2). The 5S and 35S RNA molecules are encoded on opposite strands next to each other in all 10 species.

#### Annotation of transposable elements

Using BLAST against known transposable elements of *Ty1/Copia*, *Ty3/Gypsy* and class-II superfamilies, we identified complete and partial elements as well as solo-LTRs. Elements of the *Rover* and *Roamer* families are described elsewhere ([Sarilar et al. 2014](#_ENREF_13)).

#### Annotation of centromeres

The position of centromeres in the seven newly sequenced *Lachancea* genomes and in *L. waltii,* was inferred from synteny conservation with already annotated centromeres in the three reference species, *L. thermotolerans, L. kluyveri* and *Z. rouxii* ([Souciet et al. 2009](#_ENREF_14)). In 67 cases, homologs to the genes that flank the centromeres in at least one reference species were conserved in synteny in the other genomes. In 3 cases, the regions corresponded to a synteny breakpoint in all reference genomes leading to 2 regions to investigate in each case. The sequences of the corresponding 73 intergenic regions were subjected to the motif finder program MEME ([Bailey and Elkan 1994](#_ENREF_2)), using the oops mode on both strands, to look for a 25 nt long motif similar to CDE III from reference species. A smaller motif of 8 bp was then sought upstream of these putative CDE III in the corresponding intergenic regions. Finally we checked whether the size and the AT content of the intervening regions between putative CDE I and CDE III were compatible with CDE II characteristics (Supplemental Fig. S1, Supplemental Table S1).

## Construction of gene families

An all-against-all BLASTP (version 2.2.28+) comparison was performed between amino-acid translations of all CDS from the 10 *Lachancea* species and *S. cerevisiae*, with default options and Smith-Waterman alignment ([Altschul et al. 1997](#_ENREF_1)). Hits with an E-value lower than 10-3 were clustered with TribeMCL ([Enright et al. 2003](#_ENREF_6)). A wide range of Inflation values were tested. The different clustering results were evaluated based on the grouping of the orthologous families defined beforehand (see above) and of the previously identified *S. cerevisiae* ohnologs ([Byrne and Wolfe 2006](#_ENREF_3)). Moreover, multiple alignments of the biggest clusters for each clustering test were visually inspected in order to determine a bottom threshold of I value, beyond which larger non-informative clusters were formed. On the basis of these 3 criteria, we chose an inflation value I=6.5, representing the optimal trade-off between specificity (grouping of only homologous sequences in a given cluster) and sensitivity (splitting of a group of homologous sequences into more than one cluster). The clustering was performed either with or without *S. cerevisiae* proteins. The two resulting sets of clusters were similar, showing that the presence of the *S. cerevisiae* CDS does not affect the clustering of the *Lachancea* CDS. Including the S*. cerevisiae* proteome in the clustering allowed the transfer of *S. cerevisiae* functional annotations to the homologous *Lachancea* protein families. The complete set of the 51,110 CDS and 1,018 pseudogene translation products from the 10 *Lachancea* genomes were clustered into 4960 homologous gene families (comprising at least 2 CDS or pseudogenes), 631 singleton CDS and 23 singleton pseudogenes.

## References

Altschul SF, Madden TL, Schaffer AA, Zhang J, Zhang Z, Miller W, Lipman DJ. 1997. Gapped BLAST and PSI-BLAST: a new generation of protein database search programs. *Nucleic Acids Res* **25**(17): 3389-3402.

Bailey TL, Elkan C. 1994. Fitting a mixture model by expectation maximization to discover motifs in biopolymers. *Proceedings of the Second International Conference on Intelligent Systems for Molecular Biology*: 28-36.

Byrne KP, Wolfe KH. 2006. Visualizing syntenic relationships among the hemiascomycetes with the Yeast Gene Order Browser. *Nucleic Acids Res* **34**(Database issue): D452-455.

Di Rienzi SC, Lindstrom KC, Lancaster R, Rolczynski L, Raghuraman MK, Brewer BJ. 2011. Genetic, genomic, and molecular tools for studying the protoploid yeast, L. waltii. *Yeast* **28**(2): 137-151.

Dujon B, Sherman D, Fischer G, Durrens P, Casaregola S, Lafontaine I, De Montigny J, Marck C, Neuveglise C, Talla E et al. 2004. Genome evolution in yeasts. *Nature* **430**(6995): 35-44.

Enright AJ, Kunin V, Ouzounis CA. 2003. Protein families and TRIBES in genome sequence space. *Nucleic Acids Res* **31**(15): 4632-4638.

Kellis M, Birren BW, Lander ES. 2004. Proof and evolutionary analysis of ancient genome duplication in the yeast Saccharomyces cerevisiae. *Nature* **428**(6983): 617-624.

Lowe TM, Eddy SR. 1997. tRNAscan-SE: a program for improved detection of transfer RNA genes in genomic sequence. *Nucleic Acids Res* **25**(5): 955-964.

Myers EW, Sutton GG, Delcher AL, Dew IM, Fasulo DP, Flanigan MJ, Kravitz SA, Mobarry CM, Reinert KH, Remington KA et al. 2000. A whole-genome assembly of Drosophila. *Science* **287**(5461): 2196-2204.

Neuveglise C, Marck C, Gaillardin C. 2011. The intronome of budding yeasts. *Comptes rendus biologies* **334**(8-9): 662-670.

Querol A, Barrio E, Huerta T, Ramon D. 1992. Molecular monitoring of wine fermentations conducted by active dry yeast strains. *Applied and environmental microbiology* **58**(9): 2948-2953.

Rutherford K, Parkhill J, Crook J, Horsnell T, Rice P, Rajandream MA, Barrell B. 2000. Artemis: sequence visualization and annotation. *Bioinformatics* **16**(10): 944-945.

Sarilar V, Bleykasten-Grosshans C, Neuveglise C. 2014. Evolutionary dynamics of hAT DNA transposon families in Saccharomycetaceae. *Genome Biol Evol*.

Souciet JL, Dujon B, Gaillardin C, Johnston M, Baret PV, Cliften P, Sherman DJ, Weissenbach J, Westhof E, Wincker P et al. 2009. Comparative genomics of protoploid Saccharomycetaceae. *Genome Res* **19**(10): 1696-1709.
