# Supplementary material for: Reconstruction of ancestral chromosome architecture and gene repertoire reveals principles of genome evolution in a model yeast genus
Source: HighWire-hosted journal article supplement (doi:10.1101/gr.204420.116), 2016-05-31
Supplement: Supplemental_Table_S1_to_S5.xlsx [file Supplemental_Table_S1_to_S5.xlsx]

## Sheet: Table S1
species	chr	gene-up	gene-down	centromere	start-CDEI	stop-CDEI	seq-CDEI	start-CDEII	stop-CDEII	seq-CDEII	len-CDEII	AT-content-CDEII	start-CDEIII	stop-CDEIII	seq-CDEIII	strd
LACI	LACI0A	LACI0A03136g	LACI0A03180g	LACI0A03158s	295269	295276	GTCACATG	295277	295440	ACACATAATAAAACTAATAATATGAACATTATTTATCATTTAATGCTCTAATATCTTTTGTTTAAATTTAGCTCTTATTTTTATGAAATAAATATTTAAATTTATTTAGATACTGTTAAATGTAAACCAAATGAATTTATTTTACGAAAACAAAAATGCTTTAG	164	82.9	295441	295465	TGTGTCAGTTTGCCGAAGGCATAAA	+
LACI	LACI0B	LACI0B03466g	LACI0B03510g	LACI0B03488s	302897	302890	ATCACCTG	302889	302733	ACTATTAGAATAAATATATAGTGATTTTAATATAATAATCTTTAATTTTAAAATATACACTTAAATAAAAAGTAATAATTATTTTTATTAATATATATTAAATAAAGTAATTCTCGATTATTAATTCTTAAAAGTTTTGTTTTTAACGTTTTATAGT	157	88.5	302732	302708	GTTTTTGTACATCCGAAGAAAAATA	-
LACI	LACI0C	LACI0C01728g	LACI0C01772g	LACI0C01750s	132550	132557	TTCACGTG	132558	132711	TATTTATAATTTACAATTTATTAAATTATTTATTTTAAAACATAATTATAAAATATATGTTTATAATCATGTTATACTAAAATTTAGTTTATATTATATTTTTTTAAATTGCTGTTTTTGATGTCTTATATTTTAAATTATCTTATTAATATTT	154	90.9	132712	132736	TGTATATGAACTCCGAAAAGATTAT	+
LACI	LACI0D	LACI0D03048g	LACI0D03092g	LACI0D03070s	262805	262812	ATCACGTG	262813	262976	ATATGTATAAACAATAAAACTTTAAAATAATTTACTTATTTAATTATTTGACAAATAGTAGTTTTTAATATAAAAAACTATTATTAGTTTAGCTGTATATTTATTAATATCTATTATTTAAATTTTACTTTAAAAACAAATAATTAATAAACTAAAATATACTT	164	89	262977	263001	TGTGTTATATCTCCGAATCTAAAAA	+
LACI	LACI0E	LACI0E01024g	LACI0E01068g	LACI0E01046s	107989	107982	AACACGTG	107981	107818	GCACTTTTAATAAACATTTTTTATTAATATATTTATATATTTAATTAAATAATAATAAGTAGTTTTTGAGAAATTATAATTTATTTAAAAATATAAATATAATTTATTACATTTTTATTTAGTCATTTGTAAATTTTTCTTTACATAAATCATGAAAATATTTG	164	89.6	107817	107793	TGTTTTTGTCTTCCGAAAAGAAAAA	-
LACI	LACI0F	LACI0F09142g	LACI0F09186g	LACI0F09164s	813493	813486	GACACGTG	813485	813322	CTTGTTTTTCAAATTTTATGCATATTATTTTAAATAAATAAATTTAATATATTATTGTTTTGTAGTTTTAGTATAAACTATTTTTAAATAATTATGTCGTAACTAAAAAATTAATATTTCAATTTTGTAAAGCTACTTTTAAATATGTTTTTTTAGTAAAAAAG	164	86.6	813321	813297	TATTTTGGACTTCCGAAAAAAGAAA	-
LACI	LACI0G	LACI0G09340g	LACI0G09384g	LACI0G09362s	801931	801938	ATCACGTG	801939	802102	TATTCATATATTAATTATAACACCTTTAAAAAAACTATTTAAATTGTAAAAAAAACAACATAATGCGTTAACCAATTTTATACTTTTATTTATTATTTAAAAATAGTATTTGTTAAAAGTAAAGTTTTTTATAAAAATTAAAAATTAACAATTATAAAAATGCT	164	87.2	802103	802127	TGTTAGAGTGCTCCGAAAAAATTAA	+
LACI	LACI0H	LACI0H17172g	LACI0H17216g	LACI0H17194s	1493622	1493629	TTCACGTG	1493630	1493813	TACATATCTATTTTAATTTTAATACTTAAATACATTAAAATTAAATTTCATAATAAAACTACAAATTGTATGTATTAAATTTATATTTTATAATAGCTATTACTTCCTTTATTTTGTATGTAAATAAAGTTTCAGTCAATATAGTAATAATTATAAGTGATGTTGAATTTTAGTTAAAAACTAT	184	85.3	1493814	1493838	TGTGTCACAAGTCCGAATCAAAAAA	+
LADA	LADA0A	LADA0A07096g	LADA0A07140g	LADA0A07118s	629110	629117	GTCATCTG	629118	629200	ATCCCTTTATGTTTTAAATTAAAAAAGTGTTATAAACAATATACAAATTAAAATATAATGCAAGCAAAATTAGAAAAAGTTGT	83	81.9	629201	629225	TGTGTTAGAGGTCCGAAACCCGTTT	+
LADA	LADA0B	LADA0B10242g	LADA0B10286g	LADA0B10264s	919571	919578	ATCATCTG	919579	919672	ACCACATTGATAGTTTTTCTTATAATTAAACAATTTATTTAAAATGTAGCTACAAGGATATTATTTTATTTGATTAAAATAATGGTAATCTCAA	94	80.9	919673	919697	AATTTACTATTTCCGAAAAGGTTTT	+
LADA	LADA0C	LADA0C04918g	LADA0C04962g	LADA0C04940s	445844	445851	AACATGTG	445852	445946	ATAGGGTTTCATTCCTTTAATAGAATTTATTTTAATTCTATAAAACGGTTTTGTATAAAAATGAAAACTTTTTTACAATAAAAAACAAAAACAAG	95	81.1	445947	445971	TGGGTTTGGTATCCGAACTTAAAAA	+
LADA	LADA0D	LADA0D10462g	LADA0D10506g	LADA0D10484s	969778	969785	GTCATCTG	969786	969878	ATACAATATTTTTGTTTTGTATAAAATTATTTTTAACTAAAATGTATTAAAGTGGTAAATGAACATTATAAGGTTAAAAAAGGAATATAGTAA	93	83.9	969879	969903	TGTATTAATGTTCCGAATGTATAAA	+
LADA	LADA0E	LADA0E13234g	LADA0E13278g	LADA0E13256s	1238811	1238818	ATCATATG	1238819	1238911	ACAATATATCTTTACTTTTTACTATTTAACATTTATAGAGTTTTGTAATAATTGTTAAATAAAAACAATTTGCAATATAAAAACAAAAAAGCA	93	83.9	1238912	1238936	ATGGTGAGATTTCCGAACATTGAAA	+
LADA	LADA0F	LADA0F06106g	LADA0F06150g	LADA0F06128s	587386	587393	ATCATATG	587394	587486	ACATCTTTTTTCATTATTTGCAAAACATTAAACCTAATATTCTTTATATCTTAATTTTCAAACGTTTCAATAAAACCTTTTTGTACCTATTTA	93	79.6	587487	587511	TGTGTGGGATTTCCGAATAAAATTT	+
LADA	LADA0G	LADA0G11364g	LADA0G11408g	LADA0G11386s	1067733	1067740	GTCATCTG	1067741	1067834	ATACTTCAACATGGTTTTTACTATTAAATTTAAAAGTAATTCATTACTTTAGCTTTTTTGTAAGCAAAGCATAGTAACATTTTCAAAAACTATT	94	78.7	1067835	1067859	TTTATATGATTTCCGAAACGTTAAT	+
LADA	LADA0H	LADA0H16160g	LADA0H16204g	LADA0H16182s	1454401	1454408	AACAGCTG	1454409	1454503	ACTGCAAATATATATTTCTTCAAAGTTTAAAATAAAAGAAAACACTTGTTTTTAACACTTTAGATAATAACAAAAAAACATTTTGAACATATAAG	95	81.1	1454504	1454528	TGTGTAGTGTTTCCGAAAGGGAATA	+
LAFA	LAFA0A	LAFA0A04500g	LAFA0A04544g	LAFA0A04522s	449140	449147	GTCATCTG	449148	449243	ACCATTTTTTATGCATTTAATTCAATTTATGTTTAAAAACAATTATAATTAATGCTATAAATAAAAGCTTATAATGTATAAATAAAAAAGTCTGTT	96	84.4	449244	449268	TGTTAATGATTTCCGAACAAGAAAA	+
LAFA	LAFA0B	LAFA0B02388g	LAFA0B02432g	LAFA0B02410s	236160	236153	ATCATGTG	236152	236058	ATACAAATAACACAATTTTTTATATTTAAATTTGAAGTTTTAATTGGCTTTAGTTAATATTTTATGTTATTTGCAAATTAAATTTATAAAGTAAG	95	85.3	236057	236033	AAAGTTAGCTTTCCGAAGTTATTTT	-
LAFA	LAFA0C	LAFA0C07624g	LAFA0C07668g	LAFA0C07646s	723317	723324	GTCATATG	723325	723427	AGCAAATTTTGGCCAAATACGCAAACATTATTTGTTGTACATTAATTATAGGTGTATTACATTAAATAATTAAAATTTTACTACAAAATTAAACTCAAATTAA	103	79.6	723428	723452	TGTTTTCATCTTCCGAAAAGGGTTT	+
LAFA	LAFA0D	LAFA0D08548g	LAFA0D08592g	LAFA0D08570s	802068	802061	ATCATGTG	802060	801968	ACTGTAATTATTGTTATTTACTAGCTTATATTTTTAAAATTTTAACTTTTTAGTAATATAAACGATTTTTATTTTATGCTGTACATTAATTAT	93	84.9	801967	801943	GTGTTTGACACTCCGAAACCTTTTT	-
LAFA	LAFA0E	LAFA0E07602g	LAFA0E07646g	LAFA0E07624s	806899	806906	AACACGTG	806907	806999	ATAACTTTTTTTACTACTTTGTAAAAAACTAAACTTAAAATCCTTTAAAGTTTATAGAAAAACTTTTAATTGATATTATTGAATAAAATAATG	93	84.9	807000	807024	TGTTTAGAGTTTCCGAAACAGTAAA	+
LAFA	LAFA0F	LAFA0F08526g	LAFA0F08570g	LAFA0F08548s	831173	831166	GTCAGGTG	831165	831075	ATGTAATAACTATAAGTTTTTAACTTTATATTTAAAAAACCTTTATTTTATACAGTTATTTATATTTGTGCTGTATTTGAAATTATCTTTG	91	83.5	831074	831050	TATTTATTGTTTCCGAAAGTATTTT	-
LAFA	LAFA0G	LAFA0G14576g	LAFA0G14620g	LAFA0G14598s	1429736	1429743	TTCACGTG	1429744	1429837	TACCTTATTCTTTTACAAAATCAAATTATTATTGCTAAATTATAACATTTGTAATAATTAAACGAAAACACAAAAAGATATAAAAATAATAAAG	94	84	1429838	1429862	TGTGTAGACTTTCCGAAACAGTATA	+
LAFE	LAFE0A	LAFE0A05974g	LAFE0A06018g	LAFE0A05996s	536225	536218	GTCAGCTG	536217	536055	ACCACTATTACAAAGTATTTAGTAAATTATTAAATTCAATTAAGTTTTTTGTTTTGAAAATTAAATTTACTTTTTAATTAAATACTTATTTATTTTTGTTTGGTTAGCATAACTACTTTATTATTAAATTTAACTTTTAGTTTTTAATTAACAATTTGTTATG	163	85.3	536054	536030	TGTGTCATACTACCGAAGTTAAAAA	-
LAFE	LAFE0B	LAFE0B07140g	LAFE0B07184g	LAFE0B07162s	591788	591795	ATCACGTG	591796	591960	CTTCTGGTTTAAACTTTTTGCACATATTACTTAATGAAATAATACTTTAAATTAAATGCCTCAAACTCCTTTTTAAATAATAAAAAATTAATAGCTGTCCATACTAACATAAATCTATATATTAGCTTGCTATTTAAAAATCAAATAATTTTTAAATATTGTATT	165	80.6	591961	591985	TGTGTATGTGTTCCGAAGAAAGATT	+
LAFE	LAFE0C	LAFE0C09340g	LAFE0C09384g	LAFE0C09362s	793238	793245	TACACGTG	793246	793397	ATTAACATAACTAAATAAAATAGAAGTAATTTTTTTCAATTTATATTTTGAAAAAATAATTTAAACTTTGCAATATATTTTGTTTTTTTTAAATTTCATAGTCTACTAAGTTCAAATATTGTGTATTTTATAAGTTTTTTATAAATTAAGTT	152	86.8	793398	793422	TGTGTTTGTAGTCCGAACTTTAAAA	+
LAFE	LAFE0D	LAFE0D02674g	LAFE0D02718g	LAFE0D02696s	252406	252413	ATCACGTG	252414	252577	CCTTCCAAAAATAATAAAAAAGCTCATTATGGTATTGAATTTAATTTTCAAAAAACATTTTAAAAAATTATTTTTTAAATATTTTATTATATTACATTTAAAAAACTACCTAAAAAAACCATAAATTTTTTACAAAACCTTTTTTATTAAAACATTTGTTTGAG	164	84.8	252578	252602	TGTTCCTTTTTTCCGAACACCTAAA	+
LAFE	LAFE0E	LAFE0E00958g	LAFE0E01002g	LAFE0E00980s	98278	98271	ATCACGTG	98270	98108	AGTCATAAAACAAAAAATTTTGTAACAAAACATAATCTACTATAATTTGATTTTCTTTGAACTTTATTTTATGTTAAACTTAAATTTCTAAACATTTTGTCAATTTTTATGTTTTTATATTGTTTTAAAAGCAAGCTTACTTTTTTATATTTAAGTTTTGTTT	163	83.4	98107	98083	TGTGTGAGCTTTCCGAAAAAGGTTT	-
LAFE	LAFE0F	LAFE0F10176g	LAFE0F10220g	LAFE0F10198s	828207	828214	ATCACGTG	828215	828369	CCTTCATTTTAAAACCTTTGTATATTGAATATTTACTATATAAATAAATGAGAATTATTTTAAATTATTGTATACTATCAATTTATAAATTATAGCTTTTATAATAAAGCTTTTATTATTTTTGTTGGTGAAGTTTTTTATTTTATATGTTTTTT	155	85.2	828370	828394	GGTGGCACAGTTCCGAAAATATTTT	+
LAFE	LAFE0G	LAFE0G11144g	LAFE0G11188g	LAFE0G11166s	952430	952437	ATCACCTG	952438	952587	ACTTATAGTAAAGTTTTTAAAAGTATCTATTTTTTCTAAAATTTAATTAAAATAAAAACATATTAGTTCTATTTAAAAAAATAAAAAAACGTTTAACTTTTTTAAATTTGTACTCTTGAATTAAAAACACATAAAGTTTAGAATAATAAA	150	86.7	952588	952612	TGTGTTAGATTTCCGAATACAGAAA	+
LAFE	LAFE0H	LAFE0H13938g	LAFE0H13982g	LAFE0H13960s	1230649	1230656	ATCACCTG	1230657	1230819	ACTTACTTTAGTTTAAATTATTATATTCCATTTATATATTTTAATTTTTAAATATATTTAAAAGTTTTTTATTTGTTATGTTTTTTAGTTATTTACTACTTTTATCAAAAAAACATTTTTTGTTTTAGTAATTCTATAAAAGACTTCTTCCTTATTTAGTTTG	163	85.9	1230820	1230844	TGTTCTAGGTTTCCGAAATGTTAAA	+
LAME	LAME0A	LAME0A03774g	LAME0A03818g	LAME0A03796s	348489	348496	GTCACATG	348497	348588	ATATAGATAGCAAAGTTTAGTCTAATAATATATACTTTAACTATTAATATTTAATTTAAAACAAAAATTTACAGCTGCTTTTACAAAAAATG	92	82.6	348589	348613	TGGTTTTGCTTTCCGAAAACAAAAA	+
LAME	LAME0B	LAME0B03224g	LAME0B03268g	LAME0B03246s	343724	343717	ATCAGCTG	343716	343612	ACCCCTGTTTTATTTATGTTTTCTAACATTTATGTTTTATTTTTTAAAGTAAAATTTTATATTTAGCAAATGTTTTAAGAATGTATATAAAATTGTTTTTATTAT	105	84.8	343611	343587	TGTTTTTGTTTTCCGAACATTTTTG	-
LAME	LAME0C	LAME0C02718g	LAME0C02762g	LAME0C02740s	270489	270482	GTCATATG	270481	270390	ACATAGTTTTAGCAAAATAATTATTTTATTATACTTTATAATTCATACTATTAAAAACCGTCTATATTCTTTAGGTTTTATCCAATTTCTTG	92	80.4	270389	270365	TGGTTATGACTTCCGAAATAATTTT	-
LAME	LAME0D	LAME0D10484g	LAME0D10528g	LAME0D10506s	1056296	1056303	ATCAGGTG	1056304	1056397	ATTGTTGTTTTTACTTGTTTAGAATATTATGTAACTTTTTGTTTGTTTTAAAAATATTAATTGCTGTTTTTGTTTTTTAAATACATTTATAATT	94	85.1	1056398	1056422	TGTTTTTTGTGTCCGAAACAAATTT	+
LAME	LAME0E	LAME0E10264g	LAME0E10308g	LAME0E10286s	1005279	1005286	TTCACGTG	1005287	1005380	GTGCTTAAAGCATAAATTATTTCAAATTAACTTTTATATTGTTTTTAATTACAGTAATATCTTTTAAACGTTATATAAATTGTGTATTTAAAGC	94	81.9	1005381	1005405	TGGTTTTGTTTTCCGAACGGCTATT	+
LAME	LAME0F	LAME0F08240g	LAME0F08284g	LAME0F08262s	841480	841487	GTCATGTG	841488	841581	ATGTATAAGACCTTATTTTCTTAAATTAAGTTTTATTGTTATGCAAATTTATTTTTTAAAATCTTGGTTTTAGCTACAATTATAATTCTAAAGA	94	81.9	841582	841606	TATTTTATTTTTCCGAAAAAGTAAA	+
LAME	LAME0G	LAME0G15808g	LAME0G15852g	LAME0G15830s	1594680	1594673	ATCAGCTG	1594672	1594581	ATTAAAATAAACAACAGATTCTGATTTTAATTTCATACTTTAACTGTTTTATAATAAAAACATTTATGGTTTTATTATTTAAGTAACATTTG	92	83.7	1594580	1594556	TTGTTATAATTTCCGAAACTGTTTT	-
LAME	LAME0H	LAME0H04808g	LAME0H04852g	LAME0H04830s	488417	488424	GTCACATG	488425	488518	ATTGATTTTTATAAATTTTATCAATGTACAGAATAAATAAACATATATTAATGTTTAAATTATAGTTTTTAAAAATTGATCTTTTGAATTGTTA	94	87.2	488519	488543	TGTTTCAAGCGTCCGAAAAAAAAAC	+
LAMI	LAMI0A	LAMI0A05952g	LAMI0A05996g	LAMI0A05974s	555329	555336	ATCACGCT	555337	555419	TTAGCAAAAAAATATAAATTATTTTCTTTGTTTTTTTATAAATCATTAAAAGACTACTTAAAGAGAAAAATAAAATATAAGAT	83	86.7	555420	555444	TGTTCTTTGACTCCGAAGTTATAAA	+
LAMI	LAMI0B	LAMI0B07756g	LAMI0B07800g	LAMI0B07778s	672861	672868	GTCATGTG	672869	672951	ACTAACTCATTAAATTTTACAGATAAAAATATTTTCTAAATAGAGTTTTGATTAATTTTTAGAGAATAAAAACGTTTTTTAAC	83	83.1	672952	672976	AAGTTGTAATATCCGAAGTTAAAAT	+
LAMI	LAMI0C	LAMI0C07492g	LAMI0C07536g	LAMI0C07514s	673096	673103	ATCACGTG	673104	673186	GTTCACATTAATTGTTTTTTGTTAAATAAAAGCTCTTTAAATAACAGAAATTGGTTTTTTTCTTAAATTAATCATGAAAGTAA	83	80.7	673187	673211	TGTTTGTGAAGTCCGAAAATTATTT	+
LAMI	LAMI0D	LAMI0D05842g	LAMI0D05886g	LAMI0D05864s	498926	498933	ATCACGTT	498934	499016	TTATATCAGAAGTTTTGTTTTTTAAAAAATATATTTAATTTTATTTAGTTTTTACATTTGCATAGTAAATATCAAATAAAATA	83	88	499017	499041	TGTTTGTGGTTTCCGAAAGATTTTT	+
LAMI	LAMI0E	LAMI0E05688g	LAMI0E05732g	LAMI0E05710s	494374	494381	ATCACCTG	494382	494464	ACACATTAAAGTTTAAGTTCAGTAAATTAGTTTTTTATTATATTTCATTAAACTATGTTTTTAAATGTTTATGTACGTATTGT	83	81.9	494465	494489	TGTTTATGTTTTCCGAACTGTTTAA	+
LAMI	LAMI0F	LAMI0F12948g	LAMI0F12992g	LAMI0F12970s	1164701	1164708	ATCACGTG	1164709	1164790	CTAGCCGAAATATATTTTAACACTTTATTTGTTTCAACTAATTACATTGAACTTTTTTAACTTTAAATGTAAGTTTAATAAT	82	80.5	1164791	1164815	TGTAAACGTGTTCCGAAAGGGAAAA	+
LAMI	LAMI0G	LAMI0G03499r	LAMI0G03532g	LAMI0G03510s	304850	304843	GTCACGTG	304842	304761	CATATCTTGTTTTTTTTAGTTGTTGAGTACATTTGTTAGCTTTTAGCGTTGAAAAATAAATTGATTGTAAATGTTATTTTCA	82	76.8	304760	304736	GGTGTGCATTTTCCGAAACGAAAAT	-
LAMI	LAMI0H	LAMI0H09142g	LAMI0H09186g	LAMI0H09164s	791594	791601	ATCACGTT	791602	791686	TAAACATTTTTATACTAATTGTGTTACAACATATAATCAAATATATTTAAAATGTTTATAATTTTACTTGGATTCTTTATTTTTT	85	85.9	791687	791711	TGTGTTAAATATCCGAAAGGTAAAA	+
LANO	LANO0A	LANO0A06568g	LANO0A06612g	LANO0A06590s	623820	623827	ATCACATG	623828	623922	ACTACAAAATATTATGCTATATGTTTTAAACATTATTGTTTTTTGTATTTTTAGTAAAATACACATTATGTTTGAATATATTAAAAAATAACAGC	95	83.2	623923	623947	TGTTTATGGTTTCCGAAACTACTTT	+
LANO	LANO0B	LANO0B01926g	LANO0B01970g	LANO0B01948s	194644	194637	CTCAGCTG	194636	194544	ATCAGTCTGTATACTTTATGTAACTCTATTTTCCATAAATGTTAAAAAATAATATGCTCATGTTTTTATAAAAAATATAAACGGTTAAAATGT	93	79.6	194543	194519	TGTTTATGGCTTCCGAACTTTTAAT	-
LANO	LANO0C	LANO0C03554g	LANO0C03598g	LANO0C03576s	366910	366903	ATCAGGTG	366902	366808	GTAGTTTTTAGGCCAAAATCTTTTTTAATTTTTAAAATTATTCTTTTAAACTTTTTATATAGTATTACAAAGTATAAATATTTCAAATTTTAGGA	95	84.2	366807	366783	GGTGTAAGGTTTCCGAACTACATTT	-
LANO	LANO0D	LANO0D05600g	LANO0D05644g	LANO0D05622s	539711	539704	GTCATATG	539703	539611	ATACAAATTTAATAGGTTTTAGTAAATTTTTTTAATATTTAAACTATAAGCTACAAATTTTTAAATCCTTTTTTTAAAATTGCAATTTAAATG	93	86	539610	539586	TGTTTTAGTTTTCCGATTGTAAAAT	-
LANO	LANO0E	LANO0E14664g	LANO0E14708g	LANO0E14686s	1428232	1428239	GTCAGGTG	1428240	1428333	GCTCAGATAACTTAAGAAACAACATAAAAAAACAAAGTAAAAAAAGAGTAATTGTACATCTATATTTGTTAAAAAAGATTAAAAAATTTTAACA	94	80.9	1428334	1428358	TGTTTGAGTATTCCGAAAATACTTT	+
LANO	LANO0F	LANO0F06832g	LANO0F06876g	LANO0F06854s	646464	646471	GTCTCGTG	646472	646565	ATGCCAAAACCTTTTAAAAACAGTAACAATTTAAAAAATTAGCTGTTTAAAGTATTAACAAATTTATAGTACTTGTTTTTTTCTATAGATTTGA	94	79.8	646566	646590	AGTTTTTGATTTCCGAAGAAAGAAG	+
LANO	LANO0G	LANO0G14620g	LANO0G14664g	LANO0G14642s	1410069	1410076	TCCACGTG	1410077	1410179	AATCAAAAAAGCTAATTTTACTGTTTTATCTAAAACTGCTTGCTGTACAAAAACGTAAAAATAAATAATGGTTTTTAAACTATTAAGATCCCAGAAAAGGGAC	103	73.8	1410180	1410204	GGTTTTGGTGTTCCGAAAGCATTAA	+
LANO	LANO0H	LANO0H19438g	LANO0H19482g	LANO0H19460s	1809027	1809034	GTCACATG	1809035	1809127	TCTTAAAATAATAAAGTATTTGTTTTAATTACTCTTAAAGTAATTATAAATTTATAACTATGCTTTTTATATATTTTGTTTAAATAATTTTAT	93	89.2	1809128	1809152	TGTTAGCGGATTCCGAAGGCAAAAA	+
LAWA	LAWA0A	LAWA0A00958g	LAWA0A01002g	LAWA0A00980s	77686	77679	GTCAGGTG	77678	77586	ATCTTTTTATGTGTGAAAATAAAAAGAATATATAATCAATATAATTAATAAATTTTATGTTTATAAAATAATAAGTGTTTCGTTTGATAAGAG	93	84.9	77585	77561	TGTTTTTCCGTTCCGAACATATTAA	-
LAWA	LAWA0B	LAWA0B06304g	LAWA0B06348g	LAWA0B06326s	590183	590190	ATCATGTG	590191	590283	ATTAGAATTGTTACTTTATTAATAATAAAATAAACATATAAAATTATAATACAGTAAACAAACAAAATGTTTATGGTTTTTAATGAAAAACAA	93	86	590284	590308	AGTATAAGCTTTCCGAAACGATTTA	+
LAWA	LAWA0C	LAWA0C11430g	LAWA0C11474g	LAWA0C11452s	976822	976829	GTCACCTG	976830	976924	ATTGTAATATATAGTTTTTGTTTGAATTAACTCATAGTTTATAATTTTAAAAAATAATCTTTTAAATGTTATAAAAGCCATTATGTGTTAATAAG	95	84.2	976925	976949	TGTTTGAGACTTCCGAACAGAAATA	+
LAWA	LAWA0D	LAWA0D05094g	LAWA0D05138g	LAWA0D05116s	453662	453655	CTCACGTG	453654	453561	CAATTCGTTCCAAGCTTTTACTGTTTTTATATTTTACAATTTAAACAATTTAGAATTTTTAAATTTGTAACCTCCTATATTTTGAACATTTTTG	94	78.7	453560	453536	TGTTTGAAACTTCCGAATATAATTT	-
LAWA	LAWA0E	LAWA0E06282g	LAWA0E06326g	LAWA0E06304s	558822	558829	ATCACCTG	558830	558923	ATTACATATTACTACATATATATAAATATATATGAAAATAATTATACAAAAAACCAAACTTTACTATTTTAAAAATGTCAAAAAGTTTTTATGA	94	86.2	558924	558948	GGTTGATAGTTTCCGAACATTTTTT	+
LAWA	LAWA0F	LAWA0F06656g	LAWA0F06700g	LAWA0F06678s	587752	587759	GTCACCTG	587760	587852	ATTCTTATTTGTTACTTTTACATTTTTAATTAGTCAAATTTTGATTTTTTCTTAAACTCTTTTAAACATGTTCAAATTATGTAGATAAAATTG	93	82.8	587853	587877	TTTTTGAGCTTTCCGAACCAAAGTT	+
LAWA	LAWA0G	LAWA0G11122g	LAWA0G11166g	LAWA0G11144s	1026300	1026307	AAAACGTG	1026308	1026403	ATTACTTTCGACCGTAAAATTTTTGTAAAACGTTTTACAACTAAAATAATATCCCAAGAACAAAATAAATTAATTTGTCTTAATCATTATTATATT	96	80.2	1026404	1026428	TGTTTGTGAGTTCCGAACATATATA	+
LAWA	LAWA0H	LAWA0H10748g	LAWA0H10792g	LAWA0H10770s	941337	941344	CTCACCTG	941345	941449	ACCTAATAATATTACATATTTAAATTTATTATTTAAATTGTTAGTTATACTATTAAATAAAAAAATTTGTGGCTAAAATCCAAAGAAACATTTCAAGTGGCATGT	105	81	941450	941474	TATTTGCATTTTCCGAAATGATAAA	+
LAKL*	SAKL0A	SAKL0A08844g	SAKL0A08888g	SAKL0A08866s	777082	777089	ATCACGTG	777090	777252	ATTTATTAATAAAAGCTTTTGTATATTAAATTAATTATAATAATTATTTAAATGTTTTACAGTTATTTTATATTTTATATGCAATTTTAAAATATTTAAAAAATTTACTTATTAAATAAATAAAAATAAATATACTAGTATTTGTAAAATGTTTTAGTGTTTT	163	91	777253	777277	TGTTTTTGCTTTCCGAAATTATAAA	+
LAKL*	SAKL0B	SAKL0B02860g	SAKL0B02904g	SAKL0B02882s	272172	272179	ATCACGTG	272180	272342	AACTAAAAATACAAGATTTTACTTTTATAAAACCTTAAAATATATTTTAAACGTTGTTAAAAAATATTAAATGTAAATATTAATTATTTATATATTGTATATATTTAGTTTTCTTGTAAACTATAAACAAAAAATAGTATACAATGTATTTAAAAAAATGTTT	163	88	272343	272367	TGTTTGAGAATTCCGAAAAAAGAAA	+
LAKL*	SAKL0C	SAKL0C11176g	SAKL0C11220g	SAKL0C11198s	1009523	1009516	AGCACGTG	1009515	1009352	ATCAAAATTATTAGTTTTCAATGGCTTTAAAAGTTTTATTTTATTTTTGATTATATAAATAGTTCCTCTAAGCTAAATTATTTAGCTTTAAATAAATAAAAATATACTTCTTTAACTAGTTTTCTTAGTTTGTAAAACAATACATATTCTTGAAGAAATTTTTA	164	83	1009351	1009327	AGTTTTAGTTTTCCGAAAGTATTTA	-
LAKL*	SAKL0D	SAKL0D08844g	SAKL0D08888g	SAKL0D08866s	737092	737099	GTCACGTG	737100	737264	ATCTACTTTACTACTTTTATTTAATATTATTATTTTTAAAAAAATTTTAAATTTAATATAAACAAGTATGTAATATATTTTTTGTAAAATATAAATAAAAATATAAATCTACTGTAACTTAAATTATAAAGTATAAAATTATATTTAATATTTTATAAAAATAAT	165	92	737265	737289	ATTTTACGTATTCCGAAACATTTTT	+
LAKL*	SAKL0E	SAKL0E01408g	SAKL0E01452g	SAKL0E01430s	108420	108413	CTCACGTG	108412	108260	ATTTTTTTTATAAACAATTATAAAAAAAATTTATTTTATTTTACTTTTTAAAAAATATTAATATATTACAATTGTAAAAATTTTTTAATAGCACGCATTTTTATATTAAATATTAATTAACAGAAAAATTGTTTTTCTTTTAAAGCAATTTTA	153	90	108259	108235	AGTTTGTGCACTCCGAAACTTAAAA	-
LAKL*	SAKL0F	SAKL0F04774g	SAKL0F04818g	SAKL0F04796s	383306	383299	GCCACGTG	383298	383135	ATAAAAGTAAAAGTATTTATAAAAAGTTTATAATTTTAATTTTTTATTTTAAAAGTAACGTAAAATTTAAACTTTAATAATTTTTTAATAATATTAATAATATTTATAATTTATTTTTTAGCTTTTATAATATGTATAGTGTTTTTTAAAGTTTAATAATTTTT	164	92	383134	383110	TGTTTTTGATCTCCGAACACTTTAC	-
LAKL*	SAKL0G	SAKL0G12496g	SAKL0G12540g	SAKL0G12518s	1064569	1064562	GTCACATG	1064561	1064396	ATTTTAAAAACAAAATTTTTACAATAAAATATTTTTGTATTTTTTATTTAAAAATTTGTATATATTTTATAGTAGTTTGTACTTTATTTATTATTTTTGTTAATTTTGCTATATACTATTAAAAATTTTTTATTTTAAAAGTTTTGTAAAATCTTTAAGTTTTTTT	166	90	1064395	1064371	ATTATATGAGTTCCGAAAGCTAGAT	-
LAKL*	SAKL0H	SAKL0H22572g	SAKL0H22594g	SAKL0H22583s	1963599	1963606	CTCACGTG	1963607	1963771	ACAATAAAAAAAATTATAATTTTAACTATAGAAATTATTTTATACTTTTAAATACTTTATTAAAATTTTTTAAAAATAATATAATTAAATTTAATTATAAAATATTGATTTATTTAAAAATTAACTTTTATTTAAAATATAAATTAATGCTTTAATAAAAATTAG	165	94	1963772	1963796	AGTTTTTGTATTCCGAAAAATTTTT	-
LATH*	KLTH0A	KLTH0A02134g	KLTH0A02178g	KLTH0A02156s	186515	186508	GTCACCTG	186507	186404	ATAGACCTGAGTGCATTTTATATATATATATTACTTTCTCTTTTGAATTTAAACTTTATCTATAAAAGTAATAACATTTTTGCTTTTGCTACTATAAAAATATG	104	80	186403	186379	TGTTAGTGGCTTCCGAAAATATTTA	-
LATH*	KLTH0B	KLTH0B03014g	KLTH0B03058g	KLTH0B03036s	238312	238305	CACACGTG	238304	238212	ATCTACAACTTAAGAGATCTATAAATTTATTTTTTATAACTTGCATTTATAGCTACTATAAGCGCAAGTATTCAAGCTTGTAAAATAAAGTAA	93	76	238211	238187	TGTTTATCAGTTCCGAACGCAAAAA	-
LATH*	KLTH0C	KLTH0C11066g	KLTH0C11110g	KLTH0C11088s	912837	912844	ATCAGCTG	912845	912939	ATCCAAATTATTAAAATATTTTTTTATTTTCTATTTAAGTTGTATTATTTTTATATTTTATATGCAATTAAGATTAGGAAAGCTGTTTATTAAAT	95	86	912940	912964	TGTATATGGGTTCCGAAGACACAAT	+
LATH*	KLTH0D	KLTH0D06314g	KLTH0D06358g	KLTH0D06336s	555337	555344	GTCACCTG	555345	555438	ATGTATTTTGCTTCAAAATAGCAGACTATTTTTTAGTTTCAAAAAACTTTTTATTATAATATGTTTTTTATTAGTTGTTCTTTTATTTTAATAT	94	84	555439	555463	ATTATTTGTTTTCCGAAACATTAAA	+
LATH*	KLTH0E	KLTH0E08294g	KLTH0E08338g	KLTH0E08316s	761047	761040	ATCACCTG	761039	760946	ATGTAAAAAGCCAGTTTTTATGTTTTTATAAGCTAAAAATTAACATGGATTTTTTTAATGTGCAATGGCATCTTTAGCTATATAGAATTTGCAT	94	76	760945	760921	ATTCTGCGGTTTCCGAACATTTATT	-
LATH*	KLTH0F	KLTH0F13046g	KLTH0F13090g	KLTH0F13068s	1078717	1078724	ACCACGTG	1078725	1078817	ATATAGAATCAGAATTTTAGTAACAAAAAGAATACAATATTTACTAAAATATTTTATATTAATGATGTTTTTGATTAAAGTTTTAGAAAGCTT	93	84	1078818	1078842	TATGCTTGTTTTCCGAAAATATTTT	+
LATH*	KLTH0G	KLTH0G16434g	KLTH0G16478g	KLTH0G16456s	1432769	1432776	ATCATATG	1432777	1432877	GTCATCTGACTTTAATTTTATTATTTTTGAAAATAAACTTCAGTGTATTCCAAAAAAAATGTATAACAGTAAAATTAATATACTTTTGAAAATTATTTATG	101	82	1432878	1432902	TGATTATGAGCTCCGAAATATTTAA	+
LATH*	KLTH0H	KLTH0H12474g	KLTH0H12518g	KLTH0H12496s	1062917	1062924	CGCACGTG	1062925	1063018	GTACGCTCCATTTTTTTTTTTGAATTTTACGTCAAATATGAGCACAAAAATAGATACAAAAGTGTTATAATAAAGAAAAATTTGGAATAGTTAA	95	76	1063019	1063043	CTGCTAAGTGTTCCGAAACAAGTTT	+
*Souciet J-L et al. 2009. Comparative genomics of protoploid Saccharomycetaceae. Genome Res. 19:1696–1709. doi: 10.1101/gr.091546.109.

## Sheet: Table S2
Species	size (Mb)	# chr	GC%	# CDS	# CDS with introns	% CDS with introns	# pseudogenes	# gene families	# CDS in families	# singletons	# HGTb	# DNA transposonsc	# Retrotransposons	# solo LTR	# tRNA	rDNA locus
L. fantastica	11.34	7	44.5	5060	325	6.4	90	4675	5015	45	1	41	1	0	201	chr 0G: 1491087..1508693
L. meyersii	11.26	8	45.3	4997	324	6.4	91	4650	4963	34	1	15	0	0	208	chr 0E: 1068589..1085334
L. dasiensis	10.70	8	45.1	5099	322	6.3	63	4675	5045	54	5	6	4	0	204	chr 0H: 1515576..1531029
L. nothofagi	11.31	8	43.7	5153	332	6.3	101	4736	5084	69	4	11	4	0	204	chr 0G: 1472319..1487046
L. thermotolerans	10.40	8	47.3	5177	328	6.3	71	4747	5085	92	0	12	3	59	229	chr 0H: 1127814..1153273
L. waltii	10.24	8	45.1	4768	315	6.3	295a	4431	4732	36	1	18	13	90	217	chr 0H: 9969971..997001
L. mirantina	10.12	8	45.1	5057	316	6.2	53	4666	5011	46	1	30	3	0	205	chr 0H: 1606633..1621383
L. fermentati	10.26	8	42.5	5233	333	6.3	102	4770	5171	62	1	1	17	45	203	chr 0H: 583738..597949
L. cidri	10.15	8	41.2	5188	340	6.5	52	4716	5171	17	1	1	0	0	193	chr 0H: 866843..881207
L. kluyveri	11.35	8	41.5	5378	357	6.5	100	4822	5202	176	1	8	10	203	258	chr 0H: 1220796..1241674
a overestimated due to numerous gaps in the genome sequence
b # of species specific HGT and gene creation, all other events that arose along internal branches of the tree are represented in Fig2
c all DNA transposons correspond to Rover elements, see Sarilar et al., Genome Biology & Evolution 2015

## Sheet: Table S3
Species	Accession number	Source
Saccharomyces cerevisiae*	version 22-NOV-2011	http://www.yeastgenome.org/
Saccharomyces mikatae	-	http://www.SaccharomycesSensuStricto.org
Saccharomyces kudriavzevii	PRJNA1442	http://www.ncbi.nlm.nih.gov/
Saccharomyces uvarum	-	http://www.SaccharomycesSensuStricto.org
Candida nivariensis*	PRJEB148	http://www.ncbi.nlm.nih.gov/
Nakaseomyces delphensis*	PRJEB150	http://www.ncbi.nlm.nih.gov/
Candida bracarensis*	PRJEB145	http://www.ncbi.nlm.nih.gov/
Candida glabrata*	PRJNA12376	http://www.ncbi.nlm.nih.gov/
Nakaseomyces bacillisporus*	PRJEB149	http://www.ncbi.nlm.nih.gov/
Candida castelli*	PRJEB147	http://www.ncbi.nlm.nih.gov/
Naumovozyma castellii*	PRJNA79343	http://www.ncbi.nlm.nih.gov/
Naumovozyma dairenensis	PRJNA79341	http://www.ncbi.nlm.nih.gov/
Kazachstania africana	PRJNA178246	http://www.ncbi.nlm.nih.gov/
Kazachstania naganishii*	PRJEA70969	http://www.ncbi.nlm.nih.gov/
Vanderwaltozyma polyspora	PRJNA20539	http://www.ncbi.nlm.nih.gov/
Tetrapisispora phaffii	PRJEA70965	http://www.ncbi.nlm.nih.gov/
Zygosaccharomyces rouxii*	PRJNA12502	http://www.ncbi.nlm.nih.gov/
Zygosaccharomyces bailii*	PRJEB1908	http://www.ncbi.nlm.nih.gov/
Torulaspora delbrueckii	PRJNA79345	http://www.ncbi.nlm.nih.gov/
Lachancea fantastica*	PRJEB12929	http://www.ebi.ac.uk/ena
Lachancea meyersii*	PRJEB12931	http://www.ebi.ac.uk/ena
Lachancea dasiensis*	PRJEB12928	http://www.ebi.ac.uk/ena
Lachancea nothofagi*	PRJEB12933	http://www.ebi.ac.uk/ena
Lachancea thermotolerans*	CU928165, CU928166, CU928167, CU928168, CU928169, CU928170, CU928171, CU9 28180	http://www.ebi.ac.uk/ena
Lachancea waltii	-	http://gryc.inra.fr
Lachancea mirantina*	PRJEB12932	http://www.ebi.ac.uk/ena
Lachancea fermentati*	PRJEB12930	http://www.ebi.ac.uk/ena
Lachancea cidri*	PRJEB12910	http://www.ebi.ac.uk/ena
Lachancea kluyveri*	AACE03000000	http://www.ncbi.nlm.nih.gov/
Kluyveromyces lactis*	PRJNA12377	http://www.ncbi.nlm.nih.gov/
Kluyveromyces marxianus	PRJDA65233	http://www.ncbi.nlm.nih.gov/
Eremothecium gossypii*	PRJNA10623	http://www.ncbi.nlm.nih.gov/
Eremothecium aceri	PRJNA39551	http://www.ncbi.nlm.nih.gov/
Eremothecium cymbalariae	PRJNA60715	http://www.ncbi.nlm.nih.gov/
Candida tropicalis	GG692395	http://www.ncbi.nlm.nih.gov/
Candida albicans*	A21-s02-m01-r15	http://www.candidagenome.org
* also available at gryc.inra.fr

## Sheet: Table S4
Family ID	Positiona	# CDS	mean CDS size (nt)	Putative origin (best hit)	Putative donor species	Best hit descriptionb	best hit ID
4591	b4	4	1257	Pezizomycotina	Byssochlamys spectabilis No. 5	hypothetical protein SNOG_13222	dbj|GAD96285.1|
4598	b4	6	921	Pezizomycotina	Botrytis cinerea T4	similar to alcohol dehydrogenase	emb|CCD48167.1|
4751	b5	5	831	Pezizomycotina	Botrytis cinerea T4	Polysaccharide Lyase family 3 protein	emb|CCD50884.1|
5026	L. dasiensis	1	597	Pezizomycotina	Trichoderma atroviride IMI 206040	Glutathione-dependent formaldehyde-activating enzyme.	gb|EHK40241.1|
5027	L. dasiensis	1	1836	Pezizomycotina	Nectria haematococca mpVI 77-13-4	Predicted aconitase	ref|XP_003045775.1|
5042	L. dasiensis	1p	1323	Pezizomycotina	Penicillium roqueforti FM164	Aromatic-ring hydroxylase-like	emb|CDM29114.1|
5104	L. fantastica	1	1365	Pezizomycotina	Trichoderma virens Gv29-8	Transferase	gb|EHK19636.1|
5151	L. fermentati	1	708	Pezizomycotina	Exophiala dermatitidis NIH/UT8656	hypothetical protein HMPREF1120_08571	gb|EHY60618.1|
5343	L. meyersii	1	900	Pezizomycotina	Trichoderma atroviride IMI 206040	hypothetical protein TRIATDRAFT_299952	gb|EHK45263.1|
5419	L. nothofagi	1	546	Pezizomycotina	Aspergillus fumigatus var. RP-2014	acetyltransferase GNAT	gb|KEY76459.1|
5451	L. nothofagi	1lc	297	Hymenoptera	Harpegnathos saltator	hypothetical protein EAI_15107	gb|EFN85589.1|
5472	L. nothofagi	1lc	678	Hymenoptera	Camponotus floridanus	hypothetical protein EAG_04754	gb|EFN70779.1|
165	b2	10	1209	Oomycetes	Aphanomyces invadans	DDE superfamily endonuclease	ref|XP_008869481.1|
4679	b4	6	663	Actinobacteria	Streptacidiphilus jeojiense	hypothetical protein	ref|WP_030248487.1|
4681	L. kluyveri	6*	762	Cyanobacteria	Scytonema hofmanni	Serine recombinase	ref|WP_017744221.1|
4403	b2	9	789	Firmicutes	Bacillus licheniformis	Domain of unknown function (DUF1963)	ref|WP_020453191.1|
4595	b2	6	582	a-proteobacteria	Gluconobacter thailandicus	protease	ref|WP_007282635.1|
5039	L. dasiensis	1	1092	a-proteobacteria	Methylobacterium sp. 285MFTsu5.1	Dehydratase	ref|WP_026605433.1|
5386	L. mirantina	1p	969	a-proteobacteria	Gluconobacter morbifer	hypothetical protein	ref|WP_008851272.1|
5066	L. dasiensis	1	1191	d-proteobacteria	Myxococcus sp. (contaminant ex DSM 436)	D-alanine--D-alanine ligase	ref|WP_002636457.1|
4880	b7	3	1602	g-proteobacteria	Rhodanobacter sp. 115	3,4-dichlorophenol 6-monooxygenase	ref|WP_008212245.1|
5004	L. cidri	1	1155	g-proteobacteria	Acinetobacter baumannii	amidohydrolase	ref|WP_000053021.1|
5586	L. waltii	1	519	g-proteobacteria	Acinetobacter baumannii 573719	hypothetical protein J658_4033	gb|EXS20553.1|
5429	L. nothofagi	1p	465	g-proteobacteria	Pseudomonas sp. GM25	transcriptional regulator	ref|WP_007958920.1|
a: Proposed phylogenetic position of HGT within the Lachancea tree as in Fig2
b: If best hit has no description, the description of the PFAM conserved domain is given in italics
*: already described in Rolland et al., 2009
p: pseudogene
lc: CDS with low complexity sequence

## Sheet: Table S5
Fam_id	Gene_name	Fam_size	GC%	CDS_length	Position_in_tree	CAI	dN	dS	dN/dS
86	KLTH0B05060g	25	0.4111	1299	b4	0.096579164	NA	NA	NA
86	KLTH0E03366pg	25	0.4042	1185	b4	0.09535604	NA	NA	NA
86	KLTH0E14938g	25	0.4153	1293	b4	0.094388366	NA	NA	NA
86	KLTH0F09427pg	25	0.4489	675	b4	0.07610503	NA	NA	NA
86	KLTH0H00484pg	25	0.4136	1296	b4	0.09229777	NA	NA	NA
86	LAFA0B01178g	25	0.4213	1251	b4	0.124781825	NA	NA	NA
86	LAFA0C03664g	25	0.4221	1251	b4	0.1256493	NA	NA	NA
86	LAFA0D00166g	25	0.4173	1251	b4	0.10661562	NA	NA	NA
86	LAFA0D07844g	25	0.416	1173	b4	0.120961726	NA	NA	NA
86	LAFA0F09692g	25	0.4178	1077	b4	0.11902159	NA	NA	NA
86	LAFA0F21594g	25	0.4221	1251	b4	0.1255111	NA	NA	NA
86	LAFA0F22628g	25	0.4361	1275	b4	0.14106537	NA	NA	NA
86	LAFA0G01618g	25	0.4221	1251	b4	0.12463234	NA	NA	NA
86	LAFA0G12530g	25	0.4229	1251	b4	0.12428613	NA	NA	NA
86	LAME0A00408g	25	0.4657	642	b4	0.112720564	NA	NA	NA
86	LAME0D10968g	25	0.4315	723	b4	0.12846471	NA	NA	NA
86	LAME0E11144g	25	0.4516	1125	b4	0.10975145	NA	NA	NA
86	LAMI0C07954g	25	0.4333	540	b4	0.1508121	NA	NA	NA
86	LAMI0E10550g	25	0.451	1377	b4	0.17351271	NA	NA	NA
86	LAMI0G13410g	25	0.4184	1281	b4	0.15569721	NA	NA	NA
86	LAMI0G15280g	25	0.4392	1209	b4	0.15462442	NA	NA	NA
86	LAMI0H04104g	25	0.5176	624	b4	0.15681778	NA	NA	NA
86	LANO0C03070g	25	0.4339	567	b4	0.16162525	NA	NA	NA
86	LAWA0G09142g	25	0.4061	1251	b4	0.09778876	NA	NA	NA
86	LAWA0H00848g	25	0.433	783	b4	0.09993726	NA	NA	NA
4198	KLTH0C01012g	10	0.5291	1134	b1	0.09790543	0.6333588235	2.4619647059	NA
4198	LACI0C00716g	10	0.4753	930	b1	0.13919204	0.6333588235	2.4619647059	NA
4198	LADA0H20010g	10	0.469	870	b1	0.104875594	0.6333588235	2.4619647059	NA
4198	LAFA0F21792g	10	0.4774	819	b1	0.12222396	0.6333588235	2.4619647059	NA
4198	LAFE0C13190g	10	0.6593	816	b1	0.04412066	0.6333588235	2.4619647059	NA
4198	LAME0E00804g	10	0.4879	828	b1	0.09304737	0.6333588235	2.4619647059	NA
4198	LAMI0A04786g	10	0.5217	738	b1	0.14065935	0.6333588235	2.4619647059	NA
4198	LANO0F16908g	10	0.4651	918	b1	0.1370792	0.6333588235	2.4619647059	NA
4198	LAWA0H01398g	10	0.4679	840	b1	0.09370047	0.6333588235	2.4619647059	NA
4198	SAKL0G19272g	10	0.4574	903	b1	0.08950033	0.6333588235	2.4619647059	NA
4245	KLTH0C02772g	10	0.546	489	b1	0.09879778	0.4572111111	2.0092333333	NA
4245	LACI0D07426g	10	0.4565	471	b1	0.121700235	0.4572111111	2.0092333333	NA
4245	LADA0B02652g	10	0.5188	480	b1	0.091285996	0.4572111111	2.0092333333	NA
4245	LAFA0E03532g	10	0.498	492	b1	0.12624972	0.4572111111	2.0092333333	NA
4245	LAFE0C11584g	10	0.5748	468	b1	0.071316764	0.4572111111	2.0092333333	NA
4245	LAME0D04566g	10	0.4739	498	b1	0.15258542	0.4572111111	2.0092333333	NA
4245	LAMI0G03378g	10	0.4921	441	b1	0.117121235	0.4572111111	2.0092333333	NA
4245	LANO0F15214g	10	0.4675	477	b1	0.148404	0.4572111111	2.0092333333	NA
4245	LAWA0F01838g	10	0.5264	492	b1	0.12743787	0.4572111111	2.0092333333	NA
4245	SAKL0D12474g	10	0.4311	573	b1	0.058922917	0.4572111111	2.0092333333	NA
4337	KLTH0D09570g	10	0.5439	228	b1	0.53539044	0.1139578947	1.4214605263	NA
4337	LACI0G08680g	10	0.3951	243	b1	0.19125399	0.1139578947	1.4214605263	NA
4337	LADA0C08504g	10	0.5	228	b1	0.4253986	0.1139578947	1.4214605263	NA
4337	LAFA0E17876g	10	0.4912	228	b1	0.38491723	0.1139578947	1.4214605263	NA
4337	LAFE0G10484g	10	0.4774	243	b1	0.32247236	0.1139578947	1.4214605263	NA
4337	LAME0H13278g	10	0.4781	228	b1	0.360109	0.1139578947	1.4214605263	NA
4337	LAMI0C09934g	10	0.4715	246	b1	0.4292708	0.1139578947	1.4214605263	NA
4337	LANO0H14070g	10	0.4693	228	b1	0.36702153	0.1139578947	1.4214605263	NA
4337	LAWA0E09252g	10	0.4868	228	b1	0.29513547	0.1139578947	1.4214605263	NA
4337	SAKL0H08360g	10	0.4403	243	b1	0.200381	0.1139578947	1.4214605263	NA
4353	KLTH0D01650g	10	0.6302	192	b1	0.3023194	0.2588086957	1.7567434783	NA
4353	LACI0G17722g	10	0.4646	198	b1	0.18044637	0.2588086957	1.7567434783	NA
4353	LADA0F07844g	10	0.4392	189	b1	0.16203599	0.2588086957	1.7567434783	NA
4353	LAFA0C09428g	10	0.4531	192	b1	0.14824651	0.2588086957	1.7567434783	NA
4353	LAFE0D11650g	10	0.5423	201	b1	0.10718615	0.2588086957	1.7567434783	NA
4353	LAME0B01486g	10	0.5104	192	b1	0.19609943	0.2588086957	1.7567434783	NA
4353	LAMI0F05952g	10	0.5625	192	b1	0.22435756	0.2588086957	1.7567434783	NA
4353	LANO0C01618g	10	0.4815	189	b1	0.18268698	0.2588086957	1.7567434783	NA
4353	LAWA0E01596g	10	0.5556	189	b1	0.19848186	0.2588086957	1.7567434783	NA
4353	SAKL0B10714g	10	0.4948	192	b1	0.2045898	0.2588086957	1.7567434783	NA
4357	KLTH0H05412g	10	0.4671	852	b1	0.07712305	0.8461525	2.002875	NA
4357	LACI0G20186g	10	0.395	876	b1	0.112204425	0.8461525	2.002875	NA
4357	LADA0B02894g	10	0.4284	852	b1	0.10834672	0.8461525	2.002875	NA
4357	LAFA0C03136g	10	0.466	867	b1	0.134605	0.8461525	2.002875	NA
4357	LAFE0C05820g	10	0.388	897	b1	0.07583306	0.8461525	2.002875	NA
4357	LAME0C08306g	10	0.4534	858	b1	0.12528138	0.8461525	2.002875	NA
4357	LAMI0F07734g	10	0.4534	966	b1	0.15969604	0.8461525	2.002875	NA
4357	LANO0F01442g	10	0.4429	876	b1	0.1135751	0.8461525	2.002875	NA
4357	LAWA0H04192g	10	0.4409	855	b1	0.11246685	0.8461525	2.002875	NA
4357	SAKL0A05786g	10	0.4	1005	b1	0.06452702	0.8461525	2.002875	NA
4367	KLTH0B04532g	10	0.6877	333	b1	0.11730644	0.6085461538	2.0618384615	NA
4367	LACI0H04808g	10	0.5268	336	b1	0.12994619	0.6085461538	2.0618384615	NA
4367	LADA0D09032g	10	0.4964	276	b1	0.103085205	0.6085461538	2.0618384615	NA
4367	LAFA0B03796g	10	0.4746	276	b1	0.13102238	0.6085461538	2.0618384615	NA
4367	LAFE0H01332g	10	0.6488	336	b1	0.04002869	0.6085461538	2.0618384615	NA
4367	LAME0C04126g	10	0.5181	276	b1	0.16124788	0.6085461538	2.0618384615	NA
4367	LAMI0E00848g	10	0.6116	345	b1	0.13618836	0.6085461538	2.0618384615	NA
4367	LANO0E13300g	10	0.4312	276	b1	0.23453891	0.6085461538	2.0618384615	NA
4367	LAWA0C09956g	10	0.5158	285	b1	0.108271465	0.6085461538	2.0618384615	NA
4367	SAKL0H02508g	10	0.4315	489	b1	0.11769125	0.6085461538	2.0618384615	NA
4391	KLTH0D08118g	10	0.5229	918	b1	0.10272046	0.8058641026	1.8459205128	NA
4391	LACI0H18690g	10	0.3981	972	b1	0.13974386	0.8058641026	1.8459205128	NA
4391	LADA0G12904g	10	0.4532	951	b1	0.13793322	0.8058641026	1.8459205128	NA
4391	LAFA0F07052g	10	0.4717	954	b1	0.16784093	0.8058641026	1.8459205128	NA
4391	LAFE0H15434g	10	0.4448	969	b1	0.09362234	0.8058641026	1.8459205128	NA
4391	LAME0G14334g	10	0.4706	954	b1	0.15631364	0.8058641026	1.8459205128	NA
4391	LAMI0C10814g	10	0.4475	876	b1	0.22800937	0.8058641026	1.8459205128	NA
4391	LANO0D04126g	10	0.4665	954	b1	0.14587276	0.8058641026	1.8459205128	NA
4391	LAWA0E07866g	10	0.4419	921	b1	0.13893583	0.8058641026	1.8459205128	NA
4391	SAKL0D13662g	10	0.3859	1047	b1	0.09948694	0.8058641026	1.8459205128	NA
4429	KLTH0G04906g	9	0.4792	240	b2	0.058600813	0.3887727273	1.8813863636	NA
4429	LACI0C05380g	9	0.4323	192	b2	0.064891174	0.3887727273	1.8813863636	NA
4429	LADA0G07954g	9	0.4815	243	b2	0.07824645	0.3887727273	1.8813863636	NA
4429	LAFA0E14048g	9	0.4115	243	b2	0.06427937	0.3887727273	1.8813863636	NA
4429	LAFE0F13828g	9	0.4418	249	b2	0.059915707	0.3887727273	1.8813863636	NA
4429	LAME0H11342g	9	0.3966	237	b2	0.06677221	0.3887727273	1.8813863636	NA
4429	LAMI0G10792g	9	0.428	264	b2	0.11749643	0.3887727273	1.8813863636	NA
4429	LANO0H11914g	9	0.4733	243	b2	0.09934178	0.3887727273	1.8813863636	NA
4429	LAWA0D09098g	9	0.4365	252	b2	0.07816551	0.3887727273	1.8813863636	NA
4437	KLTH0G18260g	9	0.525	240	b2	0.11665565	0.47636	1.831372	NA
4437	LACI0D04500g	9	0.3792	240	b2	0.105154365	0.47636	1.831372	NA
4437	LADA0C11166g	9	0.45	240	b2	0.10373666	0.47636	1.831372	NA
4437	LAFA0A01398g	9	0.5125	240	b2	0.067975536	0.47636	1.831372	NA
4437	LAFE0B08658g	9	0.4042	240	b2	0.08300058	0.47636	1.831372	NA
4437	LAME0A06920g	9	0.4875	240	b2	0.1384184	0.47636	1.831372	NA
4437	LAMI0G16600g	9	0.4196	255	b2	0.16032168	0.47636	1.831372	NA
4437	LANO0D09890g	9	0.4431	255	b2	0.13355482	0.47636	1.831372	NA
4437	LAWA0H02916g	9	0.4797	246	b2	0.07163663	0.47636	1.831372	NA
4473	KLTH0F17006g	9	0.5806	546	b2	0.08615512	0.6811566667	1.7953333333	NA
4473	LACI0H23750g	9	0.4848	495	b2	0.12618585	0.6811566667	1.7953333333	NA
4473	LADA0A02146g	9	0.5562	552	b2	0.081615284	0.6811566667	1.7953333333	NA
4473	LAFA0D15456g	9	0.5681	558	b2	0.110719554	0.6811566667	1.7953333333	NA
4473	LAFE0F02388g	9	0.5813	492	b2	0.06254241	0.6811566667	1.7953333333	NA
4473	LAME0D02036g	9	0.5981	627	b2	0.12661129	0.6811566667	1.7953333333	NA
4473	LAMI0E12860g	9	0.593	543	b2	0.1524183	0.6811566667	1.7953333333	NA
4473	LANO0H23178g	9	0.5197	558	b2	0.082788534	0.6811566667	1.7953333333	NA
4473	LAWA0B10088g	9	0.5172	495	b2	0.101327725	0.6811566667	1.7953333333	NA
4484	KLTH0E08976g	8	0.5263	285	b1	0.06400984	NA	NA	NA
4484	LACI0B02586g	8	0.4545	132	b1	0.06599481	NA	NA	NA
4484	LADA0E01838g	8	0.5	312	b1	0.060877047	NA	NA	NA
4484	LAFE0C10220g	8	0.4468	282	b1	0.055228945	NA	NA	NA
4484	LAME0F18140g	8	0.5067	225	b1	0.054253142	NA	NA	NA
4484	LAMI0G00386g	8	0.4826	288	b1	0.08842089	NA	NA	NA
4484	LANO0H02432g	8	0.4783	138	b1	0.05701302	NA	NA	NA
4484	SAKL0E04323pg	8	0.4683	252	b1	0.04070705	NA	NA	NA
4492	KLTH0F07238g	8	0.5403	657	b2	0.1265641	0.5995210526	2.3359	NA
4492	LACI0D06392g	8	0.4109	567	b2	0.1514523	0.5995210526	2.3359	NA
4492	LADA0H10946g	8	0.4896	768	b2	0.10821273	0.5995210526	2.3359	NA
4492	LAFA0G06766g	8	0.4889	765	b2	0.16111131	0.5995210526	2.3359	NA
4492	LAME0G06612g	8	0.5396	795	b2	0.09385621	0.5995210526	2.3359	NA
4492	LAMI0H03290g	8	0.4376	633	b2	0.14955936	0.5995210526	2.3359	NA
4492	LANO0G06678g	8	0.4823	678	b2	0.16345073	0.5995210526	2.3359	NA
4492	LAWA0C07052g	8	0.493	639	b2	0.08959918	0.5995210526	2.3359	NA
4556	KLTH0E09636g	7	0.5748	381	b1	0.11177901	0.4294333333	1.8791111111	NA
4556	LADA0D07404g	7	0.5282	354	b1	0.10930607	0.4294333333	1.8791111111	NA
4556	LAFA0E09318g	7	0.5253	474	b1	0.18776514	0.4294333333	1.8791111111	NA
4556	LAME0H06590g	7	0.5833	348	b1	0.15482184	0.4294333333	1.8791111111	NA
4556	LANO0E11694g	7	0.5207	363	b1	0.108019434	0.4294333333	1.8791111111	NA
4556	LAWA0D06392g	7	0.5385	351	b1	0.0995086	0.4294333333	1.8791111111	NA
4556	SAKL0E04939g	7	0.4798	744	b1	0.064502805	0.4294333333	1.8791111111	NA
4560	KLTH0G09966g	7	0.5026	390	b1	0.06364029	0.6084384615	2.0174692308	NA
4560	LADA0E10550g	7	0.4604	417	b1	0.10057955	0.6084384615	2.0174692308	NA
4560	LAFA0E21198g	7	0.455	411	b1	0.104964234	0.6084384615	2.0174692308	NA
4560	LAME0G13124g	7	0.5025	402	b1	0.08088329	0.6084384615	2.0174692308	NA
4560	LANO0H07030g	7	0.437	405	b1	0.07348997	0.6084384615	2.0174692308	NA
4560	LAWA0G10220g	7	0.4453	393	b1	0.049475126	0.6084384615	2.0174692308	NA
4560	SAKL0E08140g	7	0.4267	300	b1	0.08720758	0.6084384615	2.0174692308	NA
4592	KLTH0E02794g	7	0.4912	906	b1	0.094592676	1.06254375	2.27875	NA
4592	LADA0F12200g	7	0.4332	681	b1	0.10557825	1.06254375	2.27875	NA
4592	LAFA0G17942g	7	0.4131	852	b1	0.10860992	1.06254375	2.27875	NA
4592	LAME0G18426g	7	0.4245	867	b1	0.103464074	1.06254375	2.27875	NA
4592	LANO0B04874g	7	0.4478	804	b1	0.11492247	1.06254375	2.27875	NA
4592	LAWA0B02564g	7	0.4455	918	b1	0.084576845	1.06254375	2.27875	NA
4592	SAKL0G07700g	7	0.3797	1272	b1	0.08985848	1.06254375	2.27875	NA
4617	KLTH0A04081g	6	0.5766	111	b5	0.14943275	0.19215	1.2223214286	NA
4617	LADA0A05391g	6	0.5315	111	b5	0.11764714	0.19215	1.2223214286	NA
4617	LAFA0A06359g	6	0.4167	120	b5	0.13248156	0.19215	1.2223214286	NA
4617	LAME0A02003g	6	0.4865	111	b5	0.17205852	0.19215	1.2223214286	NA
4617	LANO0B03697g	6	0.5315	111	b5	0.18932886	0.19215	1.2223214286	NA
4617	LAWA0G14081g	6	0.4414	111	b5	0.098880336	0.19215	1.2223214286	NA
4620	KLTH0A03124g	6	0.5736	591	b5	0.10261736	0.6874090909	2.1894545455	NA
4620	LADA0A06260g	6	0.4853	612	b5	0.10453561	0.6874090909	2.1894545455	NA
4620	LAFA0A05490g	6	0.4951	711	b5	0.099345095	0.6874090909	2.1894545455	NA
4620	LAME0A02894g	6	0.5066	831	b5	0.1699493	0.6874090909	2.1894545455	NA
4620	LANO0B02828g	6	0.4733	693	b5	0.109765954	0.6874090909	2.1894545455	NA
4620	LAWA0D07052g	6	0.4973	561	b5	0.113444865	0.6874090909	2.1894545455	NA
4663	KLTH0H03432g	6	0.6643	426	b5	0.19551194	0.3505333333	2.1087666667	NA
4663	LADA0F12376g	6	0.5408	429	b5	0.1480122	0.3505333333	2.1087666667	NA
4663	LAFA0G21352g	6	0.5405	420	b5	0.3252969	0.3505333333	2.1087666667	NA
4663	LAME0B04940g	6	0.5473	444	b5	0.31502703	0.3505333333	2.1087666667	NA
4663	LANO0E03378g	6	0.551	441	b5	0.30886406	0.3505333333	2.1087666667	NA
4663	LAWA0A09824g	6	0.5823	474	b5	0.16720119	0.3505333333	2.1087666667	NA
4664	KLTH0A05456g	6	0.672	372	b5	0.1610584	0.3221571429	1.7974714286	NA
4664	LADA0B06436g	6	0.5123	324	b5	0.20733745	0.3221571429	1.7974714286	NA
4664	LAFA0F05644g	6	0.5652	345	b5	0.1909271	0.3221571429	1.7974714286	NA
4664	LAME0H13982g	6	0.5655	336	b5	0.15678689	0.3221571429	1.7974714286	NA
4664	LANO0B08834g	6	0.4838	339	b5	0.108725965	0.3221571429	1.7974714286	NA
4664	LAWA0G15390g	6	0.6	360	b5	0.16094612	0.3221571429	1.7974714286	NA
4672	KLTH0B06259g	6	0.5984	615	b5	0.09573509	0.7265285714	1.6018642857	NA
4672	LADA0E02454g	6	0.609	642	b5	0.0974635	0.7265285714	1.6018642857	NA
4672	LAFA0F11100g	6	0.483	528	b5	0.08734542	0.7265285714	1.6018642857	NA
4672	LAME0F17458g	6	0.5902	510	b5	0.082325354	0.7265285714	1.6018642857	NA
4672	LANO0H03048g	6	0.6243	567	b5	0.10211207	0.7265285714	1.6018642857	NA
4672	LAWA0C08350g	6	0.5491	570	b5	0.12578636	0.7265285714	1.6018642857	NA
4709	KLTH0C11374g	5	0.4612	618	b5	0.09257122	0.8433428571	2.0894857143	NA
4709	LAFA0B07712g	5	0.4752	585	b5	0.15541111	0.8433428571	2.0894857143	NA
4709	LAME0D10792g	5	0.4965	576	b5	0.08279763	0.8433428571	2.0894857143	NA
4709	LANO0A06854g	5	0.4948	576	b5	0.09789304	0.8433428571	2.0894857143	NA
4709	LAWA0A00694g	5	0.5292	633	b5	0.10736219	0.8433428571	2.0894857143	NA
4725	KLTH0E12947g	5	0.5931	204	b2	0.121392585	0.52258	2.18666	NA
4725	LACI0G12574g	5	0.4596	198	b2	0.2282484	0.52258	2.18666	NA
4725	LAFE0G14444g	5	0.4747	198	b2	0.12956749	0.52258	2.18666	NA
4725	LAMI0E07536g	5	0.4848	198	b2	0.20420444	0.52258	2.18666	NA
4725	LAWA0F12310g	5	0.4624	186	b2	0.13002838	0.52258	2.18666	NA
4730	KLTH0D02596g	5	0.4992	645	b1	0.16006553	0.3971666667	1.9564666667	NA
4730	LACI0G16820g	5	0.4395	678	b1	0.14443317	0.3971666667	1.9564666667	NA
4730	LAFE0D10748g	5	0.4468	573	b1	0.09478474	0.3971666667	1.9564666667	NA
4730	LAWA0E02498g	5	0.485	534	b1	0.10193419	0.3971666667	1.9564666667	NA
4730	SAKL0B09746g	5	0.4167	708	b1	0.07824151	0.3971666667	1.9564666667	NA
4744	KLTH0E14102g	5	0.6667	168	b5	0.6181365	0.13124	0.65998	0.19885451074275
4744	LADA0D02718g	5	0.625	168	b5	0.4558443	0.13124	0.65998	0.19885451074275
4744	LAFA0F17084g	5	0.5714	168	b5	0.7983558	0.13124	0.65998	0.19885451074275
4744	LAME0F02344g	5	0.6071	168	b5	0.586863	0.13124	0.65998	0.19885451074275
4744	LANO0E07294g	5	0.5879	165	b5	0.7344286	0.13124	0.65998	0.19885451074275
4750	KLTH0C08954g	5	0.4683	363	b1	0.12007219	0.7069333333	1.8998	NA
4750	LAFA0F03906g	5	0.4247	372	b1	0.14454474	0.7069333333	1.8998	NA
4750	LAME0F06018g	5	0.4032	372	b1	0.10790917	0.7069333333	1.8998	NA
4750	LANO0A04654g	5	0.4138	348	b1	0.10401113	0.7069333333	1.8998	NA
4750	SAKL0C08866g	5	0.5337	519	b1	0.083246954	0.7069333333	1.8998	NA
4756	LAMI0A02982g	5	0.3801	663	LAMI	0.1370398	0.06511	0.09294	0.700559500753174
4756	LAMI0H14400g	5	0.4112	552	LAMI	0.15878546	0.06511	0.09294	0.700559500753174
4756	LAMI0F12288g	5	0.3986	552	LAMI	0.1267877	0.06511	0.09294	0.700559500753174
4756	LAMI0D04654g	5	0.4007	564	LAMI	0.14153238	0.06511	0.09294	0.700559500753174
4756	LAMI0A04236g	5	0.3841	552	LAMI	0.13589767	0.06511	0.09294	0.700559500753174
4773	KLTH0C01716g	4	0.403	1119	b2	0.10733626	0.4614166667	1.1972	NA
4773	LACI0G00166g	4	0.3674	1233	b2	0.12581594	0.4614166667	1.1972	NA
4773	LACI0F00166g	4	0.383	1068	b2	0.13061227	0.4614166667	1.1972	NA
4773	LACI0C00122g	4	0.348	1296	b2	0.17324765	0.4614166667	1.1972	NA
4778	LADA0H19548g	4	0.481	501	b7	0.15643124	0.64198	2.16418	NA
4778	LAFA0F21286g	4	0.4324	444	b7	0.14018801	0.64198	2.16418	NA
4778	LAME0E01266g	4	0.4781	456	b7	0.108421646	0.64198	2.16418	NA
4778	LANO0F16446g	4	0.4622	450	b7	0.13856828	0.64198	2.16418	NA
4782	KLTH0G01078g	4	0.4286	462	b5	0.12657745	1.05234	1.58228	NA
4782	LADA0G15874g	4	0.4706	765	b5	0.12014634	1.05234	1.58228	NA
4782	LANO0D01090g	4	0.4181	720	b5	0.11682995	1.05234	1.58228	NA
4782	LAWA0D12926g	4	0.4097	432	b5	0.10385572	1.05234	1.58228	NA
4785	LACI0D02146g	4	0.4144	543	b1	0.15646328	0.50635	1.4296	NA
4785	LAFE0B06194g	4	0.4604	543	b1	0.11122254	0.50635	1.4296	NA
4785	LAMI0G08504g	4	0.4893	609	b1	0.15866971	0.50635	1.4296	NA
4785	SAKL0B01716g	4	0.4087	597	b1	0.11999957	0.50635	1.4296	NA
4815	LADA0D04258g	4	0.5611	180	b7	0.107924275	0.56364	1.68884	NA
4815	LAFA0E10132g	4	0.4747	198	b7	0.17482075	0.56364	1.68884	NA
4815	LAME0H07426g	4	0.4876	201	b7	0.25778583	0.56364	1.68884	NA
4815	LANO0E08504g	4	0.4564	195	b7	0.16962357	0.56364	1.68884	NA
4825	LACI0H02784g	4	0.4405	168	b1	0.20902315	0.38695	1.4938833333	NA
4825	LAFE0B02916g	4	0.4286	168	b1	0.20443809	0.38695	1.4938833333	NA
4825	LAMI0E15214g	4	0.506	168	b1	0.25983196	0.38695	1.4938833333	NA
4825	SAKL0F10890g	4	0.4061	261	b1	0.22082768	0.38695	1.4938833333	NA
4829	LACI0H07800g	4	0.5079	630	b1	0.079458155	0.89145	2.0301	NA
4829	LAFE0H04302g	4	0.6323	756	b1	0.029294502	0.89145	2.0301	NA
4829	LAMI0B00826g	4	0.6289	609	b1	0.122407466	0.89145	2.0301	NA
4829	SAKL0E12166g	4	0.4401	768	b1	0.09042523	0.89145	2.0301	NA
4837	LADA0B08086g	4	0.4783	1062	b7	0.11846046	0.2027166667	1.7280833333	NA
4837	LAFA0F04082g	4	0.4769	1080	b7	0.15422224	0.2027166667	1.7280833333	NA
4837	LAME0F05842g	4	0.4921	1077	b7	0.12193056	0.2027166667	1.7280833333	NA
4837	LANO0A04478g	4	0.4672	1053	b7	0.14862673	0.2027166667	1.7280833333	NA
4841	LADA0G01552g	4	0.605	519	b7	0.107071266	0.55295	2.274225	NA
4841	LAFA0G21330g	4	0.5663	558	b7	0.1762069	0.55295	2.274225	NA
4841	LAME0B04918g	4	0.6061	528	b7	0.16097637	0.55295	2.274225	NA
4841	LANO0E03422g	4	0.6817	399	b7	0.11192025	0.55295	2.274225	NA
4844	KLTH0E16742g	4	0.4101	690	b2	0.10991424	0.69268	1.87668	NA
4844	LAFE0A01794g	4	0.408	750	b2	0.06582799	0.69268	1.87668	NA
4844	LAMI0D08174g	4	0.4145	678	b2	0.15278175	0.69268	1.87668	NA
4844	LAWA0A00210g	4	0.4096	669	b2	0.09402535	0.69268	1.87668	NA
4863	LACI0F10572g	3	0.4789	426	b2	0.09430752	0.173	1.8579	NA
4863	LAFE0D01332g	3	0.5711	450	b2	0.058335587	0.173	1.8579	NA
4863	LAMI0B02564g	3	0.6762	732	b2	0.10972333	0.173	1.8579	NA
4882	LAFA0E00166g	3	0.6074	489	LAFA	0.030922217	NA	NA	NA
4882	LAFA0D17579g	3	0.6074	489	LAFA	0.030922217	NA	NA	NA
4882	LAFA0C00144g	3	0.6074	489	LAFA	0.030922217	NA	NA	NA
4888	KLTH0D18040g	3	0.4213	216	b5	0.0989762	0.3147333333	0.3559333333	0.884247986503488
4888	LANO0B01376g	3	0.4734	207	b5	0.064320125	0.3147333333	0.3559333333	0.884247986503488
4888	LAWA0D00452g	3	0.4098	183	b5	0.07859199	0.3147333333	0.3559333333	0.884247986503488
4903	LACI0C00254g	2	0.3882	1002	b3	0.10836007	NA	NA	NA
4903	LAFE0C13784g	2	0.3811	921	b3	0.068520926	NA	NA	NA
4904	KLTH0C01496g	2	0.5478	471	b6	0.07486662	NA	NA	NA
4904	LAWA0H01838g	2	0.4662	459	b6	0.09272496	NA	NA	NA
4909	LAFA0D00936g	2	0.4681	564	b9	0.14064075	0.7476	1.6403	NA
4909	LAME0H20362g	2	0.4549	732	b9	0.1332199	0.7476	1.6403	NA
4919	LACI0E06040g	2	0.3965	396	b1	0.111344434	0.6166	1.6741	NA
4919	SAKL0D01672g	2	0.3902	615	b1	0.089341834	0.6166	1.6741	NA
4927	LACI0F10946g	2	0.4201	657	b3	0.13424724	0.4907	2.1882	NA
4927	LAFE0D00936g	2	0.4874	1149	b3	0.110243104	0.4907	2.1882	NA
4930	LACI0F16622g	2	0.4753	486	b3	0.109519236	0.4159	1.0322	NA
4930	LAFE0E11386g	2	0.5	480	b3	0.048338804	0.4159	1.0322	NA
4933	LACI0G06700g	2	0.4746	531	b3	0.15917207	0.2472	1.0211	NA
4933	LAFE0G08350g	2	0.5009	531	b3	0.20031527	0.2472	1.0211	NA
4935	LAFA0E11254g	2	0.441	966	b9	0.12686473	0.495	2.238	NA
4935	LAME0H08526g	2	0.4624	1185	b9	0.12680899	0.495	2.238	NA
4939	LACI0H06678g	2	0.4315	825	b3	0.13543464	0.8856	1.5649	NA
4939	LAFE0H03180g	2	0.4968	777	b3	0.08405607	0.8856	1.5649	NA
4943	LACI0H21550g	2	0.5196	510	b3	0.09383687	0.5066	1.8054	NA
4943	LAFE0F04632g	2	0.5782	531	b3	0.035480097	0.5066	1.8054	NA
4949	LADA0E02300g	2	0.5423	627	b7	0.11149276	0.5248	1.4097	NA
4949	LANO0H02894g	2	0.543	582	b7	0.14359719	0.5248	1.4097	NA
4954	KLTH0H03454g	2	0.7204	372	b6	0.09627193	NA	NA	NA
4954	LAWA0A09780g	2	0.5806	360	b6	0.14521725	NA	NA	NA
4956	LAFA0B00694g	2	0.2936	528	b7	0.13087699	0.4375	1.5311	NA
4956	LANO0C04720g	2	0.2684	585	b7	0.14342758	0.4375	1.5311	NA
4957	LAFA0E00122g	2	0.453	543	LAFA	0.12489644	NA	NA	NA
4957	LAFA0C00122g	2	0.4457	543	LAFA	0.13184774	NA	NA	NA
4963	LAFE0F00166g	2	0.4238	453	b2	0.14621744	0.6563	1.9711	NA
4963	LANO0H24718g	2	0.4819	828	b2	0.19002701	0.6563	1.9711	NA
4969	SAKL0F16742g	2	NA	NA	SAKL	NA	NA	NA	NA
4969	SAKL0D00100g	2	NA	NA	SAKL	NA	NA	NA	NA
4971	LAMI0E06128g	2	0.4141	384	b1	0.15176976	0.8501	1.4081	NA
4971	SAKL0D10164g	2	0.4236	399	b1	0.08436801	0.8501	1.4081	NA
4979	SAKL0H01408g	2	0.4245	318	SAKL	0.14782427	NA	NA	NA
4979	SAKL0F09944g	2	0.4214	318	SAKL	0.1468799	NA	NA	NA
4987	LAMI0A08108g	2	0.4502	462	b4	0.21897475	0.3517	2.9792	NA
4987	LANO0B08614g	2	0.4815	459	b4	0.15146366	0.3517	2.9792	NA
4988	LAMI0C06590g	2	0.4216	510	LAMI	0.21540375	0.4715	0.5269	0.894856709052951
4988	LAMI0H14378g	2	0.4258	465	LAMI	0.15477371	0.4715	0.5269	0.894856709052951
4989	KLTH0G16830g	2	0.4706	1005	b5	0.10081635	NA	NA	NA
4989	LANO0C03246g	2	0.4423	927	b5	0.13208474	NA	NA	NA
4990	KLTH0C06996g	2	0.4524	588	b5	0.07780684	NA	NA	NA
4990	LANO0H11012g	2	0.4267	546	b5	0.08899512	NA	NA	NA
4991	KLTH0B05192g	2	0.4452	420	b6	0.09056824	NA	NA	NA
4991	LAWA0C09362g	2	0.4344	366	b6	0.112301916	NA	NA	NA
4993	KLTH0H00165g	2	0.4298	477	KLTH	0.10791149	NA	NA	NA
4993	KLTH0C11935g	2	0.4298	477	KLTH	0.10791149	NA	NA	NA
4995	KLTH0D16808g	2	0.5149	303	b6	0.21842681	NA	NA	NA
4995	LAWA0D01640g	2	0.4757	309	b6	0.21252312	NA	NA	NA
4997	KLTH0F14652g	2	0.6782	432	b6	0.056937028	0.6928	2.0358	NA
4997	LAWA0B07844g	2	0.5097	465	b6	0.063869774	0.6928	2.0358	NA
5000	LACI0B02080g	1	0.4935	537	LACI	0.16791284	NA	NA	NA
5001	LACI0B02234g	1	0.4119	471	LACI	0.085841596	NA	NA	NA
5002	LACI0C02718g	1	0.5589	492	LACI	0.07456002	NA	NA	NA
5003	LACI0C09912g	1	0.4177	486	LACI	0.10079284	NA	NA	NA
5006	LACI0E04852g	1	0.459	525	LACI	0.13626039	NA	NA	NA
5008	LACI0F00870g	1	0.5272	459	LACI	0.07629833	NA	NA	NA
5009	LACI0F16446g	1	0.5899	456	LACI	0.059654973	NA	NA	NA
5010	LACI0G07272g	1	0.4322	627	LACI	0.22265114	NA	NA	NA
5011	LACI0G08658g	1	0.4886	219	LACI	0.18210486	NA	NA	NA
5013	LACI0G13762g	1	0.5029	171	LACI	0.36212432	NA	NA	NA
5015	LACI0H06458g	1	0.4668	1296	LACI	0.16037394	NA	NA	NA
5016	LACI0H07822g	1	0.4275	138	LACI	0.12391351	NA	NA	NA
5017	LANO0H20824g	1	0.4793	822	LANO	0.12678224	NA	NA	NA
5018	LADA0A01068g	1	0.5009	549	LADA	0.13927235	NA	NA	NA
5019	LADA0A01530g	1	0.5204	540	LADA	0.10740319	NA	NA	NA
5020	LADA0A01640g	1	0.4527	645	LADA	0.09794821	NA	NA	NA
5021	LADA0A02696g	1	0.5208	528	LADA	0.07781199	NA	NA	NA
5022	LADA0A05270g	1	0.5481	582	LADA	0.07500602	NA	NA	NA
5023	LADA0A07690g	1	0.5569	510	LADA	0.08170191	NA	NA	NA
5024	LADA0A08922g	1	0.5132	717	LADA	0.103961125	NA	NA	NA
5025	LADA0B01024g	1	0.6038	954	LADA	0.11800353	NA	NA	NA
5029	LADA0C02828g	1	0.4667	480	LADA	0.13955419	NA	NA	NA
5030	LADA0C05644g	1	0.4307	534	LADA	0.09731829	NA	NA	NA
5031	LADA0C06810g	1	0.5187	615	LADA	0.08845149	NA	NA	NA
5032	LADA0C07514g	1	0.6484	546	LADA	0.09425479	NA	NA	NA
5035	LADA0D00122g	1	0.5371	525	LADA	0.10036591	NA	NA	NA
5036	LADA0D02916g	1	0.4605	621	LADA	0.13655461	NA	NA	NA
5037	LADA0D05182g	1	0.4581	465	LADA	0.08194207	NA	NA	NA
5038	LADA0D07514g	1	0.4771	633	LADA	0.15298909	NA	NA	NA
5041	LADA0D11518g	1	0.546	729	LADA	0.109233744	NA	NA	NA
5043	LADA0D13080g	1	0.5314	717	LADA	0.11182281	NA	NA	NA
5045	LADA0E03576g	1	0.5619	840	LADA	0.09458037	NA	NA	NA
5046	LADA0E04632g	1	0.5591	465	LADA	0.06339421	NA	NA	NA
5048	LADA0E06590g	1	0.5954	477	LADA	0.12610109	NA	NA	NA
5049	LADA0E10726g	1	0.6414	474	LADA	0.09986015	NA	NA	NA
5050	LADA0E11606g	1	0.5189	264	LADA	0.08300382	NA	NA	NA
5051	LADA0F01486g	1	0.5	450	LADA	0.07211827	NA	NA	NA
5052	LADA0F03950g	1	0.4793	459	LADA	0.09076489	NA	NA	NA
5053	LADA0F05006g	1	0.5556	909	LADA	0.06408702	NA	NA	NA
5054	LADA0F05402g	1	0.5291	567	LADA	0.082540564	NA	NA	NA
5055	LADA0F06590g	1	0.6068	702	LADA	0.07941034	NA	NA	NA
5056	LADA0G02828g	1	0.5475	453	LADA	0.08392825	NA	NA	NA
5057	LADA0G04192g	1	0.5574	531	LADA	0.06093498	NA	NA	NA
5058	LADA0G05358g	1	0.5246	732	LADA	0.08306141	NA	NA	NA
5059	LADA0G14048g	1	0.468	453	LADA	0.063672595	NA	NA	NA
5060	LADA0G15500g	1	0.581	525	LADA	0.0916241	NA	NA	NA
5061	LADA0H00408g	1	0.5472	561	LADA	0.09530267	NA	NA	NA
5062	LADA0H01112g	1	0.5382	654	LADA	0.08881822	NA	NA	NA
5063	LADA0H01464g	1	0.5828	453	LADA	0.07315875	NA	NA	NA
5064	LADA0H04170g	1	0.547	543	LADA	0.14082268	NA	NA	NA
5065	LADA0H04588g	1	0.5825	582	LADA	0.09887878	NA	NA	NA
5067	LADA0H07162g	1	0.6501	543	LADA	0.06139786	NA	NA	NA
5068	LADA0H09934g	1	0.536	750	LADA	0.10033934	NA	NA	NA
5069	LADA0H11606g	1	0.4863	582	LADA	0.11689181	NA	NA	NA
5072	LADA0H18404g	1	0.6577	558	LADA	0.05533394	NA	NA	NA
5073	LAFA0A02102g	1	0.4304	855	LAFA	0.1304239	NA	NA	NA
5075	LAFA0A04258g	1	0.4465	486	LAFA	0.098499835	NA	NA	NA
5076	LAFA0B03290g	1	0.4702	570	LAFA	0.11550154	NA	NA	NA
5077	LAFA0B04610g	1	0.4697	528	LAFA	0.10932294	NA	NA	NA
5078	LAFA0B07250g	1	0.4069	462	LAFA	0.11927222	NA	NA	NA
5079	LAFA0B08438g	1	0.4466	459	LAFA	0.12515602	NA	NA	NA
5080	LAFA0C00342g	1	0.4792	624	LAFA	0.12735392	NA	NA	NA
5081	LAFA0C01024g	1	0.4641	459	LAFA	0.09575858	NA	NA	NA
5082	LAFA0C03026g	1	0.4576	507	LAFA	0.07909035	NA	NA	NA
5083	LAFA0C03290g	1	0.4756	513	LAFA	0.11105504	NA	NA	NA
5084	LAFA0C06634g	1	0.4327	513	LAFA	0.15134916	NA	NA	NA
5085	LAFA0C08042g	1	0.4495	525	LAFA	0.09342917	NA	NA	NA
5086	LAFA0C08350g	1	0.443	474	LAFA	0.104883075	NA	NA	NA
5087	LAFA0C10022g	1	0.4154	573	LAFA	0.0818284	NA	NA	NA
5088	LAFA0C10704g	1	0.4583	576	LAFA	0.09207755	NA	NA	NA
5089	LAFA0D00122g	1	0.4364	330	LAFA	0.1573002	NA	NA	NA
5091	LAFA0D01332g	1	0.4717	477	LAFA	0.09882087	NA	NA	NA
5092	LAFA0D01750g	1	0.5465	624	LAFA	0.07902613	NA	NA	NA
5093	LAFA0D01794g	1	0.4283	474	LAFA	0.08194858	NA	NA	NA
5094	LAFA0D02190g	1	0.5301	798	LAFA	0.07911788	NA	NA	NA
5095	LAFA0D06766g	1	0.4828	522	LAFA	0.15771727	NA	NA	NA
5096	LAFA0D06942g	1	0.4979	486	LAFA	0.09280179	NA	NA	NA
5097	LAFA0D07492g	1	0.4493	483	LAFA	0.11332243	NA	NA	NA
5098	LAFA0D07624g	1	0.4904	522	LAFA	0.05956439	NA	NA	NA
5099	LAFA0D11210g	1	0.4625	534	LAFA	0.099241346	NA	NA	NA
5100	LAFA0D12002g	1	0.3879	495	LAFA	0.08456409	NA	NA	NA
5101	LAFA0D12046g	1	0.4021	480	LAFA	0.14440668	NA	NA	NA
5102	LAFA0D16380g	1	0.3655	249	LAFA	0.082159646	NA	NA	NA
5105	LAFA0E10484g	1	0.4978	456	LAFA	0.14000033	NA	NA	NA
5106	LAFA0E21022g	1	0.5253	651	LAFA	0.10331	NA	NA	NA
5107	LAFA0F03334g	1	0.4651	501	LAFA	0.11528718	NA	NA	NA
5108	LAFA0F06656g	1	0.4209	468	LAFA	0.11904075	NA	NA	NA
5109	LAFA0F13806g	1	0.4352	540	LAFA	0.11305019	NA	NA	NA
5111	LAFA0G01486g	1	0.3846	468	LAFA	0.059605125	NA	NA	NA
5112	LAFA0G05028g	1	0.4762	483	LAFA	0.13358228	NA	NA	NA
5113	LAFA0G07382g	1	0.429	648	LAFA	0.12997372	NA	NA	NA
5114	LAFA0G17568g	1	0.364	456	LAFA	0.14002466	NA	NA	NA
5115	LAFA0G20406g	1	0.4803	456	LAFA	0.10771313	NA	NA	NA
5116	LAFA0G20934g	1	0.3896	498	LAFA	0.08364728	NA	NA	NA
5117	LAFA0G24432g	1	0.4907	540	LAFA	0.086163454	NA	NA	NA
5118	LAFE0A03334g	1	0.6356	450	LAFE	0.049721435	NA	NA	NA
5119	LAFE0A03774g	1	0.7386	459	LAFE	0.02099795	NA	NA	NA
5120	LAFE0A05446g	1	0.648	963	LAFE	0.040353704	NA	NA	NA
5121	LAFE0A06876g	1	0.6218	624	LAFE	0.04667472	NA	NA	NA
5122	LAFE0A07866g	1	0.6693	759	LAFE	0.04001866	NA	NA	NA
5123	LAFE0B04566g	1	0.6407	732	LAFE	0.044674106	NA	NA	NA
5124	LAFE0B05292g	1	0.6281	882	LAFE	0.04835802	NA	NA	NA
5125	LAFE0B05358g	1	0.6193	486	LAFE	0.046869993	NA	NA	NA
5126	LAFE0B08812g	1	0.5711	450	LAFE	0.028979748	NA	NA	NA
5127	LAFE0B08856g	1	0.6195	870	LAFE	0.038366556	NA	NA	NA
5128	LAFE0B10044g	1	0.5732	492	LAFE	0.050574824	NA	NA	NA
5131	LAFE0C01794g	1	0.6019	540	LAFE	0.032613173	NA	NA	NA
5132	LAFE0C02828g	1	0.5909	462	LAFE	0.06079585	NA	NA	NA
5133	LAFE0C02872g	1	0.6258	465	LAFE	0.038866162	NA	NA	NA
5134	LAFE0C04808g	1	0.5785	522	LAFE	0.04161308	NA	NA	NA
5135	LAFE0C05688g	1	0.7476	531	LAFE	0.026555197	NA	NA	NA
5136	LAFE0C07338g	1	0.5587	537	LAFE	0.043563206	NA	NA	NA
5137	LAFE0C08196g	1	0.7088	546	LAFE	0.017952947	NA	NA	NA
5138	LAFE0C10286g	1	0.6511	837	LAFE	0.05837752	NA	NA	NA
5139	LAFE0C10704g	1	0.5055	639	LAFE	0.072111994	NA	NA	NA
5140	LAFE0C11782g	1	0.6653	723	LAFE	0.023859402	NA	NA	NA
5142	LAFE0D00144g	1	0.3685	483	LAFE	0.07815302	NA	NA	NA
5143	LAFE0D02190g	1	0.6835	474	LAFE	0.040722538	NA	NA	NA
5144	LAFE0D04148g	1	0.7237	456	LAFE	0.018817969	NA	NA	NA
5145	LAFE0D05094g	1	0.6588	507	LAFE	0.02549449	NA	NA	NA
5146	LAFE0D06348g	1	0.526	1770	LAFE	0.05858094	NA	NA	NA
5147	LAFE0D09934g	1	0.6028	564	LAFE	0.046891745	NA	NA	NA
5148	LAFE0D11782g	1	0.5455	693	LAFE	0.077075735	NA	NA	NA
5149	LAFE0D12068g	1	0.671	459	LAFE	0.043365557	NA	NA	NA
5152	LAFE0E07382g	1	0.615	678	LAFE	0.03263407	NA	NA	NA
5153	LAFE0E08504g	1	0.5267	486	LAFE	0.063913964	NA	NA	NA
5154	LAFE0E11210g	1	0.6821	453	LAFE	0.031469453	NA	NA	NA
5155	LAFE0E11474g	1	0.4286	525	LAFE	0.072218776	NA	NA	NA
5156	LAFE0E12574g	1	0.5431	510	LAFE	0.06466827	NA	NA	NA
5157	LAFE0E14686g	1	0.547	468	LAFE	0.04675626	NA	NA	NA
5158	LAFE0F00100g	1	0.4946	645	LAFE	0.08041711	NA	NA	NA
5160	LAFE0F03796g	1	0.7282	504	LAFE	0.021147355	NA	NA	NA
5161	LAFE0F08152g	1	0.673	474	LAFE	0.025773857	NA	NA	NA
5162	LAFE0F10836g	1	0.5159	597	LAFE	0.07513904	NA	NA	NA
5163	LAFE0F11232g	1	0.7179	546	LAFE	0.023587037	NA	NA	NA
5164	LAFE0F14928g	1	0.5427	621	LAFE	0.049821813	NA	NA	NA
5165	LAFE0F17128g	1	0.489	546	LAFE	0.06476515	NA	NA	NA
5167	LAFE0G04764g	1	0.6212	462	LAFE	0.05906484	NA	NA	NA
5168	LAFE0G06414g	1	0.7273	792	LAFE	0.0275016	NA	NA	NA
5169	LAFE0G06458g	1	0.5439	570	LAFE	0.06474471	NA	NA	NA
5170	LAFE0G08900g	1	0.4187	1593	LAFE	0.042703647	NA	NA	NA
5172	LAFE0G14004g	1	0.4314	2202	LAFE	0.0458116	NA	NA	NA
5173	LAFE0G15654g	1	0.6377	690	LAFE	0.05527692	NA	NA	NA
5174	LAFE0H01310g	1	0.5884	639	LAFE	0.032671224	NA	NA	NA
5175	LAFE0H02960g	1	0.4684	1377	LAFE	0.1328875	NA	NA	NA
5176	LAFE0H04368g	1	0.4817	600	LAFE	0.07327686	NA	NA	NA
5177	LAFE0H05138g	1	0.6667	1200	LAFE	0.026334476	NA	NA	NA
5178	LAFE0H11034g	1	0.6766	804	LAFE	0.02923426	NA	NA	NA
5179	LAFE0H12244g	1	0.6605	816	LAFE	0.036135077	NA	NA	NA
5180	LAFE0H13190g	1	0.6521	618	LAFE	0.034716055	NA	NA	NA
5181	LAFE0H16556g	1	0.7358	477	LAFE	0.017621562	NA	NA	NA
5182	LAFE0H17656g	1	0.3869	504	LAFE	0.068542056	NA	NA	NA
5183	SAKL0A02222g	1	0.4052	348	SAKL	0.08284057	NA	NA	NA
5184	SAKL0A02706g	1	0.512	711	SAKL	0.060649835	NA	NA	NA
5186	SAKL0A03784g	1	0.3978	1257	SAKL	0.08384221	NA	NA	NA
5187	SAKL0A05302g	1	0.4113	282	SAKL	0.1063031	NA	NA	NA
5188	SAKL0A06402g	1	0.33	297	SAKL	0.09640205	NA	NA	NA
5189	SAKL0A06941g	1	0.4835	486	SAKL	0.04238745	NA	NA	NA
5191	SAKL0A08646g	1	0.3827	486	SAKL	0.0945499	NA	NA	NA
5192	SAKL0A10340g	1	0.4333	300	SAKL	0.038872503	NA	NA	NA
5194	SAKL0A10604g	1	0.4371	318	SAKL	0.10533385	NA	NA	NA
5195	SAKL0A10681g	1	0.5743	498	SAKL	0.028074741	NA	NA	NA
5196	SAKL0B00198g	1	0.3987	306	SAKL	0.058371767	NA	NA	NA
5197	SAKL0B00352pg	1	0.364	1412	SAKL	0.04191928	NA	NA	NA
5198	SAKL0B01430g	1	0.4495	396	SAKL	0.04841053	NA	NA	NA
5201	SAKL0B03410g	1	0.531	420	SAKL	0.041718524	NA	NA	NA
5202	SAKL0B04048g	1	0.3907	453	SAKL	0.07937501	NA	NA	NA
5204	SAKL0B05698g	1	0.4	210	SAKL	0.12621272	NA	NA	NA
5205	SAKL0B07084g	1	0.4088	318	SAKL	0.0941604	NA	NA	NA
5206	SAKL0B07172g	1	0.4599	324	SAKL	0.051399976	NA	NA	NA
5207	SAKL0B08162g	1	0.4844	450	SAKL	0.048199754	NA	NA	NA
5208	SAKL0B08250g	1	0.387	2031	SAKL	0.086396	NA	NA	NA
5210	SAKL0B09339g	1	0.4602	465	SAKL	0.051510748	NA	NA	NA
5211	SAKL0B10670g	1	0.393	201	SAKL	0.10299222	NA	NA	NA
5212	SAKL0B10890g	1	0.5265	264	SAKL	0.0753558	NA	NA	NA
5213	SAKL0B10945g	1	0.4459	462	SAKL	0.080608964	NA	NA	NA
5214	SAKL0B11352g	1	0.4428	201	SAKL	0.033574257	NA	NA	NA
5216	SAKL0B12386g	1	0.3588	354	SAKL	0.060409013	NA	NA	NA
5217	SAKL0B12650g	1	0.412	216	SAKL	0.08443544	NA	NA	NA
5218	SAKL0B12760g	1	0.4339	189	SAKL	0.07334755	NA	NA	NA
5220	SAKL0C00165g	1	0.4083	507	SAKL	0.06504348	NA	NA	NA
5221	SAKL0C00198g	1	0.4933	669	SAKL	0.044245698	NA	NA	NA
5222	SAKL0C00374g	1	0.5	312	SAKL	0.057321105	NA	NA	NA
5223	SAKL0C00583g	1	0.5158	603	SAKL	0.041645132	NA	NA	NA
5224	SAKL0C00638g	1	0.5109	1836	SAKL	0.060680177	NA	NA	NA
5225	SAKL0C00902g	1	0.5748	294	SAKL	0.020869734	NA	NA	NA
5226	SAKL0C01562g	1	0.4958	474	SAKL	0.053198546	NA	NA	NA
5227	SAKL0C01584g	1	0.5582	627	SAKL	0.02416862	NA	NA	NA
5228	SAKL0C01672g	1	NA	NA	SAKL	NA	NA	NA	NA
5229	SAKL0C01793g	1	0.4628	471	SAKL	0.054345123	NA	NA	NA
5230	SAKL0C02068g	1	0.4236	399	SAKL	0.09452917	NA	NA	NA
5231	SAKL0C02431g	1	0.5768	456	SAKL	0.03265919	NA	NA	NA
5232	SAKL0C02530g	1	0.4815	270	SAKL	0.06524281	NA	NA	NA
5233	SAKL0C02706g	1	0.4042	480	SAKL	0.05307053	NA	NA	NA
5234	SAKL0C03333g	1	0.4847	489	SAKL	0.07443204	NA	NA	NA
5235	SAKL0C03751g	1	0.5749	534	SAKL	0.04305648	NA	NA	NA
5236	SAKL0C04609g	1	0.5333	495	SAKL	0.045098104	NA	NA	NA
5237	SAKL0C04895g	1	0.5011	459	SAKL	0.05496251	NA	NA	NA
5238	SAKL0C06138g	1	0.5	306	SAKL	0.08452433	NA	NA	NA
5239	SAKL0C06160g	1	0.488	498	SAKL	0.049237475	NA	NA	NA
5240	SAKL0C06688g	1	0.5368	693	SAKL	0.072969966	NA	NA	NA
5243	SAKL0C08228g	1	0.4388	531	SAKL	0.08565446	NA	NA	NA
5244	SAKL0C08316g	1	0.5092	1086	SAKL	0.06298828	NA	NA	NA
5245	SAKL0C09548g	1	0.5126	396	SAKL	0.058508437	NA	NA	NA
5246	SAKL0C10208g	1	0.5541	1413	SAKL	0.060009547	NA	NA	NA
5247	SAKL0C10670g	1	0.549	357	SAKL	0.063195564	NA	NA	NA
5248	SAKL0C10912g	1	0.5148	540	SAKL	0.072860315	NA	NA	NA
5249	SAKL0C11088g	1	0.3981	540	SAKL	0.06819727	NA	NA	NA
5250	SAKL0C11638g	1	0.4172	453	SAKL	0.033250213	NA	NA	NA
5251	SAKL0C12056g	1	0.5128	507	SAKL	0.03893523	NA	NA	NA
5252	SAKL0C12826g	1	0.513	423	SAKL	0.05032218	NA	NA	NA
5253	SAKL0C13090g	1	0.3894	339	SAKL	0.12532538	NA	NA	NA
5254	SAKL0C13486g	1	0.3947	228	SAKL	0.034914598	NA	NA	NA
5255	SAKL0C13640g	1	0.397	267	SAKL	0.06796449	NA	NA	NA
5257	SAKL0D00198g	1	0.3571	378	SAKL	0.038066845	NA	NA	NA
5258	SAKL0D00506g	1	0.4409	93	SAKL	0.042916253	NA	NA	NA
5260	SAKL0D02376g	1	0.4292	219	SAKL	0.075891644	NA	NA	NA
5261	SAKL0D03080g	1	0.4537	648	SAKL	0.068265095	NA	NA	NA
5263	SAKL0D04697g	1	0.4081	468	SAKL	0.025305808	NA	NA	NA
5265	SAKL0D06292g	1	0.4295	468	SAKL	0.06895789	NA	NA	NA
5268	SAKL0D09020g	1	0.3549	417	SAKL	0.098180644	NA	NA	NA
5269	SAKL0D09790g	1	0.4256	390	SAKL	0.050402954	NA	NA	NA
5270	SAKL0D09878g	1	0.3745	2064	SAKL	0.091562584	NA	NA	NA
5272	SAKL0D13750g	1	0.3716	366	SAKL	0.10836629	NA	NA	NA
5273	SAKL0D13772g	1	0.4	345	SAKL	0.06632068	NA	NA	NA
5274	SAKL0D13838g	1	0.5092	489	SAKL	0.040399525	NA	NA	NA
5275	SAKL0D15224g	1	0.3795	303	SAKL	0.09141006	NA	NA	NA
5276	SAKL0D15334g	1	0.3587	276	SAKL	0.0693992	NA	NA	NA
5277	SAKL0E00396g	1	0.4042	240	SAKL	0.05474031	NA	NA	NA
5278	SAKL0E02464g	1	0.3754	309	SAKL	0.05899568	NA	NA	NA
5279	SAKL0E04807g	1	0.5162	618	SAKL	0.081239216	NA	NA	NA
5280	SAKL0E05236g	1	0.486	321	SAKL	0.08557104	NA	NA	NA
5281	SAKL0E05280g	1	0.3917	240	SAKL	0.068129875	NA	NA	NA
5282	SAKL0E08437g	1	0.4547	585	SAKL	0.039574556	NA	NA	NA
5283	SAKL0E08690g	1	0.4706	408	SAKL	0.07565383	NA	NA	NA
5285	SAKL0E11726g	1	0.4458	249	SAKL	0.08395666	NA	NA	NA
5288	SAKL0E14586g	1	0.3644	225	SAKL	0.06474485	NA	NA	NA
5289	SAKL0E14608g	1	0.4444	189	SAKL	0.102202214	NA	NA	NA
5290	SAKL0E14784g	1	0.4201	219	SAKL	0.07426866	NA	NA	NA
5291	SAKL0E14795g	1	0.4507	477	SAKL	0.03348716	NA	NA	NA
5292	SAKL0E15422g	1	0.4356	225	SAKL	0.052621417	NA	NA	NA
5293	SAKL0F00352g	1	0.3846	273	SAKL	0.060175337	NA	NA	NA
5294	SAKL0F00374g	1	0.392	375	SAKL	0.055822514	NA	NA	NA
5295	SAKL0F02200g	1	0.4328	543	SAKL	0.057622362	NA	NA	NA
5296	SAKL0F02948g	1	0.4291	522	SAKL	0.08659811	NA	NA	NA
5297	SAKL0F06116g	1	0.3148	270	SAKL	0.11494696	NA	NA	NA
5298	SAKL0F06259g	1	0.566	477	SAKL	0.048076812	NA	NA	NA
5299	SAKL0F08800g	1	0.4685	333	SAKL	0.04628075	NA	NA	NA
5300	SAKL0F09130g	1	0.5267	393	SAKL	0.060957916	NA	NA	NA
5301	SAKL0F09218g	1	0.5041	363	SAKL	0.039835922	NA	NA	NA
5302	SAKL0F09372g	1	0.3659	276	SAKL	0.10905038	NA	NA	NA
5303	SAKL0F11066g	1	0.4412	306	SAKL	0.057876665	NA	NA	NA
5304	SAKL0F11220g	1	0.3782	312	SAKL	0.13699403	NA	NA	NA
5305	SAKL0F11572g	1	0.4239	309	SAKL	0.061357815	NA	NA	NA
5306	SAKL0F11627g	1	0.5192	468	SAKL	0.04406724	NA	NA	NA
5307	SAKL0F11836g	1	0.4583	240	SAKL	0.06666485	NA	NA	NA
5308	SAKL0F14190g	1	0.4779	249	SAKL	0.054725762	NA	NA	NA
5309	SAKL0F14256g	1	0.3906	2094	SAKL	0.07125099	NA	NA	NA
5310	SAKL0F14300g	1	0.3995	831	SAKL	0.06873446	NA	NA	NA
5313	SAKL0F16676g	1	0.5474	285	SAKL	0.041990202	NA	NA	NA
5314	SAKL0G00176g	1	0.3894	624	SAKL	0.05868039	NA	NA	NA
5315	SAKL0G00264pg	1	0.3899	318	SAKL	0.078197755	NA	NA	NA
5317	SAKL0G09350g	1	0.3516	219	SAKL	0.07932156	NA	NA	NA
5318	SAKL0G09372g	1	0.3922	612	SAKL	0.083608605	NA	NA	NA
5319	SAKL0G09504g	1	0.3734	474	SAKL	0.07117856	NA	NA	NA
5320	SAKL0G10626g	1	0.3514	609	SAKL	0.067405105	NA	NA	NA
5322	SAKL0G13508g	1	0.4092	870	SAKL	0.07542054	NA	NA	NA
5323	SAKL0G14113g	1	0.5421	546	SAKL	0.02293098	NA	NA	NA
5324	SAKL0G14927g	1	0.5583	480	SAKL	0.03955273	NA	NA	NA
5325	SAKL0G16269g	1	0.4655	507	SAKL	0.069664806	NA	NA	NA
5326	SAKL0G18612g	1	0.4471	255	SAKL	0.07352201	NA	NA	NA
5327	SAKL0G19261g	1	0.4949	495	SAKL	0.05508362	NA	NA	NA
5328	SAKL0G19734g	1	0.3871	1320	SAKL	0.08850331	NA	NA	NA
5329	SAKL0G19822g	1	0.388	732	SAKL	0.07404693	NA	NA	NA
5330	SAKL0G19833g	1	0.4625	480	SAKL	0.039088894	NA	NA	NA
5331	SAKL0H11902g	1	0.4397	282	SAKL	0.04185264	NA	NA	NA
5332	SAKL0H13178g	1	0.4053	528	SAKL	0.06844029	NA	NA	NA
5335	SAKL0H21780g	1	0.3878	312	SAKL	0.09091913	NA	NA	NA
5336	SAKL0H24332g	1	0.417	1374	SAKL	0.07636539	NA	NA	NA
5337	LAME0A01970g	1	0.4515	618	LAME	0.11341755	NA	NA	NA
5338	LAME0A02806g	1	0.4788	591	LAME	0.099477366	NA	NA	NA
5339	LAME0A02982g	1	0.4307	462	LAME	0.14747392	NA	NA	NA
5340	LAME0A04412g	1	0.4798	471	LAME	0.122370586	NA	NA	NA
5341	LAME0A05160g	1	0.5039	2445	LAME	0.078566626	NA	NA	NA
5342	LAME0A07140g	1	0.4535	591	LAME	0.115193695	NA	NA	NA
5344	LAME0B00364g	1	0.501	483	LAME	0.071129054	NA	NA	NA
5345	LAME0B01310g	1	0.4233	567	LAME	0.09618284	NA	NA	NA
5346	LAME0B05732g	1	0.4691	486	LAME	0.1431496	NA	NA	NA
5347	LAME0B07580g	1	0.5044	450	LAME	0.12631667	NA	NA	NA
5349	LAME0C06568g	1	0.5127	474	LAME	0.12230402	NA	NA	NA
5350	LAME0C07250g	1	0.4432	519	LAME	0.083031684	NA	NA	NA
5352	LAME0D02432g	1	0.4444	450	LAME	0.11825756	NA	NA	NA
5353	LAME0D03796g	1	0.4556	450	LAME	0.083406754	NA	NA	NA
5354	LAME0D06238g	1	0.4194	639	LAME	0.14136566	NA	NA	NA
5355	LAME0F01684g	1	0.5517	513	LAME	0.17563614	NA	NA	NA
5356	LAME0F03114g	1	0.5152	462	LAME	0.14892958	NA	NA	NA
5357	LAME0F11628g	1	0.4428	621	LAME	0.10314328	NA	NA	NA
5358	LAME0F11914g	1	0.4393	453	LAME	0.11218123	NA	NA	NA
5359	LAME0F12332g	1	0.4693	456	LAME	0.08698831	NA	NA	NA
5360	LAME0G00628g	1	0.4839	498	LAME	0.122872226	NA	NA	NA
5362	LAME0G17502g	1	0.4444	468	LAME	0.12829906	NA	NA	NA
5363	LAME0G18360g	1	0.4679	468	LAME	0.09061987	NA	NA	NA
5364	LAME0H02146g	1	0.4289	450	LAME	0.15645237	NA	NA	NA
5365	LAME0H04368g	1	0.4628	618	LAME	0.11476148	NA	NA	NA
5366	LAME0H10990g	1	0.5049	618	LAME	0.11458968	NA	NA	NA
5367	LAME0H14268g	1	0.4325	504	LAME	0.09607881	NA	NA	NA
5368	LAME0H14620g	1	0.5	498	LAME	0.08912616	NA	NA	NA
5369	LAME0H14642g	1	0.3939	495	LAME	0.12518413	NA	NA	NA
5370	LAME0H19592g	1	0.4587	303	LAME	0.22787337	NA	NA	NA
5371	LAME0H21022g	1	0.529	465	LAME	0.14202808	NA	NA	NA
5372	LAMI0A03114g	1	0.6667	486	LAMI	0.082110524	NA	NA	NA
5373	LAMI0A06700g	1	0.4959	486	LAMI	0.13051778	NA	NA	NA
5374	LAMI0A07052g	1	0.688	609	LAMI	0.06909385	NA	NA	NA
5375	LAMI0A07646g	1	0.6356	450	LAMI	0.10591041	NA	NA	NA
5377	LAMI0B01442g	1	0.5869	765	LAMI	0.16425852	NA	NA	NA
5378	LAMI0B03510g	1	0.6205	477	LAMI	0.11812432	NA	NA	NA
5379	LAMI0B03620g	1	0.4991	531	LAMI	0.12593198	NA	NA	NA
5380	LAMI0B08108g	1	0.5314	510	LAMI	0.09601533	NA	NA	NA
5381	LAMI0C03994g	1	0.5556	477	LAMI	0.11431706	NA	NA	NA
5382	LAMI0C06370g	1	0.6255	534	LAMI	0.09541389	NA	NA	NA
5383	LAMI0C07140g	1	0.4885	477	LAMI	0.14825258	NA	NA	NA
5384	LAMI0C08790g	1	0.4688	576	LAMI	0.11590505	NA	NA	NA
5385	LAMI0D01464g	1	0.5612	474	LAMI	0.102140516	NA	NA	NA
5387	LAMI0D03620g	1	0.5	564	LAMI	0.11588184	NA	NA	NA
5388	LAMI0D05380g	1	0.6984	630	LAMI	0.06141945	NA	NA	NA
5389	LAMI0D10022g	1	0.43	486	LAMI	0.12894677	NA	NA	NA
5390	LAMI0D11254g	1	0.5548	465	LAMI	0.092700444	NA	NA	NA
5393	LAMI0E06612g	1	0.5265	678	LAMI	0.14624974	NA	NA	NA
5394	LAMI0E08702g	1	0.5655	168	LAMI	0.4223144	NA	NA	NA
5395	LAMI0E09956g	1	0.5108	462	LAMI	0.1356062	NA	NA	NA
5397	LAMI0F00430g	1	0.4308	708	LAMI	0.13133526	NA	NA	NA
5398	LAMI0F05820g	1	0.5667	570	LAMI	0.12052992	NA	NA	NA
5399	LAMI0F10770g	1	0.5986	558	LAMI	0.08200839	NA	NA	NA
5400	LAMI0F11144g	1	0.4477	831	LAMI	0.15443927	NA	NA	NA
5401	LAMI0F12266g	1	0.6807	711	LAMI	0.07010316	NA	NA	NA
5402	LAMI0F14246g	1	0.4917	600	LAMI	0.21308744	NA	NA	NA
5403	LAMI0F16204g	1	0.598	495	LAMI	0.061619774	NA	NA	NA
5404	LAMI0G01662g	1	0.4933	519	LAMI	0.14230114	NA	NA	NA
5405	LAMI0G03202g	1	0.5676	525	LAMI	0.14368197	NA	NA	NA
5406	LAMI0G03708g	1	0.3904	456	LAMI	0.117508546	NA	NA	NA
5407	LAMI0G09648g	1	0.5779	552	LAMI	0.119605854	NA	NA	NA
5408	LAMI0G09670g	1	0.4386	456	LAMI	0.14333692	NA	NA	NA
5409	LAMI0G10528g	1	0.5842	570	LAMI	0.15372194	NA	NA	NA
5410	LAMI0G11892g	1	0.5297	657	LAMI	0.0933701	NA	NA	NA
5411	LAMI0G12266g	1	0.5472	477	LAMI	0.12873222	NA	NA	NA
5412	LAMI0G12992g	1	0.4221	507	LAMI	0.2179891	NA	NA	NA
5413	LAMI0G16336g	1	0.5268	579	LAMI	0.13558778	NA	NA	NA
5414	LAMI0H04302g	1	0.5719	570	LAMI	0.0869489	NA	NA	NA
5415	LAMI0H04896g	1	0.5062	480	LAMI	0.13232195	NA	NA	NA
5416	LAMI0H07316g	1	0.4482	618	LAMI	0.141645	NA	NA	NA
5417	LAMI0H19152g	1	0.4762	525	LAMI	0.1321148	NA	NA	NA
5418	LANO0A01024g	1	0.477	564	LANO	0.111151166	NA	NA	NA
5420	LANO0A02960g	1	0.4902	765	LANO	0.13697393	NA	NA	NA
5421	LANO0A02982g	1	0.4764	783	LANO	0.12014103	NA	NA	NA
5422	LANO0A03554g	1	0.5048	519	LANO	0.1045411	NA	NA	NA
5423	LANO0B00188g	1	0.4147	516	LANO	0.10002388	NA	NA	NA
5424	LANO0B00452g	1	0.5098	510	LANO	0.09264514	NA	NA	NA
5425	LANO0B01574g	1	0.5123	486	LANO	0.10675755	NA	NA	NA
5426	LANO0B01596g	1	0.4868	456	LANO	0.11823953	NA	NA	NA
5428	LANO0B06502g	1	0.4724	489	LANO	0.13798834	NA	NA	NA
5430	LANO0C01002g	1	0.5059	510	LANO	0.12814116	NA	NA	NA
5431	LANO0C01266g	1	0.4394	528	LANO	0.13353014	NA	NA	NA
5432	LANO0C02784g	1	0.4832	507	LANO	0.1015761	NA	NA	NA
5433	LANO0C03796g	1	0.4917	120	LANO	0.10592125	NA	NA	NA
5434	LANO0C04302g	1	0.5458	480	LANO	0.11395175	NA	NA	NA
5435	LANO0C09362g	1	0.4766	642	LANO	0.12783332	NA	NA	NA
5436	LANO0D01816g	1	0.5374	642	LANO	0.084179126	NA	NA	NA
5437	LANO0D02102g	1	0.5291	654	LANO	0.116180405	NA	NA	NA
5440	LANO0D10044g	1	0.5152	660	LANO	0.14254588	NA	NA	NA
5442	LANO0E02344g	1	0.481	501	LANO	0.094001785	NA	NA	NA
5443	LANO0E03400g	1	0.4857	453	LANO	0.09280081	NA	NA	NA
5444	LANO0E08790g	1	0.4611	501	LANO	0.1339627	NA	NA	NA
5445	LANO0E10990g	1	0.5597	477	LANO	0.10234258	NA	NA	NA
5446	LANO0E11012g	1	0.6015	537	LANO	0.07534299	NA	NA	NA
5447	LANO0E13696g	1	0.512	543	LANO	0.18207535	NA	NA	NA
5449	LANO0E15654g	1	0.488	459	LANO	0.05707409	NA	NA	NA
5450	LANO0E16336g	1	0.5453	519	LANO	0.07445289	NA	NA	NA
5452	LANO0F07998g	1	0.5497	855	LANO	0.09788538	NA	NA	NA
5453	LANO0F08878g	1	0.5498	522	LANO	0.080147274	NA	NA	NA
5454	LANO0F10396g	1	0.3222	90	LANO	0.048053354	NA	NA	NA
5455	LANO0F12178g	1	0.5475	453	LANO	0.11327944	NA	NA	NA
5456	LANO0F13168g	1	0.5697	495	LANO	0.04697852	NA	NA	NA
5457	LANO0F13212g	1	0.5008	609	LANO	0.08110266	NA	NA	NA
5458	LANO0F14796g	1	0.4908	489	LANO	0.11288269	NA	NA	NA
5459	LANO0F14994g	1	0.5022	462	LANO	0.11796235	NA	NA	NA
5460	LANO0F15412g	1	0.4675	462	LANO	0.11286836	NA	NA	NA
5461	LANO0F15434g	1	0.578	519	LANO	0.08289629	NA	NA	NA
5462	LANO0F17458g	1	0.4912	456	LANO	0.10499685	NA	NA	NA
5463	LANO0G06304g	1	0.5689	501	LANO	0.087839976	NA	NA	NA
5464	LANO0G06920g	1	0.4024	492	LANO	0.09962526	NA	NA	NA
5465	LANO0G07492g	1	0.4046	477	LANO	0.10903613	NA	NA	NA
5466	LANO0G08614g	1	0.5662	597	LANO	0.08444448	NA	NA	NA
5467	LANO0G11122g	1	0.5625	480	LANO	0.090394355	NA	NA	NA
5468	LANO0G15808g	1	0.5978	450	LANO	0.092660114	NA	NA	NA
5469	LANO0G18294g	1	0.4486	486	LANO	0.09060398	NA	NA	NA
5470	LANO0H00188g	1	0.5589	696	LANO	0.107641175	NA	NA	NA
5473	LANO0H02300g	1	0.503	501	LANO	0.09812552	NA	NA	NA
5474	LANO0H05776g	1	0.5105	525	LANO	0.11316817	NA	NA	NA
5475	LANO0H06832g	1	0.5471	510	LANO	0.09092108	NA	NA	NA
5476	LANO0H06854g	1	0.5104	480	LANO	0.09404212	NA	NA	NA
5477	LANO0H08790g	1	0.461	462	LANO	0.09849041	NA	NA	NA
5478	LANO0H11056g	1	0.3739	468	LANO	0.10216317	NA	NA	NA
5479	LANO0H12596g	1	0.5265	528	LANO	0.09461221	NA	NA	NA
5480	LANO0H13630g	1	0.4967	600	LANO	0.08813364	NA	NA	NA
5481	LANO0H18096g	1	0.5652	729	LANO	0.07377359	NA	NA	NA
5482	LANO0H19900g	1	0.5032	471	LANO	0.102451995	NA	NA	NA
5483	LANO0H19966g	1	0.5415	591	LANO	0.11082458	NA	NA	NA
5484	LANO0H20362g	1	0.5725	531	LANO	0.12269738	NA	NA	NA
5485	LANO0H23354g	1	0.4756	513	LANO	0.10144363	NA	NA	NA
5486	KLTH0A02871g	1	0.6589	516	KLTH	0.06291709	NA	NA	NA
5488	KLTH0B01518g	1	0.5449	345	KLTH	0.062182765	NA	NA	NA
5489	KLTH0B01947g	1	0.5085	468	KLTH	0.0986219	NA	NA	NA
5490	KLTH0B03982g	1	0.6463	639	KLTH	0.095422976	NA	NA	NA
5491	KLTH0B04081g	1	0.6331	507	KLTH	0.08034937	NA	NA	NA
5492	KLTH0B04785g	1	0.6175	468	KLTH	0.0733898	NA	NA	NA
5493	KLTH0B05027g	1	0.5689	450	KLTH	0.06416642	NA	NA	NA
5495	KLTH0B05093g	1	0.4956	450	KLTH	0.0822069	NA	NA	NA
5496	KLTH0B07524g	1	0.5087	519	KLTH	0.110947974	NA	NA	NA
5497	KLTH0B07733g	1	0.6333	660	KLTH	0.10705894	NA	NA	NA
5498	KLTH0B09710g	1	0.7297	555	KLTH	0.030990256	NA	NA	NA
5499	KLTH0B09717g	1	0.671	462	KLTH	0.045815375	NA	NA	NA
5500	KLTH0C01419g	1	0.6751	477	KLTH	0.09296501	NA	NA	NA
5501	KLTH0C01705g	1	0.379	525	KLTH	0.07238564	NA	NA	NA
5502	KLTH0C01738g	1	0.5085	234	KLTH	0.1244893	NA	NA	NA
5503	KLTH0C02563g	1	0.6366	465	KLTH	0.063802116	NA	NA	NA
5504	KLTH0C03267g	1	0.5632	522	KLTH	0.08697454	NA	NA	NA
5505	KLTH0C04928g	1	0.6355	513	KLTH	0.06433912	NA	NA	NA
5506	KLTH0C04939g	1	0.7015	459	KLTH	0.05852109	NA	NA	NA
5507	KLTH0C05896g	1	0.6093	819	KLTH	0.09512069	NA	NA	NA
5508	KLTH0C06424g	1	0.4021	291	KLTH	0.07811555	NA	NA	NA
5509	KLTH0C07106g	1	0.439	369	KLTH	0.074466154	NA	NA	NA
5510	KLTH0C07766g	1	0.5871	528	KLTH	0.114619546	NA	NA	NA
5511	KLTH0C09702g	1	0.4556	507	KLTH	0.08906543	NA	NA	NA
5512	KLTH0C09724g	1	0.4697	198	KLTH	0.10207224	NA	NA	NA
5513	KLTH0C10494g	1	0.4264	258	KLTH	0.11006462	NA	NA	NA
5514	KLTH0D00517g	1	0.5965	456	KLTH	0.045475576	NA	NA	NA
5515	KLTH0D00583g	1	0.4956	450	KLTH	0.082082585	NA	NA	NA
5516	KLTH0D01529g	1	0.5293	546	KLTH	0.07365288	NA	NA	NA
5517	KLTH0D03894g	1	0.5097	2121	KLTH	0.082570165	NA	NA	NA
5518	KLTH0D04279g	1	0.6298	543	KLTH	0.053390257	NA	NA	NA
5519	KLTH0D05610g	1	0.5214	723	KLTH	0.068356544	NA	NA	NA
5520	KLTH0D10362g	1	0.6653	729	KLTH	0.07449429	NA	NA	NA
5521	KLTH0D12562g	1	0.5807	384	KLTH	0.053746767	NA	NA	NA
5522	KLTH0D13662g	1	0.6011	732	KLTH	0.07462699	NA	NA	NA
5523	KLTH0D16676g	1	0.5706	333	KLTH	0.10720614	NA	NA	NA
5524	KLTH0D16830g	1	0.5514	486	KLTH	0.06340916	NA	NA	NA
5525	KLTH0D17072g	1	0.553	774	KLTH	0.07039874	NA	NA	NA
5526	KLTH0E00924g	1	0.624	375	KLTH	0.09524292	NA	NA	NA
5527	KLTH0E01430g	1	0.6526	285	KLTH	0.078273155	NA	NA	NA
5528	KLTH0E01771g	1	0.5922	510	KLTH	0.06646647	NA	NA	NA
5529	KLTH0E05159g	1	0.6368	468	KLTH	0.07431397	NA	NA	NA
5530	KLTH0E07161g	1	0.6554	624	KLTH	0.059088793	NA	NA	NA
5531	KLTH0E07953g	1	0.5693	462	KLTH	0.0776859	NA	NA	NA
5532	KLTH0E08745g	1	0.4989	471	KLTH	0.060631394	NA	NA	NA
5533	KLTH0E08789g	1	0.5988	840	KLTH	0.0818864	NA	NA	NA
5534	KLTH0E09460g	1	0.5564	771	KLTH	0.10181428	NA	NA	NA
5535	KLTH0E09526g	1	0.4762	609	KLTH	0.10552786	NA	NA	NA
5536	KLTH0E10384g	1	0.652	816	KLTH	0.0521454	NA	NA	NA
5537	KLTH0E11825g	1	0.6061	594	KLTH	0.08579903	NA	NA	NA
5538	KLTH0F01474g	1	0.4599	237	KLTH	0.10502959	NA	NA	NA
5539	KLTH0F01628g	1	0.5437	618	KLTH	0.067365795	NA	NA	NA
5540	KLTH0F01705g	1	0.5498	522	KLTH	0.07725176	NA	NA	NA
5541	KLTH0F03630g	1	0.5657	297	KLTH	0.11303802	NA	NA	NA
5542	KLTH0F03982g	1	0.4545	462	KLTH	0.08577595	NA	NA	NA
5543	KLTH0F04004g	1	0.4627	255	KLTH	0.101176515	NA	NA	NA
5544	KLTH0F04818g	1	0.4175	309	KLTH	0.10588304	NA	NA	NA
5545	KLTH0F13915g	1	0.6228	570	KLTH	0.051192455	NA	NA	NA
5546	KLTH0F15246g	1	0.6444	765	KLTH	0.066073634	NA	NA	NA
5547	KLTH0F15708g	1	0.4418	249	KLTH	0.14071445	NA	NA	NA
5548	KLTH0F15818g	1	0.3196	291	KLTH	0.08360778	NA	NA	NA
5549	KLTH0F15840g	1	0.5645	372	KLTH	0.10157126	NA	NA	NA
5550	KLTH0F17534g	1	0.586	645	KLTH	0.0962971	NA	NA	NA
5551	KLTH0G01430g	1	0.6607	501	KLTH	0.061919883	NA	NA	NA
5552	KLTH0G02750g	1	0.6096	456	KLTH	0.07632557	NA	NA	NA
5553	KLTH0G02838g	1	0.4759	456	KLTH	0.09265188	NA	NA	NA
5554	KLTH0G05764g	1	0.5748	555	KLTH	0.064068094	NA	NA	NA
5555	KLTH0G07194g	1	0.4933	525	KLTH	0.10250766	NA	NA	NA
5556	KLTH0G08041g	1	0.5264	492	KLTH	0.08557731	NA	NA	NA
5557	KLTH0G11176g	1	0.5955	576	KLTH	0.064749956	NA	NA	NA
5558	KLTH0G15290g	1	0.5286	297	KLTH	0.24200323	NA	NA	NA
5559	KLTH0G15708g	1	0.6196	957	KLTH	0.06569321	NA	NA	NA
5560	KLTH0G16962g	1	0.5181	552	KLTH	0.08972279	NA	NA	NA
5561	KLTH0G17039g	1	0.6356	579	KLTH	0.058541093	NA	NA	NA
5562	KLTH0G18425g	1	0.5628	462	KLTH	0.07130089	NA	NA	NA
5563	KLTH0G18458g	1	0.5637	738	KLTH	0.12033419	NA	NA	NA
5564	KLTH0G19492g	1	0.5968	315	KLTH	0.07524915	NA	NA	NA
5565	KLTH0G19734g	1	0.3909	243	KLTH	0.11432938	NA	NA	NA
5566	KLTH0H00748g	1	0.4422	303	KLTH	0.051048093	NA	NA	NA
5567	KLTH0H02233g	1	0.5244	471	KLTH	0.087849535	NA	NA	NA
5568	KLTH0H09845g	1	0.6123	552	KLTH	0.053490717	NA	NA	NA
5569	KLTH0H11462g	1	0.5881	675	KLTH	0.0568051	NA	NA	NA
5570	KLTH0H11880g	1	0.5182	687	KLTH	0.082814135	NA	NA	NA
5571	KLTH0H14575g	1	0.5785	465	KLTH	0.071160346	NA	NA	NA
5572	KLTH0H15466g	1	0.522	477	KLTH	0.09819394	NA	NA	NA
5573	KLTH0H15719g	1	0.6559	651	KLTH	0.052195176	NA	NA	NA
5574	KLTH0H16481g	1	0.4769	627	KLTH	0.12941207	NA	NA	NA
5575	LAWA0A09802g	1	0.5076	528	LAWA	0.07393483	NA	NA	NA
5577	LAWA0B01574g	1	0.4234	555	LAWA	0.08250628	NA	NA	NA
5579	LAWA0B05358g	1	0.624	516	LAWA	0.0962268	NA	NA	NA
5580	LAWA0B07184g	1	0.4626	495	LAWA	0.1381575	NA	NA	NA
5581	LAWA0B07800g	1	0.3598	528	LAWA	0.090493135	NA	NA	NA
5582	LAWA0B12266g	1	0.4726	402	LAWA	0.07665026	NA	NA	NA
5583	LAWA0B13124g	1	0.4191	513	LAWA	0.07296233	NA	NA	NA
5584	LAWA0C00584g	1	0.4893	468	LAWA	0.0979073	NA	NA	NA
5585	LAWA0C04808g	1	0.4744	78	LAWA	0.05034625	NA	NA	NA
5587	LAWA0C06480g	1	0.4494	474	LAWA	0.07461166	NA	NA	NA
5588	LAWA0C09978g	1	0.4861	720	LAWA	0.085560314	NA	NA	NA
5589	LAWA0D01420g	1	0.4734	507	LAWA	0.08825796	NA	NA	NA
5591	LAWA0D05600g	1	0.4845	741	LAWA	0.08180864	NA	NA	NA
5592	LAWA0D06238g	1	0.4832	567	LAWA	0.11993196	NA	NA	NA
5593	LAWA0D10550g	1	0.4945	732	LAWA	0.12304584	NA	NA	NA
5594	LAWA0D12574g	1	0.5156	642	LAWA	0.07750028	NA	NA	NA
5595	LAWA0E00958g	1	0.5043	462	LAWA	0.11197968	NA	NA	NA
5596	LAWA0E03972g	1	0.4584	1431	LAWA	0.099818096	NA	NA	NA
5597	LAWA0E10946g	1	0.4615	1842	LAWA	0.0516136	NA	NA	NA
5598	LAWA0E12244g	1	0.4697	462	LAWA	0.097400606	NA	NA	NA
5599	LAWA0E13080g	1	0.5064	468	LAWA	0.09942665	NA	NA	NA
5600	LAWA0E14510g	1	0.5079	567	LAWA	0.0652349	NA	NA	NA
5601	LAWA0F04060g	1	0.4822	450	LAWA	0.0867708	NA	NA	NA
5602	LAWA0F07162g	1	0.5009	573	LAWA	0.06264931	NA	NA	NA
5603	LAWA0F13410g	1	0.6012	168	LAWA	0.81450564	NA	NA	NA
5604	LAWA0F15478g	1	0.5921	456	LAWA	0.079815105	NA	NA	NA
5605	LAWA0G03928g	1	0.3992	243	LAWA	0.07824029	NA	NA	NA
5606	LAWA0G04280g	1	0.4601	576	LAWA	0.09953827	NA	NA	NA
5608	LAWA0G08460g	1	0.5	636	LAWA	0.13826653	NA	NA	NA
5610	LAWA0G16446g	1	0.4292	480	LAWA	0.07090448	NA	NA	NA
5611	LAWA0H02696g	1	0.5292	480	LAWA	0.10447881	NA	NA	NA
5612	LAWA0H02718g	1	0.4748	615	LAWA	0.095126964	NA	NA	NA
5613	LAWA0H07690g	1	0.4565	609	LAWA	0.09136913	NA	NA	NA
5614	LAWA0H09978g	1	0.607	486	LAWA	0.06011176	NA	NA	NA
