# Supplementary material for: Reconstruction of ancestral chromosome architecture and gene repertoire reveals principles of genome evolution in a model yeast genus
Source: HighWire-hosted journal article supplement (doi:10.1101/gr.204420.116), 2016-05-31
Supplement: Supplemental_Table_S6.xlsx [file Supplemental_Table_S6.xlsx]

## Sheet: L.A1
Ancestor	Ancest gene name	chr	strand	ID/chr	ID/genome	LANO	LAME	ZYRO	LAWA	LACI	LAFE	LADA	LAFA	LAMI	SAKL	KLTH
L.A1	A1LA01-108384g	1	-	1	1	LANO0G18228g	LAME0A00672g	ZYRO0G07458g		LACI0F11298g	LAFE0D00474g	LADA0F00364g	LAFA0A07624g	LAMI0E16424g	SAKL0H26202g
L.A1	A1LA01-108362g	1	+	2	2	LANO0G18206g	LAME0A00694g	ZYRO0G07480g		LACI0F11276g	LAFE0D00496g	LADA0F00386g	LAFA0A07602g	LAMI0E16402g	SAKL0H26180g
L.A1	A1LA01-108340g	1	+	3	3	LANO0G18184g	LAME0A00716g	ZYRO0G07502g	LAWA0H14246g		LAFE0D00584g	LADA0F00518g	LAFA0A07580g	LAMI0D13322g	SAKL0H26158g	KLTH0H16126g
L.A1	A1LA01-108318g	1	-	4	4	LANO0G18162g	LAME0A00738g	ZYRO0G07524g	LAWA0H14224g	LACI0F11232g	LAFE0D00628g	LADA0F00540g	LAFA0A07558g	LAMI0D13300g	SAKL0H26114g	KLTH0H16104g
L.A1	A1LA01-108296g	1	+	5	5	LANO0G18140g	LAME0A00760g	ZYRO0G07546g	LAWA0H14202g	LACI0F11210g	LAFE0D00650g	LADA0F00562g	LAFA0A07536g		SAKL0H26092g	KLTH0H16082g
L.A1	A1LA01-108274g	1	-	6	6	LANO0G18118g	LAME0A00782g	ZYRO0G07568g	LAWA0H14180g	LACI0F11188g	LAFE0D00672g	LADA0F00584g	LAFA0A07514g	LAMI0D13278g	SAKL0H26070g	KLTH0H16060g
L.A1	A1LA01-108252g	1	+	7	7	LANO0G18096g	LAME0A00804g	ZYRO0G07590g	LAWA0H14158g	LACI0F11166g	LAFE0D00694g	LADA0F00606g	LAFA0A07492g	LAMI0D13256g	SAKL0H26048g
L.A1	A1LA01-108230g	1	-	8	8	LANO0G18074g	LAME0A00826g	ZYRO0G07612g		LACI0F11144g	LAFE0D00716g	LADA0F00628g	LAFA0A07668g	LAMI0D13234g	SAKL0H26026g	KLTH0H16038g
L.A1	A1LA01-108208g	1	-	9	9			ZYRO0G07634g		LACI0F14224g	LAFE0E09032g				SAKL0H26004g
L.A1	A1LA01-108186g	1	-	10	10	LANO0F09428g	LAME0H17128g	ZYRO0G07656g		LACI0F06436g	LAFE0D05358g	LADA0G02784g	LAFA0D12684g	LAMI0H05710g	SAKL0H25960g	KLTH0E05632g
L.A1	A1LA01-108164g	1	-	11	11	LANO0F09406g	LAME0H17106g	ZYRO0G07700g		LACI0F06458g	LAFE0D05336g	LADA0G02806g	LAFA0D12662g	LAMI0H05732g	SAKL0H25938g	KLTH0E05654g
L.A1	A1LA01-108142g	1	+	12	12	LANO0F09384g	LAME0H17062g	ZYRO0G07722g	LAWA0B04940g	LACI0F06480g	LAFE0D05314g	LADA0G02850g	LAFA0D12618g	LAMI0F04786g	SAKL0H25916g	KLTH0E05676g
L.A1	A1LA01-108120g	1	-	13	13	LANO0F09362g	LAME0H17040g	ZYRO0G07744g	LAWA0B04962g	LACI0F06502g	LAFE0D05292g	LADA0G02872g	LAFA0D12596g	LAMI0F04808g	SAKL0H25894g	KLTH0E05698g
L.A1	A1LA01-108098g	1	-	14	14	LANO0F09340g	LAME0H17018g	ZYRO0G07766g	LAWA0B04984g	LACI0F06524g	LAFE0D05270g	LADA0G02894g	LAFA0D12574g	LAMI0F04830g	SAKL0H25872g	KLTH0E05720g
L.A1	A1LA01-108076g	1	-	15	15	LANO0F09318g	LAME0H16996g	ZYRO0G07788g	LAWA0B05006g	LACI0F06546g	LAFE0D05248g	LADA0G02916g	LAFA0D12552g	LAMI0F04852g	SAKL0H25850g	KLTH0E05742g
L.A1	A1LA01-108054g	1	-	16	16	LANO0F09296g	LAME0H16974g	ZYRO0G07810g		LACI0F06568g	LAFE0D05226g	LADA0G02938g	LAFA0D12530g	LAMI0F04874g	SAKL0H25828g	KLTH0E05764g
L.A1	A1LA01-108032g	1	+	17	17	LANO0F09274g	LAME0H16952g	ZYRO0G07832g	LAWA0B05050g	LACI0F06590g	LAFE0D05204g	LADA0G02960g	LAFA0D12508g	LAMI0F04896g	SAKL0H25806g	KLTH0E05830g
L.A1	A1LA01-108010g	1	-	18	18	LANO0F09252g	LAME0H16930g	ZYRO0G07854g	LAWA0B05072g		LAFE0D05182g	LADA0G02982g	LAFA0D12486g		SAKL0H25784g	KLTH0E05852g
L.A1	A1LA01-107988g	1	-	19	19	LANO0F09230g	LAME0H16908g	ZYRO0G07876g	LAWA0B05094g	LACI0F06634g	LAFE0D05160g	LADA0G03004g	LAFA0D12464g	LAMI0F04962g	SAKL0H25762g	KLTH0E05874g
L.A1	A1LA01-107966g	1	-	20	20	LANO0F09208g	LAME0H16886g	ZYRO0G07898g	LAWA0B05116g	LACI0F06656g	LAFE0D05138g	LADA0G03026g	LAFA0D12442g	LAMI0F04984g	SAKL0H25740g	KLTH0E05896g
L.A1	A1LA01-107944g	1	-	21	21	LANO0F09186g	LAME0H16864g	ZYRO0G07920g		LACI0F06678g	LAFE0D05116g	LADA0G03048g	LAFA0D12420g	LAMI0F05006g	SAKL0H25718g	KLTH0E05918g
L.A1	A1LA01-107900g	1	+	22	22	LANO0F09142g	LAME0H16820g	ZYRO0G07964g	LAWA0B05182g	LACI0F06722g	LAFE0D05050g	LADA0G03092g	LAFA0D12376g	LAMI0F05050g	SAKL0H25674g	KLTH0E05962g
L.A1	A1LA01-107878g	1	+	23	23	LANO0F09120g	LAME0H16798g	ZYRO0G07986g	LAWA0B05204g	LACI0F06744g	LAFE0D05028g	LADA0G03114g	LAFA0D12354g	LAMI0F05072g	SAKL0H25652g	KLTH0E05984g
L.A1	A1LA01-107856g	1	-	24	24	LANO0F09098g	LAME0H16776g	ZYRO0G08008g	LAWA0B05226g	LACI0F06766g	LAFE0D05006g	LADA0G03136g	LAFA0D12332g	LAMI0F05094g	SAKL0H25630g	KLTH0E06006g
L.A1	A1LA01-107834g	1	+	25	25	LANO0F09076g	LAME0H16754g	ZYRO0G03608g	LAWA0B05248g	LACI0F06788g	LAFE0D04984g	LADA0G03158g	LAFA0D12310g	LAMI0F05116g	SAKL0H25608g	KLTH0E06028g
L.A1	A1LA01-107812g	1	-	26	26	LANO0F09054g	LAME0H16732g	ZYRO0G03630g	LAWA0B05270g	LACI0F06810g	LAFE0D04962g	LADA0G03180g	LAFA0D12288g	LAMI0C01442g	SAKL0H25586g	KLTH0E06050g
L.A1	A1LA01-107790g	1	+	27	27	LANO0F09032g	LAME0H16710g	ZYRO0B01056g	LAWA0B05292g	LACI0F06832g	LAFE0D04940g	LADA0G03202g	LAFA0D12266g	LAMI0C01464g	SAKL0H25564g	KLTH0E06072g
L.A1	A1LA01-107768g	1	-	28	28	LANO0F09010g	LAME0H16688g	ZYRO0B01034g		LACI0F06854g	LAFE0D04918g	LADA0G03224g	LAFA0D12244g	LAMI0C01486g	SAKL0H25542g	KLTH0E06094g
L.A1	A1LA01-107702g	1	+	29	29	LANO0F08944g	LAME0H16622g	ZYRO0B01012g	LAWA0B05402g	LACI0F06920g	LAFE0D04852g	LADA0G03290g	LAFA0D12200g	LAMI0C01552g	SAKL0H25476g	KLTH0E06160g
L.A1	A1LA01-107680g	1	+	30	30	LANO0F08922g	LAME0H16600g	ZYRO0B00968g	LAWA0B05424g	LACI0F06942g	LAFE0D04830g	LADA0G03312g	LAFA0D12178g	LAMI0C01574g	SAKL0H25454g	KLTH0E06182g
L.A1	A1LA01-107658g	1	+	31	31	LANO0F08900g	LAME0H16578g	ZYRO0B00946g	LAWA0B05446g	LACI0F06964g	LAFE0D04808g	LADA0G03334g	LAFA0D12156g	LAMI0C01596g	SAKL0H25388g	KLTH0E06204g
L.A1	A1LA01-107636g	1	+	32	32	LANO0F08856g	LAME0H16534g	ZYRO0B00924g		LACI0F06986g	LAFE0D04786g	LADA0G03356g	LAFA0D12112g	LAMI0D07756g	SAKL0H25366g	KLTH0E06226g
L.A1	A1LA01-107614g	1	-	33	33	LANO0F08834g	LAME0H16512g	ZYRO0B00902g	LAWA0B05512g	LACI0F07008g	LAFE0D04764g	LADA0G03378g	LAFA0D12090g	LAMI0D07734g	SAKL0H25344g	KLTH0E06248g
L.A1	A1LA01-107592g	1	-	34	34	LANO0F08812g	LAME0H16490g	ZYRO0G19514g	LAWA0B05556g	LACI0F07052g	LAFE0D04742g	LADA0G03400g	LAFA0D12068g	LAMI0D07712g	SAKL0H25300g	KLTH0E06292g
L.A1	A1LA01-107570g	1	-	35	35	LANO0F08790g	LAME0H16468g	ZYRO0G19492g	LAWA0B05578g	LACI0F07074g	LAFE0D04720g	LADA0G03422g	LAFA0D12024g	LAMI0D07690g	SAKL0H25278g	KLTH0E06314g
L.A1	A1LA01-107548g	1	+	36	36	LANO0F08768g	LAME0H16446g	ZYRO0G19448g	LAWA0B05600g	LACI0F07096g	LAFE0D04698g	LADA0G03444g	LAFA0D11980g	LAMI0D07668g	SAKL0H25234g	KLTH0E06358g
L.A1	A1LA01-107526g	1	+	37	37	LANO0F08746g	LAME0H16424g	ZYRO0G19426g	LAWA0B05622g	LACI0F07118g	LAFE0D04676g	LADA0G03466g	LAFA0D11958g	LAMI0D07646g	SAKL0H25212g	KLTH0E06380g
L.A1	A1LA01-107504g	1	+	38	38			ZYRO0G19404g		LACI0F07140g	LAFE0D04654g				SAKL0H25190g
L.A1	A1LA01-107482g	1	+	39	39	LANO0F08724g	LAME0H16402g	ZYRO0G19360g	LAWA0B05644g	LACI0F07162g	LAFE0D04632g	LADA0G03488g	LAFA0D11936g	LAMI0D07624g	SAKL0H25168g	KLTH0E06424g
L.A1	A1LA01-107438g	1	+	40	40			ZYRO0G19338g		LACI0F07206g	LAFE0D04588g			LAMI0D07580g	SAKL0H25146g
L.A1	A1LA01-107416g	1	-	41	41	LANO0F08680g	LAME0H16358g	ZYRO0G19316g	LAWA0B05688g	LACI0F07228g	LAFE0D04566g	LADA0G03532g	LAFA0D11892g	LAMI0D07558g	SAKL0H25124g	KLTH0E06446g
L.A1	A1LA01-107394g	1	+	42	42	LANO0F08658g	LAME0H16336g	ZYRO0G19294g	LAWA0B05710g	LACI0F07250g	LAFE0D04544g	LADA0G03554g	LAFA0D11870g	LAMI0D07536g	SAKL0H25102g	KLTH0E06468g
L.A1	A1LA01-107372g	1	+	43	43	LANO0F08636g	LAME0H16314g	ZYRO0G19272g	LAWA0D03224g	LACI0F07294g	LAFE0D04522g	LADA0G03576g	LAFA0D11848g	LAMI0D07514g	SAKL0H25036g	KLTH0E06512g
L.A1	A1LA01-107350g	1	-	44	44	LANO0F08614g	LAME0H16292g	ZYRO0G19250g		LACI0F07316g	LAFE0D04500g	LADA0G03598g	LAFA0D11826g	LAMI0D07492g	SAKL0H25014g	KLTH0E06534g
L.A1	A1LA01-107328g	1	-	45	45	LANO0F08592g	LAME0H16270g	ZYRO0G19228g	LAWA0D03268g	LACI0F07338g	LAFE0D04478g	LADA0G03620g	LAFA0D11804g	LAMI0D07470g	SAKL0H24992g	KLTH0E06556g
L.A1	A1LA01-107306g	1	-	46	46	LANO0F08570g	LAME0H16248g	ZYRO0G19206g	LAWA0D03290g	LACI0F07360g	LAFE0D04456g	LADA0G03642g	LAFA0D11782g	LAMI0D07448g	SAKL0H24970g	KLTH0E06578g
L.A1	A1LA01-107262g	1	-	47	47	LANO0F08526g	LAME0H16204g	ZYRO0G19184g		LACI0F07426g	LAFE0D04390g	LADA0G03686g	LAFA0D11738g	LAMI0D07404g	SAKL0H24904g	KLTH0E06622g
L.A1	A1LA01-107240g	1	-	48	48	LANO0F08504g	LAME0H16182g	ZYRO0G19162g	LAWA0D03334g	LACI0F07448g	LAFE0D04368g	LADA0G03708g	LAFA0D11716g	LAMI0D07382g	SAKL0H24882g	KLTH0E06644g
L.A1	A1LA01-107196g	1	+	49	49	LANO0F08460g	LAME0H16138g	ZYRO0G19140g	LAWA0D03378g	LACI0F07492g	LAFE0D04324g	LADA0G03752g	LAFA0D11672g	LAMI0D07338g	SAKL0H24816g	KLTH0E06688g
L.A1	A1LA01-107174g	1	-	50	50	LANO0F08438g	LAME0H16116g	ZYRO0G19118g	LAWA0D03400g	LACI0F07514g	LAFE0D04302g	LADA0G03774g	LAFA0D11650g	LAMI0D07316g	SAKL0H24794g	KLTH0E06710g
L.A1	A1LA01-107152g	1	+	51	51	LANO0F08416g	LAME0H16094g	ZYRO0G19096g	LAWA0D03422g	LACI0F07536g	LAFE0D04280g	LADA0G03796g	LAFA0D11628g	LAMI0D07294g	SAKL0H24772g	KLTH0E06732g
L.A1	A1LA01-107130g	1	+	52	52	LANO0F08394g	LAME0H16072g	ZYRO0G19074g	LAWA0D03444g	LACI0F07558g	LAFE0D04258g	LADA0G03818g	LAFA0D11606g	LAMI0D07272g	SAKL0H24750g	KLTH0E06754g
L.A1	A1LA01-107108g	1	-	53	53	LANO0F08372g	LAME0H16050g	ZYRO0G19052g	LAWA0D03466g	LACI0F07580g	LAFE0D04236g	LADA0G03840g	LAFA0D11584g	LAMI0D07250g	SAKL0H24706g	KLTH0E06776g
L.A1	A1LA01-107086g	1	-	54	54	LANO0F08350g	LAME0H16028g	ZYRO0G19030g	LAWA0D03488g	LACI0F07602g	LAFE0D04214g	LADA0G03862g	LAFA0D11562g	LAMI0D07228g	SAKL0H24684g	KLTH0E06798g
L.A1	A1LA01-107064g	1	-	55	55	LANO0F08328g	LAME0H16006g	ZYRO0G19008g	LAWA0D03510g	LACI0F07624g	LAFE0D04192g	LADA0G03884g	LAFA0D11540g	LAMI0D07206g	SAKL0H24662g	KLTH0E06820g
L.A1	A1LA01-107042g	1	+	56	56	LANO0F08306g	LAME0H15984g	ZYRO0G18986g	LAWA0D03532g	LACI0F07646g	LAFE0D04170g	LADA0G03906g	LAFA0D11518g	LAMI0D07184g	SAKL0H24640g	KLTH0E06842g
L.A1	A1LA01-107020g	1	+	57	57	LANO0F08284g	LAME0H15962g	ZYRO0G18964g		LACI0F07668g	LAFE0D04126g	LADA0G03928g	LAFA0D11496g	LAMI0D07162g	SAKL0H24596g	KLTH0E06864g
L.A1	A1LA01-106998g	1	-	58	58	LANO0F08262g	LAME0H15940g	ZYRO0G18942g	LAWA0D03620g	LACI0F07690g	LAFE0D04104g		LAFA0D11474g	LAMI0D07140g	SAKL0H24574g	KLTH0E06886g
L.A1	A1LA01-106976g	1	-	59	59	LANO0F08240g	LAME0H15918g	ZYRO0G18920g	LAWA0D03642g	LACI0F07712g	LAFE0D04082g	LADA0G03950g	LAFA0D11452g	LAMI0D07118g	SAKL0H24552g	KLTH0E06908g
L.A1	A1LA01-106954g	1	+	60	60	LANO0F08218g	LAME0H15896g	ZYRO0E02354g	LAWA0D03664g	LACI0F07734g	LAFE0D04060g	LADA0G03972g	LAFA0D11430g	LAMI0D07096g	SAKL0H24530g	KLTH0E06930g
L.A1	A1LA01-106932g	1	-	61	61	LANO0F08196g	LAME0H15874g	ZYRO0E02376g	LAWA0D03686g	LACI0F07756g	LAFE0D04038g	LADA0G03994g	LAFA0D11408g	LAMI0D07074g	SAKL0H24508g	KLTH0E06952g
L.A1	A1LA01-106910g	1	+	62	62	LANO0F08174g	LAME0H15852g	ZYRO0E02398g	LAWA0D03708g	LACI0F07778g	LAFE0D04016g	LADA0G04016g	LAFA0D11386g		SAKL0H24486g	KLTH0E06974g
L.A1	A1LA01-106866g	1	+	63	63	LANO0F08152g	LAME0F00782g	ZYRO0E02420g	LAWA0D03730g	LACI0F07822g	LAFE0D03972g	LADA0G04038g	LAFA0D11364g	LAMI0D07030g	SAKL0H24442g	KLTH0E06996g
L.A1	A1LA01-106844g	1	-	64	64	LANO0F08130g	LAME0F00804g	ZYRO0E02442g	LAWA0D03752g	LACI0F07844g	LAFE0D03950g	LADA0G04060g	LAFA0D11342g	LAMI0D07008g	SAKL0H24420g	KLTH0E07018g
L.A1	A1LA01-106822g	1	+	65	65	LANO0F08108g	LAME0F00826g	ZYRO0E02464g	LAWA0D03774g	LACI0F07866g	LAFE0D03928g	LADA0G04082g	LAFA0D11320g	LAMI0D06986g	SAKL0H24398g	KLTH0E07040g
L.A1	A1LA01-106800g	1	-	66	66	LANO0F08086g	LAME0F00848g	ZYRO0E02486g	LAWA0D03796g	LACI0F07888g	LAFE0D03906g	LADA0G04104g	LAFA0D11298g	LAMI0D06964g	SAKL0H24376g	KLTH0E07062g
L.A1	A1LA01-106778g	1	+	67	67	LANO0F08064g	LAME0F00870g	ZYRO0E02508g		LACI0F07910g	LAFE0D03884g	LADA0G04126g	LAFA0D11276g	LAMI0D06942g	SAKL0H24354g	KLTH0E07084g
L.A1	A1LA01-106756g	1	+	68	68	LANO0F08042g	LAME0F00892g	ZYRO0B00682g	LAWA0D03840g	LACI0F07932g	LAFE0D03862g	LADA0G04148g	LAFA0D11254g	LAMI0D06920g	SAKL0H24310g	KLTH0E07106g
L.A1	A1LA01-106734g	1	-	69	69	LANO0F08020g	LAME0F00914g	ZYRO0B00638g	LAWA0D03862g	LACI0F07954g	LAFE0D03840g	LADA0G04170g	LAFA0D11232g	LAMI0D06898g	SAKL0H24288g	KLTH0E07128g
L.A1	A1LA01-106712g	1	-	70	70	LANO0F05358g	LAME0H03378g	ZYRO0B00572g		LACI0H16050g	LAFE0H12772g	LADA0H11760g	LAFA0D11232g	LAMI0H13982g	SAKL0H24266g	KLTH0H09372g
L.A1	A1LA01-106690g	1	-	71	71	LANO0F05380g	LAME0H03400g	ZYRO0B00550g		LACI0H16072g	LAFE0H12794g	LADA0H11782g	LAFA0E16798g	LAMI0H14004g	SAKL0H24244g	KLTH0H09394g
L.A1	A1LA01-106668g	1	+	72	72	LANO0F05402g	LAME0H03422g	ZYRO0B00506g	LAWA0H07888g	LACI0H16094g	LAFE0H12816g	LADA0H11804g	LAFA0E16776g	LAMI0H14026g	SAKL0H24222g	KLTH0H09416g
L.A1	A1LA01-106646g	1	+	73	73	LANO0F05424g	LAME0H03444g	ZYRO0B00484g	LAWA0H07910g	LACI0H16116g	LAFE0H12838g	LADA0H11826g	LAFA0E16754g	LAMI0H14048g	SAKL0H24200g	KLTH0H09438g
L.A1	A1LA01-106602g	1	-	74	74	LANO0F05468g	LAME0H03466g	ZYRO0B00462g	LAWA0H07932g	LACI0H16138g	LAFE0H12882g	LADA0H11870g	LAFA0E16732g	LAMI0H14092g	SAKL0H24156g	KLTH0H09482g
L.A1	A1LA01-106558g	1	-	75	75	LANO0F05490g	LAME0H03488g	ZYRO0G19910g	LAWA0H07976g	LACI0H16182g	LAFE0H12926g	LADA0H11892g	LAFA0E16710g	LAMI0H14136g	SAKL0H24112g	KLTH0H09504g
L.A1	A1LA01-106536g	1	+	76	76	LANO0D08328g	LAME0A05402g	ZYRO0G19888g	LAWA0E03664g	LACI0F10440g	LAFE0D01464g	LADA0C09648g	LAFA0A03004g	LAMI0G06128g	SAKL0H24068g	KLTH0D03608g
L.A1	A1LA01-106514g	1	+	77	77	LANO0D08306g	LAME0A05380g	ZYRO0G22154g	LAWA0E03686g	LACI0F10418g	LAFE0D01486g	LADA0C09626g	LAFA0A03026g	LAMI0G06106g	SAKL0H24046g	KLTH0D03630g
L.A1	A1LA01-106492g	1	+	78	78	LANO0D08284g	LAME0A05358g	ZYRO0G22176g		LACI0F10374g	LAFE0D01508g	LADA0C09604g	LAFA0A03048g	LAMI0G06084g	SAKL0H23958g
L.A1	A1LA01-106470g	1	-	79	79	LANO0D08262g	LAME0A05336g	ZYRO0G22198g	LAWA0E03708g	LACI0F10352g	LAFE0D01530g	LADA0C09582g	LAFA0A03070g	LAMI0G06062g	SAKL0H23892g	KLTH0D03652g
L.A1	A1LA01-106448g	1	-	80	80	LANO0D08196g	LAME0A05292g	ZYRO0G22264g	LAWA0E03796g	LACI0F10242g	LAFE0D01640g	LADA0C09560g	LAFA0A03114g	LAMI0G05996g	SAKL0H23738g	KLTH0D03740g
L.A1	A1LA01-106426g	1	+	81	81	LANO0D08174g	LAME0A05270g	ZYRO0G22286g	LAWA0E03818g	LACI0F10220g	LAFE0D01662g	LADA0C09538g	LAFA0A03136g	LAMI0G05974g	SAKL0H23716g	KLTH0D03762g
L.A1	A1LA01-106404g	1	-	82	82	LANO0D08152g	LAME0A05248g	ZYRO0G22308g	LAWA0E03840g	LACI0F10198g	LAFE0D01684g	LADA0C09516g	LAFA0A03158g	LAMI0G05952g	SAKL0H23694g	KLTH0D03784g
L.A1	A1LA01-106382g	1	-	83	83	LANO0D08130g	LAME0A05226g	ZYRO0G22330g	LAWA0E03862g	LACI0F10176g	LAFE0D01706g	LADA0C09494g	LAFA0A03180g	LAMI0G05930g	SAKL0H23672g	KLTH0D03806g
L.A1	A1LA01-106360g	1	+	84	84	LANO0D08108g	LAME0A05204g	ZYRO0G22352g	LAWA0E03884g	LACI0F10154g	LAFE0D01728g	LADA0C09472g	LAFA0A03202g	LAMI0G05908g	SAKL0H23650g	KLTH0D03828g
L.A1	A1LA01-106316g	1	+	85	85	LANO0D08042g	LAME0A05138g	ZYRO0G07326g		LACI0F10088g	LAFE0D01772g	LADA0C09406g	LAFA0A03268g	LAMI0G05842g	SAKL0H23562g	KLTH0D03916g
L.A1	A1LA01-106294g	1	+	86	86	LANO0D08020g	LAME0A05116g	ZYRO0G07304g		LACI0F10066g	LAFE0D01794g	LADA0C09384g	LAFA0A03290g	LAMI0G05820g	SAKL0H23540g	KLTH0D03938g
L.A1	A1LA01-106272g	1	+	87	87	LANO0D07998g	LAME0A05094g	ZYRO0G07282g		LACI0F10044g	LAFE0D01816g	LADA0C09362g	LAFA0A03312g	LAMI0G05798g	SAKL0H23518g	KLTH0D03960g
L.A1	A1LA01-106250g	1	-	88	88	LANO0D07976g	LAME0A05072g	ZYRO0G07260g		LACI0F10022g	LAFE0D01838g	LADA0C09340g	LAFA0A03334g	LAMI0G05776g	SAKL0H23496g	KLTH0D03982g
L.A1	A1LA01-106228g	1	-	89	89	LANO0D07954g	LAME0A05050g	ZYRO0G07084g	LAWA0E04038g	LACI0F10000g	LAFE0D01860g	LADA0C09318g	LAFA0A03356g	LAMI0G05754g	SAKL0H23452g	KLTH0D04004g
L.A1	A1LA01-106206g	1	+	90	90	LANO0D07932g	LAME0A05028g	ZYRO0G07106g	LAWA0E04060g	LACI0F09978g	LAFE0D01882g	LADA0C09296g	LAFA0A03378g	LAMI0G05732g	SAKL0H23430g	KLTH0D04026g
L.A1	A1LA01-106140g	1	+	91	91	LANO0D07866g	LAME0A04962g	ZYRO0G07128g	LAWA0E04126g	LACI0F09912g	LAFE0D01948g	LADA0C09252g	LAFA0A03422g	LAMI0G05688g	SAKL0H23364g	KLTH0D04092g
L.A1	A1LA01-106118g	1	-	92	92	LANO0D07844g	LAME0A04940g	ZYRO0G07150g	LAWA0E04148g	LACI0F09890g	LAFE0D01970g	LADA0C09230g	LAFA0A03444g	LAMI0G05666g	SAKL0H23342g	KLTH0D04114g
L.A1	A1LA01-106096g	1	-	93	93	LANO0D07822g	LAME0A04918g	ZYRO0G07194g	LAWA0E04170g	LACI0F09868g	LAFE0D01992g	LADA0C09208g	LAFA0A03466g	LAMI0G05644g	SAKL0H23320g	KLTH0D04136g
L.A1	A1LA01-106074g	1	+	94	94	LANO0D07800g	LAME0A04896g	ZYRO0G07216g	LAWA0E04192g	LACI0F09846g	LAFE0D02014g	LADA0C09186g	LAFA0A03488g	LAMI0G05622g	SAKL0H23298g	KLTH0D04158g
L.A1	A1LA01-106052g	1	+	95	95	LANO0D07778g	LAME0A04874g	ZYRO0G07238g	LAWA0E04214g	LACI0F09824g	LAFE0D02036g	LADA0C09164g	LAFA0A03510g	LAMI0G05600g	SAKL0H23276g	KLTH0D04180g
L.A1	A1LA01-106030g	1	+	96	96	LANO0H02388g	LAME0F18184g	ZYRO0G11308g	LAWA0D05732g	LACI0F09780g	LAFE0D02058g	LADA0E01794g	LAFA0F11738g		SAKL0H23254g	KLTH0E08899g
L.A1	A1LA01-106008g	1	-	97	97	LANO0H02366g	LAME0F18206g	ZYRO0G11286g	LAWA0D05710g	LACI0F09758g	LAFE0D02080g	LADA0E01772g	LAFA0F11760g	LAMI0D00496g	SAKL0H23232g	KLTH0E08888g
L.A1	A1LA01-105986g	1	+	98	98	LANO0H02344g	LAME0F18228g	ZYRO0G11264g	LAWA0D05688g	LACI0F09736g	LAFE0D02102g	LADA0E01750g	LAFA0F11782g	LAMI0D00518g	SAKL0H23210g	KLTH0E08866g
L.A1	A1LA01-105964g	1	-	99	99	LANO0H02322g	LAME0F18250g	ZYRO0G11242g	LAWA0D05666g	LACI0F09714g	LAFE0D02124g	LADA0E01728g	LAFA0F11804g	LAMI0D00540g	SAKL0H23188g	KLTH0E08745g
L.A1	A1LA01-105942g	1	-	100	100	LANO0H02278g	LAME0F18272g	ZYRO0G11220g	LAWA0D05644g	LACI0F09692g	LAFE0D02146g	LADA0E01706g	LAFA0F11826g	LAMI0D00562g	SAKL0H23166g	KLTH0E08822g
L.A1	A1LA01-105920g	1	-	101	101	LANO0H02256g	LAME0F18294g	ZYRO0G11198g	LAWA0D05622g	LACI0F09670g	LAFE0D02168g	LADA0E01684g	LAFA0F11848g	LAMI0D00584g	SAKL0H23144g	KLTH0E08800g
L.A1	A1LA01-105898g	1	-	102	102			ZYRO0G11176g		LACI0F09626g	LAFE0D02234g				SAKL0H23122g
L.A1	A1LA01-105876g	1	-	103	103	LANO0H02212g	LAME0F18338g	ZYRO0G11154g	LAWA0D05556g	LACI0F09604g	LAFE0D02256g	LADA0E01662g	LAFA0F11914g	LAMI0D05424g	SAKL0H23100g	KLTH0E08756g
L.A1	A1LA01-105854g	1	+	104	104	LANO0F06436g	LAME0H04412g	ZYRO0G11110g	LAWA0D05512g	LACI0F09582g	LAFE0D02278g	LADA0C04522g	LAFA0E07206g	LAMI0D05446g	SAKL0H23034g	KLTH0E08734g
L.A1	A1LA01-105832g	1	-	105	105	LANO0F06458g	LAME0H04434g	ZYRO0G11088g	LAWA0D05490g	LACI0F09560g	LAFE0D02300g	LADA0C04544g	LAFA0E07228g	LAMI0D05468g	SAKL0H23012g	KLTH0E08712g
L.A1	A1LA01-105810g	1	-	106	106	LANO0F06480g	LAME0H04456g	ZYRO0G11066g	LAWA0D05468g	LACI0F09538g	LAFE0D02322g	LADA0C04566g	LAFA0E07250g	LAMI0D05490g	SAKL0H22990g	KLTH0E08690g
L.A1	A1LA01-105788g	1	-	107	107	LANO0F06502g	LAME0H04478g	ZYRO0G11044g	LAWA0D05446g	LACI0F09516g	LAFE0D02344g	LADA0C04588g	LAFA0E07272g	LAMI0D05512g	SAKL0H22968g	KLTH0E08668g
L.A1	A1LA01-105766g	1	+	108	108	LANO0F06524g	LAME0H04500g	ZYRO0G11022g	LAWA0D05424g	LACI0F09494g	LAFE0D02366g	LADA0C04610g	LAFA0E07294g	LAMI0D05534g	SAKL0H22946g	KLTH0E08646g
L.A1	A1LA01-105744g	1	+	109	109	LANO0F06546g	LAME0H04522g	ZYRO0G11000g	LAWA0D05402g	LACI0F09472g	LAFE0D02388g	LADA0C04632g	LAFA0E07316g	LAMI0D05556g	SAKL0H22924g	KLTH0E08624g
L.A1	A1LA01-105722g	1	-	110	110	LANO0F06568g	LAME0H04544g	ZYRO0G10978g	LAWA0D05380g	LACI0F09450g	LAFE0D02410g	LADA0C04654g	LAFA0E07338g	LAMI0D05578g	SAKL0H22902g	KLTH0E08602g
L.A1	A1LA01-105700g	1	+	111	111	LANO0F06590g	LAME0H04566g	ZYRO0G10956g	LAWA0D05358g	LACI0F09428g	LAFE0D02432g	LADA0C04676g	LAFA0E07360g	LAMI0D05600g	SAKL0H22880g	KLTH0E08580g
L.A1	A1LA01-105678g	1	-	112	112	LANO0F06612g	LAME0H04588g	ZYRO0G10934g	LAWA0D05336g	LACI0F09406g	LAFE0D02454g	LADA0C04698g	LAFA0E07382g	LAMI0D05622g	SAKL0H22858g	KLTH0E08558g
L.A1	A1LA01-105656g	1	+	113	113	LANO0F06634g	LAME0H04610g	ZYRO0G10912g	LAWA0D05314g	LACI0F09384g	LAFE0D02476g	LADA0C04720g	LAFA0E07404g	LAMI0D05644g	SAKL0H22836g	KLTH0E08536g
L.A1	A1LA01-105634g	1	-	114	114	LANO0F06656g	LAME0H04632g	ZYRO0G10890g	LAWA0D05292g	LACI0F09362g	LAFE0D02498g	LADA0C04742g	LAFA0E07426g	LAMI0D05666g	SAKL0H22814g	KLTH0E08514g
L.A1	A1LA01-105612g	1	+	115	115	LANO0F06678g	LAME0H04654g	ZYRO0G10868g	LAWA0D05281g	LACI0F09340g	LAFE0D02520g	LADA0C04764g	LAFA0E07448g	LAMI0D05688g	SAKL0H22792g	KLTH0E08492g
L.A1	A1LA01-105590g	1	-	116	116	LANO0F06700g	LAME0H04676g	ZYRO0G10846g	LAWA0D05270g	LACI0F09318g	LAFE0D02542g	LADA0C04786g	LAFA0E07470g	LAMI0D05710g	SAKL0H22770g	KLTH0E08470g
L.A1	A1LA01-105568g	1	+	117	117	LANO0F06722g	LAME0H04698g	ZYRO0G10824g	LAWA0D05248g	LACI0F09296g	LAFE0D02564g	LADA0C04808g	LAFA0E07492g	LAMI0D05732g	SAKL0H22748g	KLTH0E08448g
L.A1	A1LA01-105546g	1	-	118	118	LANO0F06744g	LAME0H04720g	ZYRO0G10802g	LAWA0D05226g	LACI0F09274g	LAFE0D02586g	LADA0C04830g	LAFA0E07514g	LAMI0D05754g	SAKL0H22726g	KLTH0E08437g
L.A1	A1LA01-105524g	1	-	119	119	LANO0F06766g	LAME0H04742g	ZYRO0G10780g	LAWA0D05204g	LACI0F09252g	LAFE0D02608g	LADA0C04852g	LAFA0E07536g	LAMI0D05776g	SAKL0H22704g	KLTH0E08426g
L.A1	A1LA01-105502g	1	+	120	120	LANO0F06788g	LAME0H04764g	ZYRO0G10714g	LAWA0D05182g	LACI0F09230g	LAFE0D02630g	LADA0C04874g	LAFA0E07558g	LAMI0D05798g	SAKL0H22660g	KLTH0E08382g
L.A1	A1LA01-105480g	1	+	121	121	LANO0F06810g	LAME0H04786g	ZYRO0G10670g	LAWA0D05160g	LACI0F09208g	LAFE0D02652g	LADA0C04896g	LAFA0E07580g	LAMI0D05820g	SAKL0H22638g	KLTH0E08360g
L.A1	A1LA01-105458g	1	-	122	122	LANO0F06832g	LAME0H04808g	ZYRO0G10582g	LAWA0D05138g	LACI0F09186g	LAFE0D02674g	LADA0C04918g	LAFA0E07602g	LAMI0D05842g	SAKL0H22594g	KLTH0E08338g
L.A1	A1LA01-105436g	1	-	123	123	LANO0F06876g	LAME0H04852g	ZYRO0G10626g	LAWA0D05094g	LACI0F09142g	LAFE0D02718g		LAFA0E07646g	LAMI0D05886g	SAKL0H22572g	KLTH0E08294g
L.A1	A1LA01-105414g	1	+	124	124	LANO0F06942g	LAME0H04874g	ZYRO0G10648g	LAWA0D05072g	LACI0F09120g	LAFE0D02740g	LADA0C04962g	LAFA0E07668g	LAMI0D05908g	SAKL0H22550g	KLTH0E08272g
L.A1	A1LA01-105392g	1	+	125	125	LANO0F06964g	LAME0H04896g	ZYRO0G10538g	LAWA0D05006g	LACI0F09076g	LAFE0D02784g	LADA0C04984g	LAFA0E07690g	LAMI0D05930g	SAKL0H22462g	KLTH0E08228g
L.A1	A1LA01-105370g	1	-	126	126	LANO0F06986g	LAME0H04918g	ZYRO0G10516g	LAWA0D04984g	LACI0F09054g	LAFE0D02806g	LADA0C05006g	LAFA0E07712g	LAMI0D05952g	SAKL0H22440g	KLTH0E08206g
L.A1	A1LA01-105348g	1	+	127	127	LANO0F07008g	LAME0H04940g	ZYRO0G10494g	LAWA0D04962g	LACI0F09032g	LAFE0D02828g	LADA0C05028g	LAFA0E07734g	LAMI0D05974g	SAKL0H22418g	KLTH0E08184g
L.A1	A1LA01-105326g	1	+	128	128	LANO0F07030g	LAME0H04962g	ZYRO0G10472g	LAWA0D04940g	LACI0F09010g	LAFE0D02850g	LADA0C05050g	LAFA0E07756g	LAMI0D05996g	SAKL0H22396g	KLTH0E08162g
L.A1	A1LA01-105304g	1	-	129	129	LANO0F07052g	LAME0H04984g	ZYRO0G10450g	LAWA0D04918g	LACI0F08988g	LAFE0D02872g	LADA0C05072g	LAFA0E07778g	LAMI0D06018g	SAKL0H22374g	KLTH0E08140g
L.A1	A1LA01-105282g	1	-	130	130	LANO0F07074g	LAME0H05006g	ZYRO0G10428g		LACI0F08966g	LAFE0D02894g	LADA0C05094g	LAFA0E07800g	LAMI0D06040g	SAKL0H22352g	KLTH0E08118g
L.A1	A1LA01-105260g	1	+	131	131	LANO0F07096g	LAME0H05028g	ZYRO0G10406g	LAWA0D04874g	LACI0F08944g	LAFE0D02916g	LADA0C05050g	LAFA0E07756g		SAKL0H22330g	KLTH0E08096g
L.A1	A1LA01-105238g	1	+	132	132	LANO0F07118g	LAME0H05050g	ZYRO0G10384g	LAWA0D04852g	LACI0F08922g	LAFE0D02938g	LADA0C05116g	LAFA0E07822g	LAMI0D06062g	SAKL0H22308g	KLTH0E08074g
L.A1	A1LA01-105216g	1	-	133	133	LANO0F07140g	LAME0H05072g	ZYRO0G10362g	LAWA0D04830g	LACI0F08900g	LAFE0D02960g	LADA0C05138g	LAFA0E07844g	LAMI0D06084g	SAKL0H22286g	KLTH0E08052g
L.A1	A1LA01-105194g	1	+	134	134	LANO0F07184g	LAME0H05094g	ZYRO0G10340g	LAWA0D04808g	LACI0F08878g	LAFE0D02982g	LADA0C05160g	LAFA0E07866g	LAMI0D06106g	SAKL0H22264g	KLTH0E08030g
L.A1	A1LA01-105172g	1	-	135	135	LANO0F07206g	LAME0F01706g	ZYRO0G10318g	LAWA0D04742g	LACI0F08834g	LAFE0D03004g	LADA0G04940g	LAFA0D10484g	LAMI0D06128g	SAKL0H22088g	KLTH0E07964g
L.A1	A1LA01-105150g	1	+	136	136	LANO0F07228g	LAME0F01662g	ZYRO0G10296g	LAWA0D04720g	LACI0F08812g	LAFE0D03026g	LADA0G04918g	LAFA0D10506g	LAMI0D06150g	SAKL0H22066g	KLTH0E07942g
L.A1	A1LA01-105106g	1	+	137	137	LANO0F07294g	LAME0F01618g	ZYRO0G10274g	LAWA0D04676g	LACI0F08746g	LAFE0D03070g	LADA0G04874g	LAFA0D10550g	LAMI0D06194g	SAKL0H22022g	KLTH0E07876g
L.A1	A1LA01-105084g	1	+	138	138	LANO0F07338g	LAME0F01574g	ZYRO0G10208g	LAWA0D04632g	LACI0F08702g	LAFE0D03114g	LADA0G04830g	LAFA0D10594g	LAMI0D06238g	SAKL0H22000g	KLTH0E07832g
L.A1	A1LA01-105062g	1	+	139	139	LANO0F07360g	LAME0F01552g	ZYRO0G10186g	LAWA0D04610g	LACI0F08680g	LAFE0D03136g	LADA0G04808g	LAFA0D10616g	LAMI0D06260g	SAKL0H21978g	KLTH0E07810g
L.A1	A1LA01-105040g	1	-	140	140	LANO0F07382g	LAME0F01530g	ZYRO0G10164g	LAWA0D04588g	LACI0F08658g	LAFE0D03158g	LADA0G04786g	LAFA0D10638g	LAMI0D06282g	SAKL0H21956g	KLTH0E07788g
L.A1	A1LA01-105018g	1	+	141	141	LANO0F07404g	LAME0F01508g	ZYRO0G10120g	LAWA0D04566g	LACI0F08636g	LAFE0D03180g	LADA0G04764g	LAFA0D10660g	LAMI0D06304g	SAKL0H21934g	KLTH0E07766g
L.A1	A1LA01-104996g	1	+	142	142	LANO0F07426g	LAME0F01486g	ZYRO0G10098g	LAWA0D04544g	LACI0F08614g	LAFE0D03202g	LADA0G04742g	LAFA0D10682g	LAMI0D06326g	SAKL0H21912g	KLTH0E07744g
L.A1	A1LA01-104974g	1	-	143	143	LANO0F07448g	LAME0F01464g	ZYRO0G10076g	LAWA0D04522g	LACI0F08592g	LAFE0D03224g	LADA0G04720g	LAFA0D10704g	LAMI0D06348g	SAKL0H21868g	KLTH0E07722g
L.A1	A1LA01-104952g	1	-	144	144	LANO0F07470g	LAME0F01442g	ZYRO0G10054g	LAWA0D04500g	LACI0F08570g	LAFE0D03246g	LADA0G04698g	LAFA0D10726g	LAMI0D06370g	SAKL0H21846g	KLTH0E07700g
L.A1	A1LA01-104908g	1	-	145	145	LANO0F07514g	LAME0F01398g	ZYRO0G10032g	LAWA0D04456g	LACI0F08526g	LAFE0D03290g	LADA0G04654g	LAFA0D10748g	LAMI0D06392g	SAKL0H21802g	KLTH0E07656g
L.A1	A1LA01-104886g	1	-	146	146	LANO0F07536g	LAME0F01376g	ZYRO0G10010g	LAWA0D04434g		LAFE0D03312g	LADA0G04632g	LAFA0D10770g	LAMI0D06414g	SAKL0H21758g	KLTH0E07634g
L.A1	A1LA01-104864g	1	+	147	147	LANO0F07558g	LAME0F01354g	ZYRO0G09988g	LAWA0D04412g	LACI0F08482g	LAFE0D03334g	LADA0G04610g	LAFA0D10792g	LAMI0D06436g	SAKL0H21714g	KLTH0E07612g
L.A1	A1LA01-104842g	1	-	148	148	LANO0F07580g	LAME0F01332g	ZYRO0G09966g	LAWA0D04390g	LACI0F08460g	LAFE0D03356g	LADA0G04588g	LAFA0D10814g	LAMI0D06458g	SAKL0H21692g	KLTH0E07590g
L.A1	A1LA01-104820g	1	+	149	149	LANO0F07602g	LAME0F01310g	ZYRO0G09944g	LAWA0D04368g	LACI0F08438g	LAFE0D03378g	LADA0G04566g	LAFA0D10836g	LAMI0D06480g	SAKL0H21670g	KLTH0E07568g
L.A1	A1LA01-104798g	1	-	150	150	LANO0F07624g	LAME0F01288g	ZYRO0G09922g	LAWA0D04346g	LACI0F08416g	LAFE0D03400g	LADA0G04544g	LAFA0D10858g	LAMI0D06502g	SAKL0H21648g	KLTH0E07546g
L.A1	A1LA01-104776g	1	+	151	151	LANO0F07646g	LAME0F01266g	ZYRO0G09900g	LAWA0D04302g	LACI0F08394g	LAFE0D03422g	LADA0G04522g	LAFA0D10880g	LAMI0D06546g	SAKL0H21626g	KLTH0E07524g
L.A1	A1LA01-104754g	1	-	152	152	LANO0F07668g	LAME0F01244g	ZYRO0G09878g	LAWA0D04280g	LACI0F08372g	LAFE0D03444g	LADA0G04500g	LAFA0D10902g	LAMI0D06568g	SAKL0H21604g	KLTH0E07502g
L.A1	A1LA01-104732g	1	+	153	153	LANO0F07690g	LAME0F01222g	ZYRO0G09856g		LACI0F08350g	LAFE0D03466g	LADA0G04478g	LAFA0D10924g	LAMI0D06590g	SAKL0H21582g	KLTH0E07480g
L.A1	A1LA01-104710g	1	-	154	154	LANO0F07712g	LAME0F01200g	ZYRO0G09834g		LACI0F08328g	LAFE0D03488g	LADA0G04456g	LAFA0D10946g	LAMI0D06612g	SAKL0H21560g	KLTH0E07458g
L.A1	A1LA01-104688g	1	-	155	155	LANO0F07734g	LAME0F01178g	ZYRO0G09812g		LACI0F08284g	LAFE0D03510g	LADA0G04434g	LAFA0D10968g	LAMI0D06634g	SAKL0H21494g	KLTH0E07414g
L.A1	A1LA01-104666g	1	+	156	156	LANO0F07756g	LAME0F01156g	ZYRO0G09790g	LAWA0D04192g	LACI0F08262g	LAFE0D03532g	LADA0G04412g		LAMI0D06656g	SAKL0H21472g	KLTH0E07392g
L.A1	A1LA01-104644g	1	+	157	157	LANO0F07778g	LAME0F01134g	ZYRO0G09768g	LAWA0D04170g	LACI0F08240g	LAFE0D03554g	LADA0G04390g	LAFA0D10990g	LAMI0D06678g	SAKL0H21450g	KLTH0E07370g
L.A1	A1LA01-104622g	1	+	158	158	LANO0F07800g	LAME0F01112g	ZYRO0G09746g	LAWA0D04148g	LACI0F08218g	LAFE0D03576g	LADA0G04368g	LAFA0D11012g	LAMI0D06700g	SAKL0H21428g	KLTH0E07348g
L.A1	A1LA01-104600g	1	+	159	159	LANO0F07822g	LAME0F01090g	ZYRO0G09724g	LAWA0D04126g	LACI0F08196g	LAFE0D03598g	LADA0G04346g	LAFA0D11034g	LAMI0D06722g	SAKL0H21406g	KLTH0E07326g
L.A1	A1LA01-104578g	1	+	160	160	LANO0F07844g	LAME0F01068g	ZYRO0G09702g	LAWA0D04104g	LACI0F08174g	LAFE0D03620g	LADA0G04324g	LAFA0D11056g	LAMI0D06744g	SAKL0H21384g	KLTH0E07304g
L.A1	A1LA01-104556g	1	+	161	161	LANO0F07866g	LAME0F01046g	ZYRO0G09680g		LACI0F08108g	LAFE0D03686g	LADA0G04302g	LAFA0D11078g	LAMI0D06788g	SAKL0H21318g	KLTH0E07282g
L.A1	A1LA01-104534g	1	-	162	162	LANO0F07888g	LAME0F01024g	ZYRO0G09658g	LAWA0D04060g	LACI0F08086g	LAFE0D03708g	LADA0G04280g	LAFA0D11100g		SAKL0H21296g	KLTH0E07260g
L.A1	A1LA01-104512g	1	-	163	163	LANO0F07910g	LAME0F01002g	ZYRO0G09614g	LAWA0D04016g	LACI0F08042g	LAFE0D03752g	LADA0G04258g	LAFA0D11122g	LAMI0D06810g	SAKL0H21252g	KLTH0E07216g
L.A1	A1LA01-104490g	1	+	164	164	LANO0F07932g	LAME0F00980g	ZYRO0G09592g	LAWA0D03906g	LACI0F08020g	LAFE0D03774g	LADA0G04236g	LAFA0D11144g	LAMI0D06832g	SAKL0H21230g	KLTH0E07194g
L.A1	A1LA01-104468g	1	-	165	165	LANO0F07954g	LAME0F00958g	ZYRO0G09570g	LAWA0D03950g	LACI0F07998g	LAFE0D03796g	LADA0G04214g	LAFA0D11166g	LAMI0D06854g	SAKL0H21208g	KLTH0E07172g
L.A1	A1LA01-104446g	1	-	166	166	LANO0F05336g	LAME0H03356g	ZYRO0G09548g		LACI0H16028g	LAFE0H12750g	LADA0H11738g	LAFA0E16842g	LAMI0H13960g	SAKL0H21186g	KLTH0H09350g
L.A1	A1LA01-104424g	1	+	167	167	LANO0F05314g	LAME0H03334g	ZYRO0G09526g	LAWA0H07844g	LACI0H16006g	LAFE0H12728g	LADA0H11716g	LAFA0E16864g	LAMI0H13938g	SAKL0H21164g	KLTH0H09328g
L.A1	A1LA01-104380g	1	+	168	168	LANO0F05248g	LAME0H03290g	ZYRO0G09504g		LACI0H15984g	LAFE0H12706g	LADA0H11672g	LAFA0E16908g	LAMI0H13894g	SAKL0H21120g	KLTH0H09284g
L.A1	A1LA01-104358g	1	-	169	169	LANO0F05226g	LAME0H03268g	ZYRO0G09482g	LAWA0H07778g	LACI0H15962g	LAFE0H12684g	LADA0H11650g	LAFA0E16930g	LAMI0H13872g	SAKL0H21098g	KLTH0H09262g
L.A1	A1LA01-104336g	1	-	170	170	LANO0F05204g	LAME0H03246g	ZYRO0G09460g	LAWA0H07756g	LACI0H15940g	LAFE0H12662g	LADA0H11628g	LAFA0E16952g	LAMI0H13850g	SAKL0H21076g	KLTH0H09240g
L.A1	A1LA01-104292g	1	+	171	171	LANO0F05116g	LAME0H03158g	ZYRO0G09416g	LAWA0H07668g	LACI0H15896g	LAFE0H12618g	LADA0H11562g	LAFA0E17018g	LAMI0H13806g	SAKL0H20966g	KLTH0H09174g
L.A1	A1LA01-104270g	1	-	172	172	LANO0F05094g	LAME0H03136g	ZYRO0G09394g	LAWA0H07646g	LACI0H15874g	LAFE0H12596g	LADA0H11540g	LAFA0E17040g	LAMI0H13784g	SAKL0H20944g	KLTH0H09152g
L.A1	A1LA01-104248g	1	-	173	173	LANO0F05072g	LAME0H03114g	ZYRO0G09372g	LAWA0H07624g	LACI0H15852g	LAFE0H12574g	LADA0H11518g	LAFA0E17062g	LAMI0H13762g	SAKL0H20922g	KLTH0H09130g
L.A1	A1LA01-104226g	1	-	174	174	LANO0F05050g	LAME0H03092g	ZYRO0G09350g	LAWA0H07580g	LACI0H15830g	LAFE0H12552g	LADA0H11496g	LAFA0E17084g	LAMI0H13740g	SAKL0H20900g	KLTH0H09108g
L.A1	A1LA01-104204g	1	+	175	175	LANO0F05028g	LAME0H03070g	ZYRO0G09306g	LAWA0H07558g	LACI0H15808g	LAFE0H12530g	LADA0H11474g	LAFA0E17106g	LAMI0H13718g	SAKL0H20878g	KLTH0H09086g
L.A1	A1LA01-104182g	1	+	176	176	LANO0F05006g	LAME0H03048g	ZYRO0G09284g	LAWA0H07536g	LACI0H15786g	LAFE0H12508g	LADA0H11452g	LAFA0E17128g	LAMI0H13696g	SAKL0H20856g	KLTH0H09064g
L.A1	A1LA01-104160g	1	-	177	177	LANO0F04984g	LAME0H03026g	ZYRO0G07018g	LAWA0H07514g	LACI0H15764g	LAFE0H12486g	LADA0H11430g	LAFA0E17150g	LAMI0H13674g	SAKL0H20746g	KLTH0H09042g
L.A1	A1LA01-104138g	1	+	178	178	LANO0F04962g	LAME0H03004g	ZYRO0G07040g	LAWA0H07492g	LACI0H15742g	LAFE0H12464g	LADA0H11408g	LAFA0E17172g	LAMI0H13652g	SAKL0H20724g	KLTH0H09020g
L.A1	A1LA01-104116g	1	+	179	179	LANO0F04940g	LAME0H02982g	ZYRO0A11968g	LAWA0H07470g	LACI0H15720g	LAFE0H12442g	LADA0H11386g	LAFA0E17194g	LAMI0H13630g	SAKL0H20680g	KLTH0H08998g
L.A1	A1LA01-104094g	1	+	180	180	LANO0F04918g	LAME0H02960g	ZYRO0A11990g	LAWA0H07448g	LACI0H15698g	LAFE0H12420g	LADA0H11364g	LAFA0E17216g	LAMI0H13608g	SAKL0H20658g	KLTH0H08976g
L.A1	A1LA01-104072g	1	+	181	181	LANO0F04896g	LAME0H02938g	ZYRO0A12012g	LAWA0H07426g	LACI0H15676g	LAFE0H12398g	LADA0H11342g	LAFA0E17238g	LAMI0H13586g	SAKL0H20592g	KLTH0H08954g
L.A1	A1LA01-104050g	1	-	182	182	LANO0F04874g	LAME0H02916g	ZYRO0A12034g	LAWA0H07404g	LACI0H15654g	LAFE0H12376g	LADA0H11320g	LAFA0E17260g	LAMI0H13564g	SAKL0H20570g	KLTH0H08932g
L.A1	A1LA01-104028g	1	+	183	183	LANO0F04852g	LAME0H02894g	ZYRO0A12056g	LAWA0H07382g	LACI0H15632g	LAFE0H12354g	LADA0H11298g	LAFA0E17282g	LAMI0H13520g	SAKL0H20548g	KLTH0H08910g
L.A1	A1LA01-104006g	1	+	184	184	LANO0F04830g	LAME0H02872g	ZYRO0E02772g	LAWA0H07360g	LACI0H15610g	LAFE0H12332g	LADA0H11276g	LAFA0E17304g	LAMI0H13542g	SAKL0H20526g	KLTH0H08888g
L.A1	A1LA01-103984g	1	-	185	185	LANO0F04808g	LAME0H02850g	ZYRO0E02750g	LAWA0H07338g	LACI0H15588g	LAFE0H12310g	LADA0H11254g	LAFA0E17326g	LAMI0H13498g	SAKL0H20504g	KLTH0H08866g
L.A1	A1LA01-103962g	1	-	186	186	LANO0F04786g	LAME0H02828g	ZYRO0E02728g	LAWA0H07316g	LACI0H15566g	LAFE0H12288g	LADA0H11232g	LAFA0E17348g	LAMI0H13476g	SAKL0H20482g	KLTH0H08844g
L.A1	A1LA01-103940g	1	-	187	187			ZYRO0E02684g							SAKL0H20416g
L.A1	A1LA01-103918g	1	-	188	188	LANO0F04742g	LAME0C05028g	ZYRO0E02662g	LAWA0H07272g	LACI0H15522g	LAFE0H12222g	LADA0F08768g	LAFA0E17392g	LAMI0H13432g	SAKL0H20372g	KLTH0H08778g
L.A1	A1LA01-103874g	1	+	189	189	LANO0F04698g	LAME0C05072g	ZYRO0E02618g	LAWA0H07228g	LACI0H15478g	LAFE0H12178g	LADA0F08812g	LAFA0E17436g	LAMI0H13388g	SAKL0H20328g	KLTH0H08734g
L.A1	A1LA01-103852g	1	+	190	190	LANO0F04676g	LAME0C05094g	ZYRO0E02596g	LAWA0H07206g	LACI0H15456g	LAFE0H12156g	LADA0F08834g	LAFA0E17458g	LAMI0H13366g	SAKL0H20306g	KLTH0H08712g
L.A1	A1LA01-103830g	1	+	191	191	LANO0F04654g	LAME0C05116g	ZYRO0E02574g	LAWA0H07184g	LACI0H15434g		LADA0F08856g	LAFA0E17480g	LAMI0H13344g	SAKL0H20284g	KLTH0H08690g
L.A1	A1LA01-103786g	1	+	192	192	LANO0F04632g	LAME0C05138g	ZYRO0E02552g	LAWA0H07162g	LACI0H15390g	LAFE0H12090g	LADA0F08878g	LAFA0E17502g	LAMI0H13322g	SAKL0H20240g	KLTH0H08668g
L.A1	A1LA01-103764g	1	-	193	193	LANO0F04610g	LAME0C05160g	ZYRO0E02530g		LACI0H15368g	LAFE0H12068g	LADA0F08900g	LAFA0E17524g	LAMI0H13300g	SAKL0H20218g	KLTH0H08646g
L.A1	A1LA01-103742g	1	+	194	194	LANO0F04588g	LAME0C05182g	ZYRO0B00704g	LAWA0H07118g	LACI0H15346g	LAFE0H12046g	LADA0F08922g	LAFA0E17546g	LAMI0H13278g	SAKL0H20196g	KLTH0H08624g
L.A1	A1LA01-103698g	1	-	195	195	LANO0F04544g	LAME0C05226g	ZYRO0B00748g		LACI0H15280g	LAFE0H11980g	LADA0F08966g	LAFA0E17590g	LAMI0H13212g	SAKL0H20108g
L.A1	A1LA01-103676g	1	-	196	196	LANO0F04522g	LAME0C05248g	ZYRO0B00770g	LAWA0H07074g	LACI0H15258g	LAFE0H11958g	LADA0F08988g	LAFA0E17612g	LAMI0H13190g	SAKL0H20086g	KLTH0H08514g
L.A1	A1LA01-103654g	1	+	197	197	LANO0F04500g	LAME0C05270g	ZYRO0B00792g	LAWA0H07052g	LACI0H15236g	LAFE0H11936g	LADA0F09010g	LAFA0E17634g	LAMI0H13168g	SAKL0H20064g	KLTH0H08492g
L.A1	A1LA01-103632g	1	+	198	198	LANO0F04478g	LAME0C05292g	ZYRO0B00814g	LAWA0H07030g	LACI0H15214g	LAFE0H11914g	LADA0F09032g	LAFA0E17656g	LAMI0H13146g	SAKL0H20042g	KLTH0H08470g
L.A1	A1LA01-103610g	1	+	199	199	LANO0F04456g	LAME0C05314g	ZYRO0B00836g	LAWA0H07008g	LACI0H15192g	LAFE0H11892g	LADA0F09054g	LAFA0E17678g	LAMI0H13124g	SAKL0H20020g	KLTH0H08448g
L.A1	A1LA01-103588g	1	-	200	200	LANO0F04434g	LAME0C05336g	ZYRO0C13068g		LACI0H15170g	LAFE0H11848g	LADA0F09076g	LAFA0E17700g	LAMI0H13102g	SAKL0H19866g	KLTH0H08382g
L.A1	A1LA01-103566g	1	-	201	201	LANO0F04412g	LAME0C05358g	ZYRO0C13134g		LACI0H15148g	LAFE0H11826g	LADA0F09098g	LAFA0E17722g	LAMI0H13080g	SAKL0H19690g	KLTH0H08338g
L.A1	A1LA01-103544g	1	-	202	202	LANO0F04390g	LAME0C05380g	ZYRO0C13156g		LACI0H15126g	LAFE0H11804g	LADA0F09120g	LAFA0C06172g	LAMI0H13058g	SAKL0H19668g	KLTH0H08316g
L.A1	A1LA01-103522g	1	+	203	203	LANO0F04368g	LAME0C05402g	ZYRO0C13178g		LACI0H15104g	LAFE0H11782g	LADA0F09142g	LAFA0C06150g	LAMI0H13036g	SAKL0H19646g	KLTH0H08294g
L.A1	A1LA01-103500g	1	+	204	204	LANO0F04346g	LAME0C05424g	ZYRO0C13200g	LAWA0H06964g	LACI0H15082g	LAFE0H11760g	LADA0F09164g	LAFA0C06128g	LAMI0H13014g	SAKL0H19624g	KLTH0H08272g
L.A1	A1LA01-103478g	1	-	205	205	LANO0F04324g	LAME0C05446g	ZYRO0C13222g	LAWA0H06942g	LACI0H15060g	LAFE0H11738g	LADA0F09186g	LAFA0C06106g	LAMI0H12992g	SAKL0H19602g	KLTH0H08250g
L.A1	A1LA01-103456g	1	-	206	206	LANO0F04302g	LAME0C05468g	ZYRO0C13244g	LAWA0H06920g	LACI0H15038g	LAFE0H11716g	LADA0F09208g	LAFA0C06084g	LAMI0H12970g	SAKL0H19580g	KLTH0H08228g
L.A1	A1LA01-103434g	1	+	207	207	LANO0F04280g	LAME0C05490g	ZYRO0G08888g	LAWA0H06898g	LACI0H15016g	LAFE0H11694g	LADA0F09230g	LAFA0C06062g	LAMI0H12948g	SAKL0H19558g	KLTH0H08206g
L.A1	A1LA01-103412g	1	+	208	208	LANO0F04258g	LAME0C05512g	ZYRO0G08910g	LAWA0H06876g	LACI0H14994g	LAFE0H11672g	LADA0F09252g	LAFA0C06040g	LAMI0H12926g	SAKL0H19536g	KLTH0H08184g
L.A1	A1LA01-103390g	1	+	209	209		LAME0C05534g	ZYRO0G08932g		LACI0H14972g	LAFE0H11650g	LADA0F09274g	LAFA0C06018g	LAMI0H12904g	SAKL0H19514g	KLTH0H08162g
L.A1	A1LA01-103368g	1	-	210	210	LANO0F04236g	LAME0C05556g	ZYRO0G08954g	LAWA0H06854g	LACI0H14950g	LAFE0H11628g	LADA0F09296g	LAFA0C05996g	LAMI0H12882g	SAKL0H19492g	KLTH0H08140g
L.A1	A1LA01-103346g	1	+	211	211	LANO0F04214g	LAME0C05578g	ZYRO0G08976g	LAWA0H06832g	LACI0H14928g	LAFE0H11606g	LADA0F09318g	LAFA0C05974g	LAMI0H12860g	SAKL0H19470g	KLTH0H08118g
L.A1	A1LA01-103324g	1	-	212	212	LANO0F04192g	LAME0C05600g	ZYRO0G08998g		LACI0H14906g	LAFE0H11584g	LADA0F09340g	LAFA0C05952g	LAMI0H12838g	SAKL0H19448g	KLTH0H08096g
L.A1	A1LA01-103302g	1	-	213	213	LANO0F04170g	LAME0C05622g	ZYRO0G09020g	LAWA0H06788g	LACI0H14884g	LAFE0H11562g	LADA0F09362g	LAFA0C05930g	LAMI0H12816g	SAKL0H19426g	KLTH0H08074g
L.A1	A1LA01-103280g	1	+	214	214	LANO0F04148g	LAME0C05644g	ZYRO0G09064g	LAWA0H06766g	LACI0H14862g	LAFE0H11540g	LADA0F09384g	LAFA0C05908g	LAMI0H12794g	SAKL0H19382g	KLTH0H08030g
L.A1	A1LA01-103258g	1	-	215	215	LANO0F04126g	LAME0C05666g	ZYRO0G09086g	LAWA0H06744g	LACI0H14840g	LAFE0H11518g	LADA0F09406g	LAFA0C05886g	LAMI0H12772g	SAKL0H19360g	KLTH0H08008g
L.A1	A1LA01-103236g	1	-	216	216	LANO0F04104g	LAME0C05688g	ZYRO0G09108g	LAWA0H06722g	LACI0H14818g	LAFE0H11496g	LADA0F09428g	LAFA0C05864g	LAMI0H12750g	SAKL0H19338g	KLTH0H07986g
L.A1	A1LA01-103192g	1	+	217	217	LANO0F04060g	LAME0C05732g	ZYRO0G09130g	LAWA0H06678g	LACI0H14796g	LAFE0H11452g	LADA0A05226g	LAFA0C05820g	LAMI0H12706g	SAKL0H19294g	KLTH0H07942g
L.A1	A1LA01-103170g	1	+	218	218	LANO0F04038g	LAME0C05754g	ZYRO0G09152g	LAWA0H06656g	LACI0H14774g	LAFE0H11430g	LADA0A05204g	LAFA0C05798g	LAMI0H12684g	SAKL0H19272g	KLTH0H07920g
L.A1	A1LA01-103148g	1	+	219	219	LANO0F04016g	LAME0C05776g	ZYRO0G09174g	LAWA0H06634g	LACI0H14752g	LAFE0H11408g	LADA0A05182g	LAFA0C05776g	LAMI0H12662g	SAKL0H19250g	KLTH0H07898g
L.A1	A1LA01-103126g	1	+	220	220	LANO0F03994g	LAME0C05798g	ZYRO0G09196g	LAWA0H06612g	LACI0H14730g	LAFE0H11386g	LADA0A05160g	LAFA0C05754g	LAMI0H12640g	SAKL0H19228g	KLTH0H07876g
L.A1	A1LA01-103104g	1	+	221	221	LANO0F03972g	LAME0C05820g	ZYRO0G06974g	LAWA0H06590g	LACI0H14708g	LAFE0H11364g	LADA0A05138g	LAFA0C05732g	LAMI0H12618g	SAKL0H19162g	KLTH0H07854g
L.A1	A1LA01-103082g	1	-	222	222	LANO0F03950g	LAME0C05842g	ZYRO0G06952g	LAWA0H06568g	LACI0H14686g	LAFE0H11342g	LADA0A05116g	LAFA0C05710g	LAMI0H12596g	SAKL0H19140g	KLTH0H07832g
L.A1	A1LA01-103060g	1	+	223	223	LANO0F03928g	LAME0C05864g	ZYRO0G06930g	LAWA0H06546g	LACI0H14664g	LAFE0H11320g	LADA0A05094g	LAFA0C05688g	LAMI0H12574g	SAKL0H19118g	KLTH0H07810g
L.A1	A1LA01-103038g	1	+	224	224	LANO0F03906g	LAME0C05886g	ZYRO0G06908g	LAWA0H06524g	LACI0H14642g	LAFE0H11254g	LADA0A05072g	LAFA0C05666g	LAMI0H12552g	SAKL0H19096g	KLTH0H07788g
L.A1	A1LA01-103016g	1	-	225	225	LANO0F03884g	LAME0C05908g	ZYRO0G06886g	LAWA0H06502g	LACI0H14620g	LAFE0H11232g	LADA0A05050g	LAFA0C05644g	LAMI0H12530g	SAKL0H19074g	KLTH0H07766g
L.A1	A1LA01-102994g	1	+	226	226	LANO0F03862g		ZYRO0G06864g		LACI0H14598g	LAFE0H11210g	LADA0A05028g	LAFA0C05468g	LAMI0H12508g	SAKL0H19052g	KLTH0H07744g
L.A1	A1LA01-102972g	1	-	227	227	LANO0F03840g	LAME0C05930g	ZYRO0G06842g	LAWA0H06458g	LACI0H14576g	LAFE0H11188g	LADA0A05006g	LAFA0C05622g	LAMI0H12486g	SAKL0H19030g	KLTH0H07722g
L.A1	A1LA01-102950g	1	+	228	228	LANO0F03818g	LAME0C05952g	ZYRO0G06820g	LAWA0H06436g	LACI0H14554g	LAFE0H11166g	LADA0A04984g	LAFA0C05600g	LAMI0H12464g	SAKL0H19008g	KLTH0H07700g
L.A1	A1LA01-102928g	1	-	229	229	LANO0F03796g	LAME0C05974g	ZYRO0G06798g		LACI0H14532g	LAFE0H11144g	LADA0A04962g	LAFA0C05578g	LAMI0H12442g	SAKL0H18986g	KLTH0H07678g
L.A1	A1LA01-102906g	1	-	230	230	LANO0F03774g	LAME0C05996g	ZYRO0G06776g		LACI0H14510g	LAFE0H11122g	LADA0A04940g	LAFA0C05556g	LAMI0H12420g	SAKL0H18964g	KLTH0H07656g
L.A1	A1LA01-102884g	1	-	231	231	LANO0F03752g	LAME0C06018g	ZYRO0G06754g	LAWA0H06392g	LACI0H14488g	LAFE0H11100g	LADA0A04918g	LAFA0C05534g	LAMI0H12398g	SAKL0H18942g	KLTH0H07634g
L.A1	A1LA01-102862g	1	+	232	232	LANO0F03730g	LAME0C06040g	ZYRO0G14696g	LAWA0H06370g	LACI0H14466g	LAFE0H11078g	LADA0A04896g	LAFA0C05512g	LAMI0H12376g	SAKL0H18898g	KLTH0H07612g
L.A1	A1LA01-102840g	1	-	233	233		LAME0C06062g	ZYRO0G14718g	LAWA0H06348g	LACI0H14444g		LADA0A04874g	LAFA0C05490g	LAMI0H12354g	SAKL0H18876g	KLTH0H07590g
L.A1	A1LA01-102818g	1	+	234	234	LANO0F03686g	LAME0C06084g	ZYRO0G14740g	LAWA0H06326g	LACI0H14422g	LAFE0H11012g	LADA0A04852g	LAFA0C05468g	LAMI0H12332g	SAKL0H18854g	KLTH0H07568g
L.A1	A1LA01-102796g	1	+	235	235	LANO0F03664g	LAME0C06106g	ZYRO0G14762g	LAWA0H06304g	LACI0H14400g	LAFE0H10990g	LADA0A04830g	LAFA0C05446g	LAMI0H12310g	SAKL0H18832g	KLTH0H07546g
L.A1	A1LA01-102774g	1	-	236	236	LANO0F03642g	LAME0C06128g	ZYRO0G14784g	LAWA0H06282g	LACI0H14378g	LAFE0H10968g	LADA0A04808g	LAFA0C05424g	LAMI0H12288g	SAKL0H18810g	KLTH0H07524g
L.A1	A1LA01-102752g	1	+	237	237	LANO0F03620g	LAME0C06150g	ZYRO0G14806g	LAWA0H06260g	LACI0H14356g	LAFE0H10946g	LADA0A04786g	LAFA0C05402g	LAMI0H12266g	SAKL0H18788g	KLTH0H07502g
L.A1	A1LA01-102730g	1	-	238	238	LANO0F03598g	LAME0C06172g	ZYRO0G14828g	LAWA0H06238g	LACI0H14334g	LAFE0H10924g	LADA0A04764g	LAFA0C05380g	LAMI0H12244g	SAKL0H18766g	KLTH0H07480g
L.A1	A1LA01-102708g	1	+	239	239	LANO0F03576g	LAME0C06194g	ZYRO0G14850g	LAWA0H06216g	LACI0H14312g	LAFE0H10902g	LADA0A04742g	LAFA0C05358g	LAMI0H12222g	SAKL0H18744g	KLTH0H07458g
L.A1	A1LA01-102686g	1	+	240	240	LANO0F03554g	LAME0C06216g	ZYRO0G14872g	LAWA0H06194g	LACI0H14290g	LAFE0H10880g	LADA0A04720g	LAFA0C05336g	LAMI0H12200g	SAKL0H18722g	KLTH0H07436g
L.A1	A1LA01-102664g	1	+	241	241			ZYRO0G14894g		LACI0H14246g		LADA0A04698g	LAFA0C05314g	LAMI0H12178g	SAKL0H18700g	KLTH0H07414g
L.A1	A1LA01-102642g	1	-	242	242	LANO0F03510g	LAME0C06238g	ZYRO0B11044g		LACI0H14246g	LAFE0H10836g	LADA0A04676g	LAFA0C05292g	LAMI0H12156g	SAKL0H18656g	KLTH0H07370g
L.A1	A1LA01-102620g	1	-	243	243	LANO0F03488g	LAME0C06260g	ZYRO0B11066g	LAWA0H06128g	LACI0H14224g	LAFE0H10814g	LADA0A04654g	LAFA0C05270g	LAMI0H12134g	SAKL0H18634g	KLTH0H07348g
L.A1	A1LA01-102598g	1	-	244	244	LANO0F03466g	LAME0C06282g	ZYRO0B11088g		LACI0H14202g	LAFE0H10792g	LADA0A04632g	LAFA0C05248g	LAMI0H12112g	SAKL0H18612g
L.A1	A1LA01-102576g	1	-	245	245	LANO0F03444g	LAME0C06304g	ZYRO0B11110g	LAWA0H06106g	LACI0H14180g	LAFE0H10770g	LADA0A04610g	LAFA0C05226g	LAMI0H12090g	SAKL0H18590g	KLTH0H07326g
L.A1	A1LA01-102554g	1	+	246	246	LANO0F03422g	LAME0C06326g	ZYRO0B11132g		LACI0H14158g	LAFE0H10748g	LADA0A04588g	LAFA0C05204g	LAMI0H12068g	SAKL0H18568g	KLTH0H07304g
L.A1	A1LA01-102532g	1	-	247	247	LANO0F03400g	LAME0C06348g	ZYRO0B11154g	LAWA0H06062g	LACI0H14136g	LAFE0H10726g	LADA0A04566g	LAFA0C05182g	LAMI0H12046g	SAKL0H18546g	KLTH0H07282g
L.A1	A1LA01-102510g	1	-	248	248	LANO0F03378g	LAME0C06370g	ZYRO0B11176g	LAWA0H06040g	LACI0H14114g	LAFE0H10704g	LADA0A04544g	LAFA0C05160g	LAMI0H12024g	SAKL0H18524g	KLTH0H07260g
L.A1	A1LA01-102488g	1	+	249	249	LANO0F03356g	LAME0C06392g	ZYRO0B11198g	LAWA0H06018g	LACI0H14092g	LAFE0H10682g	LADA0A04522g	LAFA0C05138g	LAMI0H12002g	SAKL0H18502g	KLTH0H07238g
L.A1	A1LA01-102466g	1	+	250	250	LANO0F03312g	LAME0C06436g	ZYRO0B11220g	LAWA0H05996g	LACI0H14070g	LAFE0H10660g	LADA0A04214g	LAFA0C05094g	LAMI0H11980g	SAKL0H18480g	KLTH0H07216g
L.A1	A1LA01-102444g	1	-	251	251	LANO0F03290g	LAME0C06458g	ZYRO0B11242g	LAWA0H05974g	LACI0H14048g	LAFE0H10638g	LADA0A04236g	LAFA0C05072g	LAMI0H11958g	SAKL0H18458g	KLTH0H07205g
L.A1	A1LA01-102422g	1	+	252	252	LANO0F03268g	LAME0C06480g	ZYRO0B11264g	LAWA0H05952g	LACI0H14026g	LAFE0H10616g	LADA0A04258g	LAFA0C05050g	LAMI0H11936g	SAKL0H18436g	KLTH0H07194g
L.A1	A1LA01-102400g	1	-	253	253	LANO0C05358g	LAME0C06502g	ZYRO0B11286g	LAWA0H05930g	LACI0H14004g	LAFE0H10594g	LADA0A04280g	LAFA0C05028g	LAMI0H11914g	SAKL0H18414g	KLTH0H07172g
L.A1	A1LA01-102378g	1	-	254	254	LANO0F03224g	LAME0C06524g	ZYRO0B11308g	LAWA0H05908g	LACI0H13982g	LAFE0H10572g	LADA0A04302g	LAFA0C05006g	LAMI0H11892g	SAKL0H18392g	KLTH0H07150g
L.A1	A1LA01-102356g	1	+	255	255	LANO0F03202g	LAME0C06546g	ZYRO0B11330g	LAWA0H05886g	LACI0H13960g	LAFE0H10550g	LADA0A04324g	LAFA0C04984g	LAMI0H11870g	SAKL0H18370g	KLTH0H07128g
L.A1	A1LA01-102334g	1	+	256	256	LANO0C05270g	LAME0G09846g	ZYRO0B11352g	LAWA0A05842g	LACI0H13938g	LAFE0H10528g	LADA0F04434g	LAFA0E06744g	LAMI0H11848g	SAKL0H18348g	KLTH0G14784g
L.A1	A1LA01-102312g	1	-	257	257	LANO0C05292g	LAME0G09824g	ZYRO0B11374g	LAWA0A05864g	LACI0H13916g	LAFE0H10506g	LADA0F04412g	LAFA0E06722g	LAMI0H11826g	SAKL0H18326g	KLTH0G14762g
L.A1	A1LA01-102290g	1	-	258	258	LANO0C05314g	LAME0G09802g	ZYRO0B11418g	LAWA0A05908g	LACI0H13894g	LAFE0H10462g	LADA0F04390g	LAFA0E06700g	LAMI0H11804g	SAKL0H18282g	KLTH0G14740g
L.A1	A1LA01-102246g	1	-	259	259	LANO0C05358g	LAME0G09758g	ZYRO0B11440g	LAWA0A05952g	LACI0H13850g	LAFE0H10418g	LADA0F04346g	LAFA0E06656g	LAMI0H11760g	SAKL0H18238g	KLTH0G14696g
L.A1	A1LA01-102224g	1	-	260	260	LANO0C05380g	LAME0G09736g	ZYRO0B11462g	LAWA0A05974g	LACI0H13828g	LAFE0H10396g	LADA0F04324g	LAFA0E06634g	LAMI0H11738g	SAKL0H18216g	KLTH0G14674g
L.A1	A1LA01-102202g	1	-	261	261	LANO0C05402g	LAME0G09714g	ZYRO0B11484g	LAWA0A05996g	LACI0H13806g	LAFE0H10374g	LADA0F04302g	LAFA0E06612g	LAMI0H11716g	SAKL0H18194g	KLTH0G14652g
L.A1	A1LA01-102180g	1	-	262	262	LANO0C05424g	LAME0G09692g	ZYRO0B11506g	LAWA0A06018g	LACI0H13784g	LAFE0H10352g	LADA0F04280g	LAFA0E06590g	LAMI0H11694g	SAKL0H18172g	KLTH0G14630g
L.A1	A1LA01-102136g	1	-	263	263	LANO0C05468g	LAME0G09648g	ZYRO0B11550g	LAWA0A06062g	LACI0H13740g	LAFE0H10308g	LADA0F04236g	LAFA0E06546g	LAMI0H14730g	SAKL0H18084g	KLTH0G14586g
L.A1	A1LA01-102114g	1	-	264	264	LANO0C05490g	LAME0G09626g	ZYRO0B11572g		LACI0H13718g	LAFE0H10286g	LADA0F04214g	LAFA0E06524g	LAMI0H14752g	SAKL0H18062g	KLTH0G14564g
L.A1	A1LA01-102070g	1	-	265	265	LANO0C05534g		ZYRO0B11594g				LADA0F04170g			SAKL0H18018g	KLTH0G14542g
L.A1	A1LA01-102048g	1	-	266	266	LANO0C05556g	LAME0G09582g	ZYRO0B11616g	LAWA0A06106g	LACI0H13674g	LAFE0H10242g	LADA0F04148g	LAFA0E06480g	LAMI0H14796g	SAKL0H17996g	KLTH0G14520g
L.A1	A1LA01-102026g	1	+	267	267		LAME0G09560g	ZYRO0B11638g	LAWA0A06128g	LACI0H13652g	LAFE0H10220g	LADA0F04126g	LAFA0E06458g	LAMI0H14818g	SAKL0H17974g	KLTH0G14498g
L.A1	A1LA01-102004g	1	+	268	268	LANO0C05732g	LAME0G09406g	ZYRO0B11660g	LAWA0A06282g	LACI0H13630g	LAFE0H10198g	LADA0F03972g	LAFA0E06282g	LAMI0H14840g	SAKL0H17952g	KLTH0G14344g
L.A1	A1LA01-101982g	1	+	269	269	LANO0C05710g	LAME0G09428g	ZYRO0B11682g	LAWA0A06260g	LACI0H13608g	LAFE0H10176g	LADA0F03994g	LAFA0E06304g	LAMI0H14862g	SAKL0H17930g	KLTH0G14366g
L.A1	A1LA01-101960g	1	+	270	270	LANO0C05688g	LAME0G09450g	ZYRO0B11704g		LACI0H13586g	LAFE0H10154g	LADA0F04016g	LAFA0E06326g	LAMI0H14884g	SAKL0H17908g	KLTH0G14388g
L.A1	A1LA01-101938g	1	+	271	271	LANO0C05666g	LAME0G09472g	ZYRO0B11726g	LAWA0A06216g	LACI0H13564g	LAFE0H10132g	LADA0F04038g	LAFA0E06348g	LAMI0H14906g	SAKL0H17886g	KLTH0G14410g
L.A1	A1LA01-101916g	1	-	272	272	LANO0C05644g	LAME0G09494g	ZYRO0B11748g	LAWA0A06194g	LACI0H13542g	LAFE0H10110g	LADA0F04060g	LAFA0E06370g	LAMI0H14928g	SAKL0H17864g	KLTH0G14432g
L.A1	A1LA01-101894g	1	+	273	273	LANO0C05622g	LAME0G09516g	ZYRO0B11770g	LAWA0A06172g	LACI0H13520g	LAFE0H10088g	LADA0F04082g	LAFA0E06392g	LAMI0H14950g	SAKL0H17842g	KLTH0G14454g
L.A1	A1LA01-101872g	1	-	274	274	LANO0C05600g	LAME0G09538g	ZYRO0B11792g	LAWA0A06150g	LACI0H13498g	LAFE0H10066g	LADA0F04104g	LAFA0E06414g	LAMI0H14972g	SAKL0H17820g	KLTH0G14476g
L.A1	A1LA01-101850g	1	+	275	275	LANO0C05754g	LAME0G09384g	ZYRO0B11814g	LAWA0A06304g	LACI0H13476g	LAFE0H10044g	LADA0F03928g	LAFA0E06260g	LAMI0H14994g	SAKL0H17798g	KLTH0G14322g
L.A1	A1LA01-101828g	1	+	276	276	LANO0C05776g	LAME0G09362g	ZYRO0B11836g	LAWA0A06326g	LACI0H13454g	LAFE0H10022g	LADA0F03906g	LAFA0E06238g	LAMI0H15016g	SAKL0H17776g	KLTH0G14300g
L.A1	A1LA01-101806g	1	-	277	277	LANO0C05798g	LAME0G09340g	ZYRO0B11858g	LAWA0A06348g	LACI0H13432g	LAFE0H10000g	LADA0F03884g	LAFA0E06216g	LAMI0H15038g	SAKL0H17754g	KLTH0G14278g
L.A1	A1LA01-101784g	1	+	278	278	LANO0C05820g	LAME0G09318g	ZYRO0B11880g	LAWA0A06370g	LACI0H13410g	LAFE0H09978g	LADA0F03862g	LAFA0E06194g	LAMI0H15060g	SAKL0H17732g	KLTH0G14256g
L.A1	A1LA01-101762g	1	-	279	279	LANO0C05842g	LAME0G09296g	ZYRO0B11902g	LAWA0A06392g	LACI0H13388g	LAFE0H09956g	LADA0F03840g	LAFA0E06172g	LAMI0H15082g	SAKL0H17710g	KLTH0G14234g
L.A1	A1LA01-101740g	1	-	280	280	LANO0C05864g	LAME0G09274g	ZYRO0B11946g	LAWA0A06414g	LACI0H13366g	LAFE0H09934g		LAFA0E06150g		SAKL0H17688g	KLTH0G14212g
L.A1	A1LA01-101718g	1	+	281	281	LANO0C05886g	LAME0G09252g	ZYRO0B11968g	LAWA0A06436g	LACI0H13344g	LAFE0H09912g	LADA0F03818g	LAFA0E06128g	LAMI0H15104g	SAKL0H17666g	KLTH0G14190g
L.A1	A1LA01-101696g	1	+	282	282	LANO0C05908g	LAME0G09230g	ZYRO0B11990g	LAWA0A06502g	LACI0H13322g	LAFE0H09890g	LADA0F03796g	LAFA0E06106g	LAMI0H15126g	SAKL0H17556g	KLTH0G14146g
L.A1	A1LA01-101674g	1	+	283	283	LANO0C05930g	LAME0G09208g	ZYRO0B12012g	LAWA0A06524g	LACI0H13300g	LAFE0H09868g	LADA0F03774g	LAFA0E06084g	LAMI0H15148g	SAKL0H17534g	KLTH0G14124g
L.A1	A1LA01-101652g	1	+	284	284	LANO0C05952g	LAME0G09186g	ZYRO0C01980g	LAWA0A06546g	LACI0H13278g	LAFE0H09846g	LADA0F03752g	LAFA0E06062g	LAMI0H15170g	SAKL0H17512g	KLTH0G14102g
L.A1	A1LA01-101630g	1	-	285	285	LANO0C05974g	LAME0G09164g	ZYRO0C02002g	LAWA0A06568g	LACI0H13256g	LAFE0H09824g	LADA0F03730g	LAFA0E06040g	LAMI0H15192g	SAKL0H17490g	KLTH0G14080g
L.A1	A1LA01-101608g	1	-	286	286	LANO0C05996g	LAME0G09142g	ZYRO0C02024g	LAWA0A06590g	LACI0H13234g	LAFE0H09802g	LADA0F03708g	LAFA0E06018g	LAMI0H15214g	SAKL0H17468g	KLTH0G14058g
L.A1	A1LA01-101586g	1	+	287	287	LANO0C06018g	LAME0G09120g	ZYRO0B12034g	LAWA0A06612g	LACI0H13212g	LAFE0H09780g	LADA0F03686g	LAFA0E05996g	LAMI0H15236g	SAKL0H17446g	KLTH0G14036g
L.A1	A1LA01-101564g	1	+	288	288	LANO0C06040g	LAME0G09098g	ZYRO0C01958g	LAWA0A06634g	LACI0H13190g	LAFE0H09758g	LADA0F03664g	LAFA0E05974g	LAMI0H15280g	SAKL0H17402g	KLTH0G14014g
L.A1	A1LA01-101542g	1	-	289	289	LANO0C06062g	LAME0G09076g	ZYRO0C01936g	LAWA0A06656g	LACI0H13168g	LAFE0H09736g	LADA0F03642g	LAFA0E05952g	LAMI0H15302g	SAKL0H17380g	KLTH0G13992g
L.A1	A1LA01-101498g	1	-	290	290	LANO0C06106g	LAME0G09032g	ZYRO0C01914g	LAWA0A06700g	LACI0H13124g	LAFE0H09692g	LADA0F03598g	LAFA0E05908g	LAMI0H15324g	SAKL0H17336g	KLTH0G13948g
L.A1	A1LA01-101476g	1	-	291	291	LANO0C06128g	LAME0G09010g	ZYRO0C01892g	LAWA0A06722g	LACI0H13102g	LAFE0H09670g	LADA0F03576g	LAFA0E05886g	LAMI0H15346g	SAKL0H17314g	KLTH0G13926g
L.A1	A1LA01-101454g	1	-	292	292	LANO0C06150g	LAME0G08988g	ZYRO0C01848g	LAWA0A06766g	LACI0H13080g	LAFE0H09648g	LADA0F03554g	LAFA0E05864g	LAMI0H15368g	SAKL0H17248g	KLTH0G13882g
L.A1	A1LA01-101432g	1	+	293	293	LANO0C06172g	LAME0G08966g	ZYRO0C01826g	LAWA0A06788g	LACI0H13058g	LAFE0H09626g	LADA0F03532g	LAFA0E05842g	LAMI0H15390g	SAKL0H17226g	KLTH0G13860g
L.A1	A1LA01-101410g	1	-	294	294	LANO0C06194g	LAME0G08944g	ZYRO0C01804g	LAWA0A06810g	LACI0H13036g	LAFE0H09604g	LADA0F03510g	LAFA0E05820g	LAMI0H15412g	SAKL0H17204g	KLTH0G13838g
L.A1	A1LA01-101366g	1	-	295	295	LANO0C06260g	LAME0G08900g	ZYRO0C01782g	LAWA0A06854g	LACI0H12992g	LAFE0H09560g	LADA0F03466g	LAFA0E05776g	LAMI0H15456g	SAKL0H17160g	KLTH0G13794g
L.A1	A1LA01-101344g	1	-	296	296	LANO0C06282g	LAME0G08878g	ZYRO0C01738g	LAWA0A07866g	LACI0H12970g	LAFE0H09538g	LADA0F03444g	LAFA0E05754g	LAMI0H15478g	SAKL0H17138g	KLTH0G13772g
L.A1	A1LA01-101322g	1	+	297	297	LANO0C06304g	LAME0G08856g	ZYRO0C01716g	LAWA0A07844g	LACI0H12948g	LAFE0H09516g	LADA0F03422g	LAFA0E05732g	LAMI0H15500g	SAKL0H17094g	KLTH0G13750g
L.A1	A1LA01-101300g	1	-	298	298	LANO0C06326g	LAME0G08834g	ZYRO0C01694g		LACI0H12926g	LAFE0H09494g	LADA0F03400g	LAFA0E05710g	LAMI0H15522g	SAKL0H17072g	KLTH0G13728g
L.A1	A1LA01-101278g	1	+	299	299	LANO0C06348g	LAME0G08812g	ZYRO0C01672g	LAWA0A07800g	LACI0H12904g	LAFE0H09472g	LADA0F03378g	LAFA0E05688g	LAMI0H15544g	SAKL0H17050g	KLTH0G13706g
L.A1	A1LA01-101256g	1	+	300	300	LANO0C06370g	LAME0G08790g	ZYRO0C01650g	LAWA0A07778g	LACI0H12882g	LAFE0H09450g	LADA0F03356g	LAFA0E05666g	LAMI0H15566g	SAKL0H17028g	KLTH0G13684g
L.A1	A1LA01-101234g	1	-	301	301	LANO0C06392g	LAME0G08768g	ZYRO0C01628g	LAWA0A07756g	LACI0H12860g	LAFE0H09428g	LADA0F03334g	LAFA0E05644g	LAMI0H15588g	SAKL0H17006g	KLTH0G13662g
L.A1	A1LA01-101212g	1	+	302	302	LANO0C06414g	LAME0G08746g	ZYRO0C01606g	LAWA0A07734g	LACI0H12838g	LAFE0H09406g	LADA0F03312g	LAFA0E05622g	LAMI0H15610g	SAKL0H16984g	KLTH0G13640g
L.A1	A1LA01-101190g	1	-	303	303	LANO0C06436g	LAME0G08724g	ZYRO0C01584g	LAWA0A07712g	LACI0H12816g	LAFE0H09384g	LADA0F03290g	LAFA0E05600g	LAMI0H15632g	SAKL0H16962g	KLTH0G13618g
L.A1	A1LA01-101168g	1	+	304	304	LANO0C06480g	LAME0G08702g	ZYRO0C01562g	LAWA0A07690g	LACI0H12794g	LAFE0H09362g	LADA0F03268g	LAFA0E05578g	LAMI0H15654g	SAKL0H16940g	KLTH0G13596g
L.A1	A1LA01-101146g	1	+	305	305	LANO0C06502g	LAME0G08680g	ZYRO0C01540g	LAWA0A07668g	LACI0H12772g	LAFE0H09340g	LADA0F03246g	LAFA0E05556g	LAMI0H15676g	SAKL0H16918g	KLTH0G13574g
L.A1	A1LA01-101124g	1	-	306	306	LANO0C06524g	LAME0G08658g	ZYRO0C01518g	LAWA0A07646g	LACI0H12750g	LAFE0H09318g	LADA0F03224g	LAFA0E05534g	LAMI0H15698g	SAKL0H16896g	KLTH0G13552g
L.A1	A1LA01-101102g	1	-	307	307	LANO0C06546g	LAME0G08636g	ZYRO0C01496g	LAWA0A07624g	LACI0H12728g	LAFE0H09296g	LADA0F03202g	LAFA0E05512g	LAMI0H15720g	SAKL0H16874g	KLTH0G13530g
L.A1	A1LA01-101080g	1	+	308	308	LANO0C06568g	LAME0G08614g	ZYRO0C01474g	LAWA0A07602g	LACI0H12706g	LAFE0H09274g	LADA0F03180g	LAFA0E05490g	LAMI0H15742g	SAKL0H16852g	KLTH0G13508g
L.A1	A1LA01-101058g	1	+	309	309	LANO0C06590g	LAME0G08592g	ZYRO0C01452g	LAWA0A07580g	LACI0H12684g	LAFE0H09252g	LADA0F03158g	LAFA0E05468g	LAMI0H15764g	SAKL0H16830g	KLTH0G13486g
L.A1	A1LA01-101036g	1	+	310	310	LANO0C06612g	LAME0G08570g	ZYRO0C01430g	LAWA0A07492g	LACI0H12662g	LAFE0H09230g	LADA0F03136g	LAFA0E05446g	LAMI0H15808g	SAKL0H16808g	KLTH0G13464g
L.A1	A1LA01-101014g	1	+	311	311	LANO0C06634g	LAME0G08548g	ZYRO0D06908g	LAWA0A07536g	LACI0H12640g	LAFE0H09208g	LADA0F03114g	LAFA0E05424g	LAMI0H15786g	SAKL0H16786g	KLTH0G13442g
L.A1	A1LA01-100992g	1	-	312	312	LANO0C06656g	LAME0G08526g	ZYRO0D06886g	LAWA0A07514g	LACI0H12618g	LAFE0H09186g	LADA0F03092g	LAFA0E05402g	LAMI0H15830g	SAKL0H16764g	KLTH0G13420g
L.A1	A1LA01-100970g	1	+	313	313	LANO0C06678g	LAME0G08504g	ZYRO0D06864g	LAWA0A07492g	LACI0H12596g	LAFE0H09164g	LADA0F03070g	LAFA0E05380g	LAMI0H15852g	SAKL0H16742g	KLTH0G13398g
L.A1	A1LA01-100948g	1	-	314	314	LANO0C06700g	LAME0G08482g	ZYRO0D06842g	LAWA0A07470g	LACI0H12574g	LAFE0H09142g	LADA0F03048g	LAFA0E05358g	LAMI0H15874g	SAKL0H16720g	KLTH0G13376g
L.A1	A1LA01-100904g	1	-	315	315	LANO0C06744g	LAME0G08438g	ZYRO0D06820g	LAWA0A07426g	LACI0H12530g	LAFE0H09098g	LADA0F03026g	LAFA0E05314g	LAMI0H15918g	SAKL0H16676g	KLTH0G13332g
L.A1	A1LA01-100882g	1	-	316	316	LANO0C06766g	LAME0G08416g	ZYRO0D06798g	LAWA0A07404g	LACI0H12508g	LAFE0H09076g	LADA0F03004g	LAFA0E05292g	LAMI0H15940g	SAKL0H16654g	KLTH0G13310g
L.A1	A1LA01-100860g	1	+	317	317	LANO0C06788g	LAME0G08394g	ZYRO0D06776g		LACI0H12486g	LAFE0H09054g	LADA0F02982g	LAFA0E05270g	LAMI0H15962g	SAKL0H16632g	KLTH0G13288g
L.A1	A1LA01-100838g	1	-	318	318	LANO0C06810g	LAME0G08372g	ZYRO0D06754g	LAWA0A07360g	LACI0H12464g	LAFE0H09032g	LADA0F02960g	LAFA0E05248g	LAMI0H15984g	SAKL0H16610g	KLTH0G13266g
L.A1	A1LA01-100816g	1	-	319	319	LANO0C06832g	LAME0G08350g	ZYRO0D06732g	LAWA0A07338g	LACI0H12442g	LAFE0H09010g	LADA0F02938g	LAFA0E05226g	LAMI0H16006g	SAKL0H16588g	KLTH0G13244g
L.A1	A1LA01-100794g	1	+	320	320	LANO0C06854g	LAME0G08328g	ZYRO0D06710g	LAWA0A07316g	LACI0H12420g	LAFE0H08988g	LADA0F02916g	LAFA0E05204g	LAMI0H16028g	SAKL0H16566g	KLTH0G13222g
L.A1	A1LA01-100772g	1	-	321	321	LANO0C06876g	LAME0G08306g	ZYRO0D06688g		LACI0H12398g	LAFE0H08966g	LADA0F02894g			SAKL0H16544g	KLTH0G13200g
L.A1	A1LA01-100728g	1	-	322	322	LANO0C06898g	LAME0G08284g	ZYRO0D06666g	LAWA0A07294g	LACI0H12376g	LAFE0H08922g	LADA0F02872g	LAFA0E05182g	LAMI0H16050g	SAKL0H16500g	KLTH0G13178g
L.A1	A1LA01-100706g	1	+	323	323	LANO0C06920g	LAME0G08262g	ZYRO0D06644g	LAWA0A07272g	LACI0H12354g	LAFE0H08900g	LADA0F02850g	LAFA0E05160g	LAMI0H16072g	SAKL0H16478g	KLTH0G13156g
L.A1	A1LA01-100684g	1	-	324	324	LANO0C06942g	LAME0G08240g	ZYRO0D06622g	LAWA0A07250g	LACI0H12332g	LAFE0H08878g	LADA0F02828g	LAFA0E05138g	LAMI0H16094g	SAKL0H16456g	KLTH0G13134g
L.A1	A1LA01-100662g	1	+	325	325	LANO0C06964g	LAME0G08218g	ZYRO0D06600g	LAWA0A07228g	LACI0H12310g	LAFE0H08856g	LADA0F02806g	LAFA0E05116g	LAMI0H16116g	SAKL0H16434g	KLTH0G13112g
L.A1	A1LA01-100640g	1	+	326	326	LANO0C06986g	LAME0G08174g	ZYRO0D06578g	LAWA0A07206g	LACI0H12288g	LAFE0H08834g	LADA0F02784g	LAFA0E05072g	LAMI0H16138g	SAKL0H16412g	KLTH0G13090g
L.A1	A1LA01-100618g	1	+	327	327	LANO0C07008g	LAME0G08152g	ZYRO0D06556g	LAWA0A07184g	LACI0H12266g	LAFE0H08812g	LADA0F02762g	LAFA0E05050g	LAMI0H16160g	SAKL0H16390g	KLTH0G13068g
L.A1	A1LA01-100596g	1	+	328	328	LANO0C07030g	LAME0G08130g	ZYRO0D06534g		LACI0H12244g	LAFE0H08790g	LADA0F02740g	LAFA0E05028g	LAMI0H16182g	SAKL0H16368g	KLTH0G13046g
L.A1	A1LA01-100574g	1	-	329	329	LANO0C07052g	LAME0G08108g	ZYRO0D06512g	LAWA0A07140g	LACI0H12222g	LAFE0H08768g	LADA0F02718g	LAFA0E05006g	LAMI0H16204g	SAKL0H16346g	KLTH0G13024g
L.A1	A1LA01-100552g	1	-	330	330	LANO0C07074g	LAME0G08086g	ZYRO0D06490g	LAWA0A07118g	LACI0H12200g	LAFE0H08746g	LADA0F02696g	LAFA0E04984g	LAMI0H16226g	SAKL0H16324g	KLTH0G13002g
L.A1	A1LA01-100530g	1	-	331	331	LANO0C07096g	LAME0G08064g	ZYRO0D06468g	LAWA0A07096g	LACI0H12178g	LAFE0H08724g	LADA0F02674g	LAFA0E04962g	LAMI0H16248g	SAKL0H16302g	KLTH0G12980g
L.A1	A1LA01-100508g	1	+	332	332	LANO0C07118g	LAME0G08042g	ZYRO0D06446g	LAWA0A07074g	LACI0H12156g	LAFE0H08702g	LADA0F02652g	LAFA0E04940g	LAMI0H16270g	SAKL0H16280g	KLTH0G12958g
L.A1	A1LA01-100486g	1	-	333	333	LANO0C07140g	LAME0G08020g	ZYRO0D06424g	LAWA0A07052g	LACI0H12134g	LAFE0H08680g	LADA0F02630g	LAFA0E04918g	LAMI0H16292g	SAKL0H16258g	KLTH0G12936g
L.A1	A1LA01-100464g	1	-	334	334	LANO0C07162g	LAME0G07998g	ZYRO0D06380g	LAWA0A07030g	LACI0H12112g	LAFE0H08658g	LADA0F02608g	LAFA0E04896g	LAMI0H16314g	SAKL0H16214g	KLTH0G12892g
L.A1	A1LA01-100442g	1	+	335	335	LANO0C07184g	LAME0G07976g	ZYRO0D06358g	LAWA0A07008g	LACI0H12090g	LAFE0H08636g	LADA0F02586g	LAFA0E04874g	LAMI0H16336g	SAKL0H16192g	KLTH0G12870g
L.A1	A1LA01-100420g	1	-	336	336	LANO0C07206g	LAME0G07954g	ZYRO0D06336g	LAWA0A06986g	LACI0H12068g	LAFE0H08614g	LADA0F02564g	LAFA0E04852g	LAMI0H16358g	SAKL0H16170g	KLTH0G12848g
L.A1	A1LA01-100398g	1	-	337	337	LANO0C07228g	LAME0G07932g	ZYRO0D06314g	LAWA0A06964g	LACI0H12046g	LAFE0H08592g	LADA0F02542g	LAFA0E04830g		SAKL0H16148g	KLTH0G12826g
L.A1	A1LA01-100376g	1	-	338	338	LANO0C07272g	LAME0G07888g	ZYRO0D06270g		LACI0H12002g	LAFE0H08548g	LADA0F02498g	LAFA0E04786g	LAMI0H16402g	SAKL0H16104g	KLTH0G12782g
L.A1	A1LA01-100354g	1	+	339	339			ZYRO0D06248g							SAKL0H16082g
L.A1	A1LA01-100332g	1	-	340	340	LANO0C07294g	LAME0G07866g	ZYRO0D06204g	LAWA0A06898g	LACI0H11980g	LAFE0H08526g	LADA0F02476g	LAFA0E04764g	LAMI0H16424g	SAKL0H16060g	KLTH0G12760g
L.A1	A1LA01-100310g	1	+	341	341	LANO0C07316g	LAME0G07844g	ZYRO0D06182g	LAWA0A07954g	LACI0H11958g	LAFE0H08504g	LADA0F02454g	LAFA0E04742g	LAMI0H16446g	SAKL0H16038g	KLTH0G12738g
L.A1	A1LA01-100288g	1	-	342	342	LANO0C07338g	LAME0G07822g	ZYRO0D06160g	LAWA0A07976g	LACI0H11936g	LAFE0H08482g	LADA0F02432g	LAFA0E04720g	LAMI0H16468g	SAKL0H16016g	KLTH0G12716g
L.A1	A1LA01-100266g	1	+	343	343	LANO0C07360g	LAME0G07800g	ZYRO0D06116g	LAWA0A08020g	LACI0H11914g	LAFE0H08438g	LADA0F02410g	LAFA0E04698g	LAMI0H16490g	SAKL0H15972g	KLTH0G12672g
L.A1	A1LA01-100244g	1	-	344	344	LANO0C07382g	LAME0G07778g	ZYRO0D06094g	LAWA0A08042g	LACI0H11892g	LAFE0H08416g	LADA0F02388g	LAFA0E04676g	LAMI0H16512g	SAKL0H15950g	KLTH0G12650g
L.A1	A1LA01-100222g	1	+	345	345	LANO0C07404g	LAME0G07756g	ZYRO0D06072g	LAWA0A08064g	LACI0H11870g	LAFE0H08394g	LADA0F02366g	LAFA0E04654g	LAMI0H16534g	SAKL0H15928g	KLTH0G12628g
L.A1	A1LA01-100200g	1	-	346	346	LANO0C07426g	LAME0G07734g	ZYRO0D06050g		LACI0H11848g	LAFE0H08372g	LADA0F02344g	LAFA0E04632g	LAMI0H16556g	SAKL0H15906g
L.A1	A1LA01-100178g	1	+	347	347		LAME0G07712g	ZYRO0D06028g	LAWA0A08108g	LACI0H11826g	LAFE0H08350g	LADA0F02322g	LAFA0E04610g	LAMI0H16578g	SAKL0H15884g	KLTH0G12606g
L.A1	A1LA01-100156g	1	+	348	348	LANO0C07470g	LAME0G07690g	ZYRO0D06006g	LAWA0A08130g	LACI0H11804g	LAFE0H08328g	LADA0F02300g	LAFA0E04588g	LAMI0H16600g	SAKL0H15862g	KLTH0G12584g
L.A1	A1LA01-100134g	1	-	349	349	LANO0C07492g	LAME0G07668g	ZYRO0D05984g	LAWA0A08152g	LACI0H11782g	LAFE0H08306g	LADA0F02278g	LAFA0E04566g	LAMI0H16622g	SAKL0H15840g	KLTH0G12562g
L.A1	A1LA01-100112g	1	-	350	350	LANO0C07514g	LAME0G07646g	ZYRO0D05962g	LAWA0A08174g	LACI0H11760g	LAFE0H08284g	LADA0F02256g	LAFA0E04544g	LAMI0H16644g	SAKL0H15818g	KLTH0G12540g
L.A1	A1LA01-100090g	1	+	351	351	LANO0C07536g	LAME0G07624g	ZYRO0D05940g	LAWA0A08196g	LACI0H11738g	LAFE0H08262g	LADA0F02234g	LAFA0E04522g	LAMI0H16666g	SAKL0H15796g	KLTH0G12518g
L.A1	A1LA01-100068g	1	-	352	352	LANO0C07558g	LAME0G07602g	ZYRO0D05918g	LAWA0A08207g	LACI0H11716g	LAFE0H08240g	LADA0F02212g	LAFA0E04500g	LAMI0H16688g	SAKL0H15774g	KLTH0G12496g
L.A1	A1LA01-100046g	1	-	353	353	LANO0C07580g	LAME0G07580g	ZYRO0D05896g	LAWA0A08218g	LACI0H11694g	LAFE0H08218g		LAFA0E04478g	LAMI0H16710g	SAKL0H15752g	KLTH0G12474g
L.A1	A1LA01-100024g	1	+	354	354	LANO0C07602g	LAME0G07558g	ZYRO0D05874g	LAWA0A08240g	LACI0H11672g	LAFE0H08196g	LADA0F02190g	LAFA0E04456g	LAMI0H16732g	SAKL0H15730g	KLTH0G12452g
L.A1	A1LA01-100002g	1	-	355	355	LANO0C07624g	LAME0G07536g	ZYRO0D05852g	LAWA0A08262g	LACI0H11650g	LAFE0H08174g	LADA0F02168g	LAFA0E04434g	LAMI0H16754g	SAKL0H15708g	KLTH0G12430g
L.A1	A1LA01-099980g	1	-	356	356	LANO0C07646g	LAME0G07514g	ZYRO0D05830g	LAWA0A08284g	LACI0H11628g	LAFE0H08152g	LADA0F02146g	LAFA0E04412g	LAMI0H16776g	SAKL0H15686g	KLTH0G12408g
L.A1	A1LA01-099958g	1	-	357	357			ZYRO0F10318g	LAWA0A08306g	LACI0H11606g	LAFE0H08130g			LAMI0H16798g	SAKL0H15664g	KLTH0G12386g
L.A1	A1LA01-099914g	1	-	358	358	LANO0C07668g	LAME0G07492g	ZYRO0F10340g	LAWA0A08350g	LACI0H11562g	LAFE0H08064g	LADA0F02124g	LAFA0E04390g	LAMI0H16842g	SAKL0H15598g	KLTH0G12342g
L.A1	A1LA01-099892g	1	+	359	359	LANO0C07690g	LAME0G07470g	ZYRO0F10362g	LAWA0A08372g	LACI0H11540g	LAFE0H08042g	LADA0F02102g	LAFA0E04368g	LAMI0H16864g	SAKL0H15576g	KLTH0G12320g
L.A1	A1LA01-099870g	1	+	360	360	LANO0C07712g	LAME0G07448g	ZYRO0F10384g	LAWA0A08394g	LACI0H11518g	LAFE0H08020g	LADA0F02080g	LAFA0E04346g	LAMI0H16886g	SAKL0H15554g	KLTH0G12298g
L.A1	A1LA01-099848g	1	+	361	361	LANO0C07734g	LAME0G07426g	ZYRO0F10406g	LAWA0A08416g	LACI0H11496g	LAFE0H07998g	LADA0F02058g	LAFA0E04324g	LAMI0H16908g	SAKL0H15532g	KLTH0G12276g
L.A1	A1LA01-099826g	1	-	362	362	LANO0C07756g	LAME0G07404g	ZYRO0F10428g	LAWA0A08438g	LACI0H11474g	LAFE0H07976g	LADA0F02036g	LAFA0E04302g	LAMI0H16930g	SAKL0H15488g	KLTH0G12254g
L.A1	A1LA01-099804g	1	-	363	363	LANO0C07778g	LAME0G07382g	ZYRO0F10450g	LAWA0A08460g	LACI0H11452g	LAFE0H07954g	LADA0F02014g	LAFA0E04280g	LAMI0H16952g	SAKL0H15466g	KLTH0G12232g
L.A1	A1LA01-099782g	1	+	364	364	LANO0C07800g	LAME0G07360g	ZYRO0F10472g	LAWA0A08482g	LACI0H11430g	LAFE0H07932g	LADA0F01992g	LAFA0E04258g	LAMI0H16974g	SAKL0H15444g	KLTH0G12210g
L.A1	A1LA01-099760g	1	-	365	365	LANO0C07822g	LAME0G07338g	ZYRO0F10494g	LAWA0A08504g	LACI0H11408g	LAFE0H07910g	LADA0F01970g	LAFA0E04236g	LAMI0H16996g	SAKL0H15422g	KLTH0G12188g
L.A1	A1LA01-099738g	1	+	366	366	LANO0H04918g	LAME0F15588g	ZYRO0F10516g	LAWA0F07800g	LACI0H11386g	LAFE0H07888g	LADA0G06414g	LAFA0F15742g	LAMI0H17018g	SAKL0H15400g	KLTH0G12166g
L.A1	A1LA01-099716g	1	+	367	367	LANO0H04940g	LAME0F15566g	ZYRO0F10538g	LAWA0F07822g	LACI0H11364g	LAFE0H07866g	LADA0G06392g	LAFA0F15764g	LAMI0H17040g	SAKL0H15378g	KLTH0G12078g
L.A1	A1LA01-099672g	1	-	368	368	LANO0H04984g	LAME0F15522g	ZYRO0F10560g	LAWA0F07866g	LACI0H11320g	LAFE0H07822g	LADA0G06348g	LAFA0F15808g	LAMI0H17084g	SAKL0H15334g	KLTH0G12100g
L.A1	A1LA01-099650g	1	+	369	369	LANO0H05006g	LAME0G11254g	ZYRO0F13662g	LAWA0F07888g	LACI0H11298g	LAFE0H07800g	LADA0G06326g	LAFA0F15830g	LAMI0H17106g	SAKL0H15312g	KLTH0G11924g
L.A1	A1LA01-099628g	1	-	370	370	LANO0H05028g	LAME0G11276g	ZYRO0F13684g	LAWA0F07910g	LACI0H11276g	LAFE0H07778g	LADA0G06304g	LAFA0F15852g	LAMI0H17128g	SAKL0H15290g	KLTH0G11902g
L.A1	A1LA01-099606g	1	-	371	371	LANO0H05050g	LAME0G11298g	ZYRO0F13706g	LAWA0F07932g	LACI0H11254g	LAFE0H07756g	LADA0G06282g	LAFA0F15874g	LAMI0H17150g	SAKL0H15268g	KLTH0G11880g
L.A1	A1LA01-099584g	1	+	372	372	LANO0H05072g	LAME0G11320g	ZYRO0F13728g	LAWA0F07976g	LACI0H11232g	LAFE0H07734g	LADA0G06260g	LAFA0E19328g	LAMI0H17172g	SAKL0H15202g	KLTH0G11836g
L.A1	A1LA01-099562g	1	+	373	373	LANO0H05094g	LAME0G11342g	ZYRO0F13750g	LAWA0F07998g	LACI0H11210g	LAFE0H07712g	LADA0G06238g	LAFA0E19350g	LAMI0H17194g	SAKL0H15180g	KLTH0G11814g
L.A1	A1LA01-099540g	1	+	374	374	LANO0H05116g	LAME0G11364g	ZYRO0F13772g	LAWA0F08020g	LACI0H11188g	LAFE0H07690g	LADA0G06216g	LAFA0E19372g		SAKL0H15158g	KLTH0G11792g
L.A1	A1LA01-099518g	1	+	375	375	LANO0H05138g	LAME0G11386g	ZYRO0F13794g	LAWA0F08042g	LACI0H11166g	LAFE0H07668g	LADA0G06194g	LAFA0E19394g	LAMI0H17238g	SAKL0H15136g	KLTH0G11770g
L.A1	A1LA01-099496g	1	+	376	376	LANO0H05160g	LAME0G11320g	ZYRO0F13816g		LACI0H11144g	LAFE0H07646g	LADA0G06172g	LAFA0E19416g	LAMI0H17260g	SAKL0H15114g	KLTH0G11748g
L.A1	A1LA01-099474g	1	+	377	377	LANO0H05182g	LAME0G11430g	ZYRO0F13838g		LACI0H11122g	LAFE0H07624g	LADA0G06150g	LAFA0E19438g	LAMI0H17282g	SAKL0H15092g	KLTH0G11726g
L.A1	A1LA01-099452g	1	+	378	378	LANO0H05204g	LAME0G11452g	ZYRO0F13860g		LACI0H11100g	LAFE0H07602g	LADA0G06128g	LAFA0E19460g	LAMI0H17304g	SAKL0H15070g	KLTH0G11704g
L.A1	A1LA01-099430g	1	-	379	379	LANO0H05226g	LAME0G11474g	ZYRO0F13882g		LACI0H11078g	LAFE0H07580g	LADA0G06106g	LAFA0E19482g	LAMI0H17326g	SAKL0H15048g	KLTH0G11682g
L.A1	A1LA01-099408g	1	+	380	380	LANO0H05248g	LAME0G11496g	ZYRO0F13904g	LAWA0F08086g	LACI0H11056g	LAFE0H07558g	LADA0G06084g	LAFA0E19504g	LAMI0H17348g	SAKL0H15026g	KLTH0G11671g
L.A1	A1LA01-099386g	1	-	381	381	LANO0H05270g	LAME0G11518g	ZYRO0F13926g	LAWA0F08108g	LACI0H11034g	LAFE0H07536g	LADA0G06062g	LAFA0E19548g	LAMI0H17370g	SAKL0H15004g	KLTH0G11660g
L.A1	A1LA01-099364g	1	+	382	382	LANO0H05072g	LAME0G11540g	ZYRO0F13948g	LAWA0F08130g	LACI0H11012g	LAFE0H07514g	LADA0G06040g	LAFA0E19526g	LAMI0H17392g	SAKL0H14982g	KLTH0G11638g
L.A1	A1LA01-099342g	1	+	383	383	LANO0H05314g	LAME0G11562g	ZYRO0F13970g	LAWA0F08152g	LACI0H10990g	LAFE0H07492g	LADA0G06018g	LAFA0E19570g	LAMI0H17414g	SAKL0H14960g	KLTH0G11616g
L.A1	A1LA01-099320g	1	+	384	384	LANO0H05336g	LAME0G11584g	ZYRO0F14014g	LAWA0F08174g	LACI0H10968g	LAFE0H07470g	LADA0G05996g	LAFA0E19592g	LAMI0H17436g	SAKL0H14938g	KLTH0G11594g
L.A1	A1LA01-099298g	1	+	385	385	LANO0H05358g	LAME0G11606g	ZYRO0F14036g	LAWA0F08196g	LACI0H10946g	LAFE0H07448g	LADA0G05974g	LAFA0E19614g	LAMI0H17458g	SAKL0H14916g	KLTH0G11572g
L.A1	A1LA01-099276g	1	-	386	386	LANO0H05380g	LAME0G11628g	ZYRO0F14058g	LAWA0F08218g	LACI0H10924g	LAFE0H07426g	LADA0G05952g	LAFA0E19636g	LAMI0H17480g	SAKL0H14894g	KLTH0G11550g
L.A1	A1LA01-099254g	1	-	387	387	LANO0H05402g	LAME0G11650g	ZYRO0F14080g	LAWA0F08240g	LACI0H10902g	LAFE0H07404g	LADA0G05930g	LAFA0E19658g	LAMI0H17502g	SAKL0H14872g	KLTH0G11528g
L.A1	A1LA01-099232g	1	+	388	388	LANO0H05424g	LAME0G11672g	ZYRO0F14102g	LAWA0F08262g	LACI0H10880g	LAFE0H07382g	LADA0G05908g	LAFA0E19680g	LAMI0H17524g	SAKL0H14850g	KLTH0G11506g
L.A1	A1LA01-099210g	1	-	389	389	LANO0H05446g	LAME0G11694g	ZYRO0F14124g	LAWA0F08284g	LACI0H10858g	LAFE0H07360g	LADA0G05886g	LAFA0E19702g	LAMI0H17546g	SAKL0H14828g	KLTH0G11484g
L.A1	A1LA01-099188g	1	+	390	390	LANO0H05468g	LAME0G11716g	ZYRO0F14146g	LAWA0F08306g	LACI0H10836g	LAFE0H07338g	LADA0G05864g	LAFA0E19724g	LAMI0H17568g	SAKL0H14806g	KLTH0G11462g
L.A1	A1LA01-099166g	1	+	391	391	LANO0H05490g		ZYRO0F14168g	LAWA0F08328g	LACI0H10814g	LAFE0H07316g	LADA0G05842g	LAFA0E19746g		SAKL0H14784g	KLTH0G11440g
L.A1	A1LA01-099144g	1	-	392	392	LANO0H05512g	LAME0G11738g	ZYRO0F14190g	LAWA0F08350g	LACI0H10814g	LAFE0H07316g	LADA0G05820g	LAFA0E19768g	LAMI0H17590g	SAKL0H14762g	KLTH0G11418g
L.A1	A1LA01-099122g	1	-	393	393	LANO0H05534g	LAME0G11760g	ZYRO0F14212g	LAWA0F08372g	LACI0H10792g	LAFE0H07294g	LADA0G05798g	LAFA0E19790g	LAMI0H17612g	SAKL0H14740g	KLTH0G11396g
L.A1	A1LA01-099100g	1	+	394	394	LANO0H05556g	LAME0G11782g	ZYRO0F14234g	LAWA0F08394g	LACI0H10770g	LAFE0H07272g	LADA0G05776g	LAFA0E19812g	LAMI0H17634g	SAKL0H14718g	KLTH0G11374g
L.A1	A1LA01-099078g	1	+	395	395	LANO0H05578g	LAME0G11804g	ZYRO0F14256g	LAWA0F08416g	LACI0H10748g	LAFE0H07250g	LADA0G05754g	LAFA0E19834g	LAMI0H17656g	SAKL0H14696g	KLTH0G11352g
L.A1	A1LA01-099056g	1	+	396	396	LANO0H05600g	LAME0G11826g	ZYRO0F14278g	LAWA0F08438g	LACI0H10726g	LAFE0H07228g	LADA0G05732g	LAFA0E19856g	LAMI0H17678g	SAKL0H14674g	KLTH0G11330g
L.A1	A1LA01-099034g	1	-	397	397	LANO0H05622g	LAME0G11848g	ZYRO0F14300g	LAWA0F08460g	LACI0H10704g	LAFE0H07206g	LADA0G05710g	LAFA0E19878g	LAMI0H17700g	SAKL0H14652g	KLTH0G11308g
L.A1	A1LA01-099012g	1	-	398	398	LANO0H05644g	LAME0G11870g	ZYRO0F14322g	LAWA0F08482g	LACI0H10682g	LAFE0H07184g	LADA0G05688g	LAFA0E19900g	LAMI0H17722g	SAKL0H14630g	KLTH0G11286g
L.A1	A1LA01-098990g	1	+	399	399	LANO0H05666g	LAME0G11892g	ZYRO0F14344g	LAWA0F08504g	LACI0H10660g	LAFE0H07162g	LADA0G05666g	LAFA0E19922g	LAMI0H17744g	SAKL0H14608g	KLTH0G11264g
L.A1	A1LA01-098968g	1	-	400	400	LANO0H05688g	LAME0G11914g	ZYRO0F14366g	LAWA0F08526g	LACI0H10638g	LAFE0H07140g	LADA0G05644g	LAFA0E19944g	LAMI0H17766g	SAKL0H14586g	KLTH0G11242g
L.A1	A1LA01-098946g	1	-	401	401	LANO0H05710g	LAME0G11936g	ZYRO0F14388g	LAWA0F08548g	LACI0H10616g	LAFE0H07118g	LADA0G05622g	LAFA0E19966g	LAMI0H17788g	SAKL0H14564g	KLTH0G11220g
L.A1	A1LA01-098924g	1	-	402	402	LANO0H05732g	LAME0G11958g	ZYRO0F14410g	LAWA0F08570g	LACI0H10594g	LAFE0H07096g	LADA0G05600g	LAFA0E19988g	LAMI0H17810g	SAKL0H14542g	KLTH0G11198g
L.A1	A1LA01-098902g	1	-	403	403	LANO0G08636g	LAME0E04324g	ZYRO0F14432g	LAWA0G03092g	LACI0H10572g	LAFE0H07074g	LADA0C01596g	LAFA0G08658g	LAMI0H17832g	SAKL0H14520g	KLTH0F09196g
L.A1	A1LA01-098880g	1	+	404	404	LANO0G08592g	LAME0E04302g	ZYRO0F14454g	LAWA0G03070g	LACI0H10550g	LAFE0H07052g	LADA0C01574g	LAFA0G08636g	LAMI0H17854g	SAKL0H14498g	KLTH0F09174g
L.A1	A1LA01-098858g	1	+	405	405	LANO0G08570g	LAME0E04280g	ZYRO0F14498g	LAWA0G03048g	LACI0H10528g	LAFE0H07030g	LADA0C01552g	LAFA0G08614g	LAMI0H17876g	SAKL0H14454g	KLTH0F09130g
L.A1	A1LA01-098836g	1	+	406	406	LANO0G08548g	LAME0E04258g	ZYRO0F14520g	LAWA0G03026g	LACI0H10506g	LAFE0H07008g	LADA0C01530g	LAFA0G08592g	LAMI0H17898g	SAKL0H14432g	KLTH0F09108g
L.A1	A1LA01-098814g	1	-	407	407	LANO0G08526g	LAME0E04236g	ZYRO0F14542g	LAWA0G03004g	LACI0H10484g	LAFE0H06986g	LADA0C01508g	LAFA0G08570g	LAMI0H17920g	SAKL0H14410g	KLTH0F09086g
L.A1	A1LA01-098770g	1	+	408	408	LANO0G08504g	LAME0E04192g	ZYRO0C03718g	LAWA0G02960g	LACI0H10242g	LAFE0H06766g	LADA0C01464g	LAFA0G08526g	LAMI0H18184g	SAKL0H14234g	KLTH0F09020g
L.A1	A1LA01-098748g	1	-	409	409	LANO0G08482g	LAME0E04170g	ZYRO0C03740g	LAWA0G02938g	LACI0H10220g	LAFE0H06744g	LADA0C01442g	LAFA0G08504g	LAMI0H18206g	SAKL0H14212g	KLTH0F08998g
L.A1	A1LA01-098726g	1	+	410	410	LANO0G08460g	LAME0E04148g	ZYRO0C03762g	LAWA0G02916g	LACI0H10198g	LAFE0H06722g	LADA0C01420g	LAFA0G08482g	LAMI0H18228g	SAKL0H14190g	KLTH0F08976g
L.A1	A1LA01-098704g	1	-	411	411	LANO0G08438g	LAME0E04126g	ZYRO0C03806g	LAWA0G02894g	LACI0H10176g	LAFE0H06700g	LADA0C01398g	LAFA0G08460g	LAMI0H18250g	SAKL0H14168g	KLTH0F08954g
L.A1	A1LA01-098682g	1	+	412	412	LANO0G08416g	LAME0E04104g	ZYRO0C03828g	LAWA0G02872g	LACI0H10154g	LAFE0H06678g	LADA0C01376g	LAFA0G08438g	LAMI0H18272g	SAKL0H14146g	KLTH0F08932g
L.A1	A1LA01-098660g	1	-	413	413	LANO0G08394g	LAME0E04082g	ZYRO0C03850g	LAWA0G02850g	LACI0H10132g	LAFE0H06656g	LADA0C01354g	LAFA0G08416g	LAMI0H18294g	SAKL0H14124g	KLTH0F08910g
L.A1	A1LA01-098638g	1	+	414	414	LANO0G08372g	LAME0E04060g	ZYRO0C03872g		LACI0H10110g	LAFE0H06634g	LADA0C01332g	LAFA0G08394g	LAMI0H18316g	SAKL0H14102g	KLTH0F08888g
L.A1	A1LA01-098616g	1	-	415	415	LANO0G08350g	LAME0E04038g	ZYRO0C03894g	LAWA0G02828g	LACI0H10088g	LAFE0H06612g	LADA0C01310g	LAFA0G08372g	LAMI0H18338g	SAKL0H14080g	KLTH0F08866g
L.A1	A1LA01-098594g	1	+	416	416	LANO0G08328g	LAME0E04016g	ZYRO0C03916g	LAWA0G02806g	LACI0H10066g	LAFE0H06590g	LADA0C01288g	LAFA0G08350g	LAMI0H18360g	SAKL0H14058g	KLTH0F08844g
L.A1	A1LA01-098572g	1	-	417	417	LANO0G08306g	LAME0E03994g	ZYRO0C03938g		LACI0H10044g	LAFE0H06568g	LADA0C01266g	LAFA0G08328g		SAKL0H14036g	KLTH0F08822g
L.A1	A1LA01-098550g	1	+	418	418	LANO0G08284g	LAME0E03972g	ZYRO0C03960g	LAWA0G02762g	LACI0H10022g	LAFE0H06546g	LADA0C01244g	LAFA0G08306g	LAMI0H18382g	SAKL0H13992g	KLTH0F08800g
L.A1	A1LA01-098528g	1	-	419	419	LANO0G08262g	LAME0E03950g	ZYRO0C03982g	LAWA0G02740g	LACI0H10000g	LAFE0H06524g	LADA0C01222g	LAFA0G08284g	LAMI0H18404g	SAKL0H13970g	KLTH0F08778g
L.A1	A1LA01-098506g	1	+	420	420	LANO0G08240g	LAME0E03928g	ZYRO0C04004g	LAWA0G02718g	LACI0H09978g	LAFE0H06502g	LADA0C01200g	LAFA0G08152g	LAMI0H18426g	SAKL0H13948g	KLTH0F08756g
L.A1	A1LA01-098484g	1	+	421	421	LANO0G08218g	LAME0E03906g	ZYRO0C04026g	LAWA0G02696g	LACI0H09956g	LAFE0H06480g	LADA0C01178g	LAFA0G08240g	LAMI0H18448g	SAKL0H13926g	KLTH0F08734g
L.A1	A1LA01-098440g	1	-	422	422	LANO0G08174g	LAME0E03862g	ZYRO0C04070g	LAWA0G02652g	LACI0H09912g	LAFE0H06436g	LADA0C01134g	LAFA0G08196g	LAMI0H18492g	SAKL0H13882g	KLTH0F08690g
L.A1	A1LA01-098418g	1	-	423	423	LANO0G08152g	LAME0E03840g	ZYRO0C04092g	LAWA0G02630g	LACI0H09890g	LAFE0H06414g	LADA0C01112g	LAFA0G08174g	LAMI0H18514g	SAKL0H13860g	KLTH0F08668g
L.A1	A1LA01-098396g	1	-	424	424	LANO0G08130g	LAME0E03818g	ZYRO0C04114g	LAWA0G02608g	LACI0H09868g	LAFE0H06392g	LADA0C01090g	LAFA0G08152g	LAMI0H18536g	SAKL0H13838g	KLTH0F08646g
L.A1	A1LA01-098374g	1	+	425	425	LANO0G08108g	LAME0E03796g	ZYRO0C04136g	LAWA0G02586g	LACI0H09846g	LAFE0H06370g	LADA0C01068g	LAFA0G08130g	LAMI0H18558g	SAKL0H13816g	KLTH0F08624g
L.A1	A1LA01-098352g	1	+	426	426	LANO0G08086g	LAME0E03774g	ZYRO0C04158g	LAWA0G02564g	LACI0H09824g	LAFE0H06348g	LADA0C01046g	LAFA0G08108g	LAMI0H18580g	SAKL0H13794g	KLTH0F08602g
L.A1	A1LA01-098330g	1	+	427	427	LANO0G08064g	LAME0E03752g	ZYRO0C04180g	LAWA0G02542g	LACI0H09802g	LAFE0H06326g	LADA0C01024g	LAFA0G08086g	LAMI0H18602g	SAKL0H13772g	KLTH0F08580g
L.A1	A1LA01-098308g	1	+	428	428	LANO0G08042g	LAME0E03730g	ZYRO0C04202g	LAWA0G02520g	LACI0H09780g	LAFE0H06304g	LADA0C01002g	LAFA0G08064g	LAMI0H18624g	SAKL0H13750g	KLTH0F08558g
L.A1	A1LA01-098286g	1	-	429	429	LANO0G08020g	LAME0E03708g	ZYRO0C04224g	LAWA0G02498g	LACI0H09758g	LAFE0H06282g	LADA0C00980g	LAFA0G08042g	LAMI0H18646g	SAKL0H13728g	KLTH0F08536g
L.A1	A1LA01-098264g	1	+	430	430	LANO0G07998g	LAME0E03686g	ZYRO0C04246g	LAWA0G02476g	LACI0H09736g	LAFE0H06260g	LADA0C00958g	LAFA0G08020g	LAMI0H18668g	SAKL0H13706g	KLTH0F08514g
L.A1	A1LA01-098242g	1	-	431	431	LANO0G07976g	LAME0E03664g	ZYRO0C04268g	LAWA0G02454g	LACI0H09714g	LAFE0H06238g	LADA0C00936g	LAFA0G07998g	LAMI0H18690g	SAKL0H13684g	KLTH0F08492g
L.A1	A1LA01-098220g	1	-	432	432	LANO0G07954g	LAME0E03642g	ZYRO0C04290g	LAWA0G02432g	LACI0H09692g	LAFE0H06216g	LADA0C00914g	LAFA0G07976g	LAMI0H18712g	SAKL0H13662g	KLTH0F08470g
L.A1	A1LA01-098198g	1	+	433	433	LANO0G07932g	LAME0E03620g	ZYRO0C04312g	LAWA0G02410g	LACI0H09670g	LAFE0H06194g	LADA0C00892g	LAFA0G07954g	LAMI0H18734g	SAKL0H13640g	KLTH0F08448g
L.A1	A1LA01-098176g	1	-	434	434	LANO0G07910g	LAME0E03598g	ZYRO0C04334g	LAWA0G02388g	LACI0H09648g	LAFE0H06172g	LADA0C00870g	LAFA0G07932g	LAMI0H18756g	SAKL0H13618g	KLTH0F08426g
L.A1	A1LA01-098154g	1	-	435	435	LANO0G07888g	LAME0E03576g	ZYRO0C04356g		LACI0H09626g	LAFE0H06150g	LADA0C00848g	LAFA0G07910g	LAMI0H18778g	SAKL0H13596g	KLTH0F08404g
L.A1	A1LA01-098132g	1	-	436	436	LANO0G07866g	LAME0E03554g	ZYRO0C04378g	LAWA0G02344g	LACI0H09604g	LAFE0H06128g	LADA0C00826g	LAFA0G07888g	LAMI0H18800g	SAKL0H13574g	KLTH0F08382g
L.A1	A1LA01-098110g	1	+	437	437	LANO0G07844g	LAME0E03532g	ZYRO0C04400g	LAWA0G02322g	LACI0H09582g	LAFE0H06106g	LADA0C00804g	LAFA0G07866g	LAMI0H18822g	SAKL0H13552g	KLTH0F08360g
L.A1	A1LA01-098088g	1	-	438	438	LANO0G07822g	LAME0E03510g	ZYRO0C04422g	LAWA0G02300g	LACI0H09560g	LAFE0H06084g	LADA0C00782g	LAFA0G07844g	LAMI0H18844g	SAKL0H13530g	KLTH0F08338g
L.A1	A1LA01-098066g	1	+	439	439	LANO0G07800g	LAME0E03488g	ZYRO0C04444g	LAWA0G02278g	LACI0H09538g	LAFE0H06062g	LADA0C00760g	LAFA0G07822g	LAMI0H18866g	SAKL0H13508g	KLTH0F08316g
L.A1	A1LA01-098044g	1	-	440	440	LANO0G07778g	LAME0E03466g	ZYRO0C04466g	LAWA0G02256g	LACI0H09516g	LAFE0H06040g	LADA0C00738g	LAFA0G07800g	LAMI0H18888g	SAKL0H13486g	KLTH0F08294g
L.A1	A1LA01-098022g	1	+	441	441	LANO0G07756g	LAME0E03444g	ZYRO0C04488g	LAWA0G02234g	LACI0H09494g	LAFE0H06018g	LADA0C00716g	LAFA0G07778g	LAMI0H18910g	SAKL0H13464g	KLTH0F08272g
L.A1	A1LA01-098000g	1	-	442	442	LANO0G07734g	LAME0E03422g	ZYRO0C04510g	LAWA0G02212g	LACI0H09472g	LAFE0H05996g	LADA0C00694g	LAFA0G07756g	LAMI0H18932g	SAKL0H13442g	KLTH0F08250g
L.A1	A1LA01-097978g	1	+	443	443	LANO0G07712g	LAME0E03400g	ZYRO0C04532g	LAWA0G02201g	LACI0H09450g	LAFE0H05974g	LADA0C00672g	LAFA0G07734g	LAMI0H18976g	SAKL0H13420g	KLTH0F08228g
L.A1	A1LA01-097956g	1	-	444	444	LANO0G07690g	LAME0E03378g	ZYRO0C04554g	LAWA0G02190g	LACI0H09428g	LAFE0H05952g	LADA0C00650g	LAFA0G07712g	LAMI0H18998g	SAKL0H13398g	KLTH0F08206g
L.A1	A1LA01-097934g	1	+	445	445	LANO0G07668g	LAME0E03356g	ZYRO0C04576g	LAWA0G02168g	LACI0H09406g	LAFE0H05930g	LADA0C00628g	LAFA0G07690g	LAMI0H19020g	SAKL0H13376g	KLTH0F08184g
L.A1	A1LA01-097912g	1	-	446	446	LANO0G07646g	LAME0E03334g	ZYRO0C04598g	LAWA0G02146g	LACI0H09384g	LAFE0H05908g	LADA0C00606g	LAFA0G07668g	LAMI0H19042g	SAKL0H13354g	KLTH0F08162g
L.A1	A1LA01-097890g	1	+	447	447	LANO0G07624g	LAME0E03246g	ZYRO0C04620g	LAWA0G02124g	LACI0H09362g	LAFE0H05886g	LADA0C00584g	LAFA0G07646g	LAMI0H19064g	SAKL0H13332g	KLTH0F08140g
L.A1	A1LA01-097868g	1	-	448	448	LANO0G07602g	LAME0E03268g	ZYRO0C04642g	LAWA0G02102g	LACI0H09340g	LAFE0H05864g	LADA0C00562g	LAFA0G07624g	LAMI0H19086g	SAKL0H13310g	KLTH0F08118g
L.A1	A1LA01-097846g	1	+	449	449	LANO0G07580g	LAME0E03290g	ZYRO0C04664g	LAWA0G02080g	LACI0H09318g	LAFE0H05842g	LADA0C00540g	LAFA0G07602g	LAMI0H19108g	SAKL0H13288g	KLTH0F08096g
L.A1	A1LA01-097824g	1	-	450	450	LANO0G07558g	LAME0E03312g	ZYRO0C04686g	LAWA0G02058g	LACI0H09296g	LAFE0H05820g	LADA0C00518g	LAFA0G07580g	LAMI0H19130g	SAKL0H13266g	KLTH0F08074g
L.A1	A1LA01-097802g	1	+	451	451	LANO0G07536g	LAME0H02124g	ZYRO0C04708g	LAWA0G02036g	LACI0H09274g	LAFE0H05798g	LADA0C00496g	LAFA0G07558g	LAMI0H19174g	SAKL0H13244g	KLTH0F08052g
L.A1	A1LA01-097758g	1	+	452	452	LANO0G07404g	LAME0H02058g	ZYRO0C04730g	LAWA0G01992g	LACI0H09230g	LAFE0H05754g	LADA0C00430g	LAFA0G07492g	LAMI0H19218g	SAKL0H13200g	KLTH0F08008g
L.A1	A1LA01-097736g	1	+	453	453	LANO0G07360g	LAME0H02014g	ZYRO0A09284g	LAWA0G01948g	LACI0H09186g	LAFE0H05688g	LADA0C00386g	LAFA0G07448g	LAMI0H19284g	SAKL0H13090g	KLTH0F07942g
L.A1	A1LA01-097714g	1	+	454	454	LANO0G07338g	LAME0H01992g	ZYRO0A09306g	LAWA0G01926g	LACI0H09164g	LAFE0H05666g	LADA0C00364g	LAFA0G07426g	LAMI0H19306g	SAKL0H13068g	KLTH0F07920g
L.A1	A1LA01-097692g	1	+	455	455	LANO0G07316g	LAME0H01970g	ZYRO0A09328g	LAWA0G01904g	LACI0H09142g	LAFE0H05644g	LADA0C00342g	LAFA0G07404g	LAMI0H19328g	SAKL0H13046g	KLTH0F07876g
L.A1	A1LA01-097670g	1	+	456	456	LANO0G07294g	LAME0H01948g	ZYRO0A09350g	LAWA0G01882g	LACI0H09120g	LAFE0H05622g	LADA0C00320g	LAFA0G07360g	LAMI0H19350g	SAKL0H13024g	KLTH0F07854g
L.A1	A1LA01-097648g	1	+	457	457	LANO0G07272g	LAME0H01926g	ZYRO0A09372g		LACI0H09098g	LAFE0H05600g	LADA0C00298g	LAFA0G07338g	LAMI0B05798g	SAKL0H13002g	KLTH0F07832g
L.A1	A1LA01-097626g	1	-	458	458	LANO0G07250g	LAME0H01904g	ZYRO0A09394g	LAWA0G01838g	LACI0H09076g	LAFE0H05578g	LADA0C00276g	LAFA0G07316g	LAMI0B05776g	SAKL0H12980g	KLTH0F07810g
L.A1	A1LA01-097604g	1	+	459	459	LANO0E11430g	LAME0D09032g	ZYRO0A09416g		LACI0H09054g	LAFE0H05556g	LADA0D07184g	LAFA0F17700g	LAMI0B05754g	SAKL0H12958g	KLTH0E09922g
L.A1	A1LA01-097582g	1	-	460	460	LANO0E11408g	LAME0D09010g	ZYRO0A09438g		LACI0H09032g	LAFE0H05534g	LADA0D07162g	LAFA0F17722g	LAMI0B05732g	SAKL0H12936g	KLTH0E09944g
L.A1	A1LA01-097560g	1	+	461	461	LANO0E11386g	LAME0D08988g	ZYRO0A09460g	LAWA0D06744g	LACI0H09010g	LAFE0H05512g	LADA0D07140g	LAFA0F17744g	LAMI0B05710g	SAKL0H12914g	KLTH0E09966g
L.A1	A1LA01-097538g	1	-	462	462			ZYRO0A09482g							SAKL0H12892g
L.A1	A1LA01-097516g	1	-	463	463	LANO0E11364g	LAME0D08966g	ZYRO0A09504g	LAWA0D06766g	LACI0H08988g	LAFE0H05490g	LADA0D07118g	LAFA0F17766g	LAMI0B05688g	SAKL0H12870g	KLTH0E09988g
L.A1	A1LA01-097494g	1	-	464	464	LANO0E11342g	LAME0D08944g	ZYRO0A09526g	LAWA0D06788g	LACI0H08966g	LAFE0H05468g	LADA0D07096g	LAFA0F17788g	LAMI0B05666g	SAKL0H12848g	KLTH0E10010g
L.A1	A1LA01-097472g	1	+	465	465	LANO0E11320g	LAME0D08922g	ZYRO0A09548g	LAWA0F09538g	LACI0H08944g	LAFE0H05446g	LADA0D07074g	LAFA0F17810g	LAMI0B05644g	SAKL0H12826g	KLTH0E10054g
L.A1	A1LA01-097450g	1	+	466	466	LANO0E11298g		ZYRO0A09570g	LAWA0F09560g	LACI0H08922g	LAFE0H05424g			LAMI0B05622g	SAKL0H12804g	KLTH0E10076g
L.A1	A1LA01-097428g	1	+	467	467	LANO0E11276g	LAME0D08900g	ZYRO0A09614g	LAWA0F09582g	LACI0H08900g	LAFE0H05402g	LADA0D07052g	LAFA0F17832g	LAMI0B05600g	SAKL0H12782g	KLTH0E10098g
L.A1	A1LA01-097406g	1	+	468	468	LANO0E11254g	LAME0D08878g	ZYRO0A09636g	LAWA0F09604g	LACI0H08878g	LAFE0H05380g	LADA0D07030g	LAFA0F17854g	LAMI0B05578g	SAKL0H12760g	KLTH0E10120g
L.A1	A1LA01-097384g	1	+	469	469	LANO0E11232g	LAME0D08856g	ZYRO0A09658g	LAWA0F09626g	LACI0H08856g	LAFE0H05358g	LADA0D07008g	LAFA0F17876g	LAMI0B05556g	SAKL0H12738g	KLTH0E10142g
L.A1	A1LA01-097362g	1	-	470	470	LANO0E11210g	LAME0D08834g	ZYRO0A09680g	LAWA0F09648g	LACI0H08834g	LAFE0H05336g	LADA0D06986g	LAFA0F17898g	LAMI0B05534g	SAKL0H12716g	KLTH0E10164g
L.A1	A1LA01-097340g	1	-	471	471	LANO0E11188g	LAME0D08812g	ZYRO0A09702g	LAWA0F09670g	LACI0H08812g	LAFE0H05314g	LADA0D06964g	LAFA0F17920g	LAMI0B05512g	SAKL0H12694g	KLTH0E10186g
L.A1	A1LA01-097318g	1	+	472	472	LANO0E11166g	LAME0D08790g	ZYRO0A09724g	LAWA0F09692g	LACI0H08790g	LAFE0H05292g	LADA0D06942g	LAFA0F17942g	LAMI0B05490g	SAKL0H12672g	KLTH0E10208g
L.A1	A1LA01-097252g	1	-	473	473	LANO0E11078g	LAME0D08702g	ZYRO0A09834g	LAWA0F09802g	LACI0H08702g	LAFE0H05204g	LADA0D06854g	LAFA0F18030g	LAMI0B05402g	SAKL0H12584g	KLTH0E10318g
L.A1	A1LA01-097230g	1	+	474	474	LANO0E11056g	LAME0D08680g	ZYRO0A09856g	LAWA0F09824g	LACI0H08680g	LAFE0H05182g	LADA0D06832g	LAFA0F18052g	LAMI0B05380g	SAKL0H12562g	KLTH0E10340g
L.A1	A1LA01-097186g	1	+	475	475	LANO0E10968g	LAME0D08636g	ZYRO0A09878g	LAWA0F09868g	LACI0H08614g	LAFE0H05116g	LADA0D06810g	LAFA0F18096g	LAMI0B05358g	SAKL0H12518g	KLTH0E10406g
L.A1	A1LA01-097164g	1	-	476	476	LANO0E10946g	LAME0D08614g	ZYRO0A09922g	LAWA0F09890g	LACI0H08592g	LAFE0H05094g	LADA0D06788g	LAFA0F18118g	LAMI0B05336g	SAKL0H12496g	KLTH0E10428g
L.A1	A1LA01-097142g	1	-	477	477	LANO0E10924g	LAME0D08592g	ZYRO0A09944g	LAWA0F09912g	LACI0H08570g	LAFE0H05072g	LADA0D06766g	LAFA0F18140g	LAMI0B05314g	SAKL0H12474g	KLTH0E10450g
L.A1	A1LA01-097120g	1	+	478	478	LANO0E10902g	LAME0D08570g	ZYRO0A09966g	LAWA0F09934g	LACI0H08548g	LAFE0H05050g	LADA0D06744g	LAFA0F18162g	LAMI0B05292g	SAKL0H12452g	KLTH0E10472g
L.A1	A1LA01-097076g	1	-	479	479	LANO0E10880g	LAME0D08548g	ZYRO0A09988g	LAWA0F09956g	LACI0H08504g	LAFE0H05006g	LADA0D06722g	LAFA0F18184g	LAMI0B05248g	SAKL0H12408g	KLTH0E10494g
L.A1	A1LA01-097054g	1	+	480	480	LANO0E10858g	LAME0D08526g	ZYRO0A10010g	LAWA0F09978g	LACI0H08482g	LAFE0H04984g	LADA0D06700g	LAFA0F18206g	LAMI0B05226g	SAKL0H12386g	KLTH0E10516g
L.A1	A1LA01-097032g	1	+	481	481	LANO0E10836g	LAME0D08504g	ZYRO0A10032g	LAWA0F10000g	LACI0H08460g	LAFE0H04962g	LADA0D06678g	LAFA0F18228g	LAMI0B05204g	SAKL0H12364g	KLTH0E10538g
L.A1	A1LA01-097010g	1	-	482	482	LANO0E10814g	LAME0D08482g	ZYRO0A10054g	LAWA0F10022g	LACI0H08438g	LAFE0H04940g	LADA0D06656g	LAFA0F18250g	LAMI0B05182g	SAKL0H12342g	KLTH0E10560g
L.A1	A1LA01-096988g	1	+	483	483	LANO0E10792g	LAME0D08460g	ZYRO0A10076g	LAWA0F10044g	LACI0H08416g	LAFE0H04918g	LADA0D06634g	LAFA0F18272g	LAMI0B05160g	SAKL0H12320g	KLTH0E10582g
L.A1	A1LA01-096966g	1	+	484	484	LANO0E10770g	LAME0D08438g	ZYRO0A10098g	LAWA0F10066g	LACI0H08394g	LAFE0H04896g	LADA0D06612g	LAFA0F18294g	LAMI0B05138g	SAKL0H12298g	KLTH0E10604g
L.A1	A1LA01-096944g	1	+	485	485	LANO0E10748g	LAME0D08416g	ZYRO0A10120g	LAWA0F10088g	LACI0H08372g	LAFE0H04874g	LADA0D06590g	LAFA0F18316g	LAMI0B05116g	SAKL0H12276g	KLTH0E10626g
L.A1	A1LA01-096922g	1	-	486	486	LANO0E10726g	LAME0D08394g	ZYRO0A10142g	LAWA0F10110g	LACI0H08350g	LAFE0H04852g	LADA0D06568g		LAMI0B05094g	SAKL0H12254g	KLTH0E10648g
L.A1	A1LA01-096900g	1	-	487	487	LANO0E10704g	LAME0D08372g	ZYRO0A10164g	LAWA0F10132g	LACI0H08328g	LAFE0H04830g	LADA0D06546g	LAFA0F18338g	LAMI0B05072g	SAKL0H12188g	KLTH0E10670g
L.A1	A1LA01-096878g	1	-	488	488	LANO0E10682g	LAME0D08350g	ZYRO0A10186g	LAWA0F10154g	LACI0H08306g	LAFE0H04808g	LADA0D06524g	LAFA0F18360g	LAMI0B05050g	SAKL0H12166g	KLTH0E10692g
L.A1	A1LA01-096856g	1	+	489	489	LANO0E10660g	LAME0D08328g	ZYRO0A10208g	LAWA0F10176g	LACI0H08284g	LAFE0H04786g	LADA0D06502g	LAFA0F18382g	LAMI0B05028g	SAKL0H12144g	KLTH0E10714g
L.A1	A1LA01-096834g	1	-	490	490	LANO0E10638g	LAME0D08306g	ZYRO0F01474g	LAWA0F10198g	LACI0H08262g	LAFE0H04764g	LADA0D06480g	LAFA0F18404g	LAMI0B05006g	SAKL0H12122g	KLTH0E10736g
L.A1	A1LA01-096812g	1	-	491	491	LANO0E10616g	LAME0D08284g	ZYRO0F01452g	LAWA0F10220g	LACI0H08240g	LAFE0H04742g	LADA0D06348g	LAFA0F18426g	LAMI0B04786g	SAKL0H12100g	KLTH0E10758g
L.A1	A1LA01-096790g	1	-	492	492	LANO0E10594g	LAME0D08262g	ZYRO0F01430g	LAWA0F10242g	LACI0H08218g	LAFE0H04720g	LADA0D06326g	LAFA0F18448g	LAMI0B04808g	SAKL0H12078g	KLTH0E10780g
L.A1	A1LA01-096768g	1	-	493	493	LANO0E10572g	LAME0D08240g	ZYRO0F01408g	LAWA0F10264g	LACI0H08196g	LAFE0H04698g	LADA0D06304g	LAFA0F18470g	LAMI0B04830g	SAKL0H12056g	KLTH0E10802g
L.A1	A1LA01-096746g	1	+	494	494	LANO0E10550g	LAME0H09450g	ZYRO0A02970g	LAWA0F10308g	LACI0H08174g	LAFE0H04676g	LADA0D06282g	LAFA0E12178g	LAMI0H05204g	SAKL0H12012g	KLTH0E10868g
L.A1	A1LA01-096724g	1	-	495	495	LANO0E10528g	LAME0H09428g	ZYRO0A02948g	LAWA0F10330g	LACI0H08152g	LAFE0H04654g	LADA0D06260g	LAFA0E12156g	LAMI0H05182g	SAKL0H11968g	KLTH0E10890g
L.A1	A1LA01-096702g	1	+	496	496	LANO0E10506g	LAME0H09384g	ZYRO0A02926g	LAWA0F10352g	LACI0H08130g	LAFE0H04632g	LADA0D06238g	LAFA0E12090g	LAMI0H05160g	SAKL0H11946g	KLTH0E10934g
L.A1	A1LA01-096680g	1	+	497	497	LANO0E10484g	LAME0H09362g	ZYRO0A02904g	LAWA0F10374g	LACI0H08108g	LAFE0H04610g	LADA0D06216g	LAFA0E12068g	LAMI0H05138g	SAKL0H11924g	KLTH0E10956g
L.A1	A1LA01-096658g	1	+	498	498	LANO0E10462g	LAME0H09340g	ZYRO0A02882g	LAWA0F10396g	LACI0H08086g	LAFE0H04588g	LADA0D06194g	LAFA0E12046g	LAMI0H05116g	SAKL0H11880g	KLTH0E10978g
L.A1	A1LA01-096636g	1	-	499	499	LANO0E10440g	LAME0H09318g	ZYRO0A02860g	LAWA0F10418g	LACI0H08064g	LAFE0H04566g	LADA0D06172g	LAFA0E12024g	LAMI0H05094g	SAKL0H11858g	KLTH0E11000g
L.A1	A1LA01-096614g	1	+	500	500	LANO0E10418g	LAME0H09296g	ZYRO0A02838g	LAWA0F10440g	LACI0H08042g	LAFE0H04544g	LADA0D06150g	LAFA0E12002g	LAMI0H05072g	SAKL0H11836g	KLTH0E11022g
L.A1	A1LA01-096592g	1	-	501	501	LANO0E10396g	LAME0H09274g	ZYRO0A02816g	LAWA0F10462g	LACI0H08020g	LAFE0H04522g	LADA0D06128g	LAFA0E11980g	LAMI0H05050g	SAKL0H11814g	KLTH0E11044g
L.A1	A1LA01-096570g	1	+	502	502	LANO0E10374g	LAME0H09252g	ZYRO0A02794g	LAWA0F10484g	LACI0H07998g	LAFE0H04500g	LADA0D06106g	LAFA0E11958g	LAMI0H05028g	SAKL0H11792g	KLTH0E11066g
L.A1	A1LA01-096526g	1	+	503	503	LANO0E10330g	LAME0H09208g	ZYRO0A02772g	LAWA0F10528g	LACI0H07954g	LAFE0H04456g	LADA0D06062g	LAFA0E11914g		SAKL0H11748g	KLTH0E11110g
L.A1	A1LA01-096504g	1	-	504	504	LANO0E10308g	LAME0H09186g	ZYRO0A02750g	LAWA0F10550g	LACI0H07932g	LAFE0H04434g	LADA0D06040g	LAFA0E11892g	LAMI0H02366g	SAKL0H11726g	KLTH0E11132g
L.A1	A1LA01-096482g	1	-	505	505	LANO0E10286g	LAME0H09164g	ZYRO0A02728g	LAWA0F10572g	LACI0H07910g	LAFE0H04412g	LADA0D06018g	LAFA0E11870g	LAMI0H02344g	SAKL0H11704g	KLTH0E11154g
L.A1	A1LA01-096460g	1	-	506	506	LANO0E10264g	LAME0H09142g	ZYRO0A02706g	LAWA0F10594g	LACI0G10704g	LAFE0G12574g	LADA0D05996g	LAFA0E11848g	LAMI0H02322g	SAKL0H11682g	KLTH0E11308g
L.A1	A1LA01-096438g	1	-	507	507	LANO0E10242g	LAME0H09120g	ZYRO0F08052g	LAWA0F10616g	LACI0G10726g	LAFE0G12596g	LADA0D05974g	LAFA0E11826g	LAMI0H02300g	SAKL0H11660g	KLTH0E11198g
L.A1	A1LA01-096416g	1	+	508	508	LANO0E10220g	LAME0H09098g	ZYRO0F08074g	LAWA0F10682g	LACI0G10748g	LAFE0G12618g	LADA0D05952g	LAFA0E11804g	LAMI0H02278g	SAKL0H11638g	KLTH0E11220g
L.A1	A1LA01-096394g	1	-	509	509	LANO0E10198g	LAME0H09076g	ZYRO0F08096g	LAWA0F10704g	LACI0G10770g	LAFE0G12640g	LADA0D05930g	LAFA0E11782g	LAMI0H02256g	SAKL0H11616g	KLTH0E11242g
L.A1	A1LA01-096372g	1	+	510	510	LANO0E10176g	LAME0H09054g	ZYRO0F08118g	LAWA0F10726g	LACI0G10792g	LAFE0G12662g	LADA0D05908g	LAFA0E11760g	LAMI0H02234g	SAKL0H11594g	KLTH0E11264g
L.A1	A1LA01-096306g	1	+	511	511	LANO0E10154g	LAME0H09032g	ZYRO0F08140g	LAWA0F10770g	LACI0G10814g	LAFE0G12684g	LADA0D05886g	LAFA0E11738g	LAMI0H02190g	SAKL0H11462g	KLTH0E11308g
L.A1	A1LA01-096284g	1	-	512	512	LANO0E10132g	LAME0H09010g	ZYRO0F08162g	LAWA0F10792g	LACI0G10836g	LAFE0G12706g	LADA0D05864g	LAFA0E11716g	LAMI0H02168g	SAKL0H11440g	KLTH0E11330g
L.A1	A1LA01-096262g	1	-	513	513			ZYRO0F08184g		LACI0G10858g	LAFE0G12728g				SAKL0H11418g	KLTH0E11308g
L.A1	A1LA01-096240g	1	+	514	514	LANO0E10110g	LAME0H08988g	ZYRO0F08206g	LAWA0F10814g	LACI0G10880g	LAFE0G12750g	LADA0D05842g	LAFA0E11694g	LAMI0H02146g	SAKL0H11396g	KLTH0E11352g
L.A1	A1LA01-096218g	1	+	515	515	LANO0E10088g	LAME0H08966g	ZYRO0F08250g	LAWA0F10836g	LACI0G10902g	LAFE0G12772g	LADA0D05820g	LAFA0E11672g	LAMI0H02124g	SAKL0H11374g	KLTH0E11374g
L.A1	A1LA01-096196g	1	+	516	516	LANO0E10066g	LAME0H08944g	ZYRO0F08272g	LAWA0F10858g	LACI0G10924g	LAFE0G12794g	LADA0D05798g	LAFA0E11650g	LAMI0A01486g	SAKL0H11352g	KLTH0E11396g
L.A1	A1LA01-096174g	1	-	517	517	LANO0E10044g	LAME0H08922g	ZYRO0F08294g	LAWA0F10880g	LACI0G10946g	LAFE0G12816g	LADA0D05776g	LAFA0E11628g	LAMI0A01464g	SAKL0H11330g	KLTH0E11418g
L.A1	A1LA01-096152g	1	+	518	518		LAME0H08900g	ZYRO0F08316g	LAWA0F10902g	LACI0G10968g	LAFE0G12838g	LADA0D05820g	LAFA0E11606g		SAKL0H11308g	KLTH0E11440g
L.A1	A1LA01-096130g	1	-	519	519	LANO0E10022g	LAME0H08878g	ZYRO0F08338g	LAWA0F10913g	LACI0G10990g	LAFE0G12860g	LADA0D05754g	LAFA0E11584g	LAMI0A01442g	SAKL0H11286g	KLTH0E11462g
L.A1	A1LA01-096108g	1	+	520	520	LANO0E10000g	LAME0H08856g	ZYRO0F08360g	LAWA0F10924g	LACI0G11012g	LAFE0G12882g	LADA0D05732g	LAFA0E11562g	LAMI0A01420g	SAKL0H11264g	KLTH0E11484g
L.A1	A1LA01-096086g	1	-	521	521	LANO0E09978g	LAME0H08834g	ZYRO0F08382g	LAWA0F10946g	LACI0G11034g	LAFE0G12904g	LADA0D05710g	LAFA0E11540g	LAMI0A01398g	SAKL0H11242g	KLTH0E11506g
L.A1	A1LA01-096064g	1	-	522	522	LANO0E09956g	LAME0H08812g	ZYRO0F08404g	LAWA0F10968g	LACI0G11056g	LAFE0G12926g	LADA0D05688g	LAFA0E11518g	LAMI0A01376g	SAKL0H11220g	KLTH0E11528g
L.A1	A1LA01-096042g	1	-	523	523	LANO0E09934g	LAME0H08790g	ZYRO0F08426g	LAWA0F10990g	LACI0G11078g	LAFE0G12948g	LADA0D05666g	LAFA0E11496g	LAMI0A01354g	SAKL0H11198g	KLTH0E11550g
L.A1	A1LA01-095998g	1	-	524	524	LANO0E09890g	LAME0H08768g	ZYRO0F08448g	LAWA0F11012g	LACI0G11122g	LAFE0G12992g	LADA0D05622g	LAFA0E11474g	LAMI0A01310g	SAKL0H11154g	KLTH0E11572g
L.A1	A1LA01-095976g	1	+	525	525	LANO0E09846g	LAME0H08746g	ZYRO0F08470g	LAWA0F11034g	LACI0G11144g	LAFE0G13014g	LADA0D05600g	LAFA0E11452g	LAMI0A01288g	SAKL0H11132g	KLTH0E11594g
L.A1	A1LA01-095954g	1	+	526	526	LANO0E09824g	LAME0H08724g	ZYRO0F08492g	LAWA0F11056g	LACI0G11166g	LAFE0G13036g	LADA0D05578g	LAFA0E11430g	LAMI0E12354g	SAKL0H11110g	KLTH0E11616g
L.A1	A1LA01-095932g	1	-	527	527	LANO0E09802g	LAME0H08702g	ZYRO0F08514g	LAWA0F11078g	LACI0G11188g	LAFE0G13058g	LADA0D05556g	LAFA0E11408g	LAMI0E12332g	SAKL0H11088g	KLTH0E11638g
L.A1	A1LA01-095910g	1	-	528	528	LANO0E09780g	LAME0H08680g	ZYRO0F08536g	LAWA0F11100g	LACI0G11210g	LAFE0G13080g	LADA0D05534g	LAFA0E11386g	LAMI0E12310g	SAKL0H11066g	KLTH0E11660g
L.A1	A1LA01-095888g	1	-	529	529	LANO0E09758g	LAME0H08658g	ZYRO0F08558g	LAWA0F11122g	LACI0G11232g	LAFE0G13102g	LADA0D05512g	LAFA0E11364g	LAMI0E12288g	SAKL0H11044g	KLTH0E11682g
L.A1	A1LA01-095866g	1	-	530	530			ZYRO0F08580g	LAWA0F11144g	LACI0G11254g	LAFE0G13124g	LADA0D05490g		LAMI0E12266g	SAKL0H11022g	KLTH0E11704g
L.A1	A1LA01-095822g	1	+	531	531	LANO0E09714g	LAME0H08614g	ZYRO0F08602g	LAWA0F11166g	LACI0G11320g	LAFE0G13190g	LADA0D05468g	LAFA0E11320g	LAMI0H07448g	SAKL0H10956g	KLTH0E11726g
L.A1	A1LA01-095800g	1	+	532	532	LANO0E09692g	LAME0H08592g	ZYRO0F08624g	LAWA0F11188g	LACI0G11342g	LAFE0G13212g	LADA0D05446g	LAFA0E11298g	LAMI0H07426g	SAKL0H10934g	KLTH0E11748g
L.A1	A1LA01-095778g	1	-	533	533	LANO0E09670g	LAME0H08570g	ZYRO0F08646g	LAWA0F11210g	LACI0G11364g	LAFE0G13234g	LADA0D05424g	LAFA0E11276g	LAMI0H07404g	SAKL0H10912g	KLTH0E11770g
L.A1	A1LA01-095712g	1	-	534	534	LANO0E09604g	LAME0H08504g	ZYRO0F08690g		LACI0G11430g	LAFE0G13300g	LADA0D05358g	LAFA0E11232g	LAMI0H07338g	SAKL0H10846g	KLTH0E11836g
L.A1	A1LA01-095690g	1	+	535	535	LANO0E09582g	LAME0H08482g	ZYRO0F08712g		LACI0G11452g	LAFE0G13322g	LADA0D05336g	LAFA0E11210g	LAMI0H07294g	SAKL0H10824g	KLTH0E11858g
L.A1	A1LA01-095668g	1	+	536	536	LANO0E09560g	LAME0H08460g	ZYRO0F08734g	LAWA0F11254g	LACI0G11474g	LAFE0G13344g	LADA0D05314g	LAFA0E11188g	LAMI0H07272g	SAKL0H10802g	KLTH0E11880g
L.A1	A1LA01-095646g	1	+	537	537	LANO0E09538g	LAME0H08438g	ZYRO0F08756g		LACI0G11496g	LAFE0G13366g	LADA0D05292g	LAFA0E11166g	LAMI0H07250g	SAKL0H10780g	KLTH0E11902g
L.A1	A1LA01-095624g	1	+	538	538	LANO0E09516g	LAME0H08416g	ZYRO0F08778g		LACI0G11518g	LAFE0G13388g	LADA0D05270g	LAFA0E11144g	LAMI0H07228g	SAKL0H10758g	KLTH0E11924g
L.A1	A1LA01-095602g	1	+	539	539	LANO0E09472g	LAME0H08372g	ZYRO0F08800g	LAWA0F11320g	LACI0G11540g	LAFE0G13410g	LADA0D05226g	LAFA0E11100g	LAMI0H07184g	SAKL0H10736g	KLTH0E11946g
L.A1	A1LA01-095580g	1	-	540	540	LANO0E09450g	LAME0H08350g	ZYRO0F08844g	LAWA0F11342g	LACI0G11562g	LAFE0G13432g	LADA0D05204g	LAFA0E11078g	LAMI0E06590g	SAKL0H10692g	KLTH0E11968g
L.A1	A1LA01-095536g	1	+	541	541			ZYRO0F08866g		LACI0G11606g	LAFE0G13476g			LAMI0E06656g	SAKL0H10670g
L.A1	A1LA01-095514g	1	+	542	542	LANO0E09406g	LAME0H08306g	ZYRO0F08910g	LAWA0F11386g	LACI0G11628g	LAFE0G13498g	LADA0D05138g	LAFA0E11034g	LAMI0E06678g	SAKL0H10648g	KLTH0E12012g
L.A1	A1LA01-095492g	1	-	543	543	LANO0E09384g	LAME0H08284g	ZYRO0F08932g	LAWA0F11408g	LACI0G11650g	LAFE0G13520g	LADA0D05116g	LAFA0E11012g	LAMI0E06700g	SAKL0H10626g	KLTH0E12034g
L.A1	A1LA01-095470g	1	+	544	544	LANO0E09362g	LAME0H08262g	ZYRO0F08976g	LAWA0F11452g	LACI0G11672g	LAFE0G13542g	LADA0D05094g	LAFA0E10990g	LAMI0E06722g	SAKL0H10560g	KLTH0E12078g
L.A1	A1LA01-095448g	1	-	545	545	LANO0E09340g	LAME0H08240g	ZYRO0F08998g	LAWA0F11474g	LACI0G11694g	LAFE0G13564g	LADA0D05072g	LAFA0E10968g	LAMI0E06744g	SAKL0H10538g	KLTH0E12100g
L.A1	A1LA01-095426g	1	-	546	546	LANO0E09318g	LAME0H08218g	ZYRO0F09020g	LAWA0F11496g	LACI0G11716g	LAFE0G13586g	LADA0D05050g	LAFA0E10946g	LAMI0E06766g	SAKL0H10516g	KLTH0E12122g
L.A1	A1LA01-095404g	1	-	547	547	LANO0E09296g	LAME0H08196g	ZYRO0F09042g	LAWA0F11518g	LACI0G11738g	LAFE0G13608g	LADA0D05028g	LAFA0E10924g	LAMI0E06788g	SAKL0H10494g	KLTH0E12144g
L.A1	A1LA01-095360g	1	+	548	548	LANO0E09252g	LAME0H08152g	ZYRO0F09064g	LAWA0F11562g	LACI0G11782g	LAFE0G13652g	LADA0D04984g	LAFA0E10880g	LAMI0E06832g	SAKL0H10450g	KLTH0E12188g
L.A1	A1LA01-095206g	1	-	549	549	LANO0E09208g	LAME0H08108g	ZYRO0F09108g	LAWA0F11606g	LACI0G11826g	LAFE0G13718g	LADA0D04940g	LAFA0E10836g	LAMI0E06876g	SAKL0H10274g	KLTH0E12232g
L.A1	A1LA01-095228g	1	-	550	550	LANO0E09186g	LAME0H08086g	ZYRO0F09130g	LAWA0F11628g	LACI0G11848g	LAFE0G13740g	LADA0D04918g	LAFA0E10814g	LAMI0E06898g	SAKL0H10296g	KLTH0E12254g
L.A1	A1LA01-095250g	1	+	551	551	LANO0E09164g	LAME0H08064g	ZYRO0F09152g	LAWA0F11650g	LACI0G11870g	LAFE0G13762g	LADA0D04896g	LAFA0E10792g		SAKL0H10318g	KLTH0E12276g
L.A1	A1LA01-095272g	1	-	552	552			ZYRO0F09174g							SAKL0H10340g
L.A1	A1LA01-095294g	1	-	553	553	LANO0E09142g	LAME0H08042g	ZYRO0F09196g		LACI0G11892g	LAFE0G13784g	LADA0D04874g	LAFA0E10770g	LAMI0E06920g	SAKL0H10362g	KLTH0E12298g
L.A1	A1LA01-095316g	1	-	554	554	LANO0E09120g	LAME0H08020g	ZYRO0F09218g	LAWA0F11694g	LACI0G11914g	LAFE0G13806g	LADA0D04852g	LAFA0E10748g	LAMI0E06942g	SAKL0H10384g	KLTH0E12320g
L.A1	A1LA01-095338g	1	-	555	555	LANO0E09098g	LAME0H07998g	ZYRO0F09240g	LAWA0F11716g	LACI0G11936g	LAFE0G13828g	LADA0D04830g	LAFA0E10726g	LAMI0E06964g	SAKL0H10406g	KLTH0E12342g
L.A1	A1LA01-095162g	1	+	556	556	LANO0E09076g	LAME0H07976g	ZYRO0D04114g	LAWA0F11738g	LACI0G11980g	LAFE0G13850g	LADA0D04808g	LAFA0E10704g	LAMI0E06986g	SAKL0H10230g	KLTH0E12364g
L.A1	A1LA01-095118g	1	-	557	557	LANO0E09032g	LAME0H07932g	ZYRO0D04092g		LACI0G12024g	LAFE0G13894g	LADA0D04764g	LAFA0E10660g	LAMI0E07030g	SAKL0H10186g	KLTH0E12408g
L.A1	A1LA01-095096g	1	+	558	558	LANO0E09010g	LAME0H07910g	ZYRO0D04070g		LACI0G12046g	LAFE0G13916g	LADA0D04742g	LAFA0E10638g	LAMI0E07052g	SAKL0H10164g	KLTH0E12430g
L.A1	A1LA01-095074g	1	-	559	559	LANO0E08988g	LAME0H07888g	ZYRO0D04048g	LAWA0F11804g	LACI0G12068g	LAFE0G13938g	LADA0D04720g	LAFA0E10616g	LAMI0E07074g	SAKL0H10142g	KLTH0E12452g
L.A1	A1LA01-095052g	1	+	560	560	LANO0E08966g	LAME0H07866g	ZYRO0D04026g	LAWA0F11826g	LACI0G12090g	LAFE0G13960g	LADA0D04698g	LAFA0E10594g	LAMI0E07096g	SAKL0H10120g	KLTH0E12474g
L.A1	A1LA01-095030g	1	-	561	561	LANO0E08944g	LAME0H07844g	ZYRO0D04004g	LAWA0F11870g	LACI0G12112g	LAFE0G13982g	LADA0D04676g	LAFA0E10572g	LAMI0E07118g	SAKL0H10098g	KLTH0E12518g
L.A1	A1LA01-095008g	1	-	562	562	LANO0E08922g	LAME0H07822g	ZYRO0D03982g	LAWA0F11892g	LACI0G12134g		LADA0D04654g	LAFA0E10550g	LAMI0E07140g	SAKL0H10076g	KLTH0E12540g
L.A1	A1LA01-094986g	1	-	563	563			ZYRO0D03960g		LACI0G12156g	LAFE0G14026g				SAKL0H10054g
L.A1	A1LA01-094964g	1	-	564	564	LANO0E08900g	LAME0H07800g	ZYRO0D03938g	LAWA0F11914g	LACI0G12178g	LAFE0G14048g	LADA0D04632g	LAFA0E10528g	LAMI0E07162g	SAKL0H10032g	KLTH0E12562g
L.A1	A1LA01-094942g	1	-	565	565	LANO0E08878g	LAME0H07778g	ZYRO0D03916g	LAWA0F11936g	LACI0G12200g	LAFE0G14070g	LADA0D04610g	LAFA0E10506g	LAMI0E07184g	SAKL0H10010g	KLTH0E12584g
L.A1	A1LA01-094920g	1	+	566	566	LANO0E08856g	LAME0H07756g	ZYRO0A12980g	LAWA0F11958g	LACI0G12222g	LAFE0G14092g	LADA0D04588g	LAFA0E10462g	LAMI0E07206g	SAKL0H09988g	KLTH0E12606g
L.A1	A1LA01-094898g	1	-	567	567	LANO0E08834g	LAME0H07734g	ZYRO0A13002g	LAWA0F11980g	LACI0G12244g	LAFE0G14114g	LADA0D04566g	LAFA0E10440g	LAMI0E07228g	SAKL0H09966g	KLTH0E12628g
L.A1	A1LA01-094854g	1	+	568	568	LANO0E08768g	LAME0H07690g	ZYRO0A13046g	LAWA0F12024g	LACI0G12288g	LAFE0G14158g	LADA0D04522g	LAFA0E10396g	LAMI0E07272g	SAKL0H09922g	KLTH0E12672g
L.A1	A1LA01-094832g	1	+	569	569	LANO0E08746g	LAME0H07668g	ZYRO0A13068g	LAWA0F12046g	LACI0G12310g	LAFE0G14180g	LADA0D04500g	LAFA0E10374g	LAMI0E07294g	SAKL0H09900g	KLTH0E12694g
L.A1	A1LA01-094810g	1	+	570	570	LANO0E08724g	LAME0H07646g	ZYRO0A13090g	LAWA0F12068g	LACI0G12332g	LAFE0G14202g	LADA0D04478g	LAFA0E10352g	LAMI0E07316g	SAKL0H09878g	KLTH0E12716g
L.A1	A1LA01-094788g	1	-	571	571			ZYRO0A13112g	LAWA0F12090g	LACI0G12354g				LAMI0E07338g	SAKL0H09856g	KLTH0E12738g
L.A1	A1LA01-094766g	1	+	572	572	LANO0E08702g	LAME0H07624g	ZYRO0A13134g	LAWA0F12112g	LACI0G12376g	LAFE0G14246g	LADA0D04456g	LAFA0E10330g	LAMI0E07360g	SAKL0H09834g	KLTH0E12760g
L.A1	A1LA01-094744g	1	-	573	573	LANO0E08680g	LAME0H07602g	ZYRO0A13156g	LAWA0F12134g	LACI0G12398g	LAFE0G14268g	LADA0D04434g	LAFA0E10308g	LAMI0E07382g	SAKL0H09812g	KLTH0E12782g
L.A1	A1LA01-094722g	1	-	574	574	LANO0E08658g	LAME0H07580g	ZYRO0A13178g	LAWA0F12156g	LACI0G12420g	LAFE0G14290g	LADA0D04412g	LAFA0E10286g	LAMI0E07404g	SAKL0H09790g	KLTH0E12804g
L.A1	A1LA01-094700g	1	-	575	575	LANO0E08636g	LAME0H07558g	ZYRO0A13200g	LAWA0F12178g	LACI0G12442g	LAFE0G14312g	LADA0D04390g	LAFA0E10264g	LAMI0E07426g	SAKL0H09768g	KLTH0E12826g
L.A1	A1LA01-094678g	1	-	576	576	LANO0E08614g	LAME0H07536g	ZYRO0A13222g	LAWA0F12200g	LACI0G12464g	LAFE0G14334g	LADA0D04368g	LAFA0E10242g	LAMI0E07448g	SAKL0H09746g	KLTH0E12848g
L.A1	A1LA01-094656g	1	+	577	577	LANO0E08592g	LAME0H07514g	ZYRO0A13244g	LAWA0F12090g	LACI0G12486g	LAFE0G14356g	LADA0D04346g	LAFA0E10220g	LAMI0E07338g	SAKL0H09724g	KLTH0E12870g
L.A1	A1LA01-094612g	1	-	578	578	LANO0E08548g	LAME0H07470g	ZYRO0A13288g	LAWA0F12266g	LACI0G12530g	LAFE0G14400g	LADA0D04302g	LAFA0E10176g	LAMI0E07492g	SAKL0H09680g	KLTH0E12914g
L.A1	A1LA01-094590g	1	-	579	579	LANO0E08526g	LAME0H07448g	ZYRO0A13310g	LAWA0F12288g	LACI0G12552g	LAFE0G14422g	LADA0D04280g	LAFA0E10154g	LAMI0E07514g	SAKL0H09658g	KLTH0E12936g
L.A1	A1LA01-094568g	1	+	580	580	LANO0E08482g	LAME0H07404g	ZYRO0A13332g	LAWA0F12354g	LACI0G12596g	LAFE0G14466g	LADA0D04236g	LAFA0E10110g	LAMI0E07558g	SAKL0H09636g	KLTH0E12980g
L.A1	A1LA01-094546g	1	-	581	581	LANO0E08460g	LAME0H07382g	ZYRO0A13354g	LAWA0F12365g	LACI0G12618g	LAFE0G14488g	LADA0D04214g	LAFA0E10088g	LAMI0E07580g	SAKL0H09614g	KLTH0E13002g
L.A1	A1LA01-094524g	1	+	582	582	LANO0E08438g	LAME0H07360g	ZYRO0A13376g	LAWA0F12376g	LACI0G12640g	LAFE0G14510g	LADA0D04192g	LAFA0E10066g	LAMI0E07602g	SAKL0H09592g	KLTH0E13024g
L.A1	A1LA01-094502g	1	-	583	583	LANO0E08416g	LAME0H07338g	ZYRO0A13398g	LAWA0F12398g	LACI0G12662g	LAFE0G14532g	LADA0D04170g	LAFA0E10044g	LAMI0E07624g	SAKL0H09570g	KLTH0E13046g
L.A1	A1LA01-094480g	1	+	584	584	LANO0E08394g	LAME0H07316g	ZYRO0A13420g	LAWA0F12420g	LACI0G12684g	LAFE0G14554g	LADA0D04148g	LAFA0E10022g	LAMI0E07646g	SAKL0H09548g	KLTH0E13068g
L.A1	A1LA01-094436g	1	-	585	585	LANO0E08350g	LAME0H07272g	ZYRO0A13442g	LAWA0F12442g	LACI0G12728g	LAFE0G14598g	LADA0D04104g	LAFA0E09978g	LAMI0E07690g	SAKL0H09482g	KLTH0E13112g
L.A1	A1LA01-094392g	1	+	586	586	LANO0E08284g	LAME0H07228g	ZYRO0A13464g		LACI0G12772g	LAFE0G14642g	LADA0D04060g	LAFA0E09956g	LAMI0E07756g	SAKL0H09416g	KLTH0E13156g
L.A1	A1LA01-094370g	1	+	587	587	LANO0E08262g	LAME0H07206g	ZYRO0F14586g		LACI0G12794g	LAFE0G14664g	LADA0D04038g	LAFA0E09934g	LAMI0E07778g	SAKL0H09394g	KLTH0E13178g
L.A1	A1LA01-094348g	1	-	588	588	LANO0E08240g	LAME0H07184g	ZYRO0F14608g		LACI0G12816g	LAFE0G14686g	LADA0D04016g	LAFA0E09912g	LAMI0E07800g	SAKL0H09372g	KLTH0E13200g
L.A1	A1LA01-094326g	1	-	589	589	LANO0E08218g	LAME0H07162g	ZYRO0F14630g		LACI0G12838g	LAFE0G14708g	LADA0D03994g	LAFA0E09890g		SAKL0H09350g
L.A1	A1LA01-094304g	1	-	590	590	LANO0E08196g	LAME0H07140g	ZYRO0F14652g	LAWA0F12530g	LACI0G12860g	LAFE0G14752g	LADA0D03972g	LAFA0E09868g	LAMI0E07822g	SAKL0H09328g	KLTH0E13222g
L.A1	A1LA01-094282g	1	-	591	591	LANO0E08174g	LAME0H07118g	ZYRO0F14674g	LAWA0F12552g	LACI0G12882g	LAFE0G14774g	LADA0D03950g	LAFA0E09846g	LAMI0E07844g	SAKL0H09306g	KLTH0E13244g
L.A1	A1LA01-094260g	1	+	592	592	LANO0E08152g	LAME0H07096g	ZYRO0F14696g	LAWA0F12574g	LACI0G12904g	LAFE0G14796g	LADA0D03928g	LAFA0E09824g	LAMI0E07866g	SAKL0H09284g	KLTH0E13266g
L.A1	A1LA01-094238g	1	+	593	593	LANO0E08130g	LAME0H07074g	ZYRO0F14718g	LAWA0F12596g	LACI0G12926g	LAFE0G14818g	LADA0D03906g	LAFA0E09802g	LAMI0E07888g	SAKL0H09262g	KLTH0E13288g
L.A1	A1LA01-094216g	1	+	594	594	LANO0E08108g	LAME0H07052g	ZYRO0F14740g	LAWA0F12618g	LACI0G12948g	LAFE0G14840g	LADA0D03884g	LAFA0E09780g	LAMI0E07910g	SAKL0H09240g	KLTH0E13310g
L.A1	A1LA01-094194g	1	-	595	595	LANO0E08086g	LAME0H07030g	ZYRO0F14762g	LAWA0F12640g	LACI0G12970g	LAFE0G14862g	LADA0D03862g	LAFA0E09758g	LAMI0E07932g	SAKL0H09218g	KLTH0E13332g
L.A1	A1LA01-094150g	1	-	596	596	LANO0E08042g	LAME0H06986g	ZYRO0F14784g	LAWA0F12684g	LACI0G13014g	LAFE0G14906g	LADA0D03818g	LAFA0E09714g	LAMI0E07976g	SAKL0H09196g	KLTH0E13354g
L.A1	A1LA01-094128g	1	+	597	597	LANO0E08020g	LAME0H06964g	ZYRO0F14806g	LAWA0F12706g	LACI0G13036g	LAFE0G14928g	LADA0D03796g	LAFA0E09692g	LAMI0E07998g	SAKL0H09174g	KLTH0E13376g
L.A1	A1LA01-094106g	1	+	598	598	LANO0E07998g	LAME0H06942g	ZYRO0F14828g	LAWA0F12728g	LACI0G13058g	LAFE0G14950g	LADA0D03774g	LAFA0E09670g	LAMI0E08020g	SAKL0H09152g	KLTH0E13398g
L.A1	A1LA01-094084g	1	-	599	599	LANO0E07976g	LAME0H06920g	ZYRO0F14850g	LAWA0F12750g	LACI0G13080g	LAFE0G14972g	LADA0D03752g	LAFA0E09648g	LAMI0E08042g	SAKL0H09130g	KLTH0E13420g
L.A1	A1LA01-094062g	1	-	600	600	LANO0E07954g	LAME0H06898g	ZYRO0F14872g	LAWA0F12772g	LACI0G13102g	LAFE0G14994g	LADA0D03730g	LAFA0E09626g	LAMI0E08064g	SAKL0H09108g	KLTH0E13442g
L.A1	A1LA01-094040g	1	+	601	601	LANO0E07932g	LAME0H06876g	ZYRO0F14894g	LAWA0F12794g	LACI0G13124g	LAFE0G15016g	LADA0D03708g	LAFA0E09604g	LAMI0E08086g	SAKL0H09086g	KLTH0E13464g
L.A1	A1LA01-094018g	1	-	602	602	LANO0E07910g	LAME0H06854g	ZYRO0F14916g	LAWA0F12816g	LACI0G13146g	LAFE0G15038g	LADA0D03686g	LAFA0E09582g	LAMI0E08108g	SAKL0H09064g	KLTH0E13486g
L.A1	A1LA01-093952g	1	-	603	603	LANO0E07866g	LAME0D09076g	ZYRO0F14938g	LAWA0F12860g	LACI0G13234g	LAFE0G15104g	LADA0D03642g	LAFA0F17656g	LAMI0E08020g	SAKL0H08954g	KLTH0E13530g
L.A1	A1LA01-093930g	1	-	604	604	LANO0E07844g	LAME0D09098g	ZYRO0F14960g	LAWA0F12882g	LACI0G13256g	LAFE0G15126g	LADA0D03620g	LAFA0F17634g	LAMI0E08174g	SAKL0H08932g	KLTH0E13552g
L.A1	A1LA01-093908g	1	+	605	605	LANO0E07822g	LAME0D09120g	ZYRO0F14982g	LAWA0F12904g	LACI0G13278g	LAFE0G15148g	LADA0D03598g	LAFA0F17612g	LAMI0E08196g	SAKL0H08910g	KLTH0E13574g
L.A1	A1LA01-093886g	1	+	606	606	LANO0E07800g	LAME0D09142g	ZYRO0F15004g	LAWA0F12926g	LACI0G13300g	LAFE0G15170g	LADA0D03576g	LAFA0F17590g	LAMI0E08218g	SAKL0H08888g	KLTH0E13596g
L.A1	A1LA01-093864g	1	-	607	607	LANO0E07778g	LAME0D09164g	ZYRO0F15026g	LAWA0F12948g	LACI0G13322g	LAFE0G15192g	LADA0D03554g	LAFA0F17568g	LAMI0E08240g	SAKL0H08866g	KLTH0E13618g
L.A1	A1LA01-093842g	1	+	608	608	LANO0E07756g	LAME0D09208g	ZYRO0F15048g	LAWA0F12970g	LACI0G13344g	LAFE0G15214g	LADA0D03532g	LAFA0F17524g	LAMI0E08262g	SAKL0H08844g	KLTH0E13640g
L.A1	A1LA01-093820g	1	+	609	609	LANO0E07734g	LAME0D09230g	ZYRO0A10516g	LAWA0F12992g	LACI0G13366g	LAFE0G15236g	LADA0D03510g	LAFA0F17502g	LAMI0E08284g	SAKL0H08822g	KLTH0E13662g
L.A1	A1LA01-093798g	1	-	610	610	LANO0E07712g	LAME0D09252g	ZYRO0A10494g	LAWA0F13014g	LACI0G13388g	LAFE0G15258g	LADA0D03488g	LAFA0F17480g	LAMI0E08306g	SAKL0H08778g	KLTH0E13684g
L.A1	A1LA01-093776g	1	-	611	611	LANO0E07690g	LAME0D09274g	ZYRO0A10472g	LAWA0F13036g	LACI0G13410g	LAFE0G15280g	LADA0D03466g	LAFA0F17458g	LAMI0E08328g	SAKL0H08756g	KLTH0E13706g
L.A1	A1LA01-093754g	1	+	612	612	LANO0E07668g	LAME0D09296g	ZYRO0A10450g	LAWA0F13058g	LACI0G13432g	LAFE0G15302g	LADA0D03444g	LAFA0F17436g	LAMI0E08350g	SAKL0H08734g	KLTH0E13728g
L.A1	A1LA01-093732g	1	-	613	613	LANO0E07646g	LAME0D09318g	ZYRO0A10428g	LAWA0F13080g	LACI0G13454g	LAFE0G15324g	LADA0D03422g	LAFA0F17414g	LAMI0E08372g	SAKL0H08712g	KLTH0E13750g
L.A1	A1LA01-093710g	1	-	614	614	LANO0E07624g	LAME0D09340g	ZYRO0A10406g	LAWA0F13102g	LACI0G13476g	LAFE0G15346g	LADA0D03400g	LAFA0F17392g	LAMI0E08394g	SAKL0H08690g	KLTH0E13772g
L.A1	A1LA01-093688g	1	+	615	615	LANO0E07602g	LAME0D09362g	ZYRO0A10384g	LAWA0F13124g	LACI0G13498g	LAFE0G15368g	LADA0D03378g	LAFA0F17370g	LAMI0E08416g	SAKL0H08668g	KLTH0E13794g
L.A1	A1LA01-093666g	1	-	616	616	LANO0E07580g	LAME0D09384g	ZYRO0A10362g		LACI0G13520g	LAFE0G15390g	LADA0D03356g	LAFA0F17348g	LAMI0E08438g	SAKL0H08646g	KLTH0E13816g
L.A1	A1LA01-093644g	1	+	617	617	LANO0E07558g	LAME0D09406g	ZYRO0A10340g		LACI0G13542g	LAFE0G15412g	LADA0D03334g	LAFA0F17326g	LAMI0E08460g	SAKL0H08624g	KLTH0E13838g
L.A1	A1LA01-093622g	1	+	618	618	LANO0E07536g	LAME0D09428g	ZYRO0A10318g		LACI0G13564g	LAFE0G15434g	LADA0D03312g	LAFA0F17304g	LAMI0E08482g	SAKL0H08602g	KLTH0E13860g
L.A1	A1LA01-093600g	1	+	619	619	LANO0E07514g	LAME0D09450g	ZYRO0A10296g		LACI0G13586g	LAFE0G15456g	LADA0D03290g	LAFA0F17282g	LAMI0E08504g	SAKL0H08580g	KLTH0E13882g
L.A1	A1LA01-093578g	1	-	620	620	LANO0E07492g	LAME0D09472g	ZYRO0F10582g	LAWA0F13190g	LACI0G13696g	LAFE0G15236g	LADA0D03268g	LAFA0F17260g	LAMI0E08526g	SAKL0H08558g	KLTH0E13904g
L.A1	A1LA01-093556g	1	-	621	621	LANO0H13894g	LAME0H13124g	ZYRO0F10604g	LAWA0E09076g			LADA0C08658g		LAMI0C09780g	SAKL0H08536g	KLTH0D09372g
L.A1	A1LA01-093534g	1	+	622	622	LANO0H13916g	LAME0H13146g	ZYRO0F10648g	LAWA0E09120g	LACI0G08812g	LAFE0G10616g	LADA0C08614g	LAFA0E17744g	LAMI0C09802g	SAKL0H08492g	KLTH0D09416g
L.A1	A1LA01-093512g	1	+	623	623	LANO0H13960g	LAME0H13168g	ZYRO0F10670g	LAWA0E09142g	LACI0G08790g	LAFE0G10594g		LAFA0E17766g	LAMI0C09824g	SAKL0H08470g	KLTH0D09438g
L.A1	A1LA01-093490g	1	-	624	624	LANO0H13982g	LAME0H13190g	ZYRO0F10692g	LAWA0E09164g	LACI0G08768g	LAFE0G10572g	LADA0C08592g	LAFA0E17788g	LAMI0C09846g	SAKL0H08448g	KLTH0D09482g
L.A1	A1LA01-093468g	1	+	625	625	LANO0H14004g	LAME0H13212g	ZYRO0F10714g	LAWA0E09186g	LACI0G08746g	LAFE0G10550g	LADA0C08570g	LAFA0E17810g	LAMI0C09868g	SAKL0H08426g	KLTH0D09504g
L.A1	A1LA01-093446g	1	+	626	626	LANO0H14026g	LAME0H13234g	ZYRO0F10736g	LAWA0E09208g	LACI0G08724g	LAFE0G10528g	LADA0C08548g	LAFA0E17832g	LAMI0C09890g	SAKL0H08404g	KLTH0D09526g
L.A1	A1LA01-093424g	1	-	627	627	LANO0H14048g	LAME0H13256g	ZYRO0F10758g	LAWA0E09230g	LACI0G08702g	LAFE0G10506g	LADA0C08526g	LAFA0E17854g	LAMI0C09912g	SAKL0H08382g	KLTH0D09548g
L.A1	A1LA01-093380g	1	-	628	628	LANO0H14092g	LAME0H13300g	ZYRO0F10780g	LAWA0E09274g	LACI0G08636g	LAFE0G10462g	LADA0C08482g	LAFA0E17898g	LAMI0C09956g	SAKL0H08338g	KLTH0D09592g
L.A1	A1LA01-093358g	1	+	629	629	LANO0H14114g	LAME0H13322g	ZYRO0F10802g	LAWA0E09296g	LACI0G08614g	LAFE0G10440g	LADA0C08460g	LAFA0E17920g	LAMI0C09978g	SAKL0H08316g	KLTH0D09614g
L.A1	A1LA01-093336g	1	-	630	630	LANO0H14136g	LAME0H13344g	ZYRO0F10824g	LAWA0E09318g	LACI0G08592g	LAFE0G10418g	LADA0C08438g	LAFA0E17942g	LAMI0C10000g	SAKL0H08294g	KLTH0D09636g
L.A1	A1LA01-093314g	1	+	631	631	LANO0H14158g	LAME0H13366g	ZYRO0F10846g	LAWA0E09340g	LACI0G08570g	LAFE0G10396g	LADA0C08416g	LAFA0E17964g	LAMI0C10022g	SAKL0H08272g	KLTH0D09658g
L.A1	A1LA01-093292g	1	-	632	632	LANO0H14180g	LAME0H13388g	ZYRO0F10868g	LAWA0E09362g	LACI0G08548g	LAFE0G10374g	LADA0C08394g	LAFA0E17986g	LAMI0C10044g	SAKL0H08250g	KLTH0D09680g
L.A1	A1LA01-093270g	1	+	633	633	LANO0H14202g	LAME0H13410g	ZYRO0F10890g	LAWA0E09384g	LACI0G08526g	LAFE0G10352g	LADA0C08372g	LAFA0E18008g	LAMI0C10066g	SAKL0H08228g	KLTH0D09702g
L.A1	A1LA01-093248g	1	-	634	634	LANO0H14224g	LAME0H13432g	ZYRO0F10912g	LAWA0E09406g	LACI0G08504g	LAFE0G10330g	LADA0C08350g	LAFA0E18030g	LAMI0C10088g	SAKL0H08206g	KLTH0D09724g
L.A1	A1LA01-093226g	1	+	635	635	LANO0H14246g	LAME0H13454g	ZYRO0F10934g		LACI0G08482g	LAFE0G10154g	LADA0C08328g	LAFA0E18052g	LAMI0C10110g	SAKL0H08162g	KLTH0D09746g
L.A1	A1LA01-093204g	1	-	636	636	LANO0H14268g	LAME0F04808g	ZYRO0F11088g		LACI0G08438g	LAFE0G10110g	LADA0C08284g	LAFA0E18074g	LAMI0C10132g	SAKL0H08096g	KLTH0D09790g
L.A1	A1LA01-093182g	1	+	637	637	LANO0H14290g	LAME0F04786g	ZYRO0F11066g	LAWA0E09494g	LACI0G08416g	LAFE0G10088g	LADA0C08262g	LAFA0E18096g	LAMI0C10154g	SAKL0H08074g	KLTH0D09812g
L.A1	A1LA01-093160g	1	-	638	638	LANO0H14312g	LAME0F04764g	ZYRO0F11044g	LAWA0E09516g	LACI0G08394g	LAFE0G10066g	LADA0C08240g	LAFA0E18118g	LAMI0C10176g	SAKL0H08052g	KLTH0D09834g
L.A1	A1LA01-093138g	1	-	639	639	LANO0H14334g	LAME0F04742g	ZYRO0F11022g	LAWA0E09538g	LACI0G08372g	LAFE0G10044g	LADA0C08218g	LAFA0E18140g	LAMI0C10198g	SAKL0H08030g	KLTH0D09856g
L.A1	A1LA01-093116g	1	+	640	640	LANO0H14356g	LAME0F04720g	ZYRO0F11000g		LACI0G08350g	LAFE0G10022g	LADA0C08196g	LAFA0E18162g	LAMI0C10220g	SAKL0H08008g	KLTH0D09878g
L.A1	A1LA01-093094g	1	+	641	641	LANO0H14400g	LAME0F04698g	ZYRO0F10978g	LAWA0E09582g	LACI0G08328g	LAFE0G10000g	LADA0C08152g	LAFA0E18184g	LAMI0C10242g	SAKL0H07986g	KLTH0D09900g
L.A1	A1LA01-093072g	1	+	642	642	LANO0H14378g	LAME0F04676g	ZYRO0F10956g		LACI0G08306g	LAFE0G09978g	LADA0C08130g	LAFA0E18206g		SAKL0H07964g	KLTH0D09922g
L.A1	A1LA01-093050g	1	+	643	643	LANO0H14444g	LAME0F04654g	ZYRO0F06072g	LAWA0E09626g	LACI0G08284g	LAFE0G09956g	LADA0C08108g	LAFA0E18228g	LAMI0C10264g	SAKL0H07942g	KLTH0D09944g
L.A1	A1LA01-093028g	1	-	644	644	LANO0H14466g	LAME0F04632g	ZYRO0F06116g	LAWA0E09648g	LACI0G08262g	LAFE0G09934g	LADA0C08086g	LAFA0E18250g	LAMI0C10286g	SAKL0H07920g	KLTH0D09966g
L.A1	A1LA01-093006g	1	+	645	645	LANO0H14488g	LAME0F04610g	ZYRO0F06138g		LACI0G08240g	LAFE0G09912g	LADA0C08064g	LAFA0E18272g	LAMI0H06568g	SAKL0H07898g	KLTH0D09988g
L.A1	A1LA01-092984g	1	-	646	646	LANO0H14510g	LAME0F04588g	ZYRO0F06160g	LAWA0E09692g	LACI0G08218g	LAFE0G09890g	LADA0C08042g	LAFA0E18294g	LAMI0H06546g	SAKL0H07876g	KLTH0D10010g
L.A1	A1LA01-092962g	1	-	647	647	LANO0H14532g	LAME0F04566g	ZYRO0F06182g	LAWA0E09714g	LACI0G08196g	LAFE0G09868g	LADA0C08020g	LAFA0E18316g	LAMI0H06524g	SAKL0H07854g	KLTH0D10032g
L.A1	A1LA01-092940g	1	-	648	648	LANO0H14554g	LAME0F04544g	ZYRO0F06204g	LAWA0E09736g	LACI0G08174g	LAFE0G09846g	LADA0C07998g	LAFA0E18338g	LAMI0H06502g	SAKL0H07832g	KLTH0D10054g
L.A1	A1LA01-092918g	1	+	649	649	LANO0H14576g	LAME0F04522g	ZYRO0F06226g	LAWA0E09758g	LACI0G08152g	LAFE0G09824g	LADA0C07976g	LAFA0E18360g	LAMI0H06480g	SAKL0H07810g	KLTH0D10076g
L.A1	A1LA01-092896g	1	-	650	650	LANO0H14598g	LAME0F04500g	ZYRO0F06248g	LAWA0E09780g	LACI0G08130g	LAFE0G09802g	LADA0C07954g	LAFA0E18382g	LAMI0H06458g	SAKL0H07788g	KLTH0D10098g
L.A1	A1LA01-092874g	1	+	651	651	LANO0H14620g	LAME0F04478g	ZYRO0F06270g	LAWA0E09802g	LACI0G08108g	LAFE0G09780g	LADA0C07932g	LAFA0E18404g	LAMI0H06436g	SAKL0H07744g	KLTH0D10120g
L.A1	A1LA01-092852g	1	+	652	652	LANO0H14642g	LAME0F04456g	ZYRO0F06292g	LAWA0E09824g	LACI0G08086g	LAFE0G09758g	LADA0C07910g	LAFA0E18426g	LAMI0H06414g	SAKL0H07678g	KLTH0D10164g
L.A1	A1LA01-092830g	1	+	653	653	LANO0H14664g	LAME0F04434g	ZYRO0F06314g	LAWA0E09846g	LACI0G08064g	LAFE0G09736g	LADA0C07888g	LAFA0E18448g	LAMI0H06392g	SAKL0H07656g	KLTH0D10186g
L.A1	A1LA01-092808g	1	-	654	654	LANO0H14686g	LAME0F04412g	ZYRO0F06336g	LAWA0E09868g	LACI0G08020g	LAFE0G09692g	LADA0C07866g	LAFA0E18382g		SAKL0H07612g	KLTH0D10208g
L.A1	A1LA01-092786g	1	-	655	655	LANO0H14686g	LAME0F04390g	ZYRO0F06358g	LAWA0E09868g	LACI0G08020g	LAFE0G09692g	LADA0C07844g	LAFA0E18492g	LAMI0H06370g	SAKL0H07590g	KLTH0D10230g
L.A1	A1LA01-092764g	1	-	656	656			ZYRO0F06380g		LACI0G07998g	LAFE0G09670g	LADA0C07822g			SAKL0H07568g
L.A1	A1LA01-092742g	1	-	657	657	LANO0H14730g	LAME0F04368g	ZYRO0F06402g	LAWA0E09912g	LACI0G07976g	LAFE0G09648g	LADA0C07822g	LAFA0E18514g	LAMI0H06348g	SAKL0H07546g	KLTH0D10252g
L.A1	A1LA01-092720g	1	-	658	658	LANO0H14752g	LAME0F04346g	ZYRO0F06424g	LAWA0E09934g	LACI0G07954g	LAFE0G09626g	LADA0C07800g	LAFA0E18536g	LAMI0H06326g	SAKL0H07524g	KLTH0D10274g
L.A1	A1LA01-092698g	1	+	659	659	LANO0H14774g	LAME0F04324g	ZYRO0F06446g	LAWA0E09956g	LACI0G07932g	LAFE0G09604g	LADA0C07778g	LAFA0E18558g	LAMI0H06304g	SAKL0H07502g	KLTH0D10296g
L.A1	A1LA01-092676g	1	-	660	660	LANO0H14796g	LAME0F04302g	ZYRO0F06468g	LAWA0E09978g	LACI0G07910g	LAFE0G09582g	LADA0C07756g	LAFA0E18580g	LAMI0H06282g	SAKL0H07458g	KLTH0D10318g
L.A1	A1LA01-092654g	1	-	661	661	LANO0H14818g	LAME0F04280g	ZYRO0F06490g	LAWA0E10000g	LACI0G07888g	LAFE0G09560g	LADA0C07734g	LAFA0E18602g	LAMI0H06238g	SAKL0H07436g	KLTH0D10340g
L.A1	A1LA01-092632g	1	+	662	662	LANO0H14840g	LAME0F04258g	ZYRO0F06512g	LAWA0E10022g	LACI0G07866g	LAFE0G09538g	LADA0C07712g	LAFA0E18624g	LAMI0H06216g	SAKL0H07414g	KLTH0D10384g
L.A1	A1LA01-092610g	1	-	663	663	LANO0H14862g	LAME0F04236g	ZYRO0F06534g	LAWA0E10044g	LACI0G07844g	LAFE0G09516g	LADA0C07690g	LAFA0E18646g	LAMI0H06194g	SAKL0H07392g	KLTH0D10406g
L.A1	A1LA01-092588g	1	+	664	664	LANO0H14884g	LAME0F04214g	ZYRO0F06556g	LAWA0E10066g	LACI0G07822g	LAFE0G09494g	LADA0C07668g	LAFA0E18668g	LAMI0H06172g	SAKL0H07370g	KLTH0D10428g
L.A1	A1LA01-092566g	1	-	665	665	LANO0H14906g	LAME0F04192g	ZYRO0F06578g	LAWA0E10077g	LACI0G07800g	LAFE0G09472g	LADA0C07646g	LAFA0E18690g	LAMI0H06150g	SAKL0H07348g	KLTH0D10450g
L.A1	A1LA01-092544g	1	+	666	666	LANO0H14928g	LAME0F13124g	ZYRO0F06600g	LAWA0E10088g	LACI0G07778g	LAFE0G09450g	LADA0C07624g	LAFA0B06436g	LAMI0H06128g	SAKL0H07326g	KLTH0D10472g
L.A1	A1LA01-092522g	1	+	667	667	LANO0H14950g	LAME0F13102g	ZYRO0F06622g	LAWA0E10110g	LACI0G07756g	LAFE0G09428g	LADA0C07602g	LAFA0B06414g	LAMI0H06106g	SAKL0H07304g	KLTH0D10494g
L.A1	A1LA01-092478g	1	-	668	668	LANO0H14994g	LAME0F13058g	ZYRO0F06644g	LAWA0E10154g	LACI0G07712g	LAFE0G09384g	LADA0C07558g	LAFA0B06370g	LAMI0H06062g	SAKL0H07260g	KLTH0D10538g
L.A1	A1LA01-092456g	1	-	669	669	LANO0H15016g	LAME0F13036g	ZYRO0F06688g	LAWA0E10176g	LACI0G07690g	LAFE0G09362g	LADA0C07536g	LAFA0B06348g	LAMI0H06040g	SAKL0H07238g	KLTH0D10560g
L.A1	A1LA01-092434g	1	+	670	670	LANO0H15038g	LAME0F13014g	ZYRO0F06710g	LAWA0E10198g	LACI0G07668g	LAFE0G09340g	LADA0C07492g	LAFA0B06326g	LAMI0H06018g	SAKL0H07216g	KLTH0D10582g
L.A1	A1LA01-092412g	1	-	671	671	LANO0H15060g	LAME0F12992g	ZYRO0F06732g	LAWA0E10220g	LACI0G07646g	LAFE0G09318g	LADA0C07470g	LAFA0B06304g	LAMI0H05996g	SAKL0H07194g	KLTH0D10604g
L.A1	A1LA01-092390g	1	+	672	672	LANO0H15082g	LAME0F12970g	ZYRO0F06754g	LAWA0E10242g	LACI0G07624g	LAFE0G09296g	LADA0C07448g	LAFA0B06282g	LAMI0H05974g	SAKL0H07172g	KLTH0D10626g
L.A1	A1LA01-092368g	1	+	673	673	LANO0H15104g	LAME0F12948g	ZYRO0F06776g	LAWA0E10264g	LACI0G07602g	LAFE0G09274g	LADA0C07426g	LAFA0B06260g	LAMI0H05930g	SAKL0H07150g	KLTH0D10648g
L.A1	A1LA01-092346g	1	+	674	674	LANO0H15126g	LAME0F12926g	ZYRO0F06798g	LAWA0E10286g	LACI0G07580g	LAFE0G09252g	LADA0C07382g	LAFA0B06238g	LAMI0H05908g	SAKL0H07128g	KLTH0D10670g
L.A1	A1LA01-092324g	1	+	675	675	LANO0H15148g	LAME0F12904g	ZYRO0F06820g	LAWA0E10308g	LACI0G07558g	LAFE0G09230g	LADA0C07360g	LAFA0B06216g	LAMI0H05886g	SAKL0H07106g	KLTH0D10692g
L.A1	A1LA01-092302g	1	+	676	676	LANO0H15170g	LAME0F12882g	ZYRO0F06842g	LAWA0E10330g	LACI0G07536g	LAFE0G09208g	LADA0C07338g	LAFA0B06194g	LAMI0H05864g	SAKL0H07084g	KLTH0D10714g
L.A1	A1LA01-092280g	1	-	677	677	LANO0H15192g	LAME0F12860g	ZYRO0F06864g	LAWA0E10352g	LACI0G07514g	LAFE0G09186g	LADA0C07316g	LAFA0B06172g	LAMI0H05842g	SAKL0H07062g	KLTH0D10736g
L.A1	A1LA01-092236g	1	-	678	678	LANO0H15346g		ZYRO0F06908g	LAWA0E10374g	LACI0G07470g	LAFE0G09142g	LADA0C07294g	LAFA0B06150g	LAMI0H05798g	SAKL0H07007g	KLTH0D10780g
L.A1	A1LA01-092214g	1	+	679	679	LANO0H15368g	LAME0F12816g	ZYRO0F06930g	LAWA0E10396g	LACI0G07448g	LAFE0G09076g	LADA0C07272g	LAFA0B06128g	LAMI0H05754g	SAKL0H06996g	KLTH0D10802g
L.A1	A1LA01-092192g	1	+	680	680	LANO0H15390g	LAME0F12794g	ZYRO0F06952g	LAWA0E10418g	LACI0G07426g	LAFE0G09054g	LADA0C07250g	LAFA0B06106g	LAMI0F04764g	SAKL0H06974g	KLTH0D10824g
L.A1	A1LA01-092170g	1	+	681	681	LANO0H15412g	LAME0F12772g	ZYRO0F06974g	LAWA0E10440g	LACI0G07404g	LAFE0G09032g	LADA0C07228g	LAFA0B06084g	LAMI0F04742g	SAKL0H06952g	KLTH0D10846g
L.A1	A1LA01-092148g	1	+	682	682	LANO0H15434g	LAME0F12750g	ZYRO0F06996g	LAWA0E10462g	LACI0G07382g	LAFE0G09010g	LADA0C07206g	LAFA0B06062g	LAMI0F04720g	SAKL0H06930g	KLTH0D10868g
L.A1	A1LA01-092126g	1	-	683	683	LANO0H15456g	LAME0F12728g	ZYRO0F07018g	LAWA0E10506g	LACI0G07360g	LAFE0G08988g	LADA0C07184g	LAFA0B06040g	LAMI0F04698g	SAKL0H06908g	KLTH0D10890g
L.A1	A1LA01-092104g	1	+	684	684	LANO0H15478g	LAME0F12706g	ZYRO0F07040g	LAWA0E10506g	LACI0G07338g	LAFE0G08966g	LADA0D02894g	LAFA0B06018g	LAMI0F04676g	SAKL0H06886g	KLTH0D10912g
L.A1	A1LA01-092082g	1	+	685	685	LANO0H15500g	LAME0F12684g	ZYRO0F07062g	LAWA0E10528g	LACI0G07316g	LAFE0G08944g	LADA0D02938g	LAFA0B05996g	LAMI0F04654g	SAKL0H06864g	KLTH0D10934g
L.A1	A1LA01-092060g	1	+	686	686	LANO0H15522g	LAME0F12662g	ZYRO0F07084g	LAWA0E10550g	LACI0G07294g	LAFE0G08922g	LADA0C07140g	LAFA0B05974g	LAMI0F04632g	SAKL0H06842g	KLTH0D10956g
L.A1	A1LA01-092016g	1	-	687	687	LANO0H15566g	LAME0F12618g	ZYRO0F07150g	LAWA0E10594g	LACI0G07228g	LAFE0G08878g	LADA0C07096g	LAFA0B05908g	LAMI0F04588g	SAKL0H06798g	KLTH0D11000g
L.A1	A1LA01-091994g	1	+	688	688	LANO0H15588g	LAME0F12596g	ZYRO0F07172g	LAWA0E10616g	LACI0G07206g	LAFE0G08856g	LADA0C07074g	LAFA0B05886g	LAMI0F04566g	SAKL0H06776g	KLTH0D11022g
L.A1	A1LA01-091972g	1	-	689	689	LANO0H15610g	LAME0F12574g	ZYRO0F07194g	LAWA0E10638g	LACI0G07184g	LAFE0G08834g	LADA0C07052g	LAFA0B05864g	LAMI0F04544g	SAKL0H06754g	KLTH0D11044g
L.A1	A1LA01-091950g	1	+	690	690	LANO0H15632g	LAME0F12552g	ZYRO0F07216g	LAWA0E10660g	LACI0G07162g	LAFE0G08812g	LADA0C07030g	LAFA0B05842g	LAMI0F04522g	SAKL0H06732g	KLTH0D11066g
L.A1	A1LA01-091928g	1	-	691	691	LANO0H15654g	LAME0F12530g	ZYRO0F07238g	LAWA0E10682g	LACI0G07140g	LAFE0G08790g	LADA0C07008g	LAFA0B05820g	LAMI0F04500g	SAKL0H06710g	KLTH0D11088g
L.A1	A1LA01-091906g	1	-	692	692	LANO0H15676g	LAME0F12508g	ZYRO0F07260g	LAWA0E10704g	LACI0G07118g	LAFE0G08768g	LADA0C06986g	LAFA0B05798g	LAMI0F04478g	SAKL0H06688g	KLTH0D11110g
L.A1	A1LA01-091884g	1	+	693	693	LANO0H15698g	LAME0F12486g	ZYRO0F07282g	LAWA0E10726g	LACI0G07096g	LAFE0G08746g	LADA0C06964g	LAFA0B05776g	LAMI0F04456g	SAKL0H06666g	KLTH0D11132g
L.A1	A1LA01-091862g	1	+	694	694	LANO0H15720g	LAME0F12464g	ZYRO0F07304g	LAWA0E10748g	LACI0G07074g	LAFE0G08724g	LADA0C06942g	LAFA0B05754g	LAMI0F04434g	SAKL0H06644g	KLTH0D11154g
L.A1	A1LA01-091840g	1	-	695	695	LANO0H15742g	LAME0F12442g	ZYRO0F07326g	LAWA0E10770g	LACI0G07052g	LAFE0G08702g	LADA0C06920g	LAFA0B05732g	LAMI0F04412g	SAKL0H06622g	KLTH0D11176g
L.A1	A1LA01-091818g	1	-	696	696	LANO0H15764g	LAME0F12420g	ZYRO0F07348g	LAWA0E10792g	LACI0G07030g	LAFE0G08680g	LADA0C06898g	LAFA0B05710g	LAMI0F04390g	SAKL0H06578g	KLTH0D11198g
L.A1	A1LA01-091774g	1	+	697	697	LANO0H15786g	LAME0F12398g	ZYRO0F07370g	LAWA0E10836g	LACI0G06986g	LAFE0G08636g	LADA0C06876g	LAFA0B05688g	LAMI0F04346g	SAKL0H06534g	KLTH0D11242g
L.A1	A1LA01-091752g	1	+	698	698	LANO0H15808g	LAME0F12376g	ZYRO0F07392g	LAWA0E10858g	LACI0G06964g	LAFE0G08614g	LADA0C06854g	LAFA0B05666g	LAMI0F04324g	SAKL0H06512g	KLTH0D11264g
L.A1	A1LA01-091730g	1	+	699	699	LANO0H15830g	LAME0F12354g	ZYRO0F07414g	LAWA0E10880g	LACI0G06942g	LAFE0G08592g	LADA0C06832g	LAFA0B05644g	LAMI0F04302g	SAKL0H06490g	KLTH0D11286g
L.A1	A1LA01-091686g	1	-	700	700	LANO0H15874g	LAME0F12288g	ZYRO0F07436g	LAWA0E10924g	LACI0G06898g	LAFE0G08548g	LADA0C06766g	LAFA0B05600g	LAMI0F04258g	SAKL0H06446g	KLTH0D11330g
L.A1	A1LA01-091664g	1	+	701	701	LANO0H15896g	LAME0F12266g	ZYRO0F07458g		LACI0G06876g	LAFE0G08526g	LADA0C06744g	LAFA0B05578g	LAMI0F04236g	SAKL0H06424g	KLTH0D11352g
L.A1	A1LA01-091620g	1	+	702	702	LANO0H15940g	LAME0F12222g	ZYRO0F07480g	LAWA0E10990g	LACI0G06832g	LAFE0G08482g	LADA0C06700g	LAFA0B05534g	LAMI0F04192g	SAKL0H06380g	KLTH0D11396g
L.A1	A1LA01-091598g	1	-	703	703	LANO0H15962g		ZYRO0F07502g	LAWA0E11012g	LACI0G06810g	LAFE0G08460g		LAFA0B05512g		SAKL0H06358g	KLTH0D11418g
L.A1	A1LA01-091576g	1	-	704	704	LANO0H15984g	LAME0F12200g	ZYRO0F07524g	LAWA0E11034g	LACI0G06788g	LAFE0G08438g	LADA0C06678g	LAFA0B05512g	LAMI0F04148g	SAKL0H06336g	KLTH0D11440g
L.A1	A1LA01-091554g	1	-	705	705	LANO0H16006g	LAME0F12178g	ZYRO0F07546g	LAWA0E11078g	LACI0G06766g	LAFE0G08416g	LADA0C06656g	LAFA0B05490g	LAMI0F04126g	SAKL0H06292g	KLTH0D11462g
L.A1	A1LA01-091532g	1	+	706	706	LANO0H16028g	LAME0F12156g	ZYRO0F07568g	LAWA0E11100g		LAFE0G08394g	LADA0C06634g	LAFA0B05468g	LAMI0F04104g	SAKL0H06270g	KLTH0D11484g
L.A1	A1LA01-091510g	1	+	707	707	LANO0H16050g	LAME0F12134g	ZYRO0F07590g	LAWA0E11122g	LACI0G06722g	LAFE0G08372g	LADA0C06612g	LAFA0B05446g	LAMI0F04082g	SAKL0H06248g	KLTH0D11506g
L.A1	A1LA01-091466g	1	+	708	708	LANO0H16094g	LAME0F12090g	ZYRO0F07634g	LAWA0E11166g	LACI0G06678g	LAFE0G08328g	LADA0C06568g	LAFA0B05402g	LAMI0F04038g	SAKL0H06204g	KLTH0D11550g
L.A1	A1LA01-091444g	1	-	709	709	LANO0H16116g	LAME0F12068g	ZYRO0F07656g	LAWA0E11177g	LACI0G06656g	LAFE0G08306g	LADA0C06546g	LAFA0B05380g	LAMI0F04016g	SAKL0H06182g	KLTH0D11572g
L.A1	A1LA01-091422g	1	-	710	710	LANO0H16138g	LAME0H02168g	ZYRO0F07678g	LAWA0E11188g	LACI0G06634g	LAFE0G08284g	LADA0C06524g	LAFA0B05358g	LAMI0F03994g	SAKL0H06160g	KLTH0D11594g
L.A1	A1LA01-091400g	1	-	711	711	LANO0H16160g	LAME0H02190g	ZYRO0F07700g	LAWA0E11210g	LACI0G06612g	LAFE0G08262g	LADA0C06502g	LAFA0B05336g	LAMI0F03972g	SAKL0H06138g	KLTH0D11616g
L.A1	A1LA01-091378g	1	+	712	712	LANO0H16182g		ZYRO0F07722g	LAWA0E11232g	LACI0G06590g	LAFE0G08240g			LAMI0F03950g	SAKL0H06116g	KLTH0D11638g
L.A1	A1LA01-091356g	1	-	713	713	LANO0H16204g	LAME0H02212g	ZYRO0F07744g	LAWA0E11254g	LACI0G06568g	LAFE0G08218g	LADA0C06480g	LAFA0B05314g		SAKL0H06094g	KLTH0D11660g
L.A1	A1LA01-091334g	1	+	714	714	LANO0H16226g	LAME0H02234g	ZYRO0F07766g	LAWA0E11276g	LACI0G06546g	LAFE0G08218g	LADA0C06458g	LAFA0B05292g	LAMI0F03928g	SAKL0H06072g	KLTH0D11682g
L.A1	A1LA01-091312g	1	+	715	715	LANO0H16248g	LAME0H02256g	ZYRO0F07788g	LAWA0E11298g	LACI0G06524g	LAFE0G08196g	LADA0C06436g	LAFA0B05270g	LAMI0F03906g	SAKL0H06050g	KLTH0D11704g
L.A1	A1LA01-091290g	1	-	716	716	LANO0H16270g	LAME0H02278g	ZYRO0F07810g	LAWA0E11342g	LACI0G06502g	LAFE0G08174g	LADA0C06414g	LAFA0B05248g	LAMI0F03884g	SAKL0H06028g	KLTH0D11726g
L.A1	A1LA01-091268g	1	+	717	717	LANO0H16292g	LAME0H02300g	ZYRO0D10912g	LAWA0E11342g	LACI0G06480g	LAFE0G08152g	LADA0C06392g	LAFA0B05226g	LAMI0F03862g	SAKL0H06006g	KLTH0D11748g
L.A1	A1LA01-091246g	1	-	718	718	LANO0H16314g	LAME0H02322g	ZYRO0D10934g	LAWA0E11364g	LACI0G06458g	LAFE0G08130g	LADA0C06370g	LAFA0B05204g	LAMI0F03840g	SAKL0H05984g	KLTH0D11748g
L.A1	A1LA01-091224g	1	+	719	719	LANO0H16336g	LAME0H02344g	ZYRO0D10956g	LAWA0E11386g	LACI0G06436g	LAFE0G08108g	LADA0C06348g	LAFA0B05182g	LAMI0F03818g	SAKL0H05962g	KLTH0D11792g
L.A1	A1LA01-091202g	1	+	720	720	LANO0H16358g	LAME0H02366g	ZYRO0D10978g	LAWA0E11408g	LACI0G06414g	LAFE0G08086g	LADA0C06326g	LAFA0B05160g	LAMI0F03796g	SAKL0H05940g	KLTH0D11814g
L.A1	A1LA01-091180g	1	-	721	721	LANO0H16380g	LAME0H02388g	ZYRO0D11000g	LAWA0E11430g	LACI0G06392g	LAFE0G08064g	LADA0C06304g	LAFA0B05138g	LAMI0F03774g	SAKL0H05918g	KLTH0D11836g
L.A1	A1LA01-091158g	1	-	722	722	LANO0H16402g	LAME0H02410g	ZYRO0F11814g	LAWA0E11452g	LACI0G06370g	LAFE0G08042g	LADA0C06282g	LAFA0B05094g	LAMI0F03752g	SAKL0H05896g	KLTH0D11858g
L.A1	A1LA01-091136g	1	+	723	723	LANO0H16424g	LAME0H02432g	ZYRO0F11836g	LAWA0E11474g	LACI0G06348g	LAFE0G08020g	LADA0C06260g	LAFA0B05072g	LAMI0F03730g	SAKL0H05874g	KLTH0D11880g
L.A1	A1LA01-091114g	1	-	724	724	LANO0H16446g	LAME0H02454g	ZYRO0F11858g	LAWA0E11496g	LACI0G06326g	LAFE0G07998g	LADA0C06238g	LAFA0B05050g		SAKL0H05852g	KLTH0D11902g
L.A1	A1LA01-091092g	1	+	725	725	LANO0H16468g	LAME0H02476g	ZYRO0F11880g	LAWA0E11518g	LACI0G06304g	LAFE0G07976g	LADA0C06216g	LAFA0B05028g	LAMI0F03708g	SAKL0H05830g	KLTH0D11924g
L.A1	A1LA01-091070g	1	+	726	726	LANO0H16490g	LAME0H02498g	ZYRO0F11902g	LAWA0E11540g	LACI0G06282g	LAFE0G07954g	LADA0C06194g	LAFA0B05006g	LAMI0F03686g	SAKL0H05808g	KLTH0D11946g
L.A1	A1LA01-091048g	1	+	727	727	LANO0H16512g	LAME0H02520g	ZYRO0F11924g		LACI0G06238g	LAFE0G07910g	LADA0C06172g	LAFA0B04984g	LAMI0F03664g	SAKL0H05786g	KLTH0D11968g
L.A1	A1LA01-091026g	1	-	728	728	LANO0H16534g	LAME0H02542g	ZYRO0F11946g	LAWA0E11562g	LACI0G06260g	LAFE0G07932g	LADA0C06150g	LAFA0B04962g	LAMI0F03642g	SAKL0H05764g	KLTH0D11990g
L.A1	A1LA01-091004g	1	+	729	729	LANO0H16556g	LAME0H02564g	ZYRO0F11968g	LAWA0E11584g	LACI0G06238g	LAFE0G07910g	LADA0C06128g	LAFA0B04940g	LAMI0F03620g	SAKL0H05742g	KLTH0D12012g
L.A1	A1LA01-090982g	1	-	730	730	LANO0H16578g	LAME0H02586g	ZYRO0F11990g	LAWA0E11606g	LACI0G06216g	LAFE0G07888g	LADA0C06106g	LAFA0B04918g	LAMI0F03598g	SAKL0H05720g	KLTH0D12034g
L.A1	A1LA01-090960g	1	-	731	731	LANO0H16600g	LAME0H02608g	ZYRO0F12012g	LAWA0E11628g	LACI0G06194g	LAFE0G07866g	LADA0C06084g	LAFA0B04896g	LAMI0A04676g	SAKL0H05698g	KLTH0D12056g
L.A1	A1LA01-090938g	1	+	732	732	LANO0H16622g	LAME0H02630g	ZYRO0F12034g	LAWA0E11650g	LACI0G06172g	LAFE0G07844g	LADA0C06062g	LAFA0B04874g	LAMI0A04654g	SAKL0H05676g	KLTH0D12078g
L.A1	A1LA01-090894g	1	+	733	733	LANO0H16666g	LAME0H02674g	ZYRO0F12078g	LAWA0E11694g	LACI0G06128g	LAFE0G07800g	LADA0C06018g	LAFA0B04830g	LAMI0A04610g	SAKL0H05632g	KLTH0D12122g
L.A1	A1LA01-090872g	1	+	734	734	LANO0H16688g	LAME0H02696g	ZYRO0F12100g	LAWA0E11716g	LACI0G06106g	LAFE0E05732g	LADA0C05996g	LAFA0B04808g	LAMI0A04588g	SAKL0H05610g	KLTH0D12144g
L.A1	A1LA01-090850g	1	-	735	735	LANO0H16710g	LAME0H02718g	ZYRO0F12122g	LAWA0E11738g	LACI0G06084g	LAFE0E05754g	LADA0C05974g	LAFA0B04786g	LAMI0A04566g	SAKL0H05588g	KLTH0D12166g
L.A1	A1LA01-090828g	1	+	736	736	LANO0H16732g	LAME0H02740g	ZYRO0F09284g	LAWA0E11760g	LACI0G06062g	LAFE0E05776g	LADA0C05952g	LAFA0B04764g		SAKL0H05566g	KLTH0D12188g
L.A1	A1LA01-090806g	1	-	737	737	LANO0H16754g	LAME0H02762g	ZYRO0F09306g	LAWA0E11782g	LACI0G06040g	LAFE0E05798g	LADA0C05930g	LAFA0B04742g	LAMI0A04544g	SAKL0H05544g	KLTH0D12210g
L.A1	A1LA01-090784g	1	+	738	738	LANO0H16776g	LAME0H02784g	ZYRO0F09328g	LAWA0E11804g	LACI0G06018g	LAFE0E05820g	LADA0C05908g	LAFA0B04720g	LAMI0A04522g	SAKL0H05500g	KLTH0D12232g
L.A1	A1LA01-090762g	1	-	739	739	LANO0H16798g	LAME0H02806g	ZYRO0F09350g	LAWA0E11826g	LACI0G05996g	LAFE0E05842g	LADA0C05886g	LAFA0B04698g	LAMI0A04500g	SAKL0H05478g	KLTH0D12254g
L.A1	A1LA01-090740g	1	+	740	740	LANO0H16820g	LAME0C04984g	ZYRO0F09372g	LAWA0E11848g	LACI0G05974g	LAFE0E05864g	LADA0C05864g	LAFA0B04676g	LAMI0A04478g	SAKL0H05456g	KLTH0D12276g
L.A1	A1LA01-090718g	1	-	741	741	LANO0H16842g	LAME0C04962g	ZYRO0F09394g	LAWA0E11870g	LACI0G05952g	LAFE0E05886g	LADA0C05842g	LAFA0B04654g		SAKL0H05434g	KLTH0D12298g
L.A1	A1LA01-090674g	1	+	742	742	LANO0H16886g	LAME0C04896g	ZYRO0F09438g	LAWA0E11936g	LACI0G05908g	LAFE0E05930g	LADA0C05798g	LAFA0B04566g	LAMI0A04434g	SAKL0H05390g	KLTH0D12364g
L.A1	A1LA01-090652g	1	+	743	743	LANO0H16908g	LAME0C04874g	ZYRO0F09460g	LAWA0E11958g	LACI0G05886g	LAFE0E05952g	LADA0C05776g	LAFA0B04544g	LAMI0A04412g	SAKL0H05368g	KLTH0D12386g
L.A1	A1LA01-090630g	1	-	744	744	LANO0H16930g	LAME0C04852g	ZYRO0F09482g	LAWA0E11980g	LACI0G05864g	LAFE0E05974g	LADA0C05754g	LAFA0B04522g	LAMI0A04390g	SAKL0H05346g	KLTH0D12408g
L.A1	A1LA01-090608g	1	-	745	745	LANO0H16952g	LAME0C04830g	ZYRO0F09504g	LAWA0E12002g	LACI0G05842g	LAFE0E05996g	LADA0C05732g	LAFA0B04500g	LAMI0A04368g	SAKL0H05324g	KLTH0D12430g
L.A1	A1LA01-090586g	1	+	746	746	LANO0H16974g	LAME0C04808g	ZYRO0F09526g	LAWA0E12024g	LACI0G05820g	LAFE0E06018g	LADA0C05710g	LAFA0B04478g	LAMI0A04346g	SAKL0H05302g	KLTH0D12452g
L.A1	A1LA01-090564g	1	+	747	747	LANO0H16996g	LAME0C04786g	ZYRO0A06248g	LAWA0E12046g	LACI0G05798g	LAFE0E06040g	LADA0C05688g	LAFA0B04456g	LAMI0A04324g	SAKL0H05280g	KLTH0D12474g
L.A1	A1LA01-090542g	1	+	748	748	LANO0H17018g	LAME0C04764g	ZYRO0A06226g	LAWA0E12068g	LACI0G05776g	LAFE0E06062g	LADA0C05666g	LAFA0B04434g	LAMI0A04302g	SAKL0H05258g	KLTH0D12496g
L.A1	A1LA01-090520g	1	+	749	749			ZYRO0A06204g		LACI0G05754g	LAFE0E06084g				SAKL0H05236g
L.A1	A1LA01-090498g	1	-	750	750	LANO0H17040g	LAME0C04742g	ZYRO0A06182g	LAWA0E12288g	LACI0G05732g	LAFE0E06106g	LADA0C05622g	LAFA0B04412g	LAMI0A04280g	SAKL0H05214g	KLTH0D12518g
L.A1	A1LA01-090454g	1	+	751	751	LANO0H17084g	LAME0C04698g	ZYRO0A06160g	LAWA0E12266g	LACI0G05688g	LAFE0E06150g	LADA0C05578g	LAFA0B04368g	LAMI0A04192g	SAKL0H05170g	KLTH0D12584g
L.A1	A1LA01-090432g	1	+	752	752	LANO0H17106g	LAME0C04676g	ZYRO0A06138g	LAWA0E12288g	LACI0G05666g	LAFE0E06172g	LADA0C05556g	LAFA0B04346g	LAMI0A04170g	SAKL0H05148g	KLTH0D12606g
L.A1	A1LA01-090410g	1	-	753	753	LANO0H17128g	LAME0C04654g	ZYRO0A06116g	LAWA0E12310g	LACI0G05644g	LAFE0E06194g	LADA0C05534g	LAFA0B04324g	LAMI0A03906g	SAKL0H05126g	KLTH0D12628g
L.A1	A1LA01-090388g	1	+	754	754	LANO0H17172g	LAME0C04610g	ZYRO0A06072g	LAWA0E12354g	LACI0G05600g	LAFE0E06238g	LADA0C05468g	LAFA0B04280g	LAMI0A04082g	SAKL0H05082g	KLTH0D12672g
L.A1	A1LA01-090366g	1	-	755	755	LANO0H17194g	LAME0C04588g	ZYRO0A06050g	LAWA0E12376g	LACI0G05578g	LAFE0E06260g	LADA0C05446g	LAFA0B04258g	LAMI0A04060g	SAKL0H05060g	KLTH0D12694g
L.A1	A1LA01-090344g	1	-	756	756	LANO0H17216g	LAME0C04566g	ZYRO0A06028g	LAWA0E12398g	LACI0G05556g	LAFE0E06282g	LADA0C05424g	LAFA0B04236g	LAMI0A04038g	SAKL0H05038g	KLTH0D12716g
L.A1	A1LA01-090322g	1	-	757	757	LANO0H17238g	LAME0C04544g	ZYRO0A06006g	LAWA0E12442g	LACI0G05534g	LAFE0E06304g	LADA0C05402g	LAFA0B04214g	LAMI0A04016g	SAKL0H05016g	KLTH0D12738g
L.A1	A1LA01-090300g	1	+	758	758	LANO0H17260g	LAME0H05314g	ZYRO0A05962g	LAWA0E12706g	LACI0G05512g	LAFE0E06326g	LADA0C05380g	LAFA0E08086g	LAMI0A03994g	SAKL0H04994g	KLTH0D12760g
L.A1	A1LA01-090278g	1	-	759	759	LANO0H17282g	LAME0H05292g	ZYRO0A05940g	LAWA0E12684g	LACI0G05490g	LAFE0E06348g	LADA0C05358g	LAFA0E08064g	LAMI0A03972g	SAKL0H04972g	KLTH0D12782g
L.A1	A1LA01-090256g	1	-	760	760	LANO0H17304g	LAME0H05270g	ZYRO0A05918g	LAWA0E12662g	LACI0G05468g	LAFE0E06370g	LADA0C05336g	LAFA0E08042g	LAMI0A03950g	SAKL0H04950g	KLTH0D12804g
L.A1	A1LA01-090234g	1	+	761	761	LANO0H17326g	LAME0H05248g	ZYRO0A05896g	LAWA0E12596g	LACI0G05446g	LAFE0E06392g	LADA0C05314g	LAFA0E08020g	LAMI0A03928g	SAKL0H04928g	KLTH0D12826g
L.A1	A1LA01-090212g	1	+	762	762	LANO0H17348g	LAME0H05226g	ZYRO0A05874g	LAWA0E12618g	LACI0G05424g	LAFE0E06414g	LADA0C05292g	LAFA0E07976g	LAMI0A03906g	SAKL0H04906g	KLTH0D12848g
L.A1	A1LA01-090190g	1	+	763	763	LANO0H17370g	LAME0H05204g	ZYRO0A05874g	LAWA0E12618g	LACI0G05402g	LAFE0E06436g	LADA0C05270g	LAFA0E07976g	LAMI0A03884g	SAKL0H04884g	KLTH0D12870g
L.A1	A1LA01-090168g	1	-	764	764	LANO0H17392g	LAME0H05182g	ZYRO0A05830g	LAWA0E12530g	LACI0G05380g	LAFE0E06458g	LADA0C05248g	LAFA0E07954g	LAMI0A03862g	SAKL0H04862g	KLTH0D12892g
L.A1	A1LA01-090146g	1	-	765	765	LANO0H17414g	LAME0H05160g	ZYRO0A05808g	LAWA0E12486g	LACI0G05358g	LAFE0E06480g	LADA0C05226g	LAFA0E07932g	LAMI0A03840g	SAKL0H04840g	KLTH0D12914g
L.A1	A1LA01-090124g	1	-	766	766	LANO0H17436g	LAME0H05138g	ZYRO0A05786g	LAWA0E12464g	LACI0G05336g	LAFE0E06502g	LADA0C05204g	LAFA0E07910g	LAMI0A03818g	SAKL0H04818g	KLTH0D12936g
L.A1	A1LA01-090102g	1	+	767	767	LANO0H17458g	LAME0H05116g	ZYRO0A05764g	LAWA0E12728g	LACI0G05314g	LAFE0E06524g	LADA0C05182g	LAFA0E07888g	LAMI0A03796g	SAKL0H04796g	KLTH0D12958g
L.A1	A1LA01-090080g	1	-	768	768	LANO0H17480g	LAME0F01750g	ZYRO0A05742g	LAWA0E12772g	LACI0G05292g	LAFE0E06546g	LADA0G05072g	LAFA0D10462g	LAMI0A03774g	SAKL0H04730g	KLTH0D13002g
L.A1	A1LA01-090058g	1	-	769	769	LANO0H17502g	LAME0F01772g	ZYRO0G15796g	LAWA0E12816g	LACI0G05270g	LAFE0E06568g	LADA0G05094g	LAFA0D10440g	LAMI0A03752g	SAKL0H04532g	KLTH0D13046g
L.A1	A1LA01-090014g	1	-	770	770	LANO0H17546g	LAME0F01816g	ZYRO0G15774g	LAWA0E12860g	LACI0G05226g	LAFE0E06612g	LADA0G05138g	LAFA0D10396g	LAMI0A03708g	SAKL0H04488g	KLTH0D13090g
L.A1	A1LA01-089992g	1	+	771	771	LANO0H17568g	LAME0F01838g	ZYRO0G15752g	LAWA0E12882g	LACI0G05204g	LAFE0E06634g	LADA0G05160g	LAFA0D10374g	LAMI0A03686g	SAKL0H04466g	KLTH0D13112g
L.A1	A1LA01-089948g	1	-	772	772	LANO0H17612g	LAME0F01882g	ZYRO0G15840g	LAWA0E12926g	LACI0G05182g	LAFE0E06656g	LADA0G05204g	LAFA0D10330g	LAMI0A03642g	SAKL0H04422g	KLTH0D13156g
L.A1	A1LA01-089926g	1	+	773	773	LANO0H17634g	LAME0F01904g	ZYRO0G15708g	LAWA0E12970g	LACI0G05160g	LAFE0E06678g	LADA0G05226g	LAFA0D10308g	LAMI0A03598g	SAKL0H04400g	KLTH0D13178g
L.A1	A1LA01-089904g	1	-	774	774	LANO0H17656g	LAME0F01926g	ZYRO0G15686g	LAWA0E12992g	LACI0G05138g	LAFE0E06700g	LADA0G05248g	LAFA0D10286g	LAMI0A03576g	SAKL0H04378g	KLTH0D13200g
L.A1	A1LA01-089882g	1	+	775	775	LANO0H17678g	LAME0F01948g	ZYRO0G15664g	LAWA0E13014g	LACI0G05116g	LAFE0E06722g	LADA0G05270g	LAFA0D10264g	LAMI0A03554g	SAKL0H04356g	KLTH0D13222g
L.A1	A1LA01-089860g	1	+	776	776	LANO0H17700g	LAME0F01970g	ZYRO0B07832g	LAWA0E13036g	LACI0G05094g	LAFE0E06744g	LADA0G05292g	LAFA0D10242g	LAMI0A03532g	SAKL0H04334g	KLTH0D13244g
L.A1	A1LA01-089838g	1	+	777	777			ZYRO0B07810g		LACI0G05006g	LAFE0E06832g				SAKL0H04312g
L.A1	A1LA01-089816g	1	-	778	778	LANO0H17722g	LAME0F01992g	ZYRO0B07766g	LAWA0E13058g	LACI0G05072g	LAFE0E06766g	LADA0G05336g	LAFA0D10220g	LAMI0A03510g	SAKL0H04268g	KLTH0D13288g
L.A1	A1LA01-089794g	1	+	779	779	LANO0H17744g	LAME0F02014g	ZYRO0B07744g	LAWA0E13102g	LACI0G05050g	LAFE0E06788g	LADA0G05380g	LAFA0D10198g	LAMI0A03488g	SAKL0H04246g	KLTH0D13310g
L.A1	A1LA01-089772g	1	-	780	780	LANO0H17766g	LAME0F02036g	ZYRO0B07722g	LAWA0E13124g	LACI0G05028g	LAFE0E06810g	LADA0G05402g	LAFA0D10176g	LAMI0A03466g	SAKL0H04224g	KLTH0D13332g
L.A1	A1LA01-089750g	1	+	781	781	LANO0H17788g	LAME0F02058g	ZYRO0B07700g	LAWA0E13146g	LACI0G05006g	LAFE0E06832g	LADA0G05424g	LAFA0D10154g	LAMI0A03444g	SAKL0H04202g	KLTH0D13354g
L.A1	A1LA01-089728g	1	-	782	782	LANO0H17810g	LAME0F02080g	ZYRO0B07678g	LAWA0E13168g	LACI0G04984g	LAFE0E06854g	LADA0G05446g	LAFA0D10132g	LAMI0A03422g	SAKL0H04180g	KLTH0D13376g
L.A1	A1LA01-089706g	1	-	783	783	LANO0H17832g	LAME0F02102g	ZYRO0B07656g	LAWA0E13190g	LACI0G04962g	LAFE0E06876g	LADA0G05468g	LAFA0D10110g	LAMI0A03400g	SAKL0H04158g	KLTH0D13398g
L.A1	A1LA01-089684g	1	+	784	784	LANO0H17854g	LAME0F02124g	ZYRO0B07634g	LAWA0E13212g	LACI0G04940g	LAFE0E06898g	LADA0G05490g	LAFA0D10088g	LAMI0A03378g	SAKL0H04136g	KLTH0D13420g
L.A1	A1LA01-089662g	1	-	785	785	LANO0H17876g	LAME0F02146g	ZYRO0B07612g	LAWA0E13234g	LACI0G04918g	LAFE0E06920g	LADA0G05512g	LAFA0D10066g	LAMI0A03356g	SAKL0H04114g	KLTH0D13442g
L.A1	A1LA01-089640g	1	+	786	786	LANO0H17898g	LAME0F02168g	ZYRO0B07590g	LAWA0E13256g	LACI0G04896g	LAFE0E06942g	LADA0G05534g	LAFA0D10044g	LAMI0A03334g	SAKL0H04092g	KLTH0D13464g
L.A1	A1LA01-089618g	1	-	787	787			ZYRO0B07568g		LACI0G04874g	LAFE0E06964g			LAMI0A03312g	SAKL0H04070g
L.A1	A1LA01-089574g	1	+	788	788	LANO0H17942g	LAME0F02212g	ZYRO0B07546g	LAWA0E13300g	LACI0G04830g	LAFE0E07008g	LADA0G05578g	LAFA0D10000g	LAMI0A03268g	SAKL0H04026g	KLTH0D13508g
L.A1	A1LA01-089552g	1	+	789	789	LANO0H17964g	LAME0F02234g	ZYRO0B07524g		LACI0G04808g	LAFE0E07030g	LADA0E11782g	LAFA0D09978g	LAMI0A03246g	SAKL0H04004g	KLTH0D13530g
L.A1	A1LA01-089530g	1	-	790	790	LANO0H17986g	LAME0F02256g	ZYRO0B07502g	LAWA0E13344g	LACI0G04786g	LAFE0E07052g	LADA0E11804g	LAFA0D09956g	LAMI0A03224g	SAKL0H03982g	KLTH0D13552g
L.A1	A1LA01-089508g	1	+	791	791	LANO0H18008g	LAME0F02278g	ZYRO0B07480g	LAWA0E13366g	LACI0G04764g	LAFE0E07074g	LADA0E11826g	LAFA0D09934g	LAMI0A03202g	SAKL0H03960g	KLTH0D13574g
L.A1	A1LA01-089486g	1	+	792	792	LANO0H18030g	LAME0F02300g	ZYRO0B07458g	LAWA0E13388g	LACI0G04742g	LAFE0E07096g	LADA0E11848g	LAFA0D09912g	LAMI0A03180g	SAKL0H03938g	KLTH0D13596g
L.A1	A1LA01-089442g	1	+	793	793	LANO0H18052g	LAME0F02322g	ZYRO0B07436g	LAWA0E13410g	LACI0G04698g	LAFE0E07118g		LAFA0D09890g	LAMI0A03158g	SAKL0H03894g	KLTH0D13618g
L.A1	A1LA01-089420g	1	-	794	794	LANO0H18074g	LAME0F06942g	ZYRO0B07414g	LAWA0E13432g	LACI0G04676g	LAFE0E07140g	LADA0E11870g	LAFA0D09868g	LAMI0A03136g	SAKL0H03872g	KLTH0D13640g
L.A1	A1LA01-089398g	1	+	795	795	LANO0H18118g	LAME0F06964g	ZYRO0B07392g	LAWA0E13454g	LACI0G04654g	LAFE0E07162g	LADA0E11760g	LAFA0D09846g	LAMI0A03092g	SAKL0H03850g	KLTH0D13684g
L.A1	A1LA01-089376g	1	-	796	796	LANO0H18140g	LAME0F06986g	ZYRO0B07370g	LAWA0E13476g	LACI0G04632g	LAFE0E07184g	LADA0E11738g	LAFA0D09824g	LAMI0A03070g	SAKL0H03828g	KLTH0D13706g
L.A1	A1LA01-089354g	1	-	797	797	LANO0H18162g	LAME0F07008g	ZYRO0B07348g	LAWA0E13498g	LACI0G04610g	LAFE0E07206g	LADA0E11716g	LAFA0D09802g	LAMI0A03048g	SAKL0H03806g	KLTH0D13728g
L.A1	A1LA01-089332g	1	+	798	798	LANO0H18206g	LAME0F07030g	ZYRO0B07326g	LAWA0E13542g	LACI0G04588g	LAFE0E07228g	LADA0E11650g	LAFA0D09780g	LAMI0A03026g	SAKL0H03762g	KLTH0D13772g
L.A1	A1LA01-089310g	1	-	799	799	LANO0H18228g	LAME0F07052g	ZYRO0B07304g	LAWA0E13564g	LACI0G04566g	LAFE0E07250g	LADA0E11628g	LAFA0D09758g	LAMI0A03004g	SAKL0H03740g	KLTH0D13794g
L.A1	A1LA01-089288g	1	+	800	800	LANO0H18250g	LAME0F07074g	ZYRO0B07282g	LAWA0E13586g	LACI0G04544g	LAFE0E07272g	LADA0E11584g	LAFA0D09736g	LAMI0A02960g	SAKL0H03729g	KLTH0D13816g
L.A1	A1LA01-089266g	1	+	801	801	LANO0H18272g	LAME0F07096g	ZYRO0B07260g	LAWA0E13608g	LACI0G04522g	LAFE0E07294g	LADA0E11562g	LAFA0D09714g	LAMI0A02938g	SAKL0H03718g	KLTH0D13838g
L.A1	A1LA01-089244g	1	+	802	802	LANO0H18294g	LAME0F07118g	ZYRO0B07238g	LAWA0E13630g	LACI0G04500g	LAFE0E07316g	LADA0E12046g	LAFA0D09692g	LAMI0A02916g	SAKL0H03696g	KLTH0D13860g
L.A1	A1LA01-089222g	1	+	803	803			ZYRO0B07216g		LACI0G04478g	LAFE0E07338g				SAKL0H03652g
L.A1	A1LA01-089178g	1	+	804	804	LANO0H18338g	LAME0F07162g	ZYRO0B07150g	LAWA0E13696g	LACI0G04434g	LAFE0E07404g	LADA0E12090g	LAFA0D09648g	LAMI0A02872g	SAKL0H03454g	KLTH0D13948g
L.A1	A1LA01-089156g	1	-	805	805	LANO0H18360g	LAME0F07184g	ZYRO0B07128g	LAWA0E13718g	LACI0G04412g	LAFE0E07426g	LADA0E12112g	LAFA0D09626g	LAMI0A02850g	SAKL0H03432g	KLTH0D13970g
L.A1	A1LA01-089134g	1	-	806	806	LANO0H18382g	LAME0F07206g	ZYRO0B07106g	LAWA0E13740g	LACI0G04390g	LAFE0E07448g	LADA0E12134g	LAFA0D09604g	LAMI0A02828g	SAKL0H03410g	KLTH0D13992g
L.A1	A1LA01-089112g	1	+	807	807	LANO0H18404g	LAME0F07228g	ZYRO0B12056g	LAWA0E13762g	LACI0G04368g	LAFE0E07470g	LADA0E12156g	LAFA0D09582g	LAMI0A02806g	SAKL0H03388g	KLTH0D14014g
L.A1	A1LA01-089090g	1	+	808	808	LANO0H18426g	LAME0F07250g	ZYRO0B12078g		LACI0G04346g	LAFE0E07492g	LADA0E12178g	LAFA0D09560g	LAMI0A02784g	SAKL0H03366g	KLTH0D14036g
L.A1	A1LA01-089068g	1	-	809	809	LANO0H18448g	LAME0F07272g	ZYRO0B12100g	LAWA0E13784g	LACI0G04324g	LAFE0E07514g	LADA0E12200g	LAFA0D09538g	LAMI0A02762g	SAKL0H03344g	KLTH0D14058g
L.A1	A1LA01-089046g	1	+	810	810	LANO0H18470g	LAME0F07294g	ZYRO0B12122g	LAWA0E13806g	LACI0G04302g	LAFE0E07536g	LADA0E12222g	LAFA0D09516g	LAMI0A02740g	SAKL0H03322g	KLTH0D14080g
L.A1	A1LA01-089024g	1	-	811	811	LANO0H18492g	LAME0F07316g	ZYRO0B12144g		LACI0G04280g	LAFE0E07558g	LADA0E12244g	LAFA0D09494g	LAMI0A02718g	SAKL0H03300g	KLTH0D14102g
L.A1	A1LA01-089002g	1	+	812	812	LANO0H18514g	LAME0F07338g	ZYRO0B12166g	LAWA0E13850g	LACI0G04258g	LAFE0E07580g	LADA0E12266g	LAFA0D09472g	LAMI0A02696g	SAKL0H03278g	KLTH0D14124g
L.A1	A1LA01-088980g	1	-	813	813	LANO0H18536g	LAME0F07360g	ZYRO0B12188g	LAWA0E13872g	LACI0G04236g	LAFE0E07602g	LADA0E12288g	LAFA0D09450g	LAMI0A02674g	SAKL0H03256g	KLTH0D14146g
L.A1	A1LA01-088958g	1	-	814	814	LANO0H18558g	LAME0F07382g	ZYRO0B12210g	LAWA0E13894g	LACI0G04214g	LAFE0E07624g	LADA0E12310g	LAFA0D09428g	LAMI0A02652g	SAKL0H03234g	KLTH0D14168g
L.A1	A1LA01-088936g	1	+	815	815	LANO0H18580g	LAME0F07404g	ZYRO0B12232g	LAWA0E13916g	LACI0G04192g	LAFE0E07646g	LADA0E12332g	LAFA0D09406g	LAMI0A02630g	SAKL0H03212g	KLTH0D14190g
L.A1	A1LA01-088914g	1	-	816	816	LANO0H18602g	LAME0F07426g	ZYRO0B12254g	LAWA0E13938g	LACI0G04170g	LAFE0E07668g	LADA0E12354g	LAFA0D09384g	LAMI0A02608g	SAKL0H03190g	KLTH0D14212g
L.A1	A1LA01-088892g	1	-	817	817	LANO0H18624g	LAME0F07448g	ZYRO0B12276g	LAWA0G07052g	LACI0G04148g	LAFE0E07690g	LADA0E12376g	LAFA0D09362g	LAMI0A02586g	SAKL0H03168g	KLTH0D14234g
L.A1	A1LA01-088870g	1	+	818	818	LANO0H18646g	LAME0F07470g	ZYRO0B12298g	LAWA0G07030g	LACI0G04126g	LAFE0E07712g	LADA0E12398g	LAFA0D09340g	LAMI0A02564g	SAKL0H03146g	KLTH0D14256g
L.A1	A1LA01-088848g	1	-	819	819	LANO0H18668g	LAME0F07492g	ZYRO0B12320g	LAWA0G07008g	LACI0G04104g	LAFE0E07734g	LADA0E12420g	LAFA0D09318g	LAMI0A02542g	SAKL0H03124g	KLTH0D14278g
L.A1	A1LA01-088804g	1	+	820	820	LANO0H18712g	LAME0F07536g	ZYRO0B12364g	LAWA0G06964g	LACI0G04060g	LAFE0E07778g	LADA0E12464g	LAFA0D09274g	LAMI0A02498g	SAKL0H03080g	KLTH0D14322g
L.A1	A1LA01-088782g	1	-	821	821	LANO0H18734g	LAME0F07558g	ZYRO0B12386g	LAWA0G06942g	LACI0G04038g	LAFE0E07800g	LADA0E12486g	LAFA0D09252g	LAMI0A02476g	SAKL0H03058g	KLTH0D14344g
L.A1	A1LA01-088760g	1	+	822	822	LANO0G12310g	LAME0E07932g	ZYRO0B12408g	LAWA0G06920g	LACI0G04016g	LAFE0E07822g	LADA0H13674g	LAFA0G12244g	LAMI0A02454g	SAKL0H03036g	KLTH0D14366g
L.A1	A1LA01-088738g	1	+	823	823	LANO0G12288g	LAME0E07910g	ZYRO0B12430g	LAWA0G06898g	LACI0G03994g	LAFE0E07844g	LADA0H13652g	LAFA0G12222g	LAMI0A02432g	SAKL0H03014g	KLTH0D14388g
L.A1	A1LA01-088716g	1	-	824	824	LANO0G12266g	LAME0E07888g	ZYRO0B12452g	LAWA0G06876g	LACI0G03972g	LAFE0E07866g	LADA0H13630g	LAFA0G12200g	LAMI0A02410g	SAKL0H02992g	KLTH0D14410g
L.A1	A1LA01-088694g	1	+	825	825	LANO0G12244g	LAME0E07866g	ZYRO0B12474g	LAWA0G06854g	LACI0G03950g	LAFE0E07888g	LADA0H13608g	LAFA0G12178g	LAMI0A02388g	SAKL0H02970g	KLTH0D14432g
L.A1	A1LA01-088650g	1	-	826	826	LANO0G12200g	LAME0E07822g	ZYRO0B12496g	LAWA0G06810g	LACI0G03906g	LAFE0E07932g	LADA0H13564g	LAFA0G12134g	LAMI0A02344g	SAKL0H02860g	KLTH0D14476g
L.A1	A1LA01-088628g	1	+	827	827			ZYRO0B12518g							SAKL0H02838g
L.A1	A1LA01-088606g	1	-	828	828	LANO0G12178g	LAME0E07800g	ZYRO0B12540g	LAWA0G06788g	LACI0G03884g	LAFE0E07954g	LADA0H13542g	LAFA0G12112g	LAMI0A02300g	SAKL0H02816g	KLTH0D14498g
L.A1	A1LA01-088584g	1	+	829	829	LANO0G12156g	LAME0E07778g	ZYRO0B12562g	LAWA0G06766g	LACI0G03862g	LAFE0E07976g	LADA0H13520g	LAFA0G12090g	LAMI0A02278g	SAKL0H02794g	KLTH0D14520g
L.A1	A1LA01-088562g	1	-	830	830	LANO0G12134g	LAME0E07756g	ZYRO0B12584g	LAWA0G06744g	LACI0G03840g	LAFE0E07998g	LADA0H13498g	LAFA0G12068g	LAMI0A02256g	SAKL0H02772g	KLTH0D14564g
L.A1	A1LA01-088540g	1	-	831	831	LANO0G12112g	LAME0E07734g	ZYRO0B12606g	LAWA0G06722g	LACI0G03818g	LAFE0E08020g	LADA0H13476g	LAFA0G12046g	LAMI0A02234g	SAKL0H02750g	KLTH0D14586g
L.A1	A1LA01-088518g	1	+	832	832	LANO0G12090g	LAME0E07712g	ZYRO0B12628g	LAWA0G06700g	LACI0G03796g	LAFE0E08042g	LADA0H13454g	LAFA0G12024g	LAMI0A02212g	SAKL0H02728g	KLTH0D14608g
L.A1	A1LA01-088496g	1	-	833	833	LANO0G12068g	LAME0E07690g	ZYRO0B12650g	LAWA0G06678g	LACI0G03774g	LAFE0E08064g	LADA0H13432g	LAFA0G12002g	LAMI0A02190g	SAKL0H02706g	KLTH0D14630g
L.A1	A1LA01-082534g	1	-	834	834	LANO0G12046g	LAME0E07668g	ZYRO0B12672g	LAWA0G06656g	LACI0G03752g	LAFE0E08086g	LADA0H13410g	LAFA0G11980g	LAMI0A02168g	SAKL0G15686g	KLTH0D14652g
L.A1	A1LA01-082556g	1	+	835	835	LANO0G12024g	LAME0E07646g	ZYRO0B12694g	LAWA0G06634g	LACI0G03730g	LAFE0E08108g	LADA0H13388g	LAFA0G11958g	LAMI0A02146g	SAKL0G15708g	KLTH0D14674g
L.A1	A1LA01-082578g	1	-	836	836	LANO0G12002g	LAME0E07602g	ZYRO0B12716g	LAWA0G06612g	LACI0G03708g	LAFE0E08130g	LADA0H13366g	LAFA0G11936g	LAMI0A02124g	SAKL0G15730g	KLTH0D14696g
L.A1	A1LA01-082600g	1	+	837	837	LANO0G11980g	LAME0E07580g	ZYRO0B12738g	LAWA0G06590g	LACI0G03686g	LAFE0E08152g	LADA0H13344g	LAFA0G11914g	LAMI0A02102g	SAKL0G15752g	KLTH0D14718g
L.A1	A1LA01-082622g	1	+	838	838	LANO0G11958g	LAME0E07558g	ZYRO0B12760g	LAWA0G06568g	LACI0G03664g	LAFE0E08174g	LADA0H13322g	LAFA0G11892g	LAMI0A02080g	SAKL0G15774g	KLTH0D14740g
L.A1	A1LA01-082644g	1	-	839	839	LANO0G11936g	LAME0E07536g	ZYRO0B12782g		LACI0G03642g	LAFE0E08196g	LADA0H13300g	LAFA0G11870g	LAMI0A02058g	SAKL0G15796g	KLTH0D14762g
L.A1	A1LA01-082666g	1	+	840	840	LANO0G11914g	LAME0E07514g	ZYRO0B12804g	LAWA0G06480g	LACI0G03620g	LAFE0E08218g	LADA0H13278g	LAFA0G11848g	LAMI0A02036g	SAKL0G15818g	KLTH0D14784g
L.A1	A1LA01-082688g	1	+	841	841	LANO0G11892g	LAME0E07492g	ZYRO0B12826g		LACI0G03598g	LAFE0E08240g	LADA0H13256g	LAFA0G11826g	LAMI0A02014g	SAKL0G15840g	KLTH0D14806g
L.A1	A1LA01-082710g	1	-	842	842	LANO0G11870g	LAME0E07470g	ZYRO0B12870g	LAWA0G06502g	LACI0G03576g	LAFE0E08262g	LADA0H13234g	LAFA0G11804g	LAMI0A01992g	SAKL0G15884g	KLTH0D14850g
L.A1	A1LA01-082732g	1	+	843	843	LANO0G11848g	LAME0E07448g	ZYRO0B12892g		LACI0G03554g	LAFE0E08284g	LADA0H13212g	LAFA0G11782g	LAMI0A01970g	SAKL0G15906g	KLTH0D14872g
L.A1	A1LA01-082754g	1	+	844	844	LANO0G11826g	LAME0E07426g	ZYRO0B12914g	LAWA0G06436g	LACI0G03532g	LAFE0E08306g	LADA0H13190g	LAFA0G11760g	LAMI0A01948g	SAKL0G15928g	KLTH0D14894g
L.A1	A1LA01-082776g	1	-	845	845	LANO0G11804g	LAME0E07404g	ZYRO0B12936g	LAWA0G06414g	LACI0G03510g	LAFE0E08328g	LADA0H13168g	LAFA0G11738g	LAMI0A01926g	SAKL0G15950g	KLTH0D14916g
L.A1	A1LA01-082798g	1	+	846	846	LANO0G11782g	LAME0E07382g	ZYRO0B12958g	LAWA0G06392g	LACI0G03488g	LAFE0E08350g	LADA0H13146g	LAFA0G11716g	LAMI0A01904g	SAKL0G15972g	KLTH0D14938g
L.A1	A1LA01-082820g	1	-	847	847	LANO0G11760g	LAME0E07360g	ZYRO0B12980g	LAWA0G06370g	LACI0G03466g	LAFE0E08372g	LADA0H13124g	LAFA0G11694g	LAMI0A01882g	SAKL0G15994g	KLTH0D14960g
L.A1	A1LA01-082842g	1	+	848	848	LANO0G11738g	LAME0E07338g	ZYRO0B13002g	LAWA0G06348g	LACI0G03444g	LAFE0E08394g	LADA0H13102g	LAFA0G11672g	LAMI0A01838g	SAKL0G16016g	KLTH0D14982g
L.A1	A1LA01-082886g	1	-	849	849	LANO0G11694g	LAME0E07294g	ZYRO0B13024g	LAWA0G06304g	LACI0G03400g	LAFE0E08438g	LADA0H13058g	LAFA0G11628g	LAMI0A01794g	SAKL0G16060g	KLTH0D15026g
L.A1	A1LA01-082908g	1	+	850	850	LANO0G11672g	LAME0E07272g	ZYRO0B13046g	LAWA0G06282g	LACI0G03378g	LAFE0E08460g	LADA0H13036g	LAFA0G11606g	LAMI0A01772g	SAKL0G16082g	KLTH0D15048g
L.A1	A1LA01-082930g	1	-	851	851	LANO0G11650g	LAME0E07250g	ZYRO0B13222g	LAWA0G06260g	LACI0G03356g	LAFE0E08482g	LADA0H13014g	LAFA0G11584g	LAMI0A01750g	SAKL0G16104g	KLTH0D15070g
L.A1	A1LA01-082974g	1	-	852	852	LANO0G11628g	LAME0E07228g	ZYRO0B13090g	LAWA0G06238g	LACI0G03312g	LAFE0E08548g	LADA0H12992g	LAFA0G11562g	LAMI0A01728g	SAKL0G16148g	KLTH0D15092g
L.A1	A1LA01-082996g	1	-	853	853	LANO0G11606g	LAME0E07206g	ZYRO0B13112g	LAWA0G06216g	LACI0G03290g	LAFE0E08570g	LADA0H12970g	LAFA0G11540g	LAMI0A01706g	SAKL0G16170g	KLTH0D15114g
L.A1	A1LA01-083018g	1	-	854	854	LANO0G11584g	LAME0E07184g	ZYRO0B13134g	LAWA0G06194g	LACI0G03268g	LAFE0E08592g	LADA0H12948g	LAFA0G11518g	LAMI0A01684g	SAKL0G16192g	KLTH0D15136g
L.A1	A1LA01-083040g	1	+	855	855	LANO0G11562g	LAME0E07162g	ZYRO0B13156g	LAWA0G06172g	LACI0G03246g	LAFE0E08614g	LADA0H12926g	LAFA0G11496g	LAMI0A01662g	SAKL0G16214g	KLTH0D15158g
L.A1	A1LA01-083084g	1	-	856	856	LANO0G11518g	LAME0E07118g	ZYRO0B13200g		LACI0G03202g	LAFE0E08658g	LADA0H12882g	LAFA0G11452g	LAMI0A01618g	SAKL0G16258g	KLTH0D15224g
L.A1	A1LA01-083106g	1	+	857	857	LANO0G11496g	LAME0E07096g	ZYRO0B13222g	LAWA0G06084g	LACI0G03180g	LAFE0E08680g	LADA0C04434g	LAFA0G11408g	LAMI0A01596g	SAKL0G16280g	KLTH0D15246g
L.A1	A1LA01-083128g	1	+	858	858	LANO0G11474g	LAME0E07074g	ZYRO0B13288g	LAWA0G06040g	LACI0G03158g	LAFE0E08702g	LADA0C04412g	LAFA0G11386g	LAMI0A01574g	SAKL0G16302g	KLTH0D15268g
L.A1	A1LA01-083150g	1	-	859	859	LANO0G11452g	LAME0E07052g	ZYRO0B13310g	LAWA0G06018g	LACI0G03136g	LAFE0E08724g	LADA0C04390g	LAFA0G11364g	LAMI0A01552g	SAKL0G16324g	KLTH0D15290g
L.A1	A1LA01-083172g	1	-	860	860			ZYRO0B13354g	LAWA0D03070g	LACI0G03114g	LAFE0A03026g			LAMI0A01530g	SAKL0G16390g	KLTH0D15334g
L.A1	A1LA01-083194g	1	+	861	861	LANO0G12332g	LAME0E07954g	ZYRO0B13332g	LAWA0D03048g	LACI0G03092g	LAFE0A03004g	LADA0H13696g	LAFA0G12266g	LAMI0A01508g	SAKL0G16412g	KLTH0D15356g
L.A1	A1LA01-083216g	1	+	862	862	LANO0G12354g	LAME0E07976g	ZYRO0B13398g	LAWA0D03026g	LACI0G03070g	LAFE0A02982g			LAMI0H02102g	SAKL0G16456g	KLTH0D15378g
L.A1	A1LA01-083238g	1	-	863	863	LANO0G12376g	LAME0E07998g	ZYRO0B13420g	LAWA0D03004g	LACI0G03048g	LAFE0A02960g	LADA0H13718g	LAFA0G12288g	LAMI0H02080g	SAKL0G16478g	KLTH0D15400g
L.A1	A1LA01-083260g	1	-	864	864	LANO0G12398g	LAME0E08020g	ZYRO0B13442g	LAWA0D02982g	LACI0G03026g	LAFE0A02938g	LADA0H13740g	LAFA0G12310g	LAMI0H02058g	SAKL0G16500g	KLTH0D15422g
L.A1	A1LA01-083282g	1	+	865	865	LANO0G12420g	LAME0E08042g	ZYRO0B13222g	LAWA0D02960g	LACI0G03004g	LAFE0A02916g	LADA0H13762g	LAFA0G12332g	LAMI0H02036g	SAKL0G16522g	KLTH0D15444g
L.A1	A1LA01-083304g	1	-	866	866	LANO0G12442g	LAME0E08064g	ZYRO0B13486g	LAWA0D02938g	LACI0G02982g	LAFE0A02894g	LADA0H13784g	LAFA0G12354g	LAMI0H02014g	SAKL0G16555g	KLTH0D15477g
L.A1	A1LA01-083326g	1	+	867	867	LANO0G12464g	LAME0E08086g	ZYRO0B13508g	LAWA0D02916g	LACI0G02960g	LAFE0A02872g	LADA0H13806g	LAFA0G12574g	LAMI0H01992g	SAKL0G16588g	KLTH0D15510g
L.A1	A1LA01-083348g	1	+	868	868	LANO0G12486g	LAME0E08108g	ZYRO0B13530g	LAWA0D02894g	LACI0G02938g	LAFE0A02850g	LADA0H13828g	LAFA0G12508g	LAMI0H01970g	SAKL0G16610g	KLTH0D15532g
L.A1	A1LA01-083370g	1	+	869	869	LANO0G12508g	LAME0E08130g	ZYRO0B13552g	LAWA0D02872g	LACI0G02916g	LAFE0A02828g	LADA0H13916g	LAFA0G12486g	LAMI0H01948g	SAKL0G16632g	KLTH0D15554g
L.A1	A1LA01-083392g	1	+	870	870	LANO0G12530g	LAME0E08152g	ZYRO0B13574g		LACI0G02894g	LAFE0A02806g	LADA0H13938g	LAFA0G12464g	LAMI0H01926g	SAKL0G16654g	KLTH0D15576g
L.A1	A1LA01-083436g	1	+	871	871	LANO0G12574g	LAME0E08196g	ZYRO0B13596g	LAWA0D02784g	LACI0G02850g	LAFE0A02762g	LADA0H13982g	LAFA0G12442g	LAMI0H01882g	SAKL0G16698g	KLTH0D15620g
L.A1	A1LA01-083458g	1	-	872	872	LANO0G12596g	LAME0E08218g	ZYRO0B13618g		LACI0G02828g	LAFE0A02740g	LADA0H14004g	LAFA0G12420g	LAMI0H01860g	SAKL0G16720g	KLTH0D15642g
L.A1	A1LA01-083480g	1	+	873	873	LANO0G12618g	LAME0E08240g	ZYRO0B13640g	LAWA0D02740g	LACI0G02806g	LAFE0A02718g	LADA0H14026g	LAFA0G12398g	LAMI0H01838g	SAKL0G16742g	KLTH0D15664g
L.A1	A1LA01-083502g	1	-	874	874	LANO0G12640g	LAME0E08262g	ZYRO0B13662g	LAWA0D02718g	LACI0G02784g	LAFE0A02696g	LADA0H14048g	LAFA0G12376g	LAMI0H01816g	SAKL0G16764g	KLTH0D15686g
L.A1	A1LA01-083524g	1	+	875	875	LANO0G12662g	LAME0E08284g	ZYRO0B13684g	LAWA0D02696g	LACI0G02762g	LAFE0A02674g	LADA0H14070g	LAFA0G12596g	LAMI0H01794g	SAKL0G16786g	KLTH0D15708g
L.A1	A1LA01-083546g	1	+	876	876			ZYRO0B13728g		LACI0G02740g	LAFE0A02630g			LAMI0H01772g	SAKL0G16852g
L.A1	A1LA01-083568g	1	+	877	877	LANO0G12684g	LAME0E08306g	ZYRO0B13750g		LACI0G02718g	LAFE0A02608g	LADA0H14114g	LAFA0G12618g	LAMI0H01750g	SAKL0G16874g	KLTH0D15752g
L.A1	A1LA01-083590g	1	+	878	878	LANO0G12706g	LAME0E08328g	ZYRO0B13772g	LAWA0D02630g	LACI0G02696g	LAFE0A02586g	LADA0H14136g	LAFA0G12640g	LAMI0H01728g	SAKL0G16896g	KLTH0D15774g
L.A1	A1LA01-083612g	1	-	879	879	LANO0G12728g	LAME0E08350g	ZYRO0B13794g	LAWA0D02608g	LACI0G02674g	LAFE0A02564g	LADA0H14158g	LAFA0G12662g	LAMI0H01706g	SAKL0G16918g	KLTH0D15796g
L.A1	A1LA01-083634g	1	+	880	880	LANO0G12750g	LAME0E08372g	ZYRO0B13816g	LAWA0D02586g	LACI0G02652g	LAFE0A02542g	LADA0H14180g	LAFA0G12684g	LAMI0H01684g	SAKL0G16940g	KLTH0D15818g
L.A1	A1LA01-083656g	1	+	881	881	LANO0G12772g	LAME0E08394g	ZYRO0B13838g	LAWA0D02564g	LACI0G02630g	LAFE0A02520g	LADA0H14202g	LAFA0G12706g	LAMI0H01662g	SAKL0G16962g	KLTH0D15840g
L.A1	A1LA01-083678g	1	+	882	882	LANO0G12794g	LAME0E08416g	ZYRO0B13860g	LAWA0D02542g	LACI0G02608g	LAFE0A02498g	LADA0H14224g	LAFA0G12728g	LAMI0H01640g	SAKL0G16984g	KLTH0D15862g
L.A1	A1LA01-083700g	1	-	883	883	LANO0G12816g	LAME0E08438g	ZYRO0B13882g	LAWA0D02520g	LACI0G02586g	LAFE0A02476g	LADA0H14246g	LAFA0G12750g	LAMI0H01618g	SAKL0G17006g	KLTH0D15884g
L.A1	A1LA01-083722g	1	+	884	884	LANO0G12838g	LAME0E08460g	ZYRO0B13904g	LAWA0D02498g	LACI0G02564g	LAFE0A02454g	LADA0H14268g	LAFA0G12772g	LAMI0H01596g	SAKL0G17050g	KLTH0D15906g
L.A1	A1LA01-083744g	1	-	885	885	LANO0G12860g	LAME0E08482g	ZYRO0B13948g	LAWA0D02476g	LACI0G02542g	LAFE0A02432g	LADA0H14290g	LAFA0G12794g	LAMI0H01574g	SAKL0G17094g	KLTH0D15950g
L.A1	A1LA01-083766g	1	+	886	886	LANO0G12882g	LAME0E08504g	ZYRO0B13970g	LAWA0D02454g	LACI0G02520g	LAFE0A02410g	LADA0H14312g	LAFA0G12816g	LAMI0H01552g	SAKL0G17116g	KLTH0D15972g
L.A1	A1LA01-083788g	1	-	887	887	LANO0G12904g	LAME0E08526g	ZYRO0B13992g	LAWA0D02432g	LACI0G02498g	LAFE0A02388g	LADA0H14334g	LAFA0G12838g	LAMI0H01530g	SAKL0G17138g	KLTH0D15994g
L.A1	A1LA01-083810g	1	-	888	888	LANO0G12926g	LAME0E08548g	ZYRO0B14014g	LAWA0D02410g	LACI0G02476g	LAFE0A02366g	LADA0H14356g	LAFA0G12860g	LAMI0H01508g	SAKL0G17160g	KLTH0D16016g
L.A1	A1LA01-083832g	1	+	889	889	LANO0G12970g	LAME0E08570g	ZYRO0B14058g	LAWA0D02388g	LACI0G02454g	LAFE0A02300g	LADA0H14378g	LAFA0G12926g	LAMI0H01486g	SAKL0G17182g	KLTH0D16038g
L.A1	A1LA01-083876g	1	+	890	890	LANO0G13014g	LAME0E08614g	ZYRO0B14080g	LAWA0D02300g	LACI0G02410g	LAFE0A02256g	LADA0H14422g	LAFA0G12970g	LAMI0H01442g	SAKL0G17248g	KLTH0D16060g
L.A1	A1LA01-083898g	1	-	891	891	LANO0G13036g	LAME0E08636g	ZYRO0B14102g		LACI0G02388g	LAFE0A02234g	LADA0H14444g	LAFA0G12992g	LAMI0H01420g	SAKL0G17270g	KLTH0D16082g
L.A1	A1LA01-083920g	1	+	892	892	LANO0G13058g	LAME0E08658g	ZYRO0B14124g	LAWA0D02256g	LACI0G02366g	LAFE0A02212g	LADA0H14466g	LAFA0G13014g	LAMI0H01398g	SAKL0G17292g	KLTH0D16104g
L.A1	A1LA01-083942g	1	-	893	893	LANO0G13080g	LAME0E08680g	ZYRO0B14146g	LAWA0D02234g	LACI0G02344g	LAFE0A02190g	LADA0H14488g	LAFA0G13036g	LAMI0H01376g	SAKL0G17314g	KLTH0D16126g
L.A1	A1LA01-083964g	1	+	894	894	LANO0G13102g	LAME0E08702g	ZYRO0B14168g		LACI0G02322g	LAFE0A02168g	LADA0H14510g	LAFA0G13058g	LAMI0H01354g	SAKL0G17336g	KLTH0D16148g
L.A1	A1LA01-083986g	1	-	895	895	LANO0G13124g	LAME0E08724g	ZYRO0B14190g	LAWA0D02190g	LACI0G02300g	LAFE0A02146g	LADA0H14532g	LAFA0G13080g	LAMI0H01332g	SAKL0G17358g	KLTH0D16170g
L.A1	A1LA01-084008g	1	+	896	896	LANO0G13146g	LAME0E08746g	ZYRO0B14212g	LAWA0D02168g	LACI0G02278g	LAFE0A02124g	LADA0H14554g	LAFA0G13102g	LAMI0H01310g	SAKL0G17380g	KLTH0D16192g
L.A1	A1LA01-084030g	1	-	897	897	LANO0G13168g	LAME0E08768g	ZYRO0B14234g	LAWA0D02146g	LACI0G02256g	LAFE0A02102g	LADA0H14576g	LAFA0G13124g	LAMI0H01288g	SAKL0G17402g	KLTH0D16214g
L.A1	A1LA01-084052g	1	+	898	898	LANO0G13190g	LAME0E08790g	ZYRO0B14256g	LAWA0D02124g	LACI0G02234g	LAFE0A02080g	LADA0H14598g	LAFA0G13146g	LAMI0H01266g	SAKL0G17424g	KLTH0D16236g
L.A1	A1LA01-084074g	1	-	899	899	LANO0G13212g	LAME0E08812g	ZYRO0B14278g	LAWA0D02102g	LACI0G02212g	LAFE0A02058g	LADA0H14620g	LAFA0G13168g	LAMI0H01244g	SAKL0G17446g	KLTH0D16258g
L.A1	A1LA01-084096g	1	+	900	900	LANO0G13234g	LAME0E08834g	ZYRO0B14300g	LAWA0D02080g	LACI0G02190g	LAFE0A02036g	LADA0H14642g	LAFA0G13190g	LAMI0H01222g	SAKL0G17468g	KLTH0D16280g
L.A1	A1LA01-084118g	1	+	901	901	LANO0G13256g	LAME0E08856g	ZYRO0B14322g	LAWA0D02058g	LACI0G02168g	LAFE0A02014g	LADA0H14664g	LAFA0G13212g	LAMI0H01200g	SAKL0G17490g	KLTH0D16302g
L.A1	A1LA01-084140g	1	+	902	902	LANO0G13278g	LAME0E08878g	ZYRO0B14344g	LAWA0D02036g	LACI0G02146g	LAFE0A01992g	LADA0H14686g	LAFA0G13234g	LAMI0H01178g	SAKL0G17512g	KLTH0D16324g
L.A1	A1LA01-084162g	1	+	903	903	LANO0G13300g	LAME0E08900g	ZYRO0B14366g	LAWA0D02014g	LACI0G02124g	LAFE0A01970g	LADA0H14708g	LAFA0G13256g		SAKL0G17534g	KLTH0D16346g
L.A1	A1LA01-084184g	1	-	904	904	LANO0G13322g	LAME0E08922g	ZYRO0B14410g	LAWA0D01970g	LACI0G02080g	LAFE0A01926g	LADA0H14730g	LAFA0G13278g	LAMI0H01134g	SAKL0G17556g	KLTH0D16390g
L.A1	A1LA01-084206g	1	-	905	905	LANO0G13344g	LAME0E08944g	ZYRO0B14432g		LACI0G02058g	LAFE0A01904g	LADA0H14752g	LAFA0G13300g	LAMI0H01112g	SAKL0G17578g	KLTH0D16412g
L.A1	A1LA01-084228g	1	-	906	906	LANO0G13366g	LAME0E08966g	ZYRO0B14454g	LAWA0D01926g	LACI0G02036g	LAFE0A01882g	LADA0H14774g	LAFA0G13322g	LAMI0H01090g	SAKL0G17600g	KLTH0D16434g
L.A1	A1LA01-084250g	1	-	907	907	LANO0G13388g	LAME0E08988g	ZYRO0B14476g	LAWA0D01904g	LACI0G02014g	LAFE0A01860g	LADA0H14796g	LAFA0G13344g		SAKL0G17622g	KLTH0D16456g
L.A1	A1LA01-084316g	1	+	908	908	LANO0G13454g	LAME0E09076g	ZYRO0B14520g		LACI0G01948g	LAFE0A01750g	LADA0H14862g	LAFA0G13410g	LAMI0H01046g	SAKL0G17710g	KLTH0D16522g
L.A1	A1LA01-084338g	1	-	909	909	LANO0G13498g	LAME0E09120g	ZYRO0B14542g	LAWA0D01860g	LACI0G01904g	LAFE0A01706g	LADA0H14906g	LAFA0G13432g	LAMI0H00980g	SAKL0G17732g	KLTH0D16566g
L.A1	A1LA01-084382g	1	-	910	910	LANO0G13542g	LAME0E09164g	ZYRO0B14564g	LAWA0D01816g	LACI0G01860g	LAFE0A01662g	LADA0H14950g	LAFA0G13476g	LAMI0H00958g	SAKL0G17776g	KLTH0D16610g
L.A1	A1LA01-084404g	1	+	911	911	LANO0G13564g	LAME0E09186g	ZYRO0B14586g	LAWA0D01794g	LACI0G01838g	LAFE0A01640g	LADA0H14972g	LAFA0G13498g	LAMI0G09472g	SAKL0G17798g	KLTH0D16632g
L.A1	A1LA01-084426g	1	+	912	912	LANO0G13586g	LAME0E09208g	ZYRO0B14630g	LAWA0D01772g	LACI0G01816g	LAFE0A01618g	LADA0H14994g	LAFA0G13520g	LAMI0G09450g	SAKL0G17820g	KLTH0D16654g
L.A1	A1LA01-084448g	1	+	913	913	LANO0G13608g	LAME0E09230g	ZYRO0B14652g	LAWA0D01750g	LACI0G01794g	LAFE0A01596g	LADA0H15016g	LAFA0G13542g	LAMI0G09428g	SAKL0G17842g	KLTH0D16698g
L.A1	A1LA01-084470g	1	+	914	914	LANO0B01640g	LAME0A04170g	ZYRO0B14674g	LAWA0D01684g	LACI0G01772g	LAFE0A01574g	LADA0A07470g	LAFA0A04896g	LAMI0G09406g	SAKL0G17864g	KLTH0D16764g
L.A1	A1LA01-084492g	1	+	915	915	LANO0B01618g	LAME0A04192g	ZYRO0B14696g	LAWA0D01640g	LACI0G01750g	LAFE0A01552g	LADA0A07492g	LAFA0A04918g	LAMI0G09384g	SAKL0G17886g	KLTH0D16786g
L.A1	A1LA01-084514g	1	+	916	916	LANO0B01552g	LAME0A04214g	ZYRO0B14718g	LAWA0D01618g	LACI0G01706g	LAFE0A01508g	LADA0A07514g	LAFA0A04940g	LAMI0G09362g	SAKL0G17908g	KLTH0D16852g
L.A1	A1LA01-084536g	1	-	917	917	LANO0B01530g	LAME0A04236g	ZYRO0B14740g	LAWA0D01596g	LACI0G01684g	LAFE0A01486g	LADA0A07536g	LAFA0A04962g	LAMI0G09340g	SAKL0G17930g	KLTH0D16874g
L.A1	A1LA01-084558g	1	-	918	918	LANO0B01508g	LAME0A04258g	ZYRO0B14784g	LAWA0D01574g	LACI0G01662g	LAFE0A01464g	LADA0A07558g	LAFA0A04984g	LAMI0G09318g	SAKL0G17952g	KLTH0D16896g
L.A1	A1LA01-084580g	1	-	919	919	LANO0B01486g	LAME0A04280g	ZYRO0B14806g	LAWA0D01552g	LACI0G01640g	LAFE0A01442g	LADA0A07580g	LAFA0A05006g	LAMI0G09296g	SAKL0G17974g	KLTH0D16918g
L.A1	A1LA01-084602g	1	-	920	920	LANO0B01464g	LAME0A04302g	ZYRO0B14828g	LAWA0D00364g	LACI0G01618g	LAFE0A01420g	LADA0A07602g	LAFA0A05028g	LAMI0G09274g	SAKL0G17996g	KLTH0D18128g
L.A1	A1LA01-084624g	1	-	921	921	LANO0B01442g	LAME0A04324g	ZYRO0B14850g	LAWA0D00386g	LACI0G01596g	LAFE0A01398g	LADA0A07624g	LAFA0A04060g	LAMI0G09252g	SAKL0G18018g	KLTH0D16808g
L.A1	A1LA01-084646g	1	-	922	922	LANO0B01420g	LAME0A04346g	ZYRO0B14872g	LAWA0D00408g	LACI0G01574g	LAFE0A01376g	LADA0A07646g	LAFA0A04038g	LAMI0G09230g	SAKL0G18040g	KLTH0D18084g
L.A1	A1LA01-084668g	1	-	923	923	LANO0B01596g	LAME0A04368g	ZYRO0B14894g	LAWA0D00232g	LACI0G01552g	LAFE0A01354g	LADA0A07668g	LAFA0A04016g	LAMI0G09208g	SAKL0G18062g	KLTH0D18062g
L.A1	A1LA01-084734g	1	-	924	924	LANO0B01310g	LAME0A04434g	ZYRO0B14916g	LAWA0D00496g	LACI0G01486g	LAFE0A01310g	LADA0A07734g	LAFA0A03950g	LAMI0G09164g	SAKL0G18106g	KLTH0D17996g
L.A1	A1LA01-084756g	1	-	925	925	LANO0B01288g	LAME0A04456g	ZYRO0B14960g	LAWA0D00518g	LACI0G01464g	LAFE0A01288g	LADA0A07756g	LAFA0A03928g	LAMI0G09142g	SAKL0G18128g	KLTH0D17974g
L.A1	A1LA01-084778g	1	+	926	926	LANO0B01266g	LAME0G17524g	ZYRO0B08316g	LAWA0D00540g	LACI0G01442g	LAFE0A01266g	LADA0A07778g	LAFA0F10264g	LAMI0C00826g	SAKL0G18150g	KLTH0D17952g
L.A1	A1LA01-084800g	1	-	927	927	LANO0B01244g	LAME0G17546g	ZYRO0B08338g	LAWA0D00562g	LACI0G01420g	LAFE0A01244g	LADA0A07800g	LAFA0F10286g	LAMI0C00848g	SAKL0G18172g	KLTH0D17930g
L.A1	A1LA01-084822g	1	+	928	928	LANO0B01222g	LAME0G17590g	ZYRO0B08360g	LAWA0D00584g	LACI0G01398g	LAFE0A01222g	LADA0A07822g	LAFA0F10330g	LAMI0C00870g	SAKL0G18194g	KLTH0D17908g
L.A1	A1LA01-084844g	1	-	929	929	LANO0B01200g	LAME0G17612g	ZYRO0B08382g	LAWA0D00606g	LACI0G01376g	LAFE0A01200g	LADA0A07844g	LAFA0F10352g	LAMI0C00892g	SAKL0G18216g	KLTH0D17886g
L.A1	A1LA01-084866g	1	+	930	930	LANO0B01178g	LAME0G17634g	ZYRO0B08404g	LAWA0D00628g	LACI0G01354g	LAFE0A01178g	LADA0A07866g	LAFA0F10374g	LAMI0C00914g	SAKL0G18238g	KLTH0D17864g
L.A1	A1LA01-084888g	1	-	931	931	LANO0B01156g	LAME0G17656g	ZYRO0B08426g	LAWA0D00650g	LACI0G01332g	LAFE0A01156g	LADA0A07888g	LAFA0F10396g	LAMI0C00936g	SAKL0G18260g	KLTH0D17842g
L.A1	A1LA01-084910g	1	+	932	932	LANO0B01134g	LAME0G17678g	ZYRO0B08448g	LAWA0D00694g	LACI0G01310g	LAFE0A01134g	LADA0A07910g	LAFA0F10418g	LAMI0C00958g	SAKL0G18304g	KLTH0D17798g
L.A1	A1LA01-084954g	1	+	933	933	LANO0B01090g	LAME0G17722g	ZYRO0B08492g	LAWA0D00738g	LACI0G01266g	LAFE0A01090g	LADA0A07954g	LAFA0F10462g	LAMI0C01002g	SAKL0G18348g	KLTH0D17754g
L.A1	A1LA01-084976g	1	+	934	934	LANO0B01068g	LAME0G17744g	ZYRO0B08514g	LAWA0D00760g	LACI0G01244g	LAFE0A01068g	LADA0A07976g	LAFA0F10484g	LAMI0C03862g	SAKL0G18370g	KLTH0D17732g
L.A1	A1LA01-085020g	1	-	935	935	LANO0B01024g	LAME0G17788g	ZYRO0B08536g	LAWA0D00804g	LACI0G01200g	LAFE0A01024g	LADA0A08020g	LAFA0F10528g	LAMI0C03818g	SAKL0G18414g	KLTH0D17688g
L.A1	A1LA01-085042g	1	+	936	936	LANO0B01002g	LAME0G17810g	ZYRO0B08558g	LAWA0D00848g	LACI0G01178g	LAFE0A00980g	LADA0A08042g	LAFA0F10550g	LAMI0C03796g	SAKL0G18458g	KLTH0D17644g
L.A1	A1LA01-085064g	1	-	937	937	LANO0B00980g	LAME0G17832g	ZYRO0B08580g	LAWA0D00870g	LACI0G01156g	LAFE0A00958g	LADA0A08064g	LAFA0F10572g	LAMI0C03774g	SAKL0G18480g	KLTH0D17622g
L.A1	A1LA01-085086g	1	+	938	938	LANO0B00958g	LAME0G17854g	ZYRO0B08602g	LAWA0D00892g	LACI0G01134g	LAFE0A00936g	LADA0A08086g	LAFA0F10594g	LAMI0C03752g	SAKL0G18502g	KLTH0D17600g
L.A1	A1LA01-085108g	1	-	939	939	LANO0B00936g	LAME0G17876g	ZYRO0B08624g	LAWA0D00914g	LACI0G01112g	LAFE0A00914g	LADA0A08108g	LAFA0F10616g	LAMI0C03730g	SAKL0G18524g	KLTH0D17578g
L.A1	A1LA01-085152g	1	-	940	940	LANO0B00892g	LAME0G17920g	ZYRO0B08646g	LAWA0D00958g	LACI0G01068g	LAFE0A00870g	LADA0A08152g	LAFA0F10660g	LAMI0C03686g	SAKL0G18568g	KLTH0D17534g
L.A1	A1LA01-085174g	1	-	941	941	LANO0B00870g	LAME0G17942g	ZYRO0B08668g	LAWA0D00980g	LACI0G01046g	LAFE0A00848g	LADA0A08174g	LAFA0F10682g	LAMI0C03664g	SAKL0G18590g	KLTH0D17512g
L.A1	A1LA01-085196g	1	-	942	942			ZYRO0B08690g				LADA0A07954g	LAFA0F10682g		SAKL0G18612g
L.A1	A1LA01-085218g	1	+	943	943	LANO0B00848g	LAME0E13344g	ZYRO0B08712g	LAWA0D01002g	LACI0G01024g	LAFE0A00826g	LADA0A08196g	LAFA0F06128g	LAMI0C03642g	SAKL0G18634g	KLTH0D17490g
L.A1	A1LA01-085240g	1	+	944	944	LANO0B00826g	LAME0E13366g	ZYRO0B08734g	LAWA0D01024g	LACI0G01002g	LAFE0A00804g	LADA0A08218g	LAFA0F06150g	LAMI0C03620g	SAKL0G18656g	KLTH0D17468g
L.A1	A1LA01-085262g	1	-	945	945	LANO0B00804g	LAME0E13388g	ZYRO0B08756g	LAWA0D01046g	LACI0G00980g	LAFE0A00782g	LADA0A08240g	LAFA0F06172g	LAMI0C03598g	SAKL0G18678g	KLTH0D17446g
L.A1	A1LA01-085284g	1	-	946	946	LANO0B00782g	LAME0E13410g	ZYRO0B08778g	LAWA0D01068g	LACI0G00958g	LAFE0A00760g	LADA0A08262g	LAFA0F06194g	LAMI0C03576g	SAKL0G18700g	KLTH0D17424g
L.A1	A1LA01-085306g	1	+	947	947	LANO0B00760g	LAME0E13432g	ZYRO0B08800g	LAWA0D01090g	LACI0G00936g	LAFE0A00738g	LADA0A08284g	LAFA0F06216g	LAMI0C03554g	SAKL0G18722g	KLTH0D17402g
L.A1	A1LA01-085328g	1	-	948	948	LANO0B00738g	LAME0E13454g	ZYRO0B08690g	LAWA0D01112g	LACI0G00914g	LAFE0A00716g	LADA0A08306g	LAFA0F06238g	LAMI0C03532g	SAKL0G18744g	KLTH0D17380g
L.A1	A1LA01-085350g	1	+	949	949	LANO0B00716g	LAME0E13476g	ZYRO0B08844g	LAWA0D01134g	LACI0G00892g	LAFE0A00694g	LADA0A08328g	LAFA0F06260g	LAMI0C03510g	SAKL0G18766g	KLTH0D17358g
L.A1	A1LA01-019042g	1	-	950	950	LANO0B00694g	LAME0E13498g	ZYRO0B08866g	LAWA0D01156g	LACI0G00870g	LAFE0A00672g	LADA0A08350g	LAFA0F06282g	LAMI0C03488g	SAKL0B12188g	KLTH0D17336g
L.A1	A1LA01-019064g	1	+	951	951	LANO0B00672g	LAME0E13520g	ZYRO0B08888g	LAWA0D01178g	LACI0G00848g	LAFE0A00650g	LADA0A08372g	LAFA0F06304g	LAMI0C03466g	SAKL0B12210g	KLTH0D17314g
L.A1	A1LA02-054594g	2	+	1	952	LANO0E05622g	LAME0F04016g	ZYRO0G06556g	LAWA0B00848g	LACI0H25202g	LAFE0F00804g	LADA0D01046g	LAFA0E18844g	LAMI0H00826g	SAKL0E14960g	KLTH0E01012g
L.A1	A1LA02-054572g	2	-	2	953	LANO0E05644g	LAME0F03994g	ZYRO0G06578g	LAWA0B00870g	LACI0H25180g	LAFE0F00826g	LADA0D01068g	LAFA0E18866g	LAMI0H00848g	SAKL0E14938g	KLTH0E01034g
L.A1	A1LA02-054550g	2	-	3	954	LANO0E05666g	LAME0F03972g	ZYRO0G06600g	LAWA0B00892g	LACI0H25158g	LAFE0F00848g	LADA0D01090g	LAFA0E18888g	LAMI0H00870g	SAKL0E14916g	KLTH0E01056g
L.A1	A1LA02-054528g	2	+	4	955	LANO0E05688g	LAME0F03950g	ZYRO0G06622g	LAWA0B00914g	LACI0H25136g	LAFE0F00870g	LADA0D01112g	LAFA0E18910g	LAMI0H00892g	SAKL0E14894g	KLTH0E01078g
L.A1	A1LA02-054506g	2	-	5	956	LANO0E05710g	LAME0F03928g	ZYRO0G06644g	LAWA0B00936g	LACI0H25114g	LAFE0F00892g	LADA0D01134g	LAFA0E18932g	LAMI0H00914g	SAKL0E14872g	KLTH0E01100g
L.A1	A1LA02-054484g	2	-	6	957	LANO0E05732g	LAME0F03906g	ZYRO0G06666g	LAWA0B00958g	LACI0H25092g	LAFE0F00914g	LADA0D01156g	LAFA0E18954g	LAMI0H00936g	SAKL0E14850g	KLTH0E01122g
L.A1	A1LA02-054462g	2	-	7	958			ZYRO0G06688g						LAMI0H01002g	SAKL0E14828g
L.A1	A1LA02-054418g	2	-	8	959	LANO0E05776g	LAME0F03862g	ZYRO0G06732g	LAWA0B01002g	LACI0H25048g	LAFE0F00958g	LADA0D01200g	LAFA0E18998g	LAMI0C02982g	SAKL0E14762g	KLTH0E01166g
L.A1	A1LA02-054396g	2	+	9	960	LANO0E05798g	LAME0F03840g	ZYRO0G14652g	LAWA0B01024g	LACI0H25026g	LAFE0F00980g	LADA0D01222g	LAFA0E19020g	LAMI0C03004g	SAKL0E14740g	KLTH0E01188g
L.A1	A1LA02-054374g	2	-	10	961	LANO0E05820g	LAME0F03818g	ZYRO0G14630g	LAWA0B01046g	LACI0H25004g	LAFE0F01002g	LADA0D01244g	LAFA0E19042g	LAMI0C03026g	SAKL0E14718g	KLTH0E01210g
L.A1	A1LA02-054330g	2	-	11	962	LANO0E05864g	LAME0F03774g	ZYRO0G14586g		LACI0H24960g		LADA0D01288g	LAFA0E19086g	LAMI0C03070g	SAKL0E14674g
L.A1	A1LA02-054308g	2	-	12	963	LANO0E05886g	LAME0F03752g	ZYRO0G14564g	LAWA0B01090g	LACI0H24938g	LAFE0F01046g	LADA0D01310g	LAFA0E19108g	LAMI0C03092g	SAKL0E14652g	KLTH0E01254g
L.A1	A1LA02-054286g	2	-	13	964	LANO0E05908g	LAME0F03730g	ZYRO0G14542g	LAWA0B01112g	LACI0H24916g	LAFE0F01068g	LADA0D01332g	LAFA0E19130g	LAMI0C03114g	SAKL0E14630g	KLTH0E01276g
L.A1	A1LA02-054264g	2	+	14	965	LANO0H24366g	LAME0D00892g	ZYRO0G14520g	LAWA0B11210g	LACI0H24894g	LAFE0F01090g	LADA0A00936g	LAFA0D16600g	LAMI0C03136g	SAKL0E14564g	KLTH0F18172g
L.A1	A1LA02-054242g	2	-	15	966	LANO0H24344g	LAME0D00914g	ZYRO0G14498g	LAWA0B11188g	LACI0H24872g	LAFE0F01112g	LADA0A00958g	LAFA0D16578g	LAMI0C03158g	SAKL0E14542g	KLTH0F18150g
L.A1	A1LA02-054220g	2	+	16	967	LANO0H24322g	LAME0D00936g	ZYRO0G14476g	LAWA0B11166g	LACI0H24850g	LAFE0F01134g	LADA0A00980g	LAFA0D16556g	LAMI0C03180g	SAKL0E14520g	KLTH0F18128g
L.A1	A1LA02-054198g	2	-	17	968	LANO0H24300g	LAME0D00958g	ZYRO0G14454g	LAWA0B11144g	LACI0H24828g	LAFE0F01156g	LADA0A01002g	LAFA0D16534g	LAMI0C03202g	SAKL0E14498g	KLTH0F18106g
L.A1	A1LA02-054154g	2	-	18	969	LANO0H24256g	LAME0D01002g	ZYRO0A11902g	LAWA0B11100g	LACI0H24784g	LAFE0F01200g	LADA0A01046g	LAFA0D16490g	LAMI0C03246g	SAKL0E14454g	KLTH0F18062g
L.A1	A1LA02-054132g	2	+	19	970	LANO0H24234g	LAME0D01024g	ZYRO0A11880g	LAWA0B11078g	LACI0H24762g	LAFE0F01222g	LADA0A01090g	LAFA0D16468g	LAMI0H10198g	SAKL0E14432g	KLTH0F18040g
L.A1	A1LA02-054110g	2	-	20	971	LANO0H24212g	LAME0D01046g	ZYRO0A11858g	LAWA0B11056g	LACI0H24740g	LAFE0F01244g	LADA0A01112g	LAFA0D16446g	LAMI0H10176g	SAKL0E14410g	KLTH0F18018g
L.A1	A1LA02-068872g	2	+	21	972	LANO0H24190g	LAME0D01068g	ZYRO0A11836g	LAWA0B11034g	LACI0H24718g	LAFE0F01266g	LADA0A01134g	LAFA0D16424g	LAMI0H10154g	SAKL0G00506g	KLTH0F17996g
L.A1	A1LA02-068894g	2	-	22	973	LANO0H24168g	LAME0D01090g	ZYRO0A11814g	LAWA0B11012g	LACI0H24696g	LAFE0F01288g	LADA0A01156g	LAFA0D16402g	LAMI0H10132g	SAKL0G00528g	KLTH0F17974g
L.A1	A1LA02-068916g	2	+	23	974	LANO0H24146g	LAME0D01112g	ZYRO0A11792g	LAWA0B10990g	LACI0H24674g	LAFE0F01310g	LADA0A01178g	LAFA0D16358g	LAMI0H10110g	SAKL0G00550g	KLTH0F17952g
L.A1	A1LA02-068938g	2	-	24	975	LANO0H24124g	LAME0D01134g	ZYRO0A11770g	LAWA0B10968g	LACI0H24652g	LAFE0F01332g	LADA0A01200g	LAFA0D16336g		SAKL0G00572g	KLTH0F17930g
L.A1	A1LA02-068960g	2	+	25	976	LANO0H24102g	LAME0D01156g	ZYRO0A11748g	LAWA0B10946g	LACI0H24630g	LAFE0F01354g	LADA0A01222g	LAFA0D16314g	LAMI0H10088g	SAKL0G00594g	KLTH0F17908g
L.A1	A1LA02-068982g	2	-	26	977	LANO0H24080g	LAME0D01178g	ZYRO0A11726g	LAWA0B10924g	LACI0H24608g	LAFE0F01376g	LADA0A01244g	LAFA0D16292g	LAMI0H10066g	SAKL0G00616g	KLTH0F17886g
L.A1	A1LA02-069004g	2	+	27	978	LANO0H24058g	LAME0D01200g	ZYRO0A11704g	LAWA0B10902g	LACI0H24586g	LAFE0F01398g	LADA0A01266g	LAFA0D16270g	LAMI0H10044g	SAKL0G00638g	KLTH0F17864g
L.A1	A1LA02-069026g	2	-	28	979	LANO0H24036g	LAME0D01222g	ZYRO0A11682g	LAWA0B10880g	LACI0H24564g	LAFE0F01420g	LADA0A01288g	LAFA0D16248g	LAMI0H10022g	SAKL0G00660g	KLTH0F17842g
L.A1	A1LA02-069048g	2	+	29	980	LANO0H24014g	LAME0D01244g	ZYRO0A11660g	LAWA0B10858g	LACI0H24542g	LAFE0F01442g	LADA0A01310g	LAFA0D16226g	LAMI0H10000g	SAKL0G00682g	KLTH0F17820g
L.A1	A1LA02-069070g	2	-	30	981	LANO0H23992g	LAME0D01266g	ZYRO0A11638g	LAWA0B10836g	LACI0H24520g	LAFE0F01464g	LADA0A01332g	LAFA0D16204g	LAMI0H09978g	SAKL0G00704g	KLTH0F17798g
L.A1	A1LA02-069092g	2	+	31	982	LANO0H23970g	LAME0D01288g	ZYRO0A11616g	LAWA0B10814g	LACI0H24498g	LAFE0F01486g	LADA0A01354g	LAFA0D16182g	LAMI0H09956g	SAKL0G00726g	KLTH0F17776g
L.A1	A1LA02-069114g	2	-	32	983	LANO0H23948g	LAME0D01310g	ZYRO0A11594g	LAWA0B10792g	LACI0H24476g	LAFE0F01508g	LADA0A01376g	LAFA0D16160g	LAMI0H09934g	SAKL0G00748g	KLTH0F17754g
L.A1	A1LA02-069136g	2	+	33	984	LANO0H23926g	LAME0D01332g	ZYRO0A11572g	LAWA0B10770g	LACI0H24454g	LAFE0F01530g	LADA0A01398g	LAFA0D16138g	LAMI0H09912g	SAKL0G00770g	KLTH0F17732g
L.A1	A1LA02-069158g	2	+	34	985	LANO0H23904g	LAME0D01354g	ZYRO0A11770g	LAWA0B10748g	LACI0H24432g	LAFE0F01552g	LADA0A01420g	LAFA0D16116g	LAMI0H09890g	SAKL0G00792g	KLTH0F17710g
L.A1	A1LA02-069180g	2	-	35	986	LANO0H23882g	LAME0D01376g	ZYRO0A11528g	LAWA0B10726g	LACI0H24410g	LAFE0F01574g	LADA0A01442g	LAFA0D16094g	LAMI0H09868g	SAKL0G00814g	KLTH0F17688g
L.A1	A1LA02-069202g	2	+	36	987	LANO0H23860g	LAME0D01398g	ZYRO0A11506g	LAWA0B10704g	LACI0H24388g	LAFE0F01596g	LADA0A01464g	LAFA0D16072g	LAMI0H09846g	SAKL0G00836g	KLTH0F17666g
L.A1	A1LA02-069224g	2	-	37	988	LANO0H23838g	LAME0D01420g	ZYRO0A11484g	LAWA0B10682g	LACI0H24366g	LAFE0F01618g	LADA0A01486g	LAFA0D16050g	LAMI0H09824g	SAKL0G00858g	KLTH0F17644g
L.A1	A1LA02-069268g	2	-	38	989	LANO0H23794g	LAME0D01442g	ZYRO0B16126g	LAWA0B10638g	LACI0H24322g	LAFE0F01794g	LADA0A01508g	LAFA0D16028g	LAMI0H09758g	SAKL0G00902g	KLTH0F17600g
L.A1	A1LA02-069290g	2	+	39	990	LANO0H23772g	LAME0D01464g	ZYRO0B16104g	LAWA0B10616g	LACI0H24300g	LAFE0F01816g	LADA0A01552g	LAFA0D16006g	LAMI0H09714g	SAKL0G00924g	KLTH0F17578g
L.A1	A1LA02-069312g	2	-	40	991	LANO0H23750g	LAME0D01486g	ZYRO0B16082g	LAWA0B10594g	LACI0H24278g	LAFE0F01838g	LADA0A01574g	LAFA0D15984g	LAMI0H09692g	SAKL0G00946g	KLTH0F17556g
L.A1	A1LA02-069334g	2	+	41	992	LANO0H23728g	LAME0D01508g	ZYRO0B16060g	LAWA0B10572g	LACI0H24256g	LAFE0F01860g	LADA0A01618g	LAFA0D15962g	LAMI0H09670g	SAKL0G00968g	KLTH0F17512g
L.A1	A1LA02-069356g	2	-	42	993	LANO0H23706g	LAME0D01530g	ZYRO0B16038g	LAWA0B10550g	LACI0H24234g	LAFE0F01882g	LADA0A01596g	LAFA0D15940g	LAMI0H09648g	SAKL0G00990g	KLTH0F17490g
L.A1	A1LA02-069378g	2	+	43	994	LANO0H23684g	LAME0D01552g	ZYRO0B16016g	LAWA0B10528g	LACI0H24212g	LAFE0F01904g	LADA0A01662g	LAFA0D15918g	LAMI0H09626g	SAKL0G01012g	KLTH0F17468g
L.A1	A1LA02-069400g	2	+	44	995	LANO0H23662g	LAME0D01574g	ZYRO0B15994g	LAWA0B10506g	LACI0H24190g	LAFE0F01926g	LADA0A01684g	LAFA0D15896g	LAMI0H09604g	SAKL0G01034g	KLTH0F17446g
L.A1	A1LA02-069422g	2	-	45	996		LAME0D01596g	ZYRO0B15972g	LAWA0B10484g	LACI0H24168g	LAFE0F01948g	LADA0A01706g	LAFA0D15874g	LAMI0H09582g	SAKL0G01056g	KLTH0F17424g
L.A1	A1LA02-069444g	2	+	46	997	LANO0H23618g	LAME0D01618g	ZYRO0B15928g	LAWA0B10462g	LACI0H24146g	LAFE0F01992g	LADA0A01728g	LAFA0D15852g	LAMI0E12442g	SAKL0G01100g	KLTH0F17380g
L.A1	A1LA02-069466g	2	-	47	998	LANO0H23596g	LAME0D01640g	ZYRO0B15906g	LAWA0B10440g	LACI0H24124g	LAFE0F02014g	LADA0A01750g	LAFA0D15830g	LAMI0E12464g	SAKL0G01122g	KLTH0F17358g
L.A1	A1LA02-069488g	2	+	48	999	LANO0H23574g	LAME0D01662g	ZYRO0B15884g		LACI0H24102g	LAFE0F02036g	LADA0A01772g	LAFA0D15808g	LAMI0E12486g	SAKL0G01144g	KLTH0F17336g
L.A1	A1LA02-069510g	2	+	49	1000		LAME0D01684g	ZYRO0B15862g	LAWA0B10396g	LACI0H24080g	LAFE0F02058g	LADA0A01794g	LAFA0D15786g	LAMI0E12508g	SAKL0G01166g	KLTH0F17314g
L.A1	A1LA02-069532g	2	+	50	1001	LANO0H23530g	LAME0D01706g	ZYRO0B15840g	LAWA0B10374g	LACI0H24058g	LAFE0F02080g	LADA0A01816g	LAFA0D15764g	LAMI0E12530g	SAKL0G01188g	KLTH0F17292g
L.A1	A1LA02-069554g	2	+	51	1002	LANO0H23508g	LAME0D01728g	ZYRO0B15818g	LAWA0B10352g	LACI0H24036g	LAFE0F02102g	LADA0A01860g	LAFA0D15742g	LAMI0E12552g	SAKL0G01210g	KLTH0F17270g
L.A1	A1LA02-069576g	2	-	52	1003	LANO0H23486g	LAME0D01750g	ZYRO0B15796g	LAWA0B10330g	LACI0H24014g	LAFE0F02124g	LADA0A01882g	LAFA0D15720g	LAMI0E12574g	SAKL0G01232g	KLTH0F17248g
L.A1	A1LA02-069598g	2	-	53	1004	LANO0H23464g	LAME0D01772g	ZYRO0B15774g	LAWA0B10308g	LACI0H23992g	LAFE0F02146g	LADA0A01904g	LAFA0D15698g	LAMI0E12596g	SAKL0G01254g	KLTH0F17226g
L.A1	A1LA02-069620g	2	+	54	1005	LANO0H23442g	LAME0D01794g	ZYRO0B15752g	LAWA0B10286g	LACI0H23970g	LAFE0F02168g	LADA0A01926g	LAFA0D15676g	LAMI0E12618g	SAKL0G01276g	KLTH0F17204g
L.A1	A1LA02-069642g	2	+	55	1006	LANO0H23376g	LAME0D01816g	ZYRO0B15730g	LAWA0B10264g	LACI0H23948g	LAFE0F02190g	LADA0A01948g	LAFA0D15654g	LAMI0E12640g	SAKL0G01298g	KLTH0F17182g
L.A1	A1LA02-069664g	2	-	56	1007	LANO0H23398g	LAME0D01838g	ZYRO0B15708g	LAWA0B10242g	LACI0H23926g	LAFE0F02212g	LADA0A01970g	LAFA0D15632g	LAMI0E12662g	SAKL0G01320g	KLTH0F17160g
L.A1	A1LA02-069686g	2	+	57	1008	LANO0H23332g	LAME0D01860g	ZYRO0B15686g	LAWA0B10220g	LACI0H23904g	LAFE0F02234g	LADA0A01992g	LAFA0D15610g	LAMI0E12684g	SAKL0G01342g	KLTH0F17138g
L.A1	A1LA02-069708g	2	-	58	1009	LANO0H23310g	LAME0D01882g	ZYRO0B15664g		LACI0H23882g	LAFE0F02256g	LADA0A02014g	LAFA0D15588g	LAMI0E12706g	SAKL0G01364g
L.A1	A1LA02-069730g	2	+	59	1010	LANO0H23288g	LAME0D01904g	ZYRO0B15642g	LAWA0B10198g	LACI0H23860g	LAFE0F02278g	LADA0A02036g	LAFA0D15566g	LAMI0E12750g	SAKL0G01386g	KLTH0F17116g
L.A1	A1LA02-069774g	2	+	60	1011	LANO0H23244g	LAME0D01970g	ZYRO0B15576g	LAWA0B10154g	LACI0H23816g	LAFE0F02322g	LADA0A02080g	LAFA0D15522g	LAMI0E12794g	SAKL0G01496g	KLTH0F17050g
L.A1	A1LA02-069818g	2	-	61	1012	LANO0H23200g	LAME0D02014g	ZYRO0B15554g	LAWA0B10110g	LACI0H23772g	LAFE0F02366g	LADA0A02124g	LAFA0D15478g	LAMI0E12838g	SAKL0G01518g	KLTH0F17028g
L.A1	A1LA02-069862g	2	-	62	1013	LANO0H23134g	LAME0D02080g	ZYRO0C11396g	LAWA0B10000g	LACI0H23706g	LAFE0F02432g	LADA0A02190g	LAFA0D15412g	LAMI0E12904g	SAKL0G01584g	KLTH0F16918g
L.A1	A1LA02-069884g	2	-	63	1014	LANO0H23112g	LAME0D02102g	ZYRO0C11374g	LAWA0B09978g	LACI0H23684g	LAFE0F02454g	LADA0A02212g	LAFA0D15390g	LAMI0E12926g	SAKL0G01606g	KLTH0F16896g
L.A1	A1LA02-069928g	2	-	64	1015	LANO0H23090g	LAME0D02124g	ZYRO0C11352g	LAWA0B09956g	LACI0H23640g	LAFE0F02476g	LADA0A02234g	LAFA0D15368g	LAMI0E12948g	SAKL0G01650g	KLTH0F16874g
L.A1	A1LA02-069950g	2	-	65	1016	LANO0H23068g	LAME0D02146g	ZYRO0C11330g	LAWA0B09934g	LACI0H23618g	LAFE0F02498g	LADA0A02256g	LAFA0D15346g	LAMI0E12970g	SAKL0G01672g	KLTH0F16852g
L.A1	A1LA02-069972g	2	+	66	1017	LANO0H23046g	LAME0D02168g	ZYRO0C11308g	LAWA0B09912g	LACI0H23596g	LAFE0F02520g	LADA0A02278g	LAFA0D15324g	LAMI0E12992g	SAKL0G01694g	KLTH0F16830g
L.A1	A1LA02-069994g	2	-	67	1018	LANO0H23024g	LAME0D02190g	ZYRO0C11286g	LAWA0B09890g	LACI0H23574g	LAFE0F02542g	LADA0A02300g	LAFA0D15302g	LAMI0E13014g	SAKL0G01716g	KLTH0F16808g
L.A1	A1LA02-070016g	2	-	68	1019	LANO0H23002g	LAME0D02212g	ZYRO0C11264g	LAWA0B09868g	LACI0H23552g	LAFE0F02564g	LADA0A02322g	LAFA0D15280g	LAMI0E13036g	SAKL0G01738g	KLTH0F16786g
L.A1	A1LA02-070038g	2	+	69	1020	LANO0H22980g	LAME0D02234g	ZYRO0C11242g	LAWA0B09846g	LACI0H23530g	LAFE0F02586g	LADA0A02344g	LAFA0D15258g	LAMI0E13058g	SAKL0G01760g	KLTH0F16764g
L.A1	A1LA02-070060g	2	-	70	1021	LANO0H22958g	LAME0D02256g	ZYRO0C11220g	LAWA0B09824g	LACI0H23508g	LAFE0F02608g	LADA0A02366g	LAFA0D15236g	LAMI0E13080g	SAKL0G01782g	KLTH0F16742g
L.A1	A1LA02-070082g	2	-	71	1022	LANO0H22936g	LAME0D02278g	ZYRO0A06490g	LAWA0B09802g	LACI0H23486g	LAFE0F02630g	LADA0A02388g	LAFA0D15214g	LAMI0E13102g	SAKL0G01804g	KLTH0F16720g
L.A1	A1LA02-070104g	2	-	72	1023	LANO0H22914g	LAME0D02300g	ZYRO0A06468g	LAWA0B09780g	LACI0H23464g	LAFE0F02652g	LADA0A02410g	LAFA0D15192g	LAMI0E13124g	SAKL0G01826g	KLTH0F16698g
L.A1	A1LA02-070126g	2	+	73	1024	LANO0H22892g	LAME0D02322g	ZYRO0A06446g	LAWA0B09758g	LACI0H23442g	LAFE0F02674g	LADA0A02432g	LAFA0D15170g	LAMI0E13146g	SAKL0G01848g	KLTH0F16676g
L.A1	A1LA02-070148g	2	+	74	1025	LANO0H22870g	LAME0D02344g	ZYRO0A06380g	LAWA0B09736g	LACI0H23420g	LAFE0F02696g	LADA0A02454g	LAFA0D15148g	LAMI0E13168g	SAKL0G01870g	KLTH0F16654g
L.A1	A1LA02-070170g	2	+	75	1026	LANO0H22848g	LAME0D02366g	ZYRO0A06358g	LAWA0B09714g	LACI0H23398g	LAFE0F02718g	LADA0A02476g	LAFA0D15126g	LAMI0E13190g	SAKL0G01892g	KLTH0F16632g
L.A1	A1LA02-070192g	2	+	76	1027	LANO0H22826g	LAME0D02388g	ZYRO0A06336g	LAWA0B09692g	LACI0H23376g	LAFE0F02740g	LADA0A02498g	LAFA0D15104g	LAMI0E13212g	SAKL0G01914g	KLTH0F16610g
L.A1	A1LA02-070214g	2	+	77	1028	LANO0H22804g	LAME0D02410g	ZYRO0A06314g	LAWA0B09670g	LACI0H23354g	LAFE0F02762g	LADA0A02520g	LAFA0D15082g	LAMI0E13234g	SAKL0G01936g	KLTH0F16588g
L.A1	A1LA02-070236g	2	+	78	1029	LANO0H22782g	LAME0D02454g	ZYRO0A06292g	LAWA0B09648g	LACI0H23332g	LAFE0F02784g	LADA0A02542g	LAFA0D15060g	LAMI0E13256g	SAKL0G01958g	KLTH0F16566g
L.A1	A1LA02-070258g	2	-	79	1030	LANO0H22760g	LAME0D02476g	ZYRO0A06270g	LAWA0B09626g	LACI0H23310g	LAFE0F02806g	LADA0A02564g	LAFA0D15038g	LAMI0E13278g	SAKL0G01980g	KLTH0F16544g
L.A1	A1LA02-070280g	2	+	80	1031	LANO0H22738g	LAME0D02498g	ZYRO0F09548g	LAWA0B09604g	LACI0H23288g	LAFE0F02828g	LADA0B02960g	LAFA0D15016g	LAMI0E13300g	SAKL0G02002g	KLTH0F16522g
L.A1	A1LA02-070302g	2	+	81	1032	LANO0H22716g	LAME0D02520g	ZYRO0F09570g		LACI0H23266g	LAFE0F02850g	LADA0B02982g	LAFA0D14994g	LAMI0E13322g	SAKL0G02024g	KLTH0F16500g
L.A1	A1LA02-070324g	2	-	82	1033	LANO0H22694g	LAME0D02542g	ZYRO0F09592g	LAWA0B09560g	LACI0H23222g	LAFE0F02872g	LADA0B03004g	LAFA0D14972g	LAMI0E13344g	SAKL0G02046g	KLTH0F16478g
L.A1	A1LA02-070346g	2	+	83	1034	LANO0H22672g	LAME0D02564g	ZYRO0F09614g	LAWA0B09538g	LACI0H23222g	LAFE0F02894g	LADA0B03026g	LAFA0D14950g	LAMI0E13432g	SAKL0G02068g	KLTH0F16456g
L.A1	A1LA02-070368g	2	-	84	1035	LANO0H22650g	LAME0D02586g	ZYRO0F09636g	LAWA0B09516g	LACI0H23200g	LAFE0F02916g	LADA0B03048g	LAFA0D14928g	LAMI0E13454g	SAKL0G02090g	KLTH0F16434g
L.A1	A1LA02-070390g	2	-	85	1036	LANO0H22628g	LAME0D02608g	ZYRO0F09658g	LAWA0B09494g	LACI0H23178g	LAFE0F02938g	LADA0B03070g	LAFA0D14906g	LAMI0E13476g	SAKL0G02112g	KLTH0F16412g
L.A1	A1LA02-070412g	2	+	86	1037	LANO0H22606g	LAME0D02630g	ZYRO0F09680g	LAWA0B09472g	LACI0H23156g	LAFE0F02960g	LADA0B03092g	LAFA0D14884g	LAMI0E13498g	SAKL0G02134g	KLTH0F16390g
L.A1	A1LA02-070434g	2	+	87	1038	LANO0H22584g	LAME0D02652g	ZYRO0F09702g	LAWA0B09450g	LACI0H23134g	LAFE0F02982g	LADA0B03114g	LAFA0D14862g	LAMI0E13520g	SAKL0G02156g	KLTH0F16368g
L.A1	A1LA02-070456g	2	+	88	1039	LANO0H22562g	LAME0D02674g	ZYRO0F09724g	LAWA0B09428g	LACI0H23112g	LAFE0F03004g	LADA0B03136g	LAFA0D14840g	LAMI0E13542g	SAKL0G02178g	KLTH0F16346g
L.A1	A1LA02-070478g	2	-	89	1040	LANO0H22540g	LAME0D02696g	ZYRO0F09746g	LAWA0B09406g	LACI0H23090g	LAFE0F03026g	LADA0B03158g	LAFA0D14818g	LAMI0E13564g	SAKL0G02200g	KLTH0F16324g
L.A1	A1LA02-070500g	2	-	90	1041			ZYRO0F09768g							SAKL0G02222g
L.A1	A1LA02-070522g	2	+	91	1042	LANO0H22518g	LAME0D02718g	ZYRO0F09790g		LACI0H23068g	LAFE0F03048g	LADA0B03180g	LAFA0D14796g	LAMI0E13586g	SAKL0G02244g	KLTH0F16302g
L.A1	A1LA02-070544g	2	+	92	1043	LANO0H22496g	LAME0D02740g	ZYRO0F09812g	LAWA0B09362g	LACI0H23046g	LAFE0F03070g	LADA0B03202g	LAFA0D14774g	LAMI0E13608g	SAKL0G02266g	KLTH0F16280g
L.A1	A1LA02-070566g	2	-	93	1044	LANO0H22474g	LAME0D02762g	ZYRO0F09856g	LAWA0B09318g	LACI0H23024g	LAFE0F03092g	LADA0B03224g	LAFA0D14752g	LAMI0E13630g	SAKL0G02354g	KLTH0F16236g
L.A1	A1LA02-070588g	2	+	94	1045	LANO0H22430g	LAME0D02806g	ZYRO0F09900g	LAWA0B09274g	LACI0H22980g	LAFE0F03136g	LADA0B03268g	LAFA0D14708g	LAMI0E13674g	SAKL0G02376g	KLTH0F16214g
L.A1	A1LA02-070610g	2	-	95	1046	LANO0H22408g	LAME0D02828g	ZYRO0F09922g	LAWA0B09252g	LACI0H22958g	LAFE0F03158g	LADA0B03290g	LAFA0D14686g	LAMI0E13696g	SAKL0G02398g	KLTH0F16192g
L.A1	A1LA02-070632g	2	-	96	1047	LANO0H22386g	LAME0D02850g	ZYRO0F09944g	LAWA0B09230g	LACI0H22936g	LAFE0F03180g	LADA0B03312g	LAFA0D14664g	LAMI0E13718g	SAKL0G02442g	KLTH0F16148g
L.A1	A1LA02-070654g	2	+	97	1048	LANO0H22364g	LAME0D02872g	ZYRO0F09966g	LAWA0B09208g	LACI0H22914g	LAFE0F03202g	LADA0B03334g	LAFA0D14642g	LAMI0E13740g	SAKL0G02464g	KLTH0F16126g
L.A1	A1LA02-070676g	2	-	98	1049	LANO0H22342g	LAME0D02894g	ZYRO0F09988g	LAWA0B09186g	LACI0H22892g	LAFE0F03224g	LADA0B03356g	LAFA0D14620g	LAMI0E13762g	SAKL0G02486g	KLTH0F16104g
L.A1	A1LA02-070698g	2	+	99	1050	LANO0H22320g	LAME0D02916g	ZYRO0F10010g	LAWA0B09164g	LACI0H22870g	LAFE0F03246g	LADA0B03378g	LAFA0D14598g	LAMI0E13784g	SAKL0G02508g	KLTH0F16082g
L.A1	A1LA02-070720g	2	+	100	1051	LANO0H22298g	LAME0D02938g	ZYRO0F10032g	LAWA0B09142g	LACI0H22848g	LAFE0F03268g		LAFA0D14576g	LAMI0E13806g	SAKL0G02530g	KLTH0F16060g
L.A1	A1LA02-070742g	2	-	101	1052	LANO0H22210g	LAME0D02960g	ZYRO0F10054g	LAWA0B09120g	LACI0H22826g	LAFE0F03290g	LADA0B03400g	LAFA0D14554g	LAMI0E13828g	SAKL0G02552g	KLTH0F16038g
L.A1	A1LA02-070764g	2	-	102	1053		LAME0D02982g	ZYRO0F10076g	LAWA0B09098g	LACI0H22804g	LAFE0F03312g	LADA0B03422g	LAFA0D14532g	LAMI0E13850g	SAKL0G02574g	KLTH0F16016g
L.A1	A1LA02-070786g	2	-	103	1054	LANO0H22254g	LAME0D03004g	ZYRO0F10098g	LAWA0B09076g	LACI0H22782g	LAFE0F03334g	LADA0B03444g	LAFA0D14510g	LAMI0E13872g	SAKL0G02596g	KLTH0F15994g
L.A1	A1LA02-070830g	2	+	104	1055	LANO0H22210g	LAME0D03048g	ZYRO0F10120g	LAWA0B09054g	LACI0H22760g	LAFE0F03356g	LADA0B03488g	LAFA0D14356g	LAMI0E13894g	SAKL0G02618g	KLTH0F15972g
L.A1	A1LA02-070852g	2	-	105	1056	LANO0H22188g	LAME0D03070g	ZYRO0F10142g	LAWA0B09032g	LACI0H22738g	LAFE0F03378g	LADA0B03510g	LAFA0D14444g	LAMI0E13916g	SAKL0G02640g	KLTH0F15950g
L.A1	A1LA02-070874g	2	-	106	1057	LANO0H22166g	LAME0D03092g	ZYRO0F10164g	LAWA0B09010g	LACI0H22716g	LAFE0F03400g	LADA0B03532g	LAFA0D14422g	LAMI0E13938g	SAKL0G02662g	KLTH0F15928g
L.A1	A1LA02-070896g	2	+	107	1058	LANO0H22144g	LAME0D03114g	ZYRO0F10186g	LAWA0B08988g	LACI0H22694g	LAFE0F03422g	LADA0B03554g	LAFA0D14400g	LAMI0E13960g	SAKL0G02684g	KLTH0F15906g
L.A1	A1LA02-070918g	2	-	108	1059	LANO0H22122g	LAME0D03136g	ZYRO0F10208g	LAWA0B08966g	LACI0H22672g	LAFE0F03444g	LADA0B03576g	LAFA0D14378g	LAMI0E13982g	SAKL0G02706g	KLTH0F15884g
L.A1	A1LA02-070940g	2	-	109	1060	LANO0H22100g	LAME0D03158g	ZYRO0G01606g	LAWA0B08944g	LACI0H22650g	LAFE0F03466g	LADA0B03598g	LAFA0D14356g	LAMI0E14004g	SAKL0G02728g	KLTH0F15862g
L.A1	A1LA02-070962g	2	+	110	1061	LANO0H22078g	LAME0D03180g	ZYRO0G01628g	LAWA0B08922g	LACI0H22628g	LAFE0F03488g	LADA0B03620g	LAFA0D14334g	LAMI0E14026g	SAKL0G02750g	KLTH0F15796g
L.A1	A1LA02-070984g	2	-	111	1062	LANO0H22056g	LAME0D03202g	ZYRO0G01650g	LAWA0B08900g	LACI0H22606g	LAFE0F03510g	LADA0B03642g	LAFA0D14312g	LAMI0E14048g	SAKL0G02772g	KLTH0F15774g
L.A1	A1LA02-071006g	2	-	112	1063	LANO0H22034g	LAME0D03224g	ZYRO0G01672g	LAWA0B08878g	LACI0H22584g	LAFE0F03532g	LADA0B03664g	LAFA0D14290g		SAKL0G02794g	KLTH0F15752g
L.A1	A1LA02-071028g	2	-	113	1064	LANO0H22012g	LAME0D03246g	ZYRO0G01716g	LAWA0B08834g	LACI0H22540g	LAFE0F03576g	LADA0B03686g	LAFA0D14268g	LAMI0E14070g	SAKL0G02816g	KLTH0F15730g
L.A1	A1LA02-071050g	2	-	114	1065			ZYRO0G01738g	LAWA0B08812g	LACI0H22518g	LAFE0F03642g			LAMI0E14092g	SAKL0G02838g	KLTH0F15686g
L.A1	A1LA02-071072g	2	+	115	1066	LANO0H21990g		ZYRO0G01760g	LAWA0B08790g	LACI0H22496g	LAFE0F03664g	LADA0B03708g	LAFA0D14246g	LAMI0E14114g	SAKL0G02860g	KLTH0F15664g
L.A1	A1LA02-071094g	2	+	116	1067	LANO0H21968g	LAME0F10660g	ZYRO0G01782g	LAWA0B08768g	LACI0H22474g	LAFE0F03686g	LADA0B03730g	LAFA0D06040g	LAMI0E14136g	SAKL0G02882g	KLTH0F15642g
L.A1	A1LA02-071116g	2	-	117	1068	LANO0H21946g	LAME0F10638g	ZYRO0G01804g	LAWA0B08746g	LACI0H22452g	LAFE0F03708g	LADA0B03752g	LAFA0D06062g	LAMI0E14158g	SAKL0G02904g	KLTH0F15620g
L.A1	A1LA02-071138g	2	+	118	1069	LANO0H21924g	LAME0F10616g	ZYRO0G04444g	LAWA0B08724g	LACI0H22430g	LAFE0F03730g	LADA0B03774g	LAFA0D06084g	LAMI0E14180g	SAKL0G02926g	KLTH0F15598g
L.A1	A1LA02-071160g	2	-	119	1070	LANO0H21902g	LAME0F10594g	ZYRO0G04422g	LAWA0B08702g	LACI0H22408g	LAFE0F03752g	LADA0B03796g	LAFA0D06106g	LAMI0E14202g	SAKL0G02948g	KLTH0F15576g
L.A1	A1LA02-071226g	2	-	120	1071	LANO0H21836g	LAME0F10528g	ZYRO0G04400g	LAWA0B08658g	LACI0H22342g	LAFE0F03840g	LADA0B03862g	LAFA0D06172g	LAMI0E14268g	SAKL0G03014g	KLTH0F15532g
L.A1	A1LA02-071248g	2	+	121	1072	LANO0H21814g		ZYRO0G04378g		LACI0H22320g	LAFE0F03862g		LAFA0D06194g		SAKL0G03036g	KLTH0F15510g
L.A1	A1LA02-071270g	2	-	122	1073	LANO0H21792g	LAME0F10484g	ZYRO0G04356g	LAWA0B08636g	LACI0H22298g	LAFE0F03884g	LADA0B03884g	LAFA0D06216g	LAMI0E14290g	SAKL0G03058g	KLTH0F15488g
L.A1	A1LA02-071292g	2	+	123	1074	LANO0H21770g	LAME0F10462g	ZYRO0B02310g	LAWA0B08614g	LACI0H22276g	LAFE0F03906g	LADA0B03906g	LAFA0D06238g	LAMI0E14312g	SAKL0G03080g	KLTH0F15466g
L.A1	A1LA02-071314g	2	-	124	1075	LANO0H21748g	LAME0F10440g	ZYRO0B02332g	LAWA0B08592g	LACI0H22254g	LAFE0F03928g	LADA0B03928g	LAFA0D06260g	LAMI0E14334g	SAKL0G03102g	KLTH0F15444g
L.A1	A1LA02-071336g	2	+	125	1076	LANO0H21726g	LAME0F10418g	ZYRO0B02354g	LAWA0B08570g	LACI0H22232g	LAFE0F03950g	LADA0B03950g	LAFA0D06282g	LAMI0E14356g	SAKL0G03124g	KLTH0F15422g
L.A1	A1LA02-071358g	2	-	126	1077	LANO0H21704g	LAME0F10396g	ZYRO0B02376g	LAWA0B08548g	LACI0H22210g	LAFE0F03972g	LADA0B03972g	LAFA0D06304g	LAMI0E14378g	SAKL0G03146g	KLTH0F15400g
L.A1	A1LA02-071380g	2	+	127	1078	LANO0H21682g	LAME0F10374g	ZYRO0B02398g	LAWA0B08526g	LACI0H22188g	LAFE0F03994g	LADA0B03994g	LAFA0D06326g	LAMI0E14400g	SAKL0G03168g	KLTH0F15378g
L.A1	A1LA02-071402g	2	-	128	1079	LANO0H21660g	LAME0F10352g	ZYRO0B02420g	LAWA0B08482g	LACI0H22166g	LAFE0F04016g	LADA0B04016g	LAFA0D06348g	LAMI0E14422g	SAKL0G03190g	KLTH0F15356g
L.A1	A1LA02-071424g	2	-	129	1080	LANO0H21638g	LAME0F10330g	ZYRO0B02442g	LAWA0B08504g	LACI0H22144g	LAFE0F04038g	LADA0B04038g	LAFA0D06370g	LAMI0E14444g	SAKL0G03278g	KLTH0F15268g
L.A1	A1LA02-071468g	2	+	130	1081	LANO0H21594g	LAME0F10286g	ZYRO0D11022g	LAWA0B08416g	LACI0H22100g	LAFE0F04082g	LADA0B04082g	LAFA0D06414g	LAMI0E14488g	SAKL0G03366g	KLTH0F15202g
L.A1	A1LA02-071490g	2	+	131	1082	LANO0H21572g	LAME0F10264g	ZYRO0D11044g	LAWA0B08394g	LACI0H22078g	LAFE0F04104g	LADA0B04104g	LAFA0D06436g	LAMI0E14510g	SAKL0G03388g	KLTH0F15180g
L.A1	A1LA02-071512g	2	+	132	1083	LANO0H21550g	LAME0F10242g	ZYRO0D11066g	LAWA0B08372g	LACI0H22056g	LAFE0F04126g	LADA0B04126g	LAFA0D06458g	LAMI0E14532g	SAKL0G03410g	KLTH0F15158g
L.A1	A1LA02-071534g	2	-	133	1084	LANO0H21528g	LAME0F10220g	ZYRO0D11088g	LAWA0B08350g	LACI0H22034g	LAFE0F04148g	LADA0B04148g	LAFA0D06480g	LAMI0E14554g	SAKL0G03432g	KLTH0F15136g
L.A1	A1LA02-071556g	2	+	134	1085	LANO0H21506g	LAME0F10198g	ZYRO0D11110g	LAWA0B08328g	LACI0H22012g	LAFE0F04170g	LADA0B04170g	LAFA0D06502g	LAMI0H03840g	SAKL0G03454g	KLTH0F15114g
L.A1	A1LA02-071578g	2	+	135	1086	LANO0H21484g	LAME0F10176g	ZYRO0D11132g	LAWA0B08306g	LACI0H21990g	LAFE0F04192g	LADA0B04192g	LAFA0D06524g	LAMI0H03862g	SAKL0G03476g	KLTH0F15092g
L.A1	A1LA02-071600g	2	-	136	1087	LANO0H21462g	LAME0F10154g	ZYRO0D11154g	LAWA0B08284g	LACI0H21968g	LAFE0F04214g	LADA0B04214g	LAFA0D06546g	LAMI0H03884g	SAKL0G03498g	KLTH0F15070g
L.A1	A1LA02-071622g	2	+	137	1088	LANO0H21440g	LAME0F10132g	ZYRO0D11220g	LAWA0B08262g	LACI0H21946g	LAFE0F04236g	LADA0B04236g	LAFA0D06568g	LAMI0H03906g	SAKL0G03520g	KLTH0F15048g
L.A1	A1LA02-071666g	2	-	138	1089	LANO0H21396g	LAME0F10088g	ZYRO0D11264g	LAWA0B08218g	LACI0H21902g	LAFE0F04280g	LADA0B04280g	LAFA0D06590g	LAMI0H03928g	SAKL0G03564g	KLTH0F15004g
L.A1	A1LA02-071688g	2	+	139	1090	LANO0H21374g	LAME0F10066g	ZYRO0D11286g	LAWA0B08196g	LACI0H21880g	LAFE0F04302g	LADA0B04302g	LAFA0D06612g	LAMI0H03950g	SAKL0G03586g	KLTH0F14982g
L.A1	A1LA02-071710g	2	-	140	1091	LANO0H21352g	LAME0F10044g	ZYRO0D11308g	LAWA0B08174g	LACI0H21858g	LAFE0F04324g	LADA0B04324g	LAFA0D06634g	LAMI0H03972g	SAKL0G03608g	KLTH0F14960g
L.A1	A1LA02-071732g	2	+	141	1092	LANO0D02410g	LAME0H19020g	ZYRO0D11352g	LAWA0D11518g	LACI0C07646g	LAFE0F16138g	LADA0G14576g	LAFA0D02366g	LAMI0D10396g	SAKL0G03630g	KLTH0G02464g
L.A1	A1LA02-071754g	2	-	142	1093	LANO0D02432g	LAME0H18998g	ZYRO0D11374g	LAWA0D11474g	LACI0C07624g	LAFE0F16116g	LADA0G14554g	LAFA0D02388g	LAMI0D10418g	SAKL0G03674g	KLTH0G02508g
L.A1	A1LA02-071776g	2	+	143	1094	LANO0D02454g	LAME0H18976g	ZYRO0D11396g	LAWA0D11452g	LACI0C07602g	LAFE0F16094g	LADA0G14532g	LAFA0D02410g	LAMI0D10440g	SAKL0G03696g	KLTH0G02530g
L.A1	A1LA02-071798g	2	-	144	1095	LANO0D02476g	LAME0H18954g	ZYRO0D11418g	LAWA0D11430g	LACI0C07580g	LAFE0F16072g	LADA0G14510g	LAFA0D02432g	LAMI0D10462g	SAKL0G03718g	KLTH0G02552g
L.A1	A1LA02-071820g	2	-	145	1096	LANO0D02498g	LAME0H18932g	ZYRO0D11440g	LAWA0D11408g	LACI0C07558g	LAFE0F16050g	LADA0G14488g	LAFA0D02454g	LAMI0D10484g	SAKL0G03740g	KLTH0G02574g
L.A1	A1LA02-071842g	2	+	146	1097	LANO0D02520g	LAME0H18910g	ZYRO0D11462g	LAWA0D11342g	LACI0C07536g	LAFE0F16028g	LADA0G14466g	LAFA0D02476g	LAMI0D10506g	SAKL0G03762g	KLTH0G02596g
L.A1	A1LA02-071864g	2	-	147	1098	LANO0D02542g	LAME0H18888g	ZYRO0D11484g	LAWA0D11320g	LACI0C07514g	LAFE0F16006g	LADA0G14444g	LAFA0D02498g	LAMI0D10528g	SAKL0G03784g	KLTH0G02618g
L.A1	A1LA02-071886g	2	+	148	1099	LANO0D02564g	LAME0H18866g	ZYRO0D11506g	LAWA0D11298g	LACI0C07492g	LAFE0F15984g	LADA0G14422g	LAFA0D02520g	LAMI0D10550g	SAKL0G03806g	KLTH0G02640g
L.A1	A1LA02-071908g	2	+	149	1100	LANO0D02586g	LAME0H18844g	ZYRO0D11528g		LACI0C07470g	LAFE0F15962g	LADA0G14400g	LAFA0D02542g	LAMI0D10572g	SAKL0G03828g	KLTH0G02662g
L.A1	A1LA02-071930g	2	-	150	1101	LANO0D02608g	LAME0H18822g	ZYRO0D11550g	LAWA0D11254g	LACI0C07448g	LAFE0F15940g	LADA0G14378g	LAFA0D02564g	LAMI0D10594g	SAKL0G03850g	KLTH0G02684g
L.A1	A1LA02-071952g	2	+	151	1102	LANO0D02630g	LAME0H18800g	ZYRO0D11572g	LAWA0D11232g	LACI0C07426g	LAFE0F15918g	LADA0G14356g	LAFA0D02586g	LAMI0D10616g	SAKL0G03872g	KLTH0G02706g
L.A1	A1LA02-071974g	2	-	152	1103	LANO0D02652g	LAME0H18778g	ZYRO0D11594g	LAWA0D11210g	LACI0C07404g	LAFE0F15896g	LADA0G14334g	LAFA0D02608g	LAMI0D10638g	SAKL0G03894g	KLTH0G02728g
L.A1	A1LA02-071996g	2	+	153	1104	LANO0D02674g	LAME0H18756g	ZYRO0D11616g	LAWA0D11188g	LACI0C07382g	LAFE0F15874g	LADA0G14312g	LAFA0D02630g	LAMI0D10660g	SAKL0G03916g	KLTH0G02772g
L.A1	A1LA02-072018g	2	+	154	1105	LANO0D02696g	LAME0H18734g	ZYRO0D11638g	LAWA0D11166g	LACI0C07360g	LAFE0F15852g	LADA0G14290g	LAFA0D02652g	LAMI0D10682g	SAKL0G03938g	KLTH0G02794g
L.A1	A1LA02-072062g	2	+	155	1106	LANO0D02740g	LAME0D03268g	ZYRO0D11660g	LAWA0D11100g	LACI0C07316g	LAFE0F15808g	LADA0G14246g	LAFA0D02696g	LAMI0D10726g	SAKL0G03982g	KLTH0G02860g
L.A1	A1LA02-072084g	2	-	156	1107	LANO0D02762g	LAME0D03290g	ZYRO0D11682g	LAWA0D11078g	LACI0C07294g	LAFE0F15786g	LADA0G14224g	LAFA0D02718g	LAMI0D10748g	SAKL0G04004g	KLTH0G02882g
L.A1	A1LA02-072106g	2	+	157	1108	LANO0D02784g	LAME0D03312g	ZYRO0D11704g	LAWA0D11056g	LACI0C07272g	LAFE0F15764g	LADA0G14202g	LAFA0D02740g	LAMI0D10770g	SAKL0G04026g	KLTH0G02904g
L.A1	A1LA02-072128g	2	-	158	1109	LANO0D02806g	LAME0D03334g	ZYRO0D11726g	LAWA0D11034g	LACI0C07250g	LAFE0F15742g	LADA0G14180g	LAFA0D02762g	LAMI0D10792g	SAKL0G04048g	KLTH0G02926g
L.A1	A1LA02-072150g	2	+	159	1110	LANO0D02828g	LAME0D03356g	ZYRO0D11748g	LAWA0D11012g	LACI0C07228g	LAFE0F15720g	LADA0G14158g	LAFA0D02784g	LAMI0D10814g	SAKL0G04070g	KLTH0G02948g
L.A1	A1LA02-072172g	2	-	160	1111	LANO0D02850g	LAME0D03378g	ZYRO0D11770g	LAWA0D10990g	LACI0C07206g	LAFE0F15698g	LADA0G14136g	LAFA0D02806g	LAMI0D10836g	SAKL0G04092g	KLTH0G02970g
L.A1	A1LA02-072194g	2	+	161	1112	LANO0D02872g	LAME0D03400g	ZYRO0D11792g	LAWA0D10968g	LACI0C07184g	LAFE0F15676g	LADA0G14114g	LAFA0D02828g	LAMI0D10858g	SAKL0G04114g	KLTH0G02992g
L.A1	A1LA02-072216g	2	-	162	1113	LANO0D02894g	LAME0D03422g	ZYRO0D11836g	LAWA0D10946g	LACI0C07162g	LAFE0F15654g	LADA0G14092g	LAFA0D02894g	LAMI0D10880g	SAKL0G04136g	KLTH0G03014g
L.A1	A1LA02-072238g	2	-	163	1114	LANO0D02916g	LAME0D03444g	ZYRO0D11902g	LAWA0D10924g	LACI0C07140g	LAFE0F15632g	LADA0G14070g	LAFA0D02872g	LAMI0D10902g	SAKL0G04158g	KLTH0G03036g
L.A1	A1LA02-072260g	2	+	164	1115	LANO0D02960g	LAME0D03466g	ZYRO0D11924g	LAWA0D10902g	LACI0C07118g	LAFE0F15610g	LADA0G14004g	LAFA0D02894g	LAMI0D10924g	SAKL0G04180g	KLTH0G03058g
L.A1	A1LA02-072282g	2	-	165	1116	LANO0D02982g	LAME0D03488g	ZYRO0D11946g	LAWA0D10880g	LACI0C07096g	LAFE0F15588g	LADA0G13982g	LAFA0D02916g	LAMI0D10946g	SAKL0G04202g	KLTH0G03080g
L.A1	A1LA02-072304g	2	+	166	1117	LANO0D03004g	LAME0D03510g	ZYRO0D11968g	LAWA0D10858g	LACI0C07074g	LAFE0F15566g	LADA0G13960g	LAFA0D02938g	LAMI0D10968g	SAKL0G04224g	KLTH0G03102g
L.A1	A1LA02-072326g	2	-	167	1118	LANO0D03026g	LAME0D03532g	ZYRO0D11990g	LAWA0D10836g	LACI0C07052g	LAFE0F15544g	LADA0G13938g	LAFA0D02960g	LAMI0D10990g	SAKL0G04246g	KLTH0G03124g
L.A1	A1LA02-072348g	2	-	168	1119	LANO0D03048g	LAME0D03554g	ZYRO0D12012g	LAWA0D10814g	LACI0C07030g	LAFE0F15522g	LADA0G13916g	LAFA0D02982g	LAMI0D11012g	SAKL0G04268g	KLTH0G03146g
L.A1	A1LA02-072370g	2	+	169	1120	LANO0D03070g	LAME0D03576g	ZYRO0D12034g	LAWA0D10792g	LACI0C07008g	LAFE0F15500g	LADA0G13894g	LAFA0D03004g	LAMI0D11034g	SAKL0G04290g	KLTH0G03168g
L.A1	A1LA02-072392g	2	-	170	1121	LANO0D03092g	LAME0D03598g	ZYRO0D12056g	LAWA0D10770g	LACI0C06986g	LAFE0F15478g	LADA0G13872g	LAFA0D03026g	LAMI0D11056g	SAKL0G04312g	KLTH0G03190g
L.A1	A1LA02-072414g	2	+	171	1122	LANO0D03114g	LAME0D03620g	ZYRO0D12078g	LAWA0D10748g	LACI0C06964g	LAFE0F15456g	LADA0G13696g	LAFA0D03048g	LAMI0D11078g	SAKL0G04334g	KLTH0G03212g
L.A1	A1LA02-072436g	2	-	172	1123	LANO0D03136g	LAME0D03642g	ZYRO0D12100g	LAWA0D10726g	LACI0C06942g	LAFE0F15434g	LADA0G13718g	LAFA0D03070g	LAMI0D11100g	SAKL0G04356g	KLTH0G03234g
L.A1	A1LA02-072458g	2	-	173	1124	LANO0D03158g	LAME0D03664g	ZYRO0D12122g	LAWA0D10704g	LACI0C06920g	LAFE0F15412g	LADA0G13740g	LAFA0D03092g	LAMI0D11122g	SAKL0G04378g	KLTH0G03256g
L.A1	A1LA02-072480g	2	-	174	1125	LANO0D03202g	LAME0D03686g	ZYRO0D12144g	LAWA0D10660g	LACI0C06898g	LAFE0F15390g	LADA0G13762g	LAFA0D03114g	LAMI0D11144g	SAKL0G04422g	KLTH0G03300g
L.A1	A1LA02-072502g	2	-	175	1126	LANO0D03224g	LAME0D03708g	ZYRO0D12188g	LAWA0D10638g	LACI0C06876g	LAFE0F15368g	LADA0G13784g	LAFA0D03136g	LAMI0D11166g	SAKL0G04444g	KLTH0G03322g
L.A1	A1LA02-072524g	2	+	176	1127	LANO0D03246g	LAME0D03730g	ZYRO0D12210g	LAWA0D10616g	LACI0C06854g	LAFE0F15346g	LADA0G13806g	LAFA0D03158g	LAMI0D11188g	SAKL0G04466g	KLTH0G03344g
L.A1	A1LA02-072546g	2	-	177	1128	LANO0D03268g	LAME0D03752g	ZYRO0D12232g	LAWA0D10594g	LACI0C06832g	LAFE0F15324g	LADA0G13828g	LAFA0D03180g	LAMI0D11210g	SAKL0G04488g	KLTH0G03366g
L.A1	A1LA02-072590g	2	+	178	1129	LANO0D03312g	LAME0D03818g	ZYRO0D12298g	LAWA0D10506g	LACI0C06766g	LAFE0F15258g	LADA0G13674g	LAFA0D03224g	LAMI0D11276g	SAKL0G04554g	KLTH0G03476g
L.A1	A1LA02-072612g	2	-	179	1130	LANO0D03334g	LAME0D03840g	ZYRO0D12320g	LAWA0D10484g	LACI0C06744g	LAFE0F15236g	LADA0G13652g	LAFA0D03246g	LAMI0D11298g	SAKL0G04576g
L.A1	A1LA02-072634g	2	-	180	1131	LANO0D03356g	LAME0D03862g	ZYRO0D12342g	LAWA0D10462g	LACI0C06722g	LAFE0F15214g	LADA0G13630g	LAFA0D03268g	LAMI0D11320g	SAKL0G04598g	KLTH0G03498g
L.A1	A1LA02-072656g	2	+	181	1132	LANO0D03378g	LAME0D03884g	ZYRO0D12364g	LAWA0D10440g	LACI0C06700g	LAFE0F15192g	LADA0G13608g	LAFA0D03290g	LAMI0D11342g	SAKL0G04620g	KLTH0G03520g
L.A1	A1LA02-072678g	2	-	182	1133	LANO0D03488g	LAME0G13718g	ZYRO0D12386g	LAWA0D10308g	LACI0C06590g	LAFE0F15082g	LADA0G13498g	LAFA0E21792g	LAMI0D11452g	SAKL0G04642g	KLTH0G03674g
L.A1	A1LA02-072700g	2	+	183	1134	LANO0D03466g	LAME0G13696g	ZYRO0D12408g	LAWA0D10330g	LACI0C06612g	LAFE0F15104g	LADA0G13520g	LAFA0E21770g	LAMI0D11430g	SAKL0G04664g	KLTH0G03652g
L.A1	A1LA02-072722g	2	+	184	1135	LANO0D03444g	LAME0G13674g	ZYRO0D12430g	LAWA0D10352g	LACI0C06634g	LAFE0F15126g	LADA0G13542g	LAFA0E21748g	LAMI0D11408g	SAKL0G04708g	KLTH0G03630g
L.A1	A1LA02-072766g	2	+	185	1136	LANO0D03400g	LAME0G13630g	ZYRO0D12452g	LAWA0D10396g	LACI0C06678g	LAFE0F15170g	LADA0G13586g	LAFA0E21704g	LAMI0D11364g	SAKL0G04752g	KLTH0G03586g
L.A1	A1LA02-072788g	2	+	186	1137	LANO0D03510g		ZYRO0D12496g	LAWA0D10286g	LACI0C06568g	LAFE0F15060g				SAKL0G04862g
L.A1	A1LA02-072810g	2	+	187	1138			ZYRO0D12518g		LACI0C06546g	LAFE0F15038g			LAMI0D11496g	SAKL0G04884g	KLTH0G03718g
L.A1	A1LA02-072832g	2	+	188	1139	LANO0D03532g	LAME0G13762g	ZYRO0D12540g	LAWA0D10264g	LACI0C06524g	LAFE0F15016g	LADA0G13454g	LAFA0E21836g	LAMI0D11518g	SAKL0G04906g	KLTH0G03740g
L.A1	A1LA02-072854g	2	-	189	1140	LANO0D03554g	LAME0G13784g	ZYRO0D12562g		LACI0C06502g	LAFE0F14994g	LADA0G13432g	LAFA0E21858g	LAMI0D11540g	SAKL0G04928g	KLTH0G03762g
L.A1	A1LA02-072876g	2	-	190	1141	LANO0D03576g	LAME0G13806g	ZYRO0D12584g	LAWA0D10220g	LACI0C06480g	LAFE0F14972g	LADA0G13234g	LAFA0E21880g	LAMI0D11562g	SAKL0G04950g	KLTH0G03784g
L.A1	A1LA02-072898g	2	+	191	1142	LANO0D03642g	LAME0G13850g	ZYRO0D12606g	LAWA0D10176g	LACI0C06458g	LAFE0F14950g	LADA0G13256g	LAFA0F06546g	LAMI0D11584g	SAKL0G04972g	KLTH0G03806g
L.A1	A1LA02-072920g	2	+	192	1143	LANO0D03664g	LAME0G13872g	ZYRO0D12628g	LAWA0D10154g	LACI0C06436g	LAFE0F14906g	LADA0G13278g	LAFA0F06568g	LAMI0D11606g	SAKL0G04994g	KLTH0G03828g
L.A1	A1LA02-072942g	2	+	193	1144	LANO0D03686g	LAME0G13894g	ZYRO0D12650g	LAWA0D10132g	LACI0C06414g	LAFE0F14884g	LADA0G13300g	LAFA0F06590g	LAMI0D11628g	SAKL0G05016g	KLTH0G03850g
L.A1	A1LA02-072964g	2	-	194	1145	LANO0D03708g	LAME0G13916g	ZYRO0D12672g	LAWA0D10110g	LACI0C06392g	LAFE0F14862g	LADA0G13322g	LAFA0F06612g	LAMI0D11650g	SAKL0G05038g	KLTH0G03872g
L.A1	A1LA02-072986g	2	+	195	1146	LANO0D03730g	LAME0G13938g	ZYRO0D12694g	LAWA0D10088g	LACI0C06370g	LAFE0F14840g	LADA0G13344g	LAFA0F06634g	LAMI0D11672g	SAKL0G05060g	KLTH0G03894g
L.A1	A1LA02-073008g	2	+	196	1147	LANO0D03752g	LAME0G13960g	ZYRO0D12716g		LACI0C06348g	LAFE0F14818g	LADA0G13366g	LAFA0F06678g	LAMI0D11694g	SAKL0G05082g	KLTH0G03916g
L.A1	A1LA02-073030g	2	-	197	1148	LANO0D03774g	LAME0G13982g	ZYRO0D12738g		LACI0C06326g	LAFE0F14796g	LADA0G13388g	LAFA0F06700g	LAMI0D11716g	SAKL0G05104g	KLTH0G03938g
L.A1	A1LA02-073052g	2	-	198	1149	LANO0D03796g	LAME0G14004g	ZYRO0D12782g		LACI0C06304g	LAFE0F14774g	LADA0G13410g	LAFA0F06722g	LAMI0D11738g	SAKL0G05126g	KLTH0G03960g
L.A1	A1LA02-073074g	2	+	199	1150	LANO0D03818g	LAME0G14026g	ZYRO0D12760g	LAWA0D10022g	LACI0C06282g	LAFE0F14752g	LADA0G13212g	LAFA0F06744g	LAMI0D11760g	SAKL0G05148g	KLTH0G03982g
L.A1	A1LA02-073096g	2	-	200	1151	LANO0D03840g	LAME0G14048g	ZYRO0D12804g		LACI0C06260g	LAFE0F14730g	LADA0G13190g	LAFA0F06766g	LAMI0D11782g	SAKL0G05170g	KLTH0G04004g
L.A1	A1LA02-073118g	2	+	201	1152	LANO0D03862g	LAME0G14070g	ZYRO0D12826g		LACI0C06238g	LAFE0F14708g	LADA0G13168g	LAFA0F06788g	LAMI0D11804g	SAKL0G05192g	KLTH0G04048g
L.A1	A1LA02-073140g	2	-	202	1153	LANO0D03884g	LAME0G14092g	ZYRO0D12848g	LAWA0D09956g	LACI0C06216g	LAFE0F14686g	LADA0G13146g	LAFA0F06810g	LAMI0D11826g	SAKL0G05214g	KLTH0G04070g
L.A1	A1LA02-073162g	2	-	203	1154	LANO0D03906g	LAME0G14114g	ZYRO0D12870g	LAWA0D09934g	LACI0C06194g	LAFE0F14664g	LADA0G13124g	LAFA0F06832g	LAMI0D11848g	SAKL0G05236g	KLTH0G04092g
L.A1	A1LA02-073184g	2	+	204	1155	LANO0D03928g	LAME0G14136g	ZYRO0D12892g	LAWA0D09912g	LACI0C06172g	LAFE0F14642g	LADA0G13102g	LAFA0F06854g	LAMI0D11870g	SAKL0G05258g	KLTH0G04114g
L.A1	A1LA02-073206g	2	-	205	1156	LANO0D03950g	LAME0G14158g	ZYRO0D12914g		LACI0C06150g	LAFE0F14620g	LADA0G13080g	LAFA0F06876g	LAMI0D11892g	SAKL0G05280g	KLTH0G04136g
L.A1	A1LA02-073228g	2	-	206	1157	LANO0D03972g	LAME0G14180g	ZYRO0D12936g	LAWA0D09868g	LACI0C06128g	LAFE0F14598g	LADA0G13058g	LAFA0F06898g	LAMI0D11914g	SAKL0G05302g	KLTH0G04158g
L.A1	A1LA02-073250g	2	+	207	1158	LANO0D03994g	LAME0G14202g	ZYRO0D12958g	LAWA0D09846g	LACI0C06106g	LAFE0F14576g	LADA0G13036g	LAFA0F06920g	LAMI0D11936g	SAKL0G05324g	KLTH0G04180g
L.A1	A1LA02-073272g	2	+	208	1159	LANO0D04016g	LAME0G14224g	ZYRO0D12980g	LAWA0D09802g	LACI0C06084g	LAFE0F14554g	LADA0G13014g	LAFA0F06942g	LAMI0D11958g	SAKL0G05346g	KLTH0G04202g
L.A1	A1LA02-073294g	2	-	209	1160	LANO0D04038g	LAME0G14246g	ZYRO0D13002g	LAWA0D09780g	LACI0C06062g	LAFE0F14532g	LADA0G12992g	LAFA0F06964g	LAMI0D11980g	SAKL0G05368g	KLTH0G04224g
L.A1	A1LA02-073316g	2	+	210	1161	LANO0H12574g	LAME0H12002g	ZYRO0D13024g	LAWA0D09758g	LACI0C06040g	LAFE0F14510g	LADA0G08680g	LAFA0E14708g	LAMI0D12002g	SAKL0G05390g	KLTH0G04246g
L.A1	A1LA02-073338g	2	+	211	1162	LANO0H12552g	LAME0H11980g	ZYRO0D13046g	LAWA0D09736g	LACI0C06018g	LAFE0F14488g	LADA0G08658g	LAFA0E14686g	LAMI0D12024g	SAKL0G05412g	KLTH0G04268g
L.A1	A1LA02-073360g	2	-	212	1163	LANO0H12530g	LAME0H11958g	ZYRO0D13068g	LAWA0D09714g	LACI0C05996g	LAFE0F14466g	LADA0G08636g	LAFA0E14664g	LAMI0D12046g	SAKL0G05434g	KLTH0G04290g
L.A1	A1LA02-073382g	2	+	213	1164	LANO0H12508g	LAME0H11936g	ZYRO0D13090g		LACI0C05974g	LAFE0F14444g	LADA0G08548g	LAFA0E14642g	LAMI0G11364g	SAKL0G05456g	KLTH0G04312g
L.A1	A1LA02-073404g	2	-	214	1165	LANO0H12486g	LAME0H11914g	ZYRO0D13112g	LAWA0D09670g	LACI0C05952g	LAFE0F14422g	LADA0G08526g	LAFA0E14620g	LAMI0G11342g	SAKL0G05478g	KLTH0G04334g
L.A1	A1LA02-073426g	2	+	215	1166	LANO0H12464g	LAME0H11892g	ZYRO0D13134g	LAWA0D09648g	LACI0C05930g	LAFE0F14400g	LADA0G08504g	LAFA0E14598g	LAMI0G11320g	SAKL0G05500g	KLTH0G04356g
L.A1	A1LA02-073448g	2	-	216	1167	LANO0H12442g	LAME0H11870g	ZYRO0D13156g	LAWA0D09626g	LACI0C05908g	LAFE0F14378g	LADA0G08482g	LAFA0E14576g	LAMI0G11298g	SAKL0G05522g	KLTH0G04378g
L.A1	A1LA02-073470g	2	+	217	1168	LANO0H12420g	LAME0H11848g	ZYRO0D13178g	LAWA0D09604g	LACI0C05886g	LAFE0F14356g	LADA0G08460g		LAMI0G11276g	SAKL0G05544g	KLTH0G04400g
L.A1	A1LA02-073492g	2	+	218	1169	LANO0H12398g	LAME0H11826g	ZYRO0D13200g	LAWA0D09582g	LACI0C05864g	LAFE0F14334g	LADA0G08438g	LAFA0E14532g	LAMI0G11254g	SAKL0G05566g	KLTH0G04422g
L.A1	A1LA02-073514g	2	-	219	1170	LANO0H12376g	LAME0H11804g	ZYRO0D13222g	LAWA0D09560g	LACI0C05842g	LAFE0F14312g	LADA0G08416g	LAFA0E14510g	LAMI0G11232g	SAKL0G05588g	KLTH0G04444g
L.A1	A1LA02-073536g	2	+	220	1171	LANO0H12354g	LAME0H11782g	ZYRO0D13244g	LAWA0D09538g	LACI0C05820g	LAFE0F14290g	LADA0G08394g	LAFA0E14488g	LAMI0G11210g	SAKL0G05610g	KLTH0G04466g
L.A1	A1LA02-073558g	2	-	221	1172	LANO0H12332g	LAME0H11760g	ZYRO0D13266g	LAWA0D09516g	LACI0C05798g	LAFE0F14268g	LADA0G08372g	LAFA0E14466g	LAMI0G11188g	SAKL0G05632g	KLTH0G04488g
L.A1	A1LA02-073580g	2	+	222	1173	LANO0H12310g	LAME0H11738g	ZYRO0D13398g	LAWA0D09494g	LACI0C05776g	LAFE0F14246g	LADA0G08350g	LAFA0E14444g	LAMI0G11166g	SAKL0G05654g	KLTH0G04510g
L.A1	A1LA02-073602g	2	-	223	1174	LANO0H12288g	LAME0H11716g	ZYRO0D13420g	LAWA0D09472g	LACI0C05754g	LAFE0F14224g	LADA0G08328g	LAFA0E14422g	LAMI0G11144g	SAKL0G05676g	KLTH0G04532g
L.A1	A1LA02-073624g	2	+	224	1175	LANO0H12266g	LAME0H11694g	ZYRO0D13464g	LAWA0D09450g	LACI0C05732g	LAFE0F14202g	LADA0G08306g	LAFA0E14400g		SAKL0G05742g	KLTH0G04554g
L.A1	A1LA02-073646g	2	-	225	1176	LANO0H12244g	LAME0H11672g	ZYRO0D13486g	LAWA0D09428g	LACI0C05710g	LAFE0F14180g	LADA0G08284g	LAFA0E14378g	LAMI0G11122g	SAKL0G05764g	KLTH0G04576g
L.A1	A1LA02-073668g	2	+	226	1177	LANO0H12222g	LAME0H11650g	ZYRO0D13508g	LAWA0D09406g	LACI0C05688g	LAFE0F14158g	LADA0G08262g	LAFA0E14356g	LAMI0G11100g	SAKL0G05786g	KLTH0G04598g
L.A1	A1LA02-073690g	2	-	227	1178	LANO0H12200g	LAME0H11628g	ZYRO0D13530g	LAWA0D09384g	LACI0C05666g	LAFE0F14136g	LADA0G08240g	LAFA0E14334g	LAMI0G11078g	SAKL0G05830g	KLTH0G04620g
L.A1	A1LA02-073712g	2	+	228	1179	LANO0H12178g	LAME0H11606g	ZYRO0D13552g	LAWA0D09362g	LACI0C05644g	LAFE0F14114g	LADA0G08218g	LAFA0E14312g	LAMI0G11056g	SAKL0G05852g	KLTH0G04642g
L.A1	A1LA02-073734g	2	+	229	1180	LANO0H12156g	LAME0H11584g	ZYRO0D13574g	LAWA0D09340g	LACI0C05622g	LAFE0F14092g	LADA0G08196g	LAFA0E14290g	LAMI0G11034g	SAKL0G05874g	KLTH0G04664g
L.A1	A1LA02-073756g	2	-	230	1181	LANO0H12134g	LAME0H11562g	ZYRO0D13596g	LAWA0D09318g	LACI0C05600g		LADA0G08174g	LAFA0E14268g	LAMI0G11012g	SAKL0G05896g	KLTH0G04686g
L.A1	A1LA02-073778g	2	+	231	1182	LANO0H12112g	LAME0H11540g	ZYRO0D13618g	LAWA0D09296g	LACI0C05578g	LAFE0F14026g	LADA0G08152g	LAFA0E14246g	LAMI0G10990g	SAKL0G05918g	KLTH0G04708g
L.A1	A1LA02-073800g	2	-	232	1183	LANO0H12090g	LAME0H11518g	ZYRO0D13640g	LAWA0D09274g	LACI0C05556g	LAFE0F14004g	LADA0G08130g	LAFA0E14224g	LAMI0G10968g	SAKL0G05940g	KLTH0G04730g
L.A1	A1LA02-073822g	2	-	233	1184	LANO0H12068g	LAME0H11496g	ZYRO0D13662g	LAWA0D09252g	LACI0C05534g	LAFE0F13982g	LADA0G08108g	LAFA0E14202g	LAMI0G10946g	SAKL0G05962g	KLTH0G04752g
L.A1	A1LA02-073844g	2	-	234	1185	LANO0H12046g	LAME0H11474g	ZYRO0D13684g	LAWA0D09230g	LACI0C05512g	LAFE0F13960g	LADA0G08086g	LAFA0E14180g	LAMI0G10924g	SAKL0G05984g	KLTH0G04774g
L.A1	A1LA02-073866g	2	-	235	1186	LANO0H12024g	LAME0H11452g	ZYRO0D13706g	LAWA0D09208g	LACI0C05490g	LAFE0F13938g	LADA0G08064g	LAFA0E14158g	LAMI0G10902g	SAKL0G06006g	KLTH0G04796g
L.A1	A1LA02-073888g	2	+	236	1187	LANO0H12002g	LAME0H11430g	ZYRO0D13728g	LAWA0D09186g	LACI0C05468g	LAFE0F13916g	LADA0G08042g	LAFA0E14136g	LAMI0G10880g	SAKL0G06028g	KLTH0G04818g
L.A1	A1LA02-073910g	2	-	237	1188	LANO0H11980g	LAME0H11408g	ZYRO0D13750g	LAWA0D09164g	LACI0C05446g	LAFE0F13894g	LADA0G08020g	LAFA0E14114g	LAMI0G10858g	SAKL0G06050g	KLTH0G04840g
L.A1	A1LA02-073932g	2	+	238	1189	LANO0H11958g	LAME0H11386g	ZYRO0D13772g	LAWA0D09142g	LACI0C05424g	LAFE0F13872g	LADA0G07998g	LAFA0E14092g	LAMI0G10836g	SAKL0G06072g	KLTH0G04862g
L.A1	A1LA02-073954g	2	+	239	1190	LANO0H11936g	LAME0H11364g	ZYRO0D13926g	LAWA0D09120g	LACI0C05402g	LAFE0F13850g	LADA0G07976g	LAFA0E14070g	LAMI0G10814g	SAKL0G06094g	KLTH0G04884g
L.A1	A1LA02-073976g	2	-	240	1191	LANO0H11892g	LAME0H11320g	ZYRO0D13816g		LACI0C05358g	LAFE0F13806g	LADA0G07932g	LAFA0E14026g	LAMI0G10770g	SAKL0G06116g	KLTH0G04928g
L.A1	A1LA02-073998g	2	+	241	1192	LANO0H11870g	LAME0H11298g	ZYRO0D13838g	LAWA0D09054g	LACI0C05336g	LAFE0F13784g	LADA0G07888g	LAFA0E14004g	LAMI0G10748g	SAKL0G06138g	KLTH0G04950g
L.A1	A1LA02-074020g	2	-	242	1193	LANO0H11848g	LAME0H11276g	ZYRO0D13860g	LAWA0D09032g	LACI0C05314g	LAFE0F13762g	LADA0G07866g	LAFA0E13982g	LAMI0G10726g	SAKL0G06160g	KLTH0G04972g
L.A1	A1LA02-074042g	2	+	243	1194	LANO0H11826g	LAME0H11254g	ZYRO0D13882g	LAWA0D09010g	LACI0C05292g	LAFE0F13740g	LADA0G07844g	LAFA0E13960g	LAMI0G10704g	SAKL0G06182g	KLTH0G04994g
L.A1	A1LA02-074064g	2	-	244	1195	LANO0H11804g	LAME0H11232g	ZYRO0D13904g	LAWA0D08988g	LACI0C05270g	LAFE0F13718g	LADA0G07822g	LAFA0E13938g	LAMI0G10682g	SAKL0G06204g	KLTH0G05016g
L.A1	A1LA02-074086g	2	+	245	1196	LANO0H11782g	LAME0H11210g	ZYRO0D13926g	LAWA0D08966g	LACI0C05248g	LAFE0F13696g	LADA0G07800g	LAFA0E13916g	LAMI0G10660g	SAKL0G06226g	KLTH0G05038g
L.A1	A1LA02-074108g	2	+	246	1197	LANO0H11760g	LAME0H11188g	ZYRO0D13948g	LAWA0D08944g	LACI0C05226g	LAFE0F13674g	LADA0G07778g	LAFA0E13894g	LAMI0G10638g	SAKL0G06248g	KLTH0G05060g
L.A1	A1LA02-074130g	2	+	247	1198	LANO0H11738g	LAME0H11166g	ZYRO0D13970g	LAWA0D08922g	LACI0C05204g	LAFE0F13652g	LADA0G07756g	LAFA0E13872g	LAMI0H03070g	SAKL0G06270g	KLTH0G05082g
L.A1	A1LA02-074152g	2	+	248	1199	LANO0H11716g	LAME0H11144g	ZYRO0D13992g	LAWA0D08900g	LACI0C05182g	LAFE0F13630g	LADA0G07734g	LAFA0E13850g	LAMI0H03048g	SAKL0G06292g	KLTH0G05104g
L.A1	A1LA02-074174g	2	+	249	1200	LANO0H11694g	LAME0H11122g	ZYRO0D14014g	LAWA0D08878g	LACI0C05160g	LAFE0F13608g	LADA0G07712g	LAFA0E13828g	LAMI0H03026g	SAKL0G06314g	KLTH0G05126g
L.A1	A1LA02-074196g	2	-	250	1201	LANO0H11672g	LAME0H11100g	ZYRO0D14036g	LAWA0D08856g	LACI0C05138g	LAFE0F13586g	LADA0G07690g	LAFA0E13806g	LAMI0H03004g	SAKL0G06336g	KLTH0G05148g
L.A1	A1LA02-074218g	2	-	251	1202	LANO0H11650g	LAME0H11078g	ZYRO0C06820g	LAWA0D08834g	LACI0C05116g	LAFE0F13564g	LADA0G07668g	LAFA0E13784g	LAMI0H02982g	SAKL0G06358g	KLTH0G05170g
L.A1	A1LA02-074240g	2	-	252	1203	LANO0H11628g	LAME0H11056g	ZYRO0C06798g	LAWA0D08812g	LACI0C05094g	LAFE0F13542g	LADA0G07646g	LAFA0E13762g	LAMI0H02960g	SAKL0G06380g	KLTH0G05192g
L.A1	A1LA02-074262g	2	+	253	1204	LANO0H11606g	LAME0H11034g	ZYRO0C06776g	LAWA0D08790g	LACI0C05072g	LAFE0F13520g	LADA0G07624g	LAFA0E13740g	LAMI0H02938g	SAKL0G06402g	KLTH0G05214g
L.A1	A1LA02-074284g	2	-	254	1205	LANO0H11584g	LAME0H11012g	ZYRO0C06754g	LAWA0D08746g	LACI0C05050g	LAFE0F13498g	LADA0G07602g	LAFA0E13718g	LAMI0H02916g	SAKL0G06424g	KLTH0G05236g
L.A1	A1LA02-074306g	2	-	255	1206	LANO0H11562g	LAME0H10968g	ZYRO0C06732g	LAWA0D08724g	LACI0C05028g	LAFE0F13476g	LADA0G07580g	LAFA0E13696g	LAMI0H02894g	SAKL0G06446g	KLTH0G05258g
L.A1	A1LA02-074328g	2	+	256	1207	LANO0H11540g	LAME0H10946g	ZYRO0C06710g	LAWA0D08702g	LACI0C05006g	LAFE0F13454g	LADA0G07558g	LAFA0E13674g	LAMI0H02872g	SAKL0G06468g	KLTH0G05280g
L.A1	A1LA02-074350g	2	-	257	1208	LANO0H11518g	LAME0H10924g	ZYRO0C06688g	LAWA0D08680g	LACI0C04984g	LAFE0F13432g	LADA0G07536g	LAFA0E13652g	LAMI0H02850g	SAKL0G06490g	KLTH0G05302g
L.A1	A1LA02-074372g	2	-	258	1209	LANO0H11496g	LAME0H10902g	ZYRO0C06666g	LAWA0D08658g	LACI0C04962g	LAFE0F13410g	LADA0G07514g	LAFA0E13630g	LAMI0H02828g	SAKL0G06512g	KLTH0G05324g
L.A1	A1LA02-074394g	2	+	259	1210	LANO0H11474g	LAME0H10880g	ZYRO0C06644g	LAWA0D08636g	LACI0C04940g	LAFE0F13388g	LADA0G07492g	LAFA0E13608g	LAMI0H02806g	SAKL0G06534g	KLTH0G05346g
L.A1	A1LA02-074416g	2	+	260	1211	LANO0H11452g	LAME0H10858g	ZYRO0C06622g	LAWA0D08614g	LACI0C04918g	LAFE0F13366g	LADA0G07470g	LAFA0E13586g	LAMI0H02784g	SAKL0G06556g	KLTH0G05368g
L.A1	A1LA02-074438g	2	+	261	1212	LANO0H11430g	LAME0H10836g	ZYRO0C06600g	LAWA0D08592g	LACI0C04896g	LAFE0F13344g	LADA0G07448g	LAFA0E13564g	LAMI0H02762g	SAKL0G06578g	KLTH0G05390g
L.A1	A1LA02-074460g	2	-	262	1213	LANO0H11408g	LAME0H10814g	ZYRO0C06556g		LACI0C04852g	LAFE0F13300g	LADA0G07426g	LAFA0E13542g	LAMI0H02740g	SAKL0G06644g	KLTH0G05434g
L.A1	A1LA02-074482g	2	+	263	1214	LANO0H11386g	LAME0H10792g	ZYRO0C06534g		LACI0C04830g	LAFE0F13278g	LADA0G07404g	LAFA0E13520g	LAMI0H02718g	SAKL0G06666g	KLTH0G05456g
L.A1	A1LA02-074504g	2	+	264	1215	LANO0H11364g	LAME0H10770g	ZYRO0C06512g	LAWA0D08526g	LACI0C04808g	LAFE0F13256g	LADA0G07382g	LAFA0E13498g	LAMI0H02696g	SAKL0G06688g	KLTH0G05467g
L.A1	A1LA02-074526g	2	+	265	1216	LANO0H11342g	LAME0H10748g	ZYRO0B04730g	LAWA0D08482g	LACI0C04786g	LAFE0F13234g	LADA0G07360g	LAFA0E13476g	LAMI0H02674g	SAKL0G06754g	KLTH0G05500g
L.A1	A1LA02-074548g	2	+	266	1217	LANO0H11320g	LAME0H10726g	ZYRO0B04752g	LAWA0D08460g	LACI0C04764g	LAFE0F13212g	LADA0G07338g	LAFA0E13454g	LAMI0H02652g	SAKL0G06776g	KLTH0G05522g
L.A1	A1LA02-074570g	2	+	267	1218	LANO0H11298g	LAME0H10704g	ZYRO0A05412g	LAWA0D08438g	LACI0C04742g	LAFE0F13190g	LADA0G07316g	LAFA0E13432g	LAMI0H02630g	SAKL0G06798g	KLTH0G05544g
L.A1	A1LA02-074614g	2	+	268	1219			ZYRO0A05434g	LAWA0D08394g	LACI0C04698g	LAFE0F13146g		LAFA0E13366g	LAMI0H02586g	SAKL0G06842g	KLTH0G05588g
L.A1	A1LA02-074636g	2	-	269	1220	LANO0H11254g	LAME0H10660g	ZYRO0A05456g	LAWA0D08372g	LACI0C04676g	LAFE0F13124g	LADA0G07272g	LAFA0E13388g	LAMI0H02564g	SAKL0G06864g	KLTH0G05610g
L.A1	A1LA02-074658g	2	-	270	1221	LANO0H11232g	LAME0H10638g	ZYRO0A05478g	LAWA0D08350g	LACI0C04654g	LAFE0F13102g	LADA0G07250g	LAFA0E13366g	LAMI0H02542g	SAKL0G06886g	KLTH0G05632g
L.A1	A1LA02-074680g	2	-	271	1222	LANO0H11210g	LAME0H10616g	ZYRO0A05500g	LAWA0D08328g	LACI0C04632g	LAFE0F13080g	LADA0G07228g	LAFA0E13344g	LAMI0H02520g	SAKL0G06908g	KLTH0G05654g
L.A1	A1LA02-074702g	2	-	272	1223	LANO0H11188g	LAME0H10594g	ZYRO0A05522g	LAWA0D08306g	LACI0C04610g	LAFE0F13058g	LADA0G07206g	LAFA0E13322g	LAMI0H02498g	SAKL0G06930g	KLTH0G05676g
L.A1	A1LA02-074724g	2	+	273	1224	LANO0H11166g	LAME0H10572g	ZYRO0A05544g	LAWA0D08284g	LACI0C04588g	LAFE0F13036g	LADA0G07184g	LAFA0E13300g	LAMI0H02476g	SAKL0G06952g	KLTH0G05698g
L.A1	A1LA02-074746g	2	+	274	1225	LANO0H11144g	LAME0H10550g	ZYRO0A05566g	LAWA0D08262g	LACI0C04566g	LAFE0F13014g	LADA0G07162g	LAFA0E13278g	LAMI0H02454g	SAKL0G06974g	KLTH0G05720g
L.A1	A1LA02-074768g	2	+	275	1226	LANO0B04280g	LAME0A01398g	ZYRO0A05588g	LAWA0B01948g	LACI0F03026g	LAFE0D08526g	LADA0G01112g	LAFA0A06942g	LAMI0B04192g	SAKL0G06996g	KLTH0E02090g
L.A1	A1LA02-074790g	2	-	276	1227	LANO0B04302g	LAME0A01376g	ZYRO0A05610g	LAWA0B01970g	LACI0F03048g	LAFE0D08504g	LADA0G01134g	LAFA0A06964g	LAMI0B04170g	SAKL0G07018g	KLTH0E02112g
L.A1	A1LA02-074812g	2	+	277	1228	LANO0B04324g	LAME0A01354g	ZYRO0A05632g	LAWA0B01992g	LACI0F03070g	LAFE0D08482g	LADA0G01156g	LAFA0A06986g	LAMI0B04148g	SAKL0G07040g	KLTH0E02134g
L.A1	A1LA02-074834g	2	-	278	1229	LANO0B04346g	LAME0A01332g	ZYRO0A05654g	LAWA0B02014g	LACI0F03092g	LAFE0D08460g	LADA0G01178g	LAFA0A07008g	LAMI0B04126g	SAKL0G07062g	KLTH0E02156g
L.A1	A1LA02-074856g	2	+	279	1230	LANO0B04368g	LAME0A01310g	ZYRO0A05676g	LAWA0B02036g	LACI0F03114g	LAFE0D08438g	LADA0G01200g	LAFA0A07030g	LAMI0B04104g	SAKL0G07084g	KLTH0E02178g
L.A1	A1LA02-074878g	2	-	280	1231	LANO0B04390g	LAME0A01288g	ZYRO0G15818g	LAWA0B02058g		LAFE0D08416g	LADA0G01222g	LAFA0A07052g	LAMI0B04082g	SAKL0G07106g	KLTH0E02200g
L.A1	A1LA02-074922g	2	-	281	1232	LANO0B04434g	LAME0G17964g	ZYRO0G15862g	LAWA0B02102g	LACI0F03180g	LAFE0D08372g	LADA0G01288g	LAFA0G17480g		SAKL0G07150g	KLTH0E02244g
L.A1	A1LA02-074944g	2	-	282	1233			ZYRO0G15950g	LAWA0B02146g		LAFE0D08350g			LAMI0B03818g	SAKL0G07172g
L.A1	A1LA02-074966g	2	+	283	1234	LANO0B04456g	LAME0G17986g	ZYRO0G15906g	LAWA0B02168g	LACI0F03224g	LAFE0D08328g	LADA0G01310g	LAFA0G17502g	LAMI0B04016g	SAKL0G07194g	KLTH0E02310g
L.A1	A1LA02-074988g	2	+	284	1235	LANO0B04478g	LAME0G18008g	ZYRO0G15950g	LAWA0B02190g	LACI0F03268g	LAFE0D08306g	LADA0G01332g	LAFA0G17524g	LAMI0B03994g	SAKL0G07260g	KLTH0E02354g
L.A1	A1LA02-075010g	2	-	285	1236	LANO0B04500g	LAME0G18030g	ZYRO0G15972g		LACI0F03290g	LAFE0D08284g	LADA0G01354g	LAFA0G17546g	LAMI0B03972g	SAKL0G07282g	KLTH0E02376g
L.A1	A1LA02-075032g	2	-	286	1237	LANO0B04522g	LAME0G18052g	ZYRO0C11110g	LAWA0B02234g	LACI0F03312g	LAFE0D08262g	LADA0G01376g	LAFA0G17590g	LAMI0B03950g	SAKL0G07304g	KLTH0E02398g
L.A1	A1LA02-075054g	2	-	287	1238	LANO0B04544g	LAME0G18074g	ZYRO0C11132g		LACI0F03334g	LAFE0D08240g	LADA0G01398g	LAFA0G17612g	LAMI0B03928g	SAKL0G07326g	KLTH0E02420g
L.A1	A1LA02-075076g	2	-	288	1239	LANO0B04566g	LAME0G18096g	ZYRO0C11154g		LACI0F03356g	LAFE0D08218g	LADA0G01420g	LAFA0G17634g	LAMI0B03906g	SAKL0G07348g	KLTH0E02442g
L.A1	A1LA02-075098g	2	+	289	1240	LANO0B04588g	LAME0G18118g	ZYRO0C11176g		LACI0F03378g	LAFE0D08196g	LADA0G01442g	LAFA0G17656g	LAMI0B03884g	SAKL0G07370g	KLTH0E02464g
L.A1	A1LA02-075120g	2	-	290	1241	LANO0B04610g	LAME0G18140g	ZYRO0C11198g	LAWA0B02322g	LACI0F03400g	LAFE0D08174g	LADA0G01464g	LAFA0G17678g	LAMI0B03862g	SAKL0G07392g	KLTH0E02486g
L.A1	A1LA02-075142g	2	+	291	1242	LANO0B04632g	LAME0G18162g	ZYRO0A06512g	LAWA0B02344g	LACI0F03422g	LAFE0D08152g	LADA0G01486g	LAFA0G17700g	LAMI0B03840g	SAKL0G07414g	KLTH0E02508g
L.A1	A1LA02-075186g	2	-	292	1243	LANO0B04676g	LAME0G18184g	ZYRO0A06534g	LAWA0B02388g	LACI0F03444g	LAFE0D08130g	LADA0G01508g	LAFA0G17722g	LAMI0B03796g	SAKL0G07458g	KLTH0E02530g
L.A1	A1LA02-075230g	2	+	293	1244	LANO0B04720g	LAME0G18228g	ZYRO0A06578g	LAWA0B02410g	LACI0F03488g	LAFE0D08108g	LADA0F12354g	LAFA0G17766g	LAMI0B03752g	SAKL0G07524g	KLTH0E02596g
L.A1	A1LA02-075252g	2	+	294	1245	LANO0B04742g	LAME0G18250g	ZYRO0A06600g		LACI0F03510g	LAFE0D08086g	LADA0F12332g	LAFA0G17788g	LAMI0B03730g	SAKL0G07546g	KLTH0E02618g
L.A1	A1LA02-075274g	2	+	295	1246	LANO0B04764g	LAME0G18272g	ZYRO0A06622g	LAWA0B02454g	LACI0F03532g	LAFE0D08042g	LADA0F12310g	LAFA0G17810g	LAMI0B03686g	SAKL0G07568g	KLTH0E02640g
L.A1	A1LA02-075296g	2	-	296	1247	LANO0B04786g	LAME0G18316g	ZYRO0A06644g	LAWA0B02476g	LACI0F03554g	LAFE0D08020g	LADA0F12288g	LAFA0G17854g	LAMI0B03664g	SAKL0G07590g	KLTH0E02684g
L.A1	A1LA02-075318g	2	+	297	1248	LANO0B04808g	LAME0G18338g	ZYRO0A06666g	LAWA0B02498g	LACI0F03598g	LAFE0D07998g	LADA0F12266g	LAFA0G17876g	LAMI0C01222g	SAKL0G07612g	KLTH0E02728g
L.A1	A1LA02-075362g	2	+	298	1249	LANO0B04852g	LAME0G18404g	ZYRO0A06688g	LAWA0B02542g	LACI0F03642g	LAFE0D07910g	LADA0F12178g	LAFA0G17920g	LAMI0C01178g	SAKL0G07678g	KLTH0E02772g
L.A1	A1LA02-075406g	2	+	299	1250	LANO0B04896g	LAME0G18448g	ZYRO0A06710g		LACI0F03708g	LAFE0D07888g	LADA0F12222g	LAFA0G17964g	LAMI0C01156g	SAKL0G07722g	KLTH0E02816g
L.A1	A1LA02-075428g	2	+	300	1251	LANO0B04918g	LAME0G18470g	ZYRO0A06754g	LAWA0B02630g	LACI0F03752g	LAFE0D07844g	LADA0F12090g	LAFA0G17986g	LAMI0C01134g	SAKL0G07766g	KLTH0E02860g
L.A1	A1LA02-075472g	2	+	301	1252	LANO0B04962g	LAME0G18514g	ZYRO0A06776g		LACI0F03796g	LAFE0D07800g	LADA0F12046g	LAFA0G18030g	LAMI0C01090g	SAKL0G07810g	KLTH0E02904g
L.A1	A1LA02-075494g	2	+	302	1253	LANO0B04984g	LAME0G18536g	ZYRO0A06798g		LACI0F03818g	LAFE0D07778g	LADA0F12024g	LAFA0G18052g	LAMI0C01068g	SAKL0G07832g	KLTH0E02926g
L.A1	A1LA02-075516g	2	+	303	1254	LANO0B05006g	LAME0G18558g	ZYRO0A06820g	LAWA0B02718g	LACI0F03840g	LAFE0D07756g	LADA0F12002g	LAFA0G18074g	LAMI0C01046g	SAKL0G07854g	KLTH0E02948g
L.A1	A1LA02-075538g	2	-	304	1255	LANO0B05028g	LAME0G18580g	ZYRO0A06842g	LAWA0B02740g	LACI0F03862g	LAFE0D07734g	LADA0F11980g	LAFA0G18096g	LAMI0C01024g	SAKL0G07876g	KLTH0E02970g
L.A1	A1LA02-075582g	2	+	305	1256	LANO0B05072g	LAME0G18624g	ZYRO0A06864g	LAWA0B02784g	LACI0F03906g	LAFE0D07690g	LADA0F11936g	LAFA0G18140g	LAMI0C03884g	SAKL0G07920g	KLTH0E03014g
L.A1	A1LA02-075604g	2	-	306	1257	LANO0B05094g	LAME0G18646g	ZYRO0A06886g	LAWA0B02806g	LACI0F03928g	LAFE0D07668g	LADA0F11914g	LAFA0G18162g	LAMI0C03906g	SAKL0G07942g	KLTH0E03036g
L.A1	A1LA02-075626g	2	-	307	1258	LANO0B05116g	LAME0G18668g	ZYRO0A06908g	LAWA0B02828g	LACI0F03950g	LAFE0D07646g	LADA0F11892g	LAFA0G18184g	LAMI0C03928g	SAKL0G07964g	KLTH0E03058g
L.A1	A1LA02-075648g	2	-	308	1259	LANO0B05138g	LAME0G18712g	ZYRO0A06930g	LAWA0B02850g	LACI0F03972g	LAFE0D07624g	LADA0F11870g	LAFA0G18206g	LAMI0C03950g	SAKL0G07986g	KLTH0E03410g
L.A1	A1LA02-075714g	2	-	309	1260	LANO0B05226g	LAME0F13982g	ZYRO0A06974g	LAWA0B02894g	LACI0F04060g	LAFE0D07558g	LADA0F11804g	LAFA0G18272g	LAMI0C04038g	SAKL0G08052g	KLTH0E03454g
L.A1	A1LA02-075736g	2	-	310	1261	LANO0B05248g	LAME0F14004g	ZYRO0A06996g	LAWA0B02916g	LACI0F04082g	LAFE0D07536g	LADA0F11782g	LAFA0G18294g	LAMI0C04060g	SAKL0G08074g	KLTH0E03476g
L.A1	A1LA02-075758g	2	-	311	1262	LANO0B05270g	LAME0F14026g	ZYRO0A07018g	LAWA0B02938g	LACI0F04126g	LAFE0D07514g	LADA0F11760g	LAFA0G18316g	LAMI0C04082g	SAKL0G08118g	KLTH0E03520g
L.A1	A1LA02-075780g	2	-	312	1263	LANO0B05292g	LAME0F14048g	ZYRO0D10890g	LAWA0B02960g	LACI0F04258g	LAFE0D07492g	LADA0F11738g	LAFA0G18338g	LAMI0C04104g	SAKL0G08140g	KLTH0E03542g
L.A1	A1LA02-075802g	2	+	313	1264	LANO0B05314g	LAME0F13982g	ZYRO0D10868g	LAWA0B02982g	LACI0F04280g	LAFE0D07470g	LADA0F11716g	LAFA0G18360g	LAMI0C04126g	SAKL0G08162g	KLTH0E03564g
L.A1	A1LA02-075846g	2	-	314	1265	LANO0B05358g	LAME0F14114g	ZYRO0D10824g	LAWA0B03026g	LACI0F04324g	LAFE0D07426g	LADA0F11672g	LAFA0G18404g	LAMI0C04170g	SAKL0G08206g	KLTH0E03608g
L.A1	A1LA02-075868g	2	-	315	1266	LANO0B05380g	LAME0F14136g	ZYRO0D10802g	LAWA0B03048g	LACI0F04346g	LAFE0D07404g	LADA0F11650g	LAFA0G18426g	LAMI0C04192g	SAKL0G08228g	KLTH0E03630g
L.A1	A1LA02-075890g	2	+	316	1267	LANO0B05402g	LAME0F14158g	ZYRO0D10252g	LAWA0B03070g	LACI0F04368g	LAFE0D07382g	LADA0F11628g	LAFA0G18448g	LAMI0C04214g	SAKL0G08250g	KLTH0E03652g
L.A1	A1LA02-075912g	2	-	317	1268	LANO0B05424g	LAME0F14180g	ZYRO0D10274g	LAWA0B03092g	LACI0F04390g	LAFE0D07360g	LADA0F11606g	LAFA0G18470g	LAMI0C04236g	SAKL0G08272g	KLTH0E03674g
L.A1	A1LA02-075934g	2	-	318	1269	LANO0B05446g	LAME0F14202g	ZYRO0D10296g		LACI0F04412g	LAFE0D07338g	LADA0F11584g	LAFA0G18492g	LAMI0C04258g	SAKL0G08294g	KLTH0E03696g
L.A1	A1LA02-075956g	2	-	319	1270	LANO0B05468g	LAME0F14224g	ZYRO0D10318g		LACI0F04434g	LAFE0D07316g	LADA0F11562g	LAFA0G18514g	LAMI0C04280g	SAKL0G08316g	KLTH0E03718g
L.A1	A1LA02-075978g	2	+	320	1271	LANO0B05490g		ZYRO0D10340g	LAWA0B03158g	LACI0F04456g	LAFE0D07250g	LADA0F11584g			SAKL0G08338g	KLTH0E03740g
L.A1	A1LA02-076000g	2	+	321	1272	LANO0B05512g	LAME0F14246g	ZYRO0D10362g	LAWA0B03180g	LACI0F04478g	LAFE0D07294g	LADA0F11540g	LAFA0G18536g	LAMI0C04302g	SAKL0G08360g	KLTH0E03762g
L.A1	A1LA02-076022g	2	+	322	1273	LANO0B05534g	LAME0F14268g	ZYRO0D10384g	LAWA0B03202g	LACI0F04500g	LAFE0D07272g	LADA0F11518g	LAFA0G18558g	LAMI0C04324g	SAKL0G08382g	KLTH0E03784g
L.A1	A1LA02-076044g	2	+	323	1274	LANO0B05556g	LAME0F14290g	ZYRO0D10406g	LAWA0B03224g	LACI0F04522g	LAFE0D07250g	LADA0F11496g	LAFA0G18580g	LAMI0C04346g	SAKL0G08404g	KLTH0E03806g
L.A1	A1LA02-076066g	2	+	324	1275	LANO0B05578g	LAME0F14312g	ZYRO0D10450g	LAWA0B03246g	LACI0F04544g	LAFE0D07228g	LADA0F11474g	LAFA0G18602g		SAKL0G08426g	KLTH0E03817g
L.A1	A1LA02-076088g	2	+	325	1276	LANO0B05600g	LAME0F14334g	ZYRO0D10472g	LAWA0B03268g	LACI0F04566g	LAFE0D07206g	LADA0F11452g	LAFA0G18624g	LAMI0C04368g	SAKL0G08448g	KLTH0E03828g
L.A1	A1LA02-076110g	2	-	326	1277	LANO0B05622g	LAME0F14356g	ZYRO0D10494g	LAWA0B03290g	LACI0F04588g	LAFE0D07184g	LADA0F11430g	LAFA0G18646g	LAMI0C04390g	SAKL0G08470g	KLTH0E03850g
L.A1	A1LA02-076132g	2	+	327	1278	LANO0B05666g	LAME0F14378g	ZYRO0D10516g	LAWA0B03312g	LACI0F04610g	LAFE0D07162g	LADA0F11408g	LAFA0G18668g	LAMI0C04412g	SAKL0G08492g	KLTH0E03872g
L.A1	A1LA02-076154g	2	-	328	1279	LANO0B05688g	LAME0F14400g	ZYRO0D10538g	LAWA0B03334g	LACI0F04632g	LAFE0D07140g	LADA0F11386g	LAFA0G18690g	LAMI0C04434g	SAKL0G08514g	KLTH0E03894g
L.A1	A1LA02-076176g	2	+	329	1280	LANO0B05710g	LAME0F14422g	ZYRO0D10560g	LAWA0B03356g	LACI0F04654g	LAFE0D07118g	LADA0F11364g	LAFA0G18734g	LAMI0C04456g	SAKL0G08536g	KLTH0E03916g
L.A1	A1LA02-076198g	2	+	330	1281	LANO0B05732g	LAME0F14444g	ZYRO0D10582g	LAWA0B03378g	LACI0F04676g	LAFE0D07096g	LADA0F11342g	LAFA0G18756g	LAMI0C04478g	SAKL0G08558g	KLTH0E03938g
L.A1	A1LA02-076220g	2	-	331	1282	LANO0B05754g	LAME0F14466g	ZYRO0D10604g	LAWA0B03400g	LACI0F04698g	LAFE0D07074g	LADA0F11320g	LAFA0G18778g	LAMI0C04500g	SAKL0G08580g	KLTH0E03960g
L.A1	A1LA02-076242g	2	+	332	1283	LANO0B05776g	LAME0F14488g	ZYRO0D10626g	LAWA0B03422g	LACI0F04720g	LAFE0D07052g	LADA0F11298g	LAFA0G18800g	LAMI0C04522g	SAKL0G08602g	KLTH0E03982g
L.A1	A1LA02-076264g	2	-	333	1284	LANO0B05798g	LAME0F14510g	ZYRO0D10648g	LAWA0B03444g	LACI0F04742g	LAFE0D07030g	LADA0F11276g	LAFA0G18822g	LAMI0C04544g	SAKL0G08624g	KLTH0E04004g
L.A1	A1LA02-076286g	2	+	334	1285	LANO0B05820g		ZYRO0D10670g	LAWA0B03466g	LACI0F04764g	LAFE0D07008g	LADA0F11254g			SAKL0G08646g	KLTH0E04026g
L.A1	A1LA02-076308g	2	+	335	1286	LANO0G17128g	LAME0E12838g	ZYRO0D10692g	LAWA0H13124g	LACI0F13168g	LAFE0A03796g	LADA0B02124g	LAFA0G16996g	LAMI0C09274g	SAKL0G08668g	KLTH0H15026g
L.A1	A1LA02-076330g	2	-	336	1287	LANO0G17106g	LAME0E12816g	ZYRO0D10714g	LAWA0H13102g	LACI0F13146g	LAFE0A03818g	LADA0B02146g	LAFA0G16974g	LAMI0C09252g	SAKL0G08690g	KLTH0H15004g
L.A1	A1LA02-076374g	2	-	337	1288	LANO0G17062g	LAME0E12772g	ZYRO0D10736g		LACI0F13102g	LAFE0A03862g	LADA0B02190g	LAFA0G16930g	LAMI0C09208g	SAKL0G08734g	KLTH0H14960g
L.A1	A1LA02-076396g	2	-	338	1289	LANO0G17040g	LAME0E12750g	ZYRO0D10758g	LAWA0H13058g	LACI0F13080g	LAFE0A03884g	LADA0B02212g	LAFA0G16908g	LAMI0C09186g	SAKL0G08756g	KLTH0H14938g
L.A1	A1LA02-076418g	2	+	339	1290	LANO0G17018g	LAME0E12728g	ZYRO0D10230g	LAWA0H13036g	LACI0F13058g	LAFE0A03906g	LADA0B02234g	LAFA0G16886g	LAMI0C09164g	SAKL0G08778g	KLTH0H14916g
L.A1	A1LA02-076440g	2	-	340	1291	LANO0G16996g	LAME0E12706g	ZYRO0D10208g	LAWA0H13014g	LACI0F13036g	LAFE0A03928g	LADA0B02256g	LAFA0G16864g	LAMI0C09142g	SAKL0G08800g	KLTH0H14894g
L.A1	A1LA02-076462g	2	+	341	1292	LANO0G16974g	LAME0E12684g	ZYRO0D10186g	LAWA0H12992g	LACI0F13014g	LAFE0A03950g	LADA0B02278g	LAFA0G16842g	LAMI0C09120g	SAKL0G08822g	KLTH0H14872g
L.A1	A1LA02-076484g	2	-	342	1293	LANO0G16952g	LAME0E12662g	ZYRO0D10164g	LAWA0H12970g	LACI0F12992g	LAFE0A03972g	LADA0B02300g	LAFA0G16820g	LAMI0C09098g	SAKL0G08844g	KLTH0H14850g
L.A1	A1LA02-076506g	2	+	343	1294	LANO0G16930g	LAME0E12640g	ZYRO0D10142g	LAWA0H12948g	LACI0F12970g	LAFE0A03994g	LADA0B02322g	LAFA0G16798g	LAMI0C09076g	SAKL0G08866g	KLTH0H14828g
L.A1	A1LA02-076528g	2	-	344	1295	LANO0G16908g		ZYRO0D10120g	LAWA0H12926g	LACI0F12948g	LAFE0A04016g	LADA0B02344g		LAMI0C09054g	SAKL0G08888g	KLTH0H14806g
L.A1	A1LA02-076572g	2	-	345	1296	LANO0G16864g	LAME0E12596g	ZYRO0C14454g	LAWA0H12882g	LACI0F12882g	LAFE0A04060g	LADA0B02388g	LAFA0G16754g	LAMI0C08944g	SAKL0G09108g	KLTH0H14740g
L.A1	A1LA02-076594g	2	-	346	1297	LANO0G16842g	LAME0E12574g	ZYRO0C14432g	LAWA0H12860g	LACI0C03774g	LAFE0F12222g	LADA0B02410g	LAFA0G16732g	LAMI0C08966g	SAKL0G09130g	KLTH0H14718g
L.A1	A1LA02-076616g	2	+	347	1298	LANO0G16820g	LAME0E12552g	ZYRO0C14410g	LAWA0H12838g	LACI0C03752g	LAFE0F12200g	LADA0B02432g	LAFA0G16710g	LAMI0C08988g	SAKL0G09152g	KLTH0H14696g
L.A1	A1LA02-076638g	2	-	348	1299	LANO0G16798g	LAME0E12530g	ZYRO0C14388g	LAWA0H12816g	LACI0C03730g	LAFE0F12178g	LADA0B02454g	LAFA0G16688g	LAMI0C09010g	SAKL0G09174g	KLTH0H14674g
L.A1	A1LA02-076660g	2	-	349	1300	LANO0G16776g	LAME0E11606g	ZYRO0C14366g	LAWA0H12794g	LACI0C03708g	LAFE0F12156g	LADA0B02476g	LAFA0G15786g	LAMI0C08922g	SAKL0G09196g	KLTH0H14652g
L.A1	A1LA02-076682g	2	+	350	1301	LANO0G16754g	LAME0E11584g	ZYRO0C14344g	LAWA0H12772g	LACI0C03686g	LAFE0F12145g	LADA0B02498g	LAFA0G15764g		SAKL0G09218g	KLTH0H14630g
L.A1	A1LA02-076704g	2	-	351	1302	LANO0G16732g	LAME0E12508g	ZYRO0C14322g	LAWA0H12750g	LACI0C03664g	LAFE0F12134g	LADA0B02520g	LAFA0G16666g	LAMI0C08900g	SAKL0G09240g	KLTH0H14608g
L.A1	A1LA02-076726g	2	+	352	1303			ZYRO0C14300g	LAWA0C07052g						SAKL0G09262g
L.A1	A1LA02-076748g	2	+	353	1304	LANO0G06502g	LAME0G06436g	ZYRO0C14278g	LAWA0C06876g	LACI0D06568g	LAFE0B10770g	LADA0E03752g	LAFA0G06590g	LAMI0H03136g	SAKL0G09284g	KLTH0F07062g
L.A1	A1LA02-076770g	2	-	354	1305	LANO0G06524g	LAME0G06458g	ZYRO0C14256g	LAWA0C06898g	LACI0D06546g	LAFE0B10748g	LADA0E03774g	LAFA0G06612g	LAMI0H03158g	SAKL0G09306g	KLTH0F07084g
L.A1	A1LA02-076792g	2	+	355	1306	LANO0G06546g	LAME0G06480g	ZYRO0C14234g	LAWA0C06920g	LACI0D06524g	LAFE0B10726g	LADA0E03796g	LAFA0G06634g	LAMI0H03180g	SAKL0G09328g	KLTH0F07106g
L.A1	A1LA02-076814g	2	-	356	1307	LANO0G06568g	LAME0G06502g	ZYRO0C14212g	LAWA0C06942g	LACI0D06502g	LAFE0B10704g	LADA0H10836g	LAFA0G06656g	LAMI0H03202g	SAKL0G09394g	KLTH0F07128g
L.A1	A1LA02-076836g	2	+	357	1308	LANO0G06590g	LAME0G06524g	ZYRO0C14190g	LAWA0C06810g	LACI0D06480g	LAFE0B10682g	LADA0H10858g	LAFA0G06678g	LAMI0H03224g	SAKL0G09416g	KLTH0F07150g
L.A1	A1LA02-076858g	2	+	358	1309	LANO0G06612g	LAME0G06546g	ZYRO0C14168g	LAWA0C06986g	LACI0D06458g	LAFE0B10660g	LADA0H10880g	LAFA0G06700g		SAKL0G09438g	KLTH0F07172g
L.A1	A1LA02-076880g	2	+	359	1310	LANO0G06634g	LAME0G06568g	ZYRO0C14146g	LAWA0C07008g	LACI0D06436g	LAFE0B10638g	LADA0H10902g	LAFA0G06722g	LAMI0H03246g	SAKL0G09460g	KLTH0F07194g
L.A1	A1LA02-076902g	2	+	360	1311	LANO0G06656g	LAME0G06590g	ZYRO0C14124g	LAWA0C07030g	LACI0D06414g	LAFE0B10616g	LADA0H10924g	LAFA0G06744g	LAMI0H03268g	SAKL0G09482g	KLTH0F07216g
L.A1	A1LA02-076946g	2	+	361	1312	LANO0G06700g	LAME0G06634g	ZYRO0C14102g	LAWA0C07074g	LACI0D06370g	LAFE0B10594g	LADA0H10968g	LAFA0G06788g	LAMI0H03312g	SAKL0G09526g	KLTH0F07260g
L.A1	A1LA02-076968g	2	-	362	1313	LANO0G06722g	LAME0G06656g	ZYRO0C14080g	LAWA0C07096g	LACI0D06348g	LAFE0B10572g	LADA0H10990g	LAFA0G06810g	LAMI0H03334g	SAKL0G09548g	KLTH0F07282g
L.A1	A1LA02-076990g	2	+	363	1314	LANO0G06744g	LAME0G06678g	ZYRO0C14058g	LAWA0C07118g	LACI0D06326g	LAFE0B10550g	LADA0H11012g	LAFA0G06832g	LAMI0H03356g	SAKL0G09570g	KLTH0F07304g
L.A1	A1LA02-077012g	2	-	364	1315	LANO0G06766g	LAME0G06700g	ZYRO0C14036g	LAWA0C07140g	LACI0D06304g	LAFE0B10528g	LADA0H11034g	LAFA0G06854g	LAMI0H03378g	SAKL0G09592g	KLTH0F07326g
L.A1	A1LA02-077056g	2	+	365	1316	LANO0G06810g	LAME0H01486g	ZYRO0C13992g	LAWA0C07206g	LACI0D06260g	LAFE0B10484g	LADA0H11100g	LAFA0G06898g	LAMI0H03422g	SAKL0G09658g	KLTH0F07392g
L.A1	A1LA02-077078g	2	+	366	1317	LANO0G06832g	LAME0H01508g	ZYRO0C13970g	LAWA0C07228g	LACI0D06238g	LAFE0B10462g	LADA0H11122g	LAFA0G06920g	LAMI0H03444g	SAKL0G09680g	KLTH0F07414g
L.A1	A1LA02-077100g	2	-	367	1318	LANO0G06854g	LAME0H01530g	ZYRO0C13948g	LAWA0C07250g	LACI0D06216g	LAFE0B10440g	LADA0H11144g	LAFA0G06942g	LAMI0H03466g	SAKL0G09702g	KLTH0F07436g
L.A1	A1LA02-077122g	2	+	368	1319	LANO0H10968g	LAME0H10418g	ZYRO0C13926g	LAWA0D08108g	LACI0C04434g	LAFE0F12882g	LADA0E06634g	LAFA0E13146g	LAMI0D04544g	SAKL0G09724g	KLTH0G05896g
L.A1	A1LA02-077144g	2	+	369	1320	LANO0H10946g	LAME0H10396g	ZYRO0C13904g	LAWA0D08086g	LACI0C04412g	LAFE0F12860g	LADA0E06656g	LAFA0E13124g	LAMI0D04522g	SAKL0G09746g	KLTH0G05918g
L.A1	A1LA02-077166g	2	+	370	1321			ZYRO0C13882g		LACI0C04390g	LAFE0F12838g				SAKL0G09768g
L.A1	A1LA02-077188g	2	+	371	1322	LANO0H10924g	LAME0H10374g	ZYRO0C13860g	LAWA0D08064g	LACI0C04368g	LAFE0F12816g	LADA0E06678g	LAFA0E13102g	LAMI0D04500g	SAKL0G09790g	KLTH0G05940g
L.A1	A1LA02-077210g	2	-	372	1323	LANO0H10902g	LAME0H10352g	ZYRO0C13838g	LAWA0D08042g	LACI0C04346g	LAFE0F12794g	LADA0E06700g	LAFA0E13080g	LAMI0D04478g	SAKL0G09812g	KLTH0G05962g
L.A1	A1LA02-077232g	2	-	373	1324	LANO0H10880g	LAME0H10330g	ZYRO0C13816g	LAWA0D08020g	LACI0C04324g	LAFE0F12772g	LADA0E06722g	LAFA0E13058g	LAMI0D04456g	SAKL0G09834g	KLTH0G05984g
L.A1	A1LA02-077254g	2	+	374	1325	LANO0H10858g	LAME0H10308g	ZYRO0C13794g	LAWA0D07998g	LACI0C04302g	LAFE0F12750g	LADA0E06744g	LAFA0E13036g	LAMI0D04434g	SAKL0G09856g	KLTH0G06006g
L.A1	A1LA02-077276g	2	-	375	1326	LANO0H10836g	LAME0H10286g	ZYRO0C13772g	LAWA0D07976g	LACI0C04280g	LAFE0F12728g	LADA0E06766g	LAFA0E13014g	LAMI0D04412g	SAKL0G09878g	KLTH0G06028g
L.A1	A1LA02-077320g	2	-	376	1327	LANO0H10792g	LAME0H10242g	ZYRO0C13750g	LAWA0G14048g	LACI0C04236g	LAFE0F12684g	LADA0E06810g	LAFA0E12970g	LAMI0D04368g	SAKL0G09922g	KLTH0G06050g
L.A1	A1LA02-077342g	2	+	377	1328	LANO0H10770g	LAME0H10220g	ZYRO0G17028g	LAWA0G14026g	LACI0C04214g	LAFE0F12662g	LADA0E06832g	LAFA0E12948g	LAMI0D04346g	SAKL0G09944g	KLTH0G06072g
L.A1	A1LA02-077364g	2	-	378	1329	LANO0H10748g	LAME0H10198g	ZYRO0G17006g	LAWA0G14004g	LACI0C04192g	LAFE0F12640g	LADA0E06854g	LAFA0E12926g	LAMI0D04324g	SAKL0G09966g	KLTH0G06094g
L.A1	A1LA02-077386g	2	-	379	1330	LANO0H10726g	LAME0H10176g	ZYRO0G16984g	LAWA0G13982g	LACI0C04170g	LAFE0F12618g	LADA0E06876g	LAFA0E12904g	LAMI0D04302g	SAKL0G09988g	KLTH0G06116g
L.A1	A1LA02-077408g	2	+	380	1331	LANO0H10704g	LAME0H10154g	ZYRO0G16962g	LAWA0G13960g	LACI0C04148g	LAFE0F12596g	LADA0E06898g	LAFA0E12882g	LAMI0D04280g	SAKL0G10010g	KLTH0G06138g
L.A1	A1LA02-077430g	2	+	381	1332	LANO0H10682g	LAME0H10132g	ZYRO0G16940g	LAWA0G13938g	LACI0C04126g	LAFE0F12574g	LADA0E06920g	LAFA0E12860g	LAMI0D04258g	SAKL0G10032g	KLTH0G06160g
L.A1	A1LA02-077452g	2	+	382	1333	LANO0H10638g	LAME0H10066g	ZYRO0G16918g	LAWA0G13916g	LACI0C04104g	LAFE0F12552g	LADA0E06986g	LAFA0E12794g	LAMI0D04236g	SAKL0G10054g	KLTH0G06182g
L.A1	A1LA02-077474g	2	+	383	1334	LANO0H10616g	LAME0H10088g	ZYRO0G16896g	LAWA0G13894g	LACI0C04082g	LAFE0F12530g	LADA0E06964g	LAFA0E12816g	LAMI0D04214g	SAKL0G10076g	KLTH0G06204g
L.A1	A1LA02-077496g	2	+	384	1335	LANO0H10594g	LAME0H10044g	ZYRO0G16874g	LAWA0G13872g	LACI0C04060g	LAFE0F12508g	LADA0E07008g	LAFA0E12772g	LAMI0D04192g	SAKL0G10098g	KLTH0G06226g
L.A1	A1LA02-077518g	2	+	385	1336	LANO0H10572g	LAME0H10022g	ZYRO0G16852g	LAWA0G13850g	LACI0C04038g	LAFE0F12486g	LADA0E07030g	LAFA0E12750g	LAMI0D04170g	SAKL0G10142g	KLTH0G06248g
L.A1	A1LA02-077562g	2	+	386	1337	LANO0H10550g	LAME0H10000g	ZYRO0G16830g	LAWA0G13828g	LACI0C03994g	LAFE0F12442g	LADA0E07052g	LAFA0E12728g	LAMI0D04126g	SAKL0G10186g	KLTH0G06270g
L.A1	A1LA02-077584g	2	-	387	1338	LANO0H10528g	LAME0H09978g	ZYRO0G16808g	LAWA0G13806g	LACI0C03972g	LAFE0F12420g	LADA0E07074g	LAFA0E12706g	LAMI0D04104g	SAKL0G10208g	KLTH0G06292g
L.A1	A1LA02-077606g	2	-	388	1339	LANO0H10506g	LAME0H09956g	ZYRO0G16786g	LAWA0G13784g	LACI0C03950g	LAFE0F12398g	LADA0E07096g	LAFA0E12684g	LAMI0D04082g	SAKL0G10230g	KLTH0G06314g
L.A1	A1LA02-077628g	2	+	389	1340	LANO0H10484g	LAME0H09934g	ZYRO0G16764g	LAWA0G13762g	LACI0C03928g	LAFE0F12376g	LADA0E07118g	LAFA0E12662g	LAMI0D04060g	SAKL0G10252g	KLTH0G06336g
L.A1	A1LA02-077650g	2	-	390	1341	LANO0H10462g	LAME0H09912g	ZYRO0G16742g	LAWA0G13740g	LACI0C03906g	LAFE0F12354g	LADA0E07140g	LAFA0E12640g	LAMI0D04038g	SAKL0G10274g	KLTH0G06358g
L.A1	A1LA02-077672g	2	+	391	1342	LANO0H10440g	LAME0H09890g	ZYRO0G16720g	LAWA0G13718g	LACI0C03884g	LAFE0F12332g	LADA0E07162g	LAFA0E12618g	LAMI0D04016g	SAKL0G10296g	KLTH0G06380g
L.A1	A1LA02-077694g	2	-	392	1343	LANO0H10418g	LAME0H09868g	ZYRO0G16698g	LAWA0G13696g	LACI0C03862g	LAFE0F12310g	LADA0E07184g	LAFA0E12596g	LAMI0D03994g	SAKL0G10318g	KLTH0G06402g
L.A1	A1LA02-077716g	2	+	393	1344	LANO0H10396g	LAME0H09846g	ZYRO0G16676g	LAWA0G13674g	LACI0C03840g	LAFE0F12288g	LADA0E07206g	LAFA0E12574g	LAMI0D03972g	SAKL0G10340g	KLTH0G06424g
L.A1	A1LA02-077738g	2	-	394	1345	LANO0H10374g	LAME0H09824g	ZYRO0G16654g	LAWA0G13652g	LACI0C03818g	LAFE0F12266g	LADA0E07228g	LAFA0E12552g	LAMI0D03950g	SAKL0G10362g	KLTH0G06446g
L.A1	A1LA02-077760g	2	-	395	1346	LANO0H10352g	LAME0H09802g	ZYRO0G16632g	LAWA0G13630g	LACI0C03796g	LAFE0F12244g	LADA0E07250g	LAFA0E12530g	LAMI0D03928g	SAKL0G10384g	KLTH0G06468g
L.A1	A1LA02-077782g	2	-	396	1347	LANO0H10330g	LAME0H09780g	ZYRO0G16610g	LAWA0G13608g	LACI0F12860g	LAFE0A04082g	LADA0E07272g	LAFA0E12508g	LAMI0D03906g	SAKL0G10406g	KLTH0G06490g
L.A1	A1LA02-077804g	2	+	397	1348	LANO0H10308g	LAME0H09758g	ZYRO0G16588g	LAWA0G13586g	LACI0F12838g	LAFE0A04104g	LADA0E07294g	LAFA0E12486g	LAMI0D03884g	SAKL0G10428g	KLTH0G06512g
L.A1	A1LA02-077826g	2	-	398	1349	LANO0H10286g	LAME0H09736g	ZYRO0G16566g	LAWA0G13564g	LACI0F12816g	LAFE0A04126g	LADA0E07316g	LAFA0E12464g	LAMI0D03862g	SAKL0G10450g	KLTH0G06534g
L.A1	A1LA02-077848g	2	+	399	1350	LANO0H10264g	LAME0H09714g	ZYRO0G16544g	LAWA0G13542g	LACI0F12772g	LAFE0A04148g	LADA0E07338g	LAFA0E12442g	LAMI0D03840g	SAKL0G10516g	KLTH0G06556g
L.A1	A1LA02-077870g	2	+	400	1351	LANO0H10242g	LAME0H09692g	ZYRO0G16522g	LAWA0G13498g	LACI0F12750g	LAFE0A04170g	LADA0E07360g	LAFA0E12420g	LAMI0D03818g	SAKL0G10538g	KLTH0G06578g
L.A1	A1LA02-077892g	2	+	401	1352	LANO0H10220g	LAME0H09670g	ZYRO0G16500g	LAWA0G13476g	LACI0F12728g	LAFE0A04192g	LADA0E07382g	LAFA0E12398g	LAMI0D03796g	SAKL0G10560g	KLTH0G06600g
L.A1	A1LA02-077914g	2	+	402	1353	LANO0H10198g	LAME0H09648g	ZYRO0G16478g	LAWA0G13454g	LACI0F12706g	LAFE0A04214g	LADA0E07404g	LAFA0E12376g	LAMI0D03774g	SAKL0G10582g	KLTH0G06622g
L.A1	A1LA02-077936g	2	-	403	1354	LANO0H10176g	LAME0H09626g	ZYRO0G16456g		LACI0F12684g	LAFE0A04236g	LADA0E07426g	LAFA0E12354g	LAMI0D03752g	SAKL0G10604g
L.A1	A1LA02-077958g	2	+	404	1355			ZYRO0G16434g							SAKL0G10626g
L.A1	A1LA02-077980g	2	-	405	1356	LANO0H10154g	LAME0H09604g	ZYRO0G16412g	LAWA0G13432g	LACI0F12662g	LAFE0A04258g	LADA0E07448g	LAFA0E12332g	LAMI0D03730g	SAKL0G10648g	KLTH0G06644g
L.A1	A1LA02-078002g	2	-	406	1357	LANO0H10132g	LAME0H09582g	ZYRO0G16390g	LAWA0G13410g	LACI0F12640g	LAFE0A04280g	LADA0E07470g	LAFA0E12310g	LAMI0D03708g	SAKL0G10670g	KLTH0G06666g
L.A1	A1LA02-078024g	2	+	407	1358	LANO0H10110g	LAME0H09560g	ZYRO0G16368g	LAWA0G13388g	LACI0F12618g	LAFE0A04302g	LADA0E07492g	LAFA0E12288g	LAMI0D03686g	SAKL0G10692g	KLTH0G06688g
L.A1	A1LA02-078046g	2	-	408	1359	LANO0H10088g	LAME0H09538g	ZYRO0G16346g	LAWA0G13366g	LACI0F12596g	LAFE0A04324g	LADA0E07514g	LAFA0E12266g	LAMI0D03664g	SAKL0G10714g	KLTH0G06710g
L.A1	A1LA02-078068g	2	-	409	1360	LANO0H10066g	LAME0H09516g	ZYRO0G16324g	LAWA0G13322g	LACI0F12574g	LAFE0A04346g	LADA0E07536g	LAFA0E12244g	LAMI0D03642g	SAKL0G10736g	KLTH0G06732g
L.A1	A1LA02-078090g	2	+	410	1361	LANO0H10044g	LAME0H09494g	ZYRO0G16302g				LADA0E07558g	LAFA0E12222g	LAMI0D03576g	SAKL0G10758g	KLTH0G06754g
L.A1	A1LA02-078112g	2	+	411	1362	LANO0H10022g	LAME0H09472g	ZYRO0G16258g	LAWA0G13300g	LACI0F12552g	LAFE0A04368g	LADA0E07580g	LAFA0E12200g	LAMI0D03554g	SAKL0G10780g	KLTH0G06776g
L.A1	A1LA02-078134g	2	+	412	1363	LANO0H10000g	LAME0D08218g	ZYRO0G16236g	LAWA0G13278g	LACI0F12530g	LAFE0A04390g	LADA0E07602g	LAFA0F18492g	LAMI0D03532g	SAKL0G10802g	KLTH0G06798g
L.A1	A1LA02-078156g	2	+	413	1364	LANO0H09978g	LAME0D08196g	ZYRO0G16214g	LAWA0G13256g	LACI0F12508g	LAFE0A04412g	LADA0E07624g	LAFA0F18514g	LAMI0D03510g	SAKL0G10824g	KLTH0G06820g
L.A1	A1LA02-078178g	2	+	414	1365	LANO0H09956g	LAME0D08174g	ZYRO0G16192g	LAWA0G13234g	LACI0F12486g	LAFE0A04434g	LADA0E07646g	LAFA0F18536g	LAMI0D03488g	SAKL0G10846g	KLTH0G06842g
L.A1	A1LA02-078200g	2	-	415	1366	LANO0H09934g	LAME0D08152g	ZYRO0G16170g	LAWA0G13212g	LACI0F12464g	LAFE0A04456g	LADA0E07668g	LAFA0F18558g	LAMI0D03466g	SAKL0G10868g	KLTH0G06864g
L.A1	A1LA02-078222g	2	+	416	1367	LANO0H09912g	LAME0D08130g	ZYRO0G16148g	LAWA0G13190g	LACI0F12442g	LAFE0A04478g	LADA0E07690g	LAFA0F18580g	LAMI0D03444g	SAKL0G10890g	KLTH0G06886g
L.A1	A1LA02-078266g	2	-	417	1368	LANO0H09868g	LAME0D08086g	ZYRO0G16126g	LAWA0G13146g	LACI0F12398g	LAFE0A04522g	LADA0E07734g	LAFA0F18624g	LAMI0D03400g	SAKL0G10934g	KLTH0G06930g
L.A1	A1LA02-078288g	2	+	418	1369	LANO0H09846g	LAME0D08064g	ZYRO0G16104g	LAWA0G13124g	LACI0F12376g	LAFE0A04544g	LADA0E07756g	LAFA0F18690g	LAMI0D03378g	SAKL0G10956g	KLTH0G06952g
L.A1	A1LA02-078310g	2	+	419	1370	LANO0H09824g	LAME0D08042g	ZYRO0G16082g	LAWA0G13102g	LACI0F12354g	LAFE0A04566g	LADA0E07778g	LAFA0F18712g	LAMI0D03356g	SAKL0G10978g	KLTH0G06974g
L.A1	A1LA02-078332g	2	+	420	1371	LANO0H09802g	LAME0D08020g	ZYRO0G16060g	LAWA0G13058g	LACI0F12310g	LAFE0A04610g	LADA0E07800g	LAFA0F18734g	LAMI0D03312g	SAKL0G11000g	KLTH0G07018g
L.A1	A1LA02-078354g	2	+	421	1372	LANO0H09780g	LAME0D07998g	ZYRO0G16038g	LAWA0G13036g	LACI0F12288g	LAFE0A04632g	LADA0E07822g	LAFA0F18756g	LAMI0D03290g	SAKL0G11022g	KLTH0G07040g
L.A1	A1LA02-078376g	2	-	422	1373	LANO0H09758g	LAME0D07976g	ZYRO0G16016g	LAWA0G13014g	LACI0F12266g	LAFE0A04654g	LADA0E07844g	LAFA0F18778g	LAMI0D03268g	SAKL0G11044g	KLTH0G07062g
L.A1	A1LA02-078398g	2	-	423	1374	LANO0H09736g	LAME0D07954g	ZYRO0G15994g	LAWA0G12992g	LACI0F12244g	LAFE0A04676g	LADA0E07866g	LAFA0F18822g	LAMI0D03246g	SAKL0G11066g	KLTH0G07084g
L.A1	A1LA02-078420g	2	+	424	1375	LANO0H09714g	LAME0D07932g	ZYRO0C11088g	LAWA0G12970g	LACI0F12222g	LAFE0A04698g	LADA0E07888g	LAFA0F18844g	LAMI0D03224g	SAKL0G11088g	KLTH0G07106g
L.A1	A1LA02-078442g	2	-	425	1376	LANO0H09692g	LAME0D07910g	ZYRO0C11066g	LAWA0G12948g	LACI0F12200g	LAFE0A04720g	LADA0E07910g	LAFA0F18866g	LAMI0D03202g	SAKL0G11110g	KLTH0G07128g
L.A1	A1LA02-078508g	2	+	426	1377	LANO0H09604g	LAME0D07844g	ZYRO0C11044g	LAWA0G12882g	LACI0F12134g	LAFE0A04786g	LADA0E07976g	LAFA0F18932g	LAMI0D03136g	SAKL0G11176g	KLTH0G07216g
L.A1	A1LA02-078530g	2	-	427	1378	LANO0H09582g	LAME0D07822g	ZYRO0C11022g	LAWA0G12860g	LACI0F12112g	LAFE0A04808g	LADA0E07998g	LAFA0F18954g	LAMI0D03114g	SAKL0G11198g	KLTH0G07238g
L.A1	A1LA02-078552g	2	+	428	1379	LANO0H09560g	LAME0D07800g	ZYRO0C11000g	LAWA0G12838g	LACI0F12090g	LAFE0A04830g	LADA0E08020g	LAFA0F18976g	LAMI0D03092g	SAKL0G11220g	KLTH0G07260g
L.A1	A1LA02-078574g	2	-	429	1380	LANO0H09538g	LAME0D07778g	ZYRO0C10978g	LAWA0G12816g	LACI0F12068g	LAFE0A04852g	LADA0E08042g	LAFA0F18998g	LAMI0D03070g	SAKL0G11231g	KLTH0G07271g
L.A1	A1LA02-078596g	2	+	430	1381	LANO0H09516g	LAME0D07756g	ZYRO0C10912g	LAWA0G12794g	LACI0F12024g	LAFE0A04874g	LADA0E08064g	LAFA0F19020g	LAMI0D03048g	SAKL0G11264g	KLTH0G07304g
L.A1	A1LA02-078618g	2	-	431	1382	LANO0H09494g	LAME0D07734g	ZYRO0C10890g	LAWA0G12772g	LACI0F12002g	LAFE0A04896g	LADA0E08086g	LAFA0F19042g	LAMI0D03026g	SAKL0G11286g	KLTH0G07326g
L.A1	A1LA02-078640g	2	-	432	1383	LANO0H09472g	LAME0D07712g	ZYRO0C10868g		LACI0F11980g	LAFE0A04918g	LADA0E08108g	LAFA0F19064g	LAMI0D03004g	SAKL0G11308g	KLTH0G07348g
L.A1	A1LA02-078662g	2	+	433	1384	LANO0H09450g	LAME0D07690g	ZYRO0C10846g	LAWA0G12728g	LACI0F11958g	LAFE0A04940g	LADA0E08130g	LAFA0F19086g	LAMI0D02982g	SAKL0G11330g	KLTH0G07370g
L.A1	A1LA02-078684g	2	-	434	1385	LANO0H09428g	LAME0D07668g	ZYRO0C10824g	LAWA0G12706g	LACI0F11936g	LAFE0A04962g	LADA0E08152g	LAFA0F19108g	LAMI0D02960g	SAKL0G11352g	KLTH0G07392g
L.A1	A1LA02-078706g	2	-	435	1386	LANO0H09406g	LAME0D07646g	ZYRO0C10802g		LACI0F11914g	LAFE0A04984g	LADA0E08174g	LAFA0F19130g	LAMI0D02938g	SAKL0G11374g	KLTH0G07414g
L.A1	A1LA02-078728g	2	+	436	1387	LANO0H09384g	LAME0D07624g	ZYRO0C10780g	LAWA0G12662g	LACI0F11892g	LAFE0A05006g	LADA0E08196g	LAFA0F19152g	LAMI0D02916g	SAKL0G11396g	KLTH0G07436g
L.A1	A1LA02-078750g	2	-	437	1388	LANO0H09362g	LAME0D07602g	ZYRO0C10758g	LAWA0G12640g	LACI0F11870g	LAFE0A05028g	LADA0E08218g	LAFA0F19174g	LAMI0D02894g	SAKL0G11418g	KLTH0G07458g
L.A1	A1LA02-078772g	2	-	438	1389	LANO0H09340g	LAME0D07580g	ZYRO0C10736g	LAWA0G12618g	LACI0F11848g	LAFE0A05050g	LADA0E08240g	LAFA0F19196g	LAMI0D02872g	SAKL0G11440g	KLTH0G07480g
L.A1	A1LA02-078794g	2	+	439	1390	LANO0H09318g	LAME0D07536g	ZYRO0A10538g	LAWA0G00452g	LACI0F11826g	LAFE0A05072g	LADA0E08262g	LAFA0F19218g	LAMI0F11870g	SAKL0G11462g	KLTH0G07502g
L.A1	A1LA02-078816g	2	+	440	1391	LANO0H09296g	LAME0D07514g	ZYRO0A10560g	LAWA0G00474g	LACI0F11804g	LAFE0A05094g	LADA0E08284g	LAFA0F19240g	LAMI0F11892g	SAKL0G11484g	KLTH0G07524g
L.A1	A1LA02-078838g	2	-	441	1392	LANO0H09274g	LAME0D07492g	ZYRO0A10582g	LAWA0G00496g	LACI0F11782g	LAFE0A05116g	LADA0E08306g	LAFA0F19262g	LAMI0F11914g	SAKL0G11506g	KLTH0G07546g
L.A1	A1LA02-078860g	2	+	442	1393	LANO0H09252g	LAME0D07470g	ZYRO0A10604g	LAWA0G00518g	LACI0F11760g	LAFE0A05138g	LADA0E08328g	LAFA0F19284g	LAMI0F11936g	SAKL0G11528g	KLTH0G07568g
L.A1	A1LA02-078882g	2	+	443	1394	LANO0H09230g	LAME0D07448g	ZYRO0A10626g	LAWA0G00540g	LACI0F11738g	LAFE0A05160g	LADA0E08350g	LAFA0F19306g	LAMI0F11958g	SAKL0G11550g	KLTH0G07590g
L.A1	A1LA02-078904g	2	-	444	1395	LANO0H09208g	LAME0D07426g	ZYRO0A10648g	LAWA0G00562g	LACI0F11716g	LAFE0A05182g	LADA0E08372g	LAFA0F19328g	LAMI0F11980g	SAKL0G11572g	KLTH0G07612g
L.A1	A1LA02-078926g	2	-	445	1396	LANO0H09186g	LAME0D07404g	ZYRO0A10670g	LAWA0G00584g	LACI0F11694g	LAFE0A05204g	LADA0E08394g	LAFA0F19350g	LAMI0F12002g	SAKL0G11594g	KLTH0G07634g
L.A1	A1LA02-078948g	2	+	446	1397	LANO0H09164g	LAME0D07382g	ZYRO0A10714g	LAWA0G00628g	LACI0F11650g	LAFE0A05226g	LADA0E08416g	LAFA0F19372g	LAMI0F12046g	SAKL0G11660g	KLTH0G07678g
L.A1	A1LA02-078970g	2	-	447	1398	LANO0H09142g	LAME0D07360g	ZYRO0A10736g	LAWA0G00650g	LACI0F11628g	LAFE0A05248g	LADA0E08438g	LAFA0F19394g	LAMI0F12068g	SAKL0G11682g	KLTH0G07700g
L.A1	A1LA02-078992g	2	+	448	1399	LANO0H09120g	LAME0D07338g	ZYRO0A10758g	LAWA0G00672g	LACI0F11606g	LAFE0A05270g	LADA0E08460g	LAFA0F19416g	LAMI0F12090g	SAKL0G11704g	KLTH0G07711g
L.A1	A1LA02-079014g	2	-	449	1400	LANO0H09098g	LAME0D07316g	ZYRO0A10780g	LAWA0G00694g	LACI0F11584g	LAFE0A05292g	LADA0E08482g	LAFA0F19438g	LAMI0F12112g	SAKL0G11726g	KLTH0G07744g
L.A1	A1LA02-079036g	2	-	450	1401	LANO0H09076g	LAME0D07294g	ZYRO0A10802g	LAWA0G00716g	LACI0F11562g	LAFE0A05314g	LADA0E08504g	LAFA0F19460g	LAMI0F12134g	SAKL0G11748g	KLTH0G07766g
L.A1	A1LA02-079058g	2	+	451	1402	LANO0H09054g	LAME0D07272g	ZYRO0A10824g	LAWA0G00738g	LACI0F11540g	LAFE0A05336g	LADA0E08526g	LAFA0F19482g	LAMI0F12156g	SAKL0G11770g	KLTH0G07788g
L.A1	A1LA02-079080g	2	-	452	1403	LANO0H09032g	LAME0D07250g	ZYRO0A10846g	LAWA0G00760g	LACI0F11518g	LAFE0A05358g	LADA0E08548g	LAFA0F19504g	LAMI0F12178g	SAKL0G11792g	KLTH0G07810g
L.A1	A1LA02-079102g	2	+	453	1404	LANO0H09010g	LAME0D07228g	ZYRO0A10890g	LAWA0G00782g	LACI0F11496g	LAFE0A05380g	LADA0E08570g	LAFA0F19526g	LAMI0F12200g	SAKL0G11814g	KLTH0G07832g
L.A1	A1LA02-079124g	2	-	454	1405	LANO0H08988g	LAME0D07206g	ZYRO0A10912g	LAWA0G00804g	LACI0F11474g	LAFE0A05402g	LADA0E08592g	LAFA0F19548g	LAMI0F12222g	SAKL0G11836g	KLTH0G07854g
L.A1	A1LA02-079168g	2	-	455	1406	LANO0H08966g	LAME0D07184g	ZYRO0A10934g	LAWA0G00826g	LACI0A03686g	LAFE0A05468g	LADA0E08614g	LAFA0F19570g	LAMI0F08856g	SAKL0G11880g	KLTH0G07876g
L.A1	A1LA02-079190g	2	+	456	1407	LANO0H08944g	LAME0D07162g	ZYRO0A10956g	LAWA0G00848g	LACI0A03664g	LAFE0A05490g	LADA0E08636g	LAFA0F19592g	LAMI0F08878g	SAKL0G11902g	KLTH0G07898g
L.A1	A1LA02-079212g	2	-	457	1408	LANO0E15104g	LAME0C02278g	ZYRO0A11000g	LAWA0C11980g	LACI0A03642g	LAFE0A05512g	LADA0D10880g	LAFA0B01970g	LAMI0H09560g	SAKL0G11968g	KLTH0B02574g
L.A1	A1LA02-079234g	2	+	458	1409	LANO0E15082g	LAME0C02300g	ZYRO0A11022g		LACI0A03620g	LAFE0A05534g	LADA0D10858g	LAFA0B01992g	LAMI0H09538g	SAKL0G11990g	KLTH0B02596g
L.A1	A1LA02-079256g	2	+	459	1410			ZYRO0A11044g							SAKL0G12012g
L.A1	A1LA02-079278g	2	-	460	1411	LANO0E15060g	LAME0C02322g	ZYRO0A11066g	LAWA0C11936g	LACI0A03576g	LAFE0A05556g	LADA0D10836g	LAFA0B02014g	LAMI0H09516g	SAKL0G12034g	KLTH0B02618g
L.A1	A1LA02-079300g	2	+	461	1412	LANO0E15038g	LAME0C02366g	ZYRO0A11088g	LAWA0C11914g	LACI0A03554g	LAFE0A05578g	LADA0D10814g	LAFA0B02036g	LAMI0H09494g	SAKL0G12056g	KLTH0B02640g
L.A1	A1LA02-079322g	2	-	462	1413	LANO0E15016g	LAME0C02388g	ZYRO0A11110g	LAWA0C11892g	LACI0A03532g	LAFE0A05600g	LADA0D10792g	LAFA0B02058g	LAMI0H09472g	SAKL0G12078g	KLTH0B02662g
L.A1	A1LA02-079344g	2	+	463	1414	LANO0E14994g	LAME0C02410g	ZYRO0A11154g	LAWA0C11870g	LACI0A03510g	LAFE0A05622g	LADA0D10770g	LAFA0B02080g	LAMI0H09450g	SAKL0G12100g	KLTH0B02684g
L.A1	A1LA02-079366g	2	+	464	1415	LANO0E14972g	LAME0C02432g	ZYRO0A11440g	LAWA0C11848g	LACI0A03488g	LAFE0A05644g	LADA0D10748g	LAFA0B02102g	LAMI0H09428g	SAKL0G12122g	KLTH0B02706g
L.A1	A1LA02-079388g	2	-	465	1416	LANO0E14950g	LAME0C02454g	ZYRO0A11418g	LAWA0C11826g	LACI0A03466g	LAFE0A05666g	LADA0D10726g	LAFA0B02124g	LAMI0H09406g	SAKL0G12144g	KLTH0B02728g
L.A1	A1LA02-079410g	2	-	466	1417	LANO0E14928g	LAME0C02476g	ZYRO0A11396g	LAWA0C11804g	LACI0A03444g	LAFE0A05688g	LADA0D10704g	LAFA0B02146g	LAMI0H09384g	SAKL0G12166g	KLTH0B02750g
L.A1	A1LA02-079454g	2	+	467	1418	LANO0E14884g	LAME0C02520g	ZYRO0A11176g	LAWA0C11716g	LACI0A03400g	LAFE0A05732g	LADA0D10682g	LAFA0B02190g	LAMI0H09362g	SAKL0G12210g	KLTH0B02794g
L.A1	A1LA02-079542g	2	+	468	1419	LANO0E14818g	LAME0C02586g	ZYRO0B09944g	LAWA0C11606g	LACI0A03334g	LAFE0A05820g	LADA0D10616g	LAFA0B02256g	LAMI0H09296g	SAKL0G12342g	KLTH0B02882g
L.A1	A1LA02-079586g	2	-	469	1420	LANO0E14796g	LAME0C02608g	ZYRO0B09966g	LAWA0C11584g	LACI0A03290g	LAFE0A05864g	LADA0D10594g	LAFA0B02278g		SAKL0G12386g	KLTH0B02904g
L.A1	A1LA02-079608g	2	+	470	1421	LANO0E14774g	LAME0C02630g	ZYRO0B09988g	LAWA0C11562g	LACI0A03268g	LAFE0A05886g	LADA0D10572g	LAFA0B02300g	LAMI0H09252g	SAKL0G12408g	KLTH0B02926g
L.A1	A1LA02-079630g	2	-	471	1422	LANO0E14752g	LAME0C02652g	ZYRO0B10010g	LAWA0C11540g	LACI0A03246g	LAFE0A05908g	LADA0D10550g	LAFA0B02322g	LAMI0H09230g	SAKL0G12430g	KLTH0B02948g
L.A1	A1LA02-079652g	2	-	472	1423	LANO0E14730g	LAME0C02674g	ZYRO0B10032g	LAWA0C11518g	LACI0A03224g	LAFE0A05930g	LADA0D10528g	LAFA0B02344g	LAMI0H09208g	SAKL0G12452g	KLTH0B02970g
L.A1	A1LA02-079696g	2	+	473	1424	LANO0E14708g	LAME0C02718g	ZYRO0B10054g	LAWA0C11474g	LACI0A03180g	LAFE0A05974g	LADA0D10506g	LAFA0B02388g	LAMI0H09186g	SAKL0G12496g	KLTH0B03014g
L.A1	A1LA02-079718g	2	-	474	1425	LANO0E14664g	LAME0C02762g	ZYRO0B10098g	LAWA0C11430g	LACI0A03136g	LAFE0A06018g	LADA0D10462g	LAFA0B02432g	LAMI0H09142g	SAKL0G12540g	KLTH0B03058g
L.A1	A1LA02-079740g	2	-	475	1426	LANO0E14642g	LAME0C02784g	ZYRO0B10120g	LAWA0C11408g	LACI0A03114g	LAFE0A06040g	LADA0D10440g	LAFA0B02454g	LAMI0H09120g	SAKL0G12562g	KLTH0B03080g
L.A1	A1LA02-079762g	2	-	476	1427	LANO0E14620g	LAME0C02806g	ZYRO0B10142g	LAWA0C11386g	LACI0A03092g	LAFE0A06062g	LADA0D10418g	LAFA0B02476g	LAMI0H09098g	SAKL0G12584g	KLTH0B03102g
L.A1	A1LA02-079784g	2	-	477	1428	LANO0E14598g	LAME0C02828g	ZYRO0B10164g	LAWA0C11364g	LACI0A03070g	LAFE0A06084g	LADA0D10396g	LAFA0B02498g	LAMI0H09076g	SAKL0G12606g	KLTH0B03124g
L.A1	A1LA02-079806g	2	+	478	1429	LANO0E14576g	LAME0C02850g	ZYRO0B10186g	LAWA0C11342g	LACI0A03048g	LAFE0A06106g	LADA0D10374g	LAFA0B02520g	LAMI0H09054g	SAKL0G12628g	KLTH0B03146g
L.A1	A1LA02-079828g	2	-	479	1430	LANO0E14554g	LAME0C02872g	ZYRO0B10208g	LAWA0C11320g	LACI0A03026g	LAFE0A06128g	LADA0D10352g	LAFA0B02542g	LAMI0H09032g	SAKL0G12650g	KLTH0B03168g
L.A1	A1LA02-079850g	2	-	480	1431	LANO0E14532g	LAME0C02894g	ZYRO0B10230g	LAWA0C11298g	LACI0A03004g	LAFE0A06150g	LADA0D10330g	LAFA0B02564g	LAMI0H09010g	SAKL0G12672g	KLTH0B03190g
L.A1	A1LA02-079872g	2	+	481	1432			ZYRO0B10252g	LAWA0C11276g	LACI0A02982g	LAFE0A06172g			LAMI0H08988g	SAKL0G12694g	KLTH0B03212g
L.A1	A1LA02-079894g	2	-	482	1433	LANO0E14510g	LAME0C02916g	ZYRO0B10274g	LAWA0C11254g	LACI0A02960g	LAFE0A06194g	LADA0D10308g	LAFA0B02586g	LAMI0H08966g	SAKL0G12716g	KLTH0B03234g
L.A1	A1LA02-079916g	2	+	483	1434	LANO0E14488g	LAME0C02938g	ZYRO0B10296g	LAWA0C11232g	LACI0A02938g	LAFE0A06216g	LADA0D10286g	LAFA0B02608g	LAMI0H08944g	SAKL0G12738g	KLTH0B03256g
L.A1	A1LA02-079938g	2	-	484	1435	LANO0E14466g	LAME0C02960g	ZYRO0B10318g	LAWA0C11210g	LACI0A02916g	LAFE0A06238g	LADA0D10264g	LAFA0B02630g	LAMI0H08922g	SAKL0G12760g	KLTH0B03278g
L.A1	A1LA02-079960g	2	+	485	1436	LANO0E14444g	LAME0C02982g	ZYRO0B10340g	LAWA0C11188g	LACI0A02894g	LAFE0A06260g	LADA0D10242g	LAFA0B02652g	LAMI0H08900g	SAKL0G12782g	KLTH0B03300g
L.A1	A1LA02-079982g	2	-	486	1437	LANO0E14422g	LAME0C03004g	ZYRO0B10362g	LAWA0C11166g	LACI0A02872g	LAFE0A06282g	LADA0D10220g	LAFA0B02674g	LAMI0H08878g	SAKL0G12804g	KLTH0B03322g
L.A1	A1LA02-080026g	2	+	487	1438	LANO0E14246g	LAME0C03048g	ZYRO0B10384g	LAWA0C11122g	LACI0A02828g	LAFE0A06326g	LADA0D10044g	LAFA0B02718g	LAMI0H08834g	SAKL0G12826g	KLTH0B03344g
L.A1	A1LA02-080048g	2	-	488	1439	LANO0E14268g	LAME0C03070g	ZYRO0B10406g	LAWA0C11100g	LACI0A02806g	LAFE0A06348g	LADA0D10066g	LAFA0B02740g	LAMI0H08812g	SAKL0G12848g	KLTH0B03366g
L.A1	A1LA02-080070g	2	+	489	1440	LANO0E14290g	LAME0C03092g	ZYRO0B10428g	LAWA0C11078g	LACI0A02784g	LAFE0A06370g	LADA0D10088g	LAFA0B02762g	LAMI0H08790g	SAKL0G12870g	KLTH0B03388g
L.A1	A1LA02-080092g	2	-	490	1441	LANO0E14312g	LAME0C03114g	ZYRO0B10450g	LAWA0C11056g	LACI0A02762g	LAFE0A06392g	LADA0D10110g	LAFA0B02784g	LAMI0H08768g	SAKL0G12892g	KLTH0B03410g
L.A1	A1LA02-080114g	2	-	491	1442	LANO0E14334g	LAME0C03136g	ZYRO0B10472g	LAWA0C11034g	LACI0A02740g	LAFE0A06414g	LADA0D10132g	LAFA0B02806g	LAMI0H08746g	SAKL0G12914g	KLTH0B03432g
L.A1	A1LA02-080136g	2	+	492	1443	LANO0E14356g	LAME0C03158g	ZYRO0B10494g	LAWA0C11012g	LACI0A02718g	LAFE0A06436g	LADA0D10154g	LAFA0B02828g	LAMI0H08724g	SAKL0G12936g	KLTH0B03454g
L.A1	A1LA02-080158g	2	-	493	1444	LANO0E14378g	LAME0C03180g	ZYRO0B10516g	LAWA0C10990g	LACI0A02696g	LAFE0A06458g	LADA0D10176g	LAFA0B02850g	LAMI0H08702g	SAKL0G12958g	KLTH0B03476g
L.A1	A1LA02-080180g	2	-	494	1445	LANO0E14400g	LAME0C03202g	ZYRO0B10538g	LAWA0C10968g	LACI0A02674g	LAFE0A06480g	LADA0D10198g	LAFA0B02872g	LAMI0H08680g	SAKL0G12980g	KLTH0B03498g
L.A1	A1LA02-080202g	2	+	495	1446	LANO0E14202g	LAME0C03224g	ZYRO0B10560g	LAWA0C10946g	LACI0A02652g	LAFE0A06502g	LADA0D10000g	LAFA0B02894g	LAMI0H08658g	SAKL0G13002g	KLTH0B03520g
L.A1	A1LA02-080224g	2	-	496	1447	LANO0E14180g	LAME0C03246g	ZYRO0B10582g	LAWA0C10924g	LACI0A02630g	LAFE0A06524g	LADA0D09978g	LAFA0B02916g	LAMI0H08614g	SAKL0G13024g	KLTH0B03542g
L.A1	A1LA02-080246g	2	+	497	1448	LANO0E14158g	LAME0C03268g	ZYRO0B10604g	LAWA0C10902g	LACI0A02608g	LAFE0A06546g	LADA0D09956g	LAFA0B02938g	LAMI0H08592g	SAKL0G13046g	KLTH0B03564g
L.A1	A1LA02-080268g	2	-	498	1449	LANO0E14136g	LAME0C03290g	ZYRO0B10626g	LAWA0C10880g	LACI0A02586g	LAFE0A06568g	LADA0D09934g	LAFA0B02960g	LAMI0H08570g	SAKL0G13068g	KLTH0B03586g
L.A1	A1LA02-080290g	2	+	499	1450	LANO0E14114g	LAME0C03312g	ZYRO0B10648g		LACI0A02564g	LAFE0A06590g	LADA0D09912g	LAFA0B02982g	LAMI0H08548g	SAKL0G13090g	KLTH0B03608g
L.A1	A1LA02-080312g	2	-	500	1451	LANO0E14092g	LAME0C03334g	ZYRO0B10670g	LAWA0C10814g	LACI0A02542g	LAFE0A06612g	LADA0D09890g	LAFA0B03004g	LAMI0H08460g	SAKL0G13112g	KLTH0B03630g
L.A1	A1LA02-080334g	2	+	501	1452	LANO0E14026g	LAME0C03356g	ZYRO0B10736g	LAWA0C10792g	LACI0A02520g	LAFE0A06634g	LADA0D09868g	LAFA0B03026g	LAMI0H08460g	SAKL0G13134g	KLTH0B03652g
L.A1	A1LA02-080356g	2	+	502	1453	LANO0E14048g	LAME0C03378g	ZYRO0B10714g	LAWA0C10770g	LACI0A02498g	LAFE0A06656g	LADA0D09846g	LAFA0B03048g	LAMI0H08482g	SAKL0G13156g	KLTH0B03674g
L.A1	A1LA02-080378g	2	-	503	1454	LANO0E14026g	LAME0C03400g	ZYRO0B10736g	LAWA0C10748g	LACI0A02476g	LAFE0A06678g	LADA0D09824g	LAFA0B03070g	LAMI0H08460g	SAKL0G13178g	KLTH0B03696g
L.A1	A1LA02-080400g	2	+	504	1455	LANO0E14004g	LAME0C03422g	ZYRO0B10868g	LAWA0C10704g	LACI0A02454g	LAFE0A06700g	LADA0D09802g	LAFA0B03092g	LAMI0H08438g	SAKL0G13222g	KLTH0B03740g
L.A1	A1LA02-080422g	2	-	505	1456	LANO0E13982g	LAME0C03444g	ZYRO0B10890g	LAWA0C10682g	LACI0A02432g	LAFE0A06722g	LADA0D09780g	LAFA0B03114g	LAMI0H08416g	SAKL0G13244g	KLTH0B03762g
L.A1	A1LA02-080444g	2	-	506	1457	LANO0E13960g	LAME0C03466g	ZYRO0B10912g	LAWA0C10660g	LACI0A02410g	LAFE0A06744g	LADA0D09758g	LAFA0B03136g	LAMI0H08394g	SAKL0G13266g	KLTH0B03784g
L.A1	A1LA02-080488g	2	-	507	1458	LANO0E13916g	LAME0C03532g	ZYRO0B10934g	LAWA0C10616g	LACI0A02366g	LAFE0A06788g	LADA0D09736g	LAFA0B03202g	LAMI0H08350g	SAKL0G13310g	KLTH0B03828g
L.A1	A1LA02-080510g	2	-	508	1459	LANO0E13894g	LAME0C03554g	ZYRO0B10956g	LAWA0C10594g	LACI0A02344g	LAFE0A06810g	LADA0D09714g	LAFA0B03224g	LAMI0H08328g	SAKL0G13332g	KLTH0B03850g
L.A1	A1LA02-080532g	2	-	509	1460	LANO0E13872g	LAME0C03576g	ZYRO0B10978g	LAWA0C10572g	LACI0A02322g	LAFE0A06832g	LADA0D09692g	LAFA0B03246g	LAMI0H08306g	SAKL0G13354g	KLTH0B03872g
L.A1	A1LA02-080642g	2	+	510	1461	LANO0E15148g	LAME0C02234g	ZYRO0F01694g	LAWA0C12046g	LACI0F18624g	LAFE0E13366g	LADA0D10924g	LAFA0B01904g	LAMI0F09318g	SAKL0G13552g	KLTH0B02508g
L.A1	A1LA02-080664g	2	+	511	1462	LANO0E15170g	LAME0C02190g	ZYRO0F01716g	LAWA0C12068g	LACI0F18646g	LAFE0E13388g	LADA0D10946g	LAFA0B01882g	LAMI0F09296g	SAKL0G13574g	KLTH0B02486g
L.A1	A1LA02-080686g	2	-	512	1463	LANO0E15192g	LAME0C02168g	ZYRO0F01738g	LAWA0C12090g	LACI0F18668g	LAFE0E13410g	LADA0D10968g	LAFA0B01860g	LAMI0F09274g	SAKL0G13596g	KLTH0B02464g
L.A1	A1LA02-080708g	2	-	513	1464	LANO0E15214g	LAME0C02146g	ZYRO0F01760g	LAWA0C12112g	LACI0F18690g	LAFE0E13432g	LADA0D10990g	LAFA0B01838g	LAMI0F09252g	SAKL0G13618g	KLTH0B02442g
L.A1	A1LA02-080730g	2	+	514	1465	LANO0E15236g	LAME0C02124g	ZYRO0C13728g	LAWA0C12134g	LACI0F18712g	LAFE0E13454g	LADA0D11012g	LAFA0B01816g	LAMI0F09230g	SAKL0G13640g	KLTH0B02420g
L.A1	A1LA02-080752g	2	-	515	1466	LANO0E15258g	LAME0C02102g	ZYRO0C13706g	LAWA0C12156g	LACI0F18734g	LAFE0E13476g	LADA0D11034g	LAFA0B01794g	LAMI0F09208g	SAKL0G13662g	KLTH0B02398g
L.A1	A1LA02-080774g	2	-	516	1467	LANO0E15302g	LAME0C02058g	ZYRO0C13662g	LAWA0C12200g	LACI0F18778g	LAFE0E13520g	LADA0D11078g	LAFA0B01750g	LAMI0F09164g	SAKL0G13706g	KLTH0B02354g
L.A1	A1LA02-080796g	2	+	517	1468	LANO0E15324g	LAME0C02036g	ZYRO0C13640g	LAWA0C12222g	LACI0F18800g	LAFE0E13542g	LADA0D11100g	LAFA0B01728g	LAMI0F09142g	SAKL0G13728g	KLTH0B02332g
L.A1	A1LA02-080818g	2	-	518	1469	LANO0E15346g	LAME0C02014g	ZYRO0C13618g	LAWA0C12244g	LACI0F18822g	LAFE0E13564g	LADA0D11122g	LAFA0B01706g	LAMI0F09120g	SAKL0G13750g	KLTH0B02310g
L.A1	A1LA02-080840g	2	-	519	1470	LANO0E15368g	LAME0C01992g	ZYRO0C13596g	LAWA0C12266g	LACI0F18844g	LAFE0E13586g	LADA0D11144g	LAFA0B01684g	LAMI0F09098g	SAKL0G13772g	KLTH0B02288g
L.A1	A1LA02-080862g	2	-	520	1471	LANO0E15390g	LAME0C01970g	ZYRO0G12320g	LAWA0C12288g	LACI0F18866g	LAFE0E13608g	LADA0D11166g	LAFA0B01662g	LAMI0A07382g	SAKL0G13794g	KLTH0B02266g
L.A1	A1LA02-080884g	2	+	521	1472	LANO0E15412g	LAME0C01948g	ZYRO0G12298g	LAWA0C12310g	LACI0F18888g	LAFE0E13630g	LADA0D11188g	LAFA0B01640g	LAMI0A07404g	SAKL0G13816g	KLTH0B02244g
L.A1	A1LA02-080906g	2	+	522	1473	LANO0E15434g	LAME0C01926g	ZYRO0G12276g	LAWA0C12332g	LACI0F18910g	LAFE0E13652g	LADA0D11210g	LAFA0B01618g	LAMI0A07426g	SAKL0G13838g	KLTH0B02222g
L.A1	A1LA02-080928g	2	+	523	1474	LANO0E15456g	LAME0C01904g	ZYRO0G12254g	LAWA0C12354g	LACI0F18932g	LAFE0E13674g	LADA0D11232g	LAFA0B01596g	LAMI0A07448g	SAKL0G13860g	KLTH0B02200g
L.A1	A1LA02-080950g	2	-	524	1475	LANO0E15478g	LAME0C01882g	ZYRO0G12232g	LAWA0C12376g	LACI0F18954g	LAFE0E13696g	LADA0D11254g	LAFA0B01574g	LAMI0A07470g	SAKL0G13882g	KLTH0B02178g
L.A1	A1LA02-080972g	2	-	525	1476	LANO0E15500g	LAME0C01860g	ZYRO0G12210g	LAWA0C12398g	LACI0F18976g	LAFE0E13718g	LADA0F10286g	LAFA0B01552g	LAMI0A07492g	SAKL0G13904g	KLTH0B02156g
L.A1	A1LA02-080994g	2	-	526	1477	LANO0E15522g	LAME0C01838g	ZYRO0G12188g	LAWA0C12420g	LACI0F18998g	LAFE0E13740g	LADA0F10264g	LAFA0B01530g	LAMI0A07514g	SAKL0G13926g	KLTH0B02134g
L.A1	A1LA02-081016g	2	-	527	1478	LANO0E15544g	LAME0C01816g	ZYRO0G12144g	LAWA0C12464g	LACI0F19042g	LAFE0E13762g	LADA0F10242g	LAFA0B01508g	LAMI0A07536g	SAKL0G13970g	KLTH0B02090g
L.A1	A1LA02-081060g	2	+	528	1479	LANO0E15566g	LAME0C01794g	ZYRO0G12078g	LAWA0C12530g	LACI0A02212g	LAFE0A07030g	LADA0F10198g	LAFA0B01486g		SAKL0G14036g	KLTH0B02024g
L.A1	A1LA02-081082g	2	+	529	1480	LANO0E15588g	LAME0C01772g	ZYRO0G12056g	LAWA0C12552g	LACI0A02190g	LAFE0A07052g	LADA0F10176g	LAFA0B01464g	LAMI0A07580g	SAKL0G14058g	KLTH0B02002g
L.A1	A1LA02-081104g	2	+	530	1481	LANO0E15610g	LAME0C01750g	ZYRO0G12034g	LAWA0C12574g	LACI0A02168g	LAFE0A07074g	LADA0F10154g	LAFA0B01442g	LAMI0A07602g	SAKL0G14080g	KLTH0B01980g
L.A1	A1LA02-081126g	2	-	531	1482	LANO0E15632g		ZYRO0G12012g	LAWA0C12596g	LACI0A02146g	LAFE0A07096g	LADA0F10132g		LAMI0A07624g	SAKL0G14102g	KLTH0B01958g
L.A1	A1LA02-081148g	2	+	532	1483	LANO0E15676g	LAME0C01728g	ZYRO0G11990g	LAWA0C12618g	LACI0A02124g	LAFE0A07118g	LADA0F10110g	LAFA0B01420g	LAMI0A07668g	SAKL0G14124g	KLTH0B01914g
L.A1	A1LA02-081170g	2	-	533	1484	LANO0E15698g	LAME0C01002g	ZYRO0G11968g	LAWA0C12640g	LACI0A02102g	LAFE0A07140g	LADA0F10088g	LAFA0B00716g	LAMI0A07690g	SAKL0G14146g	KLTH0B01892g
L.A1	A1LA02-081192g	2	-	534	1485	LANO0E15764g	LAME0C01024g	ZYRO0G11946g	LAWA0C12662g	LACI0A02080g	LAFE0A07162g	LADA0F10066g	LAFA0B00738g	LAMI0A07712g	SAKL0G14168g	KLTH0B01870g
L.A1	A1LA02-081214g	2	-	535	1486	LANO0E15742g	LAME0C01046g	ZYRO0G11924g	LAWA0C12684g	LACI0A02058g	LAFE0A07184g	LADA0F10044g	LAFA0B00760g	LAMI0A07734g	SAKL0G14190g	KLTH0B01826g
L.A1	A1LA02-081236g	2	-	536	1487	LANO0E15764g		ZYRO0G11902g	LAWA0C12706g	LACI0A02036g	LAFE0A07206g			LAMI0A07756g	SAKL0G14212g
L.A1	A1LA02-081258g	2	+	537	1488	LANO0E15786g	LAME0C01090g	ZYRO0G11880g	LAWA0C12728g	LACI0A02014g	LAFE0A07228g	LADA0F10000g	LAFA0B00804g	LAMI0A07778g	SAKL0G14234g	KLTH0B01804g
L.A1	A1LA02-081280g	2	-	538	1489	LANO0E15808g	LAME0C01112g	ZYRO0G11858g	LAWA0C12750g	LACI0A01992g	LAFE0A07250g	LADA0F09978g	LAFA0B00826g	LAMI0A07800g	SAKL0G14267g	KLTH0B01782g
L.A1	A1LA02-081302g	2	+	539	1490	LANO0E15830g	LAME0C01134g	ZYRO0G11836g	LAWA0C12772g	LACI0A01970g	LAFE0A07272g	LADA0F09956g	LAFA0B00848g	LAMI0A07822g	SAKL0G14278g	KLTH0B01760g
L.A1	A1LA02-081324g	2	+	540	1491	LANO0E15852g	LAME0C01156g	ZYRO0G11814g	LAWA0C12794g	LACI0A01948g	LAFE0A07294g	LADA0F09934g	LAFA0B00870g	LAMI0A07844g	SAKL0G14300g	KLTH0B01738g
L.A1	A1LA02-081346g	2	-	541	1492	LANO0E15874g	LAME0C01178g	ZYRO0G11792g	LAWA0C12816g	LACI0A01926g	LAFE0A07316g	LADA0F09912g	LAFA0B00892g	LAMI0A07866g	SAKL0G14322g	KLTH0B01716g
L.A1	A1LA02-081368g	2	+	542	1493	LANO0E15896g	LAME0C01200g	ZYRO0G11770g	LAWA0C12838g	LACI0A01904g	LAFE0A07338g	LADA0F09890g	LAFA0B00914g	LAMI0A07888g	SAKL0G14344g	KLTH0B01694g
L.A1	A1LA02-081390g	2	+	543	1494	LANO0E15918g	LAME0C01222g	ZYRO0G11748g	LAWA0C12860g	LACI0A01882g	LAFE0A07360g	LADA0F09868g	LAFA0B00936g	LAMI0A07910g	SAKL0G14366g	KLTH0B01518g
L.A1	A1LA02-081412g	2	+	544	1495	LANO0E15940g	LAME0C01244g	ZYRO0G11682g	LAWA0C12882g	LACI0A01860g	LAFE0A07382g	LADA0F09846g	LAFA0B00958g	LAMI0A07932g	SAKL0G14410g	KLTH0B01650g
L.A1	A1LA02-081434g	2	-	545	1496	LANO0E15962g	LAME0C01266g	ZYRO0G11660g	LAWA0C12904g	LACI0A01838g	LAFE0A07404g	LADA0F09824g	LAFA0B00980g	LAMI0A07954g	SAKL0G14432g	KLTH0B01628g
L.A1	A1LA02-081456g	2	-	546	1497	LANO0E15984g	LAME0C01288g	ZYRO0G11638g	LAWA0C12926g	LACI0A01816g	LAFE0A07426g	LADA0F09802g	LAFA0B01002g	LAMI0A07976g	SAKL0G14454g	KLTH0B01606g
L.A1	A1LA02-081478g	2	-	547	1498	LANO0E16006g	LAME0C01310g	ZYRO0G11616g	LAWA0C12948g	LACI0A01794g	LAFE0A07448g	LADA0F09780g	LAFA0B01024g	LAMI0A07998g	SAKL0G14476g	KLTH0B01584g
L.A1	A1LA02-081500g	2	+	548	1499	LANO0E16028g	LAME0C01332g	ZYRO0G11594g	LAWA0C12970g	LACI0A01772g	LAFE0A07470g	LADA0F09758g	LAFA0B01046g	LAMI0A08020g	SAKL0G14498g	KLTH0B01562g
L.A1	A1LA02-081522g	2	-	549	1500	LANO0E16050g	LAME0C01354g	ZYRO0G11572g	LAWA0C12992g	LACI0A01750g	LAFE0A07492g	LADA0F09736g	LAFA0B01068g	LAMI0A08042g	SAKL0G14520g	KLTH0B01540g
L.A1	A1LA02-081544g	2	+	550	1501	LANO0E16072g	LAME0C01376g	ZYRO0G11550g	LAWA0C13014g	LACI0A01728g	LAFE0A07514g	LADA0F09714g	LAFA0B01090g	LAMI0A08086g	SAKL0G14542g	KLTH0B01496g
L.A1	A1LA02-081566g	2	-	551	1502	LANO0E16094g	LAME0C01398g	ZYRO0G11528g	LAWA0C13036g	LACI0A01706g	LAFE0A07536g	LADA0F09692g	LAFA0B01112g		SAKL0G14564g	KLTH0B01474g
L.A1	A1LA02-081588g	2	+	552	1503	LANO0E16116g	LAME0C01420g	ZYRO0G11506g	LAWA0C13058g	LACI0A01684g	LAFE0A07558g	LADA0F09670g	LAFA0B01134g	LAMI0A08152g	SAKL0G14586g	KLTH0B01452g
L.A1	A1LA02-081632g	2	+	553	1504	LANO0E16138g	LAME0C01464g	ZYRO0G11462g	LAWA0C13080g	LACI0A01640g	LAFE0A07602g	LADA0F09626g	LAFA0B01222g	LAMI0A08174g	SAKL0G14630g	KLTH0B01408g
L.A1	A1LA02-081654g	2	-	554	1505	LANO0E16160g	LAME0C01486g	ZYRO0G11440g	LAWA0C13102g	LACI0A01618g	LAFE0A07624g	LADA0F09604g	LAFA0B01244g	LAMI0A08196g	SAKL0G14652g	KLTH0B01386g
L.A1	A1LA02-081676g	2	-	555	1506	LANO0E16182g	LAME0C01508g	ZYRO0G11418g	LAWA0C13124g	LACI0A01596g	LAFE0A07646g	LADA0F09582g	LAFA0B01266g	LAMI0A08218g	SAKL0G14674g	KLTH0B01364g
L.A1	A1LA02-081698g	2	+	556	1507	LANO0E16204g	LAME0C01596g	ZYRO0G11396g	LAWA0C13146g	LACI0A01574g	LAFE0A07668g	LADA0F09560g	LAFA0B01288g	LAMI0A08240g	SAKL0G14696g	KLTH0B01342g
L.A1	A1LA02-081720g	2	-	557	1508	LANO0E16226g	LAME0C01618g	ZYRO0G11374g	LAWA0C13168g	LACI0A01552g	LAFE0A07690g	LADA0F09538g	LAFA0B01310g	LAMI0A08262g	SAKL0G14718g	KLTH0B01320g
L.A1	A1LA02-081742g	2	+	558	1509	LANO0E16248g	LAME0C01640g	ZYRO0F01672g	LAWA0C13190g	LACI0A01530g	LAFE0A07712g	LADA0F09516g	LAFA0B01332g	LAMI0A08284g	SAKL0G14740g	KLTH0B01298g
L.A1	A1LA02-081764g	2	-	559	1510	LANO0E16270g	LAME0C01662g	ZYRO0F01650g	LAWA0C13212g	LACI0A01508g	LAFE0A07734g	LADA0F09494g	LAFA0B01354g	LAMI0A08306g	SAKL0G14784g	KLTH0B01276g
L.A1	A1LA02-081786g	2	+	560	1511	LANO0E16292g	LAME0C01684g	ZYRO0F01628g	LAWA0C13256g	LACI0A01332g	LAFE0A07778g	LADA0G00672g	LAFA0B01376g	LAMI0A08350g	SAKL0G14850g	KLTH0B01232g
L.A1	A1LA02-081830g	2	+	561	1512	LANO0E16358g	LAME0C00980g	ZYRO0F01606g	LAWA0C13300g	LACI0A01288g	LAFE0A07822g	LADA0G00628g	LAFA0B00672g	LAMI0A08394g	SAKL0G14894g	KLTH0B01188g
L.A1	A1LA02-081896g	2	-	562	1513	LANO0E16402g	LAME0C00892g	ZYRO0F01584g	LAWA0C13344g	LACI0A01156g	LAFE0A07910g	LADA0G00584g	LAFA0B00606g	LAMI0A08438g	SAKL0G14960g	KLTH0B01144g
L.A1	A1LA02-081918g	2	+	563	1514	LANO0F15808g	LAME0D03796g	ZYRO0F01562g	LAWA0F01310g	LACI0D07954g	LAFE0C12134g	LADA0H18888g	LAFA0E03004g	LAMI0G02828g	SAKL0G14982g	KLTH0C02200g
L.A1	A1LA02-081940g	2	+	564	1515	LANO0F15830g	LAME0D04016g	ZYRO0F01540g	LAWA0F01288g	LACI0D07976g	LAFE0C12156g	LADA0H18910g	LAFA0E02982g	LAMI0G02806g	SAKL0G15004g	KLTH0C02178g
L.A1	A1LA02-081962g	2	-	565	1516	LANO0F15874g	LAME0D03972g	ZYRO0F01518g	LAWA0F01266g	LACI0D07998g	LAFE0C12178g	LADA0H18954g	LAFA0E02938g	LAMI0G02762g	SAKL0G15026g	KLTH0C02134g
L.A1	A1LA02-081984g	2	+	566	1517	LANO0F15896g	LAME0D03950g	ZYRO0F01496g	LAWA0F01244g	LACI0D08020g	LAFE0C12200g	LADA0H18976g	LAFA0E02916g	LAMI0G02740g	SAKL0G15048g	KLTH0C02112g
L.A1	A1LA02-082006g	2	+	567	1518	LANO0F15918g	LAME0D03928g	ZYRO0A10230g	LAWA0F01222g	LACI0D08042g	LAFE0C12222g	LADA0H18998g	LAFA0E02894g	LAMI0G02718g	SAKL0G15070g	KLTH0C02090g
L.A1	A1LA02-082028g	2	-	568	1519	LANO0F15940g	LAME0D03906g	ZYRO0A10252g	LAWA0F01200g	LACI0D08064g	LAFE0C12244g	LADA0H19020g	LAFA0E02872g	LAMI0G02696g	SAKL0G15092g	KLTH0C02068g
L.A1	A1LA02-082050g	2	+	569	1520	LANO0F15962g	LAME0E01750g	ZYRO0A10274g	LAWA0F01178g	LACI0D08086g	LAFE0C12266g	LADA0H19042g	LAFA0E02850g	LAMI0G02674g	SAKL0G15114g	KLTH0C02046g
L.A1	A1LA02-082094g	2	+	570	1521	LANO0F15984g	LAME0E01728g	ZYRO0B15466g	LAWA0F01156g	LACI0D08130g	LAFE0C12310g	LADA0H19064g	LAFA0E02828g	LAMI0G02630g	SAKL0G15180g	KLTH0C02024g
L.A1	A1LA02-082116g	2	-	571	1522	LANO0F16006g	LAME0E01706g	ZYRO0B15444g	LAWA0F01134g	LACI0D08152g	LAFE0C12332g	LADA0H19086g	LAFA0E02806g	LAMI0G02608g	SAKL0G15202g	KLTH0C02002g
L.A1	A1LA02-082138g	2	-	572	1523	LANO0F16028g	LAME0E01684g	ZYRO0B15422g	LAWA0F01112g	LACI0D08174g	LAFE0C12354g	LADA0H19108g	LAFA0E02784g	LAMI0G02586g	SAKL0G15246g	KLTH0C01980g
L.A1	A1LA02-082160g	2	+	573	1524	LANO0F16050g	LAME0E01662g	ZYRO0B15400g	LAWA0F01090g	LACI0C01530g	LAFE0C12398g	LADA0H19130g	LAFA0E02762g	LAMI0G02564g	SAKL0G15268g	KLTH0C01958g
L.A1	A1LA02-082182g	2	-	574	1525	LANO0F16072g	LAME0E01640g	ZYRO0B15378g	LAWA0F01068g	LACI0C01508g	LAFE0C12420g	LADA0H19152g	LAFA0E02740g	LAMI0G02542g	SAKL0G15290g	KLTH0C01936g
L.A1	A1LA02-082204g	2	+	575	1526	LANO0F16116g	LAME0E01596g	ZYRO0B15312g	LAWA0F01002g	LACI0C01464g	LAFE0C12464g	LADA0H19196g	LAFA0E02696g	LAMI0G02498g	SAKL0G15334g	KLTH0C01892g
L.A1	A1LA02-082226g	2	-	576	1527	LANO0F16138g	LAME0E01574g	ZYRO0B15290g	LAWA0F00980g	LACI0C01442g	LAFE0C12486g	LADA0H19218g	LAFA0E02674g	LAMI0G02476g	SAKL0G15356g	KLTH0C01870g
L.A1	A1LA02-082248g	2	+	577	1528	LANO0F16160g	LAME0E01464g	ZYRO0B15268g	LAWA0F15104g	LACI0C01420g	LAFE0C12508g	LADA0H19240g	LAFA0E02564g	LAMI0G02432g	SAKL0G15378g	KLTH0C01848g
L.A1	A1LA02-082270g	2	+	578	1529	LANO0F16182g	LAME0E01442g	ZYRO0B15246g	LAWA0F15126g	LACI0C01398g	LAFE0C12530g	LADA0H19262g	LAFA0E02586g	LAMI0G02410g	SAKL0G15400g	KLTH0C01826g
L.A1	A1LA02-082292g	2	-	579	1530	LANO0F16204g	LAME0E01420g	ZYRO0B15224g	LAWA0F15148g	LACI0C01376g	LAFE0C12552g	LADA0H19284g	LAFA0E02608g	LAMI0G02388g	SAKL0G15422g	KLTH0C01804g
L.A1	A1LA02-082314g	2	+	580	1531	LANO0F16226g	LAME0E01398g	ZYRO0B15202g	LAWA0F15170g	LACI0C01354g	LAFE0C12574g	LADA0H19306g	LAFA0E02630g	LAMI0G02366g	SAKL0G15444g	KLTH0C01782g
L.A1	A1LA02-082336g	2	-	581	1532	LANO0F16248g	LAME0E01376g	ZYRO0B15180g	LAWA0F15192g	LACI0C01332g	LAFE0C12596g	LADA0H19328g	LAFA0E02652g	LAMI0G02344g	SAKL0G15466g	KLTH0C01760g
L.A1	A1LA02-082358g	2	+	582	1533	LANO0F16270g	LAME0E01486g	ZYRO0B15158g	LAWA0F15214g	LACI0C01310g	LAFE0C12618g	LADA0H19350g	LAFA0E02542g	LAMI0G02322g	SAKL0G15488g	KLTH0C01694g
L.A1	A1LA02-082380g	2	-	583	1534	LANO0F16292g	LAME0E01508g	ZYRO0B15136g	LAWA0F15236g	LACI0C01288g	LAFE0C12640g	LADA0H19372g	LAFA0E02520g	LAMI0G02300g	SAKL0G15510g	KLTH0C01672g
L.A1	A1LA02-082402g	2	+	584	1535	LANO0F16314g	LAME0E01530g	ZYRO0B15114g	LAWA0F15258g	LACI0C01266g	LAFE0C12662g	LADA0H19394g	LAFA0E02498g	LAMI0G02278g	SAKL0G15532g	KLTH0C01650g
L.A1	A1LA02-082424g	2	-	585	1536	LANO0F16336g	LAME0E01552g	ZYRO0B15092g	LAWA0F15280g	LACI0C01244g	LAFE0C12684g	LADA0H19416g	LAFA0E02476g	LAMI0G02256g	SAKL0G15554g	KLTH0C01628g
L.A1	A1LA02-082446g	2	-	586	1537			ZYRO0B15070g							SAKL0G15576g
L.A1	A1LA02-082468g	2	+	587	1538	LANO0F16358g	LAME0E01354g	ZYRO0B15026g	LAWA0H01926g	LACI0C01222g	LAFE0C12706g	LADA0H19460g	LAFA0F21198g	LAMI0G02234g	SAKL0G15620g	KLTH0C01584g
L.A1	A1LA02-082490g	2	+	588	1539			ZYRO0B15004g						LAMI0G02212g	SAKL0G15642g
L.A1	A1LA02-082512g	2	-	589	1540	LANO0F16380g	LAME0E01332g	ZYRO0B14982g	LAWA0H01904g	LACI0C01200g	LAFE0C12728g	LADA0H19482g	LAFA0F21220g	LAMI0G02190g	SAKL0G15664g	KLTH0C01562g
L.A1	A1LA02-088474g	2	-	590	1541	LANO0F16402g	LAME0E01310g	ZYRO0B08294g	LAWA0H01882g	LACI0C01178g	LAFE0C12750g	LADA0H19504g	LAFA0F21242g	LAMI0G02168g	SAKL0H02684g	KLTH0C01540g
L.A1	A1LA02-088452g	2	-	591	1542	LANO0F16424g	LAME0E01288g	ZYRO0B08272g	LAWA0H01860g	LACI0C01156g	LAFE0C12772g	LADA0H19526g	LAFA0F21264g	LAMI0G02146g	SAKL0H02662g	KLTH0C01518g
L.A1	A1LA02-088408g	2	-	592	1543	LANO0F16468g	LAME0E01244g	ZYRO0B08228g	LAWA0H01816g	LACI0C01112g	LAFE0C12816g	LADA0H19570g	LAFA0F21308g	LAMI0G02102g	SAKL0H02618g	KLTH0C01474g
L.A1	A1LA02-088386g	2	+	593	1544	LANO0F16490g	LAME0E01222g	ZYRO0B08206g	LAWA0H01794g	LACI0C01090g	LAFE0C12838g	LADA0H19592g	LAFA0F21330g	LAMI0G02080g	SAKL0H02596g	KLTH0C01452g
L.A1	A1LA02-088364g	2	-	594	1545	LANO0F16512g	LAME0E01200g	ZYRO0B08184g	LAWA0H01772g	LACI0C01068g	LAFE0C12860g	LADA0H19614g	LAFA0F21352g	LAMI0G02058g	SAKL0H02574g	KLTH0C01430g
L.A1	A1LA02-088342g	2	-	595	1546	LANO0E13256g	LAME0C04170g	ZYRO0B08140g	LAWA0C09912g	LACI0H04852g	LAFE0H01376g	LADA0D08988g	LAFA0B03840g	LAMI0E00892g	SAKL0H02552g	KLTH0B04576g
L.A1	A1LA02-088320g	2	-	596	1547	LANO0E13278g	LAME0C04148g	ZYRO0F13508g	LAWA0C09934g	LACI0H04830g	LAFE0H01354g	LADA0D09010g	LAFA0B03818g	LAMI0E00870g	SAKL0H02530g	KLTH0B04554g
L.A1	A1LA02-088298g	2	+	597	1548	LANO0E00870g	LAME0B07492g	ZYRO0F13530g	LAWA0A12398g	LACI0H04786g	LAFE0H01288g	LADA0B00914g	LAFA0G23882g	LAMI0E00826g	SAKL0H02486g	KLTH0H00858g
L.A1	A1LA02-088276g	2	-	598	1549	LANO0E00892g	LAME0B07470g	ZYRO0F13596g	LAWA0A12376g	LACI0H04764g	LAFE0H01244g	LADA0B00936g	LAFA0G23860g	LAMI0E00804g	SAKL0H02464g	KLTH0H00748g
L.A1	A1LA02-088254g	2	-	599	1550	LANO0E00914g	LAME0B07448g	ZYRO0C11418g	LAWA0A12354g	LACI0H04742g	LAFE0H01222g	LADA0B00958g	LAFA0G23838g	LAMI0E00782g	SAKL0H02442g	KLTH0H00902g
L.A1	A1LA02-088232g	2	-	600	1551	LANO0E00936g	LAME0B07426g	ZYRO0C11440g	LAWA0A12332g	LACI0H04720g	LAFE0H01200g	LADA0B00980g	LAFA0G23816g	LAMI0E00760g	SAKL0H02420g	KLTH0H00924g
L.A1	A1LA02-088210g	2	+	601	1552	LANO0E00958g	LAME0B07404g	ZYRO0C11462g	LAWA0A12310g	LACI0H04698g	LAFE0H01178g	LADA0B01002g	LAFA0G23794g	LAMI0E00694g	SAKL0H02398g	KLTH0H00946g
L.A1	A1LA02-088188g	2	+	602	1553	LANO0E00804g	LAME0B07514g	ZYRO0C11484g		LACI0H04676g	LAFE0H01156g	LADA0B00826g	LAFA0G23926g	LAMI0E00694g	SAKL0H02376g	KLTH0H00836g
L.A1	A1LA02-088166g	2	+	603	1554	LANO0E00782g	LAME0B07536g	ZYRO0C11506g	LAWA0A12420g	LACI0H04654g	LAFE0H01134g	LADA0B00804g	LAFA0G23948g	LAMI0E00672g	SAKL0H02354g	KLTH0H00814g
L.A1	A1LA02-088122g	2	-	604	1555	LANO0E00738g	LAME0B07602g	ZYRO0C11528g	LAWA0A12464g	LACI0H04610g	LAFE0H01090g	LADA0B00760g	LAFA0G23992g	LAMI0E00628g	SAKL0H02310g	KLTH0H00770g
L.A1	A1LA02-088100g	2	-	605	1556	LANO0E00716g	LAME0B07624g	ZYRO0C11550g	LAWA0A12486g	LACI0H04588g	LAFE0H01068g	LADA0B00738g	LAFA0G24014g	LAMI0E00606g	SAKL0H02288g	KLTH0H00737g
L.A1	A1LA02-088078g	2	-	606	1557	LANO0E00694g	LAME0B07646g	ZYRO0C11572g	LAWA0A12508g	LACI0H04566g	LAFE0H01046g	LADA0B00716g	LAFA0G24036g	LAMI0E00562g	SAKL0H02266g	KLTH0H00726g
L.A1	A1LA02-088056g	2	-	607	1558	LANO0E00672g	LAME0B07668g	ZYRO0C11594g	LAWA0A12530g	LACI0H04544g	LAFE0H01024g	LADA0B00694g	LAFA0G24058g	LAMI0E00540g	SAKL0H02244g	KLTH0H00704g
L.A1	A1LA02-088034g	2	+	608	1559	LANO0E00650g	LAME0B07690g	ZYRO0C11616g	LAWA0A12552g	LACI0H04522g	LAFE0H01002g	LADA0B00672g	LAFA0G24080g	LAMI0E00518g	SAKL0H02222g	KLTH0H00682g
L.A1	A1LA02-088012g	2	+	609	1560	LANO0E00628g	LAME0B07712g	ZYRO0C11638g	LAWA0A12574g	LACI0D00694g	LAFE0H00980g	LADA0B00650g	LAFA0G24102g	LAMI0E00496g	SAKL0H02200g	KLTH0H00660g
L.A1	A1LA02-087990g	2	+	610	1561	LANO0E00606g	LAME0B07734g	ZYRO0C11660g	LAWA0A12596g	LACI0D00672g	LAFE0H00958g	LADA0B00628g	LAFA0G24124g	LAMI0E00474g	SAKL0H02178g	KLTH0H00638g
L.A1	A1LA02-087968g	2	+	611	1562	LANO0E00584g	LAME0B07756g	ZYRO0C11682g	LAWA0A12618g	LACI0D00650g	LAFE0H00936g	LADA0B00606g	LAFA0G24146g	LAMI0E00452g	SAKL0H02156g	KLTH0H00616g
L.A1	A1LA02-087946g	2	+	612	1563	LANO0E00562g	LAME0B07778g	ZYRO0C11704g	LAWA0A12640g	LACI0D00628g	LAFE0H00914g	LADA0B00584g	LAFA0G24168g	LAMI0E00430g	SAKL0H02134g	KLTH0H00594g
L.A1	A1LA02-087924g	2	+	613	1564	LANO0E00540g	LAME0B07800g	ZYRO0C11726g	LAWA0A12662g	LACI0D00606g	LAFE0H00892g	LADA0B00562g	LAFA0G24190g	LAMI0E00408g	SAKL0H02112g	KLTH0H00572g
L.A1	A1LA02-087902g	2	+	614	1565	LANO0E00518g	LAME0B07822g	ZYRO0C11748g	LAWA0A12684g	LACI0D00584g	LAFE0H00870g	LADA0B00540g	LAFA0G24212g	LAMI0E00386g	SAKL0H02101g	KLTH0H00550g
L.A1	A1LA02-087880g	2	-	615	1566	LANO0E00496g	LAME0B07844g	ZYRO0C11770g	LAWA0A12706g	LACI0D00562g	LAFE0H00848g	LADA0B00518g	LAFA0G24234g	LAMI0E00364g	SAKL0H02068g	KLTH0H00528g
L.A1	A1LA02-087858g	2	+	616	1567	LANO0C08130g	LAME0G07008g	ZYRO0C11792g	LAWA0G07690g	LACI0H05710g	LAFE0H02212g	LADA0F01618g	LAFA0E03906g	LAMI0F15016g	SAKL0H02046g	KLTH0B08492g
L.A1	A1LA02-087836g	2	+	617	1568	LANO0C08152g	LAME0G06964g	ZYRO0C11814g	LAWA0G07668g	LACI0H05688g	LAFE0H02190g	LADA0F01596g	LAFA0E03862g	LAMI0F15038g	SAKL0H02024g	KLTH0B08514g
L.A1	A1LA02-087814g	2	+	618	1569	LANO0C08174g	LAME0G06942g	ZYRO0C11836g	LAWA0G07646g	LACI0H05666g	LAFE0H02168g	LADA0F01574g	LAFA0E03840g	LAMI0F15060g	SAKL0H02002g	KLTH0B08536g
L.A1	A1LA02-087792g	2	+	619	1570	LANO0C08196g	LAME0G06920g	ZYRO0C11858g	LAWA0G07624g	LACI0H05644g	LAFE0H02146g		LAFA0E03818g		SAKL0H01980g	KLTH0B08558g
L.A1	A1LA02-087770g	2	+	620	1571	LANO0C08218g	LAME0G06898g	ZYRO0C11880g	LAWA0G07602g	LACI0H05622g	LAFE0H02124g	LADA0F01552g	LAFA0E03796g	LAMI0F15082g	SAKL0H01958g	KLTH0B08580g
L.A1	A1LA02-087748g	2	+	621	1572	LANO0C08240g	LAME0G06876g	ZYRO0D07898g	LAWA0G07580g	LACI0H05600g	LAFE0H02102g	LADA0F01530g	LAFA0E03774g	LAMI0F15126g	SAKL0H01892g	KLTH0B08624g
L.A1	A1LA02-087704g	2	+	622	1573	LANO0C08284g	LAME0G06832g	ZYRO0D07876g	LAWA0G07536g	LACI0H05556g	LAFE0H02058g	LADA0B02058g	LAFA0E01640g	LAMI0F15170g	SAKL0H01848g	KLTH0B08668g
L.A1	A1LA02-087682g	2	+	623	1574	LANO0C08306g	LAME0G06810g	ZYRO0D07854g	LAWA0G07514g	LACI0H05534g	LAFE0H02036g	LADA0B02036g	LAFA0E01618g	LAMI0F15192g	SAKL0H01826g	KLTH0B08690g
L.A1	A1LA02-087660g	2	-	624	1575	LANO0C08328g	LAME0G06788g	ZYRO0D07832g	LAWA0G07492g	LACI0H05512g	LAFE0H02014g	LADA0B02014g	LAFA0E01596g	LAMI0F15214g	SAKL0H01804g	KLTH0B08712g
L.A1	A1LA02-087638g	2	-	625	1576	LANO0C08350g	LAME0G06766g	ZYRO0D07810g	LAWA0G07470g	LACI0H05490g	LAFE0H01992g	LADA0B01992g	LAFA0E01574g	LAMI0F15236g	SAKL0H01782g	KLTH0B08734g
L.A1	A1LA02-087616g	2	-	626	1577	LANO0C08372g	LAME0G06744g	ZYRO0D07788g	LAWA0G07448g	LACI0H05468g	LAFE0H01970g	LADA0B01970g	LAFA0E01552g	LAMI0F15258g	SAKL0H01760g	KLTH0B08756g
L.A1	A1LA02-087594g	2	-	627	1578	LANO0C08394g	LAME0H01464g	ZYRO0D07744g	LAWA0G07426g	LACI0F19086g	LAFE0E13806g	LADA0B01948g	LAFA0E01530g	LAMI0F15302g	SAKL0H01628g	KLTH0B08800g
L.A1	A1LA02-087572g	2	+	628	1579	LANO0C08416g	LAME0H01442g	ZYRO0D07722g	LAWA0G07404g	LACI0F19108g	LAFE0E13828g	LADA0B01926g	LAFA0E01508g	LAMI0F15324g	SAKL0H01606g	KLTH0B08822g
L.A1	A1LA02-087550g	2	-	629	1580	LANO0C08438g	LAME0H01420g	ZYRO0D07700g	LAWA0G07382g	LACI0F19130g	LAFE0E13850g	LADA0B01904g	LAFA0E01486g	LAMI0F15346g	SAKL0H01584g	KLTH0B08844g
L.A1	A1LA02-087528g	2	+	630	1581	LANO0C08460g	LAME0H01398g	ZYRO0D07678g	LAWA0G07360g	LACI0F19152g	LAFE0E13872g	LADA0B01882g	LAFA0E01464g	LAMI0F15610g	SAKL0H01562g	KLTH0B08866g
L.A1	A1LA02-087506g	2	-	631	1582	LANO0C08482g	LAME0H01376g	ZYRO0D07656g	LAWA0G07338g	LACI0F19174g	LAFE0E13894g	LADA0B01860g	LAFA0E01442g	LAMI0F15588g	SAKL0H01540g	KLTH0B08888g
L.A1	A1LA02-087484g	2	+	632	1583	LANO0C08504g	LAME0H01332g	ZYRO0D07634g	LAWA0G07316g	LACI0F19218g	LAFE0E13916g	LADA0B01816g	LAFA0E01398g	LAMI0F15544g	SAKL0H01496g	KLTH0B08932g
L.A1	A1LA02-087462g	2	-	633	1584	LANO0C08526g	LAME0H01310g	ZYRO0D07612g	LAWA0G07294g	LACI0F19240g	LAFE0E13938g	LADA0B01794g	LAFA0E01376g	LAMI0F15522g	SAKL0H01474g	KLTH0B08954g
L.A1	A1LA02-087440g	2	-	634	1585	LANO0C08548g	LAME0H01288g	ZYRO0D07568g	LAWA0G07272g	LACI0F19262g	LAFE0E13960g	LADA0B01772g	LAFA0E01354g	LAMI0F15500g	SAKL0H01452g	KLTH0B08976g
L.A1	A1LA02-087418g	2	-	635	1586	LANO0C08570g	LAME0H01266g	ZYRO0D07546g	LAWA0G07250g	LACI0F19284g	LAFE0E13982g	LADA0B01750g	LAFA0E01332g	LAMI0F15478g	SAKL0H01430g	KLTH0B08998g
L.A1	A1LA02-087396g	2	+	636	1587	LANO0C08592g	LAME0H01244g	ZYRO0D07524g	LAWA0G07206g	LACI0F19306g	LAFE0E14004g	LADA0B01728g	LAFA0E01310g	LAMI0F15456g	SAKL0H01386g	KLTH0B09020g
L.A1	A1LA02-087374g	2	+	637	1588	LANO0C08614g	LAME0H01222g	ZYRO0D07502g	LAWA0G07184g	LACI0F19328g	LAFE0E14026g	LADA0B01706g	LAFA0E01288g	LAMI0F15434g	SAKL0H01364g	KLTH0B09042g
L.A1	A1LA02-087352g	2	-	638	1589	LANO0C08636g	LAME0H01200g	ZYRO0D07480g	LAWA0G07162g	LACI0F19350g	LAFE0E14048g	LADA0B01684g	LAFA0E01266g	LAMI0F15412g	SAKL0H01342g	KLTH0B09064g
L.A1	A1LA02-087330g	2	-	639	1590	LANO0C08658g	LAME0H01178g	ZYRO0D07458g	LAWA0G07140g	LACI0F19372g	LAFE0E14070g	LADA0B01662g	LAFA0E01244g	LAMI0F15390g	SAKL0H01320g	KLTH0B09086g
L.A1	A1LA02-087308g	2	+	640	1591	LANO0C08680g	LAME0H01156g	ZYRO0D07436g	LAWA0G07118g	LACI0F19394g	LAFE0E14092g	LADA0B01640g	LAFA0E01222g	LAMI0F15654g	SAKL0H01298g	KLTH0B09108g
L.A1	A1LA02-087286g	2	+	641	1592	LANO0C08702g	LAME0H01134g	ZYRO0D07414g	LAWA0G07096g	LACI0F19416g	LAFE0E14114g	LADA0B01618g	LAFA0E01200g	LAMI0F15676g	SAKL0H01276g	KLTH0B09130g
L.A1	A1LA02-087264g	2	-	642	1593	LANO0C08724g	LAME0H01112g	ZYRO0D07392g	LAWA0G07074g	LACI0F19438g	LAFE0E14136g	LADA0B01596g	LAFA0E01178g	LAMI0F15698g	SAKL0H01254g	KLTH0B09152g
L.A1	A1LA02-087242g	2	+	643	1594	LANO0C08746g	LAME0H01090g	ZYRO0D07370g	LAWA0E13960g	LACI0F19460g	LAFE0E14158g	LADA0B01574g	LAFA0E01156g		SAKL0H01232g	KLTH0B09174g
L.A1	A1LA02-087220g	2	+	644	1595	LANO0C08768g	LAME0H01068g	ZYRO0D07348g	LAWA0E13982g	LACI0F19482g	LAFE0E14180g	LADA0B01552g	LAFA0E01134g	LAMI0F15720g	SAKL0H01210g	KLTH0B09196g
L.A1	A1LA02-087198g	2	-	645	1596	LANO0C08812g	LAME0H01046g	ZYRO0D07326g	LAWA0E14004g	LACI0F19504g	LAFE0E14202g	LADA0B01530g	LAFA0E01112g	LAMI0F15742g	SAKL0H01188g	KLTH0B09218g
L.A1	A1LA02-087176g	2	-	646	1597	LANO0C08834g	LAME0H01024g	ZYRO0D07304g	LAWA0E14026g	LACI0F19526g	LAFE0E14224g	LADA0B01508g	LAFA0E01090g	LAMI0F15764g	SAKL0H01166g	KLTH0B09240g
L.A1	A1LA02-087154g	2	-	647	1598	LANO0C08900g	LAME0H00958g	ZYRO0D07282g	LAWA0E14092g	LACI0F19548g	LAFE0E14246g	LADA0B01464g	LAFA0E01046g	LAMI0F15808g	SAKL0H01144g	KLTH0B09306g
L.A1	A1LA02-087132g	2	+	648	1599	LANO0C08922g	LAME0H00936g	ZYRO0D07260g	LAWA0E14114g	LACI0F19570g	LAFE0E14268g	LADA0B01442g	LAFA0E01024g	LAMI0F15830g	SAKL0H01122g	KLTH0B09328g
L.A1	A1LA02-087110g	2	+	649	1600	LANO0C08944g	LAME0H00914g	ZYRO0D07238g	LAWA0E14136g	LACI0F19592g	LAFE0E14290g	LADA0B01420g	LAFA0E01002g	LAMI0F15852g	SAKL0H01100g	KLTH0B09350g
L.A1	A1LA02-087088g	2	-	650	1601	LANO0C08966g	LAME0H00892g	ZYRO0D07216g	LAWA0E14158g	LACI0F19614g	LAFE0E14312g	LADA0B01398g	LAFA0E00980g	LAMI0F15874g	SAKL0H01078g	KLTH0B09372g
L.A1	A1LA02-087066g	2	+	651	1602	LANO0C08988g	LAME0H00870g	ZYRO0D07194g	LAWA0E14180g	LACI0F19636g	LAFE0E14356g	LADA0B01376g	LAFA0E00958g	LAMI0F15896g	SAKL0H01056g	KLTH0B09394g
L.A1	A1LA02-087044g	2	-	652	1603	LANO0C09010g	LAME0H00848g	ZYRO0D07172g	LAWA0E14202g	LACI0F19658g	LAFE0E14378g	LADA0B01354g	LAFA0E00936g	LAMI0F15918g	SAKL0H01034g	KLTH0B09416g
L.A1	A1LA02-087022g	2	-	653	1604	LANO0C09032g	LAME0H00826g	ZYRO0D07150g	LAWA0E14224g	LACI0F19680g	LAFE0E14400g	LADA0B01332g	LAFA0E00914g		SAKL0H01012g	KLTH0B09438g
L.A1	A1LA02-087000g	2	-	654	1605	LANO0C09054g	LAME0H00804g	ZYRO0D07128g	LAWA0E14246g	LACI0F19702g	LAFE0E14422g	LADA0B01310g	LAFA0E00892g	LAMI0F15940g	SAKL0H00990g	KLTH0B09460g
L.A1	A1LA02-086978g	2	-	655	1606	LANO0C09076g	LAME0H00782g	ZYRO0D07106g	LAWA0E14268g	LACI0F19724g	LAFE0E14444g	LADA0B01288g	LAFA0E00870g	LAMI0F15962g	SAKL0H00968g	KLTH0B09482g
L.A1	A1LA02-086956g	2	-	656	1607	LANO0C09098g	LAME0H00760g	ZYRO0C01144g	LAWA0E14290g	LACI0F19746g	LAFE0E14466g	LADA0B01266g	LAFA0E00848g	LAMI0F15984g	SAKL0H00946g	KLTH0B09504g
L.A1	A1LA02-086934g	2	+	657	1608	LANO0C09120g	LAME0H00738g	ZYRO0C01166g	LAWA0E14312g	LACI0F19768g	LAFE0E14488g	LADA0B01244g	LAFA0E00760g	LAMI0F16006g	SAKL0H00902g	KLTH0B09526g
L.A1	A1LA02-086912g	2	-	658	1609	LANO0C09142g	LAME0H00716g	ZYRO0C01188g	LAWA0E14334g	LACI0F19790g	LAFE0E14510g	LADA0B01222g	LAFA0E00738g	LAMI0F16028g	SAKL0H00880g	KLTH0B09548g
L.A1	A1LA02-086890g	2	+	659	1610	LANO0C09164g	LAME0H00694g	ZYRO0C01210g	LAWA0E14356g	LACI0F19812g	LAFE0E14532g	LADA0B01200g	LAFA0E00716g	LAMI0F16050g	SAKL0H00858g	KLTH0B09570g
L.A1	A1LA02-086868g	2	+	660	1611	LANO0C09186g	LAME0H00672g	ZYRO0C01232g	LAWA0E14378g	LACI0F19834g	LAFE0E14554g	LADA0B01178g	LAFA0E00694g	LAMI0F16072g	SAKL0H00836g	KLTH0B09592g
L.A1	A1LA02-086846g	2	+	661	1612	LANO0C09208g	LAME0H00650g	ZYRO0C01254g	LAWA0E14400g	LACI0F19856g	LAFE0E14576g	LADA0B01156g	LAFA0E00672g	LAMI0F16094g	SAKL0H00814g	KLTH0B09614g
L.A1	A1LA02-086824g	2	+	662	1613	LANO0C09230g	LAME0H00628g	ZYRO0C01276g		LACI0F19878g	LAFE0E14598g	LADA0B01134g	LAFA0E00650g	LAMI0F16116g	SAKL0H00792g	KLTH0B09636g
L.A1	A1LA02-086802g	2	+	663	1614	LANO0C09252g	LAME0H00606g	ZYRO0C01298g	LAWA0E14444g	LACI0F19900g	LAFE0E14620g	LADA0B01112g	LAFA0E00628g	LAMI0F16138g	SAKL0H00770g	KLTH0B09658g
L.A1	A1LA02-086780g	2	+	664	1615	LANO0C09274g	LAME0H00584g	ZYRO0C01320g	LAWA0E14466g	LACI0F19922g	LAFE0E14642g	LADA0B01090g	LAFA0E00606g	LAMI0F16160g	SAKL0H00748g	KLTH0B09680g
L.A1	A1LA02-086626g	2	+	665	1616	LANO0C09428g	LAME0H00474g	ZYRO0C01408g	LAWA0E14554g	LACI0F20054g	LAFE0E14796g	LADA0E14708g	LAFA0E00496g	LAMI0F16292g	SAKL0H00594g	KLTH0B09768g
L.A1	A1LA02-086604g	2	+	666	1617	LANO0C09450g	LAME0H00452g	ZYRO0D06930g	LAWA0E14576g	LACI0F20076g	LAFE0E14818g	LADA0E14730g	LAFA0E00474g	LAMI0F16314g	SAKL0H00572g	KLTH0B09790g
L.A1	A1LA02-086560g	2	-	667	1618	LANO0C09494g	LAME0H00408g	ZYRO0D06952g	LAWA0E14620g	LACI0F20120g	LAFE0E14862g	LADA0E14774g	LAFA0E00430g	LAMI0F16358g	SAKL0H00528g	KLTH0B09834g
L.A1	A1LA02-086538g	2	-	668	1619	LANO0C09516g	LAME0H00166g	ZYRO0D06974g	LAWA0E14642g	LACI0F20142g	LAFE0E14884g	LADA0E14796g	LAFA0E00408g	LAMI0F16380g	SAKL0H00506g	KLTH0B09856g
L.A1	A1LA02-086516g	2	+	669	1620	LANO0C09538g	LAME0H00364g	ZYRO0D06996g	LAWA0E14664g	LACI0F20164g	LAFE0E14906g	LADA0E14818g	LAFA0E00386g	LAMI0F16402g	SAKL0H00484g	KLTH0B09878g
L.A1	A1LA02-086494g	2	-	670	1621	LANO0C09560g	LAME0H00342g	ZYRO0D07018g	LAWA0E14686g	LACI0F20186g	LAFE0E14928g	LADA0E14840g	LAFA0E00364g	LAMI0F16424g	SAKL0H00462g	KLTH0B09900g
L.A1	A1LA02-086472g	2	+	671	1622	LANO0C09582g	LAME0H00320g	ZYRO0D07040g	LAWA0E14708g	LACI0F20208g	LAFE0E14950g	LADA0E14862g	LAFA0E00342g	LAMI0F16446g	SAKL0H00440g	KLTH0B09922g
L.A1	A1LA02-086450g	2	-	672	1623	LANO0C09604g	LAME0H00298g	ZYRO0D07062g	LAWA0E14730g	LACI0F20230g	LAFE0E14972g	LADA0E14884g	LAFA0E00320g	LAMI0F16468g	SAKL0H00418g	KLTH0B09944g
L.A1	A1LA02-086428g	2	+	673	1624	LANO0C09626g	LAME0H00276g	ZYRO0D07084g	LAWA0E14752g	LACI0F20252g	LAFE0E14994g	LADA0E14906g	LAFA0E00298g	LAMI0F16490g	SAKL0H00396g	KLTH0B09966g
L.A1	A1LA03-068806g	3	+	1	1625	LANO0E00342g	LAME0B07998g	ZYRO0F15730g	LAWA0A12860g	LACI0D00386g	LAFE0H00672g	LADA0B00364g	LAFA0G24388g	LAMI0E00188g	SAKL0G00418g	KLTH0H00330g
L.A1	A1LA03-068784g	3	+	2	1626	LANO0E00364g	LAME0B07976g	ZYRO0F15708g	LAWA0A12838g	LACI0D00408g	LAFE0H00694g	LADA0B00386g	LAFA0G24366g	LAMI0E00210g	SAKL0G00396g	KLTH0H00352g
L.A1	A1LA03-068762g	3	-	3	1627	LANO0E00386g	LAME0B07954g	ZYRO0F15686g	LAWA0A12816g	LACI0D00430g	LAFE0H00716g	LADA0B00408g	LAFA0G24344g	LAMI0E00232g	SAKL0G00374g	KLTH0H00374g
L.A1	A1LA03-068740g	3	-	4	1628	LANO0E00408g	LAME0B07932g	ZYRO0F15642g	LAWA0A12794g	LACI0D00452g	LAFE0H00738g	LADA0B00430g	LAFA0G24322g	LAMI0E00254g	SAKL0G00352g	KLTH0H00396g
L.A1	A1LA03-068828g	3	+	5	1629	LANO0E00430g	LAME0B07910g	ZYRO0F15598g	LAWA0A12772g	LACI0D00496g	LAFE0H00782g	LADA0B00452g	LAFA0G24300g	LAMI0E00298g	SAKL0G00440g	KLTH0H00418g
L.A1	A1LA03-068850g	3	+	6	1630	LANO0E00452g	LAME0B07888g	ZYRO0F15576g	LAWA0A12750g	LACI0D00518g	LAFE0H00804g	LADA0B00474g	LAFA0G24278g	LAMI0E00320g	SAKL0G00462g	KLTH0H00440g
L.A1	A1LA03-054088g	3	+	7	1631			ZYRO0F15554g							SAKL0E14388g
L.A1	A1LA03-054066g	3	+	8	1632	LANO0C08108g	LAME0G07030g	ZYRO0F15532g	LAWA0G07712g	LACI0H05732g	LAFE0H02234g	LADA0F01640g	LAFA0E03928g	LAMI0F14994g	SAKL0E14366g	KLTH0B08470g
L.A1	A1LA03-054044g	3	+	9	1633	LANO0C08086g	LAME0G07052g	ZYRO0F15510g	LAWA0G07734g	LACI0H05754g	LAFE0H02256g	LADA0F01662g	LAFA0E03950g	LAMI0F14950g	SAKL0E14344g	KLTH0B08448g
L.A1	A1LA03-054022g	3	+	10	1634	LANO0C08064g	LAME0G07074g	ZYRO0F15488g	LAWA0G07756g	LACI0H05776g	LAFE0H02278g	LADA0F01684g	LAFA0E03972g	LAMI0F14928g	SAKL0E14322g	KLTH0B08426g
L.A1	A1LA03-054000g	3	-	11	1635	LANO0C08042g	LAME0G07096g	ZYRO0F15466g	LAWA0G07778g	LACI0H05798g	LAFE0H02300g	LADA0F01706g	LAFA0E03994g	LAMI0F14906g	SAKL0E14300g	KLTH0B08404g
L.A1	A1LA03-053978g	3	-	12	1636	LANO0C07998g	LAME0G07140g	ZYRO0F15444g	LAWA0G07800g	LACI0H05820g	LAFE0H02322g	LADA0F01794g	LAFA0E04038g	LAMI0F14884g	SAKL0E14278g	KLTH0B08382g
L.A1	A1LA03-053956g	3	-	13	1637	LANO0C07976g	LAME0G07162g	ZYRO0F15422g	LAWA0G07822g	LACI0H05842g	LAFE0H02344g	LADA0F01816g	LAFA0E04060g	LAMI0F14862g	SAKL0E14256g	KLTH0B08360g
L.A1	A1LA03-053934g	3	-	14	1638	LANO0C07954g	LAME0G07184g	ZYRO0F15400g	LAWA0G07844g	LACI0H05864g	LAFE0H02366g	LADA0F01838g	LAFA0E04082g	LAMI0F14840g	SAKL0E14234g	KLTH0B08338g
L.A1	A1LA03-053912g	3	-	15	1639	LANO0C07932g	LAME0G07206g	ZYRO0F15378g	LAWA0G07866g	LACI0H05886g	LAFE0H02388g	LADA0F01860g	LAFA0E04104g	LAMI0F14818g	SAKL0E14212g	KLTH0B08316g
L.A1	A1LA03-053890g	3	-	16	1640	LANO0C07910g	LAME0G07228g	ZYRO0F15356g		LACI0H05908g	LAFE0H02410g	LADA0F01882g	LAFA0E04126g	LAMI0F14796g	SAKL0E14146g	KLTH0B08294g
L.A1	A1LA03-053868g	3	+	17	1641	LANO0C07888g	LAME0G07272g	ZYRO0F15334g	LAWA0G07910g	LACI0H05930g	LAFE0H02432g	LADA0F01904g	LAFA0E04170g	LAMI0F14774g	SAKL0E14124g	KLTH0B08272g
L.A1	A1LA03-053846g	3	+	18	1642	LANO0C07866g	LAME0G07294g	ZYRO0F15312g	LAWA0G07932g	LACI0H05952g	LAFE0H02454g	LADA0F01926g	LAFA0E04192g	LAMI0F14752g	SAKL0E14102g	KLTH0B08250g
L.A1	A1LA03-053824g	3	-	19	1643	LANO0C07844g	LAME0G07316g	ZYRO0F15290g	LAWA0G07943g	LACI0H05974g	LAFE0H02476g	LADA0F01948g	LAFA0E04214g	LAMI0F14730g	SAKL0E14080g	KLTH0B08228g
L.A1	A1LA03-053802g	3	+	20	1644	LANO0H04896g	LAME0F15610g	ZYRO0F15268g	LAWA0G07954g	LACI0H05996g	LAFE0H02498g	LADA0G06436g	LAFA0F15720g	LAMI0F14708g	SAKL0E14058g	KLTH0B08206g
L.A1	A1LA03-053780g	3	-	21	1645	LANO0H04852g	LAME0F15654g	ZYRO0F15224g	LAWA0G07998g	LACI0H06040g	LAFE0H02542g	LADA0G06480g	LAFA0F15676g	LAMI0F14664g	SAKL0E14014g	KLTH0B08162g
L.A1	A1LA03-053758g	3	+	22	1646	LANO0H04830g	LAME0F15676g	ZYRO0F15202g		LACI0H06062g	LAFE0H02564g	LADA0G06502g	LAFA0F15654g	LAMI0F14642g	SAKL0E13992g	KLTH0B08118g
L.A1	A1LA03-053736g	3	-	23	1647	LANO0H04808g	LAME0F15698g	ZYRO0F15180g	LAWA0G08064g	LACI0H06084g	LAFE0H02586g	LADA0G06524g	LAFA0F15632g	LAMI0F14620g	SAKL0E13970g	KLTH0B08096g
L.A1	A1LA03-053714g	3	+	24	1648	LANO0H04786g	LAME0F15720g	ZYRO0F15158g	LAWA0G08086g	LACI0H06106g	LAFE0H02608g	LADA0G06546g	LAFA0F15610g	LAMI0F14598g	SAKL0E13948g	KLTH0B08074g
L.A1	A1LA03-053692g	3	+	25	1649	LANO0H04764g	LAME0F15742g	ZYRO0F15136g	LAWA0G08108g	LACI0H06128g	LAFE0H02630g	LADA0G06568g	LAFA0F15588g	LAMI0F14576g	SAKL0E13926g	KLTH0B08052g
L.A1	A1LA03-053670g	3	-	26	1650	LANO0H04742g	LAME0F15764g	ZYRO0F15114g	LAWA0G08130g	LACI0H06150g	LAFE0H02652g	LADA0G06590g	LAFA0F15566g	LAMI0F14554g	SAKL0E13904g	KLTH0B08030g
L.A1	A1LA03-053648g	3	+	27	1651	LANO0H04720g	LAME0F15786g	ZYRO0F15092g	LAWA0G08152g	LACI0H06172g	LAFE0H02674g	LADA0G06612g	LAFA0F15544g	LAMI0F14532g	SAKL0E13882g	KLTH0B08008g
L.A1	A1LA03-053626g	3	+	28	1652	LANO0H04698g	LAME0F15808g	ZYRO0C10692g	LAWA0G08174g	LACI0H06194g	LAFE0H02696g	LADA0G06634g	LAFA0F15522g	LAMI0F14510g	SAKL0E13860g	KLTH0B07986g
L.A1	A1LA03-053604g	3	-	29	1653	LANO0H04676g	LAME0F15830g	ZYRO0C10670g	LAWA0G08196g	LACI0H06216g	LAFE0H02718g	LADA0G06656g	LAFA0F15500g	LAMI0F14488g	SAKL0E13838g	KLTH0B07964g
L.A1	A1LA03-053582g	3	+	30	1654	LANO0H04654g	LAME0F15852g	ZYRO0C10648g	LAWA0G08218g	LACI0H06238g	LAFE0H02740g	LADA0G06678g	LAFA0F15478g	LAMI0F14466g	SAKL0E13816g	KLTH0B07942g
L.A1	A1LA03-053560g	3	+	31	1655	LANO0H04632g	LAME0F15874g	ZYRO0C10626g	LAWA0G08240g	LACI0H06260g	LAFE0H02762g	LADA0G06700g	LAFA0F15456g	LAMI0F14444g	SAKL0E13794g	KLTH0B07920g
L.A1	A1LA03-053538g	3	+	32	1656	LANO0H04610g	LAME0F15896g	ZYRO0C10604g	LAWA0G08262g	LACI0H06282g	LAFE0H02784g	LADA0G06722g	LAFA0F15434g	LAMI0F14422g	SAKL0E13772g	KLTH0B07898g
L.A1	A1LA03-053516g	3	-	33	1657	LANO0H04588g	LAME0F15918g	ZYRO0C10582g	LAWA0G08284g	LACI0H06304g	LAFE0H02806g	LADA0G06744g	LAFA0F15412g	LAMI0F14400g	SAKL0E13750g	KLTH0B07876g
L.A1	A1LA03-053494g	3	+	34	1658	LANO0H04566g	LAME0F15940g	ZYRO0C10560g	LAWA0G08306g	LACI0H06326g	LAFE0H02828g	LADA0G06788g	LAFA0F15390g	LAMI0F14378g	SAKL0E13728g	KLTH0B07854g
L.A1	A1LA03-053472g	3	-	35	1659	LANO0H04544g	LAME0F15962g	ZYRO0C10538g	LAWA0G08328g	LACI0H06348g	LAFE0H02850g	LADA0G06810g	LAFA0F15368g	LAMI0F14356g	SAKL0E13706g	KLTH0B07832g
L.A1	A1LA03-053450g	3	-	36	1660	LANO0H04522g	LAME0F15984g	ZYRO0C10516g	LAWA0G08372g	LACI0H06370g	LAFE0H02872g	LADA0G06832g	LAFA0F15346g	LAMI0F14334g	SAKL0E13684g	KLTH0B07810g
L.A1	A1LA03-053428g	3	+	37	1661	LANO0H04500g	LAME0F16006g	ZYRO0C10494g	LAWA0G08394g	LACI0H06392g	LAFE0H02894g	LADA0G06854g	LAFA0F15324g	LAMI0F14312g	SAKL0E13662g	KLTH0B07788g
L.A1	A1LA03-053384g	3	+	38	1662	LANO0H04456g	LAME0F16050g	ZYRO0C10450g	LAWA0G08438g	LACI0H06436g	LAFE0H02938g	LADA0G06898g	LAFA0F15280g	LAMI0F14268g	SAKL0E13618g	KLTH0B07744g
L.A1	A1LA03-053362g	3	+	39	1663			ZYRO0C10384g							SAKL0E13574g
L.A1	A1LA03-053340g	3	+	40	1664	LANO0H04412g	LAME0F16116g	ZYRO0C10340g	LAWA0G08482g	LACI0H06480g	LAFE0H02982g	LADA0G06942g	LAFA0F15258g	LAMI0F14224g	SAKL0E13552g	KLTH0B07722g
L.A1	A1LA03-053318g	3	-	41	1665	LANO0H04390g	LAME0F16138g	ZYRO0C10318g		LACI0H06502g	LAFE0H03004g	LADA0G06964g	LAFA0F15236g	LAMI0F14202g	SAKL0E13530g	KLTH0B07700g
L.A1	A1LA03-053296g	3	-	42	1666	LANO0H04368g	LAME0F16160g	ZYRO0C10296g	LAWA0G08526g	LACI0H06524g	LAFE0H03026g	LADA0G06986g	LAFA0F15214g	LAMI0F14180g	SAKL0E13486g	KLTH0B07678g
L.A1	A1LA03-053274g	3	+	43	1667	LANO0H04346g	LAME0F16182g	ZYRO0C10274g	LAWA0G08548g	LACI0H06546g	LAFE0H03048g	LADA0G07008g	LAFA0F15192g	LAMI0F14158g	SAKL0E13464g	KLTH0B07656g
L.A1	A1LA03-053252g	3	-	44	1668	LANO0H04324g	LAME0F16204g	ZYRO0C10252g	LAWA0G08570g	LACI0H06568g	LAFE0H03070g	LADA0G07030g	LAFA0F15170g	LAMI0F14136g	SAKL0E13442g	KLTH0B07634g
L.A1	A1LA03-053230g	3	-	45	1669	LANO0H04302g	LAME0F16226g	ZYRO0C10230g	LAWA0G08592g	LACI0H06590g	LAFE0H03092g	LADA0G07052g	LAFA0F15148g	LAMI0F14114g	SAKL0E13420g	KLTH0B07612g
L.A1	A1LA03-053208g	3	-	46	1670	LANO0H04280g	LAME0F16248g	ZYRO0C10208g	LAWA0G08614g	LACI0H06612g	LAFE0H03114g	LADA0G07074g	LAFA0F15126g	LAMI0F14092g	SAKL0E13398g	KLTH0B07590g
L.A1	A1LA03-053186g	3	+	47	1671	LANO0H04258g	LAME0F16270g	ZYRO0C10186g	LAWA0G08636g	LACI0H06634g	LAFE0H03136g	LADA0E06546g	LAFA0F15104g	LAMI0F14048g	SAKL0E13376g	KLTH0B07568g
L.A1	A1LA03-053164g	3	-	48	1672	LANO0H04236g	LAME0F16292g	ZYRO0C10164g	LAWA0G08658g	LACI0H06656g	LAFE0H03158g	LADA0E06524g	LAFA0F15082g	LAMI0F14026g	SAKL0E13354g	KLTH0B07546g
L.A1	A1LA03-053076g	3	-	49	1673	LANO0H04170g	LAME0F16358g	ZYRO0C10098g	LAWA0G08746g	LACI0H06722g	LAFE0H03246g	LADA0E06458g	LAFA0F15016g	LAMI0F13960g	SAKL0E13266g	KLTH0B07436g
L.A1	A1LA03-053054g	3	+	50	1674	LANO0H04148g	LAME0F16380g	ZYRO0C10076g	LAWA0G08768g	LACI0H06744g	LAFE0H03268g	LADA0E06436g	LAFA0F14994g	LAMI0F13938g	SAKL0E13244g	KLTH0B07414g
L.A1	A1LA03-053032g	3	+	51	1675	LANO0H04126g	LAME0F16402g	ZYRO0C10054g	LAWA0G08790g	LACI0H06766g	LAFE0H03290g	LADA0E06414g	LAFA0F14972g	LAMI0F13916g	SAKL0E13222g	KLTH0B07392g
L.A1	A1LA03-053010g	3	+	52	1676	LANO0H04104g	LAME0F16424g	ZYRO0C10032g	LAWA0G08812g	LACI0H06788g	LAFE0H03312g	LADA0E06392g	LAFA0F14950g	LAMI0F13894g	SAKL0E13200g	KLTH0B07370g
L.A1	A1LA03-052988g	3	+	53	1677	LANO0H04082g	LAME0F16446g	ZYRO0C10010g	LAWA0G08834g	LACI0H06810g	LAFE0H03334g	LADA0E06370g	LAFA0F14928g	LAMI0F13872g	SAKL0E13178g	KLTH0B07348g
L.A1	A1LA03-052966g	3	+	54	1678		LAME0F16490g	ZYRO0C09966g	LAWA0G08878g	LACI0H06854g	LAFE0H03378g	LADA0E06326g	LAFA0F14884g	LAMI0F13784g	SAKL0E13156g	KLTH0B07304g
L.A1	A1LA03-052944g	3	+	55	1679	LANO0H04016g	LAME0F16512g	ZYRO0C09944g	LAWA0G08900g	LACI0H06876g	LAFE0H03400g	LADA0E06304g	LAFA0F14862g	LAMI0F13762g	SAKL0E13134g	KLTH0B07282g
L.A1	A1LA03-052922g	3	+	56	1680	LANO0H03994g	LAME0F16534g	ZYRO0C09922g	LAWA0G08922g	LACI0H06898g	LAFE0H03422g	LADA0E06282g	LAFA0F14840g	LAMI0F13740g	SAKL0E13112g	KLTH0B07260g
L.A1	A1LA03-052900g	3	-	57	1681	LANO0H03972g	LAME0F16556g	ZYRO0C09900g	LAWA0G08944g	LACI0H06920g	LAFE0H03444g	LADA0E06260g	LAFA0F14818g	LAMI0F13718g	SAKL0E13090g	KLTH0B07238g
L.A1	A1LA03-052878g	3	+	58	1682	LANO0H03950g	LAME0F16578g	ZYRO0C09878g	LAWA0G08966g	LACI0H06942g	LAFE0H03466g	LADA0E06238g	LAFA0F14796g	LAMI0F13696g	SAKL0E13068g	KLTH0B07216g
L.A1	A1LA03-052856g	3	-	59	1683	LANO0H03928g	LAME0F16600g	ZYRO0C09856g	LAWA0G08977g	LACI0H06964g	LAFE0H03488g	LADA0E06216g	LAFA0F14774g	LAMI0F13674g	SAKL0E13046g	KLTH0B07194g
L.A1	A1LA03-052834g	3	-	60	1684	LANO0H03906g	LAME0F16622g	ZYRO0C09834g	LAWA0G08988g	LACI0H06986g	LAFE0H03510g	LADA0E06194g	LAFA0F14752g	LAMI0F13652g	SAKL0E13024g	KLTH0B07172g
L.A1	A1LA03-052812g	3	+	61	1685	LANO0H03884g	LAME0F16644g	ZYRO0C09812g		LACI0H07008g	LAFE0H03532g	LADA0E03290g	LAFA0F14730g	LAMI0H00254g	SAKL0E13002g	KLTH0B07150g
L.A1	A1LA03-052790g	3	-	62	1686	LANO0H03862g	LAME0F16666g	ZYRO0C09790g	LAWA0C07536g	LACI0H07030g	LAFE0H03554g	LADA0E03268g	LAFA0F14708g	LAMI0H00276g	SAKL0E12980g	KLTH0B07128g
L.A1	A1LA03-052768g	3	-	63	1687	LANO0H03840g	LAME0F16688g	ZYRO0C09768g	LAWA0C07558g	LACI0H07052g	LAFE0H03576g	LADA0E03246g	LAFA0F14686g	LAMI0H00298g	SAKL0E12958g	KLTH0B07106g
L.A1	A1LA03-052746g	3	-	64	1688	LANO0H03818g	LAME0F16710g	ZYRO0C09746g	LAWA0C07580g	LACI0H07074g	LAFE0H03598g	LADA0E02960g	LAFA0F14664g	LAMI0H00320g	SAKL0E12936g	KLTH0B07084g
L.A1	A1LA03-052702g	3	-	65	1689	LANO0H03774g	LAME0F16754g	ZYRO0C09724g	LAWA0C07624g	LACI0H07118g	LAFE0H03642g	LADA0E03004g	LAFA0F14620g	LAMI0H00364g	SAKL0E12892g	KLTH0B07040g
L.A1	A1LA03-052680g	3	+	66	1690	LANO0H03752g	LAME0F16776g	ZYRO0C09702g	LAWA0C07646g	LACI0H07140g	LAFE0H03664g	LADA0E03026g	LAFA0F14598g	LAMI0H00386g	SAKL0E12870g	KLTH0B07018g
L.A1	A1LA03-052658g	3	-	67	1691	LANO0H03730g	LAME0F16798g	ZYRO0C09680g	LAWA0C07668g	LACI0H07162g	LAFE0H03686g	LADA0E03048g	LAFA0F14576g	LAMI0H00408g	SAKL0E12848g	KLTH0B06996g
L.A1	A1LA03-052636g	3	+	68	1692	LANO0H03686g	LAME0F16842g	ZYRO0C09636g	LAWA0C07690g	LACI0H07184g	LAFE0H03708g	LADA0E03092g	LAFA0F14532g	LAMI0H00430g	SAKL0E12826g	KLTH0B06974g
L.A1	A1LA03-052614g	3	+	69	1693	LANO0H03664g	LAME0F16864g	ZYRO0C09614g	LAWA0C07712g	LACI0H07206g	LAFE0H03730g	LADA0E03136g	LAFA0F14510g	LAMI0H00452g	SAKL0E12804g	KLTH0B06952g
L.A1	A1LA03-052592g	3	-	70	1694	LANO0H03642g	LAME0F16886g	ZYRO0C09592g	LAWA0C07734g	LACI0H07228g	LAFE0H03752g	LADA0E03158g	LAFA0F14488g	LAMI0H00474g	SAKL0E12782g	KLTH0B06930g
L.A1	A1LA03-052570g	3	-	71	1695	LANO0H03620g	LAME0F16908g	ZYRO0C09570g	LAWA0C07756g	LACI0H07250g	LAFE0H03774g	LADA0E03180g	LAFA0F14466g	LAMI0H00496g	SAKL0E12760g	KLTH0B06908g
L.A1	A1LA03-052548g	3	-	72	1696	LANO0H03598g	LAME0F16930g	ZYRO0G04862g	LAWA0C07778g	LACI0H07272g	LAFE0H03796g	LADA0E03202g	LAFA0F14444g	LAMI0H00518g	SAKL0E12738g	KLTH0B06886g
L.A1	A1LA03-052504g	3	+	73	1697	LANO0H03554g	LAME0F16974g	ZYRO0G04928g		LACI0H07316g	LAFE0H03840g	LADA0E02938g	LAFA0F14400g	LAMI0H00342g	SAKL0E12650g	KLTH0B06688g
L.A1	A1LA03-052482g	3	-	74	1698	LANO0H03532g	LAME0F16996g	ZYRO0G04950g	LAWA0C07866g	LACI0H07338g	LAFE0H03862g	LADA0E02916g	LAFA0F14378g	LAMI0H00584g	SAKL0E12628g	KLTH0B06798g
L.A1	A1LA03-052460g	3	+	75	1699	LANO0H03510g	LAME0F17018g	ZYRO0G04972g		LACI0H07360g	LAFE0H03884g	LADA0E02894g	LAFA0F14356g	LAMI0H00606g	SAKL0E12606g	KLTH0B06776g
L.A1	A1LA03-052438g	3	-	76	1700	LANO0H03488g		ZYRO0G04994g	LAWA0C07910g	LACI0H07382g	LAFE0H03906g	LADA0E02872g		LAMI0H00628g	SAKL0E12584g	KLTH0B06754g
L.A1	A1LA03-052394g	3	-	77	1701	LANO0H03422g	LAME0F17084g	ZYRO0G05038g	LAWA0C07976g	LACI0H07448g	LAFE0H03950g	LADA0E02806g	LAFA0F10726g	LAMI0H00672g	SAKL0E12540g	KLTH0B06622g
L.A1	A1LA03-052350g	3	+	78	1702	LANO0H03378g	LAME0F17128g	ZYRO0G05082g	LAWA0C08020g	LACI0H07492g	LAFE0H03994g	LADA0E02762g	LAFA0F10770g	LAMI0B00474g	SAKL0E12496g	KLTH0B06578g
L.A1	A1LA03-052306g	3	-	79	1703	LANO0H03334g	LAME0F17172g	ZYRO0G05126g	LAWA0C08064g	LACI0H07536g	LAFE0H04038g	LADA0E02718g	LAFA0F10814g	LAMI0B00518g	SAKL0E12452g	KLTH0B06534g
L.A1	A1LA03-052284g	3	-	80	1704	LANO0H03312g	LAME0F17194g	ZYRO0G05148g	LAWA0C08086g	LACI0H07558g	LAFE0H04060g	LADA0E02696g	LAFA0F10836g	LAMI0B00562g	SAKL0E12430g	KLTH0B06512g
L.A1	A1LA03-052240g	3	-	81	1705	LANO0H03268g	LAME0F17238g	ZYRO0G05170g	LAWA0C08130g	LACI0H07602g	LAFE0H04104g	LADA0E02652g	LAFA0F10880g	LAMI0B00606g	SAKL0E12386g	KLTH0B06468g
L.A1	A1LA03-052218g	3	+	82	1706	LANO0H03246g	LAME0F17260g	ZYRO0G05192g	LAWA0C08152g	LACI0H07624g	LAFE0H04126g	LADA0E02630g	LAFA0F10902g	LAMI0B00628g	SAKL0E12364g	KLTH0B06446g
L.A1	A1LA03-052196g	3	+	83	1707	LANO0H03224g	LAME0F17282g	ZYRO0G05214g	LAWA0C08174g	LACI0H07646g	LAFE0H04148g	LADA0E02608g	LAFA0F10924g	LAMI0B00650g	SAKL0E12342g	KLTH0B06424g
L.A1	A1LA03-052174g	3	-	84	1708	LANO0H03202g	LAME0F17304g	ZYRO0G05236g	LAWA0C08196g	LACI0H07668g	LAFE0H04170g	LADA0E02586g	LAFA0F10946g	LAMI0B00672g	SAKL0E12320g	KLTH0B06358g
L.A1	A1LA03-052152g	3	+	85	1709	LANO0H03180g	LAME0F17326g	ZYRO0G05258g	LAWA0C08218g	LACI0H07690g	LAFE0H04192g	LADA0E02564g	LAFA0F10968g	LAMI0B00694g	SAKL0E12298g	KLTH0B06380g
L.A1	A1LA03-052130g	3	+	86	1710	LANO0H03136g	LAME0F17370g	ZYRO0G05280g	LAWA0C08262g	LACI0H07712g	LAFE0H04214g	LADA0E02520g	LAFA0F11012g	LAMI0B00738g	SAKL0E12254g	KLTH0B06336g
L.A1	A1LA03-052108g	3	+	87	1711	LANO0H03114g	LAME0F17392g	ZYRO0G05302g	LAWA0C08350g	LACI0H07734g	LAFE0H04236g	LADA0E02498g	LAFA0F11034g	LAMI0B00760g	SAKL0E12232g	KLTH0B06314g
L.A1	A1LA03-052086g	3	-	88	1712	LANO0H03092g	LAME0F17414g	ZYRO0G05324g	LAWA0C08306g	LACI0H07756g	LAFE0H04258g	LADA0E02476g	LAFA0F11056g	LAMI0B00782g	SAKL0E12210g	KLTH0B06292g
L.A1	A1LA03-052064g	3	-	89	1713	LANO0H03070g	LAME0F17436g	ZYRO0G05346g	LAWA0C08328g	LACI0H07778g	LAFE0H04280g		LAFA0F11078g	LAMI0B00804g	SAKL0E12188g	KLTH0B06270g
L.A1	A1LA03-051998g	3	-	90	1714	LANO0E11738g	LAME0H06502g	ZYRO0G05390g	LAWA0C08394g	LACI0H07866g	LAFE0H04346g	LADA0D07448g	LAFA0E09274g	LAMI0B00870g	SAKL0E12122g	KLTH0B06226g
L.A1	A1LA03-051976g	3	+	91	1715	LANO0E11760g	LAME0H06480g	ZYRO0G05412g	LAWA0C08416g	LACI0H07888g	LAFE0H04390g	LADA0D07470g	LAFA0E09252g	LAMI0B00892g	SAKL0E12100g	KLTH0B06204g
L.A1	A1LA03-051932g	3	-	92	1716	LANO0E11804g	LAME0H06436g	ZYRO0G05434g	LAWA0C08438g	LACI0G10660g	LAFE0G12530g	LADA0D07492g	LAFA0E09208g	LAMI0B00936g	SAKL0E12056g	KLTH0B06160g
L.A1	A1LA03-051910g	3	-	93	1717	LANO0E11826g	LAME0H06414g	ZYRO0G05456g	LAWA0C08460g	LACI0G10638g	LAFE0G12508g	LADA0D07536g	LAFA0E09186g	LAMI0B00958g	SAKL0E12012g	KLTH0B06138g
L.A1	A1LA03-051888g	3	+	94	1718	LANO0E11848g	LAME0H06392g	ZYRO0G05478g	LAWA0C08482g	LACI0G10616g	LAFE0G12486g	LADA0D07558g	LAFA0E09164g	LAMI0B00980g	SAKL0E11990g	KLTH0B06116g
L.A1	A1LA03-051866g	3	-	95	1719	LANO0E11870g	LAME0H06370g	ZYRO0G05500g	LAWA0C08504g	LACI0G10594g	LAFE0G12464g	LADA0D07580g	LAFA0E09142g	LAMI0B01002g	SAKL0E11968g	KLTH0B06094g
L.A1	A1LA03-051844g	3	+	96	1720	LANO0E11892g	LAME0H06348g	ZYRO0G05522g	LAWA0C08526g	LACI0G10572g	LAFE0G12442g	LADA0D07602g	LAFA0E09120g	LAMI0B01024g	SAKL0E11946g	KLTH0B06072g
L.A1	A1LA03-051822g	3	-	97	1721	LANO0E11914g	LAME0H06326g	ZYRO0G05544g	LAWA0C08548g	LACI0G10550g	LAFE0G12420g	LADA0D07624g	LAFA0E09098g	LAMI0B01046g	SAKL0E11924g	KLTH0B06050g
L.A1	A1LA03-051800g	3	+	98	1722	LANO0E11936g	LAME0H06304g	ZYRO0G05566g		LACI0G10528g	LAFE0G12398g	LADA0D07646g	LAFA0E09076g	LAMI0B01068g	SAKL0E11902g	KLTH0B06028g
L.A1	A1LA03-051778g	3	+	99	1723	LANO0E11958g	LAME0H06282g	ZYRO0G05610g	LAWA0C08592g	LACI0G10506g	LAFE0G12376g	LADA0D07668g	LAFA0E09054g	LAMI0B01090g	SAKL0E11880g	KLTH0B06006g
L.A1	A1LA03-051756g	3	+	100	1724	LANO0E11980g	LAME0H06260g	ZYRO0G05632g	LAWA0C08614g	LACI0G10484g	LAFE0G12354g	LADA0D07690g	LAFA0E09032g	LAMI0B01112g	SAKL0E11858g	KLTH0B05984g
L.A1	A1LA03-051734g	3	+	101	1725	LANO0E12002g	LAME0H06238g	ZYRO0G05654g	LAWA0C08636g	LACI0G10440g	LAFE0G12310g	LADA0D07712g	LAFA0E09010g	LAMI0B01134g	SAKL0E11836g	KLTH0B05962g
L.A1	A1LA03-051712g	3	+	102	1726	LANO0E12024g	LAME0H06216g	ZYRO0G05676g	LAWA0C08658g	LACI0G10418g	LAFE0G12288g	LADA0D07734g	LAFA0E08988g		SAKL0E11814g	KLTH0B05940g
L.A1	A1LA03-051690g	3	-	103	1727	LANO0E12046g	LAME0H06194g	ZYRO0G05698g	LAWA0C08680g	LACI0G10396g	LAFE0G12266g	LADA0D07756g	LAFA0E08966g	LAMI0B01156g	SAKL0E11792g	KLTH0B05918g
L.A1	A1LA03-051668g	3	-	104	1728	LANO0E12068g	LAME0H06172g	ZYRO0G05720g	LAWA0C08702g	LACI0G10374g	LAFE0G12244g	LADA0D07778g	LAFA0E08944g	LAMI0B01178g	SAKL0E11770g	KLTH0B05896g
L.A1	A1LA03-051646g	3	+	105	1729	LANO0E12090g	LAME0H06150g	ZYRO0G05742g	LAWA0C08724g	LACI0G10352g	LAFE0G12222g	LADA0D07800g	LAFA0E08922g	LAMI0B01200g	SAKL0E11748g	KLTH0B05874g
L.A1	A1LA03-051624g	3	+	106	1730	LANO0E12112g	LAME0H06128g	ZYRO0G05764g	LAWA0C08746g	LACI0G10330g	LAFE0G12200g	LADA0D08372g	LAFA0E08900g	LAMI0B01222g	SAKL0E11704g	KLTH0B05852g
L.A1	A1LA03-051602g	3	+	107	1731	LANO0E12134g	LAME0H06106g	ZYRO0G05786g	LAWA0C08768g	LACI0G10308g	LAFE0G12178g	LADA0D08350g	LAFA0E08878g	LAMI0B01244g	SAKL0E11682g	KLTH0B05830g
L.A1	A1LA03-051558g	3	-	108	1732	LANO0E12156g	LAME0H06084g	ZYRO0G05808g	LAWA0C08790g	LACI0G10264g	LAFE0G12134g	LADA0D08328g	LAFA0E08856g	LAMI0B01266g	SAKL0E11638g	KLTH0B05808g
L.A1	A1LA03-051536g	3	-	109	1733	LANO0E12178g	LAME0H06062g	ZYRO0G05830g	LAWA0C08812g	LACI0G10242g	LAFE0G12112g	LADA0D08306g	LAFA0E08834g	LAMI0B01288g	SAKL0E11616g	KLTH0B05786g
L.A1	A1LA03-051514g	3	+	110	1734	LANO0E12200g	LAME0H06040g	ZYRO0G05852g	LAWA0C08834g	LACI0G10220g	LAFE0G12090g	LADA0D08284g	LAFA0E08812g	LAMI0B01464g	SAKL0E11594g	KLTH0B05764g
L.A1	A1LA03-051492g	3	-	111	1735	LANO0E12222g	LAME0H06018g	ZYRO0G05874g	LAWA0C08856g	LACI0G10198g	LAFE0G12068g	LADA0D08262g	LAFA0E08790g	LAMI0B01332g	SAKL0E11550g	KLTH0B05742g
L.A1	A1LA03-051470g	3	+	112	1736	LANO0E12244g	LAME0H05996g	ZYRO0G05896g	LAWA0C08878g	LACI0G10176g	LAFE0G12046g	LADA0D08240g	LAFA0E08768g	LAMI0B01354g	SAKL0E11528g	KLTH0B05720g
L.A1	A1LA03-051448g	3	-	113	1737	LANO0E12266g	LAME0H05974g	ZYRO0G05918g	LAWA0C08900g	LACI0G10154g	LAFE0G12024g	LADA0D08218g	LAFA0E08746g	LAMI0B01376g	SAKL0E11506g	KLTH0B05698g
L.A1	A1LA03-051426g	3	+	114	1738	LANO0E12288g	LAME0H05952g	ZYRO0G05940g	LAWA0C08922g	LACI0G10132g	LAFE0G12002g	LADA0D08196g	LAFA0E08724g	LAMI0B01398g	SAKL0E11484g	KLTH0B05676g
L.A1	A1LA03-051404g	3	-	115	1739	LANO0E12310g	LAME0H05930g	ZYRO0G05962g	LAWA0C08944g	LACI0G10110g	LAFE0G11980g	LADA0D08174g	LAFA0E08702g	LAMI0B01420g	SAKL0E11462g	KLTH0B05654g
L.A1	A1LA03-051382g	3	+	116	1740			ZYRO0G05984g		LACI0G10000g	LAFE0G11870g	LADA0D08130g	LAFA0E08658g	LAMI0B01508g	SAKL0E11418g
L.A1	A1LA03-051338g	3	-	117	1741	LANO0E12398g	LAME0H05842g	ZYRO0G06160g	LAWA0C09054g	LACI0H20582g	LAFE0F05644g	LADA0D08086g	LAFA0E08614g	LAMI0B01618g	SAKL0E11330g	KLTH0B05544g
L.A1	A1LA03-051316g	3	+	118	1742	LANO0E12420g	LAME0H05820g	ZYRO0G06182g	LAWA0C09076g	LACI0H20560g	LAFE0F05666g	LADA0D08064g	LAFA0E08592g	LAMI0B01640g	SAKL0E11308g	KLTH0B05522g
L.A1	A1LA03-051294g	3	+	119	1743	LANO0E12442g	LAME0H05798g	ZYRO0G06204g	LAWA0C09098g	LACI0H20538g	LAFE0F05688g	LADA0D08042g	LAFA0E08570g	LAMI0B01662g	SAKL0E11286g	KLTH0B05500g
L.A1	A1LA03-051272g	3	-	120	1744	LANO0E12464g	LAME0H05776g	ZYRO0G06226g	LAWA0C09120g	LACI0H20516g	LAFE0F05710g	LADA0D08020g	LAFA0E08548g	LAMI0B01684g	SAKL0E11264g	KLTH0B05478g
L.A1	A1LA03-051250g	3	-	121	1745	LANO0E12486g	LAME0H05754g	ZYRO0G06248g		LACI0H20494g	LAFE0F05732g	LADA0D07998g	LAFA0E08526g	LAMI0B01706g	SAKL0E11242g	KLTH0B05456g
L.A1	A1LA03-051228g	3	+	122	1746	LANO0E12508g	LAME0H05732g	ZYRO0G06270g		LACI0H20472g	LAFE0F05754g	LADA0D07976g	LAFA0E08504g	LAMI0B01728g	SAKL0E11220g	KLTH0B05434g
L.A1	A1LA03-051206g	3	+	123	1747	LANO0E12530g	LAME0H05710g	ZYRO0G06292g	LAWA0C09164g	LACI0H20450g			LAFA0E08482g	LAMI0B01750g	SAKL0E11198g	KLTH0B05412g
L.A1	A1LA03-051184g	3	-	124	1748	LANO0E12552g	LAME0H05688g	ZYRO0G06314g		LACI0H20428g	LAFE0F05776g	LADA0D07888g	LAFA0E08460g	LAMI0B01772g	SAKL0E11176g	KLTH0B05390g
L.A1	A1LA03-051162g	3	+	125	1749	LANO0E12574g	LAME0H05666g	ZYRO0G06336g	LAWA0C09186g	LACI0H20406g	LAFE0F05798g	LADA0D07910g	LAFA0E08438g	LAMI0B01794g	SAKL0E11154g	KLTH0B05368g
L.A1	A1LA03-051140g	3	+	126	1750	LANO0E12596g	LAME0H05644g	ZYRO0G06358g	LAWA0C09208g	LACI0H20384g	LAFE0F05820g	LADA0D07888g	LAFA0E08416g	LAMI0B01816g	SAKL0E11132g	KLTH0B05346g
L.A1	A1LA03-051118g	3	-	127	1751		LAME0H05622g	ZYRO0G06380g		LACI0H20362g	LAFE0F05842g	LADA0D07866g	LAFA0E08394g	LAMI0B01838g	SAKL0E11110g
L.A1	A1LA03-051096g	3	+	128	1752	LANO0E12618g	LAME0H05600g	ZYRO0G06402g	LAWA0C09230g	LACI0H20340g	LAFE0F05864g	LADA0D07844g	LAFA0E08372g	LAMI0B01860g	SAKL0E11088g	KLTH0B05324g
L.A1	A1LA03-051074g	3	-	129	1753	LANO0E12640g	LAME0H05578g	ZYRO0G06424g	LAWA0C09252g	LACI0H20318g	LAFE0F05886g	LADA0D07822g	LAFA0E08350g	LAMI0B01882g	SAKL0E11066g	KLTH0B05302g
L.A1	A1LA03-051052g	3	-	130	1754	LANO0E12662g	LAME0H05556g	ZYRO0G06446g	LAWA0C09274g	LACI0H20296g	LAFE0F05908g	LADA0D08394g	LAFA0E08328g	LAMI0B01904g	SAKL0E11044g	KLTH0B05280g
L.A1	A1LA03-051030g	3	+	131	1755	LANO0E12684g	LAME0H05534g	ZYRO0G06468g	LAWA0C09296g	LACI0H20274g	LAFE0F05930g	LADA0D08416g	LAFA0E08306g	LAMI0B01926g	SAKL0E11022g	KLTH0B05258g
L.A1	A1LA03-050986g	3	-	132	1756	LANO0E12728g	LAME0H05490g	ZYRO0G06490g	LAWA0C09340g	LACI0H20230g	LAFE0F05974g	LADA0D08460g	LAFA0E08262g	LAMI0B01970g	SAKL0E10978g	KLTH0B05214g
L.A1	A1LA03-050964g	3	-	133	1757	LANO0E12750g	LAME0H05468g	ZYRO0G06512g	LAWA0C09384g	LACI0H20208g	LAFE0F05996g	LADA0D08482g	LAFA0E08240g	LAMI0B01992g	SAKL0E10956g	KLTH0B05093g
L.A1	A1LA03-050942g	3	-	134	1758	LANO0E12772g	LAME0H05446g	ZYRO0G06534g	LAWA0C09406g	LACI0H20186g	LAFE0F06018g	LADA0D08504g	LAFA0E08218g	LAMI0B02014g	SAKL0E10934g	KLTH0B05148g
L.A1	A1LA03-050920g	3	+	135	1759	LANO0E12794g	LAME0H05424g	ZYRO0B16346g	LAWA0C09428g	LACI0H20164g	LAFE0F06040g	LADA0D08526g	LAFA0E08196g	LAMI0B02036g	SAKL0E10912g	KLTH0B05126g
L.A1	A1LA03-050898g	3	-	136	1760	LANO0E12816g	LAME0H05402g	ZYRO0B16324g	LAWA0C09450g	LACI0H20142g	LAFE0F06062g	LADA0D08548g	LAFA0E08174g	LAMI0B02058g	SAKL0E10890g	KLTH0B05104g
L.A1	A1LA03-050876g	3	+	137	1761	LANO0E12838g	LAME0H05380g	ZYRO0B16302g	LAWA0C09472g	LACI0H20120g	LAFE0F06084g	LADA0D08570g	LAFA0E08152g	LAMI0B02080g	SAKL0E10868g	KLTH0B05082g
L.A1	A1LA03-050854g	3	+	138	1762	LANO0E11496g	LAME0H06788g	ZYRO0B16280g	LAWA0D06612g	LACI0H20098g	LAFE0F06106g	LADA0D07206g	LAFA0E09516g	LAMI0B02102g	SAKL0E10846g	KLTH0E09856g
L.A1	A1LA03-050832g	3	+	139	1763	LANO0E11518g	LAME0H06766g	ZYRO0B16258g	LAWA0D06590g	LACI0H20076g	LAFE0F06128g	LADA0D07228g	LAFA0E09494g	LAMI0B02124g	SAKL0E10824g	KLTH0E09834g
L.A1	A1LA03-050810g	3	-	140	1764	LANO0E11540g	LAME0H06744g	ZYRO0B16236g	LAWA0D06568g	LACI0H20054g	LAFE0F06150g	LADA0D07250g	LAFA0E09472g	LAMI0B02146g	SAKL0E10802g	KLTH0E09812g
L.A1	A1LA03-050788g	3	-	141	1765	LANO0E11562g	LAME0H06722g	ZYRO0B16214g	LAWA0D06546g	LACI0H20032g	LAFE0F06172g	LADA0D07272g	LAFA0E09450g	LAMI0B02168g	SAKL0E10780g	KLTH0E09790g
L.A1	A1LA03-050766g	3	+	142	1766	LANO0E11584g	LAME0H06700g	ZYRO0B16192g	LAWA0D06524g	LACI0H20010g	LAFE0F06194g	LADA0D07294g	LAFA0E09384g	LAMI0B02190g	SAKL0E10758g	KLTH0E09768g
L.A1	A1LA03-050744g	3	-	143	1767	LANO0E11606g	LAME0H06678g	ZYRO0B16170g	LAWA0D06502g	LACI0H19988g	LAFE0F06216g	LADA0D07316g	LAFA0E09406g	LAMI0B02212g	SAKL0E10736g	KLTH0E09746g
L.A1	A1LA03-050722g	3	-	144	1768	LANO0E11628g	LAME0H06656g	ZYRO0B16148g	LAWA0D06480g	LACI0H19966g	LAFE0F06238g	LADA0D07338g	LAFA0E09384g	LAMI0B02234g	SAKL0E10714g	KLTH0E09724g
L.A1	A1LA03-050700g	3	+	145	1769	LANO0H13872g	LAME0H13102g	ZYRO0B09878g	LAWA0E09054g	LACI0H19944g	LAFE0F06260g	LADA0C08680g	LAFA0C06238g	LAMI0B02256g	SAKL0E10692g	KLTH0D09350g
L.A1	A1LA03-050678g	3	+	146	1770	LANO0H13850g	LAME0H13080g	ZYRO0B09856g	LAWA0E09032g	LACI0H19922g	LAFE0F06282g	LADA0C08702g	LAFA0C06260g	LAMI0B02278g	SAKL0E10670g	KLTH0D09328g
L.A1	A1LA03-050656g	3	-	147	1771	LANO0H13828g	LAME0H13058g	ZYRO0B09834g	LAWA0E09010g	LACI0H19900g	LAFE0F06304g	LADA0C08724g	LAFA0C06282g	LAMI0B02300g	SAKL0E10648g	KLTH0D09306g
L.A1	A1LA03-050634g	3	-	148	1772	LANO0H13806g	LAME0H13036g	ZYRO0B09812g	LAWA0E08988g	LACI0H19878g	LAFE0F06326g	LADA0C08746g	LAFA0C06304g	LAMI0B02322g	SAKL0E10626g	KLTH0D09284g
L.A1	A1LA03-050612g	3	-	149	1773	LANO0H13784g	LAME0H13014g	ZYRO0B09790g	LAWA0E08966g	LACI0H19856g	LAFE0F06348g	LADA0C08768g	LAFA0C06326g	LAMI0B02344g	SAKL0E10604g	KLTH0D09262g
L.A1	A1LA03-050590g	3	-	150	1774	LANO0H13762g	LAME0H12992g	ZYRO0B09768g	LAWA0E08944g	LACI0H19834g	LAFE0F06370g	LADA0C08790g	LAFA0C06348g	LAMI0B02366g	SAKL0E10582g	KLTH0D09240g
L.A1	A1LA03-050568g	3	-	151	1775	LANO0H13740g	LAME0H12970g	ZYRO0B09746g	LAWA0E08922g	LACI0H19812g	LAFE0F06392g	LADA0C08812g	LAFA0C06370g	LAMI0B02388g	SAKL0E10560g	KLTH0D09218g
L.A1	A1LA03-050546g	3	+	152	1776	LANO0H13718g	LAME0H12948g	ZYRO0B09724g	LAWA0E08900g	LACI0H19790g	LAFE0F06414g	LADA0C08834g	LAFA0C06392g	LAMI0B02410g	SAKL0E10538g	KLTH0D09196g
L.A1	A1LA03-050502g	3	-	153	1777	LANO0H13696g	LAME0H12926g	ZYRO0B09702g	LAWA0E08878g	LACI0H19746g	LAFE0F06458g	LADA0C08856g	LAFA0C06414g	LAMI0D00606g	SAKL0E10494g	KLTH0D09174g
L.A1	A1LA03-050480g	3	-	154	1778	LANO0H13674g	LAME0H12904g	ZYRO0B09680g	LAWA0E08856g	LACI0H19724g	LAFE0F06480g	LADA0C08878g	LAFA0C06436g	LAMI0D00628g	SAKL0E10472g	KLTH0D09152g
L.A1	A1LA03-050458g	3	-	155	1779	LANO0H13652g		ZYRO0B09570g	LAWA0E08834g	LACI0H19702g	LAFE0F06502g	LADA0C08900g	LAFA0C06458g		SAKL0E10450g	KLTH0D09130g
L.A1	A1LA03-050436g	3	+	156	1780	LANO0H13608g	LAME0H12860g	ZYRO0B09636g	LAWA0E08812g	LACI0H19680g	LAFE0F06524g	LADA0C08922g	LAFA0C06480g	LAMI0D00672g	SAKL0E10428g	KLTH0D09108g
L.A1	A1LA03-050414g	3	-	157	1781	LANO0H13586g	LAME0H12838g	ZYRO0B09614g	LAWA0E08790g	LACI0H19658g	LAFE0F06546g	LADA0C08944g	LAFA0C06502g	LAMI0D00694g	SAKL0E10406g	KLTH0D09086g
L.A1	A1LA03-050392g	3	+	158	1782	LANO0H13564g	LAME0H12816g	ZYRO0B09570g	LAWA0E08768g	LACI0H19636g	LAFE0F06568g	LADA0C08966g	LAFA0C06524g	LAMI0D00716g	SAKL0E10384g	KLTH0D09064g
L.A1	A1LA03-050370g	3	+	159	1783	LANO0H13520g	LAME0H12772g	ZYRO0B09548g	LAWA0E08746g	LACI0H19614g	LAFE0F06590g	LADA0C09010g	LAFA0C06568g	LAMI0D00738g	SAKL0E10362g	KLTH0D09042g
L.A1	A1LA03-050348g	3	+	160	1784	LANO0H13498g	LAME0H12750g	ZYRO0B09526g	LAWA0E08724g	LACI0H19592g	LAFE0F06612g	LADA0C09032g	LAFA0C06590g	LAMI0D00760g	SAKL0E10340g	KLTH0D09020g
L.A1	A1LA03-050326g	3	-	161	1785	LANO0H13476g	LAME0H12728g	ZYRO0B09504g	LAWA0E08702g	LACI0H19570g	LAFE0F06634g	LADA0C09054g	LAFA0C06612g	LAMI0D00782g	SAKL0E10318g	KLTH0D08998g
L.A1	A1LA03-050304g	3	-	162	1786	LANO0H13454g	LAME0H12706g	ZYRO0B09482g	LAWA0E08680g	LACI0H19548g	LAFE0F06656g	LADA0C09076g	LAFA0C06656g	LAMI0D00804g	SAKL0E10296g	KLTH0D08976g
L.A1	A1LA03-050282g	3	+	163	1787	LANO0H13432g	LAME0H12684g	ZYRO0B09460g	LAWA0E08658g	LACI0H19526g	LAFE0F06678g	LADA0C09098g	LAFA0C06678g	LAMI0D00826g	SAKL0E10274g	KLTH0D08954g
L.A1	A1LA03-050260g	3	-	164	1788	LANO0H13410g	LAME0H12662g	ZYRO0B09438g	LAWA0E08636g	LACI0H19504g	LAFE0F06700g	LADA0C09120g	LAFA0C06700g	LAMI0D00848g	SAKL0E10252g	KLTH0D08932g
L.A1	A1LA03-050238g	3	-	165	1789	LANO0H13388g	LAME0H12640g	ZYRO0B09416g	LAWA0E08614g	LACI0H19482g	LAFE0F06722g	LADA0C09142g	LAFA0C06722g	LAMI0D00870g	SAKL0E10230g	KLTH0D08910g
L.A1	A1LA03-050216g	3	+	166	1790	LANO0H08922g	LAME0D07140g	ZYRO0E01958g	LAWA0G00870g	LACI0F18558g	LAFE0E13322g	LADA0E08658g	LAFA0F19614g	LAMI0F09384g	SAKL0E10186g	KLTH0G07920g
L.A1	A1LA03-050194g	3	-	167	1791	LANO0H08900g	LAME0D07118g	ZYRO0E01980g	LAWA0G00892g	LACI0F18536g	LAFE0E13300g	LADA0E08680g	LAFA0F19636g	LAMI0F09406g	SAKL0E10164g	KLTH0G07942g
L.A1	A1LA03-050172g	3	+	168	1792	LANO0H08878g	LAME0D07096g	ZYRO0E02002g	LAWA0G00914g	LACI0F18514g	LAFE0E13278g	LADA0E08702g	LAFA0F19658g	LAMI0F09428g	SAKL0E10142g	KLTH0G07964g
L.A1	A1LA03-050150g	3	+	169	1793	LANO0H13542g	LAME0D07052g	ZYRO0E02024g	LAWA0G00958g	LACI0F18492g	LAFE0E13256g	LADA0E08746g	LAFA0F19702g	LAMI0F09450g	SAKL0E10120g	KLTH0G08008g
L.A1	A1LA03-050128g	3	-	170	1794	LANO0H08812g	LAME0D07030g	ZYRO0E02046g	LAWA0G00980g	LACI0F18470g	LAFE0E13234g	LADA0E08768g	LAFA0F19724g	LAMI0F09472g	SAKL0E10098g	KLTH0G08030g
L.A1	A1LA03-050106g	3	+	171	1795	LANO0H08768g	LAME0D07008g	ZYRO0E02068g	LAWA0G01002g	LACI0F18448g	LAFE0E13212g	LADA0E08790g	LAFA0F19746g	LAMI0F09494g	SAKL0E10076g	KLTH0G08052g
L.A1	A1LA03-050084g	3	-	172	1796	LANO0H08746g	LAME0D06986g	ZYRO0E02090g	LAWA0G01024g	LACI0F18426g	LAFE0E13190g	LADA0E08812g	LAFA0F19768g	LAMI0F09516g	SAKL0E10054g	KLTH0G08074g
L.A1	A1LA03-050062g	3	+	173	1797	LANO0H08724g	LAME0D06964g	ZYRO0E02134g	LAWA0G01046g	LACI0F18404g	LAFE0E13168g	LADA0E08834g	LAFA0F19790g	LAMI0F09538g	SAKL0E10032g	KLTH0G08096g
L.A1	A1LA03-050040g	3	-	174	1798	LANO0H08702g	LAME0D06942g	ZYRO0E02156g	LAWA0G01068g	LACI0F18382g	LAFE0E13146g	LADA0E08856g	LAFA0F19812g	LAMI0F09560g	SAKL0E10010g	KLTH0G08118g
L.A1	A1LA03-050018g	3	+	175	1799	LANO0H08680g	LAME0D06920g	ZYRO0C15620g	LAWA0G01090g	LACI0F18360g	LAFE0E13124g	LADA0E08878g	LAFA0F19834g	LAMI0F09582g	SAKL0E09988g	KLTH0G08140g
L.A1	A1LA03-049996g	3	-	176	1800	LANO0H08658g	LAME0D06898g	ZYRO0C15598g	LAWA0G01112g	LACI0F18338g	LAFE0E13102g	LADA0E08900g	LAFA0F19856g	LAMI0F09604g	SAKL0E09966g	KLTH0G08162g
L.A1	A1LA03-049974g	3	+	177	1801	LANO0H08636g	LAME0D06876g	ZYRO0C15576g	LAWA0G01134g	LACI0F18316g	LAFE0E13080g	LADA0E08922g	LAFA0F19878g	LAMI0F09626g	SAKL0E09944g	KLTH0G08184g
L.A1	A1LA03-049952g	3	+	178	1802	LANO0H08614g	LAME0D06854g	ZYRO0C15554g	LAWA0G01156g	LACI0F18294g	LAFE0E13058g	LADA0E08944g	LAFA0F19900g	LAMI0F09648g	SAKL0E09922g	KLTH0G08206g
L.A1	A1LA03-049930g	3	+	179	1803			ZYRO0C15532g		LACI0F18272g	LAFE0E13036g				SAKL0E09900g
L.A1	A1LA03-049908g	3	-	180	1804	LANO0H08592g	LAME0D06832g	ZYRO0C15510g	LAWA0G01178g	LACI0F18250g	LAFE0E13014g	LADA0E08966g	LAFA0F19922g	LAMI0F09670g	SAKL0E09878g	KLTH0G08228g
L.A1	A1LA03-049886g	3	+	181	1805	LANO0H08570g	LAME0D06810g	ZYRO0C15488g		LACI0F18228g	LAFE0E12992g	LADA0E08988g	LAFA0F19944g	LAMI0F09692g	SAKL0E09856g	KLTH0G08250g
L.A1	A1LA03-049864g	3	+	182	1806	LANO0H08548g	LAME0D06788g	ZYRO0C15466g		LACI0F18206g	LAFE0E12970g	LADA0E09010g	LAFA0F19966g	LAMI0F09714g	SAKL0E09834g	KLTH0G08294g
L.A1	A1LA03-049842g	3	+	183	1807	LANO0H08526g	LAME0D06766g	ZYRO0C15422g	LAWA0G01222g	LACI0F18162g	LAFE0E12948g	LADA0E09032g	LAFA0F19988g	LAMI0F09758g	SAKL0E09768g	KLTH0G08338g
L.A1	A1LA03-049820g	3	+	184	1808	LANO0H08504g	LAME0D06744g	ZYRO0C15400g	LAWA0G01244g	LACI0F18140g	LAFE0E12926g	LADA0E09054g	LAFA0F20010g	LAMI0F09780g	SAKL0E09746g	KLTH0G08360g
L.A1	A1LA03-049798g	3	+	185	1809	LANO0H08482g	LAME0D06722g	ZYRO0C15378g	LAWA0G01266g	LACI0F18074g	LAFE0E12860g	LADA0E09076g	LAFA0F20032g	LAMI0F09802g	SAKL0E09724g	KLTH0G08382g
L.A1	A1LA03-049776g	3	-	186	1810	LANO0H08460g	LAME0D06700g	ZYRO0C15356g	LAWA0G01288g	LACI0F18096g	LAFE0E12882g	LADA0E09098g	LAFA0F20054g	LAMI0F09824g	SAKL0E09702g	KLTH0G08404g
L.A1	A1LA03-049754g	3	+	187	1811	LANO0H08438g	LAME0D06678g	ZYRO0C15334g	LAWA0G01310g	LACI0F18074g	LAFE0E12860g	LADA0E09120g	LAFA0F20076g	LAMI0F09846g	SAKL0E09680g	KLTH0G08426g
L.A1	A1LA03-049710g	3	+	188	1812	LANO0H08416g	LAME0D06656g	ZYRO0C15312g	LAWA0G01332g	LACI0F17942g	LAFE0E12750g	LADA0E09142g	LAFA0F20098g	LAMI0F09956g	SAKL0E09614g	KLTH0G08470g
L.A1	A1LA03-049688g	3	-	189	1813	LANO0H08394g	LAME0D06634g	ZYRO0C15290g	LAWA0G01354g	LACI0F17964g	LAFE0E12772g	LADA0E09164g	LAFA0F20120g	LAMI0F09934g	SAKL0E09592g	KLTH0G08492g
L.A1	A1LA03-049666g	3	+	190	1814	LANO0H08372g	LAME0D06612g	ZYRO0C15268g	LAWA0G01376g	LACI0F17986g	LAFE0E12794g	LADA0E09186g	LAFA0F20142g	LAMI0F09912g	SAKL0E09570g	KLTH0G08514g
L.A1	A1LA03-049644g	3	-	191	1815	LANO0H08350g	LAME0D06590g	ZYRO0C15246g	LAWA0G01398g	LACI0F18008g	LAFE0E12816g	LADA0E09208g	LAFA0F20164g	LAMI0F09890g	SAKL0E09548g	KLTH0G08536g
L.A1	A1LA03-049622g	3	+	192	1816	LANO0H08328g	LAME0D06568g	ZYRO0C15224g	LAWA0G01420g	LACI0F17898g	LAFE0E12706g	LADA0E09230g	LAFA0F20186g	LAMI0C10506g	SAKL0E09482g	KLTH0G08580g
L.A1	A1LA03-049600g	3	-	193	1817	LANO0H08306g	LAME0D06546g	ZYRO0C15202g	LAWA0G01442g	LACI0F17876g	LAFE0E12684g	LADA0E09252g	LAFA0F20208g	LAMI0C10484g	SAKL0E09460g	KLTH0G08602g
L.A1	A1LA03-049578g	3	+	194	1818	LANO0H08284g	LAME0D06524g	ZYRO0C15180g	LAWA0G01464g	LACI0F17854g	LAFE0E12662g	LADA0E09274g	LAFA0F20230g	LAMI0C10462g	SAKL0E09438g	KLTH0G08624g
L.A1	A1LA03-049556g	3	-	195	1819	LANO0H08262g	LAME0D06502g	ZYRO0C15158g	LAWA0G01486g	LACI0F17832g	LAFE0E12640g	LADA0E09296g	LAFA0F20252g	LAMI0C10440g	SAKL0E09416g	KLTH0G08646g
L.A1	A1LA03-049468g	3	-	196	1820	LANO0H08240g	LAME0D06480g	ZYRO0C15136g	LAWA0G01508g	LACI0F17810g	LAFE0E12618g	LADA0E09318g	LAFA0F20274g	LAMI0C10418g	SAKL0E09328g	KLTH0G08668g
L.A1	A1LA03-049490g	3	-	197	1821	LANO0H08218g	LAME0D06458g	ZYRO0C15114g	LAWA0G01530g	LACI0F17788g	LAFE0E12596g	LADA0E09340g	LAFA0F20296g	LAMI0C10396g	SAKL0E09350g	KLTH0G08734g
L.A1	A1LA03-049512g	3	+	198	1822	LANO0H08152g	LAME0D06392g	ZYRO0C15092g	LAWA0G01596g	LACI0F17766g	LAFE0E12552g	LADA0E09406g	LAFA0F20384g	LAMI0C10374g	SAKL0E09372g	KLTH0G08800g
L.A1	A1LA03-049534g	3	-	199	1823	LANO0H08174g	LAME0D06414g	ZYRO0C15070g	LAWA0G01574g	LACI0F17744g	LAFE0E12530g	LADA0E09384g	LAFA0F20362g	LAMI0C10352g	SAKL0E09394g	KLTH0G08778g
L.A1	A1LA03-049446g	3	+	200	1824	LANO0H08196g	LAME0D06436g	ZYRO0C15048g	LAWA0G01552g	LACI0F17722g	LAFE0E12508g	LADA0E09362g	LAFA0F20340g	LAMI0C10308g	SAKL0E09306g	KLTH0G08756g
L.A1	A1LA03-049424g	3	+	201	1825	LANO0H08130g	LAME0D06370g	ZYRO0C15026g	LAWA0G01618g	LACI0F17700g	LAFE0E12486g	LADA0E09428g	LAFA0F20406g	LAMI0C08768g	SAKL0E09284g	KLTH0G08822g
L.A1	A1LA03-049380g	3	+	202	1826	LANO0H08086g	LAME0D06326g	ZYRO0C14982g	LAWA0G01662g	LACI0F17656g	LAFE0E12442g	LADA0E09472g	LAFA0F20450g	LAMI0C08724g	SAKL0E09240g	KLTH0G08866g
L.A1	A1LA03-049358g	3	-	203	1827	LANO0H08064g	LAME0D06304g	ZYRO0A00990g	LAWA0G01684g	LACI0F17634g	LAFE0E12420g	LADA0E09494g	LAFA0F20472g	LAMI0C08702g	SAKL0E09218g	KLTH0G08888g
L.A1	A1LA03-049336g	3	+	204	1828	LANO0H08042g	LAME0D06282g	ZYRO0A01034g	LAWA0G09164g	LACI0F17612g	LAFE0E12398g	LADA0E09560g	LAFA0F20494g	LAMI0C08680g	SAKL0E09152g	KLTH0G08954g
L.A1	A1LA03-049314g	3	+	205	1829	LANO0H08020g	LAME0D06260g	ZYRO0A01100g	LAWA0G09186g	LACI0F17590g	LAFE0E12376g	LADA0E09582g	LAFA0F20516g	LAMI0C08658g	SAKL0E09130g	KLTH0G08976g
L.A1	A1LA03-049292g	3	+	206	1830	LANO0H07998g	LAME0D06216g	ZYRO0A01144g	LAWA0G09208g	LACI0F17568g	LAFE0E12354g	LADA0E09604g	LAFA0F20538g	LAMI0C08636g	SAKL0E09108g	KLTH0G08998g
L.A1	A1LA03-049270g	3	+	207	1831	LANO0H07976g	LAME0D06194g	ZYRO0A01166g	LAWA0G09230g	LACI0F17546g	LAFE0E12332g	LADA0E09626g	LAFA0F20560g	LAMI0C08614g	SAKL0E09097g	KLTH0G09009g
L.A1	A1LA03-049248g	3	+	208	1832	LANO0H07954g	LAME0D06172g	ZYRO0A01188g	LAWA0G09252g	LACI0F17524g	LAFE0E12310g	LADA0E09648g	LAFA0F20582g	LAMI0C08592g	SAKL0E09086g	KLTH0G09020g
L.A1	A1LA03-049226g	3	-	209	1833	LANO0H07932g	LAME0D06150g	ZYRO0A01210g	LAWA0G09274g	LACI0F17502g	LAFE0E12288g	LADA0E09670g	LAFA0F20604g	LAMI0C08570g	SAKL0E09064g	KLTH0G09042g
L.A1	A1LA03-049204g	3	-	210	1834	LANO0H07910g	LAME0D06128g	ZYRO0A01232g	LAWA0G09296g	LACI0F17480g	LAFE0E12266g	LADA0E09692g	LAFA0F20626g	LAMI0C08548g	SAKL0E09042g	KLTH0G09064g
L.A1	A1LA03-049182g	3	-	211	1835	LANO0H07888g	LAME0D06106g	ZYRO0A01254g	LAWA0G09318g	LACI0F17458g	LAFE0E12244g	LADA0E09714g	LAFA0F20648g	LAMI0C08526g	SAKL0E09020g	KLTH0G09086g
L.A1	A1LA03-049138g	3	-	212	1836	LANO0H07844g	LAME0D06062g	ZYRO0A01276g	LAWA0G09362g	LACI0F17414g	LAFE0E12200g	LADA0E09758g	LAFA0F20714g	LAMI0C08482g	SAKL0E08976g	KLTH0G09130g
L.A1	A1LA03-049116g	3	+	213	1837	LANO0H07822g	LAME0D06040g	ZYRO0A01298g	LAWA0G09384g	LACI0F17392g	LAFE0E12178g	LADA0E09780g	LAFA0F20736g	LAMI0C08460g	SAKL0E08954g	KLTH0G09152g
L.A1	A1LA03-049094g	3	-	214	1838	LANO0H07800g	LAME0D06018g	ZYRO0A01320g	LAWA0G09406g	LACI0F17370g	LAFE0E12156g	LADA0E09802g	LAFA0F20758g	LAMI0C08438g	SAKL0E08932g	KLTH0G09174g
L.A1	A1LA03-049072g	3	+	215	1839	LANO0H07778g	LAME0D05996g	ZYRO0A01342g	LAWA0G09428g	LACI0F17348g	LAFE0E12134g	LADA0E09824g	LAFA0F20780g	LAMI0C08416g	SAKL0E08910g	KLTH0G09196g
L.A1	A1LA03-049050g	3	+	216	1840	LANO0H07756g	LAME0D05974g	ZYRO0A01364g	LAWA0G09450g	LACI0F17326g	LAFE0E12112g	LADA0E09846g	LAFA0F20802g	LAMI0C08394g	SAKL0E08888g	KLTH0G09218g
L.A1	A1LA03-049028g	3	+	217	1841	LANO0H07712g	LAME0D05930g	ZYRO0A01386g	LAWA0G09494g	LACI0F17282g	LAFE0E12068g	LADA0E09890g	LAFA0F20846g	LAMI0C08350g	SAKL0E08866g	KLTH0G09262g
L.A1	A1LA03-049006g	3	+	218	1842			ZYRO0A01408g		LACI0F17260g	LAFE0E12046g			LAMI0C08306g	SAKL0E08844g	KLTH0G09284g
L.A1	A1LA03-048984g	3	+	219	1843	LANO0H07690g	LAME0D05908g	ZYRO0A01430g	LAWA0G09516g	LACI0F17238g	LAFE0E12024g	LADA0E09912g	LAFA0F20868g	LAMI0C08284g	SAKL0E08822g	KLTH0G09306g
L.A1	A1LA03-048962g	3	+	220	1844			ZYRO0A01452g							SAKL0E08800g
L.A1	A1LA03-048940g	3	+	221	1845	LANO0H07624g	LAME0D05886g	ZYRO0A01474g	LAWA0G09604g	LACI0F17216g	LAFE0E12002g	LADA0E09934g	LAFA0F20890g	LAMI0C08262g	SAKL0E08778g	KLTH0G09350g
L.A1	A1LA03-048896g	3	-	222	1846	LANO0H07580g	LAME0D05842g	ZYRO0A01496g	LAWA0G09648g	LACI0F17172g	LAFE0E11958g	LADA0E10000g	LAFA0F20934g	LAMI0C08218g	SAKL0E08734g	KLTH0G09394g
L.A1	A1LA03-048874g	3	+	223	1847	LANO0H07558g	LAME0D05820g	ZYRO0A01518g	LAWA0G09670g	LACI0F17150g	LAFE0E11936g	LADA0E10022g	LAFA0F20956g	LAMI0C08196g	SAKL0E08668g	KLTH0G09416g
L.A1	A1LA03-048852g	3	-	224	1848	LANO0H07536g	LAME0D05798g	ZYRO0A01540g	LAWA0G09692g	LACI0F17128g	LAFE0E11914g	LADA0E10044g	LAFA0F20978g	LAMI0C08174g	SAKL0E08646g	KLTH0G09438g
L.A1	A1LA03-048830g	3	+	225	1849	LANO0H07514g	LAME0D05776g	ZYRO0A01562g	LAWA0G09714g	LACI0F17106g	LAFE0E11892g	LADA0E10066g	LAFA0F21000g	LAMI0C08152g	SAKL0E08624g	KLTH0G09460g
L.A1	A1LA03-048808g	3	-	226	1850	LANO0H07492g	LAME0D05754g	ZYRO0A01584g	LAWA0G09736g	LACI0F17084g	LAFE0E11870g	LADA0E10088g	LAFA0F21022g	LAMI0C08130g	SAKL0E08602g	KLTH0G09482g
L.A1	A1LA03-048764g	3	+	227	1851	LANO0H07448g	LAME0D05710g	ZYRO0A01606g	LAWA0G09802g	LACI0F17040g	LAFE0E11826g	LADA0E10132g	LAFA0F21066g	LAMI0C08086g	SAKL0E08558g	KLTH0G09548g
L.A1	A1LA03-048742g	3	-	228	1852	LANO0H07426g	LAME0D05688g	ZYRO0A01628g	LAWA0G09824g	LACI0F17018g	LAFE0E11804g	LADA0E10154g	LAFA0F21088g	LAMI0C08064g	SAKL0E08536g	KLTH0G09570g
L.A1	A1LA03-048720g	3	+	229	1853	LANO0H07404g	LAME0D05666g	ZYRO0A01650g	LAWA0G09846g	LACI0F16996g	LAFE0E11782g	LADA0E10176g	LAFA0F21110g	LAMI0C08042g	SAKL0E08514g	KLTH0G09592g
L.A1	A1LA03-048698g	3	+	230	1854	LANO0H07382g	LAME0D05644g	ZYRO0A01672g	LAWA0G09868g	LACI0F16974g	LAFE0E11760g	LADA0E10198g	LAFA0F21132g	LAMI0C08020g	SAKL0E08492g	KLTH0G09614g
L.A1	A1LA03-048676g	3	-	231	1855	LANO0H07360g	LAME0D05622g	ZYRO0A01694g	LAWA0G09890g	LACI0F16952g	LAFE0E11738g	LADA0E10220g	LAFA0F21154g	LAMI0C07998g	SAKL0E08470g	KLTH0G09636g
L.A1	A1LA03-048654g	3	-	232	1856	LANO0H07338g	LAME0D05600g	ZYRO0A01716g		LACI0F16930g	LAFE0E11716g	LADA0E10242g	LAFA0F21176g	LAMI0C07976g	SAKL0E08448g	KLTH0G09658g
L.A1	A1LA03-048632g	3	+	233	1857	LANO0H07316g	LAME0D05578g	ZYRO0A01738g	LAWA0G09934g	LACI0F16908g	LAFE0E11694g	LADA0E10264g	LAFA0E02454g	LAMI0C07932g	SAKL0E08426g	KLTH0G09680g
L.A1	A1LA03-048610g	3	+	234	1858	LANO0H07294g	LAME0D05556g	ZYRO0A01760g	LAWA0G09956g	LACI0F16886g	LAFE0E11672g	LADA0E10286g	LAFA0E02432g	LAMI0C07910g	SAKL0E08404g	KLTH0G09702g
L.A1	A1LA03-048588g	3	+	235	1859	LANO0H07272g	LAME0D05534g	ZYRO0D02332g	LAWA0G09978g	LACI0F16864g	LAFE0E11650g	LADA0E10308g	LAFA0E02410g	LAMI0C07866g	SAKL0E08382g	KLTH0G09724g
L.A1	A1LA03-048566g	3	+	236	1860	LANO0H07250g	LAME0D05512g	ZYRO0D02354g	LAWA0G10000g	LACI0F16842g	LAFE0E11628g	LADA0E10330g	LAFA0E02388g	LAMI0E04544g	SAKL0E08360g	KLTH0G09746g
L.A1	A1LA03-048544g	3	+	237	1861	LANO0H07228g	LAME0D05490g	ZYRO0D02376g	LAWA0G10022g	LACI0F16820g	LAFE0E11606g	LADA0E10352g	LAFA0E02366g	LAMI0E04522g	SAKL0E08338g	KLTH0G09768g
L.A1	A1LA03-048522g	3	+	238	1862	LANO0H07206g	LAME0D05468g	ZYRO0D02398g	LAWA0G10044g	LACI0F16798g	LAFE0E11584g	LADA0E10374g	LAFA0E02344g	LAMI0E04500g	SAKL0E08316g	KLTH0G09790g
L.A1	A1LA03-048500g	3	-	239	1863	LANO0H07184g	LAME0D05446g	ZYRO0D02420g	LAWA0G10066g	LACI0F16776g	LAFE0E11562g	LADA0E10396g	LAFA0E02322g	LAMI0E04478g	SAKL0E08294g	KLTH0G09812g
L.A1	A1LA03-048478g	3	-	240	1864	LANO0H07162g	LAME0D05424g	ZYRO0D02442g	LAWA0G10088g	LACI0F16754g	LAFE0E11540g	LADA0E10418g	LAFA0E02300g	LAMI0E04456g	SAKL0E08272g	KLTH0G09834g
L.A1	A1LA03-048456g	3	+	241	1865	LANO0H07140g	LAME0D05402g	ZYRO0D02464g	LAWA0G10110g	LACI0F16732g	LAFE0E11518g	LADA0E10440g	LAFA0E02278g	LAMI0E04434g	SAKL0E08250g	KLTH0G09856g
L.A1	A1LA03-048434g	3	-	242	1866	LANO0H07118g	LAME0D05380g	ZYRO0D02486g	LAWA0G10132g	LACI0F16710g	LAFE0E11496g	LADA0E10462g	LAFA0E02256g	LAMI0E04412g	SAKL0E08228g	KLTH0G09878g
L.A1	A1LA03-048412g	3	+	243	1867	LANO0H07096g	LAME0G13190g	ZYRO0D02508g	LAWA0G10154g	LACI0F16688g	LAFE0E11452g	LADA0E10484g	LAFA0E21264g	LAMI0E04390g	SAKL0E08206g	KLTH0G09900g
L.A1	A1LA03-048390g	3	+	244	1868	LANO0H07074g	LAME0G13168g	ZYRO0D02530g	LAWA0G10176g	LACI0F16666g	LAFE0E11430g	LADA0E10506g	LAFA0E21242g	LAMI0E04368g	SAKL0E08184g	KLTH0G09922g
L.A1	A1LA03-048368g	3	-	245	1869	LANO0H07052g	LAME0G13146g	ZYRO0D02552g	LAWA0G10198g	LACI0F16644g	LAFE0E11408g	LADA0E10528g	LAFA0E21220g	LAMI0E04346g	SAKL0E08162g	KLTH0G09944g
L.A1	A1LA03-048324g	3	+	246	1870	LANO0H07008g	LAME0G13102g	ZYRO0D02574g	LAWA0G10242g	LACI0F16600g	LAFE0E11364g	LADA0E10572g	LAFA0E21176g	LAMI0E04324g	SAKL0E08118g
L.A1	A1LA03-048302g	3	+	247	1871	LANO0H06986g	LAME0G13080g	ZYRO0D02596g	LAWA0G10264g	LACI0F16578g	LAFE0E11342g	LADA0E10594g	LAFA0E21154g	LAMI0E04302g	SAKL0E08096g	KLTH0G09988g
L.A1	A1LA03-048280g	3	+	248	1872	LANO0H06964g	LAME0G13058g	ZYRO0D02618g	LAWA0G10286g	LACI0F16556g	LAFE0E11320g	LADA0E10616g	LAFA0E21132g	LAMI0E04280g	SAKL0E08074g	KLTH0G10010g
L.A1	A1LA03-048258g	3	-	249	1873	LANO0H06942g	LAME0G13036g	ZYRO0D02640g	LAWA0G10308g	LACI0F16534g	LAFE0E11298g	LADA0E10638g	LAFA0E21110g	LAMI0E04258g	SAKL0E08052g	KLTH0G10032g
L.A1	A1LA03-048236g	3	+	250	1874	LANO0H06920g	LAME0G13014g	ZYRO0D02662g	LAWA0G10330g	LACI0F16512g	LAFE0E11276g	LADA0E10660g	LAFA0E21088g	LAMI0E04236g	SAKL0E08030g	KLTH0G10054g
L.A1	A1LA03-048214g	3	-	251	1875	LANO0H06898g	LAME0G12992g	ZYRO0D02684g	LAWA0G10352g	LACI0F16490g	LAFE0E11254g	LADA0E10682g	LAFA0E21066g	LAMI0E04214g	SAKL0E08008g	KLTH0G10076g
L.A1	A1LA03-048192g	3	-	252	1876	LANO0H06876g	LAME0G12970g	ZYRO0D02728g	LAWA0G10374g	LACI0F16468g	LAFE0E11232g	LADA0E10704g	LAFA0E21044g	LAMI0E04192g	SAKL0E07964g	KLTH0G10098g
L.A1	A1LA03-048170g	3	-	253	1877	LANO0H06788g	LAME0G12948g	ZYRO0D02750g	LAWA0G10396g	LACI0F16424g	LAFE0E11188g	LADA0E10748g	LAFA0E20978g	LAMI0E04170g	SAKL0E07942g	KLTH0G10120g
L.A1	A1LA03-048148g	3	+	254	1878	LANO0H06766g	LAME0G12926g	ZYRO0D02772g	LAWA0G10418g	LACI0F16402g	LAFE0E11166g	LADA0E10770g	LAFA0E20956g	LAMI0E04148g	SAKL0E07920g	KLTH0G10142g
L.A1	A1LA03-048126g	3	-	255	1879	LANO0H06744g	LAME0G12904g	ZYRO0D02794g	LAWA0G10440g	LACI0F16380g	LAFE0E11144g	LADA0E10792g	LAFA0E20934g	LAMI0E04126g	SAKL0E07898g	KLTH0G10164g
L.A1	A1LA03-048104g	3	+	256	1880	LANO0H06722g	LAME0G12882g	ZYRO0D02838g	LAWA0G10462g	LACI0F16358g	LAFE0E11122g	LADA0E10814g	LAFA0E20912g	LAMI0E04104g	SAKL0E07876g	KLTH0G10186g
L.A1	A1LA03-048082g	3	+	257	1881	LANO0H06700g	LAME0G12860g	ZYRO0D02860g	LAWA0F09516g	LACI0F16336g	LAFE0E11100g	LADA0E10836g	LAFA0E20890g	LAMI0E04082g	SAKL0E07854g	KLTH0G10208g
L.A1	A1LA03-048060g	3	-	258	1882	LANO0H06678g	LAME0G12838g	ZYRO0D02882g	LAWA0F09494g	LACI0F16314g	LAFE0E11078g	LADA0E10858g	LAFA0E20868g	LAMI0E04060g	SAKL0E07832g	KLTH0G10230g
L.A1	A1LA03-048038g	3	-	259	1883	LANO0H06656g	LAME0G12816g	ZYRO0D02904g	LAWA0F09472g	LACI0F16292g	LAFE0E11056g	LADA0E10880g	LAFA0E20846g	LAMI0E04038g	SAKL0E07810g	KLTH0G10252g
L.A1	A1LA03-048016g	3	-	260	1884	LANO0H06634g	LAME0G12794g	ZYRO0D02926g	LAWA0F09450g	LACI0F16270g	LAFE0E11034g	LADA0E10902g	LAFA0E20824g	LAMI0E04016g	SAKL0E07788g	KLTH0G10274g
L.A1	A1LA03-047994g	3	-	261	1885	LANO0H06612g	LAME0G12772g	ZYRO0A01804g	LAWA0F09428g	LACI0F16248g	LAFE0E11012g	LADA0E10924g	LAFA0E20802g	LAMI0E03994g	SAKL0E07766g	KLTH0G10296g
L.A1	A1LA03-047972g	3	+	262	1886	LANO0H06590g	LAME0G12750g	ZYRO0A01848g	LAWA0F09384g	LACI0F16226g	LAFE0E10990g	LADA0E10946g	LAFA0E20780g	LAMI0E03972g	SAKL0E07722g	KLTH0G10318g
L.A1	A1LA03-047950g	3	-	263	1887	LANO0H06568g	LAME0G12728g	ZYRO0A01870g	LAWA0F09362g	LACI0F16204g	LAFE0E10968g	LADA0E10968g	LAFA0E20758g	LAMI0E03950g	SAKL0E07700g	KLTH0G10340g
L.A1	A1LA03-047928g	3	+	264	1888	LANO0H06546g	LAME0G12706g	ZYRO0A01892g	LAWA0F09340g	LACI0F16182g	LAFE0E10946g	LADA0E10990g	LAFA0E20736g	LAMI0E03928g	SAKL0E07678g	KLTH0G10362g
L.A1	A1LA03-047906g	3	-	265	1889	LANO0H06524g	LAME0G12684g	ZYRO0A01914g	LAWA0F09318g	LACI0F16160g	LAFE0E10924g	LADA0E11012g	LAFA0E20714g	LAMI0E03906g	SAKL0E07656g	KLTH0G10384g
L.A1	A1LA03-047884g	3	+	266	1890	LANO0H06502g	LAME0G12662g	ZYRO0A01936g	LAWA0F09296g	LACI0F16138g	LAFE0E10902g	LADA0E11034g	LAFA0E20692g	LAMI0E03884g	SAKL0E07634g	KLTH0G10406g
L.A1	A1LA03-047840g	3	-	267	1891	LANO0H06458g	LAME0G12618g	ZYRO0A01958g	LAWA0F09252g	LACI0F16094g	LAFE0E10858g	LADA0E11078g	LAFA0E20648g	LAMI0E03840g	SAKL0E07590g	KLTH0G10450g
L.A1	A1LA03-047818g	3	+	268	1892	LANO0H06436g	LAME0G12596g	ZYRO0A01980g	LAWA0F09230g	LACI0F16072g	LAFE0E10836g	LADA0E11100g	LAFA0E20626g	LAMI0E03818g	SAKL0E07568g	KLTH0G10472g
L.A1	A1LA03-047796g	3	-	269	1893	LANO0H06414g	LAME0G12574g	ZYRO0A02002g	LAWA0F09208g	LACI0F16050g	LAFE0E10814g	LADA0E11122g	LAFA0E20604g	LAMI0E03796g	SAKL0E07546g	KLTH0G10494g
L.A1	A1LA03-047774g	3	+	270	1894	LANO0H06392g	LAME0G12552g	ZYRO0A02024g	LAWA0F09186g	LACI0F16028g	LAFE0E10792g	LADA0E11144g	LAFA0E20582g	LAMI0E03774g	SAKL0E07524g	KLTH0G10516g
L.A1	A1LA03-047752g	3	+	271	1895	LANO0H06370g	LAME0G12530g	ZYRO0A02068g	LAWA0F09164g	LACI0F16006g	LAFE0E10770g	LADA0E11166g	LAFA0E20560g	LAMI0E03752g	SAKL0E07480g	KLTH0G10560g
L.A1	A1LA03-047708g	3	-	272	1896	LANO0H06326g	LAME0G12486g	ZYRO0A02112g	LAWA0F09120g	LACI0F15962g	LAFE0E10726g	LADA0E11210g	LAFA0E20516g	LAMI0E03708g	SAKL0E07392g	KLTH0G10604g
L.A1	A1LA03-047686g	3	+	273	1897	LANO0H06304g	LAME0G12464g	ZYRO0A02134g	LAWA0F09098g	LACI0F15940g	LAFE0E10704g	LADA0E11232g	LAFA0E20494g	LAMI0E03686g	SAKL0E07370g	KLTH0G10626g
L.A1	A1LA03-047664g	3	-	274	1898	LANO0H06282g	LAME0G12442g	ZYRO0A02156g	LAWA0F09076g	LACI0F15918g	LAFE0E10682g	LADA0E11254g	LAFA0E20472g	LAMI0E03664g	SAKL0E07348g	KLTH0G10648g
L.A1	A1LA03-047642g	3	-	275	1899	LANO0H06260g	LAME0G12420g	ZYRO0A02178g	LAWA0F09054g	LACI0F15896g	LAFE0E10660g	LADA0F05930g	LAFA0E20450g	LAMI0E03642g	SAKL0E07326g	KLTH0G16258g
L.A1	A1LA03-047620g	3	+	276	1900	LANO0H06238g	LAME0G12398g	ZYRO0A02200g	LAWA0F09032g	LACI0F15874g	LAFE0E10638g	LADA0F05908g	LAFA0E20428g	LAMI0E03620g	SAKL0E07304g	KLTH0G16236g
L.A1	A1LA03-047598g	3	-	277	1901	LANO0H06216g	LAME0G12376g	ZYRO0A02222g	LAWA0F09010g	LACI0F15852g	LAFE0E10616g	LADA0E11320g		LAMI0E03598g	SAKL0E07282g	KLTH0G10714g
L.A1	A1LA03-047576g	3	-	278	1902	LANO0H06194g	LAME0G12354g	ZYRO0A02244g	LAWA0F08988g	LACI0F15830g	LAFE0E10594g	LADA0E11342g	LAFA0E20406g	LAMI0E03576g	SAKL0E07260g	KLTH0G10758g
L.A1	A1LA03-047554g	3	+	279	1903	LANO0H06172g	LAME0G12332g	ZYRO0A02266g	LAWA0F08966g	LACI0F15808g	LAFE0E10572g	LADA0E11364g	LAFA0E20384g	LAMI0E03554g	SAKL0E07238g	KLTH0G10780g
L.A1	A1LA03-047532g	3	+	280	1904	LANO0H06150g	LAME0G12310g	ZYRO0A02288g	LAWA0F08944g	LACI0F15786g	LAFE0E10550g	LADA0E11386g	LAFA0E20362g	LAMI0E03532g	SAKL0E07216g	KLTH0G10802g
L.A1	A1LA03-047510g	3	+	281	1905	LANO0H06128g	LAME0G12288g	ZYRO0A02310g	LAWA0F08922g	LACI0F15764g	LAFE0E10528g	LADA0E11408g	LAFA0E20340g	LAMI0E03510g	SAKL0E07194g	KLTH0G10824g
L.A1	A1LA03-047488g	3	-	282	1906	LANO0H06106g	LAME0G12266g	ZYRO0A02332g	LAWA0F08900g	LACI0F15742g	LAFE0E10506g	LADA0E11430g	LAFA0E20318g	LAMI0E03488g	SAKL0E07172g	KLTH0G10846g
L.A1	A1LA03-047466g	3	+	283	1907	LANO0H06084g	LAME0G12244g	ZYRO0A02398g	LAWA0F08856g	LACI0F15698g	LAFE0E10484g	LADA0E11452g	LAFA0E20296g	LAMI0E03466g	SAKL0E07128g	KLTH0G10912g
L.A1	A1LA03-047444g	3	+	284	1908	LANO0H06062g	LAME0G12222g	ZYRO0A02420g	LAWA0F08834g	LACI0F15676g	LAFE0E10462g	LADA0E11474g	LAFA0E20274g	LAMI0E03444g	SAKL0E07106g	KLTH0G10934g
L.A1	A1LA03-047400g	3	+	285	1909	LANO0H06018g	LAME0G12178g	ZYRO0A02464g	LAWA0F08790g	LACI0F15632g	LAFE0E10418g	LADA0E11518g	LAFA0E20230g	LAMI0E03400g	SAKL0E07062g	KLTH0G10978g
L.A1	A1LA03-047356g	3	+	286	1910	LANO0H05952g	LAME0G12134g	ZYRO0A02486g	LAWA0F08746g	LACI0F15588g	LAFE0E10374g	LADA0E12024g	LAFA0E20186g	LAMI0E03356g	SAKL0E07018g	KLTH0G11000g
L.A1	A1LA03-047334g	3	+	287	1911	LANO0H05930g	LAME0G12112g	ZYRO0A02508g	LAWA0F08724g	LACI0F15566g	LAFE0E10352g	LADA0E12002g	LAFA0E20164g	LAMI0E03334g	SAKL0E06996g	KLTH0G11022g
L.A1	A1LA03-047312g	3	-	288	1912	LANO0H05908g	LAME0G12090g	ZYRO0A02530g	LAWA0F08702g	LACI0F15544g	LAFE0E10330g	LADA0E11980g	LAFA0E20142g	LAMI0E03312g	SAKL0E06974g	KLTH0G11044g
L.A1	A1LA03-047290g	3	-	289	1913	LANO0H05886g	LAME0G12068g	ZYRO0A02552g	LAWA0F08680g	LACI0F15522g	LAFE0E10308g	LADA0E11958g	LAFA0E20120g	LAMI0E03180g	SAKL0E06952g	KLTH0G11066g
L.A1	A1LA03-047268g	3	+	290	1914	LANO0H05864g	LAME0G12046g	ZYRO0A02574g	LAWA0F08658g	LACI0F15500g	LAFE0E10286g	LADA0E11936g	LAFA0E20098g	LAMI0E03158g	SAKL0E06930g	KLTH0G11088g
L.A1	A1LA03-047246g	3	+	291	1915	LANO0H05842g	LAME0G12024g	ZYRO0A02596g	LAWA0F08636g	LACI0F15478g	LAFE0E10264g	LADA0E11914g	LAFA0E20076g	LAMI0E03136g	SAKL0E06908g	KLTH0G11110g
L.A1	A1LA03-047224g	3	-	292	1916	LANO0H05820g	LAME0G12002g	ZYRO0A02618g	LAWA0F08614g	LACI0F15456g	LAFE0E10242g	LADA0E11892g	LAFA0E20054g	LAMI0E03114g	SAKL0E06886g	KLTH0G11132g
L.A1	A1LA03-047180g	3	+	293	1917	LANO0G08658g	LAME0E04346g	ZYRO0A02640g	LAWA0G03114g	LACI0F15346g	LAFE0E10132g	LADA0C01618g	LAFA0G08680g	LAMI0E03048g	SAKL0E06842g	KLTH0F09218g
L.A1	A1LA03-047158g	3	+	294	1918	LANO0G08724g	LAME0E04412g	ZYRO0A02662g	LAWA0G03136g	LACI0F15324g	LAFE0E10110g	LADA0C01640g	LAFA0G08702g	LAMI0E02982g	SAKL0E06820g	KLTH0F09240g
L.A1	A1LA03-047136g	3	+	295	1919	LANO0G08702g	LAME0E04390g	ZYRO0A02684g	LAWA0G03158g	LACI0F15302g	LAFE0E10088g	LADA0C01662g	LAFA0G08724g	LAMI0E03004g	SAKL0E06798g	KLTH0F09262g
L.A1	A1LA03-047114g	3	-	296	1920	LANO0G08724g	LAME0E04412g	ZYRO0F08030g	LAWA0G03180g	LACI0F15280g	LAFE0E10066g	LADA0C01684g	LAFA0G08746g	LAMI0E02982g	SAKL0E06776g	KLTH0F09284g
L.A1	A1LA03-047092g	3	-	297	1921	LANO0G08746g	LAME0E04434g	ZYRO0F08008g	LAWA0G03202g	LACI0F15258g	LAFE0E10044g	LADA0C01706g	LAFA0G08768g	LAMI0E02960g	SAKL0E06754g	KLTH0F09306g
L.A1	A1LA03-047070g	3	+	298	1922			ZYRO0F07986g					LAFA0G08812g		SAKL0E06732g
L.A1	A1LA03-047048g	3	-	299	1923	LANO0G08768g	LAME0E04456g	ZYRO0F07964g	LAWA0G03224g	LACI0F15236g	LAFE0E10022g	LADA0C01728g	LAFA0G08790g	LAMI0E02938g	SAKL0E06710g	KLTH0F09328g
L.A1	A1LA03-047026g	3	+	300	1924	LANO0G08790g	LAME0E04478g	ZYRO0F07942g	LAWA0G03246g	LACI0F15214g	LAFE0E10000g	LADA0C01750g	LAFA0G08812g	LAMI0E02916g	SAKL0E06688g	KLTH0F09350g
L.A1	A1LA03-047004g	3	-	301	1925	LANO0G08812g	LAME0E04500g	ZYRO0F07920g	LAWA0G03268g	LACI0F15192g	LAFE0E09978g	LADA0C01772g	LAFA0G08834g	LAMI0E02894g	SAKL0E06666g	KLTH0F09372g
L.A1	A1LA03-046982g	3	-	302	1926	LANO0G08834g	LAME0E04522g	ZYRO0F07898g	LAWA0G03290g	LACI0F15170g	LAFE0E09956g	LADA0C01794g	LAFA0G08856g	LAMI0E02872g	SAKL0E06644g	KLTH0F09394g
L.A1	A1LA03-046960g	3	-	303	1927	LANO0G08856g	LAME0E04544g	ZYRO0F07876g	LAWA0G03312g	LACI0F15148g	LAFE0E09934g	LADA0C01816g	LAFA0G08878g	LAMI0E02850g	SAKL0E06622g	KLTH0F09416g
L.A1	A1LA03-046938g	3	+	304	1928	LANO0G08878g	LAME0E04566g	ZYRO0F07854g	LAWA0G03334g	LACI0F15126g	LAFE0E09912g	LADA0C01838g	LAFA0G08900g	LAMI0E02828g	SAKL0E06600g	KLTH0F09438g
L.A1	A1LA03-046916g	3	-	305	1929	LANO0G08900g	LAME0E04588g	ZYRO0F07832g	LAWA0G03356g	LACI0F15104g	LAFE0E09890g	LADA0C01860g	LAFA0G08922g	LAMI0E02806g	SAKL0E06578g	KLTH0F09460g
L.A1	A1LA03-046894g	3	-	306	1930	LANO0G08922g	LAME0E04610g	ZYRO0A07040g	LAWA0G03378g	LACI0F15082g	LAFE0E09868g	LADA0C01882g	LAFA0G08944g	LAMI0E02784g	SAKL0E06556g	KLTH0F09482g
L.A1	A1LA03-046872g	3	+	307	1931	LANO0G08944g	LAME0E04632g	ZYRO0A07062g	LAWA0G03400g	LACI0F15060g	LAFE0E09846g	LADA0C01904g	LAFA0G08966g	LAMI0E02762g	SAKL0E06534g	KLTH0F09504g
L.A1	A1LA03-046850g	3	-	308	1932	LANO0G08966g	LAME0E04654g	ZYRO0A07084g	LAWA0G03422g	LACI0F15038g	LAFE0E09824g	LADA0C01926g	LAFA0G08988g	LAMI0E02740g	SAKL0E06512g	KLTH0F09526g
L.A1	A1LA03-046828g	3	+	309	1933	LANO0G09010g	LAME0E04676g	ZYRO0A07106g	LAWA0G03444g	LACI0F15016g	LAFE0E09802g	LADA0C01948g	LAFA0G09010g	LAMI0E02718g	SAKL0E06490g	KLTH0F09548g
L.A1	A1LA03-046806g	3	-	310	1934	LANO0G09032g	LAME0E04698g	ZYRO0A07128g	LAWA0G03466g	LACI0F14994g	LAFE0E09780g	LADA0C01970g	LAFA0G09032g	LAMI0E02696g	SAKL0E06468g	KLTH0F09570g
L.A1	A1LA03-046784g	3	+	311	1935	LANO0G09054g	LAME0E04720g	ZYRO0A07150g	LAWA0G03488g	LACI0F14972g	LAFE0E09758g	LADA0C01992g	LAFA0G09054g	LAMI0E02674g	SAKL0E06446g	KLTH0F09592g
L.A1	A1LA03-046762g	3	+	312	1936	LANO0G09076g	LAME0E04742g	ZYRO0A07172g	LAWA0G03532g	LACI0F14950g	LAFE0E09736g	LADA0C02014g	LAFA0G09076g	LAMI0E02652g	SAKL0E06424g	KLTH0F09614g
L.A1	A1LA03-046740g	3	-	313	1937	LANO0G09098g	LAME0E04764g	ZYRO0A07194g	LAWA0G03554g	LACI0F14928g	LAFE0E09714g	LADA0C02036g	LAFA0G09098g	LAMI0E02630g	SAKL0E06402g	KLTH0F09636g
L.A1	A1LA03-046718g	3	-	314	1938	LANO0G09120g	LAME0E04786g	ZYRO0A07216g	LAWA0G03576g	LACI0F14906g	LAFE0E09692g	LADA0C02058g	LAFA0G09120g	LAMI0E02608g	SAKL0E06380g	KLTH0F09658g
L.A1	A1LA03-046696g	3	+	315	1939	LANO0G09142g	LAME0E04808g	ZYRO0A07238g	LAWA0G03598g	LACI0F14884g	LAFE0E09670g	LADA0C02080g	LAFA0G09142g	LAMI0E02586g	SAKL0E06358g	KLTH0F09680g
L.A1	A1LA03-046674g	3	+	316	1940	LANO0G09164g	LAME0E04830g	ZYRO0A07260g	LAWA0G03620g	LACI0F14862g	LAFE0E09648g	LADA0C02102g	LAFA0G09164g	LAMI0E02564g	SAKL0E06336g	KLTH0F09702g
L.A1	A1LA03-046652g	3	-	317	1941	LANO0G09186g	LAME0E04852g	ZYRO0A07282g	LAWA0G03642g	LACI0F14840g	LAFE0E09626g	LADA0C02124g	LAFA0G09186g	LAMI0E02542g	SAKL0E06314g	KLTH0F09724g
L.A1	A1LA03-046630g	3	+	318	1942	LANO0G09208g	LAME0E04874g	ZYRO0A07304g	LAWA0G03664g	LACI0F14818g	LAFE0E09604g	LADA0C02146g	LAFA0G09208g	LAMI0E02520g	SAKL0E06292g	KLTH0F09746g
L.A1	A1LA03-046608g	3	-	319	1943	LANO0G09230g	LAME0E04896g	ZYRO0A07326g	LAWA0G03675g	LACI0F14796g	LAFE0E09582g	LADA0C02168g	LAFA0G09230g	LAMI0E02498g	SAKL0E06270g	KLTH0F09768g
L.A1	A1LA03-046586g	3	+	320	1944	LANO0G09252g	LAME0E04918g	ZYRO0A07348g	LAWA0G03686g	LACI0F14774g	LAFE0E09560g	LADA0C02190g	LAFA0G09252g	LAMI0E02476g	SAKL0E06248g	KLTH0F09790g
L.A1	A1LA03-046564g	3	+	321	1945	LANO0G09274g	LAME0E04940g	ZYRO0A07370g	LAWA0G03708g	LACI0F14752g	LAFE0E09538g	LADA0C02212g	LAFA0G09274g	LAMI0E02454g	SAKL0E06226g	KLTH0F09812g
L.A1	A1LA03-046542g	3	+	322	1946	LANO0G09296g	LAME0E04962g	ZYRO0A07392g	LAWA0G03730g	LACI0F14730g	LAFE0E09516g	LADA0C02234g	LAFA0G09296g	LAMI0E02432g	SAKL0E06204g	KLTH0F09834g
L.A1	A1LA03-046520g	3	+	323	1947	LANO0G09318g	LAME0E04984g	ZYRO0A07436g	LAWA0G03752g	LACI0F14686g	LAFE0E09472g	LADA0C02256g	LAFA0G09318g	LAMI0E02410g	SAKL0E06138g	KLTH0F09878g
L.A1	A1LA03-046498g	3	+	324	1948	LANO0G09362g	LAME0E05028g	ZYRO0A07480g	LAWA0G03796g	LACI0F14642g	LAFE0E09428g	LADA0C02322g	LAFA0G09362g	LAMI0E02366g	SAKL0E06072g	KLTH0F09922g
L.A1	A1LA03-046476g	3	-	325	1949	LANO0G09384g	LAME0E05050g	ZYRO0A07502g		LACI0F14620g		LADA0C02300g	LAFA0G09384g	LAMI0E02344g	SAKL0E06050g	KLTH0F09944g
L.A1	A1LA03-046388g	3	+	326	1950	LANO0G09406g	LAME0E05072g	ZYRO0A07524g	LAWA0G03840g	LACI0F14598g	LAFE0E09384g	LADA0C02344g	LAFA0G09406g	LAMI0E02322g	SAKL0E05962g	KLTH0F09966g
L.A1	A1LA03-046410g	3	-	327	1951	LANO0G09428g	LAME0E05094g	ZYRO0A07546g	LAWA0G03862g	LACI0F14576g	LAFE0E09362g	LADA0C02366g	LAFA0G09428g	LAMI0E02300g	SAKL0E05984g	KLTH0F09988g
L.A1	A1LA03-046432g	3	-	328	1952	LANO0G09450g	LAME0E05116g	ZYRO0A07568g	LAWA0G03884g	LACI0F14554g	LAFE0E09340g	LADA0C02388g	LAFA0G09450g	LAMI0E02278g	SAKL0E06006g	KLTH0F10010g
L.A1	A1LA03-046454g	3	+	329	1953	LANO0G09472g	LAME0E05138g	ZYRO0A07590g	LAWA0G03906g	LACI0F14532g	LAFE0E09318g	LADA0C02410g	LAFA0G09472g	LAMI0E02256g	SAKL0E06028g	KLTH0F10032g
L.A1	A1LA03-046366g	3	-	330	1954	LANO0G09494g	LAME0E05160g	ZYRO0A07634g	LAWA0G03950g	LACI0F14488g	LAFE0E09296g	LADA0C02454g	LAFA0G09494g	LAMI0E02234g	SAKL0E05896g	KLTH0F10098g
L.A1	A1LA03-046344g	3	+	331	1955	LANO0G09516g	LAME0E05182g	ZYRO0A07656g	LAWA0G03972g	LACI0F14466g	LAFE0E09274g	LADA0C02476g	LAFA0G09516g	LAMI0E02212g	SAKL0E05874g	KLTH0F10120g
L.A1	A1LA03-046322g	3	-	332	1956	LANO0G09538g	LAME0E05204g	ZYRO0A07678g	LAWA0G03994g	LACI0F14444g	LAFE0E09252g	LADA0C02498g	LAFA0G09538g	LAMI0E02190g	SAKL0E05852g	KLTH0F10142g
L.A1	A1LA03-046300g	3	+	333	1957	LANO0G09560g	LAME0E05226g	ZYRO0A07700g	LAWA0G04016g	LACI0F14422g	LAFE0E09230g	LADA0C02520g	LAFA0G09560g	LAMI0E02168g	SAKL0E05830g	KLTH0F10164g
L.A1	A1LA03-046278g	3	-	334	1958	LANO0G09582g	LAME0E05248g	ZYRO0A07722g	LAWA0G04038g	LACI0F14400g	LAFE0E09208g	LADA0C02542g	LAFA0G09582g	LAMI0E02146g	SAKL0E05808g	KLTH0F10186g
L.A1	A1LA03-046256g	3	+	335	1959	LANO0G09604g	LAME0E05270g	ZYRO0A07744g	LAWA0G04060g	LACI0F14378g	LAFE0E09186g	LADA0C02564g	LAFA0G09604g	LAMI0E02124g	SAKL0E05786g	KLTH0F10208g
L.A1	A1LA03-046234g	3	-	336	1960	LANO0G09626g	LAME0E05292g	ZYRO0A07766g	LAWA0G04082g	LACI0F14356g	LAFE0E09164g	LADA0C02586g	LAFA0G09626g	LAMI0E02102g	SAKL0E05764g	KLTH0F10230g
L.A1	A1LA03-046212g	3	+	337	1961	LANO0G09648g	LAME0E05314g	ZYRO0A07788g	LAWA0G04104g	LACI0F14334g	LAFE0E09142g	LADA0C02608g	LAFA0G09648g	LAMI0E02080g	SAKL0E05720g	KLTH0F10252g
L.A1	A1LA03-046190g	3	-	338	1962	LANO0G09670g	LAME0E05336g	ZYRO0A07810g	LAWA0G04126g	LACI0F14312g	LAFE0E09120g	LADA0C02630g	LAFA0G09670g	LAMI0E02058g	SAKL0E05698g	KLTH0F10274g
L.A1	A1LA03-046168g	3	+	339	1963	LANO0G09692g	LAME0E05358g	ZYRO0A07854g	LAWA0G04148g	LACI0F14290g	LAFE0E09098g	LADA0C02652g	LAFA0G09692g	LAMI0E02036g	SAKL0E05676g	KLTH0F10296g
L.A1	A1LA03-046146g	3	-	340	1964	LANO0G09714g	LAME0E05380g	ZYRO0A07876g	LAWA0G04170g	LACI0F14268g	LAFE0E09076g	LADA0C02674g	LAFA0G09714g	LAMI0E02014g	SAKL0E05654g	KLTH0F10318g
L.A1	A1LA03-046124g	3	-	341	1965	LANO0G09736g	LAME0E05402g	ZYRO0A07898g	LAWA0G04192g	LACI0F14246g	LAFE0E09054g	LADA0C02696g	LAFA0G09736g	LAMI0E01992g	SAKL0E05632g	KLTH0F10340g
L.A1	A1LA03-046102g	3	+	342	1966	LANO0G18052g	LAME0A00848g	ZYRO0A07920g		LACI0F11122g	LAFE0D00738g	LADA0F00650g	LAFA0A07470g	LAMI0D13212g	SAKL0E05610g	KLTH0H16016g
L.A1	A1LA03-046080g	3	+	343	1967	LANO0G18030g	LAME0A00870g	ZYRO0A07942g	LAWA0H14092g	LACI0F11100g	LAFE0D00760g	LADA0F00672g	LAFA0A07448g	LAMI0D13168g	SAKL0E05588g	KLTH0H15994g
L.A1	A1LA03-046058g	3	-	344	1968	LANO0G18008g	LAME0A00892g	ZYRO0A07964g	LAWA0H14070g	LACI0F11078g	LAFE0D00782g	LADA0F00694g	LAFA0A07426g	LAMI0D13146g	SAKL0E05566g	KLTH0H15972g
L.A1	A1LA03-046036g	3	-	345	1969			ZYRO0A07986g	LAWA0H14048g	LACI0F11056g	LAFE0D00826g			LAMI0D13124g	SAKL0E05544g	KLTH0H15950g
L.A1	A1LA03-046014g	3	-	346	1970	LANO0G17986g	LAME0A00914g	ZYRO0A08008g	LAWA0H14004g	LACI0F11034g	LAFE0D00870g	LADA0F00716g	LAFA0A07404g	LAMI0D13102g	SAKL0E05522g	KLTH0H15906g
L.A1	A1LA03-045992g	3	+	347	1971			ZYRO0A08030g							SAKL0E05500g
L.A1	A1LA03-045970g	3	+	348	1972	LANO0G17964g	LAME0A00936g	ZYRO0A08052g	LAWA0H13982g	LACI0F11012g	LAFE0D00892g	LADA0F00738g	LAFA0A07382g	LAMI0D13080g	SAKL0E05478g	KLTH0H15884g
L.A1	A1LA03-045948g	3	-	349	1973	LANO0G17942g	LAME0A00958g	ZYRO0A08074g	LAWA0H13960g	LACI0F10990g	LAFE0D00914g	LADA0F00760g	LAFA0A07360g	LAMI0D13058g	SAKL0E05456g	KLTH0H15862g
L.A1	A1LA03-045926g	3	-	350	1974	LANO0G17920g	LAME0A00980g	ZYRO0A08118g	LAWA0H13938g	LACI0F10968g	LAFE0D00936g	LADA0F00782g	LAFA0A07316g	LAMI0D13036g	SAKL0E05434g	KLTH0H15840g
L.A1	A1LA03-045904g	3	-	351	1975	LANO0G17898g	LAME0A01024g	ZYRO0A08140g	LAWA0H13894g	LACI0F10924g	LAFE0D00980g	LADA0F00804g	LAFA0A07294g		SAKL0E05412g	KLTH0H15796g
L.A1	A1LA03-045882g	3	+	352	1976	LANO0G17876g	LAME0A01046g	ZYRO0A08162g	LAWA0H13872g	LACI0F10902g	LAFE0D01002g	LADA0F00826g	LAFA0A07272g	LAMI0D12970g	SAKL0E05390g	KLTH0H15774g
L.A1	A1LA03-045860g	3	+	353	1977	LANO0G17854g	LAME0A01068g	ZYRO0A08184g	LAWA0H13850g	LACI0F10880g	LAFE0D01024g	LADA0F00848g	LAFA0A07250g	LAMI0D12992g	SAKL0E05368g	KLTH0H15752g
L.A1	A1LA03-045816g	3	+	354	1978	LANO0G17832g	LAME0A01090g	ZYRO0A08228g	LAWA0H13806g	LACI0F10836g	LAFE0D01068g	LADA0F00870g	LAFA0A07228g	LAMI0D12948g	SAKL0E05302g	KLTH0H15708g
L.A1	A1LA03-045794g	3	+	355	1979			ZYRO0A08250g		LACI0F10814g	LAFE0D01090g				SAKL0E05170g
L.A1	A1LA03-045772g	3	+	356	1980	LANO0G17810g	LAME0A01112g	ZYRO0A08272g	LAWA0H13784g	LACI0F10792g	LAFE0D01112g	LADA0F00892g	LAFA0A07206g	LAMI0D12926g	SAKL0E05148g	KLTH0H15686g
L.A1	A1LA03-045750g	3	-	357	1981	LANO0G17788g	LAME0A01134g	ZYRO0A08294g	LAWA0H13762g	LACI0F10770g	LAFE0D01134g	LADA0F00914g	LAFA0A07184g	LAMI0D12904g	SAKL0E05126g	KLTH0H15664g
L.A1	A1LA03-045728g	3	-	358	1982	LANO0G17766g	LAME0A01156g	ZYRO0A08316g	LAWA0H13740g	LACI0F10748g	LAFE0D01156g	LADA0F00936g	LAFA0A07162g	LAMI0D12860g	SAKL0E05104g	KLTH0H15642g
L.A1	A1LA03-045706g	3	+	359	1983	LANO0G17744g	LAME0A01178g	ZYRO0A08338g	LAWA0H13718g	LACI0F10726g	LAFE0D01178g	LADA0F00958g	LAFA0A07140g	LAMI0D12838g	SAKL0E05082g	KLTH0H15620g
L.A1	A1LA03-045684g	3	-	360	1984	LANO0G17722g	LAME0A01200g	ZYRO0A08360g	LAWA0H13696g	LACI0F10704g	LAFE0D01200g	LADA0F00980g	LAFA0A07118g	LAMI0D12816g	SAKL0E05060g	KLTH0H15598g
L.A1	A1LA03-045662g	3	-	361	1985	LANO0G17700g	LAME0A01222g	ZYRO0A08382g	LAWA0H13674g	LACI0F10682g	LAFE0D01222g	LADA0F01002g	LAFA0A07096g	LAMI0D12794g	SAKL0E05038g	KLTH0H15576g
L.A1	A1LA03-045640g	3	-	362	1986	LANO0G17678g	LAME0A01244g	ZYRO0A08404g	LAWA0H13652g	LACI0F10660g	LAFE0D01244g	LADA0F01024g		LAMI0D12772g	SAKL0E05016g	KLTH0H15554g
L.A1	A1LA03-045596g	3	-	363	1987	LANO0E11650g	LAME0H06634g	ZYRO0A08426g	LAWA0D06458g	LACI0F10616g	LAFE0D01288g	LADA0D07360g	LAFA0E09362g	LAMI0B02520g	SAKL0E04972g	KLTH0E09702g
L.A1	A1LA03-045574g	3	-	364	1988	LANO0E11672g	LAME0H06612g	ZYRO0A08448g	LAWA0D06414g	LACI0F10594g	LAFE0D01310g	LADA0D07382g	LAFA0E09340g	LAMI0B02542g	SAKL0E04950g	KLTH0E09658g
L.A1	A1LA03-045530g	3	-	365	1989	LANO0H03026g	LAME0F17546g	ZYRO0A08470g	LAWA0D06370g	LACI0B01948g	LAFE0C10836g	LADA0E02432g	LAFA0F11122g	LAMI0G16490g	SAKL0E04928g	KLTH0E09614g
L.A1	A1LA03-045508g	3	-	366	1990	LANO0H03004g	LAME0F17568g	ZYRO0A08492g	LAWA0D06348g	LACI0B01970g	LAFE0C10814g	LADA0E02410g	LAFA0F11144g	LAMI0G16468g	SAKL0E04906g	KLTH0E09592g
L.A1	A1LA03-045486g	3	+	367	1991	LANO0H02982g	LAME0F17590g	ZYRO0A08514g	LAWA0D06326g	LACI0B01992g	LAFE0C10792g	LADA0E02388g	LAFA0F11166g	LAMI0G16446g	SAKL0E04884g	KLTH0E09570g
L.A1	A1LA03-045464g	3	-	368	1992	LANO0H02960g	LAME0F17612g	ZYRO0A08536g		LACI0B02014g	LAFE0C10770g	LADA0E02366g	LAFA0F11188g	LAMI0G16424g	SAKL0E04862g	KLTH0E09548g
L.A1	A1LA03-045442g	3	+	369	1993	LANO0H02938g	LAME0F17634g	ZYRO0A08558g	LAWA0D06282g	LACI0B02036g	LAFE0C10748g	LADA0E02344g	LAFA0F11210g	LAMI0G16380g	SAKL0E04840g	KLTH0E09504g
L.A1	A1LA03-045420g	3	-	370	1994	LANO0H02916g	LAME0F17656g	ZYRO0A08580g	LAWA0D06260g	LACI0B02058g	LAFE0C10726g	LADA0E02322g	LAFA0F11232g	LAMI0G16358g	SAKL0E04818g	KLTH0E09482g
L.A1	A1LA03-045376g	3	+	371	1995			ZYRO0A08624g							SAKL0E04796g
L.A1	A1LA03-045332g	3	+	372	1996	LANO0H02850g	LAME0F17722g	ZYRO0A08668g	LAWA0D06194g	LACI0B02124g	LAFE0C10660g	LADA0E02256g	LAFA0F11298g	LAMI0G16292g	SAKL0E04752g	KLTH0E09416g
L.A1	A1LA03-045310g	3	+	373	1997	LANO0H02828g	LAME0F17744g	ZYRO0A08690g	LAWA0D06172g	LACI0B02146g	LAFE0C10638g	LADA0E02234g	LAFA0F11320g	LAMI0G16270g	SAKL0E04741g	KLTH0E09394g
L.A1	A1LA03-045288g	3	+	374	1998	LANO0H02806g	LAME0F17766g	ZYRO0A08712g	LAWA0D06150g	LACI0B02168g	LAFE0C10616g	LADA0E02212g	LAFA0F11342g	LAMI0G16248g	SAKL0E04730g	KLTH0E09372g
L.A1	A1LA03-045266g	3	+	375	1999	LANO0H02784g	LAME0F17788g	ZYRO0A08734g	LAWA0D06128g	LACI0B02190g	LAFE0C10594g	LADA0E02190g	LAFA0F11364g	LAMI0G16226g	SAKL0E04708g	KLTH0E09350g
[truncated: 2,447 more rows]

## Sheet: L.A2
Ancestor	Ancest gene name	chr	strand	ID/chr	ID/genome	LANO	LAME	ZYRO	LAWA	LACI	LAFE	LADA	LAFA	LAMI	SAKL	KLTH
L.A2	A2LA01-110254g	1	-	1	1	LANO0B00474g	LAME0E13718g	ZYRO0G00396g	LAWA0D01398g	LACI0G00650g	LAFE0A00430g		LAFA0F06480g	LAMI0C03268g	SAKL0B12496g	KLTH0D17094g
L.A2	A2LA01-008042g	1	+	2	2	LANO0B00496g	LAME0E13696g	ZYRO0G00418g	LAWA0D01376g	LACI0G00672g	LAFE0A00452g	LADA0A08548g	LAFA0F06458g	LAMI0C03290g	SAKL0B12474g	KLTH0D17116g
L.A2	A2LA01-008020g	1	-	3	3	LANO0B00518g	LAME0E13674g	ZYRO0G00440g	LAWA0D01354g	LACI0G00694g	LAFE0A00474g	LADA0A08526g	LAFA0F06436g	LAMI0C03312g	SAKL0B12452g	KLTH0D17138g
L.A2	A2LA01-007998g	1	+	4	4	LANO0B00540g	LAME0E13652g	ZYRO0G00462g	LAWA0D01332g	LACI0G00716g	LAFE0A00496g	LADA0A08504g	LAFA0F06414g	LAMI0C03334g	SAKL0B12430g	KLTH0D17160g
L.A2	A2LA01-007976g	1	-	5	5	LANO0B00562g	LAME0E13630g	ZYRO0G00484g	LAWA0D01310g	LACI0G00738g	LAFE0A00518g	LADA0A08482g	LAFA0F06392g	LAMI0C03356g	SAKL0B12408g	KLTH0D17182g
L.A2	A2LA01-007954g	1	-	6	6	LANO0B00584g	LAME0E13608g	ZYRO0G00506g	LAWA0D01288g	LACI0G00760g	LAFE0A00540g	LADA0A08460g	LAFA0F06370g	LAMI0C03224g	SAKL0B12364g	KLTH0D17204g
L.A2	A2LA01-007932g	1	-	7	7	LANO0B00606g	LAME0E13586g	ZYRO0G00528g	LAWA0D01266g	LACI0G00782g	LAFE0A00562g	LADA0A08438g		LAMI0C03400g	SAKL0B12342g	KLTH0D17226g
L.A2	A2LA01-007910g	1	+	8	8	LANO0B00628g	LAME0E13564g	ZYRO0G00550g	LAWA0D01244g	LACI0G00804g	LAFE0A00584g	LADA0A08416g	LAFA0F06348g	LAMI0C03422g	SAKL0B12320g	KLTH0D17248g
L.A2	A2LA01-007888g	1	-	9	9	LANO0B00650g	LAME0E13542g	ZYRO0G00572g	LAWA0D01222g	LACI0G00826g	LAFE0A00606g	LADA0A08394g	LAFA0F06326g	LAMI0C03444g	SAKL0B12298g	KLTH0D17270g
L.A2	A2LA01-007866g	1	-	10	10	LANO0B00672g	LAME0E13520g	ZYRO0B08888g	LAWA0D01178g	LACI0G00848g	LAFE0A00650g	LADA0A08372g	LAFA0F06304g	LAMI0C03466g	SAKL0B12210g	KLTH0D17314g
L.A2	A2LA01-007844g	1	+	11	11	LANO0B00694g	LAME0E13498g	ZYRO0B08866g	LAWA0D01156g	LACI0G00870g	LAFE0A00672g	LADA0A08350g	LAFA0F06282g	LAMI0C03488g	SAKL0B12188g	KLTH0D17336g
L.A2	A2LA01-007822g	1	-	12	12	LANO0B00716g	LAME0E13476g	ZYRO0B08844g	LAWA0D01134g	LACI0G00892g	LAFE0A00694g	LADA0A08328g	LAFA0F06260g	LAMI0C03510g	SAKL0G18766g	KLTH0D17358g
L.A2	A2LA01-007800g	1	+	13	13	LANO0B00738g	LAME0E13454g	ZYRO0B08822g	LAWA0D01112g	LACI0G00914g	LAFE0A00716g	LADA0A08306g	LAFA0F06238g	LAMI0C03532g	SAKL0G18744g	KLTH0D17380g
L.A2	A2LA01-007778g	1	-	14	14	LANO0B00760g	LAME0E13432g	ZYRO0B08800g	LAWA0D01090g	LACI0G00936g	LAFE0A00738g	LADA0A08284g	LAFA0F06216g	LAMI0C03554g	SAKL0G18722g	KLTH0D17402g
L.A2	A2LA01-007756g	1	+	15	15	LANO0B00782g	LAME0E13410g	ZYRO0B08778g	LAWA0D01068g	LACI0G00958g	LAFE0A00760g	LADA0A08262g	LAFA0F06194g	LAMI0C03576g	SAKL0G18700g	KLTH0D17424g
L.A2	A2LA01-007734g	1	+	16	16	LANO0B00804g	LAME0E13388g	ZYRO0B08756g	LAWA0D01046g	LACI0G00980g	LAFE0A00782g	LADA0A08240g	LAFA0F06172g	LAMI0C03598g	SAKL0G18678g	KLTH0D17446g
L.A2	A2LA01-007712g	1	-	17	17	LANO0B00826g	LAME0E13366g	ZYRO0B08734g	LAWA0D01024g	LACI0G01002g	LAFE0A00804g	LADA0A08218g	LAFA0F06150g	LAMI0C03620g	SAKL0G18656g	KLTH0D17468g
L.A2	A2LA01-007690g	1	-	18	18	LANO0B00848g	LAME0E13344g	ZYRO0B08712g	LAWA0D01002g	LACI0G01024g	LAFE0A00826g	LADA0A08196g	LAFA0F06128g	LAMI0C03642g	SAKL0G18634g	KLTH0D17490g
L.A2	A2LA01-007668g	1	+	19	19	LANO0B00870g	LAME0G17942g	ZYRO0B08668g	LAWA0D00980g	LACI0G01046g	LAFE0A00848g	LADA0A08174g	LAFA0F10682g	LAMI0C03664g	SAKL0G18590g	KLTH0D17512g
L.A2	A2LA01-007646g	1	+	20	20	LANO0B00892g	LAME0G17920g	ZYRO0B08646g	LAWA0D00958g	LACI0G01068g	LAFE0A00870g	LADA0A08152g	LAFA0F10660g	LAMI0C03686g	SAKL0G18568g	KLTH0D17534g
L.A2	A2LA01-007624g	1	-	21	21	LANO0B00914g	LAME0G17898g		LAWA0D00936g	LACI0G01090g	LAFE0A00892g	LADA0A08130g	LAFA0F10638g	LAMI0C03708g	SAKL0G18546g	KLTH0D17556g
L.A2	A2LA01-007602g	1	+	22	22	LANO0B00936g	LAME0G17876g	ZYRO0B08624g	LAWA0D00914g	LACI0G01112g	LAFE0A00914g	LADA0A08108g	LAFA0F10616g	LAMI0C03730g	SAKL0G18524g	KLTH0D17578g
L.A2	A2LA01-007580g	1	-	23	23	LANO0B00958g	LAME0G17854g	ZYRO0B08602g	LAWA0D00892g	LACI0G01134g	LAFE0A00936g	LADA0A08086g	LAFA0F10594g	LAMI0C03752g	SAKL0G18502g	KLTH0D17600g
L.A2	A2LA01-007558g	1	+	24	24	LANO0B00980g	LAME0G17832g	ZYRO0B08690g	LAWA0D00870g	LACI0G01156g	LAFE0A00958g	LADA0A08064g	LAFA0F10572g	LAMI0C03774g	SAKL0G18480g	KLTH0D17622g
L.A2	A2LA01-007536g	1	-	25	25	LANO0B01002g	LAME0G17810g	ZYRO0B08558g	LAWA0D00848g	LACI0G01178g	LAFE0A00980g	LADA0A08042g	LAFA0F10550g	LAMI0C03796g	SAKL0G18458g	KLTH0D17644g
L.A2	A2LA01-007514g	1	+	26	26	LANO0B01024g	LAME0G17788g	ZYRO0B08536g	LAWA0D00804g	LACI0G01200g	LAFE0A01024g	LADA0A08020g	LAFA0F10528g	LAMI0C03818g	SAKL0G18414g	KLTH0D17688g
L.A2	A2LA01-007492g	1	-	27	27	LANO0B01046g	LAME0G17766g		LAWA0D00782g	LACI0G01222g	LAFE0A01046g	LADA0A07998g	LAFA0F10506g	LAMI0C03840g	SAKL0G18392g	KLTH0D17710g
L.A2	A2LA01-007470g	1	-	28	28	LANO0B01068g	LAME0G17744g	ZYRO0B08514g	LAWA0D00760g	LACI0G01244g	LAFE0A01068g	LADA0A07976g	LAFA0F10484g	LAMI0C03862g	SAKL0G18370g	KLTH0D17732g
L.A2	A2LA01-007448g	1	-	29	29	LANO0B01090g	LAME0G17722g	ZYRO0B08492g	LAWA0D00738g	LACI0G01266g	LAFE0A01090g	LADA0A07954g	LAFA0F10462g	LAMI0C01002g	SAKL0G18348g	KLTH0D17754g
L.A2	A2LA01-007426g	1	-	30	30	LANO0B01112g	LAME0G17700g		LAWA0D00716g	LACI0G01288g	LAFE0A01112g	LADA0A07932g	LAFA0F10440g	LAMI0C00980g	SAKL0G18326g	KLTH0D17776g
L.A2	A2LA01-007404g	1	-	31	31	LANO0B01134g	LAME0G17678g	ZYRO0B08448g	LAWA0D00694g	LACI0G01310g	LAFE0A01134g	LADA0A07910g	LAFA0F10418g	LAMI0C00958g	SAKL0G18304g	KLTH0D17798g
L.A2	A2LA01-007382g	1	+	32	32	LANO0B01156g	LAME0G17656g	ZYRO0B08426g	LAWA0D00650g	LACI0G01332g	LAFE0A01156g	LADA0A07888g	LAFA0F10396g	LAMI0C00936g	SAKL0G18260g	KLTH0D17842g
L.A2	A2LA01-007360g	1	-	33	33	LANO0B01178g	LAME0G17634g	ZYRO0B08404g	LAWA0D00628g	LACI0G01354g	LAFE0A01178g	LADA0A07866g	LAFA0F10374g	LAMI0C00914g	SAKL0G18238g	KLTH0D17864g
L.A2	A2LA01-007338g	1	+	34	34	LANO0B01200g	LAME0G17612g	ZYRO0B08382g	LAWA0D00606g	LACI0G01376g	LAFE0A01200g	LADA0A07844g	LAFA0F10352g	LAMI0C00892g	SAKL0G18216g	KLTH0D17886g
L.A2	A2LA01-007316g	1	-	35	35	LANO0B01222g	LAME0G17590g	ZYRO0B08360g	LAWA0D00584g	LACI0G01398g	LAFE0A01222g	LADA0A07822g	LAFA0F10330g	LAMI0C00870g	SAKL0G18194g	KLTH0D17908g
L.A2	A2LA01-007294g	1	+	36	36	LANO0B01244g	LAME0G17546g	ZYRO0B08338g	LAWA0D00562g	LACI0G01420g	LAFE0A01244g	LADA0A07800g	LAFA0F10286g	LAMI0C00848g	SAKL0G18172g	KLTH0D17930g
L.A2	A2LA01-007272g	1	-	37	37	LANO0B01266g	LAME0G17524g	ZYRO0B08316g	LAWA0D00540g	LACI0G01442g	LAFE0A01266g	LADA0A07778g	LAFA0F10264g	LAMI0C00826g	SAKL0G18150g	KLTH0D17952g
L.A2	A2LA01-007250g	1	+	38	38	LANO0B01288g	LAME0A04456g	ZYRO0B14960g	LAWA0D00518g	LACI0G01464g	LAFE0A01288g	LADA0A07756g	LAFA0A03928g	LAMI0G09142g	SAKL0G18128g	KLTH0D17974g
L.A2	A2LA01-007228g	1	+	39	39	LANO0B01310g	LAME0A04434g	ZYRO0B14916g	LAWA0D00496g	LACI0G01486g	LAFE0A01310g	LADA0A07734g	LAFA0A03950g	LAMI0G09164g	SAKL0G18106g	KLTH0D17996g
L.A2	A2LA01-007206g	1	+	40	40	LANO0B01332g	LAME0A04390g		LAWA0D00474g	LACI0G01530g	LAFE0A01332g	LADA0A07712g	LAFA0A03972g	LAMI0G09186g	SAKL0G18073g	KLTH0D18018g
L.A2	A2LA01-007184g	1	+	41	41	LANO0B01376g	LAME0A04368g	ZYRO0B14894g	LAWA0D00430g	LACI0G01552g	LAFE0A01354g	LADA0A07668g	LAFA0A04016g	LAMI0G09208g	SAKL0G18062g	KLTH0D18062g
L.A2	A2LA01-007162g	1	+	42	42	LANO0B01420g	LAME0A04346g	ZYRO0B14872g	LAWA0D00408g	LACI0G01574g	LAFE0A01376g	LADA0A07646g	LAFA0A04038g	LAMI0G09230g	SAKL0G18040g	KLTH0D18084g
L.A2	A2LA01-007140g	1	+	43	43	LANO0B01442g	LAME0A04324g	ZYRO0B14850g	LAWA0D00386g	LACI0G01596g	LAFE0A01398g	LADA0A07624g	LAFA0A04060g	LAMI0G09252g	SAKL0G18018g	KLTH0D18106g
L.A2	A2LA01-007118g	1	+	44	44	LANO0B01464g	LAME0A04302g	ZYRO0B14828g	LAWA0D00232g	LACI0G01618g	LAFE0A01420g	LADA0A07602g	LAFA0A05028g	LAMI0G09274g	SAKL0G17996g	KLTH0D18128g
L.A2	A2LA01-007096g	1	+	45	45	LANO0B01486g	LAME0A04280g	ZYRO0B14806g	LAWA0D01552g	LACI0G01640g	LAFE0A01442g	LADA0A07580g	LAFA0A05006g	LAMI0G09296g	SAKL0G17974g	KLTH0D16918g
L.A2	A2LA01-007074g	1	+	46	46	LANO0B01508g	LAME0A04258g	ZYRO0B14784g	LAWA0D01574g	LACI0G01662g	LAFE0A01464g	LADA0A07558g	LAFA0A04984g	LAMI0G09318g	SAKL0G17952g	KLTH0D16896g
L.A2	A2LA01-007052g	1	+	47	47	LANO0B01530g	LAME0A04236g	ZYRO0B14740g	LAWA0D01596g	LACI0G01684g	LAFE0A01486g	LADA0A07536g	LAFA0A04962g	LAMI0G09340g	SAKL0G17930g	KLTH0D16874g
L.A2	A2LA01-007030g	1	-	48	48	LANO0B01552g	LAME0A04214g	ZYRO0B14718g	LAWA0D01618g	LACI0G01706g	LAFE0A01508g	LADA0A07514g	LAFA0A04940g	LAMI0G09362g	SAKL0G17908g	KLTH0D16852g
L.A2	A2LA01-007008g	1	-	49	49	LANO0B01618g	LAME0A04192g	ZYRO0B14696g	LAWA0D01662g	LACI0G01750g	LAFE0A01552g	LADA0A07492g	LAFA0A04918g	LAMI0G09384g	SAKL0G17886g	KLTH0D16808g
L.A2	A2LA01-006986g	1	-	50	50	LANO0B01640g	LAME0A04170g	ZYRO0B14674g	LAWA0D01684g	LACI0G01772g	LAFE0A01574g	LADA0A07470g	LAFA0A04896g	LAMI0G09406g	SAKL0G17864g	KLTH0D16764g
L.A2	A2LA01-099386g	1	-	51	51	LANO0G13608g	LAME0E09230g	ZYRO0B14652g	LAWA0D01750g	LACI0G01794g	LAFE0A01596g	LADA0H15016g	LAFA0G13542g	LAMI0G09428g	SAKL0G17842g	KLTH0D16698g
L.A2	A2LA01-099364g	1	-	52	52	LANO0G13586g	LAME0E09208g	ZYRO0B14630g	LAWA0D01772g	LACI0G01816g	LAFE0A01618g	LADA0H14994g	LAFA0G13520g	LAMI0G09450g	SAKL0G17820g	KLTH0D16808g
L.A2	A2LA01-099342g	1	-	53	53	LANO0G13564g	LAME0E09186g	ZYRO0B14586g	LAWA0D01794g	LACI0G01838g	LAFE0A01640g	LADA0H14972g	LAFA0G13498g	LAMI0G09472g	SAKL0G17798g	KLTH0D16632g
L.A2	A2LA01-099320g	1	+	54	54	LANO0G13542g	LAME0E09164g	ZYRO0B14564g	LAWA0D01816g	LACI0G01860g	LAFE0A01662g	LADA0H14950g	LAFA0G13476g	LAMI0H00958g	SAKL0G17776g	KLTH0D16610g
L.A2	A2LA01-099298g	1	-	55	55	LANO0G13520g	LAME0E09142g		LAWA0D01838g	LACI0G01882g	LAFE0A01684g	LADA0H14928g	LAFA0G13454g		SAKL0G17754g	KLTH0D16588g
L.A2	A2LA01-099276g	1	+	56	56	LANO0G13498g	LAME0E09120g	ZYRO0B14542g	LAWA0D01860g	LACI0G01904g	LAFE0A01706g	LADA0H14906g	LAFA0G13432g	LAMI0H00980g	SAKL0G17732g	KLTH0D16566g
L.A2	A2LA01-099254g	1	+	57	57	LANO0G13476g	LAME0E09098g		LAWA0D01882g	LACI0G01926g	LAFE0A01728g	LADA0H14884g		LAMI0H01002g		KLTH0D16544g
L.A2	A2LA01-099232g	1	-	58	58	LANO0G13454g	LAME0E09076g	ZYRO0B14520g		LACI0G01948g	LAFE0A01750g	LADA0H14862g	LAFA0G13410g	LAMI0H01046g	SAKL0G17710g	KLTH0D16522g
L.A2	A2LA01-099210g	1	-	59	59	LANO0G13410g	LAME0E09032g			LACI0G01970g	LAFE0A01772g	LADA0H14840g	LAFA0G13366g	LAMI0H01068g	SAKL0G17666g	KLTH0D16500g
L.A2	A2LA01-099188g	1	+	60	60	LANO0G13388g	LAME0E08988g	ZYRO0B14476g	LAWA0D01904g	LACI0G02014g	LAFE0A01860g	LADA0H14796g	LAFA0G13344g		SAKL0G17622g	KLTH0D16456g
L.A2	A2LA01-099166g	1	+	61	61	LANO0G13366g	LAME0E08966g	ZYRO0B14454g	LAWA0D01926g	LACI0G02036g	LAFE0A01882g	LADA0H14774g	LAFA0G13322g	LAMI0H01090g	SAKL0G17600g	KLTH0D16434g
L.A2	A2LA01-099144g	1	+	62	62	LANO0G13344g	LAME0E08944g	ZYRO0B14432g		LACI0G02058g	LAFE0A01904g	LADA0H14752g	LAFA0G13300g	LAMI0H01112g	SAKL0G17578g	KLTH0D16412g
L.A2	A2LA01-099122g	1	+	63	63	LANO0G13322g	LAME0E08922g	ZYRO0B14410g	LAWA0D01970g	LACI0G02080g	LAFE0A01926g	LADA0H14730g	LAFA0G13278g	LAMI0H01134g	SAKL0G17556g	KLTH0D16390g
L.A2	A2LA01-099100g	1	-	64	64	LANO0G13300g	LAME0E08900g	ZYRO0B14366g	LAWA0D02014g	LACI0G02124g	LAFE0A01970g	LADA0H14708g	LAFA0G13256g		SAKL0G17534g	KLTH0D16346g
L.A2	A2LA01-099078g	1	-	65	65	LANO0G13278g	LAME0E08878g	ZYRO0B14344g	LAWA0D02036g	LACI0G02146g	LAFE0A01992g	LADA0H14686g	LAFA0G13234g	LAMI0H01178g	SAKL0G17512g	KLTH0D16324g
L.A2	A2LA01-099056g	1	-	66	66	LANO0G13256g	LAME0E08856g	ZYRO0B14322g	LAWA0D02058g	LACI0G02168g	LAFE0A02014g	LADA0H14664g	LAFA0G13212g	LAMI0H01200g	SAKL0G17490g	KLTH0D16302g
L.A2	A2LA01-099034g	1	-	67	67	LANO0G13234g	LAME0E08834g	ZYRO0B14300g	LAWA0D02080g	LACI0G02190g	LAFE0A02036g	LADA0H14642g	LAFA0G13190g	LAMI0H01222g	SAKL0G17468g	KLTH0D16280g
L.A2	A2LA01-099012g	1	+	68	68	LANO0G13212g	LAME0E08812g	ZYRO0B14278g	LAWA0D02102g	LACI0G02212g	LAFE0A02058g	LADA0H14620g	LAFA0G13168g	LAMI0H01244g	SAKL0G17446g	KLTH0D16258g
L.A2	A2LA01-098990g	1	-	69	69	LANO0G13190g	LAME0E08790g	ZYRO0B14256g	LAWA0D02124g	LACI0G02234g	LAFE0A02080g	LADA0H14598g	LAFA0G13146g	LAMI0H01266g	SAKL0G17424g	KLTH0D16236g
L.A2	A2LA01-098968g	1	+	70	70	LANO0G13168g	LAME0E08768g	ZYRO0B14234g	LAWA0D02146g	LACI0G02256g	LAFE0A02102g	LADA0H14576g	LAFA0G13124g	LAMI0H01288g	SAKL0G17402g	KLTH0D16214g
L.A2	A2LA01-098946g	1	-	71	71	LANO0G13146g	LAME0E08746g	ZYRO0B14212g	LAWA0D02168g	LACI0G02278g	LAFE0A02124g	LADA0H14554g	LAFA0G13102g	LAMI0H01310g	SAKL0G17380g	KLTH0D16192g
L.A2	A2LA01-098924g	1	+	72	72	LANO0G13124g	LAME0E08724g	ZYRO0B14190g	LAWA0D02190g	LACI0G02300g	LAFE0A02146g	LADA0H14532g	LAFA0G13080g	LAMI0H01332g	SAKL0G17358g	KLTH0D16170g
L.A2	A2LA01-098902g	1	-	73	73	LANO0G13102g	LAME0E08702g	ZYRO0B14168g		LACI0G02322g	LAFE0A02168g	LADA0H14510g	LAFA0G13058g	LAMI0H01354g	SAKL0G17336g	KLTH0D16148g
L.A2	A2LA01-098880g	1	+	74	74	LANO0G13080g	LAME0E08680g	ZYRO0B14146g	LAWA0D02234g	LACI0G02344g	LAFE0A02190g	LADA0H14488g	LAFA0G13036g	LAMI0H01376g	SAKL0G17314g	KLTH0D16126g
L.A2	A2LA01-098858g	1	-	75	75	LANO0G13058g	LAME0E08658g	ZYRO0B14124g	LAWA0D02256g	LACI0G02366g	LAFE0A02212g	LADA0H14466g	LAFA0G13014g	LAMI0H01398g	SAKL0G17292g	KLTH0D16104g
L.A2	A2LA01-098836g	1	+	76	76	LANO0G13036g	LAME0E08636g	ZYRO0B14102g		LACI0G02388g	LAFE0A02234g	LADA0H14444g	LAFA0G12992g	LAMI0H01420g	SAKL0G17270g	KLTH0D16082g
L.A2	A2LA01-098814g	1	-	77	77	LANO0G13014g	LAME0E08614g	ZYRO0B14080g	LAWA0D02300g	LACI0G02410g	LAFE0A02256g	LADA0H14422g	LAFA0G12970g	LAMI0H01442g	SAKL0G17248g	KLTH0D16060g
L.A2	A2LA01-098770g	1	-	78	78	LANO0G12970g	LAME0E08570g	ZYRO0B14058g	LAWA0D02388g	LACI0G02454g	LAFE0A02300g	LADA0H14378g	LAFA0G12926g	LAMI0H01486g	SAKL0G17182g	KLTH0D16038g
L.A2	A2LA01-098748g	1	+	79	79	LANO0G12926g	LAME0E08548g	ZYRO0B14014g	LAWA0D02410g	LACI0G02476g	LAFE0A02366g	LADA0H14356g	LAFA0G12860g	LAMI0H01508g	SAKL0G17160g	KLTH0D16016g
L.A2	A2LA01-098726g	1	+	80	80	LANO0G12904g	LAME0E08526g	ZYRO0B13992g	LAWA0D02432g	LACI0G02498g	LAFE0A02388g	LADA0H14334g	LAFA0G12838g	LAMI0H01530g	SAKL0G17138g	KLTH0D15994g
L.A2	A2LA01-098704g	1	-	81	81	LANO0G12882g	LAME0E08504g	ZYRO0B13970g	LAWA0D02454g	LACI0G02520g	LAFE0A02410g	LADA0H14312g	LAFA0G12816g	LAMI0H01552g	SAKL0G17116g	KLTH0D15972g
L.A2	A2LA01-098682g	1	+	82	82	LANO0G12860g	LAME0E08482g	ZYRO0B13948g	LAWA0D02476g	LACI0G02542g	LAFE0A02432g	LADA0H14290g	LAFA0G12794g	LAMI0H01574g	SAKL0G17094g	KLTH0D15950g
L.A2	A2LA01-098660g	1	-	83	83	LANO0G12838g	LAME0E08460g	ZYRO0B13904g	LAWA0D02498g	LACI0G02564g	LAFE0A02454g	LADA0H14268g	LAFA0G12772g	LAMI0H01596g	SAKL0G17050g	KLTH0D15906g
L.A2	A2LA01-098638g	1	+	84	84	LANO0G12816g	LAME0E08438g	ZYRO0B13882g	LAWA0D02520g	LACI0G02586g	LAFE0A02476g	LADA0H14246g	LAFA0G12750g	LAMI0H01618g	SAKL0G17006g	KLTH0D15884g
L.A2	A2LA01-098616g	1	-	85	85	LANO0G12794g	LAME0E08416g	ZYRO0B13860g	LAWA0D02542g	LACI0G02608g	LAFE0A02498g	LADA0H14224g	LAFA0G12728g	LAMI0H01640g	SAKL0G16984g	KLTH0D15862g
L.A2	A2LA01-098594g	1	-	86	86	LANO0G12772g	LAME0E08394g	ZYRO0B13838g	LAWA0D02564g	LACI0G02630g	LAFE0A02520g	LADA0H14202g	LAFA0G12706g	LAMI0H01662g	SAKL0G16962g	KLTH0D15840g
L.A2	A2LA01-098572g	1	-	87	87	LANO0G12750g	LAME0E08372g	ZYRO0B13816g	LAWA0D02586g	LACI0G02652g	LAFE0A02542g	LADA0H14180g	LAFA0G12684g	LAMI0H01684g	SAKL0G16940g	KLTH0D15818g
L.A2	A2LA01-098550g	1	+	88	88	LANO0G12728g	LAME0E08350g	ZYRO0B13794g	LAWA0D02608g	LACI0G02674g	LAFE0A02564g	LADA0H14158g	LAFA0G12662g	LAMI0H01706g	SAKL0G16918g	KLTH0D15796g
L.A2	A2LA01-098528g	1	-	89	89	LANO0G12706g	LAME0E08328g	ZYRO0B13772g	LAWA0D02630g	LACI0G02696g	LAFE0A02586g	LADA0H14136g	LAFA0G12640g	LAMI0H01728g	SAKL0G16896g	KLTH0D15774g
L.A2	A2LA01-098506g	1	-	90	90	LANO0G12684g	LAME0E08306g	ZYRO0B13750g		LACI0G02718g	LAFE0A02608g	LADA0H14114g	LAFA0G12618g	LAMI0H01750g	SAKL0G16874g	KLTH0D15752g
L.A2	A2LA01-098484g	1	-	91	91	LANO0G12662g	LAME0E08284g	ZYRO0B13684g	LAWA0D02696g	LACI0G02762g	LAFE0A02674g	LADA0H14070g	LAFA0G12596g	LAMI0H01794g	SAKL0G16786g	KLTH0D15708g
L.A2	A2LA01-098462g	1	+	92	92	LANO0G12640g	LAME0E08262g	ZYRO0B13662g	LAWA0D02718g	LACI0G02784g	LAFE0A02696g	LADA0H14048g	LAFA0G12376g	LAMI0H01816g	SAKL0G16764g	KLTH0D15686g
L.A2	A2LA01-098440g	1	-	93	93	LANO0G12618g	LAME0E08240g	ZYRO0B13640g	LAWA0D02740g	LACI0G02806g	LAFE0A02718g	LADA0H14026g	LAFA0G12398g	LAMI0H01838g	SAKL0G16742g	KLTH0D15664g
L.A2	A2LA01-098418g	1	+	94	94	LANO0G12596g	LAME0E08218g	ZYRO0B13618g		LACI0G02828g	LAFE0A02740g	LADA0H14004g	LAFA0G12420g	LAMI0H01860g	SAKL0G16720g	KLTH0D15642g
L.A2	A2LA01-098396g	1	-	95	95	LANO0G12574g	LAME0E08196g	ZYRO0B13596g	LAWA0D02784g	LACI0G02850g	LAFE0A02762g	LADA0H13982g	LAFA0G12442g	LAMI0H01882g	SAKL0G16698g	KLTH0D15620g
L.A2	A2LA01-098352g	1	-	96	96	LANO0G12530g	LAME0E08152g	ZYRO0B13574g		LACI0G02894g	LAFE0A02806g	LADA0H13938g	LAFA0G12464g	LAMI0H01926g	SAKL0G16654g	KLTH0D15576g
L.A2	A2LA01-098330g	1	-	97	97	LANO0G12508g	LAME0E08130g	ZYRO0B13552g	LAWA0D02872g	LACI0G02916g	LAFE0A02828g	LADA0H13916g	LAFA0G12486g	LAMI0H01948g	SAKL0G16632g	KLTH0D15554g
L.A2	A2LA01-098308g	1	-	98	98	LANO0G12486g	LAME0E08108g	ZYRO0B13530g	LAWA0D02894g	LACI0G02938g	LAFE0A02850g	LADA0H13828g	LAFA0G12508g	LAMI0H01970g	SAKL0G16610g	KLTH0D15532g
L.A2	A2LA01-098286g	1	-	99	99	LANO0G12464g	LAME0E08086g	ZYRO0B13508g	LAWA0D02916g	LACI0G02960g	LAFE0A02872g	LADA0H13806g	LAFA0G12574g	LAMI0H01992g	SAKL0G16588g	KLTH0D15510g
L.A2	A2LA01-098264g	1	+	100	100	LANO0G12442g	LAME0E08064g	ZYRO0B13486g	LAWA0D02938g	LACI0G02982g	LAFE0A02894g	LADA0H13784g	LAFA0G12354g	LAMI0H02014g	SAKL0G16555g	KLTH0D15477g
L.A2	A2LA01-098242g	1	-	101	101	LANO0G12420g	LAME0E08042g	ZYRO0B13464g	LAWA0D02960g	LACI0G03004g	LAFE0A02916g	LADA0H13762g	LAFA0G12332g	LAMI0H02036g	SAKL0G16522g	KLTH0D15444g
L.A2	A2LA01-098220g	1	+	102	102	LANO0G12398g	LAME0E08020g	ZYRO0B13442g	LAWA0D02982g	LACI0G03026g	LAFE0A02938g	LADA0H13740g	LAFA0G12310g	LAMI0H02058g	SAKL0G16500g	KLTH0D15422g
L.A2	A2LA01-098198g	1	+	103	103	LANO0G12376g	LAME0E07998g	ZYRO0B13420g	LAWA0D03004g	LACI0G03048g	LAFE0A02960g	LADA0H13718g	LAFA0G12288g	LAMI0H02080g	SAKL0G16478g	KLTH0D15400g
L.A2	A2LA01-000144g	1	-	104	104	LANO0G12354g	LAME0E07976g	ZYRO0B13398g	LAWA0D03026g	LACI0G03070g	LAFE0A02982g			LAMI0H02102g	SAKL0G16456g	KLTH0D15378g
L.A2	A2LA01-098176g	1	-	105	105	LANO0G12332g	LAME0E07954g	ZYRO0B13332g	LAWA0D03048g	LACI0G03092g	LAFE0A03004g	LADA0H13696g	LAFA0G12266g	LAMI0A01508g	SAKL0G16412g	KLTH0D15356g
L.A2	A2LA01-106734g	1	+	106	106	LANO0H18756g	LAME0F07580g	ZYRO0B13354g	LAWA0D03070g	LACI0G03114g	LAFE0A03026g	LADA0E12508g	LAFA0D09230g	LAMI0A01530g	SAKL0G16390g	KLTH0D15334g
L.A2	A2LA01-022232g	1	+	107	107	LANO0G11452g	LAME0E07052g	ZYRO0B13310g	LAWA0G06018g	LACI0G03136g	LAFE0E08724g	LADA0C04390g	LAFA0G11364g	LAMI0A01552g	SAKL0G16324g	KLTH0D15290g
L.A2	A2LA01-022254g	1	-	108	108	LANO0G11474g	LAME0E07074g	ZYRO0B13288g	LAWA0G06040g	LACI0G03158g	LAFE0E08702g	LADA0C04412g	LAFA0G11386g	LAMI0A01574g	SAKL0G16302g	KLTH0D15268g
L.A2	A2LA01-022276g	1	-	109	109	LANO0G11496g	LAME0E07096g	ZYRO0B13222g	LAWA0G06084g	LACI0G03180g	LAFE0E08680g	LADA0C04434g	LAFA0G11408g	LAMI0A01596g	SAKL0G16280g	KLTH0D15246g
L.A2	A2LA01-097362g	1	+	110	110	LANO0G11518g	LAME0E07118g	ZYRO0B13200g		LACI0G03202g	LAFE0E08658g	LADA0H12882g	LAFA0G11452g	LAMI0A01618g	SAKL0G16258g	KLTH0D15224g
L.A2	A2LA01-097384g	1	-	111	111	LANO0G11540g	LAME0E07140g		LAWA0G05930g	LACI0G03224g	LAFE0E08636g	LADA0H12904g	LAFA0G11474g	LAMI0A01640g	SAKL0G16236g	KLTH0D15202g
L.A2	A2LA01-097406g	1	-	112	112	LANO0G11562g	LAME0E07162g	ZYRO0B13156g	LAWA0G06172g	LACI0G03246g	LAFE0E08614g	LADA0H12926g	LAFA0G11496g	LAMI0A01662g	SAKL0G16214g	KLTH0D15158g
L.A2	A2LA01-097428g	1	+	113	113	LANO0G11584g	LAME0E07184g	ZYRO0B13134g	LAWA0G06194g	LACI0G03268g	LAFE0E08592g	LADA0H12948g	LAFA0G11518g	LAMI0A01684g	SAKL0G16192g	KLTH0D15136g
L.A2	A2LA01-097450g	1	+	114	114	LANO0G11606g	LAME0E07206g	ZYRO0B13112g	LAWA0G06216g	LACI0G03290g	LAFE0E08570g	LADA0H12970g	LAFA0G11540g	LAMI0A01706g	SAKL0G16170g	KLTH0D15114g
L.A2	A2LA01-097472g	1	+	115	115	LANO0G11628g	LAME0E07228g	ZYRO0B13090g	LAWA0G06238g	LACI0G03312g	LAFE0E08548g	LADA0H12992g	LAFA0G11562g	LAMI0A01728g	SAKL0G16148g	KLTH0D15092g
L.A2	A2LA01-097494g	1	+	116	116	LANO0G11650g	LAME0E07250g	ZYRO0B13068g	LAWA0G06260g	LACI0G03356g	LAFE0E08482g	LADA0H13014g	LAFA0G11584g	LAMI0A01750g	SAKL0G16104g	KLTH0D15070g
L.A2	A2LA01-097516g	1	-	117	117	LANO0G11672g	LAME0E07272g	ZYRO0B13046g	LAWA0G06282g	LACI0G03378g	LAFE0E08460g	LADA0H13036g	LAFA0G11606g	LAMI0A01772g	SAKL0G16082g	KLTH0D15048g
L.A2	A2LA01-097538g	1	+	118	118	LANO0G11694g	LAME0E07294g	ZYRO0B13024g	LAWA0G06304g	LACI0G03400g	LAFE0E08438g	LADA0H13058g	LAFA0G11628g	LAMI0A01794g	SAKL0G16060g	KLTH0D15026g
L.A2	A2LA01-097560g	1	-	119	119	LANO0G11716g	LAME0E07316g		LAWA0G06326g	LACI0G03422g	LAFE0E08416g	LADA0H13080g	LAFA0G11650g	LAMI0A01816g	SAKL0G16038g	KLTH0D15004g
L.A2	A2LA01-097582g	1	-	120	120	LANO0G11738g	LAME0E07338g	ZYRO0B13002g	LAWA0G06348g	LACI0G03444g	LAFE0E08394g	LADA0H13102g	LAFA0G11672g	LAMI0A01838g	SAKL0G16016g	KLTH0D14982g
L.A2	A2LA01-097604g	1	+	121	121	LANO0G11760g	LAME0E07360g	ZYRO0B12980g	LAWA0G06370g	LACI0G03466g	LAFE0E08372g	LADA0H13124g	LAFA0G11694g	LAMI0A01882g	SAKL0G15994g	KLTH0D14960g
L.A2	A2LA01-097626g	1	-	122	122	LANO0G11782g	LAME0E07382g	ZYRO0B12958g	LAWA0G06392g	LACI0G03488g	LAFE0E08350g	LADA0H13146g	LAFA0G11716g	LAMI0A01904g	SAKL0G15972g	KLTH0D14938g
L.A2	A2LA01-097648g	1	+	123	123	LANO0G11804g	LAME0E07404g	ZYRO0B12936g	LAWA0G06414g	LACI0G03510g	LAFE0E08328g	LADA0H13168g	LAFA0G11738g	LAMI0A01926g	SAKL0G15950g	KLTH0D14916g
L.A2	A2LA01-097670g	1	-	124	124	LANO0G11826g	LAME0E07426g	ZYRO0B12914g	LAWA0G06436g	LACI0G03532g	LAFE0E08306g	LADA0H13190g	LAFA0G11760g	LAMI0A01948g	SAKL0G15928g	KLTH0D14894g
L.A2	A2LA01-097692g	1	-	125	125	LANO0G11848g	LAME0E07448g	ZYRO0B12892g		LACI0G03554g	LAFE0E08284g	LADA0H13212g	LAFA0G11782g	LAMI0A01970g	SAKL0G15906g	KLTH0D14872g
L.A2	A2LA01-097714g	1	+	126	126	LANO0G11870g	LAME0E07470g	ZYRO0B12870g	LAWA0G06502g	LACI0G03576g	LAFE0E08262g	LADA0H13234g	LAFA0G11804g	LAMI0A01992g	SAKL0G15884g	KLTH0D14850g
L.A2	A2LA01-097736g	1	-	127	127	LANO0G11892g	LAME0E07492g	ZYRO0B12826g		LACI0G03598g	LAFE0E08240g	LADA0H13256g	LAFA0G11826g	LAMI0A02014g	SAKL0G15840g	KLTH0D14806g
L.A2	A2LA01-097758g	1	-	128	128	LANO0G11914g	LAME0E07514g	ZYRO0B12804g	LAWA0G06480g	LACI0G03620g	LAFE0E08218g	LADA0H13278g	LAFA0G11848g	LAMI0A02036g	SAKL0G15818g	KLTH0D14784g
L.A2	A2LA01-097780g	1	+	129	129	LANO0G11936g	LAME0E07536g	ZYRO0B12782g		LACI0G03642g	LAFE0E08196g	LADA0H13300g	LAFA0G11870g	LAMI0A02058g	SAKL0G15796g	KLTH0D14762g
L.A2	A2LA01-097802g	1	-	130	130	LANO0G11958g	LAME0E07558g	ZYRO0B12760g	LAWA0G06568g	LACI0G03664g	LAFE0E08174g	LADA0H13322g	LAFA0G11892g	LAMI0A02080g	SAKL0G15774g	KLTH0D14740g
L.A2	A2LA01-097824g	1	-	131	131	LANO0G11980g	LAME0E07580g	ZYRO0B12738g	LAWA0G06590g	LACI0G03686g	LAFE0E08152g	LADA0H13344g	LAFA0G11914g	LAMI0A02102g	SAKL0G15752g	KLTH0D14718g
L.A2	A2LA01-097846g	1	+	132	132	LANO0G12002g	LAME0E07602g	ZYRO0B12716g	LAWA0G06612g	LACI0G03708g	LAFE0E08130g	LADA0H13366g	LAFA0G11936g	LAMI0A02124g	SAKL0G15730g	KLTH0D14696g
L.A2	A2LA01-097868g	1	-	133	133	LANO0G12024g	LAME0E07646g	ZYRO0B12694g	LAWA0G06634g	LACI0G03730g	LAFE0E08108g	LADA0H13388g	LAFA0G11958g	LAMI0A02146g	SAKL0G15708g	KLTH0D14674g
L.A2	A2LA01-097890g	1	+	134	134	LANO0G12046g	LAME0E07668g	ZYRO0B12672g	LAWA0G06656g	LACI0G03752g	LAFE0E08086g	LADA0H13410g	LAFA0G11980g	LAMI0A02168g	SAKL0G15686g	KLTH0D14652g
L.A2	A2LA01-097912g	1	+	135	135	LANO0G12068g	LAME0E07690g	ZYRO0B12650g	LAWA0G06678g	LACI0G03774g	LAFE0E08064g	LADA0H13432g	LAFA0G12002g	LAMI0A02190g	SAKL0H02706g	KLTH0D14630g
L.A2	A2LA01-097934g	1	-	136	136	LANO0G12090g	LAME0E07712g	ZYRO0B12628g	LAWA0G06700g	LACI0G03796g	LAFE0E08042g	LADA0H13454g	LAFA0G12024g	LAMI0A02212g	SAKL0H02728g	KLTH0D14608g
L.A2	A2LA01-097956g	1	+	137	137	LANO0G12112g	LAME0E07734g	ZYRO0B12606g	LAWA0G06722g	LACI0G03818g	LAFE0E08020g	LADA0H13476g	LAFA0G12046g	LAMI0A02234g	SAKL0H02750g	KLTH0D14586g
L.A2	A2LA01-097978g	1	+	138	138	LANO0G12134g	LAME0E07756g	ZYRO0B12584g	LAWA0G06744g	LACI0G03840g	LAFE0E07998g	LADA0H13498g	LAFA0G12068g	LAMI0A02256g	SAKL0H02772g	KLTH0D14564g
L.A2	A2LA01-098000g	1	-	139	139	LANO0G12156g	LAME0E07778g	ZYRO0B12562g	LAWA0G06766g	LACI0G03862g	LAFE0E07976g	LADA0H13520g	LAFA0G12090g	LAMI0A02278g	SAKL0H02794g	KLTH0D14520g
L.A2	A2LA01-098022g	1	+	140	140	LANO0G12178g	LAME0E07800g	ZYRO0B12540g	LAWA0G06788g	LACI0G03884g	LAFE0E07954g	LADA0H13542g	LAFA0G12112g	LAMI0A02300g	SAKL0H02816g	KLTH0D14498g
L.A2	A2LA01-098044g	1	+	141	141	LANO0G12200g	LAME0E07822g	ZYRO0B12496g	LAWA0G06810g	LACI0G03906g	LAFE0E07932g	LADA0H13564g	LAFA0G12134g	LAMI0A02344g	SAKL0H02860g	KLTH0D14476g
L.A2	A2LA01-098066g	1	-	142	142	LANO0G12222g	LAME0E07844g		LAWA0G06832g	LACI0G03928g	LAFE0E07910g	LADA0H13586g	LAFA0G12156g		SAKL0H02959g	KLTH0D14454g
L.A2	A2LA01-098088g	1	-	143	143	LANO0G12244g	LAME0E07866g	ZYRO0B12474g	LAWA0G06854g	LACI0G03950g	LAFE0E07888g	LADA0H13608g	LAFA0G12178g	LAMI0A02388g	SAKL0H02970g	KLTH0D14432g
L.A2	A2LA01-098110g	1	+	144	144	LANO0G12266g	LAME0E07888g	ZYRO0B12452g	LAWA0G06876g	LACI0G03972g	LAFE0E07866g	LADA0H13630g	LAFA0G12200g	LAMI0A02410g	SAKL0H02992g	KLTH0D14410g
L.A2	A2LA01-098132g	1	-	145	145	LANO0G12288g	LAME0E07910g	ZYRO0B12430g	LAWA0G06898g	LACI0G03994g	LAFE0E07844g	LADA0H13652g	LAFA0G12222g	LAMI0A02432g	SAKL0H03014g	KLTH0D14388g
L.A2	A2LA01-098154g	1	-	146	146	LANO0G12310g	LAME0E07932g	ZYRO0B12408g	LAWA0G06920g	LACI0G04016g	LAFE0E07822g	LADA0H13674g	LAFA0G12244g	LAMI0A02454g	SAKL0H03036g	KLTH0D14366g
L.A2	A2LA01-053758g	1	+	147	147	LANO0H18734g	LAME0F07558g	ZYRO0B12386g	LAWA0G06942g	LACI0G04038g	LAFE0E07800g	LADA0E12486g	LAFA0D09252g	LAMI0A02476g	SAKL0H03058g	KLTH0D14344g
L.A2	A2LA01-053736g	1	-	148	148	LANO0H18712g	LAME0F07536g	ZYRO0B12364g	LAWA0G06964g	LACI0G04060g	LAFE0E07778g	LADA0E12464g	LAFA0D09274g	LAMI0A02498g	SAKL0H03080g	KLTH0D14322g
L.A2	A2LA01-053714g	1	-	149	149	LANO0H18690g	LAME0F07514g		LAWA0G06986g	LACI0G04082g	LAFE0E07756g	LADA0E12442g	LAFA0D09296g	LAMI0A02520g	SAKL0H03102g	KLTH0D14300g
L.A2	A2LA01-053692g	1	+	150	150	LANO0H18668g	LAME0F07492g	ZYRO0B12320g	LAWA0G07008g	LACI0G04104g	LAFE0E07734g	LADA0E12420g	LAFA0D09318g	LAMI0A02542g	SAKL0H03124g	KLTH0D14278g
L.A2	A2LA01-053670g	1	-	151	151	LANO0H18646g	LAME0F07470g	ZYRO0B12298g	LAWA0G07030g	LACI0G04126g	LAFE0E07712g	LADA0E12398g	LAFA0D09340g	LAMI0A02564g	SAKL0H03146g	KLTH0D14256g
L.A2	A2LA01-053648g	1	+	152	152	LANO0H18624g	LAME0F07448g	ZYRO0B12276g	LAWA0G07052g	LACI0G04148g	LAFE0E07690g	LADA0E12376g	LAFA0D09362g	LAMI0A02586g	SAKL0H03168g	KLTH0D14234g
L.A2	A2LA01-053626g	1	+	153	153	LANO0H18602g	LAME0F07426g	ZYRO0B12254g	LAWA0E13938g	LACI0G04170g	LAFE0E07668g	LADA0E12354g	LAFA0D09384g	LAMI0A02608g	SAKL0H03190g	KLTH0D14212g
L.A2	A2LA01-053604g	1	-	154	154	LANO0H18580g	LAME0F07404g	ZYRO0B12232g	LAWA0E13916g	LACI0G04192g	LAFE0E07646g	LADA0E12332g	LAFA0D09406g	LAMI0A02630g	SAKL0H03212g	KLTH0D14190g
L.A2	A2LA01-053582g	1	+	155	155	LANO0H18558g	LAME0F07382g	ZYRO0B12210g	LAWA0E13894g	LACI0G04214g	LAFE0E07624g	LADA0E12310g	LAFA0D09428g	LAMI0A02652g	SAKL0H03234g	KLTH0D14168g
L.A2	A2LA01-053560g	1	+	156	156	LANO0H18536g	LAME0F07360g	ZYRO0B12188g	LAWA0E13872g	LACI0G04236g	LAFE0E07602g	LADA0E12288g	LAFA0D09450g	LAMI0A02674g	SAKL0H03256g	KLTH0D14146g
L.A2	A2LA01-053538g	1	-	157	157	LANO0H18514g	LAME0F07338g	ZYRO0B12166g	LAWA0E13850g	LACI0G04258g	LAFE0E07580g	LADA0E12266g	LAFA0D09472g	LAMI0A02696g	SAKL0H03278g	KLTH0D14124g
L.A2	A2LA01-053516g	1	+	158	158	LANO0H18492g	LAME0F07316g	ZYRO0B12144g		LACI0G04280g	LAFE0E07558g	LADA0E12244g	LAFA0D09494g	LAMI0A02718g	SAKL0H03300g	KLTH0D14102g
L.A2	A2LA01-053494g	1	-	159	159	LANO0H18470g	LAME0F07294g	ZYRO0B12122g	LAWA0E13806g	LACI0G04302g	LAFE0E07536g	LADA0E12222g	LAFA0D09516g	LAMI0A02740g	SAKL0H03322g	KLTH0D14080g
L.A2	A2LA01-053472g	1	+	160	160	LANO0H18448g	LAME0F07272g	ZYRO0B12100g	LAWA0E13784g	LACI0G04324g	LAFE0E07514g	LADA0E12200g	LAFA0D09538g	LAMI0A02762g	SAKL0H03344g	KLTH0D14058g
L.A2	A2LA01-053450g	1	-	161	161	LANO0H18426g	LAME0F07250g	ZYRO0B12078g		LACI0G04346g	LAFE0E07492g	LADA0E12178g	LAFA0D09560g	LAMI0A02784g	SAKL0H03366g	KLTH0D14036g
L.A2	A2LA01-053428g	1	-	162	162	LANO0H18404g	LAME0F07228g	ZYRO0B12056g	LAWA0E13762g	LACI0G04368g	LAFE0E07470g	LADA0E12156g	LAFA0D09582g	LAMI0A02806g	SAKL0H03388g	KLTH0D14014g
L.A2	A2LA01-053406g	1	+	163	163	LANO0H18382g	LAME0F07206g	ZYRO0B07106g	LAWA0E13740g	LACI0G04390g	LAFE0E07448g	LADA0E12134g	LAFA0D09604g	LAMI0A02828g	SAKL0H03410g	KLTH0D13992g
L.A2	A2LA01-053384g	1	+	164	164	LANO0H18360g	LAME0F07184g	ZYRO0B07128g	LAWA0E13718g	LACI0G04412g	LAFE0E07426g	LADA0E12112g	LAFA0D09626g	LAMI0A02850g	SAKL0H03432g	KLTH0D13970g
L.A2	A2LA01-053362g	1	-	165	165	LANO0H18338g	LAME0F07162g	ZYRO0B07150g	LAWA0E13696g	LACI0G04434g	LAFE0E07404g	LADA0E12090g	LAFA0D09648g	LAMI0A02872g	SAKL0H03454g	KLTH0D13948g
L.A2	A2LA01-053340g	1	-	166	166	LANO0H18316g	LAME0F07140g		LAWA0E13674g	LACI0G04456g	LAFE0E07360g	LADA0E12068g	LAFA0D09670g	LAMI0A02894g	SAKL0H03476g	KLTH0D13926g
L.A2	A2LA01-053318g	1	-	167	167	LANO0H18294g	LAME0F07118g	ZYRO0B07238g	LAWA0E13630g	LACI0G04500g	LAFE0E07316g	LADA0E12046g	LAFA0D09692g	LAMI0A02916g	SAKL0H03696g	KLTH0D13860g
L.A2	A2LA01-052900g	1	-	168	168	LANO0H18272g	LAME0F07096g	ZYRO0B07260g	LAWA0E13608g	LACI0G04522g	LAFE0E07294g	LADA0E11562g	LAFA0D09714g	LAMI0A02938g	SAKL0H03718g	KLTH0D13838g
L.A2	A2LA01-052922g	1	-	169	169	LANO0H18250g	LAME0F07074g	ZYRO0B07282g	LAWA0E13586g	LACI0G04544g	LAFE0E07272g	LADA0E11584g	LAFA0D09736g	LAMI0A02960g	SAKL0H03729g	KLTH0D13816g
L.A2	A2LA01-052944g	1	+	170	170	LANO0H18228g	LAME0F07052g	ZYRO0B07304g	LAWA0E13564g	LACI0G04566g	LAFE0E07250g	LADA0E11628g	LAFA0D09758g	LAMI0A03004g	SAKL0H03740g	KLTH0D13794g
L.A2	A2LA01-052966g	1	-	171	171	LANO0H18206g	LAME0F07030g	ZYRO0B07326g	LAWA0E13542g	LACI0G04588g	LAFE0E07228g	LADA0E11650g	LAFA0D09780g	LAMI0A03026g	SAKL0H03762g	KLTH0D13772g
L.A2	A2LA01-052988g	1	+	172	172	LANO0H18162g	LAME0F07008g	ZYRO0B07348g	LAWA0E13498g	LACI0G04610g	LAFE0E07206g	LADA0E11716g	LAFA0D09802g	LAMI0A03048g	SAKL0H03806g	KLTH0D13728g
L.A2	A2LA01-053010g	1	+	173	173	LANO0H18140g	LAME0F06986g	ZYRO0B07370g	LAWA0E13476g	LACI0G04632g	LAFE0E07184g	LADA0E11738g	LAFA0D09824g	LAMI0A03070g	SAKL0H03828g	KLTH0D13706g
L.A2	A2LA01-053032g	1	-	174	174	LANO0H18118g	LAME0F06964g	ZYRO0B07392g	LAWA0E13454g	LACI0G04654g	LAFE0E07162g	LADA0E11760g	LAFA0D09846g	LAMI0A03092g	SAKL0H03850g	KLTH0D13684g
L.A2	A2LA01-053142g	1	+	175	175	LANO0H18184g	LAME0F06942g	ZYRO0B07414g	LAWA0E13432g	LACI0G04676g	LAFE0E07140g	LADA0E11870g	LAFA0D09868g	LAMI0A03334g	SAKL0H03872g	KLTH0D13640g
L.A2	A2LA01-104094g	1	-	176	176	LANO0H18052g	LAME0F02322g	ZYRO0B07436g	LAWA0E13410g	LACI0G04698g	LAFE0E07118g		LAFA0D09890g	LAMI0A03158g	SAKL0H03894g	KLTH0D13618g
L.A2	A2LA01-053120g	1	-	177	177	LANO0H18030g	LAME0F02300g	ZYRO0B07458g	LAWA0E13388g	LACI0G04742g	LAFE0E07096g	LADA0E11848g	LAFA0D09912g	LAMI0A03180g	SAKL0H03938g	KLTH0D13596g
L.A2	A2LA01-053098g	1	-	178	178	LANO0H18008g	LAME0F02278g	ZYRO0B07480g	LAWA0E13366g	LACI0G04764g	LAFE0E07074g	LADA0E11826g	LAFA0D09934g	LAMI0A03202g	SAKL0H03960g	KLTH0D13574g
L.A2	A2LA01-053076g	1	+	179	179	LANO0H17986g	LAME0F02256g	ZYRO0B07502g	LAWA0E13344g	LACI0G04786g	LAFE0E07052g	LADA0E11804g	LAFA0D09956g	LAMI0A03224g	SAKL0H03982g	KLTH0D13552g
L.A2	A2LA01-053054g	1	-	180	180	LANO0H17964g	LAME0F02234g	ZYRO0B07524g		LACI0G04808g	LAFE0E07030g	LADA0E11782g	LAFA0D09978g	LAMI0A03246g	SAKL0H04004g	KLTH0D13530g
L.A2	A2LA01-075274g	1	-	181	181	LANO0H17942g	LAME0F02212g	ZYRO0B07546g	LAWA0E13300g	LACI0G04830g	LAFE0E07008g	LADA0G05578g	LAFA0D10000g	LAMI0A03268g	SAKL0H04026g	KLTH0D13508g
L.A2	A2LA01-075252g	1	+	182	182	LANO0H17920g	LAME0F02190g		LAWA0E13278g	LACI0G04852g	LAFE0E06986g	LADA0G05556g	LAFA0D10022g	LAMI0A03290g	SAKL0H04048g	KLTH0D13486g
L.A2	A2LA01-075230g	1	-	183	183	LANO0H17898g	LAME0F02168g	ZYRO0B07590g	LAWA0E13256g	LACI0G04764g	LAFE0E06942g	LADA0G05534g	LAFA0D10044g	LAMI0A03334g	SAKL0H04092g	KLTH0D13464g
L.A2	A2LA01-075208g	1	+	184	184	LANO0H17876g	LAME0F02146g	ZYRO0B07612g	LAWA0E13234g	LACI0G04918g	LAFE0E06920g	LADA0G05512g	LAFA0D10066g	LAMI0A03356g	SAKL0H04114g	KLTH0D13442g
L.A2	A2LA01-075186g	1	-	185	185	LANO0H17854g	LAME0F02124g	ZYRO0B07634g	LAWA0E13212g	LACI0G04940g	LAFE0E06898g	LADA0G05490g	LAFA0D10088g	LAMI0A03378g	SAKL0H04136g	KLTH0D13420g
L.A2	A2LA01-075164g	1	+	186	186	LANO0H17832g	LAME0F02102g	ZYRO0B07656g	LAWA0E13190g	LACI0G04962g	LAFE0E06876g	LADA0G05468g	LAFA0D10110g	LAMI0A03400g	SAKL0H04158g	KLTH0D13398g
L.A2	A2LA01-075142g	1	+	187	187	LANO0H17810g	LAME0F02080g	ZYRO0B07678g	LAWA0E13168g	LACI0G04984g	LAFE0E06854g	LADA0G05446g	LAFA0D10132g	LAMI0A03422g	SAKL0H04180g	KLTH0D13376g
L.A2	A2LA01-075120g	1	-	188	188	LANO0H17788g	LAME0F02058g	ZYRO0B07700g	LAWA0E13146g	LACI0G05006g	LAFE0E06832g	LADA0G05424g	LAFA0D10154g	LAMI0A03444g	SAKL0H04202g	KLTH0D13354g
L.A2	A2LA01-075098g	1	+	189	189	LANO0H17766g	LAME0F02036g	ZYRO0B07722g	LAWA0E13124g	LACI0G05028g	LAFE0E06810g	LADA0G05402g	LAFA0D10176g	LAMI0A03466g	SAKL0H04224g	KLTH0D13332g
L.A2	A2LA01-075076g	1	-	190	190	LANO0H17744g	LAME0F02014g	ZYRO0B07744g	LAWA0E13102g	LACI0G05050g	LAFE0E06788g	LADA0G05380g	LAFA0D10198g	LAMI0A03488g	SAKL0H04246g	KLTH0D13310g
L.A2	A2LA01-075054g	1	+	191	191	LANO0H17722g	LAME0F01992g	ZYRO0B07766g	LAWA0E13058g	LACI0G05072g	LAFE0E06766g	LADA0G05336g	LAFA0D10220g	LAMI0A03510g	SAKL0H04268g	KLTH0D13288g
L.A2	A2LA01-075032g	1	-	192	192	LANO0H17700g	LAME0F01970g	ZYRO0B07832g	LAWA0E13036g	LACI0G05094g	LAFE0E06744g	LADA0G05292g	LAFA0D10242g	LAMI0A03532g	SAKL0H04334g	KLTH0D13244g
L.A2	A2LA01-075010g	1	-	193	193	LANO0H17678g	LAME0F01948g	ZYRO0G15862g	LAWA0E13014g	LACI0G05116g	LAFE0E06722g	LADA0G05270g	LAFA0D10264g	LAMI0A03554g	SAKL0H04356g	KLTH0D13222g
L.A2	A2LA01-074988g	1	+	194	194	LANO0H17656g	LAME0F01926g	ZYRO0G15686g	LAWA0E12992g	LACI0G05138g	LAFE0E06700g	LADA0G05248g	LAFA0D10286g	LAMI0A03576g	SAKL0H04378g	KLTH0D13200g
L.A2	A2LA01-074966g	1	-	195	195	LANO0H17634g	LAME0F01904g	ZYRO0G15708g	LAWA0E12970g	LACI0G05160g	LAFE0E06678g	LADA0G05226g	LAFA0D10308g	LAMI0A03598g	SAKL0H04400g	KLTH0D13178g
L.A2	A2LA01-074944g	1	+	196	196	LANO0H17612g	LAME0F01882g	ZYRO0G15730g	LAWA0E12926g	LACI0G05182g	LAFE0E06656g	LADA0G05204g	LAFA0D10330g	LAMI0A03642g	SAKL0H04422g	KLTH0D13156g
L.A2	A2LA01-074922g	1	-	197	197	LANO0H17568g	LAME0F01838g	ZYRO0G15752g	LAWA0E12882g	LACI0G05204g	LAFE0E06634g	LADA0G05160g	LAFA0D10374g	LAMI0A03686g	SAKL0H04466g	KLTH0D13112g
L.A2	A2LA01-074900g	1	+	198	198	LANO0H17546g	LAME0F01816g	ZYRO0G15774g	LAWA0E12860g	LACI0G05226g	LAFE0E06612g	LADA0G05138g	LAFA0D10396g	LAMI0A03708g	SAKL0H04488g	KLTH0D13090g
L.A2	A2LA01-074878g	1	-	199	199	LANO0H17524g	LAME0F01794g		LAWA0E12838g	LACI0G05248g	LAFE0E06590g	LADA0G05116g	LAFA0D10418g	LAMI0A03730g	SAKL0H04510g	KLTH0D13068g
L.A2	A2LA01-074856g	1	+	200	200	LANO0H17502g	LAME0F01772g	ZYRO0G15796g	LAWA0E12816g	LACI0G05270g	LAFE0E06568g	LADA0G05094g	LAFA0D10440g	LAMI0A03752g	SAKL0H04532g	KLTH0D13046g
L.A2	A2LA01-074834g	1	-	201	201	LANO0H17480g	LAME0F01750g	ZYRO0A05742g	LAWA0E12772g	LACI0G05292g	LAFE0E06546g	LADA0G05072g	LAFA0D10462g	LAMI0A03774g	SAKL0H04730g	KLTH0D13002g
L.A2	A2LA01-023002g	1	-	202	202	LANO0H17458g	LAME0H05116g	ZYRO0A05764g	LAWA0E12728g	LACI0G05314g	LAFE0E06524g	LADA0C05182g	LAFA0E07888g	LAMI0A03796g	SAKL0H04796g	KLTH0D12958g
L.A2	A2LA01-023024g	1	+	203	203	LANO0H17436g	LAME0H05138g	ZYRO0A05786g	LAWA0E12464g	LACI0G05336g	LAFE0E06502g	LADA0C05204g	LAFA0E07910g	LAMI0A03818g	SAKL0H04818g	KLTH0D12936g
L.A2	A2LA01-023046g	1	+	204	204	LANO0H17414g	LAME0H05160g	ZYRO0A05808g	LAWA0E12486g	LACI0G05358g	LAFE0E06480g	LADA0C05226g	LAFA0E07932g	LAMI0A03840g	SAKL0H04840g	KLTH0D12914g
L.A2	A2LA01-023068g	1	+	205	205	LANO0H17392g	LAME0H05182g	ZYRO0A05830g	LAWA0E12530g	LACI0G05380g	LAFE0E06458g	LADA0C05248g	LAFA0E07954g	LAMI0A03862g	SAKL0H04862g	KLTH0D12892g
L.A2	A2LA01-023090g	1	-	206	206	LANO0H17370g	LAME0H05204g	ZYRO0A05852g	LAWA0E12552g	LACI0G05402g	LAFE0E06436g	LADA0C05270g	LAFA0E07976g	LAMI0A03884g	SAKL0H04884g	KLTH0D12870g
L.A2	A2LA01-023112g	1	-	207	207	LANO0H17348g	LAME0H05226g	ZYRO0A05874g	LAWA0E12596g	LACI0G05424g	LAFE0E06414g	LADA0C05292g	LAFA0E07998g	LAMI0A03906g	SAKL0H04906g	KLTH0D12848g
L.A2	A2LA01-023134g	1	-	208	208	LANO0H17326g	LAME0H05248g	ZYRO0A05896g	LAWA0E12640g	LACI0G05446g	LAFE0E06392g	LADA0C05314g	LAFA0E08020g	LAMI0A03928g	SAKL0H04928g	KLTH0D12826g
L.A2	A2LA01-023156g	1	+	209	209	LANO0H17304g	LAME0H05270g	ZYRO0A05918g	LAWA0E12662g	LACI0G05468g	LAFE0E06370g	LADA0C05336g	LAFA0E08042g	LAMI0A03950g	SAKL0H04950g	KLTH0D12804g
L.A2	A2LA01-023178g	1	+	210	210	LANO0H17282g	LAME0H05292g	ZYRO0A05940g	LAWA0E12684g	LACI0G05490g	LAFE0E06348g	LADA0C05358g	LAFA0E08064g	LAMI0A03972g	SAKL0H04972g	KLTH0D12782g
L.A2	A2LA01-023200g	1	-	211	211	LANO0H17260g	LAME0H05314g	ZYRO0A05962g	LAWA0E12706g	LACI0G05512g	LAFE0E06326g	LADA0C05380g	LAFA0E08086g	LAMI0A03994g	SAKL0H04994g	KLTH0D12760g
L.A2	A2LA01-023222g	1	+	212	212	LANO0H17238g	LAME0C04544g	ZYRO0A06006g	LAWA0E12442g	LACI0G05534g	LAFE0E06304g	LADA0C05402g	LAFA0B04214g	LAMI0A04016g	SAKL0H05016g	KLTH0D12738g
L.A2	A2LA01-023244g	1	+	213	213	LANO0H17216g	LAME0C04566g	ZYRO0A06028g	LAWA0E12398g	LACI0G05556g	LAFE0E06282g	LADA0C05424g	LAFA0B04236g	LAMI0A04038g	SAKL0H05038g	KLTH0D12716g
L.A2	A2LA01-023266g	1	+	214	214	LANO0H17194g	LAME0C04588g		LAWA0E12376g	LACI0G05578g	LAFE0E06260g	LADA0C05446g	LAFA0B04258g	LAMI0A04060g	SAKL0H05060g	KLTH0D12694g
L.A2	A2LA01-023288g	1	-	215	215	LANO0H17172g	LAME0C04610g	ZYRO0A06072g	LAWA0E12354g	LACI0G05600g	LAFE0E06238g	LADA0C05468g	LAFA0B04280g	LAMI0A04082g	SAKL0H05082g	KLTH0D12672g
L.A2	A2LA01-023310g	1	+	216	216	LANO0H17128g	LAME0C04654g	ZYRO0A06116g	LAWA0E12310g	LACI0G05644g	LAFE0E06194g	LADA0C05534g	LAFA0B04324g	LAMI0A04148g	SAKL0H05126g	KLTH0D12628g
L.A2	A2LA01-023332g	1	-	217	217	LANO0H17106g	LAME0C04676g	ZYRO0A06138g	LAWA0E12288g	LACI0G05666g	LAFE0E06172g	LADA0C05556g	LAFA0B04346g	LAMI0A04170g	SAKL0H05148g	KLTH0D12606g
L.A2	A2LA01-023354g	1	-	218	218	LANO0H17084g	LAME0C04698g	ZYRO0A06160g	LAWA0E12134g	LACI0G05688g	LAFE0E06150g	LADA0C05578g	LAFA0B04368g	LAMI0A04192g	SAKL0H05170g	KLTH0D12584g
L.A2	A2LA01-023376g	1	+	219	219	LANO0H17062g	LAME0C04720g		LAWA0E12112g	LACI0G05710g	LAFE0E06128g	LADA0C05600g	LAFA0B04390g	LAMI0A04258g	SAKL0H05192g	KLTH0D12540g
L.A2	A2LA01-023398g	1	+	220	220	LANO0H17040g	LAME0C04742g	ZYRO0A06182g	LAWA0E12090g	LACI0G05732g	LAFE0E06106g	LADA0C05622g	LAFA0B04412g	LAMI0A04280g	SAKL0H05214g	KLTH0D12518g
L.A2	A2LA01-023420g	1	-	221	221	LANO0H17018g	LAME0C04764g	ZYRO0A06226g	LAWA0E12068g	LACI0G05776g	LAFE0E06062g	LADA0C05666g	LAFA0B04434g	LAMI0A04302g	SAKL0H05258g	KLTH0D12496g
L.A2	A2LA01-023442g	1	-	222	222	LANO0H16996g	LAME0C04786g	ZYRO0A06248g	LAWA0E12046g	LACI0G05798g	LAFE0E06040g	LADA0C05688g	LAFA0B04456g	LAMI0A04324g	SAKL0H05280g	KLTH0D12474g
L.A2	A2LA01-023464g	1	-	223	223	LANO0H16974g	LAME0C04808g	ZYRO0F09526g	LAWA0E12024g	LACI0G05820g	LAFE0E06018g	LADA0C05710g	LAFA0B04478g	LAMI0A04346g	SAKL0H05302g	KLTH0D12452g
L.A2	A2LA01-023486g	1	+	224	224	LANO0H16952g	LAME0C04830g	ZYRO0F09504g	LAWA0E12002g	LACI0G05842g	LAFE0E05996g	LADA0C05732g	LAFA0B04500g	LAMI0A04368g	SAKL0H05324g	KLTH0D12430g
L.A2	A2LA01-023508g	1	+	225	225	LANO0H16930g	LAME0C04852g	ZYRO0F09482g	LAWA0E11980g	LACI0G05864g	LAFE0E05974g	LADA0C05754g	LAFA0B04522g	LAMI0A04390g	SAKL0H05346g	KLTH0D12408g
L.A2	A2LA01-023530g	1	-	226	226	LANO0H16908g	LAME0C04874g	ZYRO0F09460g	LAWA0E11958g	LACI0G05886g	LAFE0E05952g	LADA0C05776g	LAFA0B04544g	LAMI0A04412g	SAKL0H05368g	KLTH0D12386g
L.A2	A2LA01-023552g	1	-	227	227	LANO0H16886g	LAME0C04896g	ZYRO0F09438g	LAWA0E11936g	LACI0G05908g	LAFE0E05930g	LADA0C05798g	LAFA0B04566g	LAMI0A04434g	SAKL0H05390g	KLTH0D12364g
L.A2	A2LA01-106316g	1	+	228	228	LANO0H16864g	LAME0C04940g		LAWA0E11892g	LACI0G05930g	LAFE0E05908g		LAFA0B04632g	LAMI0A04456g	SAKL0H05412g	KLTH0D12320g
L.A2	A2LA01-023574g	1	+	229	229	LANO0H16842g	LAME0C04962g	ZYRO0F09394g	LAWA0E11870g	LACI0G05952g	LAFE0E05886g	LADA0C05842g	LAFA0B04654g		SAKL0H05434g	KLTH0D12298g
L.A2	A2LA01-023596g	1	-	230	230	LANO0H16820g	LAME0C04984g	ZYRO0F09372g	LAWA0E11848g	LACI0G05974g	LAFE0E05864g	LADA0C05864g	LAFA0B04676g	LAMI0A04478g	SAKL0H05456g	KLTH0D12276g
L.A2	A2LA01-023618g	1	+	231	231	LANO0H16798g	LAME0H02806g	ZYRO0F09350g	LAWA0E11826g	LACI0G05996g	LAFE0E05842g	LADA0C05886g	LAFA0B04698g	LAMI0A04500g	SAKL0H05478g	KLTH0D12254g
L.A2	A2LA01-023640g	1	-	232	232	LANO0H16776g	LAME0H02784g	ZYRO0F09328g	LAWA0E11804g	LACI0G06018g	LAFE0E05820g	LADA0C05908g	LAFA0B04720g	LAMI0A04522g	SAKL0H05500g	KLTH0D12232g
L.A2	A2LA01-023662g	1	+	233	233	LANO0H16754g	LAME0H02762g	ZYRO0F09306g	LAWA0E11782g	LACI0G06040g	LAFE0E05798g	LADA0C05930g	LAFA0B04742g	LAMI0A04544g	SAKL0H05544g	KLTH0D12210g
L.A2	A2LA01-023684g	1	-	234	234	LANO0H16732g	LAME0H02740g	ZYRO0F09284g	LAWA0E11760g	LACI0G06062g	LAFE0E05776g	LADA0C05952g	LAFA0B04764g		SAKL0H05566g	KLTH0D12188g
L.A2	A2LA01-023706g	1	+	235	235	LANO0H16710g	LAME0H02718g	ZYRO0F12122g	LAWA0E11738g	LACI0G06084g	LAFE0E05754g	LADA0C05974g	LAFA0B04786g	LAMI0A04566g	SAKL0H05588g	KLTH0D12166g
L.A2	A2LA01-023728g	1	-	236	236	LANO0H16688g	LAME0H02696g	ZYRO0F12100g	LAWA0E11716g	LACI0G06106g	LAFE0E05732g	LADA0C05996g	LAFA0B04808g	LAMI0A04588g	SAKL0H05610g	KLTH0D12144g
L.A2	A2LA01-023750g	1	-	237	237	LANO0H16666g	LAME0H02674g	ZYRO0F12078g	LAWA0E11694g	LACI0G06128g	LAFE0G07800g	LADA0C06018g	LAFA0B04830g	LAMI0A04610g	SAKL0H05632g	KLTH0D12122g
L.A2	A2LA01-023772g	1	-	238	238	LANO0H16644g	LAME0H02652g		LAWA0E11672g	LACI0G06150g	LAFE0G07822g	LADA0C06040g	LAFA0B04852g	LAMI0A04632g	SAKL0H05654g	KLTH0D12100g
L.A2	A2LA01-023794g	1	-	239	239	LANO0H16622g	LAME0H02630g	ZYRO0F12034g	LAWA0E11650g	LACI0G06172g	LAFE0G07844g	LADA0C06062g	LAFA0B04874g	LAMI0A04654g	SAKL0H05676g	KLTH0D12078g
L.A2	A2LA01-023816g	1	+	240	240	LANO0H16600g	LAME0H02608g	ZYRO0F12012g	LAWA0E11628g	LACI0G06194g	LAFE0G07866g	LADA0C06084g	LAFA0B04896g	LAMI0A04676g	SAKL0H05698g	KLTH0D12056g
L.A2	A2LA01-023838g	1	+	241	241	LANO0H16578g	LAME0H02586g	ZYRO0F11990g	LAWA0E11606g	LACI0G06216g	LAFE0G07888g	LADA0C06106g	LAFA0B04918g	LAMI0F03598g	SAKL0H05720g	KLTH0D12034g
L.A2	A2LA01-023860g	1	-	242	242	LANO0H16556g	LAME0H02564g	ZYRO0F11968g	LAWA0E11584g	LACI0G06238g	LAFE0G07910g	LADA0C06128g	LAFA0B04940g	LAMI0F03620g	SAKL0H05786g	KLTH0D12012g
L.A2	A2LA01-023882g	1	+	243	243	LANO0H16534g	LAME0H02542g	ZYRO0F11946g	LAWA0E11562g	LACI0G06260g	LAFE0G07932g	LADA0C06150g	LAFA0B04962g	LAMI0F03642g	SAKL0H05764g	KLTH0D11990g
L.A2	A2LA01-023926g	1	-	244	244	LANO0H16490g	LAME0H02498g	ZYRO0F11902g	LAWA0E11540g	LACI0G06282g	LAFE0G07954g	LADA0C06194g	LAFA0B05006g	LAMI0F03686g	SAKL0H05808g	KLTH0D11946g
L.A2	A2LA01-023948g	1	-	245	245	LANO0H16468g	LAME0H02476g	ZYRO0F11880g	LAWA0E11518g	LACI0G06304g	LAFE0G07976g	LADA0C06216g	LAFA0B05028g	LAMI0F03708g	SAKL0H05830g	KLTH0D11924g
L.A2	A2LA01-023970g	1	+	246	246	LANO0H16446g	LAME0H02454g	ZYRO0F11858g	LAWA0E11496g	LACI0G06326g	LAFE0G07998g	LADA0C06238g	LAFA0B05050g		SAKL0H05852g	KLTH0D11902g
L.A2	A2LA01-023992g	1	-	247	247	LANO0H16424g	LAME0H02432g	ZYRO0F11836g	LAWA0E11474g	LACI0G06348g	LAFE0G08020g	LADA0C06260g	LAFA0B05072g	LAMI0F03730g	SAKL0H05874g	KLTH0D11880g
L.A2	A2LA01-024014g	1	+	248	248	LANO0H16402g	LAME0H02410g	ZYRO0F11814g	LAWA0E11452g	LACI0G06370g	LAFE0G08042g	LADA0C06282g	LAFA0B05094g	LAMI0F03752g	SAKL0H05896g	KLTH0D11858g
L.A2	A2LA01-024036g	1	+	249	249	LANO0H16380g	LAME0H02388g	ZYRO0D11000g	LAWA0E11430g	LACI0G06392g	LAFE0G08064g	LADA0C06304g	LAFA0B05138g	LAMI0F03774g	SAKL0H05918g	KLTH0D11836g
L.A2	A2LA01-024058g	1	-	250	250	LANO0H16358g	LAME0H02366g	ZYRO0D10978g	LAWA0E11408g	LACI0G06414g	LAFE0G08086g	LADA0C06326g	LAFA0B05160g	LAMI0F03796g	SAKL0H05940g	KLTH0D11814g
L.A2	A2LA01-024080g	1	-	251	251	LANO0H16336g	LAME0H02344g	ZYRO0D10956g	LAWA0E11386g	LACI0G06436g	LAFE0G08108g	LADA0C06348g	LAFA0B05182g	LAMI0F03818g	SAKL0H05962g	KLTH0D11792g
L.A2	A2LA01-024102g	1	+	252	252	LANO0H16314g	LAME0H02520g	ZYRO0D10934g	LAWA0E11364g	LACI0G06458g	LAFE0G08130g	LADA0C06370g	LAFA0B05204g	LAMI0F03840g	SAKL0H05984g	KLTH0D11770g
L.A2	A2LA01-024124g	1	-	253	253	LANO0H16292g	LAME0H02300g	ZYRO0D10912g	LAWA0E11342g	LACI0G06480g	LAFE0G08152g	LADA0C06392g	LAFA0B05226g	LAMI0F03862g	SAKL0H06006g	KLTH0D11748g
L.A2	A2LA01-024146g	1	+	254	254	LANO0H16270g	LAME0H02278g	ZYRO0F07810g	LAWA0E11320g	LACI0G06502g	LAFE0G08174g	LADA0C06414g	LAFA0B05248g	LAMI0F03884g	SAKL0H06028g	KLTH0D11726g
L.A2	A2LA01-024168g	1	-	255	255	LANO0H16248g	LAME0H02256g	ZYRO0F07788g	LAWA0E11298g	LACI0G06524g	LAFE0G08196g	LADA0C06436g	LAFA0B05270g	LAMI0F03906g	SAKL0H06050g	KLTH0D11704g
L.A2	A2LA01-024190g	1	-	256	256	LANO0H16204g	LAME0H02212g	ZYRO0F07766g	LAWA0E11276g	LACI0G06546g	LAFE0G08218g	LADA0C06458g	LAFA0B05292g	LAMI0F03928g	SAKL0H06072g	KLTH0D11660g
L.A2	A2LA01-109924g	1	-	257	257	LANO0H16182g		ZYRO0F07722g	LAWA0E11232g	LACI0G06590g	LAFE0G08240g	LADA0C06458g		LAMI0F03950g	SAKL0H06116g	KLTH0D11638g
L.A2	A2LA01-024234g	1	+	258	258	LANO0H16160g	LAME0H02190g	ZYRO0F07700g	LAWA0E11210g	LACI0G06612g	LAFE0G08262g	LADA0C06502g	LAFA0B05336g	LAMI0F03972g	SAKL0H06138g	KLTH0D11616g
L.A2	A2LA01-024256g	1	+	259	259	LANO0H16138g	LAME0H02168g	ZYRO0F07678g	LAWA0E11188g	LACI0G06634g	LAFE0G08284g	LADA0C06524g	LAFA0B05358g	LAMI0F03994g	SAKL0H06160g	KLTH0D11594g
L.A2	A2LA01-024278g	1	+	260	260	LANO0H16116g	LAME0F12068g	ZYRO0F07656g	LAWA0E11177g	LACI0G06656g	LAFE0G08306g	LADA0C06546g	LAFA0B05380g	LAMI0F04016g	SAKL0H06182g	KLTH0D11572g
L.A2	A2LA01-024300g	1	-	261	261	LANO0H16094g	LAME0F12090g	ZYRO0F07634g	LAWA0E11166g	LACI0G06678g	LAFE0G08328g		LAFA0B05402g	LAMI0F04038g	SAKL0H06204g	KLTH0D11550g
L.A2	A2LA01-024322g	1	-	262	262	LANO0H16072g	LAME0F12112g		LAWA0E11144g	LACI0G06700g	LAFE0G08350g	LADA0C06590g	LAFA0B05424g	LAMI0F04060g	SAKL0H06226g	KLTH0D11528g
L.A2	A2LA01-024344g	1	-	263	263	LANO0H16050g	LAME0F12134g	ZYRO0F07590g	LAWA0E11122g	LACI0G06722g	LAFE0G08372g	LADA0C06612g	LAFA0B05446g	LAMI0F04082g	SAKL0H06248g	KLTH0D11506g
L.A2	A2LA01-024366g	1	-	264	264	LANO0H16028g	LAME0F12156g	ZYRO0F07568g	LAWA0E11100g		LAFE0G08394g	LADA0C06634g	LAFA0B05468g	LAMI0F04104g	SAKL0H06270g	KLTH0D11484g
L.A2	A2LA01-024388g	1	+	265	265	LANO0H16006g	LAME0F12178g	ZYRO0F07546g	LAWA0E11078g	LACI0G06766g	LAFE0G08416g	LADA0C06656g	LAFA0B05490g	LAMI0F04126g	SAKL0H06292g	KLTH0D11462g
L.A2	A2LA01-024410g	1	+	266	266	LANO0H15984g	LAME0F12200g	ZYRO0F07524g	LAWA0E11034g	LACI0G06788g	LAFE0G08438g	LADA0C06678g	LAFA0B05512g	LAMI0F04148g	SAKL0H06336g	KLTH0D11440g
L.A2	A2LA01-109902g	1	+	267	267	LANO0H15962g		ZYRO0F07744g	LAWA0E11012g	LACI0G06810g	LAFE0G08460g				SAKL0H06358g	KLTH0D11418g
L.A2	A2LA01-024432g	1	-	268	268	LANO0H15940g	LAME0F12222g	ZYRO0F07480g	LAWA0E10990g	LACI0G06832g	LAFE0G08482g	LADA0C06700g	LAFA0B05534g	LAMI0F04192g	SAKL0H06380g	KLTH0D11396g
L.A2	A2LA01-024454g	1	+	269	269	LANO0H15918g	LAME0F12244g		LAWA0E10968g	LACI0G06854g	LAFE0G08504g	LADA0C06722g	LAFA0B05556g	LAMI0F04214g	SAKL0H06402g	KLTH0D11374g
L.A2	A2LA01-024476g	1	-	270	270	LANO0H15896g	LAME0F12266g	ZYRO0F07458g		LACI0G06876g	LAFE0G08526g	LADA0C06744g	LAFA0B05578g	LAMI0F04236g	SAKL0H06424g	KLTH0D11352g
L.A2	A2LA01-024498g	1	+	271	271	LANO0H15874g	LAME0F12288g	ZYRO0F07436g	LAWA0E10924g	LACI0G06898g	LAFE0G08548g	LADA0C06766g	LAFA0B05600g	LAMI0F04258g	SAKL0H06446g	KLTH0D11330g
L.A2	A2LA01-024520g	1	-	272	272	LANO0H15852g	LAME0F12310g		LAWA0E10902g	LACI0G06920g	LAFE0G08570g	LADA0C06788g	LAFA0B05622g	LAMI0F04280g	SAKL0H06468g	KLTH0D11308g
L.A2	A2LA01-024542g	1	-	273	273	LANO0H15830g	LAME0F12354g	ZYRO0F07414g	LAWA0E10880g	LACI0G06942g	LAFE0G08592g	LADA0C06832g	LAFA0B05644g	LAMI0F04302g	SAKL0H06490g	KLTH0D11286g
L.A2	A2LA01-024564g	1	-	274	274	LANO0H15808g	LAME0F12376g	ZYRO0F07392g	LAWA0E10858g	LACI0G06964g	LAFE0G08614g	LADA0C06854g	LAFA0B05666g	LAMI0F04324g	SAKL0H06512g	KLTH0D11264g
L.A2	A2LA01-024586g	1	-	275	275	LANO0H15786g	LAME0F12398g	ZYRO0F07370g	LAWA0E10836g	LACI0G06986g	LAFE0G08636g	LADA0C06876g	LAFA0B05688g	LAMI0F04346g	SAKL0H06534g	KLTH0D11242g
L.A2	A2LA01-106294g	1	-	276	276				LAWA0E10814g	LACI0G07008g	LAFE0G08658g			LAMI0F04368g	SAKL0H06556g	KLTH0D11220g
L.A2	A2LA01-024608g	1	+	277	277	LANO0H15764g	LAME0F12420g	ZYRO0F07348g	LAWA0E10792g	LACI0G07030g	LAFE0G08680g	LADA0C06898g	LAFA0B05710g	LAMI0F04390g	SAKL0H06578g	KLTH0D11198g
L.A2	A2LA01-024630g	1	+	278	278	LANO0H15742g	LAME0F12442g	ZYRO0F07326g	LAWA0E10770g	LACI0G07052g	LAFE0G08702g	LADA0C06920g	LAFA0B05732g	LAMI0F04412g	SAKL0H06622g	KLTH0D11176g
L.A2	A2LA01-024652g	1	-	279	279	LANO0H15720g	LAME0F12464g	ZYRO0F07304g	LAWA0E10748g	LACI0G07074g	LAFE0G08724g	LADA0C06942g	LAFA0B05754g	LAMI0F04434g	SAKL0H06644g	KLTH0D11154g
L.A2	A2LA01-024674g	1	-	280	280	LANO0H15698g	LAME0F12486g	ZYRO0F07282g	LAWA0E10726g	LACI0G07096g	LAFE0G08746g	LADA0C06964g	LAFA0B05776g	LAMI0F04456g	SAKL0H06666g	KLTH0D11132g
L.A2	A2LA01-024696g	1	+	281	281	LANO0H15676g	LAME0F12508g	ZYRO0F07260g	LAWA0E10704g	LACI0G07118g	LAFE0G08768g	LADA0C06986g	LAFA0B05798g	LAMI0F04478g	SAKL0H06688g	KLTH0D11110g
L.A2	A2LA01-024718g	1	+	282	282	LANO0H15654g	LAME0F12530g	ZYRO0F07238g	LAWA0E10682g	LACI0G07140g	LAFE0G08790g	LADA0C07008g	LAFA0B05820g	LAMI0F04500g	SAKL0H06710g	KLTH0D11088g
L.A2	A2LA01-024740g	1	-	283	283	LANO0H15632g	LAME0F12552g	ZYRO0F07216g	LAWA0E10660g	LACI0G07162g	LAFE0G08812g	LADA0C07030g	LAFA0B05842g	LAMI0F04522g	SAKL0H06732g	KLTH0D11066g
L.A2	A2LA01-024762g	1	+	284	284	LANO0H15610g	LAME0F12574g	ZYRO0F07194g	LAWA0E10638g	LACI0G07184g	LAFE0G08834g	LADA0C07052g	LAFA0B05864g	LAMI0F04544g	SAKL0H06600g	KLTH0D11044g
L.A2	A2LA01-024784g	1	-	285	285	LANO0H15588g	LAME0F12596g	ZYRO0F06908g	LAWA0E10616g	LACI0G07206g	LAFE0G08856g	LADA0C07074g	LAFA0B05886g	LAMI0F04566g	SAKL0H06776g	KLTH0D11022g
L.A2	A2LA01-024806g	1	+	286	286	LANO0H15566g	LAME0F12618g	ZYRO0F07150g	LAWA0E10594g	LACI0G07228g	LAFE0G08878g	LADA0C07096g	LAFA0B05908g	LAMI0F04588g	SAKL0H06798g	KLTH0D11000g
L.A2	A2LA01-024850g	1	-	287	287	LANO0H15522g	LAME0F12662g	ZYRO0F07084g	LAWA0E10550g	LACI0G07294g	LAFE0G08922g	LADA0C07140g	LAFA0B05974g	LAMI0F04632g	SAKL0H06842g	KLTH0D10956g
L.A2	A2LA01-032968g	1	-	288	288	LANO0H15500g	LAME0F12684g	ZYRO0F07062g	LAWA0E10528g	LACI0G07316g	LAFE0G08944g		LAFA0B05996g	LAMI0F04654g	SAKL0H06864g	KLTH0D10934g
L.A2	A2LA01-024872g	1	-	289	289	LANO0H15478g	LAME0F12706g	ZYRO0F07040g	LAWA0E10506g	LACI0G07338g	LAFE0G08966g	LADA0C07162g	LAFA0B06018g	LAMI0F04676g	SAKL0H06886g	KLTH0D10912g
L.A2	A2LA01-024894g	1	+	290	290	LANO0H15456g	LAME0F12728g	ZYRO0F07018g	LAWA0E10484g	LACI0G07360g	LAFE0G08988g	LADA0C07184g	LAFA0B06040g	LAMI0F04698g	SAKL0H06908g	KLTH0D10890g
L.A2	A2LA01-024916g	1	-	291	291	LANO0H15434g	LAME0F12750g	ZYRO0F06996g	LAWA0E10462g	LACI0G07382g	LAFE0G09010g	LADA0C07206g	LAFA0B06062g	LAMI0F04720g	SAKL0H06930g	KLTH0D10868g
L.A2	A2LA01-024938g	1	-	292	292	LANO0H15412g	LAME0F12772g	ZYRO0F06974g	LAWA0E10440g	LACI0G07404g	LAFE0G09032g	LADA0C07228g	LAFA0B06084g	LAMI0F04742g	SAKL0H06952g	KLTH0D10846g
L.A2	A2LA01-024960g	1	-	293	293	LANO0H15390g	LAME0F12794g	ZYRO0F06952g	LAWA0E10418g	LACI0G07426g	LAFE0G09054g	LADA0C07250g	LAFA0B06106g	LAMI0F04764g	SAKL0H06974g	KLTH0D10824g
L.A2	A2LA01-024982g	1	-	294	294	LANO0H15368g	LAME0F12816g	ZYRO0F06930g	LAWA0E10396g	LACI0G07448g	LAFE0G09076g	LADA0C07272g	LAFA0B06128g	LAMI0H05754g	SAKL0H06996g	KLTH0D10802g
L.A2	A2LA01-025004g	1	+	295	295	LANO0H15346g	LAME0F12838g	ZYRO0F06908g	LAWA0E10374g	LACI0G07470g	LAFE0G09142g	LADA0C07294g	LAFA0B06150g	LAMI0H05798g	SAKL0H07007g	KLTH0D10780g
L.A2	A2LA01-025026g	1	+	296	296	LANO0H15192g	LAME0F12860g	ZYRO0F06864g	LAWA0E10352g	LACI0G07514g	LAFE0G09186g	LADA0C07316g	LAFA0B06172g	LAMI0H05842g	SAKL0H07062g	KLTH0D10736g
L.A2	A2LA01-025048g	1	-	297	297	LANO0H15170g	LAME0F12882g	ZYRO0F06842g	LAWA0E10330g	LACI0G07536g	LAFE0G09208g	LADA0C07338g	LAFA0B06194g	LAMI0H05864g	SAKL0H07084g	KLTH0D10714g
L.A2	A2LA01-025070g	1	-	298	298	LANO0H15148g	LAME0F12904g	ZYRO0F06820g	LAWA0E10308g	LACI0G07558g	LAFE0G09230g	LADA0C07360g	LAFA0B06216g	LAMI0H05886g	SAKL0H07106g	KLTH0D10692g
L.A2	A2LA01-025092g	1	-	299	299	LANO0H15126g	LAME0F12926g	ZYRO0F06798g	LAWA0E10286g	LACI0G07580g	LAFE0G09252g	LADA0C07382g	LAFA0B06238g	LAMI0H05908g	SAKL0H07128g	KLTH0D10670g
L.A2	A2LA01-025114g	1	-	300	300	LANO0H15104g	LAME0F12948g	ZYRO0F06776g	LAWA0E10264g	LACI0G07602g	LAFE0G09274g	LADA0C07426g	LAFA0B06260g	LAMI0H05930g	SAKL0H07150g	KLTH0D10648g
L.A2	A2LA01-025136g	1	-	301	301	LANO0H15082g	LAME0F12970g	ZYRO0F06754g	LAWA0E10242g	LACI0G07624g	LAFE0G09296g	LADA0C07448g	LAFA0B06282g	LAMI0H05974g	SAKL0H07172g	KLTH0D10626g
L.A2	A2LA01-025158g	1	+	302	302	LANO0H15060g	LAME0F12992g	ZYRO0F06732g	LAWA0E10220g	LACI0G07646g	LAFE0G09318g	LADA0C07470g	LAFA0B06304g	LAMI0H05996g	SAKL0H07194g	KLTH0D10604g
L.A2	A2LA01-025180g	1	-	303	303	LANO0H15038g	LAME0F13014g	ZYRO0F06710g	LAWA0E10198g	LACI0G07668g	LAFE0G09340g	LADA0C07492g	LAFA0B06326g	LAMI0H06018g	SAKL0H07216g	KLTH0D10582g
L.A2	A2LA01-025202g	1	+	304	304	LANO0H15016g	LAME0F13036g	ZYRO0F06688g	LAWA0E10176g	LACI0G07690g	LAFE0G09362g	LADA0C07536g	LAFA0B06348g	LAMI0H06040g	SAKL0H07238g	KLTH0D10560g
L.A2	A2LA01-025224g	1	+	305	305	LANO0H14994g	LAME0F13058g	ZYRO0F06644g	LAWA0E10154g	LACI0G07712g	LAFE0G09384g	LADA0C07558g	LAFA0B06370g	LAMI0H06062g	SAKL0H07260g	KLTH0D10538g
L.A2	A2LA01-025246g	1	+	306	306	LANO0H14972g	LAME0F13080g		LAWA0E10132g	LACI0G07734g	LAFE0G09406g	LADA0C07580g	LAFA0B06392g	LAMI0H06084g	SAKL0H07282g	KLTH0D10516g
L.A2	A2LA01-025268g	1	-	307	307	LANO0H14950g	LAME0F13102g	ZYRO0F06622g	LAWA0E10110g	LACI0G07756g	LAFE0G09428g	LADA0C07602g	LAFA0B06414g	LAMI0H06106g	SAKL0H07304g	KLTH0D10494g
[truncated: 4,409 more rows]

## Sheet: L.A3
Ancestor	Ancest gene name	chr	strand	ID/chr	ID/genome	LANO	LAME	ZYRO	LAWA	LACI	LAFE	LADA	LAFA	LAMI	SAKL	KLTH
[truncated: 4,666 more rows]

[truncated: 6 more sheets: L.A4, L.A5, L.A6, L.A7, L.A8, L.A9]
