# Supplementary material for: Reconstruction of ancestral chromosome architecture and gene repertoire reveals principles of genome evolution in a model yeast genus
Source: HighWire-hosted journal article supplement (doi:10.1101/gr.204420.116), 2016-05-31
Supplement: Supplemental_Table_S7_to_S11.xlsx [file Supplemental_Table_S7_to_S11.xlsx]

## Sheet: Table S7
SACE ORF	SACE gene name	L. fantastica	L. meyersii	L. dasiensis	L. nothofagi	L. thermotolerans	L. waltii	L. mirantina	L. fermentati	L. cidri	L. kluyveri	Description
YOR005C	DNL4	LAFA0B07624g	LAME0D10682g	LADA0B10440g	LANO0A06766g	KLTH0C11286g	LAWA0A00782g	LAMI0B07954g	LAFE0E00584g	LACI0E00650g	SAKL0E01122pg*	DNA ligase required for nonhomologous end-joining (NHEJ), forms stable heterodimer with required cofactor Lif1p, interacts with Nej1p
YCR014C	POL4	LAFA0G15676g	LAME0E11496g	LADA0H17458g	LANO0G15720g	KLTH0H13662g	LAWA0H11782g	LAMI0E06326g	LAFE0F11122g	LACI0C02630g	SAKL0D10362g	DNA polymerase IV, undergoes pair-wise interactions with Dnl4p-Lif1p and Rad27p to mediate repair of DNA double-strand breaks by non-homologous end joining (NHEJ)
YGL090W	LIF1	LAFA0C02674g	LAME0C08724g	LADA0D00848g	LANO0F01002g	KLTH0H04928g	LAWA0F07492g*	LAMI0D10000g	LAFE0C05402g	LACI0G20582g	-	Component of the DNA ligase IV complex that mediates nonhomologous end joining in DNA double-strand break repair
YLR265C	NEJ1	LAFA0F02762g	LAME0D09780g	LADA0B09582g	LANO0A05908g	KLTH0C10252g	LAWA0A01728g	LAMI0B07140g	LAFE0E01684g	LACI0E01728g	-	Protein involved in regulation of nonhomologous end joining
*: pseudogenes

## Sheet: Table S8
S. cerevisiae ORF	S. cerevisiae name	L. fantastica	L. meyersii	L. dasiensis	L. nothofagi	L. thermotolerans	L. waltii	L. mirantina	L. fermentati	L. cidri	L. kluyveri	Description
YDR285W	ZIP1	LAFA0E12486g	LAME0H09758g	LADA0E07294g	LANO0H10308g	KLTH0G06512g	LAWA0G13586g	LAMI0D03884g	LAFE0A04104g	LACI0F12838g	SAKL0G10428g	Transverse filament protein of the synaptonemal complex
YGL249W	ZIP2	-	-	-	-	-	-	-	-	-	SAKL0F00572g	Meiosis-specific protein
YLR394W	CST9 (ZIP3)	-	-	-	-	-	-	-	-	-	SAKL0H02838g	SUMO E3 ligase
YIL073C	SPO22 (ZIP4)	-	-	-	-	-	-	-	-	-	SAKL0F09438g	Meiosis-specific protein essential for chromosome synapsis, involved in completion of nuclear divisions during meiosis
YHR153C	SPO16	-	-	-	-	-	-	-	-	-	SAKL0G15576g	Meiosis-specific protein involved in synaptonemal complex assembly
YFL003C	MSH4	-	-	-	-	-	-	-	-	-	SAKL0B02420g	Protein involved in meiotic recombination, required for normal levels of crossing over, colocalizes with Zip2p to discrete foci on meiotic chromosomes, has homology to bacterial MutS protein
YDL154W	MSH5	-	-	-	-	-	-	-	-	-	SAKL0F10846g	Protein that forms heterodimers with Msh3p and Msh6p that bind to DNA mismatches to initiate the mismatch repair process | Protein of the MutS family, forms a dimer with Msh4p that facilitates crossovers between homologs during meiosis
YLR035C	MLH2	-	-	-	-	-	-	-	-	-	SAKL0E04620g	Protein involved in the mismatch repair of certain frameshift intermediates and involved in meiotic recombination
YGL251C	HFM1 (MER3)	-	-	LADA0G16468g	LANO0D00496g	-	LAWA0D13608g	-	-	-	SAKL0F00528g	Meiosis specific DNA helicase involved in the conversion of double-stranded breaks to later recombination intermediates and in crossover control | RNA-dependent ATPase RNA helicase (DEIH box) | Putative RNA helicase related to Ski2p, involved in translation inhibition of non-poly(A) mRNAs

## Sheet: Table S9
Species	# strains	# Hapl	# Dip	# Tetraploid	# dubious
L. cidri	2	1	1	0	0
L. dasiensis	3	3	0	0	0
L. fantastica	1	1	0	0	0
L. fermentati	13	12	1	0	0
L. kluyveri	24	7	14	2	1
L. meyersii	5	5	0	0	0
L. mirantina	1	1	0	0	0
L. nothofagi	2	2	0	0	0
L. thermotolerans	30	22	3	0	5
L. waltii	9	2	5	0	2
total	90	56	24	2	8

## Sheet: Table S10
Species	Strain	Ploidy
L. cidri	CBS4575T	Diploid
L. cidri	CBS2950*	Haploid
L. dasiensis	CBS10888T*	Haploid
L. dasiensis	ES12S06	Haploid
L. dasiensis	SC6L01	Haploid
L. fantastica	CBS6924*	Haploid
L. fermentati	CBS707T	Diploid
L. fermentati	CBS797	Haploid
L. fermentati	CBS7445	Haploid
L. fermentati	CBS4506	Haploid
L. fermentati	CBS4586	Haploid
L. fermentati	CBS6544	Haploid
L. fermentati	CBS6711	Haploid
L. fermentati	CBS6772*	Haploid
L. fermentati	CBS7004	Haploid
L. fermentati	CBS7446	Haploid
L. fermentati	CBS4506	Haploid
L. fermentati	MUCL30926	Haploid
L. fermentati	MUCL31808	Haploid
L. kluyveri	CBS3082T*	Diploid
L. kluyveri	CBS2861	Haploid
L. kluyveri	CBS4104	dubious
L. kluyveri	CBS5828	Diploid
L. kluyveri	CBS6545	Tetraploid
L. kluyveri	CBS6546	Diploid
L. kluyveri	CBS6547	Diploid
L. kluyveri	CBS6548	Haploid
L. kluyveri	CBS6626	Diploid
L. kluyveri	CBS10367 blanche	Diploid
L. kluyveri	CBS10368	Haploid
L. kluyveri	CBS10369	Diploid
L. kluyveri	NCYC 543	Haploid
L. kluyveri	77-1003	Diploid
L. kluyveri	DBVPG 3108	Haploid
L. kluyveri	dd245	Haploid
L. kluyveri	62-1041	Diploid
L. kluyveri	dd281a	Diploid
L. kluyveri	68-912	Tetraploid
L. kluyveri	55-91	Diploid
L. kluyveri	57-78	Diploid
L. kluyveri	DBVPG 3103	Diploid
L. kluyveri	DBVPG 3470	Diploid
L. kluyveri	UWOPS 79-150	Haploid
L. meyersii	CBS 8951T*	Haploid
L. meyersii	CBS 9923	Haploid
L. meyersii	CBS 9924	Haploid
L. meyersii	CBS 9925	Haploid
L. meyersii	CBS 9958	Haploid
L. mirantina	CBS 11717T*	Haploid
L. nothofagi	CBS 11611T*	Haploid
L. nothofagi	CBS 11399	Haploid
L. thermotolerans	CBS 6340T*	Diploid
L. thermotolerans	CBS 7772	Haploid
L. thermotolerans	CBS 5665	dubious
L. thermotolerans	CBS 6052	dubious
L. thermotolerans	CBS 2803	Haploid
L. thermotolerans	CBS 2907	Haploid
L. thermotolerans	CBS 2917	Haploid
L. thermotolerans	CBS 5464	Haploid
L. thermotolerans	CBS 6292	Haploid
L. thermotolerans	CBS 6467	Haploid
L. thermotolerans	NRRL Y-8284	Diploid
L. thermotolerans	CBS 2803	Haploid
L. thermotolerans	CBS 137	Haploid
L. thermotolerans	CBS 1877	Haploid
L. thermotolerans	CBS 2860	dubious
L. thermotolerans	CBS 4728	Haploid
L. thermotolerans	IMAT2508	dubious
L. thermotolerans	IMAT2510	dubious
L. thermotolerans	MUCL51148	Diploid
L. thermotolerans	MUCL31341	Haploid
L. thermotolerans	MUCL31809	Haploid
L. thermotolerans	MUCL31349	Haploid
L. thermotolerans	MUCL31342	Haploid
L. thermotolerans	MUCL47720	Haploid
L. thermotolerans	CBS 10516	Haploid
L. thermotolerans	CBS 10517	Haploid
L. thermotolerans	CBS 10518	Haploid
L. thermotolerans	CBS 10519	Haploid
L. thermotolerans	CBS 10520	Haploid
L. thermotolerans	CBS 10521	Haploid
L. waltii	CBS 6430T*	Diploid
L. waltii	UWOPS81-128	Haploid
L. waltii	UWOPS78-160	Diploid
L. waltii	UWOPS79-161	Diploid
L. waltii	UWOPS82-227	dubious
L. waltii	UWOPS82-228	Haploid
L. waltii	CBS 7703	dubious
L. waltii	CBS 8527	Diploid
L. waltii	CBS 8528	Diploid
T type strain
* sequenced strains

## Sheet: Table S11
Name	Sequence (5’-3’)	Description
PEX2-CBP1 forward	ATGTTACGATCAGATTCCATTGGC	re-assembly of the Mat locus in L. waltii
PEX2-CBP1 reverse	CTTGAAGAGACATTGCCTTATTGC	re-assembly of the Mat locus in L. waltii
CBP1-NUC1 forward	CTTACACTATCCGCACTACTACG	re-assembly of the Mat locus in L. waltii
CBP1-NUC1 reverse	AGTTAACTGACTTCGAGGTACCG	re-assembly of the Mat locus in L. waltii
NUC1-LAA1 forward	CTGACGGATTGACATTAGAACCTC	re-assembly of the Mat locus in L. waltii
NUC1-LAA1 reverse	CGTTAGATAGCAGCATATTGGAGG	re-assembly of the Mat locus in L. waltii
LAFA1	CAGTAAGTGGTATGCTTCTGATGG	gap filling at Mat and silent cassettes loci
LAFA2	TAGTCTACGTGCTCTGGAAGTATC	gap filling at Mat and silent cassettes loci
LAFA3	CCAGAAAGTCAATGTTCTCCAGAA	gap filling at Mat and silent cassettes loci
LADA1	TATAATGACCTTGTGTTGGATGGC	gap filling at Mat and silent cassettes loci
LADA2	ATCGATGCTGTTGGTAAGATGAAG	gap filling at Mat and silent cassettes loci
LADA3	AGTGTCCTTCGATAACAGAGTTCT	gap filling at Mat and silent cassettes loci
LADA4	CTGTAGGTTGATGGTATGCACTG	gap filling at Mat and silent cassettes loci
LAME1	TGTAAGGAAGTGTCAGGTAGAGAG	gap filling at Mat and silent cassettes loci
LAME2	CTTGAACAGCTTGAAGAATTGACG	gap filling at Mat and silent cassettes loci
LAME3	TATACGATGATGAGTGTAGAACAG	gap filling at Mat and silent cassettes loci
LANO1	ACAGTTGAGACAAGAACATCTAGC	gap filling at Mat and silent cassettes loci
LANO2	TTGAACGTTGTACATAGACGTGC	gap filling at Mat and silent cassettes loci
LANO3	TAATCAACTTGCCTCAGAATGACG	gap filling at Mat and silent cassettes loci
LANO4	CAATGTTAGTGAGCATTGCATAGC	gap filling at Mat and silent cassettes loci
LANO5	TAAGGTGATACGGTGAGTTCTAGG	gap filling at Mat and silent cassettes loci
LANO6	ACTGTAGGTTGATGGTATGCATTC	gap filling at Mat and silent cassettes loci
SEFCiF	ATCTTACAAGACGTGGATTG	gap filling at Mat and silent cassettes loci
SLACiR	GTTAGAAAATGCTTTAGAAGATG	gap filling at Mat and silent cassettes loci
SLAMiF	GATTGTGAGACTTGAGAATG	gap filling at Mat and silent cassettes loci
SEFMiR	AGGTTTCATCTATCATACGG	gap filling at Mat and silent cassettes loci
GF-Sk-CHS3-1-5'	ATCTTTTGCGAAGGTTAGAAA	3-way PCR for deletion of CHS3 gene
GF-Sk-CHS3-1-3'	GTCGACCTGCAGCGTACGAAGCCATTCCAGACATGGTTCGTT	3-way PCR for deletion of CHS3 gene
GF-Sk-CHS3-2-5'	CGAGCTCGAATTCATCGATTGCTGTATCAATGGATATGGCTTGA	3-way PCR for deletion of CHS3 gene
GF-Sk-CHS3-2-3'	ACAAATAAGGCCTGAGGCAT	3-way PCR for deletion of CHS3 gene
GF-Sk-upCHS3	GATTCATGCTCAAGTTTACA	3-way PCR for deletion of CHS3 gene
GF-Sk-downCHS3	GACCAAAACTTTCTCAAGAT	3-way PCR for deletion of CHS3 gene
