# Supplementary material for: Reconstruction of ancestral chromosome architecture and gene repertoire reveals principles of genome evolution in a model yeast genus
Source: HighWire-hosted journal article supplement (doi:10.1101/gr.204420.116), 2016-05-31
Supplement: Supplemental_Table_S12.xlsx [file Supplemental_Table_S12.xlsx]

## Sheet: Table S12
Family ID	LAWA count	KLTH count	LAME count	LAFA count	LACI count	LAFE count	LADA count	LANO count	LAMI count	SAKL count	SACE count	LAWA	KLTH	LAME	LAFA	LACI	LAFE	LADA	LANO	LAMI	SAKL	SACE ORF	SACE gene name	Description of SACE member(s) (if present)	GO cellular component (times found)	GO molecular function (times found)	GO biological process (times found)	SACE dubious	LAWA pseudocount	KLTH pseudocount	LAME pseudocount	LAFA pseudocount	LACI pseudocount	LAFE pseudocount	LADA pseudocount	LANO pseudocount	LAMI pseudocount	SAKL pseudocount	pseudoLAWA	pseudoKLTH	pseudoLAME	pseudoLAFA	pseudoLACI	pseudoLAFE	pseudoLADA	pseudoLANO	pseudoLAMI	pseudoSAKL
1	17	18	18	18	18	18	18	18	18	19	25	LAWA0E10836g,LAWA0A01134g,LAWA0A09252g,LAWA0G03862g,LAWA0E04852g,LAWA0A09054g,LAWA0D08790g,LAWA0A02850g,LAWA0H03004g,LAWA0D01288g,LAWA0A02278g,LAWA0C04588g,LAWA0F04654g,LAWA0E10330g,LAWA0E10638g,LAWA0G17414g,LAWA0C08174g	KLTH0D11242g,KLTH0C10912g,KLTH0H03982g,KLTH0F09988g,KLTH0D04818g,KLTH0G18194g,KLTH0H04180g,KLTH0C09548g,KLTH0C08932g,KLTH0D17204g,KLTH0G05214g,KLTH0F04840g,KLTH0C05478g,KLTH0D10714g,KLTH0D11044g,KLTH0A07458g,KLTH0G13288g,KLTH0B06424g	LAME0F12398g,LAME0D10374g,LAME0H11034g,LAME0B04390g,LAME0E05094g,LAME0G17260g,LAME0B04192g,LAME0F05996g,LAME0E13608g,LAME0F06458g,LAME0G04390g,LAME0F12882g,LAME0A06854g,LAME0E03048g,LAME0F00606g,LAME0G08394g,LAME0F12574g,LAME0F17282g	LAFA0B05688g,LAFA0F02190g,LAFA0G09428g,LAFA0G20780g,LAFA0F10022g,LAFA0E13740g,LAFA0F03928g,LAFA0G20582g,LAFA0F06370g,LAFA0F03466g,LAFA0G04478g,LAFA0A01464g,LAFA0B06194g,LAFA0D04544g,LAFA0B05864g,LAFA0F12816g,LAFA0E05270g,LAFA0F10924g	LACI0G06986g,LACI0F14576g,LACI0E01178g,LACI0G21550g,LACI0D11210g,LACI0C05072g,LACI0G21352g,LACI0D04434g,LACI0E03048g,LACI0G00760g,LACI0E08768g,LACI0D05666g,LACI0G24960g,LACI0G07184g,LACI0E02586g,LACI0G07536g,LACI0H12486g,LACI0H07646g	LAFE0G08636g,LAFE0E09362g,LAFE0E01112g,LAFE0F13520g,LAFE0C04412g,LAFE0H16094g,LAFE0C04610g,LAFE0A00540g,LAFE0G04588g,LAFE0B08592g,LAFE0B09868g,LAFE0E02366g,LAFE0E02850g,LAFE0G09208g,LAFE0C00628g,LAFE0G08834g,LAFE0H09054g,LAFE0H04148g	LADA0C06876g,LADA0G07624g,LADA0B10132g,LADA0C02366g,LADA0G09956g,LADA0H10330g,LADA0H10110g,LADA0E04500g,LADA0B08262g,LADA0A08460g,LADA0B08702g,LADA0H06810g,LADA0C11100g,LADA0F15170g,LADA0F02982g,LADA0C07052g,LADA0E02608g,LADA0D02982g	LANO0H15786g,LANO0H11606g,LANO0A06458g,LANO0G09428g,LANO0A04632g,LANO0E04148g,LANO0E03950g,LANO0D07162g,LANO0G04390g,LANO0B00584g,LANO0A05138g,LANO0F12618g,LANO0D09824g,LANO0H15170g,LANO0C06788g,LANO0A00738g,LANO0H15610g,LANO0H03224g	LAMI0F04346g,LAMI0B07646g,LAMI0G10176g,LAMI0G04962g,LAMI0G10352g,LAMI0E02300g,LAMI0H02938g,LAMI0C03378g,LAMI0B05908g,LAMI0G13256g,LAMI0H05864g,LAMI0F09076g,LAMI0B06524g,LAMI0A00804g,LAMI0H15962g,LAMI0F04544g,LAMI0B00650g,LAMI0G16534g	SAKL0H06534g,SAKL0E01584g,SAKL0E05984g,SAKL0A04246g,SAKL0E03608g,SAKL0A04466g,SAKL0B12364g,SAKL0C08844g,SAKL0G06402g,SAKL0C05368g,SAKL0H07084g,SAKL0C09174g,SAKL0F13618g,SAKL0A00484g,SAKL0H06754g,SAKL0H16632g,SAKL0E12342g,SAKL0B04752g,SAKL0D06666g	YPL153C,YMR001C,YDL101C,YPL209C,YKL126W,YOL100W,YPL203W,YMR104C,YHR205W,YGL179C,YKL166C,YJL164C,YBL105C,YCR091W,YOR233W,YDR490C,YBR028C,YDR466W,YNR047W,YPL150W,YLR096W,YNL161W,YGL158W,YDR122W,YGR052W	RAD53,CDC5,DUN1,IPL1,YPK1,PKH2,TPK2,YPK2,SCH9,TOS3,TPK3,TPK1,PKC1,KIN82,KIN4,PKH1,YPK3,PKH3,FPK1,Unknown name,KIN2,CBK1,RCK1,KIN1,FMP48	Protein kinase, required for cell-cycle arrest in response to DNA damage | Polo-like kinase with multiple functions in mitosis and cytokinesis through substrate phosphorylation, also functions in adaptation to DNA damage during meiosis | Cell-cycle checkpoint serine-threonine kinase required for DNA damage-induced transcription of certain target genes, phosphorylation of Rad55p and Sml1p, and tra…	site of polarized growth (x4) | cell cortex (x4) | membrane (x4) | unknown (x2) | microtubule organizing center (x15) | vacuole (x4) | nucleus (x6) | plasma membrane (x1) | cytoplasm (x1) | mitochondrion (x12) | cytoskeleton (x5) | cellular bud (x5) | chromosome (x1)	kinase activity (x1) | DNA binding (x25)	mitotic cell cycle (x1) | response to osmotic stress (x1) | DNA replication (x2) | carbohydrate metabolic process (x3) | chromosome segregation (x1) | invasive growth in response to glucose limitation (x1) | protein complex biogenesis (x1) | response to oxidative stress (x5) | organelle fission (x2) | organelle assembly (x2) | DNA repair (x4) | nucleobase-containing small molecule metabolic proce…	-	1	0	0	0	0	0	0	0	0	0	LAWA0A07382g	-	-	-	-	-	-	-	-	-
2	16	19	14	13	19	19	19	17	14	25	18	LAWA0E14774g,LAWA0E01420g,LAWA0F14928g,LAWA0C06634g,LAWA0E07162g,LAWA0C13322g,LAWA0C02388g,LAWA0F04346g,LAWA0C02410g,LAWA0C12508g,LAWA0C01574g,LAWA0G05952g,LAWA0G05094g,LAWA0C01596g,LAWA0A03752g,LAWA0G00320g	KLTH0E00550g,KLTH0F02398g,KLTH0D07128g,KLTH0D01474g,KLTH0B01166g,KLTH0F02420g,KLTH0B02046g,KLTH0H13398g,KLTH0E15642g,KLTH0F01606g,KLTH0C05170g,KLTH0F01584g,KLTH0C08052g,KLTH0B00154g,KLTH0F11286g,KLTH0A00308g,KLTH0E11792g,KLTH0G11726g,KLTH0F04048g	LAME0G15082g,LAME0C00914g,LAME0G19218g,LAME0G20142g,LAME0H07250g,LAME0G01398g,LAME0G02234g,LAME0G01442g,LAME0F05072g,LAME0B00100g,LAME0E06216g,LAME0F20252g,LAME0G11430g,LAME0H08548g	LAFA0F00804g,LAFA0F07800g,LAFA0F01794g,LAFA0F00870g,LAFA0G02322g,LAFA0G01398g,LAFA0G01420g,LAFA0F00254g,LAFA0G24498g,LAFA0F04852g,LAFA0G10550g,LAFA0E19438g,LAFA0F03356g	LACI0A00430g,LACI0E11100g,LACI0H25884g,LACI0E06722g,LACI0B01244g,LACI0E11078g,LACI0E11056g,LACI0G17898g,LACI0A01266g,LACI0A02234g,LACI0E11804g,LACI0E07910g,LACI0E11826g,LACI0E04038g,LACI0F01970g,LACI0G15918g,LACI0G11386g,LACI0G19064g,LACI0H11122g	LAFE0C03620g,LAFE0G02278g,LAFE0G02300g,LAFE0B11672g,LAFE0G06766g,LAFE0G06788g,LAFE0D11848g,LAFE0G02322g,LAFE0A07008g,LAFE0A07844g,LAFE0G01552g,LAFE0G05534g,LAFE0G01530g,LAFE0G17568g,LAFE0E03840g,LAFE0D09802g,LAFE0H00650g,LAFE0G13256g,LAFE0H07624g	LADA0E14642g,LADA0F15632g,LADA0G00606g,LADA0C00254g,LADA0G12156g,LADA0F15676g,LADA0B10880g,LADA0D12068g,LADA0H02300g,LADA0H01486g,LADA0H01442g,LADA0C12970g,LADA0B07294g,LADA0E00100g,LADA0C03576g,LADA0B10946g,LADA0B08922g,LADA0D05402g,LADA0G06150g	LANO0B08922g,LANO0G02234g,LANO0D04874g,LANO0B07646g,LANO0G02256g,LANO0E08306g,LANO0D11122g,LANO0E16380g,LANO0G01420g,LANO0G01442g,LANO0D11232g,LANO0A03708g,LANO0G10572g,LANO0H25180g,LANO0E09648g,LANO0H25224g,LANO0H05182g	LAMI0F02146g,LAMI0F14972g,LAMI0F02168g,LAMI0E11892g,LAMI0A07558g,LAMI0F01442g,LAMI0G01002g,LAMI0A08416g,LAMI0F01420g,LAMI0D09538g,LAMI0A08812g,LAMI0H17282g,LAMI0C00254g,LAMI0H07382g	SAKL0B04554g,SAKL0C13992g,SAKL0C02662g,SAKL0C02640g,SAKL0A09724g,SAKL0G14014g,SAKL0D04664g,SAKL0D00836g,SAKL0C02684g,SAKL0C01232g,SAKL0B10956g,SAKL0C01650g,SAKL0D02970g,SAKL0D02948g,SAKL0C02728g,SAKL0G14916g,SAKL0F09790g,SAKL0D02926g,SAKL0D10142g,SAKL0H08184g,SAKL0D04048g,SAKL0B08734g,SAKL0F16544g,SAKL0H10890g,SAKL0H15092g	YFL055W,YPL265W,YGR191W,YEL063C,YKR039W,YNL268W,YBR068C,YCL025C,YDR046C,YNL270C,YDR508C,YBR069C,YOR348C,YOL020W,YBR132C,YLL061W,YPL274W,YDR160W	AGP3,DIP5,HIP1,CAN1,GAP1,LYP1,BAP2,AGP1,BAP3,ALP1,GNP1,TAT1,PUT4,TAT2,AGP2,MMP1,SAM3,SSY1	Low-affinity amino acid permease, may act to supply the cell with amino acids as nitrogen source in nitrogen-poor conditions | Dicarboxylic amino acid permease | High-affinity histidine permease, also involved in the transport of manganese ions | Plasma membrane arginine permease | General amino acid permease | Lysine permease | High-affinity leucine permease | Low-affinity amino acid permease wi…	cytoplasm (x7) | endoplasmic reticulum (x1) | endomembrane system (x1) | vacuole (x1) | cytoplasmic membrane-bounded vesicle (x18) | membrane (x4) | mitochondrion (x18) | plasma membrane (x3)	unknown (x1) | transmembrane transporter activity (x17)	response to chemical stimulus (x17) | amino acid transport (x17) | response to osmotic stress (x1) | nucleobase-containing compound transport (x1) | ion transport (x2) | lipid metabolic process (x1) | transmembrane transport (x8)	-	2	2	1	2	0	0	0	1	2	2	LAWA0H11584g,LAWA0F11232g	KLTH0A00176pg,KLTH0D00176pg	LAME0H00188g	LAFA0F12310g,LAFA0B00628g	-	-	-	LANO0D00166g	LAMI0F02212g,LAMI0B06172g	SAKL0B00418pg,SAKL0G08954pg
3	13	16	16	15	19	17	14	17	13	18	26	LAWA0H11848g,LAWA0B02542g,LAWA0H00870g,LAWA0E00342g,LAWA0A00122g,LAWA0B00386g,LAWA0A12882g,LAWA0F00188g,LAWA0A02454g,LAWA0A11122g,LAWA0C10000g,LAWA0F09868g,LAWA0B08350g	KLTH0H13728g,KLTH0E02750g,KLTH0B00330g,KLTH0E02772g,KLTH0C00462g,KLTH0H00308g,KLTH0D00484g,KLTH0G19404g,KLTH0H13376g,KLTH0H02156g,KLTH0C09372g,KLTH0E10406g,KLTH0B04510g,KLTH0G11154g,KLTH0F15136g,KLTH0D00572g	LAME0E11628g,LAME0E00254g,LAME0G18404g,LAME0G18382g,LAME0B08020g,LAME0G20120g,LAME0E11276g,LAME0F03576g,LAME0D11232g,LAME0B06216g,LAME0F06282g,LAME0C04104g,LAME0H17238g,LAME0F10220g,LAME0G11980g,LAME0D08636g	LAFA0G15808g,LAFA0F03642g,LAFA0F22342g,LAFA0G17920g,LAFA0G17898g,LAFA0G24410g,LAFA0B08108g,LAFA0E19284g,LAFA0C04632g,LAFA0G22606g,LAFA0B03774g,LAFA0D06480g,LAFA0F18096g,LAFA0E20010g,LAFA0D12772g	LACI0C02740g,LACI0E02762g,LACI0F03642g,LACI0F03686g,LACI0D11276g,LACI0E00166g,LACI0C09890g,LACI0F03620g,LACI0F03664g,LACI0H00210g,LACI0C02432g,LACI0H03334g,LACI0H04962g,LACI0H22034g,LACI0B03598g,LACI0F15368g,LACI0H08614g,LACI0G18910g,LACI0A00540g	LAFE0F11254g,LAFE0D07954g,LAFE0D07910g,LAFE0D07932g,LAFE0D07976g,LAFE0B00452g,LAFE0F10902g,LAFE0B03444g,LAFE0E02542g,LAFE0H01486g,LAFE0C13982g,LAFE0E10154g,LAFE0C09252g,LAFE0H05116g,LAFE0F04148g,LAFE0D12860g,LAFE0E05160g	LADA0H17524g,LADA0B08526g,LADA0F12244g,LADA0F12178g,LADA0B11408g,LADA0D01486g,LADA0F15610g,LADA0B00342g,LADA0H17172g,LADA0F13630g,LADA0D09142g,LADA0B04148g,LADA0D06810g,LADA0H09912g	LANO0G15830g,LANO0E00320g,LANO0B04852g,LANO0B04830g,LANO0F17480g,LANO0A00188g,LANO0D11034g,LANO0E06062g,LANO0G15522g,LANO0E02102g,LANO0A04940g,LANO0E13322g,LANO0H05798g,LANO0E10968g,LANO0F09538g,LANO0H21528g,LANO0G18316g	LAMI0E06392g,LAMI0G16160g,LAMI0B06370g,LAMI0C01178g,LAMI0F03246g,LAMI0C01200g,LAMI0A06634g,LAMI0E11562g,LAMI0E01002g,LAMI0E03070g,LAMI0B05358g,LAMI0E14554g,LAMI0H00144g	SAKL0D10450g,SAKL0G03432g,SAKL0C11066g,SAKL0E06864g,SAKL0B12540g,SAKL0G19844g,SAKL0G07678g,SAKL0C00154g,SAKL0C02134g,SAKL0G07656g,SAKL0C07920g,SAKL0D10131g,SAKL0B00264g,SAKL0C09350g,SAKL0F10362g,SAKL0G18810g,SAKL0D14960g,SAKL0H12518g	YOL103W,YDR497C,YJL219W,YOL156W,YDR342C,YDR343C,YMR011W,YHR092C,YIL170W,YLR081W,YJL214W,YHR096C,YFL011W,YHR094C,YDR345C,YEL069C,YNR072W,YDL245C,YJR158W,YNL318C,YIL171W,YDL194W,YDL138W,YDR536W,YDR387C,YDL199C	ITR2,ITR1,HXT9,HXT11,HXT7,HXT6,HXT2,HXT4,HXT12,GAL2,HXT8,HXT5,HXT10,HXT1,HXT3,HXT13,HXT17,HXT15,HXT16,HXT14,Unknown name,SNF3,RGT2,STL1,Unknown name,Unknown name	Myo-inositol transporter | Myo-inositol transporter | Putative hexose transporter that is nearly identical to Hxt11p, has similarity to major facilitator superfamily (MFS) transporters, expression of HXT9 is regulated by transcription factors Pdr1p and Pdr3p | Putative hexose transporter that is nearly identical to Hxt9p, has similarity to major facilitator superfamily (MFS) transporters and is i…	mitochondrion (x5) | cytoplasm (x24) | vacuole (x4) | plasma membrane (x22) | membrane (x1)	other (x2) | transmembrane transporter activity (x22)	response to chemical stimulus (x1) | carbohydrate metabolic process (x19) | transmembrane transport (x1) | regulation of cell cycle (x1) | carbohydrate transport (x1) | meiotic cell cycle (x2) | other (x2) | signaling (x10)	-	5	1	0	0	2	2	0	0	0	3	LAWA0E00298g,LAWA0B02520g,LAWA0F15544g,LAWA0H11562g,LAWA0F08592g	KLTH0G19514pg	-	-	LACI0A00474g,LACI0E00276g	LAFE0H16182g,LAFE0E15258g	-	-	-	SAKL0C00286pg,SAKL0D15246pg,SAKL0E00836pg
4	2	1	1	1	0	4	1	1	2	10	85	LAWA0C09802g,LAWA0B01618g	KLTH0B04686g	LAME0C04280g	LAFA0B03950g	-	LAFE0H08460g1_2,LAFE0G11672g1_2,LAFE0E05534g1_2,LAFE0D01552g	LADA0D08878g	LANO0D06678g	LAMI0B05820g,LAMI0G02454g	SAKL0B11572g1_2,SAKL0C11902g1_2,SAKL0F06798g1_2,SAKL0D08206g,SAKL0C11902g,SAKL0E01276g,SAKL0B11572g,SAKL0F06798g,SAKL0H19756g,SAKL0H04620g	YBL005W-B,YHR214C-B,YMR045C,YER160C,YLR035C-A,YDR210C-D,YNL054W-B,YDR365W-B,YJR029W,YNL284C-B,YGR027W-B,YDR098C-B,YJR027W,YLR227W-B,YAR009C,YPR137C-B,YOL103W-B,YPL257W-B,YER138C,YLR157C-B,YML039W,YGR038C-B,YGR161C-D,YOR142W-B,YDR034C-D,YOR192C-B,YBR012W-B,YMR050C,YOR343W-B,YDR210W-B,YPR158C-D,YDR261W-B,YML045W,YDR316W-B,YPR158W-B,YLR410W-B,YBL100W-B,YCL019W,YGR161W-B,YFL002W-A,YDR261C-D,YJL113W,Y…	Unknown name,Unknown name,Unknown name,Unknown name,Unknown name,Unknown name,Unknown name,Unknown name,Unknown name,Unknown name,Unknown name,Unknown name,Unknown name,Unknown name,Unknown name,Unknown name,Unknown name,Unknown name,Unknown name,Unknown name,Unknown name,Unknown name,Unknown name,Unknown name,Unknown name,Unknown name,Unknown name,Unknown name,Unknown name,Unknown name,Unknown n…	Retrotransposon TYA Gag and TYB Pol genes | Retrotransposon TYA Gag and TYB Pol genes | Retrotransposon TYA Gag and TYB Pol genes | Retrotransposon TYA Gag and TYB Pol genes | Retrotransposon TYA Gag and TYB Pol genes | Retrotransposon TYA Gag and TYB Pol genes | TyB Gag-Pol protein | Retrotransposon TYA Gag and TYB Pol genes | Retrotransposon TYA Gag and TYB Pol genes | Retrotransposon TYA Gag a…	-	-	-	-	13	1	0	0	0	26	3	4	3	6	LAWA0D02344g,LAWA0B01310g,LAWA0C10836g,LAWA0H00518g,LAWA0G04456g,LAWA0H11408g,LAWA0F07778g,LAWA0D05534g,LAWA0D13674g,LAWA0D03576g,LAWA0F13696g,LAWA0E06084g,LAWA0B13190g	KLTH0E17094g	-	-	-	LAFE0E05512g,LAFE0A00628g1_2,LAFE0H08460g,LAFE0E02740g,LAFE0H16644g,LAFE0H11870g1_2,LAFE0D01552g1_2,LAFE0G19218g,LAFE0F04852g1_2,LAFE0E05534g,LAFE0G11672g,LAFE0E04368g,LAFE0G07448g1_2,LAFE0E09494g1_2,LAFE0A02652g,LAFE0A00628g,LAFE0H16644g1_2,LAFE0A02652g1_2,LAFE0F04852g,LAFE0E04368g1_2,LAFE0E09494g,LAFE0G19218g1_2,LAFE0G07448g,LAFE0E02740g1_2,LAFE0H11870g,LAFE0E05512g1_2	LADA0H17414g,LADA0H13894g,LADA0H10308g	LANO0D06788g,LANO0F06392g,LANO0H07646g,LANO0E03048g	LAMI0D06524g,LAMI0E03092g,LAMI0G03180g	SAKL0D08206g1_2,SAKL0E01276g1_2,SAKL0H19756g1_2,SAKL0H04620g1_2,SAKL0D03520g,SAKL0F05830g
5	10	13	13	13	14	14	13	12	13	14	13	LAWA0B02916g,LAWA0E02278g,LAWA0D07338g,LAWA0H04324g,LAWA0E12816g,LAWA0G09428g,LAWA0F08614g,LAWA0H13256g,LAWA0F04214g,LAWA0A06128g	KLTH0D02354g,KLTH0E03476g,KLTH0E12870g,KLTH0H05566g,KLTH0A03410g,KLTH0G17028g,KLTH0D13046g,KLTH0G09196g,KLTH0G14498g,KLTH0H15158g,KLTH0C05038g,KLTH0G11132g,KLTH0H14300g	LAME0B02146g,LAME0F14004g,LAME0H07514g,LAME0B02806g,LAME0D05996g,LAME0E12948g,LAME0C08174g,LAME0A02586g,LAME0G09560g,LAME0F01772g,LAME0E12222g,LAME0G12002g,LAME0E02652g	LAFA0C08768g,LAFA0G18294g,LAFA0E10220g,LAFA0C08108g,LAFA0C03246g,LAFA0F20780g,LAFA0A05776g,LAFA0G17106g,LAFA0D10440g,LAFA0E06458g,LAFA0E20054g,LAFA0D04148g,LAFA0G16380g	LACI0F18052g,LACI0G17040g,LACI0F04082g,LACI0G12486g,LACI0D01860g,LACI0G20010g,LACI0D03444g,LACI0F17348g,LACI0F13300g,LACI0H13652g,LACI0G05270g,LACI0F15456g,LACI0E05094g,LACI0C03378g	LAFE0E12838g,LAFE0D10968g,LAFE0D07536g,LAFE0G14356g,LAFE0C05996g,LAFE0E12134g,LAFE0A03664g,LAFE0E04918g,LAFE0B05908g,LAFE0E10242g,LAFE0H10220g,LAFE0E06568g,LAFE0B07536g,LAFE0F11870g	LADA0F11782g,LADA0F07184g,LADA0D04346g,LADA0A05974g,LADA0F06568g,LADA0F01420g,LADA0A02652g,LADA0E09824g,LADA0G05094g,LADA0F04126g,LADA0H18140g,LADA0E11892g,LADA0H06414g	LANO0B05248g,LANO0C02366g,LANO0E08592g,LANO0H07778g,LANO0H17502g,LANO0B03114g,LANO0G17238g,LANO0F01596g,LANO0C03114g,LANO0F13036g,LANO0H05820g,LANO0G16402g	LAMI0F06634g,LAMI0C04060g,LAMI0E07470g,LAMI0F07910g,LAMI0G12816g,LAMI0C08416g,LAMI0A03752g,LAMI0H14818g,LAMI0C09384g,LAMI0G00848g,LAMI0B03576g,LAMI0E03114g,LAMI0H06766g	SAKL0E09658g,SAKL0B09988g,SAKL0G08074g,SAKL0H09724g,SAKL0A05918g,SAKL0H17974g,SAKL0B05544g,SAKL0H04532g,SAKL0F07766g,SAKL0E08910g,SAKL0B03388g,SAKL0E06886g,SAKL0D11198g,SAKL0D02772g	YDR334W,YAL019W,YPL082C,YFR038W,YOR304W,YOR290C,YBR245C,YIL126W,YER164W,YJR035W,YBR073W,YGL150C,YGL163C	SWR1,FUN30,MOT1,IRC5,ISW2,SNF2,ISW1,STH1,CHD1,RAD26,RDH54,INO80,RAD54	Swi2/Snf2-related ATPase that is the structural component of the SWR1 complex, which exchanges histone variant H2AZ (Htz1p) for chromatin-bound histone H2A | Snf2p family member with ATP-dependent chromatin remodeling activity | Essential protein involved in regulation of transcription | Putative ATPase containing the DEAD/H helicase-related sequence motif | ATP-dependent DNA translocase involved…	nucleolus (x1) | cytoplasm (x6) | unknown (x5) | nucleus (x3) | mitochondrion (x2) | chromosome (x12)	transcription factor binding (x11) | DNA binding (x9) | histone binding (x2) | unknown (x3) | structural molecule activity (x1) | helicase activity (x1) | ATPase activity (x2)	histone modification (x4) | mitotic cell cycle (x7) | DNA replication (x2) | carbohydrate metabolic process (x3) | chromosome segregation (x3) | oligosaccharide metabolic process (x3) | protein acylation (x1) | DNA-dependent transcription, elongation (x9) | response to starvation (x2) | protein complex biogenesis (x1) | regulation of organelle organization (x1) | protein modification by small pro…	-	3	0	0	0	0	0	0	1	0	0	LAWA0F12222g,LAWA0H04060g,LAWA0H12420g	-	-	-	-	-	-	LANO0C05578g	-	-
6	8	11	11	11	11	11	11	11	11	11	12	LAWA0C11210g,LAWA0C06920g,LAWA0A02916g,LAWA0A12596g,LAWA0A08812g,LAWA0E09032g,LAWA0F10330g,LAWA0G11056g	KLTH0B03278g,KLTH0F07106g,KLTH0C08866g,KLTH0H00638g,KLTH0H04466g,KLTH0D09328g,KLTH0E10890g,KLTH0D09746g,KLTH0H05852g,KLTH0A02244g,KLTH0H08646g	LAME0C02960g,LAME0G06480g,LAME0F05908g,LAME0B07734g,LAME0B03950g,LAME0H09428g,LAME0H13080g,LAME0H13454g,LAME0C07888g,LAME0A03708g,LAME0C05160g	LAFA0B02630g,LAFA0G06634g,LAFA0F04016g,LAFA0G24124g,LAFA0G20318g,LAFA0E12156g,LAFA0C06260g,LAFA0E18052g,LAFA0A04434g,LAFA0C03554g,LAFA0E17524g	LACI0A02916g,LACI0D06524g,LACI0E03114g,LACI0D00672g,LACI0H19922g,LACI0G21088g,LACI0H08152g,LACI0G08482g,LACI0G19724g,LACI0D02982g,LACI0H15368g	LAFE0A06238g,LAFE0B10726g,LAFE0E02916g,LAFE0H00958g,LAFE0F06282g,LAFE0C04896g,LAFE0H04654g,LAFE0G10154g,LAFE0B07074g,LAFE0C06282g,LAFE0H12068g	LADA0D10264g,LADA0E03796g,LADA0B00628g,LADA0B08152g,LADA0G02608g,LADA0C08702g,LADA0C08328g,LADA0D06260g,LADA0A07030g,LADA0A02960g,LADA0F08900g	LANO0E14466g,LANO0G06546g,LANO0A04544g,LANO0E00606g,LANO0E04390g,LANO0H13850g,LANO0E10528g,LANO0H14246g,LANO0B02036g,LANO0F01882g,LANO0F04610g	LAMI0H08922g,LAMI0H03180g,LAMI0H19394g,LAMI0E00474g,LAMI0G10616g,LAMI0H05182g,LAMI0B02278g,LAMI0C10110g,LAMI0F12882g,LAMI0F08196g,LAMI0H13300g	SAKL0G12760g,SAKL0G09328g,SAKL0H02178g,SAKL0C08778g,SAKL0H11968g,SAKL0E10670g,SAKL0H08162g,SAKL0A04752g,SAKL0B02794g,SAKL0A06204g,SAKL0H20218g	YLL008W,YHR065C,YHR169W,YDL031W,YNL112W,YGL078C,YDR243C,YPL119C,YOR204W,YFL002C,YBR237W,YGL171W	DRS1,RRP3,DBP8,DBP10,DBP2,DBP3,PRP28,DBP1,DED1,SPB4,PRP5,ROK1	Nucleolar DEAD-box protein required for ribosome assembly and function, including synthesis of 60S ribosomal subunits | Protein involved in rRNA processing | ATPase, putative RNA helicase of the DEAD-box family | Putative ATP-dependent RNA helicase of the DEAD-box protein family, constituent of 66S pre-ribosomal particles | ATP-dependent RNA helicase of the DEAD-box protein family | RNA-Dependent…	mitochondrion (x3) | cytoplasm (x1) | nucleolus (x7) | nucleus (x10)	RNA binding (x11) | helicase activity (x1) | ATPase activity (x11)	organelle assembly (x1) | RNA catabolic process (x2) | RNA splicing (x2) | rRNA processing (x2) | mRNA processing (x8) | ribosomal large subunit biogenesis (x4) | ribosome assembly (x3) | translational initiation (x2) | ribosomal small subunit biogenesis (x2)	-	3	0	0	0	0	0	0	0	0	0	LAWA0H04610g,LAWA0H07140g,LAWA0E09428g	-	-	-	-	-	-	-	-	-
7	3	6	1	4	4	4	2	5	2	8	9	LAWA0H00804g,LAWA0B00122g,LAWA0B00166g	KLTH0C00440g,KLTH0D18194g,KLTH0D17006g,KLTH0F19888g,KLTH0C11924g,KLTH0E00242g	LAME0A08130g	LAFA0F22364g,LAFA0C10682g,LAFA0F06502g,LAFA0F22540g	LACI0F08130g,LACI0F00144g,LACI0D12618g,LACI0D12640g	LAFE0H00540g,LAFE0D00232g,LAFE0E00342g,LAFE0B00364g	LADA0G16644g,LADA0G16666g	LANO0F17502g,LANO0F17678g,LANO0E00210g,LANO0B08592g,LANO0E00166g	LAMI0A06524g,LAMI0H04258g	SAKL0H00286g,SAKL0H00176g,SAKL0G19910g,SAKL0H21362g,SAKL0A02200g,SAKL0C09130g,SAKL0D00176g,SAKL0H21340g	YAR050W,YAL063C,YHR211W,YKR102W,YHR213W,YAR062W,YAL064C-A,YFL051C,YAL065C	FLO1,FLO9,FLO5,FLO10,Unknown name,Unknown name,TDA8,Unknown name,Unknown name	Lectin-like protein involved in flocculation, cell wall protein that binds to mannose chains on the surface of other cells, confers floc-forming ability that is chymotrypsin sensitive and heat resistant | Lectin-like protein with similarity to Flo1p, thought to be expressed and involved in flocculation | Lectin-like cell wall protein (flocculin) involved in flocculation, binds to mannose chains o…	cell wall (x4) | unknown (x4)	unknown (x4) | other (x4)	other (x4) | invasive growth in response to glucose limitation (x1) | unknown (x3)	-	8	4	12	2	7	5	2	4	5	1	LAWA0D01464g,LAWA0B12926g,LAWA0D01442g,LAWA0F15632g,LAWA0F00100g,LAWA0A00100g,LAWA0F15654g,LAWA0B00144g	KLTH0D17050pg,KLTH0H00176pg,KLTH0F00154pg,KLTH0F19910pg	LAME0E13806g,LAME0E13762g,LAME0D11452g,LAME0C00320g,LAME0E00100g,LAME0E13740g,LAME0C09736g,LAME0E13784g,LAME0E00232g,LAME0F17524g,LAME0D00100g,LAME0E00210g	LAFA0F06524g,LAFA0F00452g	LACI0A03752g,LACI0E00408g,LACI0F08152g,LACI0H00188g,LACI0G00144g,LACI0D00100g,LACI0G25378g	LAFE0B12684g,LAFE0B12662g,LAFE0A00298g,LAFE0D03642g,LAFE0D03664g	LADA0D00100g,LADA0C12926g	LANO0F17524g,LANO0B00430g,LANO0A00122g,LANO0F00276g	LAMI0G16138g,LAMI0D13454g,LAMI0A03620g,LAMI0D00144g,LAMI0D06766g	SAKL0C09482pg
8	5	7	7	5	13	10	11	9	10	5	2	LAWA0D03026g,LAWA0E00188g,LAWA0C11804g,LAWA0G02982g,LAWA0D00298g	KLTH0E03234g,KLTH0B10384g,KLTH0D15378g,KLTH0E16588g,KLTH0B02750g,KLTH0F09042g,KLTH0A07832g	LAME0F20296g,LAME0E07976g,LAME0A08064g,LAME0C00210g,LAME0E04214g,LAME0C02476g,LAME0B08064g	LAFA0F00650g,LAFA0D17326g,LAFA0F12420g,LAFA0G08548g,LAFA0B02146g	LACI0A00254g,LACI0H25664g,LACI0A00584g,LACI0G03070g,LACI0H25840g,LACI0H03158g,LACI0H03136g,LACI0E03378g,LACI0A03444g,LACI0H25708g,LACI0B00254g,LACI0B00276g,LACI0H10440g	LAFE0F01728g,LAFE0A02982g,LAFE0G10242g,LAFE0B03268g,LAFE0B00254g,LAFE0A05688g,LAFE0F01684g,LAFE0H06942g,LAFE0C13234g,LAFE0H00364g	LADA0E00298g,LADA0B06414g,LADA0C08306g,LADA0E00166g,LADA0G09340g,LADA0D13190g,LADA0B00188g,LADA0C01486g,LADA0D10704g,LADA0B06480g,LADA0B00870g	LANO0A02806g,LANO0H25158g,LANO0G12354g,LANO0E16930g,LANO0F12398g,LANO0E00232g,LANO0E14928g,LANO0A02916g,LANO0H15280g	LAMI0A00320g,LAMI0H02102g,LAMI0D00166g,LAMI0D00342g,LAMI0B09054g,LAMI0E05072g,LAMI0H09384g,LAMI0B05930g,LAMI0H17964g,LAMI0E01706g	SAKL0G16456g,SAKL0C00352g,SAKL0G12166g,SAKL0B10120g,SAKL0C02156g	YJR152W,YLR004C	DAL5,THI73	Allantoate permease | Putative plasma membrane permease proposed to be involved in carboxylic acid uptake and repressed by thiamine	cytoplasm (x1) | plasma membrane (x1) | endoplasmic reticulum (x2) | membrane (x1)	other (x1) | transmembrane transporter activity (x1)	ion transport (x1) | other (x1)	-	0	3	0	0	1	0	2	2	2	0	-	KLTH0E16918pg,KLTH0B00242pg,KLTH0E16973pg	-	-	LACI0G00254g	-	LADA0C00188g,LADA0B00254g	LANO0B08724g,LANO0D08240g	LAMI0B08702g,LAMI0D00100g	-
9	7	8	8	8	8	8	8	8	8	8	13	LAWA0C06964g,LAWA0H07008g,LAWA0G00760g,LAWA0F05710g,LAWA0G08438g,LAWA0C06810g,LAWA0F12992g	KLTH0F07150g,KLTH0H08448g,KLTH0C06556g,KLTH0G07810g,KLTH0B07744g,KLTH0F06996g,KLTH0D13530g,KLTH0E13662g	LAME0G06524g,LAME0D07250g,LAME0C05314g,LAME0F11144g,LAME0F16050g,LAME0G06392g,LAME0F02234g,LAME0D09230g	LAFA0G06678g,LAFA0F19504g,LAFA0E17678g,LAFA0D05556g,LAFA0F15280g,LAFA0G06546g,LAFA0D09978g,LAFA0F17502g	LACI0D06480g,LACI0H15192g,LACI0H01200g,LACI0F11518g,LACI0H06436g,LACI0D06612g,LACI0G04808g,LACI0G13366g	LAFE0B10682g,LAFE0H11892g,LAFE0A05358g,LAFE0B01376g,LAFE0H02938g,LAFE0B10814g,LAFE0E07030g,LAFE0G15236g	LADA0H10858g,LADA0F09054g,LADA0H09054g,LADA0E08548g,LADA0G06898g,LADA0E03708g,LADA0E11782g,LADA0D03510g	LANO0G06590g,LANO0F04456g,LANO0H09032g,LANO0F11474g,LANO0H04456g,LANO0H17964g,LANO0G06458g,LANO0E07734g	LAMI0H03224g,LAMI0H13124g,LAMI0F12178g,LAMI0D05358g,LAMI0F14268g,LAMI0H03092g,LAMI0A03246g,LAMI0E08284g	SAKL0G09416g,SAKL0H20020g,SAKL0G11792g,SAKL0F12606g,SAKL0E13618g,SAKL0D11638g,SAKL0H04004g,SAKL0H08822g	YHR064C,YER103W,YAL005C,YLL024C,YBL075C,YJL034W,YDL229W,YNL209W,YJR045C,YEL030W,YLR369W,YPL106C,YBR169C	SSZ1,SSA4,SSA1,SSA2,SSA3,KAR2,SSB1,SSB2,SSC1,ECM10,SSQ1,SSE1,SSE2	Hsp70 protein that interacts with Zuo1p (a DnaJ homolog) to form a ribosome-associated complex that binds the ribosome via the Zuo1p subunit | Heat shock protein that is highly induced upon stress | ATPase involved in protein folding and NLS-directed nuclear transport | ATP binding protein involved in protein folding and vacuolar import of proteins | ATPase involved in protein folding and the res…	mitochondrial envelope (x2) | cytoplasm (x13) | endoplasmic reticulum (x1) | vacuole (x5) | nucleus (x1) | membrane (x4) | mitochondrion (x2) | cell wall (x4) | plasma membrane (x2)	unknown (x8) | ion binding (x3) | enzyme regulator activity (x2) | ATPase activity (x1) | unfolded protein binding (x9)	response to chemical stimulus (x1) | organelle fusion (x1) | rRNA processing (x4) | translational elongation (x3) | ribosomal subunit export from nucleus (x3) | proteolysis involved in cellular protein catabolic process (x1) | cellular ion homeostasis (x1) | conjugation (x10) | protein folding (x1) | nucleus organization (x7) | protein targeting (x1) | regulation of translation (x3) | response to…	-	1	0	0	0	0	0	0	0	0	0	LAWA0E13322g	-	-	-	-	-	-	-	-	-
10	1	3	2	11	0	1	3	2	9	1	0	LAWA0H00232g	KLTH0H03344g,KLTH0D01276g,KLTH0G19426g	LAME0B01134g,LAME0C00782g	LAFA0G01464g,LAFA0F20670g,LAFA0A03994g,LAFA0F00408g,LAFA0G11430g,LAFA0D01222g,LAFA0F20318g,LAFA0B00496g,LAFA0E03884g,LAFA0C09758g,LAFA0B00518g	-	LAFE0G09120g	LADA0D12684g,LADA0H17370g,LADA0F08174g	LANO0C01288g,LANO0E16490g	LAMI0H06260g,LAMI0G15764g,LAMI0C01266g,LAMI0G14928g,LAMI0D03598g,LAMI0F15368g,LAMI0C10330g,LAMI0B08504g,LAMI0F05600g	SAKL0C04158g	-	-	-	-	-	-	-	6	1	8	13	0	0	1	0	12	4	LAWA0G08680g,LAWA0D13564g,LAWA0D09824g,LAWA0C06722g,LAWA0E01222g,LAWA0A06876g	KLTH0F04059g	LAME0D10704g,LAME0D10132g,LAME0G18690g,LAME0D10836g,LAME0D11430g,LAME0A00452g,LAME0E11452g,LAME0C00848g	LAFA0F06106g,LAFA0F00276g,LAFA0C00232g,LAFA0E00804g,LAFA0E06436g,LAFA0F05600g,LAFA0G22804g,LAFA0A01684g,LAFA0G12882g,LAFA0C04434g,LAFA0F00342g,LAFA0C10693g,LAFA0E09561g	-	-	LADA0D09604g	-	LAMI0E00144g,LAMI0E00716g,LAMI0A08328g,LAMI0G15874g,LAMI0C08328g,LAMI0G15852g,LAMI0E09032g,LAMI0C02960g,LAMI0F15632g,LAMI0H17942g,LAMI0G15786g,LAMI0B00188g	SAKL0E09174g,SAKL0H00264g,SAKL0G00154g,SAKL0B12804g
11	7	7	7	7	7	7	7	7	7	7	7	LAWA0D06018g,LAWA0B11012g,LAWA0H05006g,LAWA0B07008g,LAWA0C09824g,LAWA0G15852g,LAWA0D03070g	KLTH0E09218g,KLTH0F17974g,KLTH0F13772g,KLTH0H06204g,KLTH0B04664g,KLTH0A05918g,KLTH0D15334g	LAME0F17898g,LAME0D01090g,LAME0F08966g,LAME0C07492g,LAME0H14466g,LAME0C04258g,LAME0F07580g	LAFA0F11474g,LAFA0D16402g,LAFA0D07800g,LAFA0C03994g,LAFA0F14312g,LAFA0B03928g,LAFA0D09230g	LACI0B02344g,LACI0H20714g,LACI0H24696g,LACI0G19284g,LACI0G23486g,LACI0H04940g,LACI0G03114g	LAFE0C10462g,LAFE0F01288g,LAFE0F05512g,LAFE0C06678g,LAFE0C02366g,LAFE0H01464g,LAFE0A03026g	LADA0E02080g,LADA0A01156g,LADA0B05512g,LADA0A03378g,LADA0B05930g,LADA0D08900g,LADA0E12508g	LANO0H02674g,LANO0H24168g,LANO0H20186g,LANO0F02278g,LANO0E13168g,LANO0A02322g,LANO0H18756g	LAMI0G00166g,LAMI0H10132g,LAMI0A06898g,LAMI0F08614g,LAMI0C01750g,LAMI0E00980g,LAMI0A01530g	SAKL0E04532g,SAKL0G00528g,SAKL0F04026g,SAKL0A06710g,SAKL0A02178g,SAKL0G18832g,SAKL0G16390g	YMR128W,YER013W,YKR086W,YGL120C,YNR011C,YKL078W,YLR419W	ECM16,PRP22,PRP16,PRP43,PRP2,DHR2,Unknown name	Essential DEAH-box ATP-dependent RNA helicase specific to the U3 snoRNP, predominantly nucleolar in distribution, required for 18S rRNA synthesis | DEAH-box RNA-dependent ATPase/ATP-dependent RNA helicase, associates with lariat intermediates before the second catalytic step of splicing | DEAH-box RNA helicase involved in second catalytic step of splicing | RNA helicase in the DEAH-box family, fu…	mitochondrion (x3) | cytoplasm (x3) | nucleolus (x2) | nucleus (x6)	helicase activity (x4) | unknown (x4) | ATPase activity (x1)	RNA splicing (x4) | rRNA processing (x1) | mRNA processing (x4) | ribosomal large subunit biogenesis (x3) | unknown (x1) | ribosomal small subunit biogenesis (x3)	-	0	0	0	0	0	0	0	0	0	0	-	-	-	-	-	-	-	-	-	-
12	6	7	7	7	8	9	7	6	6	7	6	LAWA0G14752g,LAWA0E00540g,LAWA0G03598g,LAWA0G03576g,LAWA0F11584g,LAWA0A04500g	KLTH0A04796g,KLTH0F09680g,KLTH0D00682g,KLTH0F09658g,KLTH0E12210g,KLTH0G16126g,KLTH0H08162g	LAME0F13432g,LAME0B00496g,LAME0E04808g,LAME0H08130g,LAME0E04786g,LAME0G11144g,LAME0C05534g	LAFA0G09142g,LAFA0B06744g,LAFA0C10418g,LAFA0G09120g,LAFA0E10858g,LAFA0E14818g,LAFA0C06018g	LACI0H04434g,LACI0F14884g,LACI0G18778g,LACI0F14906g,LACI0H14972g,LACI0G11804g,LACI0B03862g,LACI0G17986g	LAFE0E09670g,LAFE0B04544g,LAFE0E09692g,LAFE0D12750g,LAFE0G13674g,LAFE0G13696g,LAFE0H11650g,LAFE0C08988g,LAFE0D11936g	LADA0C02080g,LADA0F10506g,LADA0A08944g,LADA0C02058g,LADA0D04962g,LADA0F05798g,LADA0F09274g	LANO0B06590g,LANO0G09142g,LANO0G09120g,LANO0E09230g,LANO0C00606g,LANO0C03928g	LAMI0E10462g,LAMI0E02586g,LAMI0H00232g,LAMI0E02608g,LAMI0H12904g,LAMI0C07162g	SAKL0E06358g,SAKL0E06380g,SAKL0D14806g,SAKL0F09108g,SAKL0H10252g,SAKL0H19514g,SAKL0C10824g	YER073W,YOR374W,YMR169C,YMR170C,YPL061W,YBR006W	ALD5,ALD4,ALD3,ALD2,ALD6,UGA2	Mitochondrial aldehyde dehydrogenase, involved in regulation or biosynthesis of electron transport chain components and acetate formation | Mitochondrial aldehyde dehydrogenase, required for growth on ethanol and conversion of acetaldehyde to acetate | Cytoplasmic aldehyde dehydrogenase, involved in beta-alanine synthesis | Cytoplasmic aldehyde dehydrogenase, involved in ethanol oxidation and bet…	mitochondrion (x6) | cytoplasm (x3)	oxidoreductase activity (x6)	response to chemical stimulus (x3) | cellular amino acid metabolic process (x2) | cofactor metabolic process (x2) | response to osmotic stress (x1) | nucleobase-containing small molecule metabolic process (x1) | other (x1) | response to oxidative stress (x1)	-	0	0	0	0	0	0	0	0	1	0	-	-	-	-	-	-	-	-	LAMI0E06854g	-
13	6	7	7	7	7	7	7	7	7	7	6	LAWA0B11606g,LAWA0C05446g,LAWA0B11628g,LAWA0G09802g,LAWA0G01926g,LAWA0C07668g	KLTH0F18590g,KLTH0G08294g,KLTH0F18612g,KLTH0G09548g,KLTH0F05698g,KLTH0F07920g,KLTH0B06996g	LAME0F14950g,LAME0F14972g,LAME0D06788g,LAME0D05710g,LAME0G05160g,LAME0H01992g,LAME0F16798g	LAFA0G19262g,LAFA0G05270g,LAFA0G19284g,LAFA0F21066g,LAFA0G07426g,LAFA0F19966g,LAFA0F14576g	LACI0F01794g,LACI0F17040g,LACI0F01772g,LACI0E07998g,LACI0F18206g,LACI0H09164g,LACI0H07162g	LAFE0G17744g,LAFE0E11826g,LAFE0G17766g,LAFE0E12970g,LAFE0G05446g,LAFE0H05666g,LAFE0H03686g	LADA0E03840g,LADA0E05292g,LADA0E03818g,LADA0E09010g,LADA0E10132g,LADA0C00364g,LADA0E03048g	LANO0G05182g,LANO0E05446g,LANO0E05424g,LANO0H07448g,LANO0G07338g,LANO0H08548g,LANO0H03730g	LAMI0F03158g,LAMI0F03136g,LAMI0C08086g,LAMI0F09714g,LAMI0H19306g,LAMI0G14048g,LAMI0H00408g	SAKL0F15620g,SAKL0F15642g,SAKL0C06424g,SAKL0E08558g,SAKL0E09834g,SAKL0H13068g,SAKL0E12848g	YIL118W,YKR055W,YPR165W,YNL090W,YLR229C,YNL180C	RHO3,RHO4,RHO1,RHO2,CDC42,RHO5	Non-essential small GTPase of the Rho/Rac subfamily of Ras-like proteins involved in the establishment of cell polarity | Non-essential small GTPase of the Rho/Rac subfamily of Ras-like proteins, likely to be involved in the establishment of cell polarity | GTP-binding protein of the rho subfamily of Ras-like proteins, involved in establishment of cell polarity | Non-essential small GTPase of the…	mitochondrial envelope (x1) | Golgi apparatus (x4) | site of polarized growth (x4) | cytoplasm (x2) | peroxisome (x6) | endomembrane system (x1) | vacuole (x1) | nucleus (x2) | membrane (x1) | mitochondrion (x5) | cellular bud (x3) | plasma membrane (x2)	signal transducer activity (x6) | GTPase activity (x1) | ion binding (x2)	organelle fission (x1) | mitotic cell cycle (x2) | vacuole organization (x1) | cell budding (x2) | regulation of organelle organization (x1) | carbohydrate metabolic process (x4) | conjugation (x1) | endocytosis (x2) | membrane fusion (x1) | regulation of cell cycle (x2) | invasive growth in response to glucose limitation (x1) | response to chemical stimulus (x1) | signaling (x1) | regulation of …	-	0	0	0	0	0	0	0	0	0	0	-	-	-	-	-	-	-	-	-	-
14	5	6	6	6	6	6	6	6	6	6	6	LAWA0F06920g,LAWA0E03862g,LAWA0B09274g,LAWA0G00474g,LAWA0E11562g	KLTH0G16698g,KLTH0G02662g,KLTH0D03806g,KLTH0F16214g,KLTH0G07524g,KLTH0D11990g	LAME0B03004g,LAME0H18844g,LAME0A05226g,LAME0D02806g,LAME0D07514g,LAME0H02542g	LAFA0C07888g,LAFA0D02542g,LAFA0A03180g,LAFA0D14708g,LAFA0F19240g,LAFA0B04962g	LACI0B03246g,LACI0C07470g,LACI0F10176g,LACI0H22980g,LACI0F11804g,LACI0G06260g	LAFE0C09604g,LAFE0F15962g,LAFE0D01706g,LAFE0F03136g,LAFE0A05094g,LAFE0G07932g	LADA0F06370g,LADA0G14400g,LADA0C09494g,LADA0B03268g,LADA0E08284g,LADA0C06150g	LANO0C03334g,LANO0D02586g,LANO0D08130g,LANO0H22430g,LANO0H09296g,LANO0H16534g	LAMI0C01376g,LAMI0D10572g,LAMI0G05930g,LAMI0E13674g,LAMI0F11892g,LAMI0F03642g	SAKL0C11440g,SAKL0G03828g,SAKL0H23672g,SAKL0G02376g,SAKL0G11484g,SAKL0H05764g	YDL007W,YDR394W,YGL048C,YOR117W,YKL145W,YOR259C	RPT2,RPT3,RPT6,RPT5,RPT1,RPT4	One of six ATPases of the 19S regulatory particle of the 26S proteasome involved in the degradation of ubiquitinated substrates | One of six ATPases of the 19S regulatory particle of the 26S proteasome involved in the degradation of ubiquitinated substrates | ATPase of the 19S regulatory particle of the 26S proteasome | One of six ATPases of the 19S regulatory particle of the 26S proteasome invol…	cytoplasm (x1) | other (x3) | nucleus (x3)	ATPase activity (x6)	transcription from RNA polymerase II promoter (x2) | DNA-dependent transcription, initiation (x2) | chromatin organization (x5) | DNA-dependent transcription, elongation (x1) | protein complex biogenesis (x6) | proteolysis involved in cellular protein catabolic process (x6) | DNA repair (x2) | response to DNA damage stimulus (x5)	-	1	0	0	0	0	0	0	0	0	0	LAWA0D11276g	-	-	-	-	-	-	-	-	-
15	6	6	6	6	6	6	6	6	6	6	6	LAWA0G15258g,LAWA0G07096g,LAWA0B05226g,LAWA0G06722g,LAWA0B12684g,LAWA0F01772g	KLTH0A05324g,KLTH0B09130g,KLTH0E06006g,KLTH0D14586g,KLTH0F19646g,KLTH0C02684g	LAME0F14708g,LAME0H01134g,LAME0H16776g,LAME0E07734g,LAME0C09208g,LAME0D04500g	LAFA0G19020g,LAFA0E01200g,LAFA0D12332g,LAFA0G12046g,LAFA0C02190g,LAFA0E03466g	LACI0H03862g,LACI0F19416g,LACI0G03818g,LACI0F06766g,LACI0F00694g,LACI0D07492g	LAFE0B03972g,LAFE0E14114g,LAFE0D05006g,LAFE0E08020g,LAFE0G18800g,LAFE0C11650g	LADA0F11056g,LADA0B01618g,LADA0G03136g,LADA0H13476g,LADA0D00342g,LADA0B02586g	LANO0B06018g,LANO0C08702g,LANO0F09098g,LANO0G12112g,LANO0F00518g,LANO0F15280g	LAMI0E11034g,LAMI0F15676g,LAMI0F05094g,LAMI0A02234g,LAMI0C00518g,LAMI0G03334g	SAKL0F09834g,SAKL0H01276g,SAKL0H02750g,SAKL0H25630g,SAKL0C13684g,SAKL0D12606g	YDL126C,YLL034C,YGR270W,YLR397C,YNL329C,YKL197C	CDC48,RIX7,YTA7,AFG2,PEX6,PEX1	AAA ATPase involved in multiple processes | Putative ATPase of the AAA family, required for export of pre-ribosomal large subunits from the nucleus | Protein that localizes to chromatin and has a role in regulation of histone gene expression | ATPase of the CDC48/PAS1/SEC18 (AAA) family, forms a hexameric complex | AAA-peroxin that heterodimerizes with AAA-peroxin Pex1p and participates in the re…	nucleolus (x4) | mitochondrial envelope (x2) | site of polarized growth (x2) | cytoplasm (x3) | peroxisome (x1) | endoplasmic reticulum (x1) | endomembrane system (x1) | other (x3) | nucleus (x1) | membrane (x2) | mitochondrion (x1)	histone binding (x5) | small conjugating protein binding (x1) | ATPase activity (x1)	mitotic cell cycle (x1) | organelle fusion (x1) | organelle fission (x1) | response to chemical stimulus (x1) | ribosomal subunit export from nucleus (x1) | chromosome segregation (x1) | ribosomal large subunit biogenesis (x1) | protein targeting (x1) | membrane fusion (x2) | response to starvation (x2) | signaling (x1) | proteolysis involved in cellular protein catabolic process (x2) | nuclear t…	-	0	0	0	0	0	0	0	0	0	0	-	-	-	-	-	-	-	-	-	-
16	6	6	6	6	6	5	6	6	6	6	6	LAWA0A05336g,LAWA0H07184g,LAWA0H06832g,LAWA0F11716g,LAWA0F02674g,LAWA0D11936g	KLTH0G15268g,KLTH0H08690g,KLTH0H08118g,KLTH0E12342g,KLTH0C03520g,KLTH0G02068g	LAME0G10374g,LAME0C05116g,LAME0C05578g,LAME0D05204g,LAME0H07998g,LAME0H19372g	LAFA0E15632g,LAFA0E17480g,LAFA0E02080g,LAFA0C05974g,LAFA0E10726g,LAFA0D02014g	LACI0B04676g,LACI0H15434g,LACI0G11936g,LACI0D06678g,LACI0H14928g,LACI0C07954g	LAFE0C08174g,LAFE0G13828g,LAFE0H11606g,LAFE0B10880g,LAFE0F16446g	LADA0F04984g,LADA0F08856g,LADA0F09318g,LADA0H04918g,LADA0D04830g,LADA0G14906g	LANO0C04742g,LANO0F04654g,LANO0F04214g,LANO0F14510g,LANO0E09098g,LANO0D02058g	LAMI0C06326g,LAMI0H13344g,LAMI0H12860g,LAMI0D08900g,LAMI0E06964g,LAMI0F11606g	SAKL0A08162g,SAKL0H20284g,SAKL0D11704g,SAKL0H19470g,SAKL0H10406g,SAKL0F02244g	YLR274W,YPR019W,YBL023C,YEL032W,YBR202W,YGL201C	MCM5,MCM4,MCM2,MCM3,MCM7,MCM6	Component of the hexameric MCM complex, which is important for priming origins of DNA replication in G1 and becomes an active ATP-dependent helicase that promotes DNA melting and elongation when activated by Cdc7p-Dbf4p in S-phase | Essential helicase component of heterohexameric MCM2-7 complexes which bind pre-replication complexes on DNA and melt DNA prior to replication | Protein involved in D…	cytoplasm (x6) | nucleus (x6) | chromosome (x6)	protein binding transcription factor activity (x4) | helicase activity (x6) | DNA binding (x6) | ion binding (x1) | ATPase activity (x1)	mitotic cell cycle (x6) | regulation of DNA metabolic process (x6) | chromatin organization (x6) | response to DNA damage stimulus (x1) | DNA repair (x6) | DNA recombination (x1) | DNA replication (x6) | transcription from RNA polymerase II promoter (x1)	-	0	0	0	0	0	1	0	0	0	0	-	-	-	-	-	LAFE0H12134g	-	-	-	-
17	5	5	5	4	7	7	6	5	5	8	9	LAWA0C05314g,LAWA0F11518g,LAWA0G00892g,LAWA0F11166g,LAWA0F09010g	KLTH0F05566g,KLTH0E12144g,KLTH0G07942g,KLTH0E11726g,KLTH0G10714g	LAME0G05028g,LAME0D07118g,LAME0H08196g,LAME0H08614g,LAME0G12376g	LAFA0G05138g,LAFA0E10924g,LAFA0F19636g,LAFA0E11320g	LACI0E08130g,LACI0F18536g,LACI0G11738g,LACI0G11298g,LACI0G11320g,LACI0G12156g,LACI0F15852g	LAFE0G05314g,LAFE0E13300g,LAFE0G13608g,LAFE0G13168g,LAFE0G13190g,LAFE0G14026g,LAFE0E10616g	LADA0E05160g,LADA0E08680g,LADA0D05028g,LADA0D05468g,LADA0F01772g,LADA0E11320g	LANO0G05050g,LANO0E09296g,LANO0H08900g,LANO0E09714g,LANO0H06216g	LAMI0G13916g,LAMI0F09406g,LAMI0E06788g,LAMI0H07448g,LAMI0E03598g	SAKL0C06292g,SAKL0H10494g,SAKL0E10164g,SAKL0H10956g,SAKL0A09152g,SAKL0H10054g,SAKL0E07282g,SAKL0H24728g	YKR061W,YJL139C,YOR099W,YBR205W,YDR483W,YBR199W,YIL085C,YNL029C,YPL053C	KTR2,YUR1,KTR1,KTR3,KRE2,KTR4,KTR7,KTR5,KTR6	Mannosyltransferase involved in N-linked protein glycosylation | Mannosyltransferase involved in protein N-glycosylation | Alpha-1,2-mannosyltransferase | Putative alpha-1,2-mannosyltransferase | Alpha1,2-mannosyltransferase of the Golgi | Putative mannosyltransferase involved in protein glycosylation | Putative mannosyltransferase involved in protein glycosylation | Putative mannosyltransferase …	vacuole (x7) | cytoplasm (x8) | nucleus (x3) | Golgi apparatus (x1) | membrane (x2)	transferase activity, transferring glycosyl groups (x1) | other (x8)	cell wall organization or biogenesis (x9) | protein glycosylation (x7) | carbohydrate metabolic process (x3) | oligosaccharide metabolic process (x9)	-	0	0	0	0	0	0	0	0	0	0	-	-	-	-	-	-	-	-	-	-
18	4	5	5	8	5	4	8	5	10	4	4	LAWA0B00408g,LAWA0G09538g,LAWA0B05380g,LAWA0E11892g	KLTH0H09856g,KLTH0E00528g,KLTH0E06138g,KLTH0G06754g,KLTH0D12320g	LAME0D00210g,LAME0C09450g,LAME0C04940g,LAME0H16644g,LAME0H09494g	LAFA0D17282g,LAFA0F12222g,LAFA0F04984g,LAFA0B04632g,LAFA0E12222g,LAFA0F22518g,LAFA0D12222g,LAFA0E16358g	LACI0B00166g,LACI0A00738g,LACI0B00232g,LACI0F06898g,LACI0G05930g	LAFE0B12640g,LAFE0H00144g,LAFE0D04874g,LAFE0E05908g	LADA0E09934g,LADA0A00210g,LADA0B11628g,LADA0E15016g,LADA0E07558g,LADA0G03268g,LADA0G00210g,LADA0F15830g	LANO0H07668g,LANO0H25114g,LANO0H10044g,LANO0F08966g,LANO0H16864g	LAMI0C10572g,LAMI0C10968g,LAMI0A08746g,LAMI0E01640g,LAMI0F00122g,LAMI0D03576g,LAMI0C01530g,LAMI0A04456g,LAMI0B00166g,LAMI0E13366g	SAKL0G10758g,SAKL0B12628g,SAKL0H25498g,SAKL0H05412g	YBR008C,YHR048W,YOR273C,YLL028W	FLR1,YHK8,TPO4,TPO1	Plasma membrane transporter of the major facilitator superfamily | Presumed antiporter of the major facilitator superfamily | Polyamine transporter of the major facilitator superfamily | Polyamine transporter of the major facilitator superfamily	cytoplasm (x1) | vacuole (x3) | nucleus (x4) | membrane (x1) | cellular bud (x3) | plasma membrane (x2)	unknown (x1) | transmembrane transporter activity (x1) | other (x2)	ion transport (x2) | response to chemical stimulus (x2) | transmembrane transport (x1)	-	0	1	0	0	0	0	1	0	0	0	-	KLTH0G09328pg	-	-	-	-	LADA0C05820g	-	-	-
19	6	9	2	3	4	5	3	5	3	6	6	LAWA0A00166g,LAWA0H00254g,LAWA0G11584g,LAWA0G09758g,LAWA0G00210g,LAWA0H14422g	KLTH0D18150g,KLTH0G09504g,KLTH0A01562g,KLTH0B00110g,KLTH0D00506g,KLTH0G00198g,KLTH0D00110g,KLTH0B10450g,KLTH0A07964g	LAME0C00276g,LAME0G20186g	LAFA0F22562g,LAFA0F00826g,LAFA0E21902g	LACI0D11606g,LACI0A00870g,LACI0D00298g,LACI0A00320g	LAFE0A08196g,LAFE0H16600g,LAFE0C13872g,LAFE0H00452g,LAFE0A00166g	LADA0E00738g,LADA0G16622g,LADA0D13388g	LANO0D00188g,LANO0H01222g,LANO0C09692g,LANO0G18448g,LANO0C00386g	LAMI0H00100g,LAMI0F13410g,LAMI0F16534g	SAKL0C12122g,SAKL0F00792g,SAKL0G06600g,SAKL0G03300g,SAKL0E00132g,SAKL0F00110g	YEL065W,YOL158C,YHL040C,YCL073C,YKR106W,YHL047C	SIT1,ENB1,ARN1,GEX1,GEX2,ARN2	Ferrioxamine B transporter, member of the ARN family of transporters that specifically recognize siderophore-iron chelates | Endosomal ferric enterobactin transporter, expressed under conditions of iron deprivation | ARN family transporter for siderophore-iron chelates | Proton:glutathione antiporter localized to the vacuolar and plasma membranes | Proton:glutathione antiporter localized to the v…	cytoplasm (x1) | vacuole (x4) | nucleus (x2) | membrane (x6) | cytoplasmic membrane-bounded vesicle (x1) | cellular bud (x5) | plasma membrane (x2)	transmembrane transporter activity (x6)	ion transport (x2) | cofactor metabolic process (x3) | cellular ion homeostasis (x1) | amino acid transport (x3) | transmembrane transport (x3)	-	0	1	1	1	0	1	1	1	0	2	-	KLTH0B10208pg	LAME0D11386g	LAFA0B00210g	-	LAFE0B00342g	LADA0G16578g	LANO0D09780g	-	SAKL0A10494pg,SAKL0A10736pg
20	3	4	3	3	6	5	3	3	4	9	9	LAWA0F15082g,LAWA0F00166g,LAWA0G11298g	KLTH0E15796g,KLTH0A01914g,KLTH0G19448g,KLTH0E17138g	LAME0G19350g,LAME0A04016g,LAME0G18734g	LAFA0F01662g,LAFA0G18228g,LAFA0A04742g	LACI0B01068g,LACI0F04016g,LACI0D11342g,LACI0G09846g,LACI0G11606g,LACI0F03994g	LAFE0B11848g,LAFE0D07602g,LAFE0G11716g,LAFE0G13476g,LAFE0H16270g	LADA0D12200g,LADA0A07316g,LADA0F11848g	LANO0B07778g,LANO0B01794g,LANO0B05182g	LAMI0E15544g,LAMI0F13146g,LAMI0E06656g,LAMI0C03972g	SAKL0C08074g,SAKL0C11616g,SAKL0H21010g,SAKL0H10670g,SAKL0C05654g,SAKL0G08008g,SAKL0C06996g,SAKL0C11704g,SAKL0F04312g	YOL075C,YIL013C,YNR070W,YOR328W,YDR011W,YOR153W,YPL058C,YDR406W,YOR011W	Unknown name,PDR11,PDR18,PDR10,SNQ2,PDR5,PDR12,PDR15,AUS1	Putative ABC transporter | ATP-binding cassette (ABC) transporter | Putative transporter of the ATP-binding cassette (ABC) family, implicated in pleiotropic drug resistance | ATP-binding cassette (ABC) transporter, multidrug transporter involved in the pleiotropic drug resistance network | Plasma membrane ATP-binding cassette (ABC) transporter, multidrug transporter involved in multidrug resistan…	mitochondrion (x4) | cytoplasm (x9) | plasma membrane (x4) | membrane (x6)	transmembrane transporter activity (x8) | ATPase activity (x9)	lipid transport (x2) | response to chemical stimulus (x2) | other (x5) | transmembrane transport (x2)	-	2	2	0	0	0	0	0	1	0	1	LAWA0E00386g,LAWA0F15566g	KLTH0H00110pg,KLTH0C11979pg	-	-	-	-	-	LANO0B05160g	-	SAKL0D15356pg
21	4	5	5	5	6	6	5	5	5	6	5	LAWA0E14620g,LAWA0E14598g,LAWA0B05842g,LAWA0B12090g	KLTH0G17732g,KLTH0B09834g,KLTH0B09812g,KLTH0F12474g,KLTH0F19096g	LAME0A06546g,LAME0H00408g,LAME0H00430g,LAME0F07778g,LAME0F15434g	LAFA0A01794g,LAFA0E00430g,LAFA0E00452g,LAFA0D09032g,LAFA0G19746g	LACI0D04104g,LACI0F20120g,LACI0F20098g,LACI0G08834g,LACI0F01288g,LACI0G05754g	LAFE0B08262g,LAFE0E14840g,LAFE0E14862g,LAFE0G10660g,LAFE0G18228g,LAFE0E06084g	LADA0C10792g,LADA0E14774g,LADA0E14752g,LADA0E12794g,LADA0G02058g	LANO0D09472g,LANO0C09472g,LANO0C09494g,LANO0H18976g,LANO0E04940g	LAMI0B02894g,LAMI0F16358g,LAMI0F16336g,LAMI0E01442g,LAMI0G06986g	SAKL0B04180g,SAKL0H00528g,SAKL0H00550g,SAKL0F05456g,SAKL0C13024g,SAKL0H05236g	YLR343W,YMR307W,YOL030W,YOL132W,YMR215W	GAS2,GAS1,GAS5,GAS4,GAS3	1,3-beta-glucanosyltransferase, involved with Gas4p in spore wall assembly | Beta-1,3-glucanosyltransferase, required for cell wall assembly and also has a role in transcriptional silencing | 1,3-beta-glucanosyltransferase, has similarity to Gas1p | 1,3-beta-glucanosyltransferase, involved with Gas2p in spore wall assembly | Low abundance, possibly inactive member of the GAS family of GPI-contain…	cytoplasm (x4) | cytoplasmic membrane-bounded vesicle (x2) | membrane (x1) | mitochondrion (x5) | cell wall (x1) | nucleus (x1) | plasma membrane (x2)	other (x5)	cell wall organization or biogenesis (x1) | sporulation (x1) | carbohydrate metabolic process (x3) | unknown (x2)	-	1	0	0	0	0	0	0	0	0	0	LAWA0H03378g	-	-	-	-	-	-	-	-	-
22	3	5	4	4	5	6	4	5	6	4	7	LAWA0E14532g,LAWA0A02586g,LAWA0A07976g	KLTH0C09240g,KLTH0H16038g,KLTH0B00396g,KLTH0B09724g,KLTH0G12716g	LAME0A00826g,LAME0H00540g,LAME0A05358g,LAME0G07822g	LAFA0A07668g,LAFA0E00540g,LAFA0E04720g,LAFA0A03048g	LACI0F11144g,LACI0F19966g,LACI0E00210g,LACI0H11936g,LACI0F10374g	LAFE0H08482g,LAFE0D00716g,LAFE0D01508g,LAFE0E14708g,LAFE0E00166g,LAFE0D00518g	LADA0F00628g,LADA0E14598g,LADA0F02432g,LADA0C09604g	LANO0G18074g,LANO0C07338g,LANO0C09340g,LANO0D08284g,LANO0H12750g	LAMI0D13234g,LAMI0H16468g,LAMI0F16226g,LAMI0G06084g,LAMI0E03202g,LAMI0C05996g	SAKL0H26026g,SAKL0H00704g,SAKL0H23958g,SAKL0H16016g	YLL048C,YGR281W,YHL035C,YDR135C,YLL015W,YKR104W,YKR103W	YBT1,YOR1,VMR1,YCF1,BPT1,Unknown name,NFT1	Transporter of the ATP-binding cassette (ABC) family | Plasma membrane ATP-binding cassette (ABC) transporter, multidrug transporter mediates export of many different organic anions including oligomycin | Vacuolar membrane protein | Vacuolar glutathione S-conjugate transporter | ABC type transmembrane transporter of MRP/CFTR family, found in vacuolar membrane, involved in the transport of unconju…	cytoplasm (x4) | ribosome (x7) | vacuole (x1) | membrane (x1) | mitochondrion (x1) | plasma membrane (x4)	transmembrane transporter activity (x6) | ATPase activity (x7)	ion transport (x3) | response to chemical stimulus (x2) | other (x3) | transmembrane transport (x1)	-	1	0	0	0	0	0	0	1	0	2	LAWA0H14136g	-	-	-	-	-	-	LANO0F15456g	-	SAKL0H00121pg,SAKL0A10714pg
23	5	5	5	5	5	5	5	5	5	5	6	LAWA0A11738g,LAWA0H13784g,LAWA0A03840g,LAWA0C05358g,LAWA0B10154g	KLTH0H01562g,KLTH0C07964g,KLTH0H15686g,KLTH0F17050g,KLTH0F05610g	LAME0B06854g,LAME0F04984g,LAME0A01112g,LAME0D01970g,LAME0G05072g	LAFA0G23244g,LAFA0F04940g,LAFA0A07206g,LAFA0G05182g,LAFA0D15522g	LACI0H02652g,LACI0E04126g,LACI0F10792g,LACI0E08086g,LACI0H23816g	LAFE0B02784g,LAFE0E03928g,LAFE0D01112g,LAFE0G05358g,LAFE0F02322g	LADA0F14246g,LADA0B07206g,LADA0F00892g,LADA0E05204g,LADA0A02080g	LANO0E01486g,LANO0A03620g,LANO0G17810g,LANO0H23244g,LANO0G05094g	LAMI0E15082g,LAMI0C06040g,LAMI0D12926g,LAMI0G13960g,LAMI0E12794g	SAKL0F11088g,SAKL0D03960g,SAKL0E05148g,SAKL0C06336g,SAKL0G01496g	YDL160C,YDR021W,YDL084W,YKR059W,YJL138C,YOR046C	DHH1,FAL1,SUB2,TIF1,TIF2,DBP5	Cytoplasmic DExD/H-box helicase, stimulates mRNA decapping | Nucleolar protein required for maturation of 18S rRNA, member of the eIF4A subfamily of DEAD-box ATP-dependent RNA helicases | Component of the TREX complex required for nuclear mRNA export | Translation initiation factor eIF4A | Translation initiation factor eIF4A | Cytoplasmic ATP-dependent RNA helicase of the DEAD-box family	nucleolus (x1) | site of polarized growth (x1) | cytoplasm (x5) | ribosome (x1) | endomembrane system (x2) | nucleus (x1) | plasma membrane (x3) | membrane (x1) | cellular bud (x2) | chromosome (x1)	RNA binding (x6) | helicase activity (x2) | ion binding (x6) | ATPase activity (x1) | translation factor activity, nucleic acid binding (x2)	RNA catabolic process (x1) | RNA splicing (x1) | rRNA processing (x1) | mRNA processing (x1) | DNA-dependent transcription, elongation (x1) | nuclear transport (x2) | response to DNA damage stimulus (x2) | translational initiation (x1) | regulation of translation (x1) | DNA repair (x1) | ribosomal small subunit biogenesis (x1) | nucleobase-containing compound transport (x1) | transcription from R…	-	0	0	0	0	0	0	0	0	0	0	-	-	-	-	-	-	-	-	-	-
24	4	5	5	5	5	5	5	5	5	5	7	LAWA0A07954g,LAWA0H03598g,LAWA0G13102g,LAWA0F14334g	KLTH0G12738g,KLTH0G17512g,KLTH0H08316g,KLTH0G06974g,KLTH0E15004g	LAME0G07844g,LAME0C05380g,LAME0A06348g,LAME0D08042g,LAME0F03224g	LAFA0E04742g,LAFA0C06172g,LAFA0A01992g,LAFA0F18712g,LAFA0F16226g	LACI0H11958g,LACI0D03906g,LACI0H15126g,LACI0F12354g,LACI0G14642g	LAFE0H08504g,LAFE0B08064g,LAFE0H11804g,LAFE0G16578g,LAFE0A04566g	LADA0F02454g,LADA0F09120g,LADA0C10572g,LADA0E07778g,LADA0D01860g	LANO0C07316g,LANO0F04390g,LANO0D09274g,LANO0H09824g,LANO0E06436g	LAMI0H16446g,LAMI0B03092g,LAMI0H13058g,LAMI0D03356g,LAMI0E09582g	SAKL0H19668g,SAKL0H16038g,SAKL0B04488g,SAKL0G10978g,SAKL0B07304g	YBL016W,YLR113W,YGR040W,YHR030C,YPR054W,YOL128C,YKL161C	FUS3,HOG1,KSS1,SLT2,SMK1,YGK3,KDX1	Mitogen-activated serine/threonine protein kinase involved in mating | Mitogen-activated protein kinase involved in osmoregulation | Mitogen-activated protein kinase (MAPK) involved in signal transduction pathways that control filamentous growth and pheromone response | Serine/threonine MAP kinase | Middle sporulation-specific mitogen-activated protein kinase (MAPK) required for production of the…	site of polarized growth (x1) | cytoplasm (x2) | unknown (x4) | nucleus (x2) | mitochondrion (x4) | cellular bud (x2)	kinase activity (x7) | transcription factor binding (x5) | signal transducer activity (x1)	response to chemical stimulus (x1) | sporulation (x2) | protein phosphorylation (x2) | response to osmotic stress (x1) | protein targeting (x2) | regulation of transport (x1) | mRNA processing (x1) | conjugation (x1) | nuclear transport (x6) | response to heat (x1) | regulation of cell cycle (x1) | invasive growth in response to glucose limitation (x1) | signaling (x4) | unknown (x1) | cell wall …	-	0	0	0	0	0	0	0	0	0	0	-	-	-	-	-	-	-	-	-	-
25	3	1	1	3	0	0	1	3	2	0	0	LAWA0H12486g,LAWA0C13652g,LAWA0C07954g	KLTH0B06666g	LAME0F17062g	LAFA0F08394g,LAFA0C07074g,LAFA0F10704g	-	-	LADA0E02828g	LANO0H13938g,LANO0G08988g,LANO0H03444g	LAMI0G14972g,LAMI0B03554g	-	-	-	-	-	-	-	-	0	7	4	11	1	0	1	6	6	3	-	KLTH0G00242g,KLTH0H13266g,KLTH0E03190g,KLTH0H01056g,KLTH0D12342g,KLTH0F03410g,KLTH0C00198g	LAME0H06568g,LAME0F13938g,LAME0G06986g,LAME0H06546g	LAFA0G24652g,LAFA0A00166g,LAFA0D12794g,LAFA0F00386g,LAFA0F00518g,LAFA0F00144g,LAFA0G12904g,LAFA0F00320g,LAFA0G00221g,LAFA0G11441g,LAFA0E19317g	LACI0A03719g	-	LADA0H17392g	LANO0D11298g,LANO0C02124g,LANO0B07624g,LANO0F06920g,LANO0F06898g,LANO0B07635g	LAMI0H05776g,LAMI0D04632g,LAMI0B08812g,LAMI0H11276g,LAMI0B03532g,LAMI0H09780g	SAKL0C11022g,SAKL0F14773g,SAKL0A10054g
26	2	6	2	5	8	3	2	4	2	5	4	LAWA0H00276g,LAWA0E14796g	KLTH0B10142g,KLTH0B00132g,KLTH0B00594g,KLTH0C10120g,KLTH0C10142g,KLTH0D16962g	LAME0D09670g,LAME0D09692g	LAFA0D17348g,LAFA0B00166g,LAFA0F02850g,LAFA0F02872g,LAFA0E00100g	LACI0E01904g,LACI0E01882g,LACI0E01860g,LACI0E01992g,LACI0E01970g,LACI0E02014g,LACI0E01926g,LACI0E01948g	LAFE0E00122g,LAFE0E01838g,LAFE0E01816g	LADA0B09494g,LADA0B09472g	LANO0A05776g,LANO0A05820g,LANO0E00276g,LANO0A05798g	LAMI0G17876g,LAMI0B07008g	SAKL0A00726g,SAKL0B12716g,SAKL0C05588g,SAKL0F00198g,SAKL0A08228g	YKR105C,YPR198W,YGR224W,YCL069W	VBA5,SGE1,AZR1,VBA3	Plasma membrane protein of the Major Facilitator Superfamily (MFS) | Plasma membrane multidrug transporter of the major facilitator superfamily, acts as an extrusion permease | Plasma membrane transporter of the major facilitator superfamily, involved in resistance to azole drugs such as ketoconazole and fluconazole | Permease of basic amino acids in the vacuolar membrane	vacuole (x1) | cytoplasm (x4) | plasma membrane (x3) | membrane (x1)	unknown (x1) | transmembrane transporter activity (x1) | other (x2)	ion transport (x2) | response to chemical stimulus (x2) | transmembrane transport (x2) | amino acid transport (x1)	-	0	0	1	2	0	0	0	1	0	1	-	-	LAME0H00144g	LAFA0F00122g,LAFA0C00100g	-	-	-	LANO0F01178g	-	SAKL0A10692pg
27	3	3	4	3	8	7	4	3	5	3	2	LAWA0C04214g,LAWA0E00166g,LAWA0B01662g	KLTH0F04422g,KLTH0H05500g,KLTH0E01804g	LAME0G04016g,LAME0C00188g,LAME0C08240g,LAME0A01706g	LAFA0F00716g,LAFA0G04104g,LAFA0A06634g	LACI0A00210g,LACI0E09186g,LACI0E09164g,LACI0E09142g,LACI0E07426g,LACI0D09494g,LACI0G20076g,LACI0F02718g	LAFE0G04192g,LAFE0G04214g,LAFE0G06018g,LAFE0B00232g,LAFE0F08570g,LAFE0C05930g,LAFE0G16864g	LADA0E00364g,LADA0E04126g,LADA0A02586g,LADA0G00804g	LANO0G04016g,LANO0F01530g,LANO0B03972g	LAMI0A00386g,LAMI0G08262g,LAMI0G14532g,LAMI0F07822g,LAMI0B04500g	SAKL0C04950g,SAKL0C00308g,SAKL0F15070g	YJL172W,YOL153C	CPS1,Unknown name	Vacuolar carboxypeptidase yscS | Hypothetical protein	vacuole (x1) | cytoplasm (x1)	peptidase activity (x1)	proteolysis involved in cellular protein catabolic process (x1)	-	0	0	2	0	0	0	0	0	0	1	-	-	LAME0H21110g,LAME0B08152g	-	-	-	-	-	-	SAKL0A05852pg
28	2	5	2	3	6	8	3	4	3	6	5	LAWA0D06458g,LAWA0C13300g	KLTH0F15510g,KLTH0B01188g,KLTH0D08272g,KLTH0E09702g,KLTH0D00418g	LAME0C00980g,LAME0H06634g	LAFA0D06194g,LAFA0B00672g,LAFA0E09362g	LACI0A00826g,LACI0H22320g,LACI0F10616g,LACI0C04016g,LACI0A01288g,LACI0C09978g	LAFE0B12618g,LAFE0F03862g,LAFE0D01288g,LAFE0F12464g,LAFE0A07822g,LAFE0D00210g,LAFE0C00276g,LAFE0B12706g	LADA0G08614g,LADA0D07360g,LADA0G00628g	LANO0H21814g,LANO0E11650g,LANO0H12772g,LANO0E16358g	LAMI0A08394g,LAMI0B02520g,LAMI0D04148g	SAKL0D00220g,SAKL0G03036g,SAKL0E04972g,SAKL0F04334g,SAKL0G10164g,SAKL0G14894g	YDR380W,YGR087C,YLR134W,YLR044C,YDL080C	ARO10,PDC6,PDC5,PDC1,THI3	Phenylpyruvate decarboxylase, catalyzes decarboxylation of phenylpyruvate to phenylacetaldehyde, which is the first specific step in the Ehrlich pathway | Minor isoform of pyruvate decarboxylase, decarboxylates pyruvate to acetaldehyde, involved in amino acid catabolism | Minor isoform of pyruvate decarboxylase, key enzyme in alcoholic fermentation, decarboxylates pyruvate to acetaldehyde, regula…	cytoplasm (x4) | nucleus (x3)	transcription factor binding (x5) | lyase activity (x1)	cellular amino acid metabolic process (x2) | vitamin metabolic process (x4) | carbohydrate metabolic process (x2) | generation of precursor metabolites and energy (x1) | transcription from RNA polymerase II promoter (x1)	-	0	0	1	0	0	0	0	0	0	0	-	-	LAME0F10506g	-	-	-	-	-	-	-
29	4	4	4	4	4	4	4	4	4	5	6	LAWA0D09758g,LAWA0F07272g,LAWA0B05578g,LAWA0D02476g	KLTH0G04246g,KLTH0E06314g,KLTH0H05148g,KLTH0D15950g	LAME0H12002g,LAME0C08504g,LAME0H16468g,LAME0E08482g	LAFA0E14708g,LAFA0C02894g,LAFA0D12024g,LAFA0G12794g	LACI0C06040g,LACI0F07074g,LACI0G20362g,LACI0G02542g	LAFE0F14510g,LAFE0D04720g,LAFE0C05622g,LAFE0A02432g	LADA0G08680g,LADA0H04060g,LADA0G03422g,LADA0H14290g	LANO0H12574g,LANO0F08790g,LANO0F01244g,LANO0G12860g	LAMI0D12002g,LAMI0D07690g,LAMI0D09780g,LAMI0H01574g	SAKL0G05390g,SAKL0H25278g,SAKL0A05522g,SAKL0G17094g,SAKL0C07491g	YML016C,YDR436W,YER133W,YPL179W,YML057W,YLR433C	PPZ1,PPZ2,GLC7,PPQ1,CMP2,CNA1	Serine/threonine protein phosphatase Z, isoform of Ppz2p | Serine/threonine protein phosphatase Z, isoform of Ppz1p | Type 1 serine/threonine protein phosphatase catalytic subunit | Putative protein serine/threonine phosphatase | Calcineurin A | Calcineurin A	nucleolus (x1) | site of polarized growth (x1) | cytoplasm (x1) | unknown (x5) | microtubule organizing center (x1) | nucleus (x1) | plasma membrane (x1) | membrane (x1) | cytoskeleton (x2) | cellular bud (x1) | chromosome (x1)	phosphatase activity (x6)	histone modification (x1) | mitotic cell cycle (x1) | DNA replication (x1) | carbohydrate metabolic process (x1) | chromosome segregation (x1) | response to heat (x1) | transcription from RNA polymerase II promoter (x5) | organelle fission (x1) | regulation of organelle organization (x1) | rRNA processing (x2) | cellular ion homeostasis (x1) | conjugation (x1) | regulation of cell cycle (x1) | ce…	-	0	0	0	0	0	0	0	0	0	0	-	-	-	-	-	-	-	-	-	-
30	4	4	4	4	4	4	4	4	4	4	6	LAWA0C12882g,LAWA0E02190g,LAWA0G04104g,LAWA0D01156g	KLTH0B01650g,KLTH0D02266g,KLTH0F10252g,KLTH0D17336g	LAME0C01244g,LAME0B02058g,LAME0E05314g,LAME0E13498g	LAFA0B00958g,LAFA0C08856g,LAFA0G09648g,LAFA0F06282g	LACI0A01860g,LACI0G17128g,LACI0F14334g,LACI0G00870g	LAFE0A07382g,LAFE0D11056g,LAFE0E09142g,LAFE0A00672g	LADA0F09846g,LADA0F07272g,LADA0C02608g,LADA0A08350g	LANO0E15940g,LANO0C02278g,LANO0G09648g,LANO0B00694g	LAMI0A07932g,LAMI0F06546g,LAMI0E02080g,LAMI0C03488g	SAKL0G14410g,SAKL0B10076g,SAKL0B12188g,SAKL0E05720g	YGR199W,YAL023C,YOR321W,YDL095W,YJR143C,YDL093W	PMT6,PMT2,PMT3,PMT1,PMT4,PMT5	Protein O-mannosyltransferase, transfers mannose from dolichyl phosphate-D-mannose to protein serine/threonine residues of secretory proteins | Protein O-mannosyltransferase of the ER membrane | Protein O-mannosyltransferase | Protein O-mannosyltransferase of the ER membrane | Protein O-mannosyltransferase, transfers mannose residues from dolichyl phosphate-D-mannose to protein serine/threonine r…	cytoplasm (x4) | membrane (x4) | endoplasmic reticulum (x4) | endomembrane system (x6)	transferase activity, transferring glycosyl groups (x6)	protein glycosylation (x6) | response to chemical stimulus (x6) | carbohydrate metabolic process (x2) | signaling (x3) | proteolysis involved in cellular protein catabolic process (x3)	-	0	0	0	0	0	0	0	0	0	0	-	-	-	-	-	-	-	-	-	-
31	0	4	3	3	3	3	4	2	3	5	7	-	KLTH0E17006g,KLTH0B00308g,KLTH0G19470g,KLTH0H05324g	LAME0D11342g,LAME0A00232g,LAME0C08394g	LAFA0D17568g,LAFA0E00188g,LAFA0F00782g	LACI0F20362g,LACI0C09934g,LACI0E00254g	LAFE0G01090g,LAFE0A00254g,LAFE0G01134g	LADA0G16688g,LADA0G16754g,LADA0H04346g,LADA0F00320g	LANO0F01354g,LANO0G18272g	LAMI0B00122g,LAMI0F07580g,LAMI0F07646g	SAKL0C02112g,SAKL0A05654g,SAKL0A05698g,SAKL0A00154g,SAKL0C00176g	YBR299W,YGR292W,YGR287C,YOL157C,YJL221C,YIL172C,YJL216C	MAL32,MAL12,IMA1,IMA2,IMA4,IMA3,IMA5	Maltase (alpha-D-glucosidase), inducible protein involved in maltose catabolism | Maltase (alpha-D-glucosidase), inducible protein involved in maltose catabolism | Major isomaltase (alpha-1,6-glucosidase/alpha-methylglucosidase) | Isomaltase (alpha-1,6-glucosidase/alpha-methylglucosidase) | Alpha-glucosidase | Alpha-glucosidase | Alpha-glucosidase	cytoplasm (x3) | ribosome (x2) | unknown (x2) | membrane (x1) | mitochondrion (x2) | plasma membrane (x1)	hydrolase activity, acting on glycosyl bonds (x7)	carbohydrate metabolic process (x7) | oligosaccharide metabolic process (x7)	-	0	0	0	2	4	0	0	1	0	1	-	-	-	LAFA0C03048g,LAFA0C00166pg	LACI0B00122g,LACI0G00100g,LACI0F00100g,LACI0E00100g	-	-	LANO0C09714g	-	SAKL0E05203pg
32	4	4	4	4	4	4	4	4	4	4	5	LAWA0A11210g,LAWA0D01552g,LAWA0F07932g,LAWA0D08086g	KLTH0H02068g,KLTH0G11880g,KLTH0G05918g,KLTH0D16918g	LAME0B06304g,LAME0A04280g,LAME0G11298g,LAME0H10396g	LAFA0G22694g,LAFA0E13124g,LAFA0A05006g,LAFA0F15874g	LACI0H03246g,LACI0C04412g,LACI0G01640g,LACI0H11254g	LAFE0B03356g,LAFE0A01442g,LAFE0F12860g,LAFE0H07756g	LADA0F13718g,LADA0A07580g,LADA0G06282g,LADA0E06656g	LANO0E02014g,LANO0H10946g,LANO0B01486g,LANO0H05050g	LAMI0E11650g,LAMI0D04522g,LAMI0G09296g,LAMI0H17150g	SAKL0F10450g,SAKL0G17974g,SAKL0G09746g,SAKL0H15268g	YLR216C,YDR304C,YHR057C,YML078W,YDR155C	CPR6,CPR5,CPR2,CPR3,CPR1	Peptidyl-prolyl cis-trans isomerase (cyclophilin) | Peptidyl-prolyl cis-trans isomerase (cyclophilin) of the ER | Peptidyl-prolyl cis-trans isomerase (cyclophilin) | Mitochondrial peptidyl-prolyl cis-trans isomerase (cyclophilin), catalyzes the cis-trans isomerization of peptide bonds N-terminal to proline residues | Cytoplasmic peptidyl-prolyl cis-trans isomerase (cyclophilin)	mitochondrial envelope (x1) | cytoplasm (x1) | unknown (x4) | endoplasmic reticulum (x1) | nucleus (x1) | mitochondrion (x2) | chromosome (x1)	isomerase activity (x5) | unfolded protein binding (x1)	histone modification (x2) | sporulation (x1) | chromatin organization (x1) | protein folding (x1) | regulation of cell cycle (x2) | meiotic cell cycle (x1) | unknown (x1)	-	0	0	0	0	0	0	0	0	0	0	-	-	-	-	-	-	-	-	-	-
33	4	4	4	4	4	4	4	4	4	4	5	LAWA0A03312g,LAWA0H06216g,LAWA0A10924g,LAWA0G16754g	KLTH0C08470g,KLTH0H07458g,KLTH0H02354g,KLTH0A06798g	LAME0F05490g,LAME0B06018g,LAME0C06194g,LAME0H15346g	LAFA0F04434g,LAFA0G22408g,LAFA0C05358g,LAFA0F13476g	LACI0E03620g,LACI0H03532g,LACI0H14312g,LACI0G24300g	LAFE0E03422g,LAFE0H10902g,LAFE0B03642g,LAFE0C01310g	LADA0B07712g,LADA0F13432g,LADA0A04742g,LADA0F14510g	LANO0A04126g,LANO0F03576g,LANO0E02300g,LANO0A01464g	LAMI0H19790g,LAMI0E11364g,LAMI0H12222g,LAMI0G11562g	SAKL0C08382g,SAKL0F10164g,SAKL0H18744g,SAKL0A01232g	YDL047W,YDR075W,YDL134C,YDL188C,YNR032W	SIT4,PPH3,PPH21,PPH22,PPG1	Type 2A-related serine-threonine phosphatase that functions in the G1/S transition of the mitotic cycle | Catalytic subunit of protein phosphatase PP4 complex | Catalytic subunit of protein phosphatase 2A (PP2A) | Catalytic subunit of protein phosphatase 2A (PP2A) | Putative serine/threonine protein phosphatase of the type 2A-like phosphatase family, required for glycogen accumulation	cytoplasm (x2) | nucleus (x4) | chromosome (x5)	phosphatase activity (x5)	response to chemical stimulus (x1) | mitotic cell cycle (x2) | carbohydrate metabolic process (x1) | cell budding (x1) | regulation of organelle organization (x2) | RNA modification (x1) | tRNA processing (x3) | protein dephosphorylation (x1) | cell wall organization or biogenesis (x1) | signaling (x3) | regulation of cell cycle (x2) | generation of precursor metabolites and energy (x4) | respons…	-	0	0	0	0	0	0	0	0	0	0	-	-	-	-	-	-	-	-	-	-
34	3	4	4	4	4	4	4	4	4	4	5	LAWA0G14180g,LAWA0E02080g,LAWA0G03796g	KLTH0A04180g,KLTH0D02156g,KLTH0G14388g,KLTH0F09922g	LAME0A01882g,LAME0B01882g,LAME0G09450g,LAME0E05028g	LAFA0A06458g,LAFA0C09032g,LAFA0E06326g,LAFA0G09362g	LACI0D01178g,LACI0G17238g,LACI0H13586g,LACI0F14642g	LAFE0B05182g,LAFE0D11166g,LAFE0H10154g,LAFE0E09428g	LADA0A05292g,LADA0F07382g,LADA0C02322g,LADA0F04016g	LANO0B03796g,LANO0C02168g,LANO0C05688g,LANO0G09362g	LAMI0G12156g,LAMI0F06436g,LAMI0H14884g,LAMI0E02366g	SAKL0F08514g,SAKL0B10186g,SAKL0H17908g,SAKL0E06072g	YIL048W,YAL026C,YER166W,YDR093W,YMR162C	NEO1,DRS2,DNF1,DNF2,DNF3	Putative aminophospholipid translocase (flippase) involved in endocytosis and vacuolar biogenesis | Aminophospholipid translocase (flippase) that maintains membrane lipid asymmetry in post-Golgi secretory vesicles | Aminophospholipid translocase (flippase) that localizes primarily to the plasma membrane | Aminophospholipid translocase (flippase) that localizes primarily to the plasma membrane | A…	Golgi apparatus (x2) | cytoplasm (x3) | endomembrane system (x2) | cytoplasmic membrane-bounded vesicle (x1) | membrane (x5) | mitochondrion (x1) | plasma membrane (x2)	transmembrane transporter activity (x5) | ATPase activity (x2)	organelle assembly (x2) | vacuole organization (x4) | ribosome assembly (x4) | endocytosis (x4) | ion transport (x1) | Golgi vesicle transport (x1) | lipid transport (x1) | ribosomal small subunit biogenesis (x1)	-	1	0	0	0	0	0	0	0	0	0	LAWA0A06238g	-	-	-	-	-	-	-	-	-
35	4	4	4	4	3	4	4	4	3	4	5	LAWA0B05072g,LAWA0B00914g,LAWA0A08174g,LAWA0G02696g	KLTH0E01078g,KLTH0E05852g,KLTH0G12540g,KLTH0F08734g	LAME0H16930g,LAME0F03950g,LAME0G07646g,LAME0E03906g	LAFA0D12486g,LAFA0E18910g,LAFA0E04544g,LAFA0G08240g	LACI0H25136g,LACI0H11760g,LACI0H09956g	LAFE0H08284g,LAFE0D05182g,LAFE0F00870g,LAFE0H06480g	LADA0G02982g,LADA0D01112g,LADA0C01178g,LADA0F02256g	LANO0E05688g,LANO0F09252g,LANO0G08218g,LANO0C07514g	LAMI0H16644g,LAMI0H00892g,LAMI0H18448g	SAKL0E14894g,SAKL0H25784g,SAKL0H15818g,SAKL0H13926g	YLL039C,YKR094C,YIL148W,YLR167W,YDR139C	UBI4,RPL40B,RPL40A,RPS31,RUB1	Ubiquitin | Ubiquitin-ribosomal 60S subunit protein L40B fusion protein | Ubiquitin-ribosomal 60S subunit protein L40A fusion protein | Fusion protein cleaved to yield ribosomal protein S31 and ubiquitin | Ubiquitin-like protein with similarity to mammalian NEDD8	mitochondrion (x5) | cytoplasm (x1) | ribosome (x1) | nucleus (x3)	other (x2) | structural molecule activity (x3) | structural constituent of ribosome (x3)	organelle assembly (x3) | sporulation (x1) | ribosome assembly (x4) | protein modification by small protein conjugation or removal (x1) | rRNA processing (x1) | cytoplasmic translation (x1) | ribosomal small subunit biogenesis (x1)	-	0	0	0	0	1	0	0	0	1	0	-	-	-	-	LACI0F06612g	-	-	-	LAMI0F04918g	-
36	3	4	4	4	4	4	4	4	4	4	4	LAWA0F10682g,LAWA0E04390g,LAWA0G03400g	KLTH0E11220g,KLTH0E11924g,KLTH0D04356g,KLTH0F09504g	LAME0H09098g,LAME0H08416g,LAME0A04698g,LAME0E04632g	LAFA0E11804g,LAFA0E11144g,LAFA0A03686g,LAFA0G08966g	LACI0G10748g,LACI0G11518g,LACI0B02784g,LACI0F15060g	LAFE0G12618g,LAFE0G13388g,LAFE0C10022g,LAFE0E09846g	LADA0D05952g,LADA0D05270g,LADA0G09494g,LADA0C01904g	LANO0E10220g,LANO0E09516g,LANO0D07602g,LANO0G08944g	LAMI0H07228g,LAMI0H02278g,LAMI0G05424g,LAMI0E02762g	SAKL0H11638g,SAKL0H10758g,SAKL0E06534g,SAKL0E04092g	YPL031C,YBR160W,YKL139W,YDL108W	PHO85,CDC28,CTK1,KIN28	Cyclin-dependent kinase, with ten cyclin partners | Catalytic subunit of the main cell cycle cyclin-dependent kinase (CDK) | Catalytic (alpha) subunit of C-terminal domain kinase I (CTDK-I) | Serine/threonine protein kinase, subunit of the transcription factor TFIIH	nucleolus (x1) | site of polarized growth (x1) | cytoplasm (x1) | ribosome (x1) | endoplasmic reticulum (x1) | microtubule organizing center (x1) | nucleus (x4) | cytoskeleton (x1) | cellular bud (x1)	enzyme binding (x1) | protein binding transcription factor activity (x1) | histone binding (x4) | kinase activity (x1)	mitotic cell cycle (x1) | DNA replication (x1) | carbohydrate metabolic process (x1) | chromosome segregation (x1) | lipid metabolic process (x1) | DNA-dependent transcription, elongation (x1) | response to starvation (x1) | transcription from RNA polymerase II promoter (x1) | regulation of organelle organization (x1) | mRNA processing (x1) | regulation of cell cycle (x1) | cell wall organization…	-	1	0	0	0	0	0	0	0	0	0	LAWA0F11298g	-	-	-	-	-	-	-	-	-
37	3	4	4	4	4	4	4	4	4	4	4	LAWA0G01024g,LAWA0A11078g,LAWA0A11056g	KLTH0G08074g,KLTH0E13838g,KLTH0H02200g,KLTH0H02222g	LAME0D06986g,LAME0D09406g,LAME0B06172g,LAME0B06150g	LAFA0F19768g,LAFA0F17326g,LAFA0G22562g,LAFA0G22540g	LACI0F18426g,LACI0G13542g,LACI0H03378g,LACI0H03400g	LAFE0E13190g,LAFE0G15412g,LAFE0B03488g,LAFE0B03510g	LADA0E08812g,LADA0D03334g,LADA0F13586g,LADA0F13564g	LANO0H08746g,LANO0E07558g,LANO0E02146g,LANO0E02168g	LAMI0F09516g,LAMI0E08460g,LAMI0E11518g,LAMI0E11496g	SAKL0E10054g,SAKL0H08624g,SAKL0F10296g,SAKL0F10318g	YOR094W,YBR164C,YDL192W,YDL137W	ARF3,ARL1,ARF1,ARF2	Glucose-repressible ADP-ribosylation factor, GTPase of the Ras superfamily involved in development of polarity | Soluble GTPase with a role in regulation of membrane traffic | ADP-ribosylation factor | ADP-ribosylation factor	cytoplasm (x3) | cellular bud (x1) | Golgi apparatus (x3) | site of polarized growth (x1)	RNA binding (x4) | GTPase activity (x1) | mRNA binding (x1)	endocytosis (x3) | protein targeting (x1) | response to starvation (x1) | Golgi vesicle transport (x1) | lipid metabolic process (x1) | cytoskeleton organization (x1) | cytokinesis (x2)	-	0	0	0	0	0	0	0	0	0	1	-	-	-	-	-	-	-	-	-	SAKL0C09152pg
38	4	6	0	0	2	3	0	5	0	3	16	LAWA0E05050g,LAWA0E02916g,LAWA0F02212g,LAWA0E12134g	KLTH0D00374g,KLTH0G19580g,KLTH0B06710g,KLTH0A00264g,KLTH0B06688g,KLTH0B06677g	-	-	LACI0C02652g,LACI0E06436g	LAFE0H12860g,LAFE0F11166g,LAFE0F11144g	-	LANO0F05160g,LANO0F02850g,LANO0H06810g,LANO0C06458g,LANO0B06942g	-	SAKL0D15312g,SAKL0D01254g,SAKL0D15290g	YHL048W,YKL219W,YNR075W,YNL336W,YJR161C,YML132W,YBR302C,YGR295C,YGL263W,YFL062W,YDL248W,YHL042W,YIR043C,YHL043W,YIR044C,YCR102W-A	COS8,COS9,COS10,COS1,COS5,COS3,COS2,COS6,COS12,COS4,COS7,Unknown name,Unknown name,ECM34,Unknown name,Unknown name	Nuclear membrane protein, member of the DUP380 subfamily of conserved, often subtelomerically-encoded proteins | Protein of unknown function, member of the DUP380 subfamily of conserved, often subtelomerically-encoded proteins | Protein of unknown function, member of the DUP380 subfamily of conserved, often subtelomerically-encoded proteins | Protein of unknown function, member of the DUP380 subf…	cytoplasm (x3) | unknown (x8) | endoplasmic reticulum (x2) | endomembrane system (x1) | vacuole (x11) | nucleus (x1) | membrane (x3) | mitochondrion (x1) | plasma membrane (x6)	unknown (x13) | other (x1)	endocytosis (x12) | cellular ion homeostasis (x1) | unknown (x1)	YCR102W-A	0	1	0	0	0	0	0	2	0	1	-	KLTH0D00330pg	-	-	-	-	-	LANO0G15390g,LANO0F03708g	-	SAKL0F16390pg
39	3	4	3	2	5	4	5	3	3	6	2	LAWA0F15522g,LAWA0B03840g,LAWA0G11958g	KLTH0D00396g,KLTH0A01166g,KLTH0E04400g,KLTH0E13508g	LAME0A00320g,LAME0F19614g,LAME0D09054g	LAFA0F17678g,LAFA0C00958g	LACI0G13168g,LACI0D00232g,LACI0F05182g,LACI0E02036g,LACI0G13190g	LAFE0H17018g,LAFE0H16996g,LAFE0G15060g,LAFE0D06612g	LADA0E00276g,LADA0H04192g,LADA0F10924g,LADA0D03664g,LADA0C12288g	LANO0C01772g,LANO0D11144g,LANO0E07888g	LAMI0C04962g,LAMI0E04742g,LAMI0C09516g	SAKL0B12738g,SAKL0C12540g,SAKL0F07700g,SAKL0H09042g,SAKL0F00330g,SAKL0B05676g	YOL119C,YOR306C	MCH4,MCH5	Protein with similarity to mammalian monocarboxylate permeases, which are involved in transport of monocarboxylic acids across the plasma membrane | Plasma membrane riboflavin transporter	vacuole (x1) | cytoplasm (x2) | plasma membrane (x1) | membrane (x1)	other (x2)	ion transport (x1) | other (x1)	-	0	0	0	0	0	0	1	1	0	0	-	-	-	-	-	-	LADA0A03466g	LANO0H00826g	-	-
40	3	3	4	4	5	4	4	4	4	4	2	LAWA0D07954g,LAWA0A04192g,LAWA0G13146g	KLTH0C07524g,KLTH0E02926g,KLTH0G06930g	LAME0H10264g,LAME0H13608g,LAME0G18536g,LAME0D08086g	LAFA0E12992g,LAFA0F05270g,LAFA0G18052g,LAFA0F18624g	LACI0C04258g,LACI0C09802g,LACI0E04456g,LACI0F12398g,LACI0F03818g	LAFE0F12706g,LAFE0E04280g,LAFE0A04522g,LAFE0D07778g	LADA0E06788g,LADA0B06920g,LADA0E07734g,LADA0F12024g	LANO0H10814g,LANO0A03268g,LANO0H09868g,LANO0B04984g	LAMI0D04390g,LAMI0C01068g,LAMI0D03400g,LAMI0C05688g	SAKL0G09900g,SAKL0D03630g,SAKL0G10934g,SAKL0G07832g	YHR032W,YDR338C	ERC1,Unknown name	Member of the multi-drug and toxin extrusion (MATE) family of the multidrug/oligosaccharidyl-lipid/polysaccharide (MOP) exporter superfamily | Putative protein of unknown function, member of the multi-drug and toxin extrusion (MATE) family of the multidrug/oligosaccharidyl-lipid/polysaccharide (MOP) exporter superfamily	membrane (x2)	transmembrane transporter activity (x2)	nucleobase-containing small molecule metabolic process (x1) | cellular amino acid metabolic process (x1) | cofactor metabolic process (x1) | transmembrane transport (x2)	-	1	0	0	0	0	0	0	0	0	0	LAWA0B02696g	-	-	-	-	-	-	-	-	-
41	3	4	3	3	5	4	2	4	3	5	4	LAWA0A04918g,LAWA0E05622g,LAWA0B04918g	KLTH0E05588g,KLTH0G15686g,KLTH0A00418g,KLTH0D05588g	LAME0H17260g,LAME0G10748g,LAME0G16512g	LAFA0D12816g,LAFA0E15214g,LAFA0F09230g	LACI0A00782g,LACI0F06392g,LACI0B04302g,LACI0G15456g,LACI0D10462g	LAFE0D05468g,LAFE0C08592g,LAFE0D09340g,LAFE0F07580g	LADA0F05380g,LADA0G10704g	LANO0H25268g,LANO0F09560g,LANO0C04346g,LANO0D06304g	LAMI0H05666g,LAMI0C06766g,LAMI0G04192g	SAKL0C10164g,SAKL0F06270g,SAKL0B08184g,SAKL0E02838g,SAKL0H00374g	YMR303C,YOL086C,YMR083W,YBR145W	ADH2,ADH1,ADH3,ADH5	Glucose-repressible alcohol dehydrogenase II, catalyzes the conversion of ethanol to acetaldehyde | Alcohol dehydrogenase | Mitochondrial alcohol dehydrogenase isozyme III | Alcohol dehydrogenase isoenzyme V	mitochondrion (x4) | cytoplasm (x1) | nucleus (x1) | plasma membrane (x1) | membrane (x1)	oxidoreductase activity (x4)	cellular amino acid metabolic process (x2) | generation of precursor metabolites and energy (x4) | nucleobase-containing small molecule metabolic process (x4) | carbohydrate metabolic process (x3) | cofactor metabolic process (x4)	-	0	1	0	0	0	0	0	0	0	0	-	KLTH0E00110g	-	-	-	-	-	-	-	-
42	4	3	2	4	5	4	3	2	5	2	1	LAWA0C00276g,LAWA0B12882g,LAWA0E07360g,LAWA0H00672g	KLTH0B00550g,KLTH0F19844g,KLTH0D07414g	LAME0C09406g,LAME0G14840g	LAFA0D17392g,LAFA0F12178g,LAFA0F00606g,LAFA0F07558g	LACI0D00276g,LACI0G25334g,LACI0H18162g,LACI0G10066g,LACI0F04236g	LAFE0C00298g,LAFE0H14928g,LAFE0G11936g,LAFE0E05072g	LADA0D13498g,LADA0A04456g,LADA0G12398g	LANO0F00320g,LANO0D04632g	LAMI0G17678g,LAMI0E00100g,LAMI0E16446g,LAMI0C00298g,LAMI0F10220g	SAKL0A10010g,SAKL0D00132g	YHL016C	DUR3	Plasma membrane transporter for both urea and polyamines, expression is highly sensitive to nitrogen catabolite repression and induced by allophanate, the last intermediate of the allantoin degradative pathway	plasma membrane (x1) | membrane (x1)	transmembrane transporter activity (x1)	ion transport (x1)	-	0	0	0	0	1	1	3	0	0	0	-	-	-	-	LACI0F00408g	LAFE0A08306g	LADA0C13080g,LADA0F00122g,LADA0D00144g	-	-	-
43	1	2	3	3	5	4	3	4	3	5	3	LAWA0G02146g	KLTH0H16258g,KLTH0F08162g	LAME0G07250g,LAME0A00188g,LAME0E03334g	LAFA0G07668g,LAFA0E04148g,LAFA0E00232g	LACI0F11342g,LACI0H16754g,LACI0C09824g,LACI0H09384g,LACI0D10198g	LAFE0H17810g,LAFE0F07844g,LAFE0H05908g,LAFE0H13520g	LADA0B00232g,LADA0H12552g,LADA0C00606g	LANO0B00210g,LANO0F06084g,LANO0G07646g,LANO0G18426g	LAMI0H11628g,LAMI0H11584g,LAMI0H19042g	SAKL0B12584g,SAKL0H13354g,SAKL0F07194g,SAKL0D06358g,SAKL0D06446g	YOR071C,YOR192C,YLR237W	NRT1,THI72,THI7	High-affinity nicotinamide riboside transporter | Transporter of thiamine or related compound | Plasma membrane transporter responsible for the uptake of thiamine, member of the major facilitator superfamily of transporters	plasma membrane (x3) | membrane (x2)	other (x1) | transmembrane transporter activity (x2)	response to chemical stimulus (x1) | nucleobase-containing compound transport (x3)	-	1	0	0	0	0	0	0	1	0	0	LAWA0H14400g	-	-	-	-	-	-	LANO0F17744g	-	-
44	1	6	4	3	2	3	3	7	4	2	1	LAWA0A01772g	KLTH0D00242g,KLTH0B10230g,KLTH0B10252g,KLTH0B10274g,KLTH0C00264g,KLTH0B10296g	LAME0C09648g,LAME0C02212g,LAME0C01552g,LAME0C01530g	LAFA0A02476g,LAFA0B05116g,LAFA0E21000g	LACI0H18888g,LACI0H18866g	LAFE0G09098g,LAFE0A02322g,LAFE0B07822g	LADA0A03246g,LADA0B04456g,LADA0C02784g	LANO0C00276g,LANO0D00364g,LANO0A00100g,LANO0D00408g,LANO0D00386g,LANO0B00254g,LANO0G18470g	LAMI0H04786g,LAMI0H11298g,LAMI0G04654g,LAMI0C11100g	SAKL0H20636g,SAKL0H20614g	YHL044W	Unknown name	Putative integral membrane protein, member of DUP240 gene family	plasma membrane (x1) | membrane (x1)	unknown (x1)	unknown (x1)	-	0	0	1	0	0	0	0	1	0	0	-	-	LAME0C01574g	-	-	-	-	LANO0F17700g	-	-
45	0	6	1	1	1	1	1	1	1	6	8	-	KLTH0H08294g,KLTH0G12056g,KLTH0G11990g,KLTH0G11968g,KLTH0G12034g,KLTH0G12078g	LAME0C05402g	LAFA0C06150g	LACI0H15104g	LAFE0H11782g	LADA0F09142g	LANO0F04368g	LAMI0H13036g	SAKL0H19646g,SAKL0F16434g,SAKL0E00242g,SAKL0C04048g,SAKL0D15400g,SAKL0C13882g	YBL017C,YJL222W,YIL173W,YNR065C,YCR100C,YNR066C,YCR099C,YCR101C	PEP1,VTH2,VTH1,Unknown name,Unknown name,Unknown name,Unknown name,Unknown name	Type I transmembrane sorting receptor for multiple vacuolar hydrolases | Putative membrane glycoprotein with strong similarity to Vth1p and Pep1p/Vps10p, may be involved in vacuolar protein sorting | Putative membrane glycoprotein with strong similarity to Vth2p and Pep1p/Vps10p, may be involved in vacuolar protein sorting | Protein of unknown function | Putative protein of unknown function | Put…	cytoplasm (x1) | Golgi apparatus (x2) | membrane (x8)	unknown (x5) | other (x3)	protein targeting (x2) | Golgi vesicle transport (x5) | unknown (x2)	-	1	1	0	0	0	4	0	0	0	4	LAWA0H06986g	KLTH0G12012pg	-	-	-	LAFE0C00210g,LAFE0E00210g,LAFE0E15148g,LAFE0D13036g	-	-	-	SAKL0F00165pg,SAKL0B12782pg,SAKL0C13948pg,SAKL0G00242pg
46	2	2	3	3	3	3	4	3	3	3	5	LAWA0D08284g,LAWA0E05600g	KLTH0G05698g,KLTH0F01672g	LAME0H10572g,LAME0G16534g,LAME0G01486g	LAFA0E13300g,LAFA0F09252g,LAFA0G01508g	LACI0C04588g,LACI0D10484g,LACI0E11760g	LAFE0F13036g,LAFE0F07558g,LAFE0G01596g	LADA0G07184g,LADA0G10682g,LADA0H01530g,LADA0C07338g	LANO0H11166g,LANO0D06326g,LANO0G01486g	LAMI0G04214g,LAMI0H02476g,LAMI0F01486g	SAKL0G06952g,SAKL0E02860g,SAKL0C01716g	YDR477W,YDR507C,YKL101W,YCL024W,YPL141C	SNF1,GIN4,HSL1,KCC4,FRK1	AMP-activated serine/threonine protein kinase | Protein kinase involved in bud growth and assembly of the septin ring | Nim1p-related protein kinase that regulates the morphogenesis and septin checkpoints | Protein kinase of the bud neck involved in the septin checkpoint | Protein kinase of unknown cellular role	site of polarized growth (x2) | cytoplasm (x3) | cell cortex (x4) | endomembrane system (x2) | vacuole (x1) | nucleus (x1) | membrane (x1) | mitochondrion (x1) | cytoskeleton (x1) | cellular bud (x3) | plasma membrane (x1)	kinase activity (x1) | lipid binding (x5) | ion binding (x1)	mitotic cell cycle (x1) | cell budding (x2) | protein phosphorylation (x1) | response to starvation (x2) | carbohydrate metabolic process (x1) | regulation of cell cycle (x3) | invasive growth in response to glucose limitation (x2) | protein complex biogenesis (x5) | regulation of translation (x1) | cytoskeleton organization (x3) | cytokinesis (x1) | pseudohyphal growth (x1) | signaling (x1)	-	1	1	0	0	0	0	0	0	0	0	LAWA0C01618g	KLTH0D05566pg	-	-	-	-	-	-	-	-
47	0	0	0	0	0	0	0	0	0	0	34	-	-	-	-	-	-	-	-	-	-	YEL075C,YIL177C,YJL225C,YLR462W,YER189W,YBL111C,YML133C,YNL339C,YPL283C,YGR296W,YHL049C,YOR396W,YLR467W,YDR545W,YFL064C,YPR202W,YPR204W,YLR466W,YFL066C,YLL067C,YER190W,YLL066C,YEL077C,YHR218W,YHL050C,YBL112C,YHR219W,YBL113C,YFL065C,YPR203W,YEL076C,YLR464W,YEL076C-A,YHR218W-A	Unknown name,Unknown name,Unknown name,Unknown name,Unknown name,Unknown name,Unknown name,YRF1-6,YRF1-7,YRF1-3,Unknown name,YRF1-8,YRF1-5,YRF1-1,Unknown name,Unknown name,Unknown name,YRF1-4,Unknown name,Unknown name,YRF1-2,Unknown name,Unknown name,Unknown name,Unknown name,Unknown name,Unknown name,Unknown name,Unknown name,Unknown name,Unknown name,Unknown name,Unknown name,Unknown name	Putative protein of unknown function | Putative Y' element ATP-dependent helicase | Putative Y' element ATP-dependent helicase | Putative protein of unknown function with similarity to helicases | Putative protein of unknown function | Helicase-like protein encoded within the telomeric Y' element | Putative Y' element ATP-dependent helicase | Helicase encoded by the Y' element of subtelomeric reg…	mitochondrion (x25) | cytoplasm (x3) | unknown (x3) | nucleus (x6)	helicase activity (x17) | unknown (x17)	DNA recombination (x7) | telomere organization (x27) | unknown (x7)	YHR218W-A	0	0	0	1	0	0	1	0	0	0	-	-	-	LAFA0G00144g	-	-	LADA0B00100g	-	-	-
48	3	3	3	2	3	3	2	3	3	3	6	LAWA0C04742g,LAWA0C04764g,LAWA0C04830g	KLTH0F05060g,KLTH0F04994g,KLTH0F05016g	LAME0G04566g,LAME0G04500g,LAME0G04522g	LAFA0G04610g,LAFA0G04654g	LACI0E08658g,LACI0E08614g,LACI0E08636g	LAFE0G04742g,LAFE0G04786g,LAFE0G04808g	LADA0E04610g,LADA0E04698g	LANO0G04500g,LANO0G04566g,LANO0G04522g	LAMI0G13388g,LAMI0G13366g,LAMI0G13454g	SAKL0C05544g,SAKL0C05566g,SAKL0C05676g	YKL163W,YJL159W,YKL164C,YJL160C,YJL158C,YKL162C-A	PIR3,HSP150,PIR1,Unknown name,CIS3,Unknown name	O-glycosylated covalently-bound cell wall protein | O-mannosylated heat shock protein | O-glycosylated protein required for cell wall stability | Putative protein of unknown function | Mannose-containing glycoprotein constituent of the cell wall | Dubious open reading frame unlikely to encode a functional protein, based on available experimental and comparative sequence data	site of polarized growth (x4) | extracellular region (x1) | cytoplasm (x2) | unknown (x1) | endoplasmic reticulum (x1) | membrane (x2) | cell wall (x1) | cellular bud (x1) | plasma membrane (x1)	unknown (x1) | structural molecule activity (x2) | ATPase activity (x4)	cell wall organization or biogenesis (x2) | unknown (x4)	YKL162C-A	0	0	0	1	0	0	1	0	0	0	-	-	-	LAFA0G04588g	-	-	LADA0E04654g	-	-	-
49	3	3	3	3	3	3	3	3	3	3	5	LAWA0E04588g,LAWA0E01992g,LAWA0G12948g	KLTH0D04554g,KLTH0D02068g,KLTH0G07128g	LAME0A04500g,LAME0B01970g,LAME0D07910g	LAFA0A03884g,LAFA0C08944g,LAFA0F18866g	LACI0B03004g,LACI0G17326g,LACI0F12200g	LAFE0C09802g,LAFE0D11254g,LAFE0A04720g	LADA0G09714g,LADA0F07470g,LADA0E07910g	LANO0D07404g,LANO0C02058g,LANO0H09692g	LAMI0G05204g,LAMI0F06348g,LAMI0D03202g	SAKL0E03762g,SAKL0B10274g,SAKL0G11110g	YMR109W,YKL129C,YOR326W,YAL029C,YHR023W	MYO5,MYO3,MYO2,MYO4,MYO1	One of two type I myosins | One of two type I myosins | Type V myosin motor involved in actin-based transport of cargos | Type V myosin motor involved in actin-based transport of cargos | Type II myosin heavy chain, required for wild-type cytokinesis and cell separation	site of polarized growth (x3) | cytoplasm (x3) | cell cortex (x5) | vacuole (x5) | membrane (x1) | mitochondrion (x1) | cytoskeleton (x4) | cellular bud (x1)	other (x2) | cytoskeletal protein binding (x3)	mitotic cell cycle (x3) | vacuole organization (x1) | cell budding (x2) | organelle inheritance (x4) | mitochondrion organization (x2) | endocytosis (x2) | response to osmotic stress (x2) | cell wall organization or biogenesis (x1) | peroxisome organization (x1) | cytoskeleton organization (x2) | cytokinesis (x1) | exocytosis (x2) | cell morphogenesis (x1)	-	0	0	0	0	0	0	0	0	0	0	-	-	-	-	-	-	-	-	-	-
50	3	3	3	3	3	3	3	3	3	3	4	LAWA0A09076g,LAWA0C08416g,LAWA0D03686g	KLTH0H04158g,KLTH0E06952g,KLTH0B06204g	LAME0B04214g,LAME0H15874g,LAME0H06480g	LAFA0G20604g,LAFA0E09252g,LAFA0D11408g	LACI0F07756g,LACI0G21374g,LACI0H07888g	LAFE0C04588g,LAFE0D04038g,LAFE0H04390g	LADA0H10132g,LADA0G03994g,LADA0D07470g	LANO0E04126g,LANO0E11760g,LANO0F08196g	LAMI0G10330g,LAMI0B00892g,LAMI0D07074g	SAKL0A04444g,SAKL0E12100g,SAKL0H24508g	YPL204W,YHR135C,YNL154C,YER123W	HRR25,YCK1,YCK2,YCK3	Protein kinase involved in regulating diverse events including vesicular trafficking, DNA repair, and chromosome segregation | Palmitoylated plasma membrane-bound casein kinase I isoform | Palmitoylated plasma membrane-bound casein kinase I isoform | Palmitoylated, vacuolar membrane-localized casein kinase I isoform	site of polarized growth (x2) | cytoplasm (x1) | endoplasmic reticulum (x2) | microtubule organizing center (x1) | vacuole (x1) | nucleus (x4) | plasma membrane (x1) | membrane (x1) | mitochondrion (x2) | cytoskeleton (x4) | cellular bud (x2) | chromosome (x1)	kinase activity (x4)	response to chemical stimulus (x1) | organelle fission (x1) | protein phosphorylation (x1) | response to DNA damage stimulus (x2) | RNA modification (x1) | chromosome segregation (x2) | endocytosis (x1) | Golgi vesicle transport (x2) | DNA repair (x1) | cytoskeleton organization (x4) | ribosomal small subunit biogenesis (x1) | cytokinesis (x2) | tRNA processing (x1) | cell morphogenesis (x1)	-	0	0	0	0	0	0	0	0	0	0	-	-	-	-	-	-	-	-	-	-
51	3	3	3	3	3	3	3	3	3	3	4	LAWA0H08240g,LAWA0G01156g,LAWA0H08636g	KLTH0H10274g,KLTH0G08206g,KLTH0H09768g	LAME0H04126g,LAME0D06854g,LAME0H03752g	LAFA0E16006g,LAFA0F19900g,LAFA0E16446g	LACI0D10154g,LACI0F18294g,LACI0H16446g	LAFE0F07888g,LAFE0H13234g,LAFE0E13058g	LADA0H12684g,LADA0E08944g,LADA0H12156g	LANO0F06150g,LANO0H08614g,LANO0F05754g	LAMI0H11540g,LAMI0F09648g,LAMI0H14444g	SAKL0E09922g,SAKL0D05940g,SAKL0D06490g	YNL093W,YOR089C,YBR264C,YKR014C	YPT53,VPS21,YPT10,YPT52	Rab family GTPase | Rab family GTPase | Rab family GTP-binding protein that contains the PEST signal sequence specific for proteolytic enzymes | Rab family GTPase, similar to Ypt51p and Ypt53p and to mammalian rab5	mitochondrion (x4) | cytoplasm (x1) | mitochondrial envelope (x1) | membrane (x1)	GTPase activity (x4) | ion binding (x1)	organelle inheritance (x3) | protein targeting (x1) | other (x1) | vacuole organization (x3) | endocytosis (x1)	-	0	0	0	0	0	0	0	0	0	0	-	-	-	-	-	-	-	-	-	-
52	3	2	2	2	4	3	2	4	2	2	5	LAWA0H00716g,LAWA0B00496g,LAWA0G12574g	KLTH0C00396g,KLTH0D00198g	LAME0E00166g,LAME0A08042g	LAFA0F22408g,LAFA0A00276g	LACI0A00848g,LACI0B05974g,LACI0E03290g,LACI0G00386g	LAFE0A08218g,LAFE0E03114g,LAFE0H17766g	LADA0B11430g,LADA0G16710g	LANO0F17568g,LANO0G18338g,LANO0D11078g,LANO0A00166g	LAMI0C11276g,LAMI0H13234g	SAKL0G17028g,SAKL0B07678g	YBR093C,YAR071W,YBR092C,YHR215W,YDL024C	PHO5,PHO11,PHO3,PHO12,DIA3	Repressible acid phosphatase (1 of 3) that also mediates extracellular nucleotide-derived phosphate hydrolysis | One of three repressible acid phosphatases, a glycoprotein that is transported to the cell surface by the secretory pathway | Constitutively expressed acid phosphatase similar to Pho5p | One of three repressible acid phosphatases, a glycoprotein that is transported to the cell surface …	extracellular region (x2) | cell wall (x1) | other (x1) | vacuole (x1) | cytoplasm (x1)	other (x1) | phosphatase activity (x4)	vitamin metabolic process (x1) | response to starvation (x1) | invasive growth in response to glucose limitation (x1) | unknown (x1) | pseudohyphal growth (x1) | other (x1)	-	0	1	1	0	0	0	0	0	0	0	-	KLTH0H00242pg	LAME0C00122g	-	-	-	-	-	-	-
53	1	3	3	3	3	3	3	3	3	3	3	LAWA0E05468g	KLTH0D05412g,KLTH0F13904g,KLTH0C05742g	LAME0G16688g,LAME0F09098g,LAME0F12002g	LAFA0F09406g,LAFA0D07668g,LAFA0D04786g	LACI0D10638g,LACI0H20846g,LACI0D05424g	LAFE0H15522g,LAFE0F05380g,LAFE0B09626g	LADA0G10528g,LADA0B05380g,LADA0H07074g	LANO0D06480g,LANO0H20318g,LANO0F12266g	LAMI0G04368g,LAMI0A07008g,LAMI0A07140g	SAKL0E03014g,SAKL0F03894g,SAKL0F13376g	YMR089C,YER017C,YPR024W	YTA12,AFG3,YME1	Component, with Afg3p, of the mitochondrial inner membrane m-AAA protease that mediates degradation of misfolded or unassembled proteins and is also required for correct assembly of mitochondrial enzyme complexes | Component, with Yta12p, of the mitochondrial inner membrane m-AAA protease | Catalytic subunit of the mitochondrial inner membrane i-AAA protease complex, which is responsible for degr…	mitochondrion (x3) | cytoplasm (x3) | mitochondrial envelope (x3) | membrane (x3)	peptidase activity (x3) | ion binding (x1) | ATPase activity (x3)	proteolysis involved in cellular protein catabolic process (x1) | protein folding (x2) | cytoplasmic translation (x2) | protein targeting (x1) | protein complex biogenesis (x2) | protein maturation (x2) | mitochondrion organization (x1) | transmembrane transport (x2)	-	2	0	0	0	0	0	0	0	0	0	LAWA0B07140g,LAWA0F04918g	-	-	-	-	-	-	-	-	-
54	3	3	3	3	3	3	3	3	3	3	3	LAWA0G12112g,LAWA0D07624g,LAWA0F11914g	KLTH0A00968g,KLTH0A03696g,KLTH0E12562g	LAME0F19768g,LAME0A02322g,LAME0H07800g	LAFA0C00782g,LAFA0A06040g,LAFA0E10528g	LACI0D12134g,LACI0G12178g,LACI0D01618g	LAFE0H17194g,LAFE0G14048g,LAFE0B05666g	LADA0C12464g,LADA0A05710g,LADA0D04632g	LANO0H00628g,LANO0B03378g,LANO0E08900g	LAMI0E04896g,LAMI0E07162g,LAMI0G12596g	SAKL0F15884g,SAKL0H10032g,SAKL0F08008g	YPR173C,YPL074W,YER047C	VPS4,YTA6,SAP1	AAA-ATPase involved in multivesicular body (MVB) protein sorting, ATP-bound Vps4p localizes to endosomes and catalyzes ESCRT-III disassembly and membrane release | Putative ATPase of the CDC48/PAS1/SEC18 (AAA) family | Putative ATPase of the AAA family, interacts with the Sin1p transcriptional repressor in the two-hybrid system	cytoplasm (x1) | cell cortex (x3) | endoplasmic reticulum (x1) | membrane (x1)	ion binding (x3) | ATPase activity (x1)	vesicle organization (x2) | endosomal transport (x1) | protein complex biogenesis (x1) | lipid metabolic process (x1) | unknown (x1)	-	0	0	0	0	0	0	0	0	0	0	-	-	-	-	-	-	-	-	-	-
55	3	3	3	3	3	3	3	3	3	3	3	LAWA0F09692g,LAWA0F06744g,LAWA0A01420g	KLTH0E10208g,KLTH0G16522g,KLTH0C10648g	LAME0D08790g,LAME0B03180g,LAME0D10088g	LAFA0C07712g,LAFA0F17942g,LAFA0F02454g	LACI0B03422g,LACI0H08790g,LACI0E01420g	LAFE0C09428g,LAFE0H05292g,LAFE0E01376g	LADA0D06942g,LADA0F06194g,LADA0B09890g	LANO0E11166g,LANO0C03510g,LANO0A06216g	LAMI0B05490g,LAMI0C07580g,LAMI0B07404g	SAKL0C11264g,SAKL0H12672g,SAKL0E01914g	YDR225W,YBL003C,YOL012C	HTA1,HTA2,HTZ1	Histone H2A, core histone protein required for chromatin assembly and chromosome function | Histone H2A, core histone protein required for chromatin assembly and chromosome function | Histone variant H2AZ, exchanged for histone H2A in nucleosomes by the SWR1 complex	nucleus (x3) | chromosome (x3)	DNA binding (x2) | other (x1)	DNA repair (x2) | chromatin organization (x1) | response to DNA damage stimulus (x2) | transcription from RNA polymerase II promoter (x2) | RNA catabolic process (x2)	-	0	0	0	0	0	0	0	0	0	0	-	-	-	-	-	-	-	-	-	-
56	3	3	3	3	3	3	3	3	3	3	3	LAWA0D10990g,LAWA0E09494g,LAWA0H03928g	KLTH0G02970g,KLTH0D09812g,KLTH0G17160g	LAME0D03378g,LAME0F04786g,LAME0B02674g	LAFA0D02806g,LAFA0E18096g,LAFA0C08218g	LACI0C07206g,LACI0G08416g,LACI0D03576g	LAFE0F15698g,LAFE0G10088g,LAFE0B07668g	LADA0G14136g,LADA0C08262g,LADA0F06700g	LANO0D02850g,LANO0H14290g,LANO0C02938g	LAMI0D10836g,LAMI0C10154g,LAMI0B03378g	SAKL0G04092g,SAKL0H08074g,SAKL0B03542g	YOR151C,YOR207C,YPR010C	RPB2,RET1,RPA135	RNA polymerase II second largest subunit B150, part of central core | Second-largest subunit of RNA polymerase III, which is responsible for the transcription of tRNA and 5S RNA genes, and other low molecular weight RNAs | RNA polymerase I second largest subunit A135	mitochondrion (x1) | cytoplasm (x1) | nucleolus (x1) | nucleus (x3)	nucleotidyltransferase activity (x3)	transcription from RNA polymerase III promoter (x1) | transcription from RNA polymerase I promoter (x1) | transcription from RNA polymerase II promoter (x1)	-	0	0	0	0	0	0	0	0	0	0	-	-	-	-	-	-	-	-	-	-
57	3	3	2	2	1	2	3	3	3	7	2	LAWA0E06766g,LAWA0F04082g,LAWA0H07294g	KLTH0C04884g,KLTH0D06798g,KLTH0H08800g	LAME0E02520g,LAME0G15368g	LAFA0D04016g,LAFA0E17370g	LACI0H15544g	LAFE0E05050g,LAFE0H12266g	LADA0H06282g,LADA0F08746g,LADA0G11848g	LANO0F04764g,LANO0F13190g,LANO0D05160g	LAMI0H13454g,LAMI0G00716g,LAMI0F10748g	SAKL0D02618g,SAKL0H20394g,SAKL0A10582g,SAKL0A10648g,SAKL0A09438g,SAKL0D15136g,SAKL0H20416g	YPR013C,YPR015C	CMR3,Unknown name	Putative zinc finger protein | Putative protein of unknown function	unknown (x2)	DNA binding (x2)	unknown (x2)	-	0	0	1	0	1	0	0	0	0	0	-	-	LAME0C05006g	-	LACI0E05226g	-	-	-	-	-
58	3	3	3	3	3	3	3	3	3	3	3	LAWA0E01574g,LAWA0B09318g,LAWA0A11232g	KLTH0D01628g,KLTH0F16236g,KLTH0H02046g	LAME0B01464g,LAME0D02762g,LAME0B06326g	LAFA0C09450g,LAFA0D14752g,LAFA0G22716g	LACI0G17744g,LACI0H23024g,LACI0H03224g	LAFE0D11672g,LAFE0F03092g,LAFE0B03334g	LADA0F07866g,LADA0B03224g,LADA0F13740g	LANO0C01596g,LANO0H22474g,LANO0E01992g	LAMI0F05930g,LAMI0E13630g,LAMI0E11672g	SAKL0B10736g,SAKL0G02354g,SAKL0F10472g	YOR341W,YOR116C,YDL140C	RPA190,RPO31,RPO21	RNA polymerase I largest subunit A190 | RNA polymerase III largest subunit C160, part of core enzyme | RNA polymerase II largest subunit B220, part of central core	mitochondrion (x1) | cytoplasm (x1) | nucleolus (x1) | nucleus (x3)	nucleotidyltransferase activity (x3)	transcription from RNA polymerase III promoter (x1) | transcription from RNA polymerase I promoter (x1) | transcription from RNA polymerase II promoter (x1)	-	0	0	0	0	0	0	0	0	0	0	-	-	-	-	-	-	-	-	-	-
59	2	1	2	3	6	4	3	2	4	3	1	LAWA0A07558g,LAWA0E00232g	KLTH0G13464g	LAME0G08570g,LAME0C00254g	LAFA0F00760g,LAFA0E05446g,LAFA0A03554g	LACI0A00166g,LACI0G00188g,LACI0H12662g,LACI0B02652g,LACI0A01486g,LACI0A01420g	LAFE0B00320g,LAFE0H09230g,LAFE0C10154g,LAFE0A07756g	LADA0E00408g,LADA0F03136g,LADA0G09318g	LANO0C06612g,LANO0D07734g	LAMI0A00430g,LAMI0H15808g,LAMI0G05556g,LAMI0D00122g	SAKL0H16808g,SAKL0C02178g,SAKL0E04246g	YDR119W	VBA4	Protein of unknown function with proposed role as a basic amino acid permease based on phylogeny	vacuole (x1) | cytoplasm (x1) | membrane (x1)	unknown (x1)	unknown (x1)	-	0	0	1	0	0	0	0	0	0	0	-	-	LAME0A04830g	-	-	-	-	-	-	-
60	2	2	2	3	2	3	4	4	3	2	3	LAWA0G09626g,LAWA0G09604g	KLTH0G09372g,KLTH0G09350g	LAME0D05886g,LAME0D05864g	LAFA0C10594g,LAFA0F20890g,LAFA0F20912g	LACI0F17194g,LACI0F17216g	LAFE0E11980g,LAFE0H01266g,LAFE0E12002g	LADA0E09978g,LADA0E09956g,LADA0H01618g,LADA0F15500g	LANO0H07624g,LANO0H07602g,LANO0A00364g,LANO0B08548g	LAMI0A00122g,LAMI0C08262g,LAMI0C08240g	SAKL0E08778g,SAKL0E08756g	YNL065W,YIL120W,YIL121W	AQR1,QDR1,QDR2	Plasma membrane transporter of the major facilitator superfamily | Multidrug transporter of the major facilitator superfamily | Plasma membrane transporter of the major facilitator superfamily	cytoplasm (x1) | plasma membrane (x3) | membrane (x3)	transmembrane transporter activity (x3)	ion transport (x1) | response to chemical stimulus (x2) | transmembrane transport (x3) | amino acid transport (x3)	-	0	0	1	0	0	0	0	0	1	0	-	-	LAME0F00232g	-	-	-	-	-	LAMI0E03246g	-
61	3	3	3	4	2	2	4	3	3	3	2	LAWA0F14554g,LAWA0C00364g,LAWA0A04038g	KLTH0F00330g,KLTH0H00220g,KLTH0E15224g	LAME0G00144g,LAME0F00276g,LAME0G18844g	LAFA0F12530g,LAFA0B07338g,LAFA0G00232g,LAFA0B08218g	LACI0G14884g,LACI0E03312g	LAFE0E03136g,LAFE0D08768g	LADA0H00188g,LADA0F15566g,LADA0D11716g,LADA0B08856g	LANO0G00188g,LANO0B07250g,LANO0A00320g	LAMI0C00166g,LAMI0E16248g,LAMI0E09824g	SAKL0B07524g,SAKL0A10670g,SAKL0A00132g	YPR058W,YBR104W	YMC1,YMC2	Putative mitochondrial inner membrane transporter | Putative mitochondrial inner membrane transporter	mitochondrion (x2) | cytoplasm (x2) | membrane (x2)	transmembrane transporter activity (x2)	other (x1) | transmembrane transport (x1)	-	0	0	0	0	0	0	0	0	0	0	-	-	-	-	-	-	-	-	-	-
62	1	2	2	2	5	4	3	2	2	5	3	LAWA0E13674g	KLTH0G03432g,KLTH0D13926g	LAME0D03774g,LAME0F07140g	LAFA0D03202g,LAFA0D09670g	LACI0A01398g,LACI0G04456g,LACI0G00298g,LACI0C06788g,LACI0C06810g	LAFE0E07360g,LAFE0F15280g,LAFE0A08372g,LAFE0F15302g	LADA0G13850g,LADA0C02806g,LADA0E12068g	LANO0D03290g,LANO0H18316g	LAMI0D11232g,LAMI0A02894g	SAKL0G04532g,SAKL0H03498g,SAKL0H03476g,SAKL0C11594g,SAKL0F00286g	YBR021W,YIR028W,YBL042C	FUR4,DAL4,FUI1	Plasma membrane localized uracil permease | Allantoin permease | High affinity uridine permease, localizes to the plasma membrane	plasma membrane (x3) | membrane (x2)	transmembrane transporter activity (x3)	nucleobase-containing compound transport (x1) | other (x1) | transmembrane transport (x2)	-	1	0	0	0	0	0	0	0	0	0	LAWA0D10572g	-	-	-	-	-	-	-	-	-
63	3	2	2	2	4	4	2	3	2	4	3	LAWA0A04896g,LAWA0D02366g,LAWA0C12596g	KLTH0G15730g,KLTH0B01958g	LAME0G10770g,LAME0E08592g	LAFA0E15192g,LAFA0G12948g	LACI0A02146g,LACI0B04280g,LACI0G02432g,LACI0F07404g	LAFE0C08614g,LAFE0A07096g,LAFE0A02278g,LAFE0D04412g	LADA0F10132g,LADA0H14400g	LANO0E15632g,LANO0G12992g,LANO0C04324g	LAMI0A07624g,LAMI0H01464g	SAKL0G14102g,SAKL0C10186g,SAKL0G17204g,SAKL0H24926g	YGR192C,YJR009C,YJL052W	TDH3,TDH2,TDH1	Glyceraldehyde-3-phosphate dehydrogenase, isozyme 3 | Glyceraldehyde-3-phosphate dehydrogenase, isozyme 2 | Glyceraldehyde-3-phosphate dehydrogenase, isozyme 1	mitochondrion (x3) | cell wall (x3) | membrane (x3) | plasma membrane (x3) | cytoplasm (x3)	oxidoreductase activity (x3)	carbohydrate metabolic process (x3) | generation of precursor metabolites and energy (x3)	-	0	0	0	0	0	0	1	0	0	0	-	-	-	-	-	-	LADA0F05424g	-	-	-
64	3	3	3	3	3	3	3	3	2	3	3	LAWA0D06062g,LAWA0G13278g,LAWA0B11738g	KLTH0E09262g,KLTH0G06798g,KLTH0F18744g	LAME0F17854g,LAME0D08218g,LAME0F15082g	LAFA0F11430g,LAFA0F18492g,LAFA0G19394g	LACI0B02300g,LACI0F12530g,LACI0F01640g	LAFE0C10506g,LAFE0A04390g,LAFE0G17876g	LADA0E02124g,LADA0E07602g,LADA0H10704g	LANO0H02718g,LANO0H10000g,LANO0E05292g	LAMI0G00122g,LAMI0D03532g	SAKL0E04576g,SAKL0G10802g,SAKL0C12650g	YLR034C,YHR050W,YOL122C	SMF3,SMF2,SMF1	Putative divalent metal ion transporter involved in iron homeostasis | Divalent metal ion transporter involved in manganese homeostasis | Divalent metal ion transporter with a broad specificity for di-valent and tri-valent metals	cytoplasm (x2) | vacuole (x1) | cytoplasmic membrane-bounded vesicle (x3) | membrane (x1) | mitochondrion (x1) | plasma membrane (x1)	transmembrane transporter activity (x3)	ion transport (x3) | cellular ion homeostasis (x3)	-	0	0	0	0	0	0	0	0	0	0	-	-	-	-	-	-	-	-	-	-
65	3	3	3	3	3	3	3	3	2	3	3	LAWA0H02300g,LAWA0C08658g,LAWA0C06216g	KLTH0G18832g,KLTH0B05940g,KLTH0F06490g	LAME0A07470g,LAME0H06216g,LAME0G05864g	LAFA0A00848g,LAFA0E08988g,LAFA0G05996g	LACI0H00804g,LACI0G10418g,LACI0E07162g	LAFE0B00980g,LAFE0G12288g,LAFE0G06282g	LADA0D07734g,LADA0C11672g,LADA0E06018g	LANO0D10462g,LANO0E12024g,LANO0G05842g	LAMI0G17150g,LAMI0G14796g	SAKL0B00968g,SAKL0E11814g,SAKL0C07370g	YFL039C,YHR129C,YDL029W	ACT1,ARP1,ARP2	Actin, structural protein involved in cell polarization, endocytosis, and other cytoskeletal functions | Actin-related protein of the dynactin complex | Essential component of the Arp2/3 complex, which is a highly conserved actin nucleation center required for the motility and integrity of actin patches	site of polarized growth (x2) | cytoplasm (x1) | cell cortex (x1) | microtubule organizing center (x3) | nucleus (x3) | mitochondrion (x1) | cytoskeleton (x1) | cellular bud (x1) | chromosome (x1)	structural molecule activity (x1) | ion binding (x1) | ATPase activity (x2)	histone modification (x1) | mitotic cell cycle (x1) | protein acylation (x2) | protein complex biogenesis (x1) | response to oxidative stress (x1) | regulation of organelle organization (x3) | organelle inheritance (x1) | nucleobase-containing small molecule metabolic process (x1) | DNA repair (x1) | cell wall organization or biogenesis (x2) | cytokinesis (x2) | cell budding (x1) | chromatin orga…	-	0	0	0	0	0	0	0	0	0	0	-	-	-	-	-	-	-	-	-	-
66	3	2	2	2	3	2	1	2	2	5	7	LAWA0C06502g,LAWA0E02938g,LAWA0A08306g	KLTH0F06754g,KLTH0G12386g	LAME0G06150g,LAME0G07118g	LAFA0G06282g,LAFA0E04016g	LACI0E06876g,LACI0E06898g,LACI0H11606g	LAFE0G06590g,LAFE0H08130g	LADA0F01728g	LANO0G06150g,LANO0C08020g	LAMI0G15104g,LAMI0H16798g	SAKL0F07172g,SAKL0H15664g,SAKL0C02970g,SAKL0E15356g,SAKL0H00330g	YLR121C,YIL015W,YLR120C,YDR144C,YIR039C,YGL258W-A,YGL259W	YPS3,BAR1,YPS1,MKC7,YPS6,Unknown name,YPS5	Aspartic protease, member of the yapsin family of proteases involved in cell wall growth and maintenance | Aspartyl protease secreted into the periplasmic space of mating type a cells, helps cells find mating partners, cleaves and inactivates alpha factor allowing cells to recover from alpha-factor-induced cell cycle arrest | Aspartic protease | GPI-anchored aspartyl protease | Putative GPI-ancho…	cell wall (x3) | other (x2) | unknown (x1) | plasma membrane (x1) | membrane (x1)	peptidase activity (x1) | unknown (x6)	response to chemical stimulus (x2) | unknown (x4) | conjugation (x1) | signaling (x1) | protein maturation (x1) | cell wall organization or biogenesis (x1)	-	0	0	0	0	0	0	1	0	0	0	-	-	-	-	-	-	LADA0E03422g	-	-	-
67	2	4	2	2	3	3	3	3	1	3	1	LAWA0F15588g,LAWA0H00584g	KLTH0E00462g,KLTH0B10054g,KLTH0A01034g,KLTH0G19668g	LAME0D11298g,LAME0C00430g	LAFA0G24476g,LAFA0C00848g	LACI0A01200g,LACI0D12068g,LACI0A00650g	LAFE0A00210g,LAFE0H17128g,LAFE0G00144g	LADA0D09120g,LADA0C12398g,LADA0B11518g	LANO0H00694g,LANO0B00364g,LANO0F00232g	LAMI0D00254g	SAKL0F16478g,SAKL0H01650g,SAKL0B02112g	YGR260W	TNA1	High affinity nicotinic acid plasma membrane permease, responsible for uptake of low levels of nicotinic acid	mitochondrion (x1) | cytoplasm (x1) | plasma membrane (x1) | membrane (x1)	transmembrane transporter activity (x1)	nucleobase-containing compound transport (x1)	-	0	0	0	2	0	0	0	1	1	0	-	-	-	LAFA0G24718g,LAFA0A00100g	-	-	-	LANO0D11276g	LAMI0B08746g	-
68	3	2	3	2	4	4	3	2	1	4	2	LAWA0B00320g,LAWA0B01288g,LAWA0E06722g	KLTH0E01496g,KLTH0D06754g	LAME0G00716g,LAME0F03532g,LAME0G15412g	LAFA0F15896g,LAFA0F08130g	LACI0B02212g,LACI0G01728g,LACI0F02410g,LACI0H17612g	LAFE0C10572g,LAFE0A01530g,LAFE0H14378g,LAFE0G17150g	LADA0C00210g,LADA0D01530g,LADA0G11804g	LANO0E06106g,LANO0D05204g	LAMI0F10814g	SAKL0D09350g,SAKL0G15224g,SAKL0F14674g,SAKL0A09394g	YPR194C,YJL212C	OPT2,OPT1	Oligopeptide transporter | Proton-coupled oligopeptide transporter of the plasma membrane	plasma membrane (x2) | membrane (x2)	other (x1) | transmembrane transporter activity (x1)	membrane fusion (x1) | other (x1) | vacuole organization (x1)	-	0	0	0	0	0	0	0	0	1	0	-	-	-	-	-	-	-	-	LAMI0G15522g	-
69	3	3	2	2	4	4	2	2	2	4	1	LAWA0G08020g,LAWA0H09450g,LAWA0B00980g	KLTH0G10736g,KLTH0B08140g,KLTH0E01144g	LAME0A00628g,LAME0F03884g	LAFA0A07690g,LAFA0E18976g	LACI0D08108g,LACI0G25510g,LACI0E06458g,LACI0H25070g	LAFE0B00188g,LAFE0G07052g,LAFE0C12288g,LAFE0F00936g	LADA0F00298g,LADA0D01178g	LANO0G18360g,LANO0E05754g	LAMI0G02652g,LAMI0C02938g	SAKL0G15136g,SAKL0G14762g,SAKL0D01232g,SAKL0E14806g	YDL210W	UGA4	Permease that serves as a gamma-aminobutyrate (GABA) transport protein involved in the utilization of GABA as a nitrogen source	vacuole (x1) | cytoplasm (x1) | membrane (x1)	transmembrane transporter activity (x1)	ion transport (x1) | transmembrane transport (x1) | amino acid transport (x1)	-	0	0	0	0	0	1	0	0	0	1	-	-	-	-	-	LAFE0D00386g	-	-	-	SAKL0G08976pg
70	4	3	1	2	3	3	1	2	1	4	6	LAWA0G17832g,LAWA0H00474g,LAWA0B01442g,LAWA0D00342g	KLTH0E01540g,KLTH0C01056g,KLTH0E16676g	LAME0F03488g	LAFA0F15918g,LAFA0F15962g	LACI0F02454g,LACI0H25576g,LACI0F00320g	LAFE0G19130g,LAFE0F00452g,LAFE0G17106g	LADA0D01574g	LANO0A00298g,LANO0E06150g	LAMI0G15478g	SAKL0F14762g,SAKL0F14740g,SAKL0F14784g,SAKL0F14718g	YOL152W,YOR384W,YKL220C,YOR381W,YNR060W,YLL051C	FRE7,FRE5,FRE2,FRE3,FRE4,FRE6	Putative ferric reductase with similarity to Fre2p | Putative ferric reductase with similarity to Fre2p | Ferric reductase and cupric reductase, reduces siderophore-bound iron and oxidized copper prior to uptake by transporters | Ferric reductase, reduces siderophore-bound iron prior to uptake by transporters | Ferric reductase, reduces a specific subset of siderophore-bound iron prior to uptake …	mitochondrion (x2) | cytoplasm (x6) | vacuole (x1) | plasma membrane (x4) | membrane (x1)	oxidoreductase activity (x6)	ion transport (x1) | transmembrane transport (x3) | cellular ion homeostasis (x3) | unknown (x3)	-	0	0	0	0	0	0	0	0	0	0	-	-	-	-	-	-	-	-	-	-
71	2	3	4	3	2	3	2	3	1	3	2	LAWA0H00760g,LAWA0G17700g	KLTH0C00374g,KLTH0A07722g,KLTH0F09064g	LAME0A00606g,LAME0C06898g,LAME0F00188g,LAME0E00144g	LAFA0A07712g,LAFA0C04610g,LAFA0F12464g	LACI0E00430g,LACI0H10462g	LAFE0E00364g,LAFE0H06964g,LAFE0A08350g	LADA0F00276g,LADA0B11452g	LANO0G18382g,LANO0F17590g,LANO0A00408g	LAMI0B08482g	SAKL0H14388g,SAKL0H15510g,SAKL0F16346g	YGL255W,YLR130C	ZRT1,ZRT2	High-affinity zinc transporter of the plasma membrane, responsible for the majority of zinc uptake | Low-affinity zinc transporter of the plasma membrane	plasma membrane (x2) | membrane (x2)	transmembrane transporter activity (x2)	ion transport (x2) | transmembrane transport (x2)	-	0	0	0	0	0	0	1	0	0	1	-	-	-	-	-	-	LADA0A03972g	-	-	SAKL0A00110pg
72	1	2	2	1	4	2	2	1	2	2	4	LAWA0F07118g	KLTH0H05280g,KLTH0E16984g	LAME0C08416g,LAME0D11320g	LAFA0C03004g	LACI0B00144g,LACI0F20340g,LACI0G20274g,LACI0E00122g	LAFE0G01112g,LAFE0C05732g	LADA0E00232g,LADA0H04324g	LANO0F01332g	LAMI0B00100g,LAMI0F07624g	SAKL0E05258g,SAKL0A05676g	YBR298C,YJR160C,YDL247W,YGR289C	MAL31,MPH3,MPH2,MAL11	Maltose permease, high-affinity maltose transporter (alpha-glucoside transporter) | Alpha-glucoside permease, transports maltose, maltotriose, alpha-methylglucoside, and turanose | Alpha-glucoside permease, transports maltose, maltotriose, alpha-methylglucoside, and turanose | Inducible high-affinity maltose transporter (alpha-glucoside transporter)	plasma membrane (x4) | membrane (x3)	transmembrane transporter activity (x4)	other (x1) | transmembrane transport (x3) | carbohydrate metabolic process (x1) | carbohydrate transport (x1) | oligosaccharide metabolic process (x1)	-	0	0	0	2	2	0	2	0	0	0	-	-	-	LAFA0D17546g,LAFA0E00210g	LACI0F00122g,LACI0G00122g	-	LADA0C00144g,LADA0G16798g	-	-	-
73	3	3	2	3	2	2	3	3	2	2	1	LAWA0D08218g,LAWA0D11562g,LAWA0C01904g	KLTH0G05786g,KLTH0G02420g,KLTH0F01892g	LAME0H10506g,LAME0H19064g	LAFA0E13234g,LAFA0D02322g,LAFA0G01816g	LACI0C04522g,LACI0C07690g	LAFE0F12970g,LAFE0F16182g	LADA0G07118g,LADA0G14620g,LADA0H01794g	LANO0H11100g,LANO0D02366g,LANO0G01728g	LAMI0H02410g,LAMI0F11276g	SAKL0F14278g,SAKL0F02574g	YJR096W	Unknown name	Putative xylose and arabinose reductase	cytoplasm (x1) | nucleus (x1)	oxidoreductase activity (x1)	response to chemical stimulus (x1) | carbohydrate metabolic process (x1) | response to oxidative stress (x1)	-	1	0	0	0	0	0	0	0	0	2	LAWA0C01882g	-	-	-	-	-	-	-	-	SAKL0D15004pg,SAKL0G19998pg
74	2	3	1	2	4	4	3	3	2	2	0	LAWA0G17744g,LAWA0G00298g	KLTH0A07766g,KLTH0E00176g,KLTH0A00484g	LAME0F00254g	LAFA0F12508g,LAFA0B08284g	LACI0D00166g,LACI0G00628g,LACI0G25488g,LACI0D00188g	LAFE0A00408g,LAFE0B00166g,LAFE0H00606g,LAFE0F00232g	LADA0F15544g,LADA0B08746g,LADA0B09010g	LANO0A00342g,LANO0H15258g,LANO0A05182g	LAMI0D00386g,LAMI0C00122g	SAKL0B12518g,SAKL0F16588g	-	-	-	-	-	-	-	0	0	0	0	0	0	1	0	0	0	-	-	-	-	-	-	LADA0B08988g	-	-	-
75	3	2	2	2	2	2	3	3	2	3	3	LAWA0D13608g,LAWA0E13982g,LAWA0A06348g	KLTH0B09196g,KLTH0G14278g	LAME0H01068g,LAME0G09340g	LAFA0E01134g,LAFA0E06216g	LACI0H13432g,LACI0F19482g	LAFE0H10000g,LAFE0E14180g	LADA0G16468g,LADA0B01552g,LADA0F03884g	LANO0D00496g,LANO0C08768g,LANO0C05798g	LAMI0H15038g,LAMI0F15720g	SAKL0F00528g,SAKL0H01210g,SAKL0H17754g	YGL251C,YER172C,YGR271W	HFM1,BRR2,SLH1	Meiosis specific DNA helicase involved in the conversion of double-stranded breaks to later recombination intermediates and in crossover control | RNA-dependent ATPase RNA helicase (DEIH box) | Putative RNA helicase related to Ski2p, involved in translation inhibition of non-poly(A) mRNAs	cytoplasm (x1) | ribosome (x2) | nucleus (x1)	helicase activity (x1) | ATPase activity (x3)	RNA splicing (x1) | mRNA processing (x1) | cytoplasmic translation (x1) | regulation of translation (x1) | DNA recombination (x1) | DNA replication (x1)	-	0	0	0	0	0	0	0	0	0	0	-	-	-	-	-	-	-	-	-	-
76	2	5	3	3	1	1	3	3	2	2	2	LAWA0D07404g,LAWA0B09142g	KLTH0E15532g,KLTH0A03476g,KLTH0E00220g,KLTH0A00528g,KLTH0F16060g	LAME0F06524g,LAME0A02520g,LAME0D02938g	LAFA0A05842g,LAFA0F03312g,LAFA0D14576g	LACI0H22848g	LAFE0F03268g	LADA0B08944g,LADA0B08812g,LADA0A05908g	LANO0B03180g,LANO0A05248g,LANO0H22298g	LAMI0A01860g,LAMI0E13806g	SAKL0G02530g,SAKL0C10626g	YOR120W,YDR368W	GCY1,YPR1	Glycerol dehydrogenase | NADPH-dependent aldo-keto reductase	cytoplasm (x2) | nucleus (x2)	RNA binding (x1) | oxidoreductase activity (x1) | mRNA binding (x2)	response to chemical stimulus (x2) | carbohydrate metabolic process (x2) | response to oxidative stress (x2)	-	0	0	0	0	0	0	0	0	0	0	-	-	-	-	-	-	-	-	-	-
77	1	0	0	3	0	0	0	4	0	0	0	LAWA0B13146g	-	-	LAFA0B08394g,LAFA0F22716g,LAFA0F22738g	-	-	-	LANO0F00122g,LANO0B00122g,LANO0D00100g,LANO0F00100g	-	-	-	-	-	-	-	-	-	6	0	0	0	0	1	1	10	0	0	LAWA0B13102g,LAWA0H14510g,LAWA0H14488g,LAWA0D13784g,LAWA0G04412g,LAWA0H14466g	-	-	-	-	LAFE0D00100g	LADA0G00188g	LANO0C00144g,LANO0D11342g,LANO0F17832g,LANO0E17062g,LANO0B08966g,LANO0G18514g,LANO0H25444g,LANO0D00122g,LANO0F17788g,LANO0A07668g	-	-
78	1	1	0	1	5	3	4	1	1	2	4	LAWA0A08086g	KLTH0F04026g	-	LAFA0B08306g	LACI0B00210g,LACI0E00144g,LACI0G25466g,LACI0C09582g,LACI0D00254g	LAFE0C01860g,LAFE0D00540g,LAFE0C13256g	LADA0F00188g,LADA0C13014g,LADA0B10968g,LADA0G16732g	LANO0A04918g	LAMI0B08878g	SAKL0D15158g,SAKL0B00176g	YOL151W,YGL157W,YDR541C,YGL039W	GRE2,ARI1,Unknown name,Unknown name	3-methylbutanal reductase and NADPH-dependent methylglyoxal reductase (D-lactaldehyde dehydrogenase) | NADPH-dependent aldehyde reductase, utilizes aromatic and alophatic aldehyde substrates | Putative dihydrokaempferol 4-reductase | Oxidoreductase shown to reduce carbonyl compounds to chiral alcohols	nucleus (x1) | cytoplasm (x3) | unknown (x2)	oxidoreductase activity (x4)	other (x2) | lipid metabolic process (x1) | unknown (x1)	-	0	0	0	0	0	0	0	0	0	3	-	-	-	-	-	-	-	-	-	SAKL0D00154pg,SAKL0H00308pg,SAKL0E15433pg
79	2	2	2	2	3	3	2	2	2	2	3	LAWA0H01706g,LAWA0F11012g	KLTH0C01342g,KLTH0E11572g	LAME0E01134g,LAME0H08768g	LAFA0F21418g,LAFA0E11474g	LACI0C01002g,LACI0G11122g,LACI0G01992g	LAFE0C12904g,LAFE0G12992g,LAFE0A01838g	LADA0H19680g,LADA0D05622g	LANO0F16578g,LANO0E09890g	LAMI0G02014g,LAMI0A01310g	SAKL0G18964g,SAKL0H11154g	YKL081W,YPL048W,YGR201C	TEF4,CAM1,Unknown name	Gamma subunit of translational elongation factor eEF1B, stimulates the binding of aminoacyl-tRNA (AA-tRNA) to ribosomes by releasing eEF1A (Tef1p/Tef2p) from the ribosomal complex | Nuclear protein required for transcription of MXR1 | Putative protein of unknown function	mitochondrion (x1) | cytoplasm (x1) | ribosome (x1) | unknown (x1) | nucleus (x1)	unknown (x1) | lipid binding (x1) | RNA binding (x1) | protein binding transcription factor activity (x1) | translation factor activity, nucleic acid binding (x1) | ion binding (x1)	translational elongation (x1) | transcription from RNA polymerase II promoter (x1) | unknown (x1)	-	0	0	0	0	0	0	0	1	0	0	-	-	-	-	-	-	-	LANO0G10330g	-	-
80	3	3	1	2	3	2	3	2	3	3	0	LAWA0D00232g,LAWA0G00254g,LAWA0B08130g	KLTH0E03168g,KLTH0F14916g,KLTH0C11880g	LAME0F10000g	LAFA0D06678g,LAFA0F03422g	LACI0G00540g,LACI0H21814g,LACI0G19020g	LAFE0H00562g,LAFE0F04368g	LADA0G05050g,LADA0B04368g,LADA0B08790g	LANO0H21308g,LANO0A05226g	LAMI0H04016g,LAMI0G17744g,LAMI0C00100g	SAKL0F16654g,SAKL0F02684g,SAKL0F02640g	-	-	-	-	-	-	-	0	0	0	0	0	0	0	1	0	0	-	-	-	-	-	-	-	LANO0A07338g	-	-
81	2	3	2	1	4	3	2	2	2	2	0	LAWA0H13652g,LAWA0G00364g	KLTH0H15554g,KLTH0C11836g,KLTH0F04070g	LAME0A01244g,LAME0F13652g	LAFA0F03378g	LACI0F10660g,LACI0G25532g,LACI0H00166g,LACI0G18976g	LAFE0D01244g,LAFE0B00144g,LAFE0H00628g	LADA0F01024g,LADA0B08878g	LANO0G17678g,LANO0A05292g	LAMI0D12772g,LAMI0C00210g	SAKL0E05016g,SAKL0F16566g	-	-	-	-	-	-	-	0	1	0	0	1	0	0	0	0	0	-	KLTH0A00198pg	-	-	LACI0A00408g	-	-	-	-	-
82	2	2	2	2	3	3	2	2	2	3	2	LAWA0A04676g,LAWA0E14114g	KLTH0G15950g,KLTH0B09328g	LAME0G10968g,LAME0H00936g	LAFA0E14994g,LAFA0E01024g	LACI0B04082g,LACI0H15412g,LACI0F19570g	LAFE0C08812g,LAFE0H12112g,LAFE0E14268g	LADA0F05622g,LADA0B01442g	LANO0C04104g,LANO0C08922g	LAMI0C06898g,LAMI0F15830g	SAKL0C10406g,SAKL0H20262g,SAKL0H01122g	YBR139W,YMR297W	Unknown name,PRC1	Putative serine type carboxypeptidase with a role in phytochelatin synthesis | Vacuolar carboxypeptidase Y (proteinase C	vacuole (x2) | cytoplasm (x1) | endoplasmic reticulum (x2)	peptidase activity (x2)	other (x2)	-	0	0	0	0	0	0	0	0	0	0	-	-	-	-	-	-	-	-	-	-
83	1	2	4	3	1	1	2	3	1	1	1	LAWA0F15456g	KLTH0G19756g,KLTH0G19360g	LAME0A07998g,LAME0F17480g,LAME0B00210g,LAME0A00166g	LAFA0E22056g,LAFA0B08328g,LAFA0A00298g	LACI0C09604g	LAFE0D00562g	LADA0E00452g,LADA0B06458g	LANO0D11012g,LANO0E00144g,LANO0H25378g	LAMI0F07866g	SAKL0C04136g	YKL107W	Unknown name	Putative short-chain dehydrogenase/reductase	unknown (x1)	unknown (x1)	unknown (x1)	-	0	1	1	2	0	0	0	1	0	0	-	KLTH0F04829pg	LAME0A08152g	LAFA0A07866g,LAFA0C10792g	-	-	-	LANO0C00232g	-	-
84	2	2	1	3	2	2	2	2	2	2	3	LAWA0H00628g,LAWA0D00562g	KLTH0G00418g,KLTH0D17930g	LAME0G17546g	LAFA0F22474g,LAFA0F00232g,LAFA0F10286g	LACI0F00210g,LACI0G01420g	LAFE0G00276g,LAFE0A01244g	LADA0G09362g,LADA0A07800g	LANO0F00210g,LANO0B01244g	LAMI0C10990g,LAMI0C00848g	SAKL0G18172g,SAKL0B00242g	YLL058W,YJR130C,YML082W	Unknown name,STR2,Unknown name	Putative protein of unknown function with similarity to Str2p, which is a cystathionine gamma-synthase important in sulfur metabolism | Cystathionine gamma-synthase, converts cysteine into cystathionine | Putative protein predicted to have carbon-sulfur lyase activity	nucleus (x1) | cytoplasm (x2) | unknown (x2)	transferase activity, transferring alkyl or aryl (other than methyl) groups (x1) | lyase activity (x2)	cellular amino acid metabolic process (x1) | other (x2)	-	0	0	0	0	0	0	1	1	0	0	-	-	-	-	-	-	LADA0F15808g	LANO0F17634g	-	-
85	1	2	2	1	1	1	3	2	1	2	3	LAWA0E14070g	KLTH0B09284g,KLTH0E05808g	LAME0H00980g,LAME0H01002g	LAFA0E01068g	LACI0H00254g	LAFE0C01706g	LADA0B01486g,LADA0D13344g,LADA0E09516g	LANO0C08878g,LANO0C08856g	LAMI0F15786g	SAKL0C00220g,SAKL0B00286g	YER185W,YGR213C,YLR046C	PUG1,RTA1,Unknown name	Plasma membrane protein with roles in the uptake of protoprophyrin IX and the efflux of heme | Protein involved in 7-aminocholesterol resistance | Putative membrane protein	plasma membrane (x3) | membrane (x2)	unknown (x3)	other (x2) | unknown (x1)	-	0	0	0	0	0	2	0	0	0	4	-	-	-	-	-	LAFE0F00342g,LAFE0E15126g	-	-	-	SAKL0E00418pg,SAKL0E00308pg,SAKL0E00506pg,SAKL0E00440pg
86	2	2	0	6	0	0	0	1	4	0	0	LAWA0G09142g,LAWA0H00848g	KLTH0E14938g,KLTH0B05060g	-	LAFA0D00166g,LAFA0G01618g,LAFA0F21594g,LAFA0C03664g,LAFA0D07844g,LAFA0F22628g	-	-	-	LANO0C03070g	LAMI0E10550g,LAMI0G15280g,LAMI0C07954g,LAMI0H04104g	-	-	-	-	-	-	-	-	0	3	3	3	0	0	0	0	1	0	-	KLTH0H00484pg,KLTH0E03366pg,KLTH0F09427pg	LAME0A00408g,LAME0E11144g,LAME0D10968g	LAFA0G12530g,LAFA0B01178g,LAFA0F09692g	-	-	-	-	LAMI0G13410g	-
87	2	2	2	2	2	2	2	2	3	2	2	LAWA0A10528g,LAWA0E13234g	KLTH0H02728g,KLTH0D13442g	LAME0B05600g,LAME0F02146g	LAFA0G22012g,LAFA0D10066g	LACI0G22826g,LACI0G04918g	LAFE0C03114g,LAFE0E06920g	LADA0F13036g,LADA0G05512g	LANO0E02696g,LANO0H17876g	LAMI0E05094g,LAMI0A03356g,LAMI0C02366g	SAKL0A02926g,SAKL0H04114g	YAL067C,YGR065C	SEO1,VHT1	Putative permease, member of the allantoate transporter subfamily of the major facilitator superfamily | High-affinity plasma membrane H+-biotin (vitamin H) symporter	plasma membrane (x2) | membrane (x1)	other (x2)	ion transport (x1) | other (x1)	-	0	0	0	0	0	0	0	0	0	1	-	-	-	-	-	-	-	-	-	SAKL0B00396pg
88	2	2	2	2	2	2	3	3	2	2	2	LAWA0C10550g,LAWA0D11716g	KLTH0G02266g,KLTH0B03894g	LAME0C06414g,LAME0H19240g	LAFA0C05116g,LAFA0D02168g	LACI0A02300g,LACI0C07822g	LAFE0F16314g,LAFE0A06854g	LADA0A04500g,LADA0D09670g,LADA0G14774g	LANO0E13850g,LANO0F03334g,LANO0D02212g	LAMI0H08284g,LAMI0F11408g	SAKL0G13376g,SAKL0F02442g	YPR156C,YGR138C	TPO3,TPO2	Polyamine transporter of the major facilitator superfamily | Polyamine transporter of the major facilitator superfamily	vacuole (x2) | cytoplasm (x2) | plasma membrane (x2) | membrane (x2)	transmembrane transporter activity (x2)	ion transport (x2)	-	0	0	0	0	0	0	0	0	0	0	-	-	-	-	-	-	-	-	-	-
89	2	2	2	3	2	2	2	2	2	2	3	LAWA0A09934g,LAWA0H10176g	KLTH0H03300g,KLTH0H11902g	LAME0B05050g,LAME0E09890g	LAFA0G21462g,LAFA0G13982g,LAFA0C06194g	LACI0G22188g,LACI0D08614g	LAFE0C03774g,LAFE0F09494g	LADA0F12486g,LADA0H15522g	LANO0E03268g,LANO0G14026g	LAMI0G09516g,LAMI0A05380g	SAKL0A03586g,SAKL0D08316g	YNL014W,YPL226W,YLR249W	HEF3,NEW1,YEF3	Translational elongation factor EF-3 | ATP binding cassette protein that cosediments with polysomes and is required for biogenesis of the small ribosomal subunit | Gamma subunit of translational elongation factor eEF1B	mitochondrion (x3) | cytoplasm (x1) | ribosome (x2)	RNA binding (x3) | ion binding (x2) | ATPase activity (x1) | translation factor activity, nucleic acid binding (x2)	nuclear transport (x1) | translational elongation (x1) | nucleobase-containing compound transport (x1) | ribosomal small subunit biogenesis (x2)	-	0	0	0	0	0	0	0	0	0	0	-	-	-	-	-	-	-	-	-	-
90	2	2	2	2	2	2	2	2	2	2	3	LAWA0H10968g,LAWA0F03004g	KLTH0H12716g,KLTH0C03850g	LAME0E10484g,LAME0G13366g	LAFA0E21440g,LAFA0G24520g	LACI0C01948g,LACI0E06238g	LAFE0F10396g,LAFE0G07250g	LADA0H16402g,LADA0H05248g	LANO0G14840g,LANO0F14180g	LAMI0A00298g,LAMI0A08834g	SAKL0D09306g,SAKL0D01452g	YPL273W,YLL062C,YMR321C	SAM4,MHT1,Unknown name	S-adenosylmethionine-homocysteine methyltransferase, functions along with Mht1p in the conversion of S-adenosylmethionine (AdoMet) to methionine to control the methionine/AdoMet ratio | S-methylmethionine-homocysteine methyltransferase, functions along with Sam4p in the conversion of S-adenosylmethionine (AdoMet) to methionine to control the methionine/AdoMet ratio | Putative protein of unknown f…	nucleus (x1) | cytoplasm (x2) | unknown (x1)	methyltransferase activity (x2) | unknown (x1)	nucleobase-containing small molecule metabolic process (x1) | cellular amino acid metabolic process (x2) | cofactor metabolic process (x1) | unknown (x1)	-	0	0	0	0	0	0	0	0	1	0	-	-	-	-	-	-	-	-	LAMI0G01420g	-
91	2	2	2	2	2	2	2	2	2	3	3	LAWA0H13806g,LAWA0C06788g	KLTH0H15708g,KLTH0F06974g	LAME0A01090g,LAME0G06370g	LAFA0A07228g,LAFA0G06524g	LACI0F10836g,LACI0E06590g	LAFE0D01068g,LAFE0G06920g	LADA0F00870g,LADA0E03686g	LANO0G17832g,LANO0G06436g	LAMI0D12948g,LAMI0G15390g	SAKL0E05302g,SAKL0D01056g,SAKL0C09438g	YMR145C,YDL085W,YML120C	NDE1,NDE2,NDI1	Mitochondrial external NADH dehydrogenase | Mitochondrial external NADH dehydrogenase | NADH:ubiquinone oxidoreductase	mitochondrion (x3) | cytoplasm (x3)	oxidoreductase activity (x3)	generation of precursor metabolites and energy (x2) | cofactor metabolic process (x1) | nucleobase-containing small molecule metabolic process (x3) | carbohydrate metabolic process (x3) | cellular respiration (x3)	-	0	0	0	0	0	0	0	0	0	0	-	-	-	-	-	-	-	-	-	-
92	2	2	2	2	3	3	2	2	2	3	1	LAWA0D09472g,LAWA0C09714g	KLTH0G04532g,KLTH0B04774g	LAME0H11716g,LAME0C04368g	LAFA0E14422g,LAFA0B04038g	LACI0C05754g,LACI0H01992g,LACI0G21220g	LAFE0F14224g,LAFE0B02146g,LAFE0C04742g	LADA0G08328g,LADA0D08790g	LANO0H12288g,LANO0E13058g	LAMI0G11144g,LAMI0A00826g	SAKL0G05676g,SAKL0F11704g,SAKL0A04598g	YDL174C	DLD1	D-lactate dehydrogenase, oxidizes D-lactate to pyruvate, transcription is heme-dependent, repressed by glucose, and derepressed in ethanol or lactate	mitochondrion (x1) | cytoplasm (x1) | mitochondrial envelope (x1) | membrane (x1)	oxidoreductase activity (x1)	generation of precursor metabolites and energy (x1) | carbohydrate metabolic process (x1) | cellular respiration (x1)	-	0	0	0	0	0	0	0	0	0	0	-	-	-	-	-	-	-	-	-	-
93	2	2	1	2	2	2	4	3	2	2	1	LAWA0D12002g,LAWA0D04478g	KLTH0G02002g,KLTH0E07678g	LAME0H19438g	LAFA0D01948g,LAFA0F00364g	LACI0C08020g,LACI0F08548g	LAFE0F16512g,LAFE0D03268g	LADA0G14972g,LADA0A00100g,LADA0G04676g,LADA0G09296g	LANO0D01992g,LANO0C00320g,LANO0F07492g	LAMI0F11672g,LAMI0A00474g	SAKL0F02156g,SAKL0H21824g	YGL202W	ARO8	Aromatic aminotransferase I, expression is regulated by general control of amino acid biosynthesis	cytoplasm (x1)	other (x1)	cellular amino acid metabolic process (x1)	-	0	0	1	0	0	0	0	0	0	0	-	-	LAME0F01420g	-	-	-	-	-	-	-
94	1	2	2	2	2	2	2	2	2	3	3	LAWA0E14642g	KLTH0G17754g,KLTH0B09856g	LAME0A06568g,LAME0H00386g	LAFA0A01772g,LAFA0E00408g	LACI0D04126g,LACI0F20142g	LAFE0B08284g,LAFE0E14884g	LADA0C10814g,LADA0E14796g	LANO0D09494g,LANO0C09516g	LAMI0B02872g,LAMI0F16380g	SAKL0B04158g,SAKL0H00506g,SAKL0A01650g	YLR342W,YGR032W,YMR306W	FKS1,GSC2,FKS3	Catalytic subunit of 1,3-beta-D-glucan synthase | Catalytic subunit of 1,3-beta-glucan synthase | Protein involved in spore wall assembly, has similarity to 1,3-beta-D-glucan synthase catalytic subunits Fks1p and Gsc2p	site of polarized growth (x2) | cytoplasm (x1) | cell cortex (x3) | membrane (x2) | mitochondrion (x3) | cytoskeleton (x2) | cellular bud (x2) | plasma membrane (x1)	transferase activity, transferring glycosyl groups (x3)	cell wall organization or biogenesis (x2) | regulation of transport (x2) | carbohydrate metabolic process (x1) | sporulation (x1) | endocytosis (x2)	-	1	0	0	0	0	0	0	0	0	0	LAWA0H03356g	-	-	-	-	-	-	-	-	-
95	2	2	2	2	2	2	2	2	2	2	4	LAWA0C06084g,LAWA0G09516g	KLTH0F06358g,KLTH0G09306g	LAME0G05754g,LAME0D05908g	LAFA0G05864g,LAFA0F20868g	LACI0E07294g,LACI0F17238g	LAFE0G06150g,LAFE0E12024g	LADA0E05886g,LADA0E09912g	LANO0G05776g,LANO0H07690g	LAMI0G14664g,LAMI0C08284g	SAKL0C07194g,SAKL0E08822g	YKR042W,YJL116C,YIL123W,YNL066W	UTH1,NCA3,SIM1,SUN4	Protein involved in cell wall biogenesis | Protein involved in mitochondrion organization | Protein of the SUN family (Sim1p, Uth1p, Nca3p, Sun4p) that may participate in DNA replication, promoter contains SCB regulation box at -300 bp indicating that expression may be cell cycle-regulated | Cell wall protein related to glucanases, possibly involved in cell wall septation	mitochondrial envelope (x3) | cytoplasm (x1) | unknown (x2) | membrane (x1) | mitochondrion (x1) | cell wall (x2)	hydrolase activity, acting on glycosyl bonds (x1) | unknown (x3)	cell wall organization or biogenesis (x2) | chromatin organization (x1) | mitochondrion organization (x2)	-	0	0	0	0	0	0	0	0	0	0	-	-	-	-	-	-	-	-	-	-
96	1	3	1	1	2	1	2	2	2	2	2	LAWA0D00122g	KLTH0E07920g,KLTH0E07898g,KLTH0G01584g	LAME0F01640g	LAFA0D10528g	LACI0F08768g,LACI0F08790g	LAFE0D03048g	LADA0H20076g,LADA0G04896g	LANO0F07272g,LANO0B00276g	LAMI0D06172g,LAMI0H09736g	SAKL0C00396g,SAKL0H22044g	YHR179W,YPL171C	OYE2,OYE3	Conserved NADPH oxidoreductase containing flavin mononucleotide (FMN) | Conserved NADPH oxidoreductase containing flavin mononucleotide (FMN), homologous to Oye2p with different ligand binding and catalytic properties	mitochondrion (x1) | cytoplasm (x1) | unknown (x1) | nucleus (x1)	oxidoreductase activity (x2)	other (x2)	-	0	0	0	0	0	0	0	4	0	1	-	-	-	-	-	-	-	LANO0E00100g,LANO0D11320g,LANO0H25422g,LANO0F05270g	-	SAKL0H00198pg
97	2	2	2	2	2	2	2	2	2	2	4	LAWA0E00760g,LAWA0A09670g	KLTH0D00858g,KLTH0H03564g	LAME0B00694g,LAME0B04808g	LAFA0C10220g,LAFA0G21220g	LACI0G18558g,LACI0G21968g	LAFE0D12530g,LAFE0C03994g	LADA0A08724g,LADA0G01662g	LANO0C00804g,LANO0E03532g	LAMI0F05138g,LAMI0G09758g	SAKL0D14586g,SAKL0A03828g	YAL053W,YOR365C,YGL139W,YPL221W	FLC2,Unknown name,FLC3,FLC1	Putative FAD transporter | Putative protein of unknown function | Putative FAD transporter, similar to Flc1p and Flc2p | Putative FAD transporter	site of polarized growth (x1) | cytoplasm (x3) | endoplasmic reticulum (x3) | vacuole (x4) | membrane (x1) | mitochondrion (x1) | cellular bud (x1)	unknown (x1) | transmembrane transporter activity (x3)	nucleobase-containing compound transport (x1) | protein folding (x2) | ion transport (x3) | unknown (x3) | cell wall organization or biogenesis (x2) | transmembrane transport (x2)	-	0	0	0	0	0	0	0	0	0	0	-	-	-	-	-	-	-	-	-	-
98	3	2	1	2	1	3	3	2	1	3	2	LAWA0F15610g,LAWA0E12156g,LAWA0D04742g	KLTH0E07964g,KLTH0B04972g	LAME0F01706g	LAFA0B00188g,LAFA0D10484g	LACI0F08834g	LAFE0D03004g,LAFE0B01970g,LAFE0E04038g	LADA0B11056g,LADA0A09164g,LADA0G04940g	LANO0E16798g,LANO0F07206g	LAMI0D06128g	SAKL0C00264g,SAKL0H22088g,SAKL0D14938g	YMR318C,YCR105W	ADH6,ADH7	NADPH-dependent medium chain alcohol dehydrogenase | NADPH-dependent medium chain alcohol dehydrogenase with broad substrate specificity	unknown (x2)	oxidoreductase activity (x2)	other (x2)	-	0	0	0	0	0	0	0	0	0	0	-	-	-	-	-	-	-	-	-	-
99	2	2	2	2	2	2	2	2	2	2	3	LAWA0E08878g,LAWA0B06260g	KLTH0D09174g,KLTH0F13002g	LAME0H12926g,LAME0F08196g	LAFA0C06414g,LAFA0D08636g	LACI0H19746g,LACI0G09274g	LAFE0F06458g,LAFE0G11100g	LADA0C08856g,LADA0E13190g	LANO0H13696g,LANO0H19394g	LAMI0D00606g,LAMI0E05644g	SAKL0E10494g,SAKL0F04862g	YNL106C,YOR109W,YIL002C	INP52,INP53,INP51	Polyphosphatidylinositol phosphatase | Polyphosphatidylinositol phosphatase | Phosphatidylinositol 4,5-bisphosphate 5-phosphatase, synaptojanin-like protein with an N-terminal Sac1 domain, plays a role in phosphatidylinositol 4,5-bisphosphate homeostasis and in endocytosis	cytoplasm (x2) | cytoskeleton (x3) | site of polarized growth (x2) | cell cortex (x2) | membrane (x1)	phosphatase activity (x3)	lipid metabolic process (x3)	-	0	0	0	0	0	0	0	0	0	0	-	-	-	-	-	-	-	-	-	-
100	2	2	2	2	2	2	2	2	2	2	3	LAWA0A01024g,LAWA0A02322g	KLTH0C11044g,KLTH0C09504g	LAME0D10462g,LAME0F06414g	LAFA0F03510g,LAFA0F02102g	LACI0E02630g,LACI0E01090g	LAFE0E01024g,LAFE0E02410g	LADA0B08658g,LADA0B10220g	LANO0A06546g,LANO0A05094g	LAMI0B07734g,LAMI0G01310g	SAKL0C09218g,SAKL0E01474g	YDR492W,YOL002C,YOL101C	IZH1,IZH2,IZH4	Membrane protein involved in zinc ion homeostasis | Plasma membrane protein involved in zinc homeostasis and osmotin-induced apoptosis | Membrane protein involved in zinc ion homeostasis	cytoplasm (x2) | nucleus (x1) | plasma membrane (x3) | endoplasmic reticulum (x1) | membrane (x1)	ion binding (x3)	response to chemical stimulus (x3) | cellular ion homeostasis (x3) | lipid metabolic process (x2)	-	0	0	0	0	0	0	0	0	0	0	-	-	-	-	-	-	-	-	-	-
101	2	2	2	2	2	2	2	2	2	2	3	LAWA0E05952g,LAWA0G11804g	KLTH0D06006g,KLTH0A01320g	LAME0G16160g,LAME0F19482g	LAFA0F08878g,LAFA0C01112g	LACI0H16864g,LACI0D11826g	LAFE0H13630g,LAFE0H16842g	LADA0G11056g,LADA0E00518g	LANO0D06150g,LANO0H01002g	LAMI0G03862g,LAMI0E04588g	SAKL0E02332g,SAKL0C12386g	YHL007C,YOL113W,YNL298W	STE20,SKM1,CLA4	Cdc42p-activated signal transducing kinase of the PAK (p21-activated kinase) family | Member of the PAK family of serine/threonine protein kinases | Cdc42p-activated signal transducing kinase	site of polarized growth (x1) | cytoplasm (x1) | vacuole (x2) | nucleus (x3) | membrane (x2) | cellular bud (x1) | plasma membrane (x1)	kinase activity (x3) | signal transducer activity (x1)	mitotic cell cycle (x1) | transmembrane transport (x1) | vacuole organization (x3) | cell budding (x1) | protein phosphorylation (x1) | organelle inheritance (x3) | response to chemical stimulus (x2) | conjugation (x2) | regulation of protein modification process (x2) | response to osmotic stress (x3) | response to heat (x1) | regulation of cell cycle (x2) | invasive growth in response to glucose…	-	0	0	0	0	0	0	0	0	0	0	-	-	-	-	-	-	-	-	-	-
102	2	2	2	2	2	2	2	2	2	2	3	LAWA0D04984g,LAWA0B09450g	KLTH0E08206g,KLTH0F16368g	LAME0H04918g,LAME0D02652g	LAFA0E07712g,LAFA0D14862g	LACI0F09054g,LACI0H23134g	LAFE0D02806g,LAFE0F02982g	LADA0C05006g,LADA0B03114g	LANO0F06986g,LANO0H22584g	LAMI0D05952g,LAMI0E13520g	SAKL0G02156g,SAKL0H22440g	YGL002W,YHR110W,YAR002C-A	ERP6,ERP5,ERP1	Member of the p24 family involved in ER to Golgi transport | Protein with similarity to Emp24p and Erv25p, member of the p24 family involved in ER to Golgi transport | Member of the p24 family involved in ER to Golgi transport	mitochondrion (x2) | cytoplasm (x1) | cytoplasmic membrane-bounded vesicle (x2) | membrane (x2)	unknown (x3)	other (x2) | Golgi vesicle transport (x1)	-	0	0	0	0	0	0	0	0	0	0	-	-	-	-	-	-	-	-	-	-
103	2	2	2	2	2	2	3	2	2	2	2	LAWA0H08768g,LAWA0G06678g	KLTH0H10406g,KLTH0D14630g	LAME0H04258g,LAME0E07690g	LAFA0E15874g,LAFA0G12002g	LACI0D10022g,LACI0G03774g	LAFE0F08020g,LAFE0E08064g	LADA0H12816g,LADA0H13432g,LADA0G06920g	LANO0F06282g,LANO0G12068g	LAMI0H11408g,LAMI0A02190g	SAKL0D06622g,SAKL0H02706g	YLR398C,YJL050W	SKI2,MTR4	Ski complex component and putative RNA helicase, mediates 3'-5' RNA degradation by the cytoplasmic exosome | ATP-dependent 3'-5' RNA helicase of the DExD/H family	cytoplasm (x1) | nucleolus (x1) | nucleus (x1)	RNA binding (x1) | helicase activity (x1) | ATPase activity (x2) | mRNA binding (x1)	rRNA processing (x2) | snoRNA processing (x1) | RNA catabolic process (x1)	-	0	0	0	0	0	0	0	0	0	0	-	-	-	-	-	-	-	-	-	-
104	2	2	2	2	2	2	2	2	2	2	3	LAWA0B08394g,LAWA0C08086g	KLTH0F15180g,KLTH0B06512g	LAME0F10264g,LAME0F17194g	LAFA0D06436g,LAFA0F10836g	LACI0H22078g,LACI0H07558g	LAFE0F04104g,LAFE0H04060g	LADA0B04104g,LADA0E02696g	LANO0H21572g,LANO0H03312g	LAMI0E14510g,LAMI0B00562g	SAKL0G03388g,SAKL0E12430g	YOR133W,YDR385W,YNL163C	EFT1,EFT2,RIA1	Elongation factor 2 (EF-2), also encoded by EFT2 | Elongation factor 2 (EF-2), also encoded by EFT1 | Cytoplasmic GTPase/eEF2-like factor involved in ribosomal biogenesis	cytoplasm (x3) | ribosome (x2)	RNA binding (x1) | GTPase activity (x2) | translation factor activity, nucleic acid binding (x2)	translational elongation (x1) | organelle assembly (x1) | ribosome assembly (x1) | regulation of translation (x2)	-	0	0	0	0	0	0	0	0	0	0	-	-	-	-	-	-	-	-	-	-
105	2	2	2	2	2	2	2	3	2	2	2	LAWA0F06722g,LAWA0F09670g	KLTH0G16500g,KLTH0E10186g	LAME0B03202g,LAME0D08812g	LAFA0C07690g,LAFA0F17920g	LACI0B03444g,LACI0H08812g	LAFE0C09406g,LAFE0H05314g	LADA0F06172g,LADA0D06964g	LANO0C03532g,LANO0E11188g,LANO0G10704g	LAMI0C07558g,LAMI0B05512g	SAKL0C11242g,SAKL0H12694g	YDR224C,YBL002W	HTB1,HTB2	Histone H2B, core histone protein required for chromatin assembly and chromosome function | Histone H2B, core histone protein required for chromatin assembly and chromosome function	nucleus (x2) | chromosome (x2)	DNA binding (x2)	DNA repair (x1) | chromatin organization (x2) | response to DNA damage stimulus (x1) | transcription from RNA polymerase II promoter (x1)	-	0	0	0	0	0	0	0	0	0	0	-	-	-	-	-	-	-	-	-	-
106	2	2	2	2	2	2	2	2	2	2	3	LAWA0G15896g,LAWA0C03598g	KLTH0A05962g,KLTH0F03652g	LAME0H14510g,LAME0G03378g	LAFA0F14268g,LAFA0G03466g	LACI0G23530g,LACI0E09846g	LAFE0C02322g,LAFE0G03510g	LADA0B05886g,LADA0H03532g	LANO0A02278g,LANO0G03356g	LAMI0C01706g,LAMI0G07624g	SAKL0C04224g,SAKL0A02134g	YNR013C,YCR037C,YJL198W	PHO91,PHO87,PHO90	Low-affinity phosphate transporter of the vacuolar membrane | Low-affinity inorganic phosphate (Pi) transporter | Low-affinity phosphate transporter	vacuole (x1) | cytoplasm (x3) | membrane (x1)	transmembrane transporter activity (x3)	ion transport (x3) | transmembrane transport (x1)	-	0	0	0	0	0	0	0	0	0	0	-	-	-	-	-	-	-	-	-	-
107	2	2	2	2	2	2	2	2	2	2	3	LAWA0H10858g,LAWA0A04148g	KLTH0H12584g,KLTH0C07590g	LAME0E10374g,LAME0H13520g	LAFA0G14686g,LAFA0F05182g	LACI0C01838g,LACI0E04390g	LAFE0F10286g,LAFE0E04214g	LADA0H16270g,LADA0B07008g	LANO0G14730g,LANO0A03356g	LAMI0A06062g,LAMI0C05754g	SAKL0D09130g,SAKL0D03696g	YCR004C,YDR032C,YBR052C	YCP4,PST2,RFS1	Protein of unknown function, has sequence and structural similarity to flavodoxins | Protein with similarity to a family of flavodoxin-like proteins | Protein of unknown function	mitochondrion (x3) | cytoplasm (x3) | plasma membrane (x2) | membrane (x2)	unknown (x2) | other (x1)	unknown (x3)	-	0	0	0	0	0	0	0	0	0	0	-	-	-	-	-	-	-	-	-	-
108	2	2	2	2	2	2	2	2	2	2	3	LAWA0H08284g,LAWA0H08306g	KLTH0H09812g,KLTH0H09834g	LAME0H03796g,LAME0H03818g	LAFA0E16402g,LAFA0E16380g	LACI0D07910g,LACI0H16490g	LAFE0C12090g,LAFE0H13278g	LADA0H12200g,LADA0H12222g	LANO0F05798g,LANO0F05820g	LAMI0H14488g,LAMI0H14510g	SAKL0D05984g,SAKL0D06006g	YJL078C,YJL079C,YKR013W	PRY3,PRY1,PRY2	Cell wall-associated protein involved in export of acetylated sterols | Sterol binding protein involved in the export of acetylated sterols | Sterol binding protein involved in the export of acetylated sterols	extracellular region (x1) | cytoplasm (x2) | endoplasmic reticulum (x1) | endomembrane system (x1) | vacuole (x2) | nucleus (x1) | cell wall (x2)	unknown (x2) | lipid binding (x1)	lipid transport (x3)	-	0	0	0	0	0	0	0	0	0	0	-	-	-	-	-	-	-	-	-	-
109	2	2	2	2	2	2	2	2	2	2	3	LAWA0H10286g,LAWA0G06810g	KLTH0H12012g,KLTH0D14476g	LAME0E09780g,LAME0E07822g	LAFA0G14092g,LAFA0G12134g	LACI0D08504g,LACI0G03906g	LAFE0F09604g,LAFE0E07932g	LADA0H15632g,LADA0H13564g	LANO0G14136g,LANO0G12200g	LAMI0A05490g,LAMI0A02344g	SAKL0D08426g,SAKL0H02860g	YLR174W,YNL009W,YDL066W	IDP2,IDP3,IDP1	Cytosolic NADP-specific isocitrate dehydrogenase | Peroxisomal NADP-dependent isocitrate dehydrogenase | Mitochondrial NADP-specific isocitrate dehydrogenase, catalyzes the oxidation of isocitrate to alpha-ketoglutarate	mitochondrion (x3) | cytoplasm (x2) | peroxisome (x1)	oxidoreductase activity (x3)	nucleobase-containing small molecule metabolic process (x2) | cellular amino acid metabolic process (x1) | cofactor metabolic process (x1) | lipid metabolic process (x1)	-	0	0	0	0	0	0	0	0	0	0	-	-	-	-	-	-	-	-	-	-
110	2	2	2	2	2	2	2	2	2	3	2	LAWA0A04346g,LAWA0H04126g	KLTH0C07370g,KLTH0H05346g	LAME0H13674g,LAME0C08372g	LAFA0F05336g,LAFA0C03070g	LACI0E04588g,LACI0G20252g	LAFE0E04434g,LAFE0C05754g	LADA0B06854g,LADA0H04368g	LANO0A03202g,LANO0F01376g	LAMI0C05578g,LAMI0F07668g	SAKL0D03366g,SAKL0A05720g,SAKL0F00902g	YDR035W,YBR249C	ARO3,ARO4	3-deoxy-D-arabino-heptulosonate-7-phosphate (DAHP) synthase, catalyzes the first step in aromatic amino acid biosynthesis and is feedback-inhibited by phenylalanine or high concentration of tyrosine or tryptophan | 3-deoxy-D-arabino-heptulosonate-7-phosphate (DAHP) synthase	mitochondrion (x2) | cytoplasm (x1) | nucleus (x2)	transferase activity, transferring alkyl or aryl (other than methyl) groups (x2)	other (x2)	-	0	0	0	0	0	0	0	0	0	0	-	-	-	-	-	-	-	-	-	-
111	2	2	2	2	2	2	2	2	2	2	3	LAWA0F05842g,LAWA0E07118g	KLTH0C06710g,KLTH0D07172g	LAME0F11012g,LAME0G15038g	LAFA0D05688g,LAFA0F07756g	LACI0H01376g,LACI0H17964g	LAFE0B01508g,LAFE0H14730g	LADA0H08922g,LADA0G12200g	LANO0F11342g,LANO0D04830g	LAMI0D12706g,LAMI0F10440g	SAKL0F12452g,SAKL0A09768g	YBL068W,YER099C,YHL011C	PRS4,PRS2,PRS3	5-phospho-ribosyl-1(alpha)-pyrophosphate synthetase, synthesizes PRPP, which is required for nucleotide, histidine, and tryptophan biosynthesis | 5-phospho-ribosyl-1(alpha)-pyrophosphate synthetase, synthesizes PRPP, which is required for nucleotide, histidine, and tryptophan biosynthesis | 5-phospho-ribosyl-1(alpha)-pyrophosphate synthetase, synthesizes PRPP, which is required for nucleotide, hi…	cytoplasm (x3)	other (x3)	cell wall organization or biogenesis (x3)	-	0	0	0	0	0	0	0	0	0	0	-	-	-	-	-	-	-	-	-	-
112	2	2	2	2	2	3	2	2	2	2	2	LAWA0D03136g,LAWA0F10990g	KLTH0F12210g,KLTH0E11550g	LAME0F07602g,LAME0H08790g	LAFA0D09208g,LAFA0E11496g	LACI0F13894g,LACI0G11078g	LAFE0A03092g,LAFE0G12948g,LAFE0F18184g	LADA0E12618g,LADA0D05666g	LANO0H18800g,LANO0E09934g	LAMI0E01618g,LAMI0A01354g	SAKL0F05742g,SAKL0H11198g	YGR088W,YDR256C	CTT1,CTA1	Cytosolic catalase T, has a role in protection from oxidative damage by hydrogen peroxide | Catalase A, breaks down hydrogen peroxide in the peroxisomal matrix formed by acyl-CoA oxidase (Pox1p) during fatty acid beta-oxidation	mitochondrion (x2) | cytoplasm (x1) | peroxisome (x1)	oxidoreductase activity (x2)	response to chemical stimulus (x2) | response to oxidative stress (x2)	-	0	0	0	0	0	0	0	0	0	0	-	-	-	-	-	-	-	-	-	-
113	3	3	3	3	1	2	1	3	2	1	1	LAWA0G07712g,LAWA0B12904g,LAWA0A12904g	KLTH0B08470g,KLTH0F19866g,KLTH0H00286g	LAME0G07030g,LAME0C09428g,LAME0B08042g	LAFA0E03928g,LAFA0F12200g,LAFA0G24454g	LACI0H05732g	LAFE0H00320g,LAFE0H02234g	LADA0F01640g	LANO0C08108g,LANO0F00298g,LANO0E00298g	LAMI0F14994g,LAMI0C06788g	SAKL0E14366g	YNL234W	Unknown name	Protein of unknown function with similarity to globins	cytoplasm (x1)	other (x1)	unknown (x1)	-	0	0	0	0	0	0	0	0	0	0	-	-	-	-	-	-	-	-	-	-
114	2	2	2	2	2	2	2	2	2	2	3	LAWA0C08262g,LAWA0B07624g	KLTH0B06336g,KLTH0F14410g	LAME0F17370g,LAME0F09582g	LAFA0F11012g,LAFA0D07140g	LACI0H07712g,LACI0H21352g	LAFE0H04214g,LAFE0F04830g	LADA0E02520g,LADA0B04896g	LANO0H03136g,LANO0H20846g	LAMI0B00738g,LAMI0H04500g	SAKL0E12254g,SAKL0F03278g	YNL142W,YPR138C,YGR121C	MEP2,MEP3,MEP1	Ammonium permease involved in regulation of pseudohyphal growth | Ammonium permease of high capacity and low affinity | Ammonium permease	plasma membrane (x3) | membrane (x3)	transmembrane transporter activity (x3)	ion transport (x3) | pseudohyphal growth (x1)	-	0	0	0	0	0	0	0	0	0	0	-	-	-	-	-	-	-	-	-	-
115	2	2	2	2	2	2	2	2	2	2	2	LAWA0A00386g,LAWA0C02036g	KLTH0C11616g,KLTH0F02024g	LAME0G01860g,LAME0D11100g	LAFA0G01948g,LAFA0B07976g	LACI0E11452g,LACI0E00958g	LAFE0E00892g,LAFE0G01926g	LADA0H01926g,LADA0B10770g	LANO0G01860g,LANO0A07118g	LAMI0B08350g,LAMI0F01794g	SAKL0E00748g,SAKL0C02244g	YPL270W,YLR188W	MDL2,MDL1	Mitochondrial inner membrane half-type ATP-binding cassette (ABC) transporter, required for respiratory growth at high temperature | Mitochondrial inner membrane half-type ATP-binding cassette (ABC) transporter, mediates export of peptides generated upon proteolysis of mitochondrial proteins, plays a role in the regulation of cellular resistance to oxidative stress	mitochondrion (x2) | cytoplasm (x2) | mitochondrial envelope (x2) | membrane (x2)	transmembrane transporter activity (x2) | ATPase activity (x2)	transmembrane transport (x2)	-	0	0	0	0	0	0	0	0	0	0	-	-	-	-	-	-	-	-	-	-
116	2	2	2	2	2	2	2	2	2	2	2	LAWA0E01530g,LAWA0C12024g	KLTH0D01584g,KLTH0B02530g	LAME0B01420g,LAME0C02256g	LAFA0C09494g,LAFA0B01926g	LACI0G17788g,LACI0F18602g	LAFE0D11716g,LAFE0E13344g	LADA0F07910g,LADA0D10902g	LANO0C01552g,LANO0E15126g	LAMI0F05886g,LAMI0F09340g	SAKL0B10780g,SAKL0G13530g	YAL036C,YGR173W	RBG1,RBG2	Member of the DRG family of GTP-binding proteins | Protein with a role in translation	cytoplasm (x2) | ribosome (x1)	ion binding (x2)	cytoplasmic translation (x2)	-	0	0	0	0	0	0	0	0	0	0	-	-	-	-	-	-	-	-	-	-
117	2	2	2	2	2	2	2	2	2	2	2	LAWA0C13014g,LAWA0F13718g	KLTH0B01496g,KLTH0E14366g	LAME0C01376g,LAME0F02586g	LAFA0B01090g,LAFA0F16842g	LACI0A01728g,LACI0G14004g	LAFE0A07514g,LAFE0G15940g	LADA0F09714g,LADA0D02476g	LANO0E16072g,LANO0E07052g	LAMI0A08086g,LAMI0E08944g	SAKL0G14542g,SAKL0B06600g	YGR204W,YBR084W	ADE3,MIS1	Cytoplasmic trifunctional enzyme C1-tetrahydrofolate synthase, involved in single carbon metabolism and required for biosynthesis of purines, thymidylate, methionine, and histidine | Mitochondrial C1-tetrahydrofolate synthase, involved in interconversion between different oxidation states of tetrahydrofolate (THF)	mitochondrion (x2) | cytoplasm (x1) | nucleus (x1)	hydrolase activity, acting on carbon-nitrogen (but not peptide) bonds (x2) | ligase activity (x2) | oxidoreductase activity (x2)	nucleobase-containing small molecule metabolic process (x2) | cellular amino acid metabolic process (x2) | cofactor metabolic process (x1) | vitamin metabolic process (x1)	-	0	0	0	0	0	0	0	0	0	0	-	-	-	-	-	-	-	-	-	-
118	2	2	2	2	2	2	2	2	2	2	2	LAWA0G07250g,LAWA0G00716g	KLTH0B08998g,KLTH0G07766g	LAME0H01266g,LAME0D07294g	LAFA0E01332g,LAFA0F19460g	LACI0F19284g,LACI0F11562g	LAFE0E13982g,LAFE0A05314g	LADA0B01750g,LADA0E08504g	LANO0C08570g,LANO0H09076g	LAMI0F15478g,LAMI0F12134g	SAKL0H01430g,SAKL0G11748g	YMR290C,YJL033W	HAS1,HCA4	ATP-dependent RNA helicase | DEAD box RNA helicase	nucleolus (x1) | nucleus (x2) | endomembrane system (x2)	RNA binding (x2) | helicase activity (x1) | ATPase activity (x2)	rRNA processing (x2)	-	0	0	0	0	0	0	0	0	0	0	-	-	-	-	-	-	-	-	-	-
119	2	2	2	2	2	2	2	2	2	2	2	LAWA0A04874g,LAWA0F03554g	KLTH0G15752g,KLTH0C04334g	LAME0G10792g,LAME0E01992g	LAFA0E15170g,LAFA0D03532g	LACI0E05732g,LACI0B04258g	LAFE0C08636g,LAFE0G07756g	LADA0H05776g,LADA0F05446g	LANO0C04280g,LANO0F13696g	LAMI0C06810g,LAMI0A05138g	SAKL0C10230g,SAKL0D02024g	YMR266W,YOL084W	RSN1,PHM7	Membrane protein of unknown function | Protein of unknown function	vacuole (x1) | cytoplasm (x2) | membrane (x1)	unknown (x2)	Golgi vesicle transport (x1) | unknown (x1)	-	0	0	0	0	0	0	0	0	0	0	-	-	-	-	-	-	-	-	-	-
120	2	2	2	2	2	2	2	2	2	2	2	LAWA0C11430g,LAWA0E06326g	KLTH0B03058g,KLTH0D06358g	LAME0C02762g,LAME0G15808g	LAFA0B02432g,LAFA0F08526g	LACI0A03136g,LACI0H17216g	LAFE0A06018g,LAFE0H13982g	LADA0D10462g,LADA0G11408g	LANO0E14664g,LANO0D05600g	LAMI0H09142g,LAMI0F11232g	SAKL0G12540g,SAKL0A08888g	YLL001W,YKR001C	DNM1,VPS1	Dynamin-related GTPase required for mitochondrial fission and morphology | Dynamin-like GTPase required for vacuolar sorting	mitochondrial envelope (x1) | cytoplasm (x2) | peroxisome (x1) | cell cortex (x2) | vacuole (x2) | membrane (x2) | mitochondrion (x2) | cytoskeleton (x1)	GTPase activity (x2)	organelle fission (x1) | organelle inheritance (x1) | endocytosis (x1) | protein targeting (x2) | protein complex biogenesis (x1) | peroxisome organization (x2) | cytoskeleton organization (x1) | mitochondrion organization (x1)	-	0	0	0	0	0	0	0	0	0	0	-	-	-	-	-	-	-	-	-	-
121	2	2	2	2	2	2	2	2	2	2	2	LAWA0D07470g,LAWA0B10550g	KLTH0A03542g,KLTH0F17490g	LAME0A02476g,LAME0D01530g	LAFA0D15940g,LAFA0A05886g	LACI0D01772g,LACI0H24234g	LAFE0B05820g,LAFE0F01882g	LADA0A05864g,LADA0A01596g	LANO0B03224g,LANO0H23706g	LAMI0G12728g,LAMI0H09648g	SAKL0G00990g,SAKL0F07854g	YIL035C,YOR061W	CKA1,CKA2	Alpha catalytic subunit of casein kinase 2 (CK2), a Ser/Thr protein kinase with roles in cell growth and proliferation | Alpha' catalytic subunit of casein kinase 2 (CK2)	nucleolus (x2) | nucleus (x2)	kinase activity (x2)	transcription from RNA polymerase III promoter (x2) | transcription from RNA polymerase I promoter (x2) | response to DNA damage stimulus (x2) | protein phosphorylation (x2)	-	0	0	0	0	0	0	0	0	0	0	-	-	-	-	-	-	-	-	-	-
122	2	2	2	2	2	2	2	2	2	2	2	LAWA0H01552g,LAWA0B11848g	KLTH0C01188g,KLTH0F18854g	LAME0E00980g,LAME0F15192g	LAFA0F21572g,LAFA0G19504g	LACI0C00848g,LACI0F01530g	LAFE0C13058g,LAFE0G17986g	LADA0H19834g,LADA0H10594g	LANO0F16732g,LANO0E05182g	LAMI0G01860g,LAMI0G07228g	SAKL0G19140g,SAKL0C12760g	YKL085W,YOL126C	MDH1,MDH2	Mitochondrial malate dehydrogenase, catalyzes interconversion of malate and oxaloacetate | Cytoplasmic malate dehydrogenase, one of three isozymes that catalyze interconversion of malate and oxaloacetate	mitochondrion (x2) | cytoplasm (x1)	RNA binding (x1) | oxidoreductase activity (x1) | mRNA binding (x2)	cellular respiration (x1) | carbohydrate metabolic process (x1) | protein targeting (x1) | generation of precursor metabolites and energy (x1) | peroxisome organization (x1) | transmembrane transport (x1)	-	0	0	0	0	0	0	0	0	0	0	-	-	-	-	-	-	-	-	-	-
123	2	2	2	2	2	2	2	2	2	2	2	LAWA0F06524g,LAWA0F03532g	KLTH0G16302g,KLTH0C04312g	LAME0B03400g,LAME0E01970g	LAFA0C07492g,LAFA0D03510g	LACI0B03664g,LACI0E05754g	LAFE0C09186g,LAFE0G07734g	LADA0F05974g,LADA0H05754g	LANO0C03730g,LANO0F13718g	LAMI0C07360g,LAMI0A05116g	SAKL0C10560g,SAKL0D02002g	YBR011C,YMR267W	IPP1,PPA2	Cytoplasmic inorganic pyrophosphatase (PPase), homodimer that catalyzes the rapid exchange of oxygens from Pi with water, highly expressed and essential for viability, active-site residues show identity to those from E. coli PPase | Mitochondrial inorganic pyrophosphatase, required for mitochondrial function and possibly involved in energy generation from inorganic pyrophosphate	mitochondrion (x2) | cytoplasm (x1)	other (x2)	generation of precursor metabolites and energy (x1) | other (x1) | cellular respiration (x1)	-	0	0	0	0	0	0	0	0	0	0	-	-	-	-	-	-	-	-	-	-
124	2	2	2	2	2	2	2	2	2	2	2	LAWA0F09054g,LAWA0F06458g	KLTH0G16258g,KLTH0G10670g	LAME0G12420g,LAME0B03444g	LAFA0E20450g,LAFA0C07448g	LACI0B03730g,LACI0F15896g	LAFE0E10660g,LAFE0C09120g	LADA0F05930g,LADA0E11276g	LANO0H06260g,LANO0C03774g	LAMI0E03642g,LAMI0C07294g	SAKL0E07326g,SAKL0C10692g	YNL031C,YBR010W	HHT2,HHT1	Histone H3, core histone protein required for chromatin assembly, part of heterochromatin-mediated telomeric and HM silencing | Histone H3, core histone protein required for chromatin assembly, part of heterochromatin-mediated telomeric and HM silencing	nucleus (x2) | chromosome (x2)	DNA binding (x2)	mitotic cell cycle (x2) | sporulation (x2) | organelle fission (x2) | regulation of organelle organization (x2) | chromatin organization (x2) | regulation of cell cycle (x2) | response to DNA damage stimulus (x2) | DNA repair (x2)	-	0	0	0	0	0	0	0	0	0	0	-	-	-	-	-	-	-	-	-	-
125	2	2	2	2	2	2	2	2	2	2	2	LAWA0F09032g,LAWA0F06436g	KLTH0G16236g,KLTH0G10692g	LAME0G12398g,LAME0B03466g	LAFA0E20428g,LAFA0C07426g	LACI0B03752g,LACI0F15874g	LAFE0E10638g,LAFE0C09098g	LADA0F05908g,LADA0E11298g	LANO0H06238g,LANO0C03818g	LAMI0E03620g,LAMI0C07272g	SAKL0E07304g,SAKL0C10714g	YNL030W,YBR009C	HHF2,HHF1	Histone H4, core histone protein required for chromatin assembly and chromosome function | Histone H4, core histone protein required for chromatin assembly and chromosome function	nucleus (x2) | chromosome (x2)	DNA binding (x2)	histone modification (x2) | protein alkylation (x2) | chromatin organization (x2) | sporulation (x2)	-	0	0	0	0	0	0	0	0	0	0	-	-	-	-	-	-	-	-	-	-
126	2	2	2	2	2	2	2	2	2	2	2	LAWA0A04588g,LAWA0C03862g	KLTH0G16038g,KLTH0F03938g	LAME0G11056g,LAME0G03664g	LAFA0E14906g,LAFA0G03752g	LACI0B03994g,LACI0E09538g	LAFE0C08900g,LAFE0G03840g	LADA0F05710g,LADA0H03818g	LANO0C04016g,LANO0G03642g	LAMI0C07074g,LAMI0G07910g	SAKL0C10472g,SAKL0C04598g	YBR015C,YJL186W	MNN2,MNN5	Alpha-1,2-mannosyltransferase, responsible for addition of the first alpha-1,2-linked mannose to form the branches on the mannan backbone of oligosaccharides, localizes to an early Golgi compartment | Alpha-1,2-mannosyltransferase, responsible for addition of the second alpha-1,2-linked mannose of the branches on the mannan backbone of oligosaccharides, localizes to an early Golgi compartment	cytoplasm (x2) | Golgi apparatus (x2)	transferase activity, transferring glycosyl groups (x2)	protein glycosylation (x2) | carbohydrate metabolic process (x2)	-	0	0	0	0	0	0	0	0	0	0	-	-	-	-	-	-	-	-	-	-
127	2	2	2	2	2	2	2	2	2	2	2	LAWA0C05600g,LAWA0B01266g	KLTH0F05874g,KLTH0E01452g	LAME0G05314g,LAME0F03554g	LAFA0G05424g,LAFA0E19306g	LACI0E07756g,LACI0F02388g	LAFE0G05688g,LAFE0G17172g	LADA0E05446g,LADA0D01508g	LANO0G05336g,LANO0E06084g	LAMI0G14202g,LAMI0G15544g	SAKL0C06600g,SAKL0F14652g	YJL130C,YJR109C	URA2,CPA2	Bifunctional carbamoylphosphate synthetase (CPSase)-aspartate transcarbamylase (ATCase), catalyzes the first two enzymatic steps in the de novo biosynthesis of pyrimidines | Large subunit of carbamoyl phosphate synthetase, which catalyzes a step in the synthesis of citrulline, an arginine precursor	mitochondrion (x2) | cytoplasm (x1) | membrane (x1)	ligase activity (x2)	nucleobase-containing small molecule metabolic process (x2) | cellular amino acid metabolic process (x1)	-	0	0	0	0	0	0	0	0	0	0	-	-	-	-	-	-	-	-	-	-
128	2	2	2	2	2	2	2	2	2	2	2	LAWA0G11012g,LAWA0E02960g	KLTH0A02288g,KLTH0D02992g	LAME0A03664g,LAME0A05996g	LAFA0A04390g,LAFA0A02388g	LACI0D02938g,LACI0G16446g	LAFE0B07030g,LAFE0D10352g	LADA0A06986g,LADA0C10220g	LANO0B02080g,LANO0D08922g	LAMI0F12838g,LAMI0F07228g	SAKL0B02750g,SAKL0B09328g	YPL004C,YGR086C	LSP1,PIL1	Primary component of eisosomes, which are large immobile patch structures at the cell cortex associated with endocytosis, along with Pil1p and Sur7p | Primary protein component of eisosomes	mitochondrion (x2) | cytoplasm (x2) | mitochondrial envelope (x2) | plasma membrane (x2) | membrane (x2)	lipid binding (x2)	response to heat (x2) | protein phosphorylation (x2) | regulation of protein modification process (x2) | endocytosis (x2)	-	0	0	0	0	0	0	0	0	0	0	-	-	-	-	-	-	-	-	-	-
129	1	1	2	2	2	3	2	2	2	2	2	LAWA0B09956g	KLTH0F16874g	LAME0D02124g,LAME0C05226g	LAFA0D15368g,LAFA0E17590g	LACI0H23640g,LACI0H15280g	LAFE0F02476g,LAFE0H11980g,LAFE0C00166g	LADA0A02234g,LADA0F08966g	LANO0H23090g,LANO0F04544g	LAMI0E12948g,LAMI0H13212g	SAKL0G01650g,SAKL0H20108g	YDR270W,YBR295W	CCC2,PCA1	Cu(+2)-transporting P-type ATPase | Cadmium transporting P-type ATPase	Golgi apparatus (x1) | cytoplasm (x1) | endomembrane system (x1) | cytoplasmic membrane-bounded vesicle (x1) | membrane (x2) | plasma membrane (x1)	transmembrane transporter activity (x2) | ion binding (x2) | ATPase activity (x2)	ion transport (x2) | cellular ion homeostasis (x2) | transmembrane transport (x2)	-	0	0	0	0	0	0	1	0	0	0	-	-	-	-	-	-	LADA0B00144g	-	-	-
130	2	2	2	2	2	2	2	2	2	2	2	LAWA0H03884g,LAWA0E14664g	KLTH0G17204g,KLTH0B09878g	LAME0B02652g,LAME0H00364g	LAFA0C08240g,LAFA0E00386g	LACI0D03598g,LACI0F20164g	LAFE0B07690g,LAFE0E14906g	LADA0F06722g,LADA0E14818g	LANO0C02916g,LANO0C09538g	LAMI0B03356g,LAMI0F16402g	SAKL0B03586g,SAKL0H00484g	YGR279C,YMR305C	SCW4,SCW10	Cell wall protein with similarity to glucanases | Cell wall protein with similarity to glucanases	extracellular region (x2) | cell wall (x1) | endoplasmic reticulum (x1) | cytoplasm (x2)	hydrolase activity, acting on glycosyl bonds (x2)	conjugation (x2)	-	0	0	0	0	0	0	0	0	0	0	-	-	-	-	-	-	-	-	-	-
131	2	2	2	2	2	2	2	2	2	2	2	LAWA0H02652g,LAWA0H08614g	KLTH0G18502g,KLTH0H10252g	LAME0A07118g,LAME0H04104g	LAFA0A01178g,LAFA0E16028g	LACI0D04698g,LACI0D10176g	LAFE0B08900g,LAFE0F07866g	LADA0C11342g,LADA0H12662g	LANO0D10132g,LANO0F06128g	LAMI0G16798g,LAMI0H11562g	SAKL0B01320g,SAKL0D06468g	YLR058C,YBR263W	SHM2,SHM1	Cytosolic serine hydroxymethyltransferase, converts serine to glycine plus 5,10 methylenetetrahydrofolate | Mitochondrial serine hydroxymethyltransferase, converts serine to glycine plus 5,10 methylenetetrahydrofolate	mitochondrion (x2) | cytoplasm (x1) | site of polarized growth (x1) | plasma membrane (x1) | membrane (x1)	other (x2)	cellular amino acid metabolic process (x1) | other (x1)	-	0	0	0	0	0	0	0	0	0	0	-	-	-	-	-	-	-	-	-	-
132	2	2	2	2	2	2	2	2	2	2	2	LAWA0F01706g,LAWA0F01662g	KLTH0C02618g,KLTH0C02574g	LAME0D04434g,LAME0D04390g	LAFA0E03400g,LAFA0E03356g	LACI0D07558g,LACI0D07602g	LAFE0C11716g,LAFE0C11760g	LADA0H18448g,LADA0H18492g	LANO0F15346g,LANO0F15390g	LAMI0G03268g,LAMI0G03224g	SAKL0D12672g,SAKL0D12716g	YKL201C,YJR061W	MNN4,Unknown name	Putative positive regulator of mannosylphosphate transferase Mnn6p | Putative protein of unknown function	unknown (x1) | membrane (x1)	unknown (x2)	protein glycosylation (x1) | carbohydrate metabolic process (x1) | unknown (x1)	-	0	0	0	0	0	0	0	0	0	0	-	-	-	-	-	-	-	-	-	-
133	2	2	2	2	2	2	2	2	2	2	2	LAWA0G11386g,LAWA0G08790g	KLTH0A01826g,KLTH0B07392g	LAME0A04104g,LAME0F16402g	LAFA0A04830g,LAFA0F14972g	LACI0D11430g,LACI0H06766g	LAFE0H16358g,LAFE0H03290g	LADA0A07404g,LADA0E06414g	LANO0B01706g,LANO0H04126g	LAMI0F13916g,LAMI0F13234g	SAKL0C11770g,SAKL0E13222g	YBR038W,YNL192W	CHS2,CHS1	Chitin synthase II | Chitin synthase I, requires activation from zymogenic form in order to catalyze the transfer of N-acetylglucosamine (GlcNAc) to chitin	site of polarized growth (x1) | cytoplasm (x1) | cytoplasmic membrane-bounded vesicle (x1) | membrane (x2) | cellular bud (x1) | plasma membrane (x1)	transferase activity, transferring glycosyl groups (x2)	cytokinesis (x2)	-	0	0	0	0	0	0	0	0	0	0	-	-	-	-	-	-	-	-	-	-
134	2	2	2	2	2	2	2	2	2	2	2	LAWA0F04104g,LAWA0F08240g	KLTH0C04906g,KLTH0G11528g	LAME0E02542g,LAME0G11650g	LAFA0D04038g,LAFA0E19658g	LACI0E05204g,LACI0H10902g	LAFE0E05028g,LAFE0H07404g	LADA0H06304g,LADA0G05930g	LANO0F13146g,LANO0H05402g	LAMI0G00738g,LAMI0H17502g	SAKL0D02640g,SAKL0H14872g	YNR067C,YLR144C	DSE4,ACF2	Daughter cell-specific secreted protein with similarity to glucanases, degrades cell wall from the daughter side causing daughter to separate from mother | Intracellular beta-1,3-endoglucanase	extracellular region (x1) | cell wall (x1) | other (x1)	hydrolase activity, acting on glycosyl bonds (x2)	cytoskeleton organization (x1) | cytokinesis (x1)	-	0	0	0	0	0	0	0	0	0	0	-	-	-	-	-	-	-	-	-	-
135	2	2	2	2	2	2	2	2	2	2	2	LAWA0C03554g,LAWA0E03686g	KLTH0F03586g,KLTH0D03630g	LAME0G03356g,LAME0A05380g	LAFA0G03444g,LAFA0A03026g	LACI0E09868g,LACI0F10418g	LAFE0G03488g,LAFE0D01486g	LADA0H03488g,LADA0C09626g	LANO0G03334g,LANO0D08306g	LAMI0G07602g,LAMI0G06106g	SAKL0C04180g,SAKL0H24046g	YJL200C,YLR304C	ACO2,ACO1	Putative mitochondrial aconitase isozyme | Aconitase, required for the tricarboxylic acid (TCA) cycle and also independently required for mitochondrial genome maintenance	mitochondrion (x2) | cytoplasm (x2)	DNA binding (x1) | lyase activity (x2)	mitochondrion organization (x1) | generation of precursor metabolites and energy (x1) | cellular respiration (x1) | unknown (x1)	-	0	0	0	0	0	0	0	0	0	0	-	-	-	-	-	-	-	-	-	-
136	2	2	2	2	2	2	2	2	2	2	2	LAWA0H02168g,LAWA0C10154g	KLTH0G18964g,KLTH0B04356g	LAME0A07602g,LAME0C03950g	LAFA0A00716g,LAFA0B03620g	LACI0H00672g,LACI0H05116g	LAFE0B00848g,LAFE0H01640g	LADA0C11804g,LADA0D09296g	LANO0D10594g,LANO0E13476g	LAMI0G17282g,LAMI0E01156g	SAKL0B00836g,SAKL0B12056g	YFL041W,YMR058W	FET5,FET3	Multicopper oxidase, integral membrane protein with similarity to Fet3p | Ferro-O2-oxidoreductase	vacuole (x1) | cytoplasm (x2) | plasma membrane (x1) | membrane (x1)	transmembrane transporter activity (x2) | oxidoreductase activity (x1)	ion transport (x1) | response to chemical stimulus (x2) | cellular ion homeostasis (x1) | transmembrane transport (x1)	-	0	0	0	0	0	0	0	0	0	0	-	-	-	-	-	-	-	-	-	-
137	2	2	2	2	2	2	2	2	2	2	2	LAWA0B12706g,LAWA0B05688g	KLTH0F19668g,KLTH0E06446g	LAME0C09186g,LAME0H16358g	LAFA0C02212g,LAFA0D11892g	LACI0F00672g,LACI0F07228g	LAFE0G18822g,LAFE0D04566g	LADA0D00320g,LADA0G03532g	LANO0F00496g,LANO0F08680g	LAMI0C00496g,LAMI0D07558g	SAKL0C13706g,SAKL0H25124g	YNL330C,YGL194C	RPD3,HOS2	Histone deacetylase | Histone deacetylase and subunit of Set3 and Rpd3L complexes	cytoplasm (x2) | nucleus (x1) | chromosome (x2)	hydrolase activity, acting on carbon-nitrogen (but not peptide) bonds (x2) | protein binding transcription factor activity (x1)	histone modification (x1) | mitotic cell cycle (x1) | response to starvation (x1) | regulation of DNA metabolic process (x2) | chromatin organization (x2) | transcription from RNA polymerase I promoter (x2) | DNA-dependent transcription, elongation (x1) | response to heat (x1) | regulation of cell cycle (x2) | signaling (x1) | meiotic cell cycle (x1) | DNA recombination (x1) | DNA replication (x1…	-	0	0	0	0	0	0	0	0	0	0	-	-	-	-	-	-	-	-	-	-
138	1	2	2	2	2	2	2	2	2	2	2	LAWA0B11562g	KLTH0F18546g,KLTH0E05434g	LAME0F04148g,LAME0H17414g	LAFA0E18734g,LAFA0D12970g	LACI0F01838g,LACI0F06238g	LAFE0G17700g,LAFE0D05622g	LADA0E03884g,LADA0H09758g	LANO0E05490g,LANO0F09714g	LAMI0F03202g,LAMI0H05512g	SAKL0F15576g,SAKL0F06424g	YLR454W,YPR117W	FMP27,Unknown name	Putative protein of unknown function | Putative protein of unknown function	mitochondrion (x1) | cytoplasm (x1) | unknown (x1)	unknown (x2)	unknown (x2)	-	1	0	0	0	0	0	0	0	0	0	LAWA0B04764g	-	-	-	-	-	-	-	-	-
139	2	2	2	2	1	2	2	2	2	2	2	LAWA0B02058g,LAWA0B05446g	KLTH0E02200g,KLTH0E06204g	LAME0A01288g,LAME0H16578g	LAFA0A07052g,LAFA0D12156g	LACI0F06964g	LAFE0D08416g,LAFE0D04808g	LADA0G01222g,LADA0G03334g	LANO0B04390g,LANO0F08900g	LAMI0B04082g,LAMI0C01596g	SAKL0G07106g,SAKL0H25388g	YDR258C,YLL026W	HSP78,HSP104	Oligomeric mitochondrial matrix chaperone that cooperates with Ssc1p in mitochondrial thermotolerance after heat shock | Disaggregase	mitochondrion (x2) | cytoplasm (x1) | nucleus (x1)	ion binding (x2) | ATPase activity (x1) | unfolded protein binding (x1)	response to chemical stimulus (x1) | regulation of organelle organization (x1) | mitochondrial translation (x1) | carbohydrate metabolic process (x1) | oligosaccharide metabolic process (x2) | protein folding (x1) | protein targeting (x1) | response to heat (x1) | regulation of translation (x1) | response to oxidative stress (x2) | mitochondrion organization (x1) | transmembrane transport (x1)	-	0	0	0	0	1	0	0	0	0	0	-	-	-	-	LACI0F03136g	-	-	-	-	-
140	3	2	2	2	2	2	2	2	1	2	2	LAWA0B03466g,LAWA0G13344g,LAWA0G13322g	KLTH0E04026g,KLTH0G06732g	LAME0D09186g,LAME0H09516g	LAFA0F17546g,LAFA0E12244g	LACI0F04764g,LACI0F12574g	LAFE0D07008g,LAFE0A04346g	LADA0F11254g,LADA0E07536g	LANO0B05820g,LANO0H10066g	LAMI0D03642g	SAKL0G08646g,SAKL0G10736g	YHR047C,YKL157W	AAP1,APE2	Arginine/alanine amino peptidase | Aminopeptidase yscII	extracellular region (x2) | cytoplasm (x1) | mitochondrion (x1) | nucleus (x1)	peptidase activity (x2)	carbohydrate metabolic process (x1) | generation of precursor metabolites and energy (x1) | other (x1)	-	0	0	0	0	0	0	0	0	0	0	-	-	-	-	-	-	-	-	-	-
141	2	2	2	2	2	2	2	2	2	2	2	LAWA0B03488g,LAWA0E07756g	KLTH0E04048g,KLTH0D08008g	LAME0F14532g,LAME0G14422g	LAFA0G18844g,LAFA0F07140g	LACI0F04786g,LACI0H18580g	LAFE0D06986g,LAFE0H15346g	LADA0F11232g,LADA0G12816g	LANO0B05842g,LANO0D04214g	LAMI0C04566g,LAMI0C10726g	SAKL0B05412g,SAKL0D13574g	YMR238W,YKL046C	DFG5,DCW1	Putative mannosidase, essential glycosylphosphatidylinositol (GPI)-anchored membrane protein required for cell wall biogenesis in bud formation, involved in filamentous growth, homologous to Dcw1p | Putative mannosidase, GPI-anchored membrane protein required for cell wall biosynthesis in bud formation	cytoplasm (x1) | cellular bud (x2) | plasma membrane (x2) | endoplasmic reticulum (x2) | membrane (x2)	unknown (x2)	cell wall organization or biogenesis (x2) | pseudohyphal growth (x2) | cell budding (x1)	-	0	0	0	0	0	0	0	0	0	0	-	-	-	-	-	-	-	-	-	-
142	1	2	2	2	2	2	2	2	2	2	2	LAWA0B10242g	KLTH0E07458g,KLTH0F17160g	LAME0F01200g,LAME0D01838g	LAFA0D10946g,LAFA0D15632g	LACI0F08328g,LACI0H23926g	LAFE0D03488g,LAFE0F02212g	LADA0G04456g,LADA0A01970g	LANO0F07712g,LANO0H23398g	LAMI0D06612g,LAMI0E12662g	SAKL0H21560g,SAKL0G01320g	YBL011W,YKR067W	SCT1,GPT2	Glycerol 3-phosphate/dihydroxyacetone phosphate dual substrate-specific sn-1 acyltransferase of the glycerolipid biosynthesis pathway, prefers 16-carbon fatty acids, similar to Gpt2p, gene is constitutively transcribed | Glycerol-3-phosphate/dihydroxyacetone phosphate dual substrate-specific sn-1 acyltransferase located in lipid particles and the ER	cytoplasm (x2) | endoplasmic reticulum (x2) | membrane (x2)	transferase activity, transferring acyl groups (x2)	lipid metabolic process (x2)	-	1	0	0	0	0	0	0	0	0	0	LAWA0D04236g	-	-	-	-	-	-	-	-	-
143	2	2	2	2	2	2	2	2	2	2	2	LAWA0G13058g,LAWA0E09978g	KLTH0G07018g,KLTH0D10318g	LAME0D08020g,LAME0F04302g	LAFA0F18734g,LAFA0E18580g	LACI0F12310g,LACI0G07910g	LAFE0A04610g,LAFE0G09582g	LADA0E07800g,LADA0C07756g	LANO0H09802g,LANO0H14796g	LAMI0D03312g,LAMI0H06282g	SAKL0G11000g,SAKL0H07458g	YHR028C,YOR219C	DAP2,STE13	Dipeptidyl aminopeptidase, synthesized as a glycosylated precursor | Dipeptidyl aminopeptidase, Golgi integral membrane protein that cleaves on the carboxyl side of repeating -X-Ala- sequences, required for maturation of alpha factor, transcription is induced by a-factor	vacuole (x1) | cytoplasm (x1) | other (x1) | membrane (x1)	peptidase activity (x2)	protein maturation (x2)	-	0	0	0	0	0	0	0	0	0	0	-	-	-	-	-	-	-	-	-	-
144	2	2	2	2	2	2	2	2	2	2	2	LAWA0G09450g,LAWA0G03180g	KLTH0G09218g,KLTH0F09284g	LAME0E04412g,LAME0D05974g	LAFA0F20802g,LAFA0G08746g	LACI0F15280g,LACI0F17326g	LAFE0E12112g,LAFE0E10066g	LADA0E09846g,LADA0C01684g	LANO0H07756g,LANO0G08724g	LAMI0E02982g,LAMI0C08394g	SAKL0E08888g,SAKL0E06776g	YNL067W,YGL147C	RPL9B,RPL9A	Ribosomal 60S subunit protein L9B | Ribosomal 60S subunit protein L9A	cytoplasm (x2) | ribosome (x2)	structural molecule activity (x2) | structural constituent of ribosome (x2)	cytoplasmic translation (x2)	-	0	0	0	0	0	0	0	0	0	0	-	-	-	-	-	-	-	-	-	-
145	1	1	0	1	2	3	0	6	1	0	1	LAWA0E06942g	KLTH0D06974g	-	LAFA0C07360g	LACI0H18800g,LACI0H18822g	LAFE0F07382g,LAFE0A03048g,LAFE0C01750g	-	LANO0H12684g,LANO0H12728g,LANO0F15038g,LANO0H12640g,LANO0A03576g,LANO0H18778g	LAMI0C10946g	-	YDL227C	HO	Site-specific endonuclease required for gene conversion at the MAT locus (homothallic switching) through the generation of a ds DNA break	nucleus (x1)	nuclease activity (x1)	DNA recombination (x1)	-	1	2	1	0	0	2	0	0	0	0	LAWA0E06920g	KLTH0D08228g,KLTH0D06941pg	LAME0H12046g	-	-	LAFE0F07360g,LAFE0F07536g	-	-	-	-
146	2	2	2	2	2	2	2	2	2	2	2	LAWA0E12552g,LAWA0E12618g	KLTH0D12870g,KLTH0D12848g	LAME0H05204g,LAME0H05226g	LAFA0E07976g,LAFA0E07998g	LACI0G05402g,LACI0G05424g	LAFE0E06436g,LAFE0E06414g	LADA0C05270g,LADA0C05292g	LANO0H17370g,LANO0H17348g	LAMI0A03884g,LAMI0A03906g	SAKL0H04884g,SAKL0H04906g	YOR286W,YOR285W	RDL2,RDL1	Protein with rhodanese activity | Protein of unknown function containing a rhodanese-like domain	mitochondrion (x2) | cytoplasm (x1) | mitochondrial envelope (x1) | endoplasmic reticulum (x1) | membrane (x2)	unknown (x1) | other (x1)	unknown (x2)	-	0	0	0	0	0	0	0	0	0	0	-	-	-	-	-	-	-	-	-	-
147	2	2	2	2	2	2	2	2	2	2	2	LAWA0E11782g,LAWA0C10242g	KLTH0D12210g,KLTH0B04268g	LAME0H02762g,LAME0C03862g	LAFA0B04742g,LAFA0B03532g	LACI0G06040g,LACI0H05204g	LAFE0E05798g,LAFE0H01728g	LADA0C05930g,LADA0D09384g	LANO0H16754g,LANO0E13564g	LAMI0A04544g,LAMI0E01244g	SAKL0H05544g,SAKL0B11968g	YOR270C,YMR054W	VPH1,STV1	Subunit a of vacuolar-ATPase V0 domain | Subunit a of the vacuolar-ATPase V0 domain, one of two isoforms (Stv1p and Vph1p)	vacuole (x1) | cytoplasm (x2) | Golgi apparatus (x2) | membrane (x2)	transmembrane transporter activity (x2) | ATPase activity (x2)	ion transport (x2) | cellular ion homeostasis (x1) | protein complex biogenesis (x1)	-	0	0	0	0	0	0	0	0	0	0	-	-	-	-	-	-	-	-	-	-
148	2	2	2	2	2	2	2	2	2	2	2	LAWA0F12200g,LAWA0A10748g	KLTH0E12848g,KLTH0H02486g	LAME0H07536g,LAME0B05864g	LAFA0E10242g,LAFA0G22254g	LACI0G12464g,LACI0H03686g	LAFE0G14334g,LAFE0B03796g	LADA0D04368g,LADA0F13278g	LANO0E08614g,LANO0E02476g	LAMI0E07448g,LAMI0E11210g	SAKL0H09746g,SAKL0F10032g	YDL131W,YDL182W	LYS21,LYS20	Homocitrate synthase isozyme | Homocitrate synthase isozyme	mitochondrion (x1) | cytoplasm (x1) | nucleus (x2)	transferase activity, transferring acyl groups (x2)	cellular amino acid metabolic process (x2)	-	0	0	0	0	0	0	0	0	0	0	-	-	-	-	-	-	-	-	-	-
149	2	2	2	2	2	2	2	2	2	2	2	LAWA0G04478g,LAWA0F08284g	KLTH0F10560g,KLTH0G11484g	LAME0E05578g,LAME0G11694g	LAFA0G09912g,LAFA0E19702g	LACI0G15192g,LACI0H10858g	LAFE0D09076g,LAFE0H07360g	LADA0C02938g,LADA0G05886g	LANO0G09912g,LANO0H05446g	LAMI0E10132g,LAMI0H17546g	SAKL0B07876g,SAKL0H14828g	YPR069C,YLR146C	SPE3,SPE4	Spermidine synthase, involved in biosynthesis of spermidine and also in biosynthesis of pantothenic acid | Spermine synthase, required for the biosynthesis of spermine and also involved in biosynthesis of pantothenic acid	cytoplasm (x2) | nucleus (x1)	transferase activity, transferring alkyl or aryl (other than methyl) groups (x2)	vitamin metabolic process (x2) | cellular amino acid metabolic process (x2) | cofactor metabolic process (x2)	-	0	0	0	0	0	0	0	0	0	0	-	-	-	-	-	-	-	-	-	-
150	2	2	2	2	2	2	2	2	2	2	2	LAWA0E02630g,LAWA0B08526g	KLTH0D02706g,KLTH0F15378g	LAME0B02498g,LAME0F10374g	LAFA0C08416g,LAFA0D06326g	LACI0G16710g,LACI0H22188g	LAFE0D10638g,LAFE0F03994g	LADA0F06876g,LADA0B03994g	LANO0H21682g,LANO0C02718g	LAMI0F06964g,LAMI0E14400g	SAKL0B09636g,SAKL0G03168g	YDR382W,YOL039W	RPP2B,RPP2A	Ribosomal protein P2 beta, a component of the ribosomal stalk, which is involved in the interaction between translational elongation factors and the ribosome | Ribosomal protein P2 alpha, a component of the ribosomal stalk, which is involved in the interaction between translational elongation factors and the ribosome	cytoplasm (x2) | ribosome (x2)	structural molecule activity (x2) | structural constituent of ribosome (x2)	translational elongation (x2) | cytoplasmic translation (x2)	-	0	0	0	0	0	0	0	0	0	0	-	-	-	-	-	-	-	-	-	-
151	2	2	2	2	2	2	2	2	2	2	2	LAWA0G15808g,LAWA0C09912g	KLTH0A05874g,KLTH0B04576g	LAME0H14422g,LAME0C04170g	LAFA0F06062g,LAFA0B03840g	LACI0G23442g,LACI0H04852g	LAFE0C02410g,LAFE0H01376g	LADA0B05974g,LADA0D08988g	LANO0A02366g,LANO0E13256g	LAMI0C01794g,LAMI0E00892g	SAKL0A02266g,SAKL0H02552g	YMR205C,YGR240C	PFK2,PFK1	Beta subunit of heterooctameric phosphofructokinase involved in glycolysis, indispensable for anaerobic growth, activated by fructose-2,6-bisphosphate and AMP, mutation inhibits glucose induction of cell cycle-related genes | Alpha subunit of heterooctameric phosphofructokinase involved in glycolysis, indispensable for anaerobic growth, activated by fructose-2,6-bisphosphate and AMP, mutation inh…	mitochondrion (x2) | cytoplasm (x2)	RNA binding (x1) | mRNA binding (x2) | kinase activity (x1)	ion transport (x2) | carbohydrate metabolic process (x2) | generation of precursor metabolites and energy (x2)	-	0	0	0	0	0	0	0	0	0	0	-	-	-	-	-	-	-	-	-	-
152	0	0	3	5	0	0	3	2	5	0	0	-	-	LAME0G13828g,LAME0H17084g,LAME0A00122g	LAFA0D00100g,LAFA0B00100g,LAFA0G20032g,LAFA0C10814g,LAFA0B08372g	-	-	LADA0G11870g,LADA0H02388g,LADA0C10638g	LANO0D03620g,LANO0D03598g	LAMI0G09054g,LAMI0A00254g,LAMI0F00144g,LAMI0C11342g,LAMI0A08064g	-	-	-	-	-	-	-	-	0	0	1	1	0	0	1	0	0	0	-	-	LAME0B00144g	LAFA0D12640g	-	-	LADA0G14026g	-	-	-
153	2	2	2	2	2	2	2	2	1	1	2	LAWA0C10638g,LAWA0A00584g	KLTH0B03806g,KLTH0C11440g	LAME0D10880g,LAME0C03510g	LAFA0B07778g,LAFA0B03180g	LACI0A02388g,LACI0C09670g	LAFE0A06766g,LAFE0F18162g	LADA0B10550g,LADA0D06392g	LANO0A06920g,LANO0E13938g	LAMI0H08372g	SAKL0G13288g	YGR177C,YOR377W	ATF2,ATF1	Alcohol acetyltransferase, may play a role in steroid detoxification | Alcohol acetyltransferase	cytoplasm (x2) | membrane (x1) | endoplasmic reticulum (x1) | endomembrane system (x1)	transferase activity, transferring acyl groups (x2)	response to chemical stimulus (x1) | generation of precursor metabolites and energy (x1) | lipid metabolic process (x1)	-	0	0	0	0	0	0	1	0	0	0	-	-	-	-	-	-	LADA0H13872g	-	-	-
154	3	2	2	2	2	2	2	2	2	2	0	LAWA0B00342g,LAWA0B11100g,LAWA0F12464g	KLTH0F18062g,KLTH0E13134g	LAME0G17568g,LAME0D01002g	LAFA0F10308g,LAFA0D16490g	LACI0H24784g,LACI0G12750g	LAFE0F01200g,LAFE0G14620g	LADA0D04082g,LADA0A01046g	LANO0H24256g,LANO0E08328g	LAMI0E07712g,LAMI0C03246g	SAKL0E14454g,SAKL0H09460g	-	-	-	-	-	-	-	0	0	0	0	0	0	0	0	0	0	-	-	-	-	-	-	-	-	-	-
155	1	3	1	1	3	2	2	2	2	1	0	LAWA0G00386g	KLTH0C11902g,KLTH0A00506g,KLTH0E00198g	LAME0F06502g	LAFA0B08196g	LACI0B05908g,LACI0H25796g,LACI0D00210g	LAFE0G10198g,LAFE0D13014g	LADA0B08900g,LADA0B08768g	LANO0F12354g,LANO0A05204g	LAMI0C00144g,LAMI0B09010g	SAKL0F16720g	-	-	-	-	-	-	-	0	0	0	0	0	1	1	1	0	0	-	-	-	-	-	LAFE0D12904g	LADA0B00298g	LANO0H15236g	-	-
156	2	1	2	2	2	2	2	2	2	2	1	LAWA0F07844g,LAWA0D00364g	KLTH0D18128g	LAME0F15544g,LAME0A04302g	LAFA0F15786g,LAFA0A05028g	LACI0H11342g,LACI0G01618g	LAFE0H07844g,LAFE0A01420g	LADA0G06370g,LADA0A07602g	LANO0H04962g,LANO0B01464g	LAMI0H17062g,LAMI0G09274g	SAKL0H15356g,SAKL0G17996g	YJR126C	VPS70	Protein of unknown function involved in vacuolar protein sorting	unknown (x1)	unknown (x1)	protein targeting (x1)	-	0	1	0	0	0	0	0	0	0	0	-	KLTH0G12122g	-	-	-	-	-	-	-	-
157	2	2	2	2	1	1	2	2	2	2	3	LAWA0D12200g,LAWA0H07712g	KLTH0G01826g,KLTH0H09196g	LAME0H19614g,LAME0H03180g	LAFA0D01772g,LAFA0E16996g	LACI0H15918g	LAFE0H12640g	LADA0G15126g,LADA0H11584g	LANO0D01838g,LANO0F05138g	LAMI0F11848g,LAMI0H13828g	SAKL0F01980g,SAKL0H20988g	YGL209W,YER028C,YGL035C	MIG2,MIG3,MIG1	Zinc finger transcriptional repressor | Transcriptional regulator | Transcription factor involved in glucose repression	mitochondrion (x1) | cytoplasm (x2) | nucleus (x1) | chromosome (x1) | endomembrane system (x3)	DNA binding (x3) | nucleic acid binding transcription factor activity (x3)	response to chemical stimulus (x1) | response to starvation (x3) | response to DNA damage stimulus (x2) | transcription from RNA polymerase II promoter (x3)	-	0	0	0	0	0	0	0	0	0	0	-	-	-	-	-	-	-	-	-	-
158	1	2	2	2	2	2	2	2	1	2	2	LAWA0G14642g	KLTH0A04686g,KLTH0D09922g	LAME0F13542g,LAME0F04676g	LAFA0B06854g,LAFA0E18206g	LACI0D00738g,LACI0G08306g	LAFE0B04676g,LAFE0G09978g	LADA0F10396g,LADA0C08130g	LANO0B06722g,LANO0H14422g	LAMI0E10352g	SAKL0F08998g,SAKL0H07964g	YER070W,YIL066C	RNR1,RNR3	Major isoform of large subunit of ribonucleotide-diphosphate reductase | Minor isoform of large subunit of ribonucleotide-diphosphate reductase	mitochondrion (x2) | cytoplasm (x1) | nucleus (x1)	oxidoreductase activity (x2)	nucleobase-containing small molecule metabolic process (x2)	-	1	0	0	0	0	0	0	0	0	0	LAWA0E09604g	-	-	-	-	-	-	-	-	-
159	2	2	2	2	2	2	1	2	2	2	1	LAWA0G09780g,LAWA0A10044g	KLTH0G09526g,KLTH0H03190g	LAME0D05732g,LAME0B05160g	LAFA0F21044g,LAFA0G21572g	LACI0F17062g,LACI0G22320g	LAFE0E11848g,LAFE0C03642g	LADA0F12596g	LANO0H07470g,LANO0E03158g	LAMI0C08108g,LAMI0C02850g	SAKL0E08580g,SAKL0A03454g	YPL231W	FAS2	Alpha subunit of fatty acid synthetase, which catalyzes the synthesis of long-chain saturated fatty acids	mitochondrion (x1) | cytoplasm (x1)	transferase activity, transferring acyl groups (x1) | oxidoreductase activity (x1)	lipid metabolic process (x1)	-	0	0	0	0	0	0	1	0	0	0	-	-	-	-	-	-	LADA0E10110g	-	-	-
160	2	2	2	2	2	2	2	2	1	2	2	LAWA0G07778g,LAWA0C02564g	KLTH0B08404g,KLTH0F02574g	LAME0G07096g,LAME0G02388g	LAFA0E03994g,LAFA0G02476g	LACI0H05798g,LACI0E10902g	LAFE0H02300g,LAFE0G02476g	LADA0F01706g,LADA0H02498g	LANO0C08042g,LANO0G02410g	LAMI0F14906g	SAKL0E14300g,SAKL0C02882g	YNL231C,YNL264C	PDR16,PDR17	Phosphatidylinositol transfer protein (PITP) | Phosphatidylinositol transfer protein (PITP), downregulates Plb1p-mediated turnover of phosphatidylcholine, found in the cytosol and microsomes, homologous to Pdr16p, deletion affects phospholipid composition	cytoplasm (x2) | plasma membrane (x1) | membrane (x1)	other (x2)	response to chemical stimulus (x1) | cellular amino acid metabolic process (x1) | ion transport (x2) | Golgi vesicle transport (x2) | lipid metabolic process (x2) | lipid transport (x2)	-	0	0	0	0	0	0	0	0	0	0	-	-	-	-	-	-	-	-	-	-
161	2	2	2	2	1	1	2	1	2	4	1	LAWA0E05688g,LAWA0E05710g	KLTH0D05676g,KLTH0D05698g	LAME0G16446g,LAME0G16424g	LAFA0F09164g,LAFA0F09142g	LACI0D10396g	LAFE0F07646g	LADA0G10770g,LADA0G10792g	LANO0D06216g	LAMI0G04126g,LAMI0G04104g	SAKL0E02728g,SAKL0E02706g,SAKL0E02640g,SAKL0E11440g	YKL096W	CWP1	Cell wall mannoprotein that localizes specifically to birth scars of daughter cells, linked to a beta-1,3- and beta-1,6-glucan heteropolymer through a phosphodiester bond	cell wall (x1) | membrane (x1)	structural molecule activity (x1)	cell wall organization or biogenesis (x1) | sporulation (x1)	-	0	0	0	0	0	0	0	1	0	0	-	-	-	-	-	-	-	LANO0D06238g	-	-
162	1	3	1	1	3	3	2	3	1	2	0	LAWA0G11364g	KLTH0A01848g,KLTH0E03212g,KLTH0E03344g	LAME0A04082g	LAFA0A04808g	LACI0D11408g,LACI0H25686g,LACI0H25752g	LAFE0H16336g,LAFE0F01706g,LAFE0F01662g	LADA0A07382g,LADA0B06524g	LANO0B01728g,LANO0A02828g,LANO0A05754g	LAMI0F13212g	SAKL0C11748g,SAKL0F00132g	-	-	-	-	-	-	-	0	0	0	0	0	0	0	0	0	1	-	-	-	-	-	-	-	-	-	SAKL0E00176pg
163	1	2	2	2	2	2	2	2	2	2	2	LAWA0E13256g	KLTH0F03872g,KLTH0D13464g	LAME0G03598g,LAME0F02168g	LAFA0G03686g,LAFA0D10044g	LACI0E09604g,LACI0G04896g	LAFE0G03752g,LAFE0E06942g	LADA0H03752g,LADA0G05534g	LANO0H17898g,LANO0G03576g	LAMI0G07844g,LAMI0A03334g	SAKL0C04488g,SAKL0H04092g	YJL190C,YLR367W	RPS22A,RPS22B	Protein component of the small (40S) ribosomal subunit | Protein component of the small (40S) ribosomal subunit	cytoplasm (x2) | ribosome (x2)	structural molecule activity (x2) | structural constituent of ribosome (x2)	cytoplasmic translation (x2)	-	0	0	0	0	0	0	0	0	0	0	-	-	-	-	-	-	-	-	-	-
164	2	2	2	2	2	2	2	2	1	2	2	LAWA0E09890g,LAWA0E09868g	KLTH0D10230g,KLTH0D10208g	LAME0F04390g,LAME0F04412g	LAFA0E18492g,LAFA0E18470g	LACI0G08020g,LACI0G08042g	LAFE0G09692g,LAFE0G09714g	LADA0C07844g,LADA0C07866g	LANO0H14708g,LANO0H14686g	LAMI0H06370g	SAKL0H07590g,SAKL0H07612g	YPL129W,YOR213C	TAF14,SAS5	Subunit of TFIID, TFIIF, INO80, SWI/SNF, and NuA3 complexes, involved in RNA polymerase II transcription initiation and in chromatin modification | Subunit of the SAS complex (Sas2p, Sas4p, Sas5p), which acetylates free histones and nucleosomes and regulates transcriptional silencing	nucleus (x2) | chromosome (x2)	transferase activity, transferring acyl groups (x1) | protein binding transcription factor activity (x1) | nucleic acid binding transcription factor activity (x1)	histone modification (x1) | DNA-dependent transcription, initiation (x1) | chromatin organization (x1) | peptidyl-amino acid modification (x1) | protein acylation (x1) | DNA-dependent transcription, elongation (x1) | other (x1) | transcription from RNA polymerase II promoter (x1)	-	0	0	0	0	0	0	0	0	0	0	-	-	-	-	-	-	-	-	-	-
165	1	4	0	5	0	0	0	0	0	0	0	LAWA0H00826g	KLTH0E14960g,KLTH0B05038g,KLTH0H00506g,KLTH0A00220g	-	LAFA0B01200g,LAFA0C03686g,LAFA0G12552g,LAFA0C02960g,LAFA0D07888g	-	-	-	-	-	-	-	-	-	-	-	-	-	0	1	2	6	0	1	0	0	1	0	-	KLTH0E03388pg	LAME0A00386g,LAME0E11122g	LAFA0F21616g,LAFA0G01596g,LAFA0D07866g,LAFA0F09714g,LAFA0F22606g,LAFA0D00144g	-	LAFE0B00298g	-	-	LAMI0G13432g	-
166	2	2	0	1	2	2	2	2	2	2	1	LAWA0H00694g,LAWA0G00342g	KLTH0C11770g,KLTH0C11858g	-	LAFA0F03400g	LACI0G02740g,LACI0G19042g	LAFE0A02630g,LAFE0H00584g	LADA0E00254g,LADA0B08834g	LANO0H25312g,LANO0A05270g	LAMI0H01772g,LAMI0C00232g	SAKL0G16852g,SAKL0F16610g	YML054C	CYB2	Cytochrome b2 (L-lactate cytochrome-c oxidoreductase), component of the mitochondrial intermembrane space, required for lactate utilization	mitochondrion (x1) | cytoplasm (x1) | mitochondrial envelope (x1)	oxidoreductase activity (x1)	other (x1)	-	0	0	0	0	0	0	2	0	0	0	-	-	-	-	-	-	LADA0G16776g,LADA0C00166g	-	-	-
167	2	1	2	2	2	2	2	1	2	2	2	LAWA0D08900g,LAWA0H13146g	KLTH0G05104g	LAME0H11144g,LAME0E12860g	LAFA0E13850g,LAFA0G17018g	LACI0C05182g,LACI0F13190g	LAFE0F13630g,LAFE0A03752g	LADA0G07734g,LADA0B02102g	LANO0H11716g	LAMI0H03048g,LAMI0C09296g	SAKL0G06292g,SAKL0B05434g	YDR463W,YHR006W	STP1,STP2	Transcription factor | Transcription factor	cytoplasm (x2) | nucleus (x1) | plasma membrane (x2) | membrane (x1)	DNA binding (x2) | nucleic acid binding transcription factor activity (x2)	RNA splicing (x1) | tRNA processing (x1) | transcription from RNA polymerase II promoter (x2)	-	0	0	0	0	0	0	0	0	0	0	-	-	-	-	-	-	-	-	-	-
168	2	2	3	1	1	2	1	2	1	1	3	LAWA0G14290g,LAWA0H14356g	KLTH0A04290g,KLTH0D00264g	LAME0F13916g,LAME0B00276g,LAME0D00122g	LAFA0B07206g	LACI0D01068g	LAFE0B05072g,LAFE0A08416g	LADA0D11606g	LANO0D11166g,LANO0B07118g	LAMI0G12046g	SAKL0F08624g	YER056C,YER060W,YER060W-A	FCY2,FCY21,FCY22	Purine-cytosine permease | Putative purine-cytosine permease, very similar to Fcy2p but cannot substitute for its function | Putative purine-cytosine permease, very similar to Fcy2p but cannot substitute for its function	vacuole (x1) | cytoplasm (x3) | plasma membrane (x3) | membrane (x1)	transmembrane transporter activity (x3)	nucleobase-containing compound transport (x1) | transmembrane transport (x3)	-	0	0	1	0	0	0	0	0	0	0	-	-	LAME0C09714g	-	-	-	-	-	-	-
169	1	2	2	2	2	2	2	2	2	2	1	LAWA0F02146g	KLTH0C03168g,KLTH0E13090g	LAME0D04918g,LAME0H07294g	LAFA0E01816g,LAFA0E10000g	LACI0D06986g,LACI0G12706g	LAFE0C11100g,LAFE0G14576g	LADA0H04566g,LADA0D04126g	LANO0F14818g,LANO0E08372g	LAMI0D08504g,LAMI0E07668g	SAKL0D12034g,SAKL0H09526g	YEL046C	GLY1	Threonine aldolase, catalyzes the cleavage of L-allo-threonine and L-threonine to glycine	cytoplasm (x1)	lyase activity (x1)	cellular amino acid metabolic process (x1)	-	0	0	0	0	0	0	0	0	0	0	-	-	-	-	-	-	-	-	-	-
170	2	2	2	1	2	2	2	2	2	2	0	LAWA0E13432g,LAWA0H04896g	KLTH0D13640g,KLTH0E10912g	LAME0F06942g,LAME0C07558g	LAFA0C03928g	LACI0G04676g,LACI0G19350g	LAFE0E07140g,LAFE0C06612g	LADA0E11870g,LADA0A03312g	LANO0H18074g,LANO0F02212g	LAMI0A03136g,LAMI0F08526g	SAKL0H03872g,SAKL0A06556g	-	-	-	-	-	-	-	0	0	0	1	0	0	0	0	0	0	-	-	-	LAFA0D09868g	-	-	-	-	-	-
171	1	1	2	1	1	2	1	2	2	1	5	LAWA0G07668g	KLTH0B08514g	LAME0G06964g,LAME0G20252g	LAFA0E03862g	LACI0H05688g	LAFE0H02190g,LAFE0D10572g	LADA0F01596g	LANO0C08152g,LANO0G04698g	LAMI0F15038g,LAMI0B06282g	SAKL0H02024g	YGR254W,YHR174W,YMR323W,YPL281C,YOR393W	ENO1,ENO2,ERR3,ERR2,ERR1	Enolase I, a phosphopyruvate hydratase | Enolase II, a phosphopyruvate hydratase | Enolase, a phosphopyruvate hydratase | Enolase, a phosphopyruvate hydratase | Protein of unknown function, has similarity to enolases	cytoplasm (x2) | unknown (x3) | vacuole (x2) | membrane (x2) | mitochondrion (x2) | plasma membrane (x2)	lyase activity (x5)	vacuole organization (x3) | regulation of organelle organization (x2) | carbohydrate metabolic process (x2) | membrane fusion (x2) | generation of precursor metabolites and energy (x2) | unknown (x2)	-	0	0	0	1	0	0	0	0	0	0	-	-	-	LAFA0F22584g	-	-	-	-	-	-
172	1	1	2	2	2	2	2	2	1	2	2	LAWA0G09340g	KLTH0G09108g	LAME0G03180g,LAME0D06084g	LAFA0G03268g,LAFA0F20692g	LACI0F17436g,LACI0E10088g	LAFE0E12222g,LAFE0G03290g	LADA0H03290g,LADA0E09736g	LANO0G03158g,LANO0H07866g	LAMI0C08504g	SAKL0E08998g,SAKL0C03938g	YIL130W,YJL206C	ASG1,Unknown name	Zinc cluster protein proposed to function as a transcriptional regulator involved in the stress response | Putative protein of unknown function	nucleus (x1) | unknown (x1)	DNA binding (x1) | unknown (x1)	unknown (x2)	-	0	0	0	0	0	0	0	0	0	0	-	-	-	-	-	-	-	-	-	-
173	1	2	2	3	1	2	1	1	2	1	1	LAWA0G17524g	KLTH0C00330g,KLTH0B00572g	LAME0A00364g,LAME0F00496g	LAFA0B08262g,LAFA0D00254g,LAFA0D17370g	LACI0G25070g	LAFE0H00298g,LAFE0C00518g	LADA0F15280g	LANO0A00628g	LAMI0A00694g,LAMI0C11210g	SAKL0A00374g	YLL055W	YCT1	High-affinity cysteine-specific transporter with similarity to the Dal5p family of transporters	cytoplasm (x1) | endoplasmic reticulum (x1) | membrane (x1)	transmembrane transporter activity (x1)	ion transport (x1) | amino acid transport (x1)	-	0	1	0	0	0	0	0	1	0	0	-	KLTH0D00286pg	-	-	-	-	-	LANO0H25334g	-	-
174	1	2	2	2	3	1	1	2	2	2	1	LAWA0B00430g	KLTH0E09878g,KLTH0E00616g	LAME0H06810g,LAME0D00298g	LAFA0E09538g,LAFA0D17194g	LACI0E00320g,LACI0F20296g,LACI0E00342g	LAFE0B00386g	LADA0A00276g	LANO0E11474g,LANO0H25026g	LAMI0F16622g,LAMI0C11166g	SAKL0H09504g,SAKL0H11528g	YNR058W	BIO3	7,8-diamino-pelargonic acid aminotransferase (DAPA), catalyzes the second step in the biotin biosynthesis pathway	cytoplasm (x1)	other (x1)	vitamin metabolic process (x1) | cofactor metabolic process (x1)	-	0	0	0	0	0	0	0	0	0	0	-	-	-	-	-	-	-	-	-	-
175	1	2	1	1	2	3	2	2	1	2	1	LAWA0H00606g	KLTH0B10032g,KLTH0E00484g	LAME0C00452g	LAFA0F12354g	LACI0A00672g,LACI0H02124g	LAFE0G00166g,LAFE0C00496g,LAFE0H00254g	LADA0B11496g,LADA0D13234g	LANO0B00386g,LANO0A00606g	LAMI0D00276g	SAKL0F16456g,SAKL0A00264g	YKL215C	OXP1	5-oxoprolinase	cytoplasm (x1)	hydrolase activity, acting on carbon-nitrogen (but not peptide) bonds (x1)	cellular amino acid metabolic process (x1)	-	0	0	0	0	0	0	0	1	0	0	-	-	-	-	-	-	-	LANO0A07514g	-	-
176	2	3	2	2	1	2	1	2	3	1	0	LAWA0D06436g,LAWA0C08240g	KLTH0E09680g,KLTH0B06182g,KLTH0B06402g	LAME0F17348g,LAME0H06458g	LAFA0E09230g,LAFA0F10990g	LACI0G10682g	LAFE0G12552g,LAFE0G14730g	LADA0E02542g	LANO0E11782g,LANO0H03158g	LAMI0B00232g,LAMI0B00914g,LAMI0B00716g	SAKL0E12078g	-	-	-	-	-	-	-	0	0	0	0	0	0	0	0	0	0	-	-	-	-	-	-	-	-	-	-
177	1	3	0	1	3	5	1	1	1	0	0	LAWA0G17854g	KLTH0G19536g,KLTH0G19558g,KLTH0D00440g	-	LAFA0E22034g	LACI0C10000g,LACI0G25400g,LACI0G25444g	LAFE0C13894g,LAFE0H00232g,LAFE0D00188g,LAFE0C00232g,LAFE0B12728g	LADA0B11606g	LANO0F00188g	LAMI0E01662g	-	-	-	-	-	-	-	-	0	0	0	1	2	0	0	0	0	0	-	-	-	LAFA0A07844g	LACI0C09956g,LACI0E13146g	-	-	-	-	-
178	2	3	2	2	1	1	0	2	1	2	1	LAWA0D01486g,LAWA0H00782g	KLTH0D00308g,KLTH0D16984g,KLTH0C00418g	LAME0A00562g,LAME0E00188g	LAFA0E21946g,LAFA0F22386g	LACI0C09626g	LAFE0F18118g	-	LANO0A07272g,LANO0F17546g	LAMI0B06194g	SAKL0D15092g,SAKL0B00440g	YOL154W	ZPS1	Putative GPI-anchored protein	vacuole (x1) | cell wall (x1) | cytoplasm (x1)	unknown (x1)	unknown (x1)	-	0	0	0	1	0	0	0	0	0	1	-	-	-	LAFA0A07756g	-	-	-	-	-	SAKL0E00583pg
179	0	2	1	1	2	3	3	3	1	1	0	-	KLTH0C10164g,KLTH0E03278g	LAME0H13938g	LAFA0F05622g	LACI0E01838g,LACI0H25620g	LAFE0E01794g,LAFE0F01772g,LAFE0G10264g	LADA0B06590g,LADA0B06502g,LADA0B06392g	LANO0H15324g,LANO0A02894g,LANO0A02784g	LAMI0B07030g	SAKL0A08514g	-	-	-	-	-	-	-	0	0	0	0	0	0	0	2	0	0	-	-	-	-	-	-	-	LANO0F17766g,LANO0B00144g	-	-
180	1	1	1	1	3	3	2	1	2	2	1	LAWA0C03972g	KLTH0F04180g	LAME0G03774g	LAFA0G03862g	LACI0H02146g,LACI0G25246g,LACI0E09428g	LAFE0H00276g,LAFE0C01838g,LAFE0G03950g	LADA0H20274g,LADA0H03928g	LANO0G03752g	LAMI0B08306g,LAMI0G08020g	SAKL0E15290g,SAKL0C04708g	YCR028C	FEN2	Plasma membrane H+-pantothenate symporter	vacuole (x1) | cytoplasm (x1) | plasma membrane (x1) | membrane (x1)	transmembrane transporter activity (x1)	ion transport (x1) | transmembrane transport (x1) | amino acid transport (x1) | endocytosis (x1)	-	0	0	0	0	0	0	0	0	0	0	-	-	-	-	-	-	-	-	-	-
181	1	1	2	1	3	2	0	2	1	2	0	LAWA0E00452g	KLTH0D00594g	LAME0B00298g,LAME0B00430g	LAFA0C10550g	LACI0A00804g,LACI0E05248g,LACI0G18888g	LAFE0E05204g,LAFE0D12838g	-	LANO0H25290g,LANO0C00540g	LAMI0G00694g	SAKL0D02596g,SAKL0D14916g	-	-	-	-	-	-	-	0	1	0	0	0	0	1	0	0	1	-	KLTH0A00396pg	-	-	-	-	LADA0A09010g	-	-	SAKL0G08932pg
182	2	2	2	1	2	2	2	2	1	1	1	LAWA0D02388g,LAWA0C13674g	KLTH0D16038g,KLTH0B00220g	LAME0H13960g,LAME0E08570g	LAFA0G12926g	LACI0G02454g,LACI0H25730g	LAFE0A02300g,LAFE0A08240g	LADA0B06546g,LADA0H14378g	LANO0A02850g,LANO0G12970g	LAMI0H01486g	SAKL0G17182g	YLR438W	CAR2	L-ornithine transaminase (OTAse)	cytoplasm (x1) | nucleus (x1)	other (x1)	cellular amino acid metabolic process (x1)	-	0	0	0	0	0	0	0	0	0	0	-	-	-	-	-	-	-	-	-	-
183	1	1	1	1	3	3	1	1	2	3	1	LAWA0D11980g	KLTH0G02024g	LAME0H19416g	LAFA0D01970g	LACI0A01178g,LACI0C07998g,LACI0B01200g	LAFE0A07888g,LAFE0F16490g,LAFE0B11716g	LADA0G14950g	LANO0D02014g	LAMI0F11650g,LAMI0E11848g	SAKL0G14938g,SAKL0F02178g,SAKL0D04510g	YKL217W	JEN1	Monocarboxylate/proton symporter of the plasma membrane	mitochondrion (x1) | cytoplasm (x1) | plasma membrane (x1) | membrane (x1)	transmembrane transporter activity (x1)	ion transport (x1) | transmembrane transport (x1)	-	0	0	0	0	0	0	0	0	0	0	-	-	-	-	-	-	-	-	-	-
184	3	5	0	0	3	2	1	1	1	0	1	LAWA0D00320g,LAWA0G18008g,LAWA0H00452g	KLTH0A07810g,KLTH0E16874g,KLTH0H00132g,KLTH0C11968g,KLTH0B00264g	-	-	LACI0B00188g,LACI0H00144g,LACI0B00298g	LAFE0C11364g,LAFE0H00342g	LADA0B00892g	LANO0H15302g	LAMI0E01684g	-	YJL213W	Unknown name	Protein of unknown function that may interact with ribosomes	cytoplasm (x1) | ribosome (x1)	unknown (x1)	unknown (x1)	-	1	0	0	0	0	0	0	0	0	0	LAWA0E14928g	-	-	-	-	-	-	-	-	-
185	2	4	0	0	0	3	0	0	0	0	0	LAWA0H00188g,LAWA0D13696g	KLTH0B10318g,KLTH0B10428g,KLTH0D00132g,KLTH0G00396g	-	-	-	LAFE0E00298g,LAFE0B00100g,LAFE0C00100g	-	-	-	-	-	-	-	-	-	-	-	5	0	0	0	0	2	1	1	0	0	LAWA0F07756g,LAWA0H14554g,LAWA0C00166g,LAWA0D00100g,LAWA0H00210g	-	-	-	-	LAFE0A00100g,LAFE0E00100g	LADA0A09208g	LANO0F17810g	-	-
186	1	1	2	1	2	2	1	1	2	2	3	LAWA0A11650g	KLTH0H01650g	LAME0G01596g,LAME0B06766g	LAFA0G23156g	LACI0F01046g,LACI0H02740g	LAFE0G18470g,LAFE0B02872g	LADA0F14158g	LANO0E01574g	LAMI0G06744g,LAMI0E15170g	SAKL0C13310g,SAKL0F11176g	YDR391C,YOR012W,YOR013W	Unknown name,IRC11,Unknown name	Putative protein of unknown function, possibly involved in zinc homeostasis | Putative protein of unknown function | Dubious opening reading frame unlikely to encode a protein, based on available experimental and comparative sequence data	nucleus (x2) | cytoplasm (x1) | unknown (x1)	unknown (x3)	DNA recombination (x1) | unknown (x2)	YOR013W	0	0	0	0	0	0	0	0	0	0	-	-	-	-	-	-	-	-	-	-
187	1	1	0	3	1	1	1	2	2	1	1	LAWA0D11122g	KLTH0G02816g	-	LAFA0E00826g,LAFA0E12134g,LAFA0D02674g	LACI0C07338g	LAFE0F15830g	LADA0B09032g	LANO0H25092g,LANO0D02718g	LAMI0G06458g,LAMI0D10704g	SAKL0G03960g	YKL221W	MCH2	Protein with similarity to mammalian monocarboxylate permeases, which are involved in transport of monocarboxylic acids across the plasma membrane	membrane (x1)	other (x1)	other (x1)	-	0	0	0	0	1	0	2	0	0	0	-	-	-	-	LACI0E00232g	-	LADA0E12596g,LADA0G14268g	-	-	-
188	1	0	1	4	2	2	1	3	0	0	1	LAWA0H00540g	-	LAME0F16072g	LAFA0A00254g,LAFA0G24608g,LAFA0G24564g,LAFA0A00210g	LACI0C09868g,LACI0F00188g	LAFE0C11342g,LAFE0H00188g	LADA0B10990g	LANO0G07470g,LANO0G07448g,LANO0C01750g	-	-	YLL056C	Unknown name	Putative protein of unknown function, transcription is activated by paralogous transcription factors Yrm1p and Yrr1p and genes involved in pleiotropic drug resistance (PDR)	unknown (x1)	unknown (x1)	unknown (x1)	-	0	1	0	0	0	1	0	0	0	0	-	KLTH0G00264pg	-	-	-	LAFE0E15280g	-	-	-	-
189	1	1	1	1	1	2	2	1	1	0	3	LAWA0C01838g	KLTH0C00352g	LAME0G01706g	LAFA0G01772g	LACI0C09736g	LAFE0F18272g,LAFE0H00496g	LADA0H01750g,LADA0F15764g	LANO0G01684g	LAMI0C11254g	-	YIL166C,YOL163W,YOL162W	Unknown name,Unknown name,Unknown name	Putative protein with similarity to the allantoate permease (Dal5p) subfamily of the major facilitator superfamily | Putative protein of unknown function | Putative protein of unknown function	membrane (x3)	other (x1) | transmembrane transporter activity (x2)	other (x1) | transmembrane transport (x2)	-	0	1	0	0	0	0	0	0	0	2	-	KLTH0A00154pg	-	-	-	-	-	-	-	SAKL0D15048pg,SAKL0G19932pg
190	1	1	3	1	2	1	3	2	1	1	1	LAWA0F15434g	KLTH0G19338g	LAME0F20274g,LAME0A07976g,LAME0F20318g	LAFA0A00320g	LACI0A00606g,LACI0C02190g	LAFE0F10638g	LADA0E00144g,LADA0E00474g,LADA0E00122g	LANO0H25136g,LANO0D10990g	LAMI0A06370g	SAKL0D09746g	YHR018C	ARG4	Argininosuccinate lyase, catalyzes the final step in the arginine biosynthesis pathway	cytoplasm (x1)	lyase activity (x1)	cellular amino acid metabolic process (x1)	-	0	0	0	0	0	0	0	0	0	0	-	-	-	-	-	-	-	-	-	-
191	1	0	1	1	3	3	2	1	2	2	1	LAWA0H14378g	-	LAME0C00518g	LAFA0B00254g	LACI0H00232g,LACI0G25268g,LACI0F00430g	LAFE0C01816g,LAFE0B00474g,LAFE0G19064g	LADA0H20252g,LADA0E15038g	LANO0D11100g	LAMI0C00320g,LAMI0B08284g	SAKL0E15312g,SAKL0H11990g	YDR242W	AMD2	Putative amidase	unknown (x1)	hydrolase activity, acting on carbon-nitrogen (but not peptide) bonds (x1)	unknown (x1)	-	0	0	0	0	0	0	0	0	0	0	-	-	-	-	-	-	-	-	-	-
192	1	1	1	1	1	1	0	1	2	3	2	LAWA0G12552g	KLTH0A00550g	LAME0C00496g	LAFA0C00320g	LACI0E13102g	LAFE0A08262g	-	LANO0E00848g	LAMI0C11144g,LAMI0C07888g	SAKL0D09944g,SAKL0C03894g,SAKL0H10428g	YIR019C,YDL037C	FLO11,BSC1	GPI-anchored cell surface glycoprotein (flocculin) | Protein of unconfirmed function, similar to cell surface flocculin Flo11p	site of polarized growth (x1) | extracellular region (x1) | unknown (x1) | membrane (x1) | cellular bud (x1) | plasma membrane (x1)	unknown (x2)	pseudohyphal growth (x1) | invasive growth in response to glucose limitation (x1) | unknown (x1)	-	0	0	1	0	1	0	0	1	0	0	-	-	LAME0F20208g	-	LACI0H25598g	-	-	LANO0H00166g	-	-
193	1	0	1	1	2	2	2	1	1	2	1	LAWA0C01860g	-	LAME0G01728g	LAFA0G01794g	LACI0A03730g,LACI0C09714g	LAFE0H00518g,LAFE0F18250g	LADA0H01772g,LADA0F15786g	LANO0G01706g	LAMI0H20010g	SAKL0E00638g,SAKL0F06072g	YLL057C	JLP1	Fe(II)-dependent sulfonate/alpha-ketoglutarate dioxygenase, involved in sulfonate catabolism for use as a sulfur source	unknown (x1)	oxidoreductase activity (x1)	other (x1)	-	0	1	0	0	0	0	0	0	0	2	-	KLTH0F01870pg	-	-	-	-	-	-	-	SAKL0D15026pg,SAKL0G19976pg
194	2	2	2	2	1	1	2	2	1	1	1	LAWA0G00936g,LAWA0H06700g	KLTH0G07986g,KLTH0H07964g	LAME0D07074g,LAME0C05710g	LAFA0F19680g,LAFA0C05842g	LACI0F20274g	LAFE0H11474g	LADA0E08724g,LADA0A05248g	LANO0H08856g,LANO0F04082g	LAMI0H12728g	SAKL0H19316g	YER001W	MNN1	Alpha-1,3-mannosyltransferase, integral membrane glycoprotein of the Golgi complex, required for addition of alpha1,3-mannose linkages to N-linked and O-linked oligosaccharides, one of five S. cerevisiae proteins of the MNN1 family	cytoplasm (x1) | Golgi apparatus (x1)	transferase activity, transferring glycosyl groups (x1)	protein glycosylation (x1) | carbohydrate metabolic process (x1) | oligosaccharide metabolic process (x1)	-	0	0	0	0	0	0	0	0	0	0	-	-	-	-	-	-	-	-	-	-
195	1	1	2	2	1	1	2	2	1	3	1	LAWA0A05534g	KLTH0G15070g	LAME0G10154g,LAME0F16820g	LAFA0E15852g,LAFA0F14554g	LACI0B04874g	LAFE0C07976g	LADA0F04786g,LADA0E03070g	LANO0C04940g,LANO0H03708g	LAMI0C06128g	SAKL0A07964g,SAKL0E00616g,SAKL0C11660g	YLR286C	CTS1	Endochitinase, required for cell separation after mitosis	site of polarized growth (x1) | extracellular region (x1) | cytoplasm (x1) | endoplasmic reticulum (x1) | endomembrane system (x1) | nucleus (x1) | cell wall (x1) | cellular bud (x1)	hydrolase activity, acting on glycosyl bonds (x1)	cytokinesis (x1)	-	0	0	0	0	0	0	0	0	0	0	-	-	-	-	-	-	-	-	-	-
196	2	1	1	1	1	2	1	1	1	2	3	LAWA0H05732g,LAWA0B02146g	KLTH0H06974g	LAME0C06722g	LAFA0C04830g	LACI0B05292g	LAFE0C07536g,LAFE0D08350g	LADA0A04148g	LANO0F03026g	LAMI0C00716g	SAKL0A07568g,SAKL0G07172g	YLR300W,YOR190W,YDR261C	EXG1,SPR1,EXG2	Major exo-1,3-beta-glucanase of the cell wall | Sporulation-specific exo-1,3-beta-glucanase | Exo-1,3-beta-glucanase, involved in cell wall beta-glucan assembly	extracellular region (x3) | cell wall (x1)	hydrolase activity, acting on glycosyl bonds (x3)	cell wall organization or biogenesis (x1) | sporulation (x2) | carbohydrate metabolic process (x1)	-	0	0	0	0	0	0	0	0	0	1	-	-	-	-	-	-	-	-	-	SAKL0D15202pg
197	0	0	2	4	0	0	4	3	1	0	0	-	-	LAME0A00144g,LAME0B00188g	LAFA0E22100g,LAFA0A07910g,LAFA0E22078g,LAFA0A07888g	-	-	LADA0C13036g,LADA0D13454g,LADA0F00166g,LADA0E00188g	LANO0F00144g,LANO0E00122g,LANO0H25400g	LAMI0F00100g	-	-	-	-	-	-	-	-	0	0	0	0	0	0	2	1	0	0	-	-	-	-	-	-	LADA0B00122g,LADA0C00100g	LANO0C00166g	-	-
198	1	1	1	2	2	2	1	1	2	2	1	LAWA0D13366g	KLTH0G00638g	LAME0H20802g	LAFA0C10770g,LAFA0F00210g	LACI0C09340g,LACI0H03928g	LAFE0F17854g,LAFE0B04038g	LADA0G16314g	LANO0D00650g	LAMI0D01684g,LAMI0E10924g	SAKL0F00704g,SAKL0F09746g	YDL124W	Unknown name	NADPH-dependent alpha-keto amide reductase	cytoplasm (x1) | nucleus (x1) | plasma membrane (x1) | membrane (x1)	oxidoreductase activity (x1)	response to chemical stimulus (x1) | response to oxidative stress (x1)	-	0	0	0	0	0	1	0	0	0	0	-	-	-	-	-	LAFE0F17876g	-	-	-	-
199	2	2	1	1	2	2	1	2	1	2	1	LAWA0H03774g,LAWA0F05930g	KLTH0G17314g,KLTH0C06798g	LAME0F10946g	LAFA0D05754g	LACI0D03708g,LACI0H01442g	LAFE0B01574g,LAFE0B07866g	LADA0H08834g	LANO0F11276g,LANO0C02806g	LAMI0D12640g	SAKL0B04686g,SAKL0F12320g	YBL064C	PRX1	Mitochondrial peroxiredoxin with thioredoxin peroxidase activity	mitochondrion (x1) | cytoplasm (x1)	oxidoreductase activity (x1)	response to chemical stimulus (x1) | response to oxidative stress (x1)	-	0	0	0	0	0	0	0	0	0	0	-	-	-	-	-	-	-	-	-	-
200	0	0	0	1	4	3	0	0	2	6	1	-	-	-	LAFA0A01266g	LACI0D04632g,LACI0D04654g,LACI0F07976g,LACI0G19460g	LAFE0B08790g,LAFE0B08834g,LAFE0D03818g	-	-	LAMI0G16732g,LAMI0G16754g	SAKL0B01342g,SAKL0B01452g,SAKL0B01386g,SAKL0B04070g,SAKL0E08712g,SAKL0B01408g	YIL119C	RPI1	Transcription factor with allelic differences between S288C and Sigma1278b	nucleus (x1)	enzyme regulator activity (x1)	cell wall organization or biogenesis (x1) | signaling (x1) | transcription from RNA polymerase II promoter (x1)	-	0	0	0	0	0	0	0	0	0	0	-	-	-	-	-	-	-	-	-	-
201	1	2	1	1	2	2	1	1	2	1	2	LAWA0C11760g	KLTH0B00418g,KLTH0D16412g	LAME0E08944g	LAFA0G13300g	LACI0G00562g,LACI0G02058g	LAFE0A00342g,LAFE0A01904g	LADA0H14752g	LANO0G13344g	LAMI0E16314g,LAMI0H01112g	SAKL0G17578g	YFL053W,YML070W	DAK2,DAK1	Dihydroxyacetone kinase, required for detoxification of dihydroxyacetone (DHA) | Dihydroxyacetone kinase, required for detoxification of dihydroxyacetone (DHA)	cytoplasm (x1) | unknown (x1)	kinase activity (x2)	carbohydrate metabolic process (x2)	-	1	0	0	0	0	0	0	0	0	0	LAWA0D01948g	-	-	-	-	-	-	-	-	-
202	2	1	1	2	1	1	1	1	2	2	1	LAWA0D00254g,LAWA0G00276g	KLTH0E16808g	LAME0H05622g	LAFA0E08394g,LAFA0B08240g	LACI0H20362g	LAFE0F05842g	LADA0D07866g	LANO0A05358g	LAMI0B01838g,LAMI0G17854g	SAKL0E11110g,SAKL0F16632g	YNL125C	ESBP6	Protein with similarity to monocarboxylate permeases, appears not to be involved in transport of monocarboxylates such as lactate, pyruvate or acetate across the plasma membrane	mitochondrion (x1) | cytoplasm (x1) | endoplasmic reticulum (x1) | membrane (x1)	other (x1)	other (x1)	-	0	0	0	0	0	0	0	1	0	0	-	-	-	-	-	-	-	LANO0A07316g	-	-
203	2	2	1	1	2	2	1	1	2	1	1	LAWA0H04236g,LAWA0E05490g	KLTH0D05434g,KLTH0H05456g	LAME0G16666g	LAFA0F09384g	LACI0D10616g,LACI0G20120g	LAFE0F07514g,LAFE0C05886g	LADA0G10550g	LANO0D06458g	LAMI0G04346g,LAMI0F07778g	SAKL0E02992g	YMR088C	VBA1	Permease of basic amino acids in the vacuolar membrane	vacuole (x1) | cytoplasm (x1) | membrane (x1)	transmembrane transporter activity (x1)	ion transport (x1) | amino acid transport (x1)	-	0	0	0	0	0	0	0	0	0	0	-	-	-	-	-	-	-	-	-	-
204	0	1	0	1	3	2	2	0	0	0	7	-	KLTH0E16852g	-	LAFA0F18646g	LACI0A00342g,LACI0D00144g,LACI0E13168g	LAFE0D00364g,LAFE0H00122g	LADA0G00166g,LADA0F15852g	-	-	-	YNL331C,YDL243C,YCR107W,YJR155W,YFL056C,YFL057C,YOL165C	AAD14,AAD4,AAD3,AAD10,AAD6,AAD16,AAD15	Putative aryl-alcohol dehydrogenase | Putative aryl-alcohol dehydrogenase | Putative aryl-alcohol dehydrogenase | Putative aryl-alcohol dehydrogenase | Putative aryl-alcohol dehydrogenase | Putative aryl-alcohol dehydrogenase | Putative aryl-alcohol dehydrogenase	unknown (x7)	oxidoreductase activity (x7)	other (x7)	-	0	0	0	0	0	0	0	0	0	0	-	-	-	-	-	-	-	-	-	-
205	1	1	1	1	3	1	1	2	1	1	2	LAWA0G17216g	KLTH0A07260g	LAME0H15808g	LAFA0F13014g	LACI0A00386g,LACI0G24762g,LACI0B05930g	LAFE0C00826g	LADA0F14972g	LANO0A00958g,LANO0A00980g	LAMI0A01090g	SAKL0A00704g	YKL222C,YOR172W	Unknown name,YRM1	Protein of unknown function that may interact with ribosomes, based on co-purification experiments | Zn2-Cys6 zinc-finger transcription factor that activates genes involved in multidrug resistance	cytoplasm (x2) | cytoskeleton (x1) | nucleus (x2) | ribosome (x1)	DNA binding (x2) | nucleic acid binding transcription factor activity (x1)	transcription from RNA polymerase II promoter (x1) | unknown (x1)	-	0	0	0	0	0	0	0	0	0	1	-	-	-	-	-	-	-	-	-	SAKL0A00682pg
206	0	1	1	1	2	2	2	2	1	1	2	-	KLTH0A01936g	LAME0A03994g	LAFA0A04720g	LACI0B03202g,LACI0D11320g	LAFE0H16424g,LAFE0H16248g	LADA0F00474g,LADA0A07294g	LANO0C09802g,LANO0A07580g	LAMI0D13432g	SAKL0C11572g	YBR020W,YDR009W	GAL1,GAL3	Galactokinase | Transcriptional regulator	cytoplasm (x2) | nucleus (x1)	kinase activity (x1) | other (x1)	response to chemical stimulus (x2) | carbohydrate metabolic process (x2) | transcription from RNA polymerase II promoter (x1)	-	0	0	0	0	0	0	0	1	0	0	-	-	-	-	-	-	-	LANO0H00122g	-	-
207	0	1	1	1	1	1	2	1	1	1	3	-	KLTH0A01958g	LAME0A03972g	LAFA0A04698g	LACI0B03224g	LAFE0H16226g	LADA0F00452g,LADA0A07272g	LANO0A07602g	LAMI0D13388g	SAKL0C11550g	YBR019C,YNR071C,YHR210C	GAL10,Unknown name,Unknown name	UDP-glucose-4-epimerase, catalyzes the interconversion of UDP-galactose and UDP-D-glucose in galactose metabolism | Putative aldose 1-epimerase | Putative aldose 1-epimerase superfamily protein	cytoplasm (x2) | unknown (x1)	isomerase activity (x1) | unknown (x2)	carbohydrate metabolic process (x2) | unknown (x1)	-	0	0	0	0	0	0	0	2	1	0	-	-	-	-	-	-	-	LANO0H00100g,LANO0C09824g	LAMI0H20076g	-
208	1	1	1	1	2	2	1	1	2	2	2	LAWA0F08570g	KLTH0G11198g	LAME0G11958g	LAFA0E19988g	LACI0G18580g,LACI0H10594g	LAFE0D12552g,LAFE0H07096g	LADA0G05600g	LANO0H05732g	LAMI0F13454g,LAMI0H17810g	SAKL0D14608g,SAKL0H14542g	YAL054C,YLR153C	ACS1,ACS2	Acetyl-coA synthetase isoform which, along with Acs2p, is the nuclear source of acetyl-coA for histone acetylation | Acetyl-coA synthetase isoform which, along with Acs1p, is the nuclear source of acetyl-coA for histone acetylation	mitochondrion (x2) | cytoplasm (x1) | nucleolus (x1) | nucleus (x1) | membrane (x1)	ligase activity (x2)	histone modification (x2) | cofactor metabolic process (x2) | chromatin organization (x1) | peptidyl-amino acid modification (x2) | protein acylation (x2) | generation of precursor metabolites and energy (x2)	-	0	0	0	0	0	0	0	0	0	0	-	-	-	-	-	-	-	-	-	-
209	0	0	0	0	1	4	0	0	0	0	0	-	-	-	-	LACI0C00100g	LAFE0C02894g,LAFE0C00144g,LAFE0C00122g,LAFE0C01662g	-	-	-	-	-	-	-	-	-	-	-	0	0	0	0	0	11	0	0	0	0	-	-	-	-	-	LAFE0E15302g,LAFE0C00089pg,LAFE0F00144g,LAFE0G19306g,LAFE0G00100g,LAFE0F18294g,LAFE0F00122g,LAFE0A08438g,LAFE0E15324g,LAFE0H00100g,LAFE0A08460g	-	-	-	-
210	2	1	2	1	1	1	1	1	2	1	1	LAWA0A06436g,LAWA0A00650g	KLTH0G14190g	LAME0G09252g,LAME0D10858g	LAFA0E06128g	LACI0H13344g	LAFE0H09912g	LADA0F03818g	LANO0C05886g	LAMI0H15104g,LAMI0B08086g	SAKL0H17666g	YER176W	ECM32	DNA dependent ATPase/DNA helicase belonging to the Dna2p- and Nam7p-like family of helicases that is involved in modulating translation termination	other (x1)	helicase activity (x1)	regulation of translation (x1)	-	0	0	0	1	0	0	0	1	0	0	-	-	-	LAFA0B07756g	-	-	-	LANO0A06898g	-	-
211	1	1	1	1	2	1	2	1	4	1	1	LAWA0G17722g	KLTH0A07744g	LAME0F00210g	LAFA0F12486g	LACI0D07272g,LACI0G18536g	LAFE0D12508g	LADA0F15478g,LADA0A00540g	LANO0A00386g	LAMI0E03268g,LAMI0E03290g,LAMI0F05160g,LAMI0A00166g	SAKL0D14564g	YAL049C	AIM2	Cytoplasmic protein involved in mitochondrial function or organization	cytoplasm (x1)	unknown (x1)	unknown (x1)	-	0	0	0	0	0	0	0	0	0	0	-	-	-	-	-	-	-	-	-	-
212	0	1	2	0	1	2	1	2	1	2	3	-	KLTH0F00440g	LAME0B00254g,LAME0G00210g	-	LACI0E12992g	LAFE0G18998g,LAFE0G00320g	LADA0E00430g	LANO0G00276g,LANO0E09868g	LAMI0A00452g	SAKL0C13904g,SAKL0C00418g	YCL064C,YIL167W,YIL168W	CHA1,SDL1,Unknown name	Catabolic L-serine (L-threonine) deaminase, catalyzes the degradation of both L-serine and L-threonine | Open reading frame, unlikely to produce a functional protein in S288C | Open reading frame, unlikely to produce a functional protein in S288C	mitochondrion (x1) | cytoplasm (x1)	lyase activity (x1)	cellular amino acid metabolic process (x1)	-	0	0	0	0	0	0	0	0	0	1	-	-	-	-	-	-	-	-	-	SAKL0H00220pg
213	2	2	1	1	1	3	1	1	2	1	1	LAWA0H14048g,LAWA0H14026g	KLTH0H15928g,KLTH0H15950g	LAME0H08394g	LAFA0G01706g	LACI0F11056g	LAFE0D00804g,LAFE0D00826g,LAFE0D00848g	LADA0D05248g	LANO0E09494g	LAMI0D13124g,LAMI0B08724g	SAKL0E05544g	YMR152W	YIM1	Protein of unknown function	mitochondrion (x1) | cytoplasm (x1)	unknown (x1)	response to DNA damage stimulus (x1)	-	0	0	0	0	0	0	0	0	0	0	-	-	-	-	-	-	-	-	-	-
214	1	1	1	1	1	1	1	1	3	2	3	LAWA0C08988g	KLTH0B05610g	LAME0H05886g	LAFA0E08658g	LACI0G10000g	LAFE0G11870g	LADA0D08130g	LANO0E12354g	LAMI0B01530g,LAMI0B01508g,LAMI0B01574g	SAKL0E11396g,SAKL0E11418g	YLR460C,YNL134C,YCR102C	Unknown name,Unknown name,Unknown name	Member of the quinone oxidoreductase family, up-regulated in response to the fungicide mancozeb | Protein of unknown function | Putative protein of unknown function, involved in copper metabolism	nucleus (x2) | cytoplasm (x1) | unknown (x1)	unknown (x2) | oxidoreductase activity (x1)	response to chemical stimulus (x2) | unknown (x1)	-	0	0	0	0	0	0	0	0	0	0	-	-	-	-	-	-	-	-	-	-
215	1	1	1	1	2	2	1	1	2	2	2	LAWA0C04170g	KLTH0F04378g	LAME0G03972g	LAFA0G04060g	LACI0E09230g,LACI0G04654g	LAFE0G04148g,LAFE0E07162g	LADA0E04082g	LANO0G03972g	LAMI0G08218g,LAMI0A03092g	SAKL0C04906g,SAKL0H03850g	YJL174W,YDL049C	KRE9,KNH1	Glycoprotein involved in cell wall beta-glucan assembly | Protein with similarity to Kre9p, which is involved in cell wall beta 1,6-glucan synthesis	extracellular region (x1) | cell wall (x2)	unknown (x2)	cell wall organization or biogenesis (x2) | carbohydrate metabolic process (x1)	-	0	0	0	0	0	0	0	0	0	0	-	-	-	-	-	-	-	-	-	-
216	2	1	1	1	1	1	1	1	1	3	3	LAWA0B08460g,LAWA0B08504g	KLTH0F15268g	LAME0F10330g	LAFA0D06370g	LACI0H22144g	LAFE0F04038g	LADA0B04038g	LANO0H21638g	LAMI0E14444g	SAKL0G03278g,SAKL0G03322g,SAKL0D09328g	YDR384C,YNR002C,YCR010C	ATO3,ATO2,ADY2	Plasma membrane protein, regulation pattern suggests a possible role in export of ammonia from the cell | Putative transmembrane protein involved in export of ammonia | Acetate transporter required for normal sporulation	mitochondrion (x3) | cytoplasm (x3) | plasma membrane (x3) | membrane (x3)	transmembrane transporter activity (x3)	ion transport (x3) | transmembrane transport (x2)	-	0	0	0	0	0	0	0	0	0	0	-	-	-	-	-	-	-	-	-	-
217	4	0	1	4	0	1	0	0	0	0	0	LAWA0E08240g,LAWA0G11628g,LAWA0A02146g,LAWA0A02168g	-	LAME0F01728g	LAFA0F01816g,LAFA0E20032g,LAFA0E03730g,LAFA0G23904g	-	LAFE0B06744g	-	-	-	-	-	-	-	-	-	-	-	0	1	0	2	0	2	1	0	0	0	-	KLTH0F15334g	-	LAFA0E11122g1_2,LAFA0E11122g	-	LAFE0C11210g,LAFE0B06744g1_2	LADA0H12618g	-	-	-
218	1	1	1	1	2	2	2	1	1	1	2	LAWA0F00914g	KLTH0E15840g	LAME0G19416g	LAFA0F01596g	LACI0B01002g,LACI0H09208g	LAFE0B11914g,LAFE0H05732g	LADA0D12266g,LADA0C00408g	LANO0B07844g	LAMI0E15588g	SAKL0C08008g	YDL012C,YBR016W	Unknown name,Unknown name	Tail-anchored plasma membrane protein with a conserved CYSTM module | Tail-anchored plasma membrane protein with a conserved CYSTM module	cellular bud (x1) | plasma membrane (x2) | membrane (x2)	unknown (x2)	unknown (x2)	-	0	0	0	0	0	0	0	0	0	0	-	-	-	-	-	-	-	-	-	-
219	2	1	0	3	0	1	0	0	1	1	2	LAWA0G12596g,LAWA0B12992g	KLTH0G19690g	-	LAFA0C00188g,LAFA0G24630g,LAFA0A00188g	-	LAFE0E15016g	-	-	LAMI0B06986g	SAKL0D15180g	YNR059W,YGL257C	MNT4,MNT2	Putative alpha-1,3-mannosyltransferase, not required for protein O-glycosylation | Mannosyltransferase involved in adding the 4th and 5th mannose residues of O-linked glycans	unknown (x2)	transferase activity, transferring glycosyl groups (x2)	protein glycosylation (x2) | carbohydrate metabolic process (x2)	-	0	1	1	0	0	0	0	2	0	0	-	KLTH0C00132pg	LAME0H19218g	-	-	-	-	LANO0B08702g,LANO0E16908g	-	-
220	1	1	1	1	2	2	1	1	1	2	2	LAWA0F07558g	KLTH0H04862g	LAME0C08790g	LAFA0C02608g	LACI0B05710g,LACI0G20648g	LAFE0C07074g,LAFE0C05336g	LADA0D00782g	LANO0F00936g	LAMI0D10088g	SAKL0A05236g,SAKL0A07106g	YGL089C,YPL187W	MF(ALPHA)2,MF(ALPHA)1	Mating pheromone alpha-factor, made by alpha cells | Mating pheromone alpha-factor, made by alpha cells	extracellular region (x2)	other (x2)	response to chemical stimulus (x2) | signaling (x2) | conjugation (x2)	-	0	0	0	0	0	0	0	0	0	0	-	-	-	-	-	-	-	-	-	-
221	2	1	1	1	3	2	1	1	1	1	1	LAWA0H12002g,LAWA0H11980g	KLTH0H13860g	LAME0E11782g	LAFA0G15962g	LACI0C02894g,LACI0C02938g,LACI0C02916g	LAFE0F11408g,LAFE0F11430g	LADA0H17678g	LANO0G15984g	LAMI0E06546g	SAKL0D10604g	YCR020C	PET18	Protein of unknown function, has weak similarity to proteins involved in thiamin metabolism	cytoplasm (x1)	unknown (x1)	vitamin metabolic process (x1)	-	0	0	0	0	0	0	0	0	0	0	-	-	-	-	-	-	-	-	-	-
222	1	1	3	1	1	1	2	0	1	1	0	LAWA0H12728g	KLTH0G19646g	LAME0C00166g,LAME0H21132g,LAME0A00210g	LAFA0F12376g	LACI0C03642g	LAFE0F12123g	LADA0F00408g,LADA0G00144g	-	LAMI0B06964g	SAKL0D11528g	-	-	-	-	-	-	-	0	0	1	0	0	0	1	1	0	0	-	-	LAME0B08174g	-	-	-	LADA0D11474g	LANO0G16710g	-	-
223	1	1	1	1	1	2	1	1	1	1	0	LAWA0B00518g	KLTH0E00638g	LAME0D00276g	LAFA0D17216g	LACI0G00276g	LAFE0A08394g,LAFE0B04874g	LADA0A00298g	LANO0H25004g	LAMI0B00540g	SAKL0D15114g	-	-	-	-	-	-	-	0	0	3	0	0	0	0	0	0	1	-	-	LAME0C00144g,LAME0B08196g,LAME0H21154g	-	-	-	-	-	-	SAKL0F00308pg
224	1	1	1	1	2	2	1	1	1	2	2	LAWA0A00738g	KLTH0C11330g	LAME0D10748g	LAFA0B07668g	LACI0H01464g,LACI0E00694g	LAFE0B01596g,LAFE0E00628g	LADA0B10484g	LANO0A06810g	LAMI0B07998g	SAKL0F12298g,SAKL0E01078g	YBL063W,YEL061C	KIP1,CIN8	Kinesin-related motor protein required for mitotic spindle assembly, chromosome segregation, and 2 micron plasmid partitioning | Kinesin motor protein involved in mitotic spindle assembly and chromosome segregation	cytoplasm (x1) | microtubule organizing center (x1) | nucleus (x2) | mitochondrion (x1) | cytoskeleton (x1) | chromosome (x2)	other (x1) | structural molecule activity (x1)	mitotic cell cycle (x2) | cytoskeleton organization (x2) | chromosome segregation (x1) | organelle fission (x2)	-	0	0	0	0	0	0	0	0	0	0	-	-	-	-	-	-	-	-	-	-
225	0	2	2	1	1	1	2	2	1	1	1	-	KLTH0B00176g,KLTH0G19624g	LAME0C06282g,LAME0B00122g	LAFA0C05248g	LACI0H14202g	LAFE0H10792g	LADA0A04632g,LADA0C12992g	LANO0H25202g,LANO0F03466g	LAMI0H12112g	SAKL0H18612g	YER152C	Unknown name	Protein with 2-aminoadipate transaminase activity	cytoplasm (x1) | nucleus (x1)	other (x1)	unknown (x1)	-	0	0	1	0	0	0	0	0	0	0	-	-	LAME0A00100g	-	-	-	-	-	-	-
226	1	1	1	1	1	1	2	1	2	1	3	LAWA0G02014g	KLTH0F08030g	LAME0H02102g	LAFA0G07536g	LACI0H09252g	LAFE0H05776g	LADA0G00298g,LADA0C00474g	LANO0G07514g	LAMI0H19196g,LAMI0B08944g	SAKL0H13222g	YDR038C,YDR039C,YDR040C	ENA5,ENA2,ENA1	Protein with similarity to P-type ATPase sodium pumps, member of the Na+ efflux ATPase family | P-type ATPase sodium pump, involved in Na+ efflux to allow salt tolerance | P-type ATPase sodium pump, involved in Na+ and Li+ efflux to allow salt tolerance	mitochondrion (x1) | cytoplasm (x3) | plasma membrane (x1) | membrane (x3)	transmembrane transporter activity (x3) | ATPase activity (x3)	ion transport (x3) | response to osmotic stress (x1) | response to starvation (x1) | transmembrane transport (x3)	-	0	0	0	0	0	0	0	0	0	0	-	-	-	-	-	-	-	-	-	-
227	1	1	1	2	1	1	3	2	1	0	1	LAWA0G00232g	KLTH0C00220g	LAME0C09560g	LAFA0D07954g,LAFA0C10660g	LACI0D07206g	LAFE0A06942g	LADA0D13146g,LADA0A00188g,LADA0G01266g	LANO0G16644g,LANO0D11188g	LAMI0A08768g	-	YIR042C	Unknown name	Putative protein of unknown function	unknown (x1)	unknown (x1)	unknown (x1)	-	0	0	1	0	0	0	0	0	0	0	-	-	LAME0F08878g	-	-	-	-	-	-	-
228	1	1	1	1	1	2	1	1	2	1	2	LAWA0E08372g	KLTH0D08646g	LAME0H00210g	LAFA0C00276g	LACI0E03356g	LAFE0E03180g,LAFE0F06964g	LADA0E14972g	LANO0H13146g	LAMI0E05160g,LAMI0D13366g	SAKL0B11242g	YMR034C,YDR182W-A	Unknown name,Unknown name	Putative transporter, member of the SLC10 carrier family | Putative protein of unknown function	unknown (x1) | membrane (x1)	unknown (x1) | other (x1)	unknown (x2)	-	0	0	1	0	0	0	0	0	0	0	-	-	LAME0F20230g	-	-	-	-	-	-	-
229	1	1	1	1	1	1	1	1	1	1	5	LAWA0F13278g	KLTH0H14960g	LAME0E12772g	LAFA0G16930g	LACI0F13102g	LAFE0A03862g	LADA0B02190g	LANO0G17062g	LAMI0C09208g	SAKL0G08734g	YDR321W,YLR160C,YLR158C,YLR157C,YLR155C	ASP1,ASP3-4,ASP3-3,ASP3-2,ASP3-1	Cytosolic L-asparaginase, involved in asparagine catabolism | Cell-wall L-asparaginase II involved in asparagine catabolism | Cell-wall L-asparaginase II involved in asparagine catabolism | Cell-wall L-asparaginase II involved in asparagine catabolism | Cell-wall L-asparaginase II involved in asparagine catabolism	cytoplasm (x1) | other (x1) | nucleus (x1) | endoplasmic reticulum (x1) | endomembrane system (x4)	hydrolase activity, acting on carbon-nitrogen (but not peptide) bonds (x5)	response to starvation (x5) | cellular amino acid metabolic process (x4)	-	0	0	0	0	0	0	0	0	0	0	-	-	-	-	-	-	-	-	-	-
230	2	1	1	1	1	1	1	1	1	1	2	LAWA0D01398g,LAWA0E00254g	KLTH0D17094g	LAME0E13718g	LAFA0F06480g	LACI0G00650g	LAFE0A00430g	LADA0C00232g	LANO0B00474g	LAMI0C03268g	SAKL0B12496g	YHR208W,YJR148W	BAT1,BAT2	Mitochondrial branched-chain amino acid (BCAA) aminotransferase | Cytosolic branched-chain amino acid (BCAA) aminotransferase	mitochondrion (x2) | cytoplasm (x1) | nucleus (x1)	other (x2)	cellular amino acid metabolic process (x2)	-	0	0	1	0	0	0	0	0	0	1	-	-	LAME0C00298g	-	-	-	-	-	-	SAKL0G09064pg
231	1	1	1	1	1	1	1	1	1	1	5	LAWA0D02498g	KLTH0D15906g	LAME0E08460g	LAFA0G12772g	LACI0G02564g	LAFE0A02454g	LADA0H14268g	LANO0G12838g	LAMI0H01596g	SAKL0G17050g	YML056C,YHR216W,YLR432W,YAR073W,YAR075W	IMD4,IMD2,IMD3,IMD1,Unknown name	Inosine monophosphate dehydrogenase | Inosine monophosphate dehydrogenase, catalyzes the rate-limiting step in GTP biosynthesis, expression is induced by mycophenolic acid resulting in resistance to the drug, expression is repressed by nutrient limitatio | Inosine monophosphate dehydrogenase | Nonfunctional protein with homology to IMP dehydrogenase | Non-functional protein with homology IMP dehy…	cytoplasm (x2) | unknown (x1) | plasma membrane (x3) | chromosome (x1) | membrane (x1)	unknown (x2) | oxidoreductase activity (x5)	nucleobase-containing small molecule metabolic process (x3) | unknown (x2)	YAR073W,YAR075W	0	0	0	0	0	0	0	0	0	0	-	-	-	-	-	-	-	-	-	-
232	0	1	1	1	1	2	1	2	1	1	1	-	KLTH0E16764g	LAME0H07162g	LAFA0E09890g	LACI0G12838g	LAFE0G14708g,LAFE0A01816g	LADA0D03994g	LANO0C00430g,LANO0E08218g	LAMI0D08152g	SAKL0H09350g	YPL092W	SSU1	Plasma membrane sulfite pump involved in sulfite metabolism and required for efficient sulfite efflux	plasma membrane (x1) | membrane (x1)	transmembrane transporter activity (x1)	ion transport (x1)	-	3	0	0	0	0	0	0	0	0	0	LAWA0F12508g,LAWA0A00606g,LAWA0A00188g	-	-	-	-	-	-	-	-	-
233	1	1	1	2	2	1	1	2	1	1	1	LAWA0E07954g	KLTH0D08250g	LAME0H12024g	LAFA0C07338g,LAFA0C07382g	LACI0H18778g,LACI0H18844g	LAFE0F07338g	LADA0G08702g	LANO0H12706g,LANO0H12618g	LAMI0C10924g	SAKL0D13794g	YKL060C	FBA1	Fructose 1,6-bisphosphate aldolase, required for glycolysis and gluconeogenesis	mitochondrion (x1) | cytoplasm (x1)	lyase activity (x1)	carbohydrate metabolic process (x1) | generation of precursor metabolites and energy (x1)	-	0	0	0	0	0	0	0	1	0	0	-	-	-	-	-	-	-	LANO0H12662g	-	-
234	1	1	1	1	3	1	1	1	1	1	2	LAWA0E01728g	KLTH0D01804g	LAME0B01596g	LAFA0C09318g	LACI0G17590g,LACI0A00496g,LACI0D00364g	LAFE0D11518g	LADA0F07734g	LANO0C01794g	LAMI0F06084g	SAKL0B10538g	YOR337W,YFR057W	TEA1,Unknown name	Ty1 enhancer activator required for full levels of Ty enhancer-mediated transcription | Putative protein of unknown function	nucleus (x1) | unknown (x1)	DNA binding (x1) | unknown (x1)	other (x1) | unknown (x1)	-	0	0	0	0	0	0	0	0	0	0	-	-	-	-	-	-	-	-	-	-
235	1	0	1	1	1	1	0	1	1	4	2	LAWA0E00782g	-	LAME0B00716g	LAFA0C10198g	LACI0G18514g	LAFE0D12486g	-	LANO0C00826g	LAMI0F05182g	SAKL0D14520g,SAKL0D14542g,SAKL0B01848g,SAKL0B01870g	YOR363C,YAL051W	PIP2,OAF1	Autoregulatory oleate-specific transcriptional activator of peroxisome proliferation, contains Zn(2)-Cys(6) cluster domain, forms heterodimer with Oaf1p, binds oleate response elements (OREs), activates beta-oxidation genes | Oleate-activated transcription factor	nucleus (x1) | membrane (x2)	DNA binding (x2) | nucleic acid binding transcription factor activity (x2)	response to chemical stimulus (x2) | transcription from RNA polymerase II promoter (x2) | lipid metabolic process (x2)	-	0	0	0	0	0	0	0	0	0	1	-	-	-	-	-	-	-	-	-	SAKL0F16368pg
236	1	1	1	1	2	2	1	1	1	2	1	LAWA0C11694g	KLTH0B02816g	LAME0C02542g	LAFA0B02212g	LACI0A03378g,LACI0A03356g	LAFE0A05776g,LAFE0A05754g	LADA0D10660g	LANO0E14862g	LAMI0H09340g	SAKL0G12232g,SAKL0G12254g	YNR055C	HOL1	Putative transporter in the major facilitator superfamily	mitochondrion (x1) | cytoplasm (x1) | plasma membrane (x1) | membrane (x1)	transmembrane transporter activity (x1)	ion transport (x1)	-	0	0	0	0	0	0	0	0	0	0	-	-	-	-	-	-	-	-	-	-
237	2	1	1	1	1	1	1	1	1	1	3	LAWA0E00320g,LAWA0B00364g	KLTH0G18986g	LAME0A07624g	LAFA0A00694g	LACI0H00650g	LAFE0B00826g	LADA0C11826g	LANO0D10616g	LAMI0G17304g	SAKL0B00814g	YLR070C,YDL246C,YJR159W	XYL2,SOR2,SOR1	Xylitol dehydrogenase, converts xylitol to D-xylulose | Protein of unknown function | Sorbitol dehydrogenase	unknown (x3)	oxidoreductase activity (x3)	carbohydrate metabolic process (x3)	-	0	0	0	0	0	0	0	0	0	0	-	-	-	-	-	-	-	-	-	-
238	1	1	1	1	2	2	1	1	2	2	0	LAWA0F03972g	KLTH0C04796g	LAME0E02432g	LAFA0D03928g	LACI0F10308g,LACI0E05336g	LAFE0D01574g,LAFE0E05314g	LADA0H06194g	LANO0F13300g	LAMI0G06040g,LAMI0G00584g	SAKL0H23804g,SAKL0D02486g	-	-	-	-	-	-	-	0	0	0	0	0	0	0	0	0	0	-	-	-	-	-	-	-	-	-	-
239	1	1	1	1	1	1	1	1	1	1	4	LAWA0C11980g	KLTH0B02574g	LAME0C02278g	LAFA0B01970g	LACI0A03642g	LAFE0A05512g	LADA0D10880g	LANO0E15104g	LAMI0H09560g	SAKL0G11968g	YFL058W,YDL244W,YNL332W,YJR156C	THI5,THI13,THI12,THI11	Protein involved in synthesis of the thiamine precursor hydroxymethylpyrimidine (HMP) | Protein involved in synthesis of the thiamine precursor hydroxymethylpyrimidine (HMP) | Protein involved in synthesis of the thiamine precursor hydroxymethylpyrimidine (HMP) | Protein involved in synthesis of the thiamine precursor hydroxymethylpyrimidine (HMP)	unknown (x4)	unknown (x4)	vitamin metabolic process (x4)	-	0	0	0	0	0	0	0	0	0	0	-	-	-	-	-	-	-	-	-	-
240	1	1	1	1	1	1	1	1	1	2	3	LAWA0F13608g	KLTH0E14300g	LAME0F02520g	LAFA0F16908g	LACI0G13938g	LAFE0G15874g	LADA0D02542g	LANO0E07118g	LAMI0E08878g	SAKL0B06512g,SAKL0F02706g	YBR082C,YDR059C,YOR339C	UBC4,UBC5,UBC11	Ubiquitin-conjugating enzyme (E2) | Ubiquitin-conjugating enzyme | Ubiquitin-conjugating enzyme most similar in sequence to Xenopus ubiquitin-conjugating enzyme E2-C, but not a true functional homolog of this E2	cytoplasm (x1) | other (x2)	ligase activity (x3) | small conjugating protein binding (x1)	protein modification by small protein conjugation or removal (x3) | proteolysis involved in cellular protein catabolic process (x1)	-	0	0	0	0	0	0	0	0	0	0	-	-	-	-	-	-	-	-	-	-
241	1	1	1	1	1	1	1	1	1	2	3	LAWA0C08020g	KLTH0B06578g	LAME0F17128g	LAFA0F10770g	LACI0H07492g	LAFE0H03994g	LADA0E02762g	LANO0H03378g	LAMI0B00474g	SAKL0G08096g,SAKL0E12496g	YMR316W,YNL165W,YER186C	DIA1,Unknown name,Unknown name	Protein of unknown function, involved in invasive and pseudohyphal growth | Putative protein of unknown function | Putative protein of unknown function	cytoplasm (x2) | unknown (x1)	unknown (x3)	pseudohyphal growth (x2) | invasive growth in response to glucose limitation (x1) | unknown (x1)	-	0	0	0	0	0	0	0	0	0	0	-	-	-	-	-	-	-	-	-	-
242	1	1	1	1	1	1	1	1	1	2	3	LAWA0H10880g	KLTH0H12606g	LAME0E10396g	LAFA0G14708g	LACI0C01860g	LAFE0F10308g	LADA0H16292g	LANO0G14752g	LAMI0A06084g	SAKL0D09152g,SAKL0B02926g	YNR001C,YCR005C,YPR001W	CIT1,CIT2,CIT3	Citrate synthase | Citrate synthase | Dual specificity mitochondrial citrate and methylcitrate synthase	mitochondrion (x3) | cytoplasm (x3) | peroxisome (x1)	transferase activity, transferring acyl groups (x3)	cellular amino acid metabolic process (x1) | cofactor metabolic process (x2) | carbohydrate metabolic process (x2) | generation of precursor metabolites and energy (x1) | lipid metabolic process (x2) | cellular respiration (x1)	-	0	0	0	0	0	0	0	0	0	0	-	-	-	-	-	-	-	-	-	-
243	1	1	1	1	2	1	1	1	1	1	3	LAWA0E08460g	KLTH0D08734g	LAME0H12486g	LAFA0C06876g	LACI0H19328g,LACI0G22298g	LAFE0F06876g	LADA0G09120g	LANO0H13234g	LAMI0D01024g	SAKL0B11330g	YKL062W,YMR037C,YPL230W	MSN4,MSN2,USV1	Transcriptional activator | Transcriptional activator | Putative transcription factor containing a C2H2 zinc finger	cytoplasm (x2) | nucleus (x3)	DNA binding (x3) | nucleic acid binding transcription factor activity (x2)	response to chemical stimulus (x2) | response to osmotic stress (x3) | chromatin organization (x2) | response to heat (x3) | response to starvation (x2) | transcription from RNA polymerase II promoter (x2) | response to oxidative stress (x3)	-	0	0	0	0	0	0	0	0	0	0	-	-	-	-	-	-	-	-	-	-
244	1	1	1	1	1	2	1	1	1	2	2	LAWA0D03378g	KLTH0E06688g	LAME0H16138g	LAFA0D11672g	LACI0F07492g	LAFE0D04324g,LAFE0C03664g	LADA0G03752g	LANO0F08460g	LAMI0D07338g	SAKL0H24816g,SAKL0A03476g	YMR182C,YER130C	RGM1,Unknown name	Putative zinc finger DNA binding transcription factor | Protein of unknown function	nucleus (x1) | unknown (x1) | chromosome (x1)	DNA binding (x2) | nucleic acid binding transcription factor activity (x1)	transcription from RNA polymerase II promoter (x1) | unknown (x1)	-	0	0	0	0	0	0	0	0	0	0	-	-	-	-	-	-	-	-	-	-
245	1	1	1	2	1	1	2	1	1	1	1	LAWA0E13520g	KLTH0D13750g	LAME0C04918g	LAFA0F18800g,LAFA0B04588g	LACI0H21044g	LAFE0F05182g	LADA0E11672g,LADA0E11694g	LANO0H18184g	LAMI0H04830g	SAKL0F03696g	YPR127W	Unknown name	Putative pyridoxine 4-dehydrogenase	cytoplasm (x1) | nucleus (x1)	unknown (x1)	unknown (x1)	-	0	0	0	0	0	0	0	1	0	0	-	-	-	-	-	-	-	LANO0E16688g	-	-
246	2	1	1	1	1	1	1	1	1	2	2	LAWA0G14444g,LAWA0E12200g	KLTH0A04466g	LAME0F13762g	LAFA0B07052g	LACI0D00936g	LAFE0B04918g	LADA0D11386g	LANO0B06964g	LAMI0G11870g	SAKL0F08756g,SAKL0B03212g	YER065C,YPR006C	ICL1,ICL2	Isocitrate lyase, catalyzes the formation of succinate and glyoxylate from isocitrate, a key reaction of the glyoxylate cycle | 2-methylisocitrate lyase of the mitochondrial matrix, functions in the methylcitrate cycle to catalyze the conversion of 2-methylisocitrate to succinate and pyruvate	mitochondrion (x1) | cytoplasm (x1) | unknown (x1)	lyase activity (x2)	carbohydrate metabolic process (x1) | lipid metabolic process (x1)	-	0	0	0	0	0	0	0	0	0	0	-	-	-	-	-	-	-	-	-	-
247	1	1	1	1	1	1	2	1	1	1	2	LAWA0G14224g	KLTH0A04224g	LAME0G18822g	LAFA0B07316g	LACI0D01134g	LAFE0B05138g	LADA0D11694g,LADA0A04170g	LANO0B07228g	LAMI0G12112g	SAKL0F08558g	YIL051C,YER057C	MMF1,HMF1	Mitochondrial protein required for transamination of isoleucine | Member of the p14.5 protein family	mitochondrion (x2) | cytoplasm (x1) | nucleus (x2) | mitochondrial envelope (x1)	unknown (x2)	mitochondrial translation (x1) | cellular amino acid metabolic process (x1) | mitochondrion organization (x1) | unknown (x1)	-	0	0	1	0	0	0	0	0	0	0	-	-	LAME0F17502g	-	-	-	-	-	-	-
248	0	1	1	1	1	1	1	1	1	5	1	-	KLTH0E11858g	LAME0H08482g	LAFA0E11210g	LACI0G11452g	LAFE0G13322g	LADA0D05336g	LANO0E09582g	LAMI0H07294g	SAKL0H10824g,SAKL0G00132g,SAKL0G19866g,SAKL0B12826g,SAKL0G00110g	YBR158W	AMN1	Protein required for daughter cell separation, multiple mitotic checkpoints, and chromosome stability	cytoplasm (x1) | cellular bud (x1) | nucleus (x1)	other (x1)	mitotic cell cycle (x1) | regulation of cell cycle (x1) | organelle fission (x1)	-	0	0	0	0	0	0	0	0	0	0	-	-	-	-	-	-	-	-	-	-
249	0	1	1	1	1	1	1	1	1	3	1	-	KLTH0C03278g	LAME0D05006g	LAFA0C00254g	LACI0D06898g	LAFE0B11100g	LADA0H04698g	LANO0F14708g	LAMI0D00188g	SAKL0D11946g,SAKL0B00220g,SAKL0F01122g	YIL162W	SUC2	Invertase, sucrose hydrolyzing enzyme	extracellular region (x1) | cytoplasm (x1) | mitochondrion (x1)	hydrolase activity, acting on glycosyl bonds (x1)	carbohydrate metabolic process (x1) | oligosaccharide metabolic process (x1)	-	1	0	0	1	0	0	0	0	0	0	LAWA0F02366g	-	-	LAFA0F00430g	-	-	-	-	-	-
250	1	1	1	1	2	2	1	1	1	2	1	LAWA0C05006g	KLTH0F05214g	LAME0G04720g	LAFA0G04808g	LACI0E08460g,LACI0E08438g	LAFE0G05006g,LAFE0G04984g	LADA0E04852g	LANO0G04742g	LAMI0G13608g	SAKL0C05830g,SAKL0C05852g	YJL151C	SNA3	Protein involved in efficient MVB sorting of proteins to the vacuole	vacuole (x1) | cytoplasm (x1) | membrane (x1)	enzyme binding (x1)	endosomal transport (x1)	-	0	0	0	0	0	0	0	0	0	0	-	-	-	-	-	-	-	-	-	-
251	1	1	1	1	1	1	1	1	1	2	3	LAWA0A01376g	KLTH0C10670g	LAME0D10154g	LAFA0F02410g	LACI0E01398g	LAFE0E01354g	LADA0B09912g	LANO0A06238g	LAMI0B07426g	SAKL0E01892g,SAKL0E01870g	YMR006C,YMR008C,YOL011W	PLB2,PLB1,PLB3	Phospholipase B (lysophospholipase) involved in lipid metabolism | Phospholipase B (lysophospholipase) involved in lipid metabolism | Phospholipase B (lysophospholipase) involved in lipid metabolism	extracellular region (x1) | cell wall (x2) | plasma membrane (x2) | membrane (x2)	other (x3)	cellular amino acid metabolic process (x1) | lipid metabolic process (x3)	-	0	0	0	0	0	0	0	0	0	0	-	-	-	-	-	-	-	-	-	-
252	1	1	1	1	1	1	1	1	1	1	4	LAWA0B05864g	KLTH0F12496g	LAME0F07800g	LAFA0D09010g	LACI0G08856g	LAFE0G10682g	LADA0E12816g	LANO0H18998g	LAMI0E01420g	SAKL0F05434g	YIR018W,YOL029C,YOL028C,YKL109W	YAP5,Unknown name,YAP7,HAP4	Basic leucine zipper (bZIP) iron-sensing transcription factor | Putative protein of unknown function | Putative basic leucine zipper (bZIP) transcription factor | Subunit of the heme-activated, glucose-repressed Hap2p/3p/4p/5p CCAAT-binding complex, a transcriptional activator and global regulator of respiratory gene expression	nucleus (x1) | unknown (x1) | chromosome (x3)	protein binding transcription factor activity (x1) | transcription factor binding (x1) | DNA binding (x2) | unknown (x1) | nucleic acid binding transcription factor activity (x1)	generation of precursor metabolites and energy (x1) | response to chemical stimulus (x1) | cellular respiration (x1) | transcription from RNA polymerase II promoter (x2) | unknown (x3)	-	0	0	0	0	0	0	0	0	0	0	-	-	-	-	-	-	-	-	-	-
253	1	1	1	1	2	2	1	1	1	1	2	LAWA0A01596g	KLTH0C10406g	LAME0D09934g	LAFA0F02608g	LACI0E01552g,LACI0E01574g	LAFE0E01508g,LAFE0E01530g	LADA0B09736g	LANO0A06062g	LAMI0B07294g	SAKL0E02068g	YLR260W,YOR171C	LCB5,LCB4	Minor sphingoid long-chain base kinase | Sphingoid long-chain base kinase	Golgi apparatus (x2) | cytoplasm (x1) | cell cortex (x2) | endoplasmic reticulum (x1) | membrane (x2) | plasma membrane (x1)	kinase activity (x2)	response to heat (x2) | signaling (x1) | lipid metabolic process (x2)	-	0	0	0	0	0	0	0	0	0	0	-	-	-	-	-	-	-	-	-	-
254	1	1	1	1	1	1	1	1	1	1	4	LAWA0F03158g	KLTH0C04004g	LAME0G13520g	LAFA0E21594g	LACI0E06084g	LAFE0G07404g	LADA0H05402g	LANO0F14026g	LAMI0G01618g	SAKL0D01606g	YMR275C,YML111W,YNR069C,YNR068C	BUL1,BUL2,BSC5,Unknown name	Ubiquitin-binding component of the Rsp5p E3-ubiquitin ligase complex | Component of the Rsp5p E3-ubiquitin ligase complex | Protein of unknown function | Putative protein of unknown function	cytoplasm (x2) | unknown (x1) | plasma membrane (x1) | membrane (x1)	ligase activity (x2) | unknown (x2)	organelle inheritance (x2) | protein modification by small protein conjugation or removal (x1) | mitochondrion organization (x1) | unknown (x2)	-	0	0	0	0	0	0	0	0	0	0	-	-	-	-	-	-	-	-	-	-
255	2	2	2	1	0	0	2	2	2	0	0	LAWA0C03224g,LAWA0C00320g	KLTH0F03278g,KLTH0F00264g	LAME0G00100g,LAME0G03048g	LAFA0G00188g	-	-	LADA0H03158g,LADA0H00144g	LANO0G03041g,LANO0G00144g	LAMI0F03004g,LAMI0E16380g	-	-	-	-	-	-	-	-	0	0	0	1	0	0	0	0	0	0	-	-	-	LAFA0G03136g	-	-	-	-	-	-
256	2	2	1	1	1	1	1	1	1	1	2	LAWA0H03664g,LAWA0G15170g	KLTH0A05214g,KLTH0G17424g	LAME0F14818g	LAFA0G19130g	LACI0H04016g	LAFE0B04126g	LADA0F10946g	LANO0B06128g	LAMI0E10902g	SAKL0F09636g	YIL079C,YDL175C	AIR1,AIR2	Zinc knuckle protein | RNA-binding subunit of the TRAMP nuclear RNA surveillance complex	nucleolus (x2) | nucleus (x2)	nucleotidyltransferase activity (x1) | RNA binding (x2) | protein binding, bridging (x1)	RNA modification (x2) | tRNA processing (x1) | RNA catabolic process (x1)	-	0	0	0	0	0	0	0	0	0	0	-	-	-	-	-	-	-	-	-	-
257	1	1	1	1	1	1	2	1	1	1	1	LAWA0C02212g	KLTH0F02200g	LAME0G02014g	LAFA0G02102g	LACI0E11276g	LAFE0G02102g	LADA0H02102g,LADA0D13168g	LANO0G02036g	LAMI0F01970g	SAKL0C02420g	YNL274C	GOR1	Glyoxylate reductase	mitochondrion (x1) | cytoplasm (x1) | nucleus (x1)	oxidoreductase activity (x1)	other (x1)	-	0	0	0	0	0	1	1	0	0	0	-	-	-	-	-	LAFE0C00254g	LADA0B04676g	-	-	-
258	1	1	1	1	2	2	1	1	1	2	1	LAWA0B04104g	KLTH0E04686g	LAME0H18052g	LAFA0D13586g	LACI0F05490g,LACI0F14202g	LAFE0D06304g,LAFE0E09010g	LADA0H07888g	LANO0F10352g	LAMI0B04566g	SAKL0F07370g,SAKL0H25982g	YFR033C	QCR6	Subunit 6 of the ubiquinol cytochrome-c reductase complex	mitochondrion (x1) | cytoplasm (x1) | mitochondrial envelope (x1) | membrane (x1)	transmembrane transporter activity (x1) | oxidoreductase activity (x1)	generation of precursor metabolites and energy (x1) | cellular respiration (x1)	-	0	0	0	0	0	0	0	0	0	0	-	-	-	-	-	-	-	-	-	-
259	1	1	1	1	1	1	1	1	1	2	2	LAWA0F02960g	KLTH0C03806g	LAME0G13322g	LAFA0E21396g	LACI0E06304g	LAFE0G07184g	LADA0H05204g	LANO0F14224g	LAMI0G01376g	SAKL0D01386g,SAKL0C06116g	YML116W,YMR279C	ATR1,Unknown name	Multidrug efflux pump of the major facilitator superfamily | Putative boron transporter involved in boron efflux and resistance	vacuole (x1) | cytoplasm (x2) | plasma membrane (x1) | membrane (x1)	transmembrane transporter activity (x2)	ion transport (x2) | response to chemical stimulus (x1) | transmembrane transport (x2)	-	0	0	0	0	0	0	0	0	0	0	-	-	-	-	-	-	-	-	-	-
260	2	2	1	1	1	2	1	1	1	1	0	LAWA0H00562g,LAWA0G05908g	KLTH0E00440g,KLTH0B10076g	LAME0C00408g	LAFA0F12332g	LACI0A00694g	LAFE0G00188g,LAFE0D12970g	LADA0B11540g	LANO0B00342g	LAMI0D00232g	SAKL0F16522g	-	-	-	-	-	-	-	0	0	0	0	0	0	0	0	0	0	-	-	-	-	-	-	-	-	-	-
261	1	1	1	1	2	1	2	1	1	1	1	LAWA0A04236g	KLTH0C07480g	LAME0H13564g	LAFA0F05226g	LACI0E04500g,LACI0C09758g	LAFE0E04324g	LADA0B06964g,LADA0F12156g	LANO0A03312g	LAMI0C05644g	SAKL0D03586g	YDR034C	LYS14	Transcriptional activator involved in regulation of genes of the lysine biosynthesis pathway	nucleus (x1)	DNA binding (x1) | nucleic acid binding transcription factor activity (x1)	cellular amino acid metabolic process (x1) | transcription from RNA polymerase II promoter (x1)	-	0	0	0	0	0	0	0	0	0	0	-	-	-	-	-	-	-	-	-	-
262	1	2	1	1	1	1	1	1	1	1	2	LAWA0D07426g	KLTH0C10098g,KLTH0A03498g	LAME0D09648g	LAFA0F02894g	LACI0E02146g	LAFE0E01926g	LADA0B09450g	LANO0A05732g	LAMI0B06942g	SAKL0A08250g	YOR162C,YLR266C	YRR1,PDR8	Zn2-Cys6 zinc-finger transcription factor | Transcription factor	nucleus (x2)	DNA binding (x2) | nucleic acid binding transcription factor activity (x2)	response to chemical stimulus (x1) | response to oxidative stress (x1) | transcription from RNA polymerase II promoter (x2)	-	0	0	0	0	0	0	0	0	0	0	-	-	-	-	-	-	-	-	-	-
263	4	3	1	0	1	1	0	1	0	0	0	LAWA0F15500g,LAWA0E14818g,LAWA0G17964g,LAWA0E14862g	KLTH0G19382g,KLTH0C11946g,KLTH0H00154g	LAME0D00188g	-	LACI0A00452g	LAFE0G19284g	-	LANO0H05754g	-	-	-	-	-	-	-	-	-	2	0	0	0	0	0	0	0	0	0	LAWA0E00122g,LAWA0E14840g	-	-	-	-	-	-	-	-	-
264	1	1	1	1	1	1	1	1	1	2	2	LAWA0E04962g	KLTH0D04928g	LAME0G17150g	LAFA0F09912g	LACI0D11100g	LAFE0H15984g	LADA0G10066g	LANO0D07052g	LAMI0G04852g	SAKL0C03718g,SAKL0E03498g	YLR348C,YKL120W	DIC1,OAC1	Mitochondrial dicarboxylate carrier, integral membrane protein, catalyzes a dicarboxylate-phosphate exchange across the inner mitochondrial membrane, transports cytoplasmic dicarboxylates into the mitochondrial matrix | Mitochondrial inner membrane transporter, transports oxaloacetate, sulfate, thiosulfate, and isopropylmalate	mitochondrion (x2) | cytoplasm (x2) | mitochondrial envelope (x2) | membrane (x2)	transmembrane transporter activity (x2)	ion transport (x2)	-	0	0	0	0	0	0	0	0	0	0	-	-	-	-	-	-	-	-	-	-
265	1	1	1	1	1	1	1	1	1	1	3	LAWA0F13850g	KLTH0E14476g	LAME0F02718g	LAFA0F16710g	LACI0G14158g	LAFE0G16094g	LADA0D02344g	LANO0E06920g	LAMI0E09120g	SAKL0B06754g	YMR056C,YBL030C,YBR085W	AAC1,PET9,AAC3	Mitochondrial inner membrane ADP/ATP translocator | Major ADP/ATP carrier of the mitochondrial inner membrane | Mitochondrial inner membrane ADP/ATP translocator	mitochondrion (x3) | cytoplasm (x3) | mitochondrial envelope (x3) | membrane (x3)	transmembrane transporter activity (x3)	cofactor metabolic process (x3) | nucleobase-containing compound transport (x1) | ion transport (x3) | generation of precursor metabolites and energy (x1) | cellular respiration (x1) | transmembrane transport (x2)	-	0	0	0	0	0	0	0	0	0	0	-	-	-	-	-	-	-	-	-	-
266	1	1	1	1	1	1	1	1	1	1	2	LAWA0G10594g	KLTH0A02750g	LAME0A03246g	LAFA0A05160g	LACI0D02520g	LAFE0B06568g	LADA0A06590g	LANO0B02498g	LAMI0F12420g	SAKL0B02244g	YFL009W,YER066W	CDC4,RRT13	F-box protein required for G1/S and G2/M transition, associates with Skp1p and Cdc53p to form a complex, SCFCdc4, which acts as ubiquitin-protein ligase directing ubiquitination of the phosphorylated CDK inhibitor Sic1p | Putative protein of unknown function	nucleus (x1) | unknown (x1)	ligase activity (x1) | small conjugating protein binding (x1) | unknown (x1)	mitotic cell cycle (x1) | protein modification by small protein conjugation or removal (x1) | proteolysis involved in cellular protein catabolic process (x1) | unknown (x1)	-	0	0	0	0	0	0	0	1	0	0	-	-	-	-	-	-	-	LANO0B08570g	-	-
267	1	1	1	1	1	1	1	1	1	2	2	LAWA0C13476g	KLTH0B00990g	LAME0C00716g	LAFA0B00430g	LACI0A01024g	LAFE0A08042g	LADA0G00452g	LANO0E16556g	LAMI0A08570g	SAKL0A10318g,SAKL0H12892g	YJR076C,YDR218C	CDC11,SPR28	Component of the septin ring that is required for cytokinesis | Sporulation-specific homolog of the yeast CDC3/10/11/12 family of bud neck microfilament genes	site of polarized growth (x2) | cytoplasm (x2) | cell cortex (x1) | membrane (x2) | cell wall (x2) | cytoskeleton (x2) | cellular bud (x1)	structural molecule activity (x1) | lipid binding (x1) | ion binding (x2)	sporulation (x1) | regulation of protein modification process (x1) | cytokinesis (x1) | protein phosphorylation (x1)	-	0	0	0	0	0	0	0	0	0	0	-	-	-	-	-	-	-	-	-	-
268	1	1	1	1	1	1	1	1	1	2	2	LAWA0B09626g	KLTH0F16544g	LAME0D02476g	LAFA0D15038g	LACI0H23310g	LAFE0F02806g	LADA0A02564g	LANO0H22760g	LAMI0E13278g	SAKL0G01980g,SAKL0H04312g	YHR107C,YGR059W	CDC12,SPR3	Component of the septin ring that is required for cytokinesis | Sporulation-specific homolog of the yeast CDC3/10/11/12 family of bud neck microfilament genes	site of polarized growth (x2) | cytoplasm (x1) | cell cortex (x1) | membrane (x2) | cell wall (x2) | cytoskeleton (x1) | cellular bud (x1)	structural molecule activity (x1) | GTPase activity (x1) | lipid binding (x1) | ion binding (x2)	sporulation (x1) | protein phosphorylation (x1) | regulation of protein modification process (x1) | protein complex biogenesis (x1) | cytoskeleton organization (x1) | cytokinesis (x1)	-	0	0	0	0	0	0	0	0	0	0	-	-	-	-	-	-	-	-	-	-
269	1	1	1	1	2	2	1	1	1	1	1	LAWA0F11452g	KLTH0E12078g	LAME0H08262g	LAFA0E10990g	LACI0G11672g,LACI0G10088g	LAFE0G13542g,LAFE0G11958g	LADA0D05094g	LANO0E09362g	LAMI0E06722g	SAKL0H10560g	YBR208C	DUR1,2	Urea amidolyase	cytoplasm (x1)	hydrolase activity, acting on carbon-nitrogen (but not peptide) bonds (x1) | ligase activity (x1)	other (x1)	-	0	0	0	0	0	0	0	0	0	0	-	-	-	-	-	-	-	-	-	-
270	2	1	1	1	2	1	0	1	1	1	0	LAWA0B00232g,LAWA0G00144g	KLTH0H16456g	LAME0H21044g	LAFA0C10726g	LACI0A03774g,LACI0H00100g	LAFE0H17788g	-	LANO0F00166g	LAMI0G15962g	SAKL0B00154g	-	-	-	-	-	-	-	0	0	0	0	0	0	1	1	0	0	-	-	-	-	-	-	LADA0D13366g	LANO0C00188g	-	-
271	1	1	1	1	1	1	1	1	1	2	2	LAWA0D02630g	KLTH0D15774g	LAME0E08328g	LAFA0G12640g	LACI0G02696g	LAFE0A02586g	LADA0H14136g	LANO0G12706g	LAMI0H01728g	SAKL0G16896g,SAKL0E06732g	YDL114W,YLR426W	Unknown name,TDA5	Putative short-chain dehydrogenase/reductase | Putative protein of unknown function	mitochondrion (x1) | cytoplasm (x2) | membrane (x1)	unknown (x2)	response to chemical stimulus (x1) | unknown (x1)	-	0	0	0	0	0	0	0	0	0	0	-	-	-	-	-	-	-	-	-	-
272	1	1	1	1	1	1	3	1	1	1	1	LAWA0E12772g	KLTH0D13002g	LAME0F01750g	LAFA0D10462g	LACI0G05292g	LAFE0E06546g	LADA0D13300g,LADA0G05072g,LADA0A01838g	LANO0H17480g	LAMI0A03774g	SAKL0H04730g	YMR226C	Unknown name	NADP(+)-dependent dehydrogenase	cytoplasm (x1) | ribosome (x1) | nucleus (x1) | membrane (x1)	oxidoreductase activity (x1)	other (x1)	-	0	0	0	0	0	0	0	0	0	0	-	-	-	-	-	-	-	-	-	-
273	1	1	1	1	1	1	1	1	1	2	2	LAWA0D06304g	KLTH0E09548g	LAME0F17612g	LAFA0F11188g	LACI0B02014g	LAFE0C10770g	LADA0E02366g	LANO0H02960g	LAMI0G16424g	SAKL0E04862g,SAKL0A06842g	YMR136W,YCR018C	GAT2,SRD1	Protein containing GATA family zinc finger motifs | Protein involved in the processing of pre-rRNA to mature rRNA	cytoplasm (x1) | nucleus (x2)	DNA binding (x1) | nucleic acid binding transcription factor activity (x1)	rRNA processing (x1) | transcription from RNA polymerase II promoter (x1)	-	0	0	0	0	0	0	0	0	0	0	-	-	-	-	-	-	-	-	-	-
274	1	1	1	1	1	1	1	1	1	1	3	LAWA0E10264g	KLTH0D10648g	LAME0F12948g	LAFA0B06260g	LACI0G07602g	LAFE0G09274g	LADA0C07426g	LANO0H15104g	LAMI0H05930g	SAKL0H07150g	YOR229W,YOR230W,YPL139C	WTM2,WTM1,UME1	Transcriptional modulator | Transcriptional modulator involved in regulation of meiosis, silencing, and expression of RNR genes | Negative regulator of meiosis	nucleus (x1) | chromosome (x3)	protein binding transcription factor activity (x1) | nucleic acid binding transcription factor activity (x3)	protein targeting (x1) | response to heat (x1) | regulation of cell cycle (x1) | response to DNA damage stimulus (x1) | meiotic cell cycle (x1) | nuclear transport (x1) | transcription from RNA polymerase I promoter (x1) | transcription from RNA polymerase II promoter (x3)	-	0	0	0	0	0	0	0	0	0	0	-	-	-	-	-	-	-	-	-	-
275	1	1	1	1	1	1	1	1	1	3	1	LAWA0H03048g	KLTH0G18150g	LAME0E09626g	LAFA0G13938g	LACI0D08658g	LAFE0F09450g	LADA0H15456g	LANO0G13982g	LAMI0A05336g	SAKL0C01760g,SAKL0C03586g,SAKL0D08272g	YLR247C	IRC20	Putative helicase	mitochondrion (x1) | cytoplasm (x1) | nucleus (x1)	helicase activity (x1)	DNA repair (x1) | DNA recombination (x1) | response to DNA damage stimulus (x1)	-	0	0	0	0	0	0	0	0	0	0	-	-	-	-	-	-	-	-	-	-
276	1	1	1	1	2	2	1	1	1	2	0	LAWA0A02828g	KLTH0C08976g	LAME0F06040g	LAFA0F03884g	LACI0G00408g,LACI0E03026g	LAFE0H17700g,LAFE0E02828g	LADA0B08284g	LANO0A04676g	LAMI0B06018g	SAKL0H22616g,SAKL0C08888g	-	-	-	-	-	-	-	0	0	0	0	0	0	0	0	0	0	-	-	-	-	-	-	-	-	-	-
277	1	1	1	1	1	1	1	1	1	2	2	LAWA0H12530g	KLTH0H14388g	LAME0E12310g	LAFA0G16468g	LACI0C03444g	LAFE0F11936g	LADA0H18206g	LANO0G16490g	LAMI0H06700g	SAKL0D11308g,SAKL0D11286g	YJR039W,YEL025C	Unknown name,Unknown name	Putative protein of unknown function | Putative protein of unknown function	mitochondrion (x2) | cytoplasm (x1) | nucleus (x1)	unknown (x2)	unknown (x2)	-	0	0	0	0	0	0	0	0	0	0	-	-	-	-	-	-	-	-	-	-
278	1	2	1	1	1	2	1	2	1	0	1	LAWA0H01530g	KLTH0C01166g,KLTH0E15928g	LAME0E00936g	LAFA0F21660g	LACI0B05644g	LAFE0C07162g,LAFE0C07140g	LADA0H19878g	LANO0H23376g,LANO0F16776g	LAMI0G08878g	-	YOR385W	Unknown name	Putative protein of unknown function	cytoplasm (x1)	unknown (x1)	unknown (x1)	-	0	0	0	0	0	0	0	0	0	0	-	-	-	-	-	-	-	-	-	-
279	0	1	1	1	1	1	1	1	1	1	3	-	KLTH0E13926g	LAME0D09494g	LAFA0F17238g	LACI0G13608g	LAFE0G15478g	LADA0D03246g	LANO0E07470g	LAMI0E08548g	SAKL0B06094g	YOR317W,YMR246W,YIL009W	FAA1,FAA4,FAA3	Long chain fatty acyl-CoA synthetase | Long chain fatty acyl-CoA synthetase | Long chain fatty acyl-CoA synthetase, activates imported fatty acids	mitochondrial envelope (x1) | cytoplasm (x2) | unknown (x1) | endoplasmic reticulum (x1) | membrane (x1) | mitochondrion (x1) | plasma membrane (x1)	ligase activity (x3)	ion transport (x2) | lipid transport (x2) | cofactor metabolic process (x1) | lipid metabolic process (x2)	-	1	0	0	0	0	0	0	0	0	0	LAWA0F13212g	-	-	-	-	-	-	-	-	-
280	1	1	1	1	2	1	1	1	1	2	1	LAWA0H07448g	KLTH0H08976g	LAME0H02960g	LAFA0E17216g	LACI0C01046g,LACI0H15698g	LAFE0H12420g	LADA0H11364g	LANO0F04918g	LAMI0H13608g	SAKL0B12562g,SAKL0H20658g	YGR019W	UGA1	Gamma-aminobutyrate (GABA) transaminase	other (x1)	other (x1)	cellular amino acid metabolic process (x1)	-	0	0	0	0	0	0	0	0	0	0	-	-	-	-	-	-	-	-	-	-
281	1	1	1	1	1	1	1	1	1	1	3	LAWA0H10748g	KLTH0H12474g	LAME0E10264g	LAFA0G14576g	LACI0C01728g	LAFE0F10176g	LADA0H16160g	LANO0G14620g	LAMI0A05952g	SAKL0D08888g	YNL001W,YCL001W-B,YCL001W-A	DOM34,Unknown name,Unknown name	Protein that facilitates ribosomal subunit dissociation | Putative protein of unknown function | Putative protein of unknown function	cytoplasm (x2) | unknown (x1)	unknown (x2) | other (x1)	unknown (x1) | RNA catabolic process (x2)	-	0	0	0	0	0	0	0	0	0	0	-	-	-	-	-	-	-	-	-	-
282	1	1	1	1	1	1	2	1	1	1	1	LAWA0F13388g	KLTH0E14080g	LAME0D09626g	LAFA0F17106g	LACI0G13740g	LAFE0G15632g	LADA0D03092g,LADA0D02762g	LANO0E07316g	LAMI0E08680g	SAKL0B06314g	YMR250W	GAD1	Glutamate decarboxylase, converts glutamate into gamma-aminobutyric acid (GABA) during glutamate catabolism	cytoplasm (x1)	lyase activity (x1)	response to chemical stimulus (x1) | cellular amino acid metabolic process (x1) | response to oxidative stress (x1)	-	0	0	0	0	0	0	1	0	0	0	-	-	-	-	-	-	LADA0D02740g	-	-	-
283	1	1	1	1	1	1	1	2	1	1	2	LAWA0D07998g	KLTH0G06006g	LAME0H10308g	LAFA0E13036g	LACI0C04302g	LAFE0F12750g	LADA0E06744g	LANO0H10858g,LANO0H15214g	LAMI0D04434g	SAKL0G09856g	YDR300C,YHR033W	PRO1,Unknown name	Gamma-glutamyl kinase | Putative protein of unknown function	cytoplasm (x2)	kinase activity (x1) | unknown (x1)	cellular amino acid metabolic process (x1) | unknown (x1)	-	0	0	0	0	0	0	0	0	0	0	-	-	-	-	-	-	-	-	-	-
284	1	1	1	1	1	2	1	1	1	1	2	LAWA0G15214g	KLTH0A05280g	LAME0F14752g	LAFA0G19064g	LACI0H03906g	LAFE0C00188g,LAFE0B04016g	LADA0F11012g	LANO0B06062g	LAMI0E10990g	SAKL0F09768g	YDL178W,YEL071W	DLD2,DLD3	D-lactate dehydrogenase, located in the mitochondrial matrix | D-lactate dehydrogenase, part of the retrograde regulon which consists of genes whose expression is stimulated by damage to mitochondria and reduced in cells grown with glutamate as the sole nitrogen source, located in the cytoplasm	mitochondrion (x2) | cytoplasm (x1)	cytoskeletal protein binding (x1) | oxidoreductase activity (x2)	other (x2)	-	0	0	0	0	0	0	0	0	0	0	-	-	-	-	-	-	-	-	-	-
285	1	1	1	1	1	1	1	1	1	2	2	LAWA0D12420g	KLTH0G01606g	LAME0H19834g	LAFA0D01530g	LACI0C08394g	LAFE0F16886g	LADA0G15346g	LANO0D01596g	LAMI0D02652g	SAKL0F01760g,SAKL0G18920g	YGL216W,YKL079W	KIP3,SMY1	Kinesin-related motor protein involved in mitotic spindle positioning | Protein that interacts with Myo2p, proposed to be involved in exocytosis	cytoplasm (x1) | cytoskeleton (x1) | cellular bud (x1) | nucleus (x1) | site of polarized growth (x1)	other (x1) | ATPase activity (x1)	mitotic cell cycle (x1) | cytoskeleton organization (x1) | exocytosis (x1)	-	0	0	0	0	0	0	0	0	0	0	-	-	-	-	-	-	-	-	-	-
286	1	1	1	1	2	2	1	1	1	1	1	LAWA0C08328g	KLTH0B06270g	LAME0F17436g	LAFA0F11078g	LACI0H07778g,LACI0G08460g	LAFE0H04280g,LAFE0G10132g	LADA0D06370g	LANO0H03070g	LAMI0B00804g	SAKL0E12188g	YHR137W	ARO9	Aromatic aminotransferase II, catalyzes the first step of tryptophan, phenylalanine, and tyrosine catabolism	cytoplasm (x1) | nucleus (x1)	other (x1)	cellular amino acid metabolic process (x1)	-	0	0	0	0	0	0	0	0	0	0	-	-	-	-	-	-	-	-	-	-
287	1	1	1	1	1	1	1	1	1	1	3	LAWA0D12662g	KLTH0G01342g	LAME0H20076g	LAFA0D01244g	LACI0C08614g	LAFE0F17106g	LADA0G15588g	LANO0D01376g	LAMI0D02432g	SAKL0F01518g	YGL225W,YER039C,YER039C-A	VRG4,HVG1,Unknown name	Golgi GDP-mannose transporter | Protein of unknown function | Putative protein of unknown function	mitochondrion (x1) | cytoplasm (x1) | Golgi apparatus (x3) | membrane (x1)	unknown (x2) | transmembrane transporter activity (x1)	nucleobase-containing compound transport (x2) | unknown (x1)	-	0	0	0	0	0	0	0	0	0	0	-	-	-	-	-	-	-	-	-	-
288	2	2	1	1	0	1	0	1	1	1	2	LAWA0G17898g,LAWA0H00342g	KLTH0F00176g,KLTH0H16390g	LAME0A08108g	LAFA0B08350g	-	LAFE0C13916g	-	LANO0C06238g	LAMI0B03466g	SAKL0D15070g	YOR387C,YGL258W	Unknown name,VEL1	Putative protein of unknown function | Protein of unknown function	cytoplasm (x1) | unknown (x1)	unknown (x2)	unknown (x2)	-	0	0	0	0	1	0	0	0	0	0	-	-	-	-	LACI0C09692g	-	-	-	-	-
289	1	2	1	1	1	1	1	1	1	1	2	LAWA0G14356g	KLTH0A04378g,KLTH0A04356g	LAME0F13850g	LAFA0B07140g	LACI0D01002g	LAFE0B05006g	LADA0D11540g	LANO0B07052g	LAMI0G11980g	SAKL0F08690g	YIL053W,YER062C	RHR2,HOR2	Constitutively expressed glycerol-1-phosphatase | Glycerol-1-phosphatase involved in glycerol biosynthesis	cytoplasm (x2) | nucleus (x2)	phosphatase activity (x2)	response to osmotic stress (x2) | carbohydrate metabolic process (x2)	-	0	0	0	0	0	0	0	0	0	0	-	-	-	-	-	-	-	-	-	-
290	1	1	1	1	1	1	1	1	2	1	1	LAWA0G12662g	KLTH0G07436g	LAME0D07624g	LAFA0F19152g	LACI0F11892g	LAFE0A05006g	LADA0E08196g	LANO0H09384g	LAMI0D02916g,LAMI0G17920g	SAKL0G11396g	YKL150W	MCR1	Mitochondrial NADH-cytochrome b5 reductase, involved in ergosterol biosynthesis	mitochondrion (x1) | cytoplasm (x1) | mitochondrial envelope (x1) | membrane (x1)	oxidoreductase activity (x1)	response to chemical stimulus (x1) | response to oxidative stress (x1) | lipid metabolic process (x1)	-	0	0	0	1	0	0	0	0	0	0	-	-	-	LAFA0E00144g	-	-	-	-	-	-
291	1	1	1	1	1	1	2	1	1	2	1	LAWA0F02982g	KLTH0C03828g	LAME0G13344g	LAFA0E21418g	LACI0E06260g	LAFE0G07228g	LADA0H05226g,LADA0E12530g	LANO0F14202g	LAMI0G01398g	SAKL0D01430g,SAKL0H20438g	YML115C	VAN1	Component of the mannan polymerase I, which contains Van1p and Mnn9p and is involved in the first steps of mannan synthesis	cytoplasm (x1) | membrane (x1) | Golgi apparatus (x1) | endomembrane system (x1)	transferase activity, transferring glycosyl groups (x1)	protein glycosylation (x1) | carbohydrate metabolic process (x1)	-	0	0	0	0	0	0	0	0	0	0	-	-	-	-	-	-	-	-	-	-
292	1	1	1	1	1	2	1	2	1	1	1	LAWA0F11562g	KLTH0E12188g	LAME0H08152g	LAFA0E10880g	LACI0G11782g	LAFE0B02278g,LAFE0G13652g	LADA0D04984g	LANO0E09252g,LANO0A00144g	LAMI0E06832g	SAKL0H10450g	YBR204C	LDH1	Serine hydrolase	cytoplasm (x1)	other (x1)	other (x1)	-	0	0	0	0	0	0	0	0	0	0	-	-	-	-	-	-	-	-	-	-
293	1	1	2	1	1	1	1	1	1	2	1	LAWA0A11364g	KLTH0H01936g	LAME0B06458g,LAME0B06436g	LAFA0G22848g	LACI0H03070g	LAFE0B03202g	LADA0F13850g	LANO0E01882g	LAMI0E11782g	SAKL0F10582g,SAKL0C02992g	YLR214W	FRE1	Ferric reductase and cupric reductase, reduces siderophore-bound iron and oxidized copper prior to uptake by transporters	plasma membrane (x1) | membrane (x1)	oxidoreductase activity (x1)	ion transport (x1) | transmembrane transport (x1)	-	0	0	0	0	0	0	0	0	0	0	-	-	-	-	-	-	-	-	-	-
294	1	1	1	1	1	1	1	1	1	1	3	LAWA0H09296g	KLTH0H11682g	LAME0E09516g	LAFA0G13828g	LACI0D08790g	LAFE0F09274g	LADA0H15302g	LANO0G13850g	LAMI0H10242g	SAKL0D07986g	YOL015W,YJL043W,YKR015C	IRC10,Unknown name,Unknown name	Putative protein of unknown function | Putative protein of unknown function | Putative protein of unknown function	mitochondrion (x2) | cytoplasm (x1) | unknown (x1)	unknown (x3)	unknown (x3)	-	0	0	0	0	0	0	0	0	0	0	-	-	-	-	-	-	-	-	-	-
295	1	1	1	1	1	1	1	1	1	3	1	LAWA0H09736g	KLTH0H11176g	LAME0F18976g	LAFA0C01618g	LACI0D09252g	LAFE0F08812g	LADA0E01024g	LANO0H01552g	LAMI0H11056g	SAKL0D07480g,SAKL0D07458g,SAKL0D07436g	YJL047C	RTT101	Cullin subunit of a Roc1p-dependent E3 ubiquitin ligase complex with a role in anaphase progression	cytoplasm (x1) | nucleus (x1)	ligase activity (x1)	mitotic cell cycle (x1) | organelle fission (x1) | RNA catabolic process (x1) | DNA replication (x1) | regulation of organelle organization (x1) | regulation of cell cycle (x1) | response to DNA damage stimulus (x1) | proteolysis involved in cellular protein catabolic process (x1) | transposition (x1)	-	0	0	0	0	0	0	0	0	0	0	-	-	-	-	-	-	-	-	-	-
296	1	1	1	1	1	1	1	1	1	1	3	LAWA0E05556g	KLTH0D05522g	LAME0G16578g	LAFA0F09296g	LACI0D10528g	LAFE0F07426g	LADA0G10638g	LANO0D06370g	LAMI0G04258g	SAKL0E02904g	YKL104C,YMR085W,YMR084W	GFA1,Unknown name,Unknown name	Glutamine-fructose-6-phosphate amidotransferase | Putative protein of unknown function | Putative protein of unknown function	unknown (x3)	unknown (x2) | other (x1)	cell wall organization or biogenesis (x2) | carbohydrate metabolic process (x1) | unknown (x1)	-	0	0	0	0	0	0	0	0	0	0	-	-	-	-	-	-	-	-	-	-
297	1	1	1	1	1	1	1	1	1	1	3	LAWA0E05336g	KLTH0D05280g	LAME0G16820g	LAFA0F09538g	LACI0D10770g	LAFE0H15654g	LADA0G10396g	LANO0D06612g	LAMI0G04500g	SAKL0E03146g	YMR095C,YFL060C,YNL334C	SNO1,SNO3,SNO2	Protein of unconfirmed function, involved in pyridoxine metabolism | Protein of unknown function, nearly identical to Sno2p | Protein of unknown function, nearly identical to Sno3p	cytoplasm (x2) | unknown (x1)	hydrolase activity, acting on carbon-nitrogen (but not peptide) bonds (x1) | unknown (x2)	vitamin metabolic process (x3)	-	0	0	0	0	0	0	0	0	0	0	-	-	-	-	-	-	-	-	-	-
298	1	1	1	1	1	1	1	1	1	1	3	LAWA0E05314g	KLTH0D05258g	LAME0G16842g	LAFA0F09560g	LACI0D10792g	LAFE0H15676g	LADA0G10374g	LANO0D06634g	LAMI0G04522g	SAKL0E03168g	YFL059W,YNL333W,YMR096W	SNZ3,SNZ2,SNZ1	Member of a stationary phase-induced gene family | Member of a stationary phase-induced gene family | Protein involved in vitamin B6 biosynthesis	unknown (x3)	hydrolase activity, acting on carbon-nitrogen (but not peptide) bonds (x1) | other (x2)	vitamin metabolic process (x3)	-	0	0	0	0	0	0	0	0	0	0	-	-	-	-	-	-	-	-	-	-
299	1	1	1	1	1	1	1	1	1	2	2	LAWA0A01882g	KLTH0C09988g	LAME0F06832g	LAFA0F03004g	LACI0E02256g	LAFE0E02036g	LADA0B09340g	LANO0A05622g	LAMI0B06832g	SAKL0C09900g,SAKL0F10846g	YOL090W,YDL154W	MSH2,MSH5	Protein that forms heterodimers with Msh3p and Msh6p that bind to DNA mismatches to initiate the mismatch repair process | Protein of the MutS family, forms a dimer with Msh4p that facilitates crossovers between homologs during meiosis	nucleus (x1) | chromosome (x2)	DNA binding (x1) | unknown (x1) | ion binding (x1) | ATPase activity (x1)	DNA repair (x2) | DNA recombination (x1) | response to DNA damage stimulus (x1)	-	0	0	0	0	0	0	0	0	0	0	-	-	-	-	-	-	-	-	-	-
300	1	1	2	2	1	1	2	1	1	1	0	LAWA0A07448g	KLTH0G13354g	LAME0D11254g,LAME0G08460g	LAFA0B08130g,LAFA0E05336g	LACI0H12552g	LAFE0H09120g	LADA0G06766g,LADA0G00254g	LANO0C06722g	LAMI0H15896g	SAKL0H16698g	-	-	-	-	-	-	-	0	0	0	0	0	0	0	0	0	0	-	-	-	-	-	-	-	-	-	-
301	1	1	1	1	1	1	1	1	1	1	3	LAWA0F05798g	KLTH0C06666g	LAME0F11056g	LAFA0D05644g	LACI0H01332g	LAFE0B01464g	LADA0H08966g	LANO0F11386g	LAMI0D12750g	SAKL0F12496g	YER101C,YBL069W,YBL068W-A	AST2,AST1,Unknown name	Lipid raft associated protein | Lipid raft associated protein | Dubious open reading frame unlikely to encode a protein	cytoplasm (x1) | unknown (x1) | plasma membrane (x2) | Golgi apparatus (x1) | membrane (x1)	unknown (x3)	protein targeting (x1) | unknown (x2)	YBL068W-A	0	0	0	0	0	0	0	0	0	0	-	-	-	-	-	-	-	-	-	-
302	1	1	1	1	1	1	1	1	1	1	3	LAWA0C06458g	KLTH0F06732g	LAME0G06128g	LAFA0G06260g	LACI0E06920g	LAFE0G06568g	LADA0E03400g	LANO0G06128g	LAMI0G15082g	SAKL0C07634g	YOL055C,YPL258C,YPR121W	THI20,THI21,THI22	Trifunctional enzyme of thiamine biosynthesis, degradation and salvage | Hydroxymethylpyrimidine (HMP) and HMP-phosphate kinase | Protein with similarity to hydroxymethylpyrimidine phosphate kinases	cytoplasm (x2) | unknown (x1)	kinase activity (x1) | hydrolase activity, acting on carbon-nitrogen (but not peptide) bonds (x3)	vitamin metabolic process (x3)	-	0	0	0	0	0	0	0	0	0	0	-	-	-	-	-	-	-	-	-	-
303	1	1	1	1	1	2	1	1	2	1	1	LAWA0C04962g	KLTH0F05170g	LAME0G04676g	LAFA0G04764g	LACI0E08504g	LAFE0G04940g,LAFE0G04918g	LADA0E04808g	LANO0G04676g	LAMI0G13564g,LAMI0B00210g	SAKL0C05786g	YKR066C	CCP1	Mitochondrial cytochrome-c peroxidase	mitochondrion (x1) | cytoplasm (x1) | mitochondrial envelope (x1)	oxidoreductase activity (x1)	response to chemical stimulus (x1) | response to oxidative stress (x1)	-	0	0	0	0	0	0	0	0	0	0	-	-	-	-	-	-	-	-	-	-
304	1	1	1	1	1	1	1	1	1	1	3	LAWA0H07888g	KLTH0H09416g	LAME0H03422g	LAFA0E16776g	LACI0H16094g	LAFE0H12816g	LADA0H11804g	LANO0F05402g	LAMI0H14026g	SAKL0H24222g	YLR310C,YLL016W,YLL017W	CDC25,SDC25,Unknown name	Membrane bound guanine nucleotide exchange factor (GEF or GDP-release factor) | Non-essential Ras guanine nucleotide exchange factor (GEF) | Non-essential Ras guanine nucleotide exchange factor (GEF)	cytoplasm (x1) | membrane (x1) | nucleus (x1) | endoplasmic reticulum (x1) | endomembrane system (x1)	enzyme regulator activity (x1)	mitotic cell cycle (x1) | regulation of cell cycle (x1) | signaling (x1)	-	0	0	0	0	0	0	0	0	0	0	-	-	-	-	-	-	-	-	-	-
305	1	1	1	1	1	1	1	1	1	2	2	LAWA0B12530g	KLTH0F19492g	LAME0C09054g	LAFA0C02344g	LACI0F00848g	LAFE0G18646g	LADA0D00474g	LANO0F00672g	LAMI0C00672g	SAKL0C13508g,SAKL0A10076g	YGR197C,YJR015W	SNG1,Unknown name	Protein involved in resistance to nitrosoguanidine (MNNG) and 6-azauracil (6-AU) | Putative protein of unknown function	cytoplasm (x1) | plasma membrane (x1) | endoplasmic reticulum (x2) | membrane (x1)	unknown (x2)	nucleobase-containing compound transport (x1) | unknown (x1)	-	0	0	0	0	0	0	0	0	0	0	-	-	-	-	-	-	-	-	-	-
306	2	2	1	1	1	0	2	1	1	1	1	LAWA0H13938g,LAWA0H13916g	KLTH0H15840g,KLTH0H15818g	LAME0A00980g	LAFA0A07316g	LACI0F10968g	-	LADA0F00782g,LADA0F00793g	LANO0G17920g	LAMI0D13036g	SAKL0E05434g	YMR148W	OSW5	Protein of unknown function that may play a role in spore wall assembly	membrane (x1)	unknown (x1)	unknown (x1)	-	0	0	0	0	0	0	0	0	0	0	-	-	-	-	-	-	-	-	-	-
307	1	1	1	1	1	1	1	1	1	1	3	LAWA0A06898g	KLTH0G12760g	LAME0G07866g	LAFA0E04764g	LACI0H11980g	LAFE0H08526g	LADA0F02476g	LANO0C07294g	LAMI0H16424g	SAKL0H16060g	YLR110C,YDR134C,YNR044W	CCW12,Unknown name,AGA1	Cell wall mannoprotein | Hypothetical protein | Anchorage subunit of a-agglutinin of a-cells	cell wall (x2) | cellular bud (x1) | site of polarized growth (x1)	unknown (x1) | other (x1)	cell wall organization or biogenesis (x1) | response to chemical stimulus (x2) | conjugation (x2)	-	0	0	0	0	0	0	0	0	0	0	-	-	-	-	-	-	-	-	-	-
308	1	1	1	2	1	1	1	2	1	1	1	LAWA0D11364g	KLTH0H00264g	LAME0A00584g	LAFA0E21924g,LAFA0A07734g	LACI0H15302g	LAFE0H12002g	LADA0F00232g	LANO0G18404g,LANO0D02938g	LAMI0F16556g	SAKL0F04686g	YER004W	FMP52	Protein of unknown function, localized to the mitochondrial outer membrane	mitochondrion (x1) | cytoplasm (x1) | mitochondrial envelope (x1) | endoplasmic reticulum (x1) | membrane (x1)	unknown (x1)	unknown (x1)	-	0	0	0	0	0	0	0	0	0	0	-	-	-	-	-	-	-	-	-	-
309	1	1	1	1	1	1	1	1	1	2	2	LAWA0A05820g	KLTH0G14795g	LAME0G09857g	LAFA0E06766g	LACI0G10462g	LAFE0G12332g	LADA0F04456g	LANO0C05248g	LAMI0B01123g	SAKL0E14267g,SAKL0E14773g	YNL145W,YDR461W	MFA2,MFA1	Mating pheromone a-factor, made by a cells | Mating pheromone a-factor, made by a cells	extracellular region (x2)	other (x2)	response to chemical stimulus (x2) | signaling (x2) | conjugation (x2)	-	0	0	0	0	0	0	0	0	0	0	-	-	-	-	-	-	-	-	-	-
310	1	1	1	1	1	1	1	1	1	2	2	LAWA0C08614g	KLTH0B05984g	LAME0H06260g	LAFA0E09032g	LACI0G10484g	LAFE0G12354g	LADA0D07690g	LANO0E11980g	LAMI0B01112g	SAKL0E11858g,SAKL0D12496g	YHR131C,YNL144C	Unknown name,Unknown name	Putative protein of unknown function | Putative protein of unknown function	mitochondrion (x2) | cytoplasm (x1)	unknown (x2)	unknown (x2)	-	0	0	0	0	0	0	0	0	0	0	-	-	-	-	-	-	-	-	-	-
311	1	1	1	1	1	1	1	1	1	2	2	LAWA0E08856g	KLTH0D09152g	LAME0H12904g	LAFA0C06436g	LACI0H19724g	LAFE0F06480g	LADA0C08878g	LANO0H13674g	LAMI0D00628g	SAKL0E10472g,SAKL0F05170g	YNL104C,YOR108W	LEU4,LEU9	Alpha-isopropylmalate synthase (2-isopropylmalate synthase) | Alpha-isopropylmalate synthase II (2-isopropylmalate synthase)	mitochondrion (x2) | cytoplasm (x2)	transferase activity, transferring acyl groups (x2)	cellular amino acid metabolic process (x2)	-	0	0	0	0	0	0	0	0	0	0	-	-	-	-	-	-	-	-	-	-
312	1	1	1	1	1	1	1	1	1	1	3	LAWA0H04346g	KLTH0H05588g	LAME0C08152g	LAFA0C03268g	LACI0G19988g	LAFE0C06018g	LADA0A02674g	LANO0F01618g	LAMI0F07932g	SAKL0A05940g	YIR037W,YBR244W,YKL026C	HYR1,GPX2,GPX1	Thiol peroxidase | Phospholipid hydroperoxide glutathione peroxidase | Phospholipid hydroperoxide glutathione peroxidase	mitochondrial envelope (x3) | cytoplasm (x2) | membrane (x3) | nucleus (x3) | peroxisome (x1) | mitochondrion (x2)	oxidoreductase activity (x3)	peroxisome organization (x1) | response to oxidative stress (x3) | response to chemical stimulus (x3)	-	0	0	0	0	0	0	0	0	0	0	-	-	-	-	-	-	-	-	-	-
313	1	1	2	1	1	1	1	1	1	1	2	LAWA0G07536g	KLTH0B08668g	LAME0G06832g,LAME0A00342g	LAFA0E01640g	LACI0H05556g	LAFE0H02058g	LADA0B02058g	LANO0C08284g	LAMI0F15170g	SAKL0H01848g	YGR256W,YHR183W	GND2,GND1	6-phosphogluconate dehydrogenase (decarboxylating) | 6-phosphogluconate dehydrogenase (decarboxylating)	mitochondrion (x2) | cytoplasm (x1) | plasma membrane (x1) | membrane (x1)	oxidoreductase activity (x2)	response to chemical stimulus (x2) | nucleobase-containing small molecule metabolic process (x2) | carbohydrate metabolic process (x2) | cofactor metabolic process (x1) | response to oxidative stress (x1)	-	0	0	0	0	0	0	0	0	0	0	-	-	-	-	-	-	-	-	-	-
314	1	1	1	1	1	1	1	1	2	1	2	LAWA0F10022g	KLTH0E10560g	LAME0D08482g	LAFA0F18250g	LACI0H08438g	LAFE0H04940g	LADA0D06656g	LANO0E10814g	LAMI0B05182g,LAMI0D12882g	SAKL0H12342g	YDR233C,YDL204W	RTN1,RTN2	Reticulon protein | Reticulon protein	Golgi apparatus (x1) | cytoplasm (x2) | cell cortex (x2) | endoplasmic reticulum (x1) | endomembrane system (x2) | nucleus (x1) | membrane (x1) | mitochondrion (x1)	unknown (x2)	nucleus organization (x1) | other (x1) | protein complex biogenesis (x1)	-	0	0	0	0	0	0	0	0	0	0	-	-	-	-	-	-	-	-	-	-
315	1	1	1	1	1	1	2	1	1	1	1	LAWA0G17876g	KLTH0F07898g	LAME0G09604g	LAFA0E06502g	LACI0H13696g	LAFE0H10264g	LADA0F04192g,LADA0F12112g	LANO0C05512g	LAMI0H14774g	SAKL0H18040g	YDR090C	Unknown name	Putative protein of unknown function	membrane (x1)	unknown (x1)	unknown (x1)	-	1	0	0	0	0	0	0	0	0	0	LAWA0H00320g	-	-	-	-	-	-	-	-	-
316	1	1	1	1	1	1	1	1	1	1	3	LAWA0B10660g	KLTH0F17622g	LAME0H16556g	LAFA0D12134g	LACI0H24344g	LAFE0F01640g	LADA0H13850g	LANO0H23816g	LAMI0H09802g	SAKL0G00880g	YKR076W,YMR251W,YGR154C	ECM4,GTO3,GTO1	Omega class glutathione transferase | Omega class glutathione transferase | Omega-class glutathione transferase	cytoplasm (x3) | peroxisome (x1)	transferase activity, transferring alkyl or aryl (other than methyl) groups (x3)	cellular amino acid metabolic process (x3)	-	0	0	0	0	0	0	0	0	0	0	-	-	-	-	-	-	-	-	-	-
317	0	0	0	0	0	1	0	0	0	0	10	-	-	-	-	-	LAFE0D03730g	-	-	-	-	YCR018C-A,YDR034C-A,YDR366C,YPR002C-A,YOL106W,YMR046W-A,YGR122C-A,YLR334C,YOL013W-B,YER181C	Unknown name,Unknown name,Unknown name,Unknown name,Unknown name,Unknown name,Unknown name,Unknown name,Unknown name,Unknown name	Putative protein of unknown function | Putative protein of unknown function | Putative protein of unknown function | Dubious open reading frame unlikely to encode a protein, based on available experimental and comparative sequence data | Dubious open reading frame unlikely to encode a functional protein, based on available experimental and comparative sequence data | Dubious open reading frame un…	mitochondrion (x4) | cytoplasm (x1) | unknown (x6) | membrane (x1)	unknown (x10)	unknown (x10)	YCR018C-A,YPR002C-A,YOL106W,YMR046W-A,YGR122C-A,YLR334C,YOL013W-B,YER181C	0	0	0	0	0	0	0	0	0	2	-	-	-	-	-	-	-	-	-	SAKL0B00429pg,SAKL0H16005pg
318	1	1	1	1	1	1	1	1	1	1	2	LAWA0H04456g	KLTH0H05698g	LAME0C08042g	LAFA0C03400g	LACI0G19878g	LAFE0C06128g	LADA0A02806g	LANO0F01728g	LAMI0F08042g	SAKL0A06050g	YGL104C,YBR241C	VPS73,Unknown name	Mitochondrial protein | Putative transporter, member of the sugar porter family	mitochondrion (x2) | cytoplasm (x2) | vacuole (x1) | membrane (x1)	transmembrane transporter activity (x2)	protein targeting (x1) | transmembrane transport (x2)	-	0	0	0	0	0	0	0	0	0	0	-	-	-	-	-	-	-	-	-	-
319	1	1	1	1	1	1	1	1	1	2	1	LAWA0G00848g	KLTH0G07898g	LAME0D07162g	LAFA0F19592g	LACI0A03664g	LAFE0A05490g	LADA0E08636g	LANO0H08944g	LAMI0F08878g	SAKL0G11902g,SAKL0C02024g	YLR014C	PPR1	Zinc finger transcription factor containing a Zn(2)-Cys(6) binuclear cluster domain, positively regulates transcription of URA1, URA3, URA4, and URA10, which are involved in de novo pyrimidine biosynthesis, in response to pyrimidine starvation	nucleus (x1)	DNA binding (x1) | ion binding (x1) | nucleic acid binding transcription factor activity (x1)	transcription from RNA polymerase II promoter (x1)	-	0	0	0	0	0	0	0	0	0	0	-	-	-	-	-	-	-	-	-	-
320	0	1	1	1	1	1	1	1	1	1	1	-	KLTH0G15180g	LAME0G10286g	LAFA0E15720g	LACI0B04764g	LAFE0C08086g	LADA0F04896g	LANO0C04830g	LAMI0C06238g	SAKL0A08074g	YLR278C	Unknown name	Zinc-cluster protein	nucleus (x1)	DNA binding (x1)	unknown (x1)	-	1	0	0	0	1	0	0	0	0	0	LAWA0A05424g	-	-	-	LACI0A01376g	-	-	-	-	-
321	1	1	1	1	1	1	1	1	1	1	2	LAWA0A01838g	KLTH0C10032g	LAME0F06876g	LAFA0F02960g	LACI0E02212g	LAFE0E01992g	LADA0B09384g	LANO0A05666g	LAMI0B06876g	SAKL0C09944g	YOL089C,YBR150C	HAL9,TBS1	Putative transcription factor containing a zinc finger | Putative protein of unknown function	mitochondrion (x2) | cytoplasm (x2) | nucleus (x2)	DNA binding (x2)	response to osmotic stress (x1) | transcription from RNA polymerase II promoter (x1) | unknown (x1)	-	0	0	0	0	0	0	0	0	0	0	-	-	-	-	-	-	-	-	-	-
322	1	1	1	1	1	1	1	1	1	1	2	LAWA0D04654g	KLTH0E07854g	LAME0F01596g	LAFA0D10572g	LACI0F08724g	LAFE0D03092g	LADA0G04852g	LANO0F07316g	LAMI0D06216g	SAKL0D01100g	YBL005W,YGL013C	PDR3,PDR1	Transcriptional activator of the pleiotropic drug resistance network | Transcription factor that regulates the pleiotropic drug response	cytoplasm (x1) | nucleus (x2)	DNA binding (x1) | nucleic acid binding transcription factor activity (x2)	response to chemical stimulus (x2) | transcription from RNA polymerase II promoter (x2)	-	0	0	0	0	0	0	0	0	0	0	-	-	-	-	-	-	-	-	-	-
323	1	1	1	1	1	1	0	1	1	3	0	LAWA0D01706g	KLTH0E01474g	LAME0E09472g	LAFA0G13784g	LACI0F15434g	LAFE0E10198g	-	LANO0D11056g	LAMI0C08834g	SAKL0C14058g,SAKL0E00264g,SAKL0B00132g	-	-	-	-	-	-	-	0	0	0	0	0	0	0	1	0	0	-	-	-	-	-	-	-	LANO0H25356g	-	-
324	1	1	1	1	1	1	1	1	1	2	1	LAWA0C05050g	KLTH0F05258g	LAME0G04764g	LAFA0G04852g	LACI0E08394g	LAFE0G05050g	LADA0E04896g	LANO0G04786g	LAMI0G13652g	SAKL0G07634g,SAKL0C05918g	YKR064W	OAF3	Putative transcriptional repressor with Zn(2)-Cys(6) finger	mitochondrion (x1) | cytoplasm (x1) | nucleus (x1)	nucleic acid binding transcription factor activity (x1)	response to chemical stimulus (x1) | transcription from RNA polymerase II promoter (x1)	-	0	0	0	0	0	0	0	0	0	0	-	-	-	-	-	-	-	-	-	-
325	1	1	1	1	1	1	1	1	1	1	2	LAWA0G01882g	KLTH0F07854g	LAME0H01948g	LAFA0G07360g	LACI0H09120g	LAFE0H05622g	LADA0C00320g	LANO0G07294g	LAMI0H19350g	SAKL0H13024g	YDR213W,YLR228C	UPC2,ECM22	Sterol regulatory element binding protein | Sterol regulatory element binding protein	cytoplasm (x2) | nucleus (x2) | membrane (x2)	DNA binding (x2) | nucleic acid binding transcription factor activity (x2)	response to chemical stimulus (x2) | transcription from RNA polymerase II promoter (x2) | lipid metabolic process (x2) | regulation of transport (x1) | lipid transport (x2) | transmembrane transport (x2)	-	0	0	0	0	0	0	0	0	0	0	-	-	-	-	-	-	-	-	-	-
326	1	1	1	1	1	1	1	1	2	1	1	LAWA0G03620g	KLTH0F09702g	LAME0E04830g	LAFA0G09164g	LACI0F14862g	LAFE0E09648g	LADA0C02102g	LANO0G09164g	LAMI0B05996g,LAMI0E02564g	SAKL0E06336g	YMR168C	CEP3	Essential kinetochore protein, component of the CBF3 complex that binds the CDEIII region of the centromere	nucleus (x1) | chromosome (x1)	DNA binding (x1)	mitotic cell cycle (x1) | organelle fission (x1) | regulation of organelle organization (x1) | regulation of cell cycle (x1) | protein complex biogenesis (x1) | cytoskeleton organization (x1)	-	0	0	0	0	0	0	0	0	0	0	-	-	-	-	-	-	-	-	-	-
327	1	1	1	1	1	1	1	1	1	1	1	LAWA0G00430g	KLTH0A00374g	LAME0A00474g	LAFA0A07822g	LACI0A00716g	LAFE0F03598g	LADA0F15456g	LANO0A00430g	LAMI0A08702g	SAKL0A00176g	YKL070W	Unknown name	Putative protein of unknown function	mitochondrion (x1) | cytoplasm (x1)	unknown (x1)	unknown (x1)	-	0	0	0	1	0	0	0	0	0	0	-	-	-	LAFA0E22012g	-	-	-	-	-	-
328	1	1	1	2	1	1	1	1	1	1	1	LAWA0A03730g	KLTH0C08074g	LAME0F05094g	LAFA0F00298g,LAFA0F04830g	LACI0E04016g	LAFE0E03818g	LADA0B07316g	LANO0A03730g	LAMI0H07844g	SAKL0D04070g	YBR043C	QDR3	Multidrug transporter of the major facilitator superfamily	plasma membrane (x1) | membrane (x1)	transmembrane transporter activity (x1)	response to chemical stimulus (x1) | transmembrane transport (x1)	-	0	0	0	0	0	0	0	0	0	0	-	-	-	-	-	-	-	-	-	-
329	1	1	1	1	1	1	1	1	1	2	1	LAWA0A12046g	KLTH0H01254g	LAME0B07162g	LAFA0G23552g	LACI0H02344g	LAFE0B02476g	LADA0E14356g	LANO0E01178g	LAMI0E14796g	SAKL0F11374g,SAKL0A00880g	YDL168W	SFA1	Bifunctional alcohol dehydrogenase and formaldehyde dehydrogenase	mitochondrion (x1) | cytoplasm (x1)	oxidoreductase activity (x1)	cellular amino acid metabolic process (x1)	-	0	0	0	0	0	0	0	0	0	0	-	-	-	-	-	-	-	-	-	-
330	1	1	1	1	1	1	1	1	1	1	2	LAWA0E10088g	KLTH0D10472g	LAME0F13124g	LAFA0B06436g	LACI0G07778g	LAFE0G09450g	LADA0C07624g	LANO0H14928g	LAMI0H06128g	SAKL0H07326g	YOR222W,YPL134C	ODC2,ODC1	Mitochondrial inner membrane transporter | Mitochondrial inner membrane transporter	mitochondrion (x2) | cytoplasm (x2) | mitochondrial envelope (x2) | membrane (x2)	transmembrane transporter activity (x2)	other (x2)	-	0	0	0	0	0	0	0	0	0	0	-	-	-	-	-	-	-	-	-	-
331	1	1	1	1	1	1	1	1	1	1	2	LAWA0B06084g	KLTH0F12804g	LAME0F08020g	LAFA0D08812g	LACI0G09076g	LAFE0G10902g	LADA0E13014g	LANO0H19218g	LAMI0E05468g	SAKL0F05038g	YEL006W,YIL006W	YEA6,YIA6	Putative mitochondrial NAD+ transporter | Mitochondrial NAD+ transporter	mitochondrion (x2) | cytoplasm (x2) | mitochondrial envelope (x2) | membrane (x2)	other (x1) | transmembrane transporter activity (x1)	ion transport (x1) | nucleobase-containing compound transport (x2) | transmembrane transport (x2)	-	0	0	0	0	0	0	0	0	0	0	-	-	-	-	-	-	-	-	-	-
332	1	1	1	1	1	1	1	1	1	1	2	LAWA0C05512g	KLTH0F05786g	LAME0G05226g	LAFA0G05336g	LACI0E07844g	LAFE0G05600g	LADA0E05358g	LANO0G05248g	LAMI0G14114g	SAKL0C06512g	YJL133W,YKR052C	MRS3,MRS4	Iron transporter, mediates Fe2+ transport across inner mito membrane | Iron transporter of the mitochondrial carrier family	mitochondrion (x2) | cytoplasm (x2) | mitochondrial envelope (x1) | membrane (x2)	transmembrane transporter activity (x2)	ion transport (x1) | RNA splicing (x2)	-	0	0	0	0	0	0	0	0	0	0	-	-	-	-	-	-	-	-	-	-
333	1	1	1	1	1	1	1	1	1	1	2	LAWA0F14862g	KLTH0E15576g	LAME0G19152g	LAFA0F01882g	LACI0B01310g	LAFE0B11606g	LADA0D12002g	LANO0B07558g	LAMI0E11958g	SAKL0D04796g	YJL112W,YKR036C	MDV1,CAF4	Peripheral protein of cytosolic face of mitochondrial outer membrane | WD40 repeat-containing protein associated with the CCR4-NOT complex	mitochondrion (x2) | cytoplasm (x1) | mitochondrial envelope (x1) | membrane (x2)	unknown (x1) | small conjugating protein binding (x1)	peroxisome organization (x2) | mitochondrion organization (x2) | organelle fission (x2) | transcription from RNA polymerase II promoter (x1)	-	0	0	0	0	0	0	0	0	0	0	-	-	-	-	-	-	-	-	-	-
334	1	1	1	1	1	1	1	1	1	1	2	LAWA0E04984g	KLTH0D04950g	LAME0G17128g	LAFA0F09890g	LACI0D11078g	LAFE0H15962g	LADA0G10088g	LANO0D07030g	LAMI0G04698g	SAKL0E03520g	YKL121W,YMR102C	DGR2,Unknown name	Protein of unknown function | Protein of unknown function	unknown (x2)	unknown (x2)	unknown (x2)	-	0	0	0	0	0	0	0	0	0	0	-	-	-	-	-	-	-	-	-	-
335	1	1	1	1	1	1	1	1	1	2	1	LAWA0B08284g	KLTH0F15070g	LAME0F10154g	LAFA0D06546g	LACI0H21968g	LAFE0F04214g	LADA0B04214g	LANO0H21462g	LAMI0H03884g	SAKL0G03498g,SAKL0A02882g	YDR390C	UBA2	Subunit of a heterodimeric nuclear SUMO activating enzyme (E1) with Aos1p	nucleus (x1)	other (x1)	protein modification by small protein conjugation or removal (x1)	-	0	0	0	0	0	0	0	0	0	0	-	-	-	-	-	-	-	-	-	-
336	1	1	1	1	1	1	1	1	1	1	2	LAWA0E06634g	KLTH0D06666g	LAME0G15500g	LAFA0F08196g	LACI0H17546g	LAFE0H14290g	LADA0G11716g	LANO0D05292g	LAMI0F10902g	SAKL0A09328g	YHR003C,YKL027W	TCD1,TCD2	tRNA threonylcarbamoyladenosine dehydratase | tRNA threonylcarbamoyladenosine dehydratase	mitochondrion (x2) | cytoplasm (x2) | mitochondrial envelope (x2) | membrane (x2)	lyase activity (x2)	RNA modification (x2) | tRNA processing (x2)	-	0	0	0	0	0	0	0	0	0	0	-	-	-	-	-	-	-	-	-	-
337	1	1	1	1	1	1	1	1	1	1	2	LAWA0C13212g	KLTH0B01276g	LAME0C01662g	LAFA0B01354g	LACI0A01508g	LAFE0A07734g	LADA0F09494g	LANO0E16270g	LAMI0A08306g	SAKL0G14784g	YLR043C,YGR209C	TRX1,TRX2	Cytoplasmic thioredoxin isoenzyme | Cytoplasmic thioredoxin isoenzyme	mitochondrion (x2) | cytoplasm (x1) | vacuole (x1) | mitochondrial envelope (x2)	oxidoreductase activity (x2)	response to chemical stimulus (x2) | vacuole organization (x2) | organelle inheritance (x2) | membrane fusion (x2) | Golgi vesicle transport (x2) | response to oxidative stress (x2)	-	0	0	0	0	0	0	0	0	0	0	-	-	-	-	-	-	-	-	-	-
338	1	1	1	1	1	1	1	1	1	1	2	LAWA0A06392g	KLTH0G14234g	LAME0G09296g	LAFA0E06172g	LACI0H13388g	LAFE0H09956g	LADA0F03840g	LANO0C05842g	LAMI0H15082g	SAKL0H17710g	YER174C,YDR098C	GRX4,GRX3	Glutathione-dependent oxidoreductase | Glutathione-dependent oxidoreductase	cytoplasm (x1) | nucleus (x2)	oxidoreductase activity (x2)	response to chemical stimulus (x2) | cytoskeleton organization (x2) | response to oxidative stress (x2) | cellular ion homeostasis (x2)	-	0	0	0	0	0	0	0	0	0	0	-	-	-	-	-	-	-	-	-	-
339	1	1	1	1	1	1	1	1	1	1	2	LAWA0C01156g	KLTH0F01100g	LAME0G00936g	LAFA0G00936g	LACI0E12288g	LAFE0G01002g	LADA0H00958g	LANO0G00958g	LAMI0F00958g	SAKL0C01100g	YCL043C,YDR518W	PDI1,EUG1	Protein disulfide isomerase | Protein disulfide isomerase of the endoplasmic reticulum lumen	cytoplasm (x2) | endoplasmic reticulum (x2)	isomerase activity (x2) | oxidoreductase activity (x2)	protein folding (x2)	-	0	0	0	0	0	0	0	0	0	0	-	-	-	-	-	-	-	-	-	-
340	1	1	1	1	1	1	1	1	1	1	2	LAWA0C12970g	KLTH0B01562g	LAME0C01332g	LAFA0B01046g	LACI0A01772g	LAFE0A07470g	LADA0F09758g	LANO0E16028g	LAMI0A08020g	SAKL0G14498g	YGR203W,YPR200C	YCH1,ARR2	Phosphatase with sequence similarity to Cdc25p, Arr2p and Mih1p | Arsenate reductase required for arsenate resistance	nucleus (x1) | cytoplasm (x1) | unknown (x1)	oxidoreductase activity (x1) | phosphatase activity (x1)	response to chemical stimulus (x1) | other (x1)	-	0	0	0	0	0	0	0	0	0	0	-	-	-	-	-	-	-	-	-	-
341	1	1	1	1	1	1	1	1	1	1	2	LAWA0C10506g	KLTH0B03938g	LAME0C03642g	LAFA0B03312g	LACI0A02256g	LAFE0A06986g	LADA0D09626g	LANO0E13806g	LAMI0H08240g	SAKL0G13464g	YJL026W,YGR180C	RNR2,RNR4	Ribonucleotide-diphosphate reductase (RNR), small subunit | Ribonucleotide-diphosphate reductase (RNR) small subunit	cytoplasm (x2) | nucleus (x2)	oxidoreductase activity (x2)	nucleobase-containing small molecule metabolic process (x1) | cofactor metabolic process (x2)	-	0	0	0	0	0	0	0	0	0	0	-	-	-	-	-	-	-	-	-	-
342	1	1	1	1	1	1	1	1	1	1	2	LAWA0C07338g	KLTH0F07524g	LAME0H01596g	LAFA0G07008g	LACI0D06150g	LAFE0B10374g	LADA0F08724g	LANO0G06942g	LAMI0H03532g	SAKL0F14102g	YPR042C,YJR091C	PUF2,JSN1	mRNA-binding protein | Member of the Puf family of RNA-binding proteins	mitochondrion (x2) | cytoplasm (x1) | mitochondrial envelope (x1) | membrane (x1)	RNA binding (x2) | mRNA binding (x2)	RNA catabolic process (x2)	-	0	0	0	0	0	0	0	0	0	0	-	-	-	-	-	-	-	-	-	-
343	1	1	1	1	1	1	1	1	1	1	2	LAWA0C11034g	KLTH0B03432g	LAME0C03136g	LAFA0B02806g	LACI0A02740g	LAFE0A06414g	LADA0D10132g	LANO0E14334g	LAMI0H08746g	SAKL0G12914g	YLR020C,YLL012W	YEH2,YEH1	Steryl ester hydrolase | Steryl ester hydrolase	cytoplasm (x1) | plasma membrane (x2) | membrane (x1)	other (x2)	cell wall organization or biogenesis (x1) | lipid metabolic process (x2)	-	0	0	0	0	0	0	0	0	0	0	-	-	-	-	-	-	-	-	-	-
344	1	1	1	1	1	1	1	1	1	1	2	LAWA0C11078g	KLTH0B03388g	LAME0C03092g	LAFA0B02762g	LACI0A02784g	LAFE0A06370g	LADA0D10088g	LANO0E14290g	LAMI0H08790g	SAKL0G12870g	YLR019W,YLL010C	PSR2,PSR1	Plasma membrane phosphatase involved in the general stress response | Plasma membrane associated protein phosphatase	plasma membrane (x2) | membrane (x2)	phosphatase activity (x2)	other (x2)	-	0	0	0	0	0	0	0	0	0	0	-	-	-	-	-	-	-	-	-	-
345	1	1	1	1	1	1	1	1	1	1	2	LAWA0F06216g	KLTH0C07128g	LAME0H18690g	LAFA0D14224g	LACI0H01750g	LAFE0B01882g	LADA0H08548g	LANO0F10990g	LAMI0D12332g	SAKL0F12012g	YBL056W,YER089C	PTC3,PTC2	Type 2C protein phosphatase (PP2C) | Type 2C protein phosphatase (PP2C)	cytoplasm (x2) | nucleus (x2)	phosphatase activity (x2)	response to chemical stimulus (x2) | protein phosphorylation (x2) | response to osmotic stress (x2) | regulation of cell cycle (x2) | response to DNA damage stimulus (x1) | signaling (x1) | protein dephosphorylation (x2) | regulation of protein modification process (x2)	-	0	0	0	0	0	0	0	0	0	0	-	-	-	-	-	-	-	-	-	-
346	1	1	1	1	1	1	1	2	1	1	1	LAWA0E01288g	KLTH0D01342g	LAME0B01200g	LAFA0C09692g	LACI0G18052g	LAFE0D12002g	LADA0F08108g	LANO0C01354g,LANO0B08878g	LAMI0F05754g	SAKL0B11088g	YOR353C	SOG2	Key component of the RAM signaling network, required for proper cell morphogenesis and cell separation after mitosis	cytoplasm (x1) | cellular bud (x1) | site of polarized growth (x1)	unknown (x1)	cytokinesis (x1) | cell budding (x1) | signaling (x1)	-	0	0	0	0	0	0	0	0	0	0	-	-	-	-	-	-	-	-	-	-
347	1	1	1	1	1	1	1	1	1	2	1	LAWA0A05380g	KLTH0G15224g	LAME0G10330g	LAFA0E15676g	LACI0B04720g	LAFE0C08130g	LADA0F04940g	LANO0C04786g	LAMI0C06282g	SAKL0A08118g,SAKL0G17226g	YLR276C	DBP9	DEAD-box protein required for 27S rRNA processing	nucleolus (x1) | nucleus (x1)	helicase activity (x1) | ATPase activity (x1)	rRNA processing (x1) | ribosomal large subunit biogenesis (x1)	-	0	0	0	0	0	0	0	0	0	0	-	-	-	-	-	-	-	-	-	-
348	1	1	1	1	1	1	1	1	1	1	1	LAWA0B06568g	KLTH0F13310g	LAME0F08504g	LAFA0D08328g	LACI0G09604g	LAFE0G11408g	LADA0E13498g	LANO0H19702g	LAMI0E05930g	SAKL0F04532g	YIR002C	MPH1	3'-5' DNA helicase involved in error-free bypass of DNA lesions	nucleus (x1)	helicase activity (x1) | DNA binding (x1)	DNA repair (x1) | DNA recombination (x1) | response to DNA damage stimulus (x1) | DNA replication (x1) | regulation of DNA metabolic process (x1)	-	1	0	0	0	0	0	0	0	0	0	LAWA0B06590g	-	-	-	-	-	-	-	-	-
349	1	1	1	1	1	1	2	1	1	1	1	LAWA0G05732g	KLTH0F11968g	LAME0E06876g	LAFA0G11188g	LACI0F14114g	LAFE0E08922g	LADA0C04214g,LADA0D02806g	LANO0G11276g	LAMI0E01882g	SAKL0F06160g	YPR112C	MRD1	Essential conserved small ribosomal subunit (40s) synthesis factor	nucleolus (x1) | nucleus (x1)	RNA binding (x1) | rRNA binding (x1)	organelle assembly (x1) | rRNA processing (x1) | ribosomal small subunit biogenesis (x1) | ribosome assembly (x1)	-	0	0	0	0	0	0	0	0	0	0	-	-	-	-	-	-	-	-	-	-
350	1	1	1	1	1	1	1	1	1	1	2	LAWA0H11144g	KLTH0H12958g	LAME0E10682g	LAFA0G14994g	LACI0C02124g	LAFE0F10572g	LADA0H16622g	LANO0G15016g	LAMI0A06304g	SAKL0D09680g	YHR015W,YFR023W	MIP6,PES4	Putative RNA-binding protein | Poly(A) binding protein, suppressor of DNA polymerase epsilon mutation	nucleus (x1) | membrane (x1) | unknown (x1) | endomembrane system (x1)	RNA binding (x1) | unknown (x1)	nuclear transport (x1) | nucleobase-containing compound transport (x1) | unknown (x1)	-	0	0	0	0	0	0	0	0	0	0	-	-	-	-	-	-	-	-	-	-
351	1	1	1	1	1	1	1	1	1	1	2	LAWA0D01310g	KLTH0D17182g	LAME0E13630g	LAFA0F06392g	LACI0G00738g	LAFE0A00518g	LADA0A08482g	LANO0B00562g	LAMI0C03356g	SAKL0B12408g	YHR206W,YJR147W	SKN7,HMS2	Nuclear response regulator and transcription factor | Protein with similarity to heat shock transcription factors	cytoplasm (x1) | nucleus (x2)	DNA binding (x1) | signal transducer activity (x1) | unknown (x1) | nucleic acid binding transcription factor activity (x1)	response to osmotic stress (x1) | response to chemical stimulus (x1) | pseudohyphal growth (x1) | response to oxidative stress (x1) | transcription from RNA polymerase II promoter (x1)	-	0	0	0	0	0	0	0	0	0	0	-	-	-	-	-	-	-	-	-	-
352	1	1	1	1	1	1	1	1	1	1	2	LAWA0H07844g	KLTH0H09328g	LAME0H03334g	LAFA0E16864g	LACI0H16006g	LAFE0H12728g	LADA0H11716g	LANO0F05314g	LAMI0H13938g	SAKL0H21164g	YGR148C,YGL031C	RPL24B,RPL24A	Ribosomal 60S subunit protein L24B | Ribosomal 60S subunit protein L24A	cytoplasm (x2) | ribosome (x2)	RNA binding (x2) | structural molecule activity (x2) | structural constituent of ribosome (x2)	cytoplasmic translation (x2)	-	0	0	0	0	0	0	0	0	0	0	-	-	-	-	-	-	-	-	-	-
353	1	1	1	1	2	1	1	1	1	1	1	LAWA0E01068g	KLTH0D01122g	LAME0B00980g	LAFA0C09912g	LACI0A03598g,LACI0G18250g	LAFE0D12222g	LADA0F08328g	LANO0C01112g	LAMI0F05446g	SAKL0D14256g	YOR357C	SNX3	Sorting nexin required to maintain late-Golgi resident enzymes in their proper location by recycling molecules from the prevacuolar compartment	cytoplasm (x1)	lipid binding (x1) | ion binding (x1)	endosomal transport (x1) | Golgi vesicle transport (x1)	-	0	0	0	0	0	0	0	0	0	0	-	-	-	-	-	-	-	-	-	-
354	1	1	1	1	1	1	2	1	1	1	1	LAWA0F00232g	KLTH0E16522g	LAME0G20098g	LAFA0F00892g	LACI0B00320g	LAFE0B12596g	LADA0D13014g,LADA0E03114g	LANO0B08526g	LAMI0E16226g	SAKL0D00242g	YMR315W	Unknown name	Protein with NADP(H) oxidoreductase activity	cytoplasm (x1) | nucleus (x1)	oxidoreductase activity (x1)	nucleobase-containing small molecule metabolic process (x1) | cofactor metabolic process (x1)	-	0	0	0	0	0	0	0	0	0	0	-	-	-	-	-	-	-	-	-	-
355	1	1	1	1	1	1	1	1	1	1	2	LAWA0E07228g	KLTH0D07260g	LAME0G14950g	LAFA0F07668g	LACI0H18052g	LAFE0H14818g	LADA0G12288g	LANO0D04742g	LAMI0F10352g	SAKL0A09856g	YKL038W,YBR033W	RGT1,EDS1	Glucose-responsive transcription factor | Putative zinc cluster protein, predicted to be a transcription factor	nucleus (x1) | unknown (x1)	protein binding transcription factor activity (x2) | DNA binding (x1) | nucleic acid binding transcription factor activity (x1)	transcription from RNA polymerase II promoter (x1) | regulation of transport (x1) | carbohydrate metabolic process (x1) | carbohydrate transport (x1) | unknown (x1)	-	0	0	0	0	0	0	0	0	0	0	-	-	-	-	-	-	-	-	-	-
356	1	1	1	1	1	1	1	1	1	1	2	LAWA0B07822g	KLTH0F14630g	LAME0F09758g	LAFA0D06964g	LACI0H21528g	LAFE0F04654g	LADA0B04874g	LANO0H21022g	LAMI0H04324g	SAKL0F02970g	YPR145W,YGR124W	ASN1,ASN2	Asparagine synthetase | Asparagine synthetase	cytoplasm (x2)	ligase activity (x2)	cellular amino acid metabolic process (x2)	-	0	0	0	0	0	0	0	0	0	0	-	-	-	-	-	-	-	-	-	-
357	1	1	1	1	1	1	1	1	1	1	2	LAWA0F11320g	KLTH0E11946g	LAME0H08372g	LAFA0E11100g	LACI0G11540g	LAFE0G13410g	LADA0D05226g	LANO0E09472g	LAMI0H07184g	SAKL0H10736g	YBR161W,YPL057C	CSH1,SUR1	Mannosylinositol phosphorylceramide (MIPC) synthase catalytic subunit | Mannosylinositol phosphorylceramide (MIPC) synthase catalytic subunit	vacuole (x1) | cytoplasm (x2) | membrane (x1)	transferase activity, transferring glycosyl groups (x2)	lipid metabolic process (x2)	-	0	0	0	0	0	0	0	0	0	0	-	-	-	-	-	-	-	-	-	-
358	1	1	1	1	1	1	1	1	1	1	2	LAWA0F00628g	KLTH0E16148g	LAME0G19724g	LAFA0F01288g	LACI0B00716g	LAFE0B12200g	LADA0D12640g	LANO0B08152g	LAMI0E15874g	SAKL0C07678g	YAR042W,YDL019C	SWH1,OSH2	Protein similar to mammalian oxysterol-binding protein | Member of an oxysterol-binding protein family with seven members	Golgi apparatus (x1) | site of polarized growth (x1) | cytoplasm (x1) | cell cortex (x2) | endoplasmic reticulum (x1) | endomembrane system (x2) | nucleus (x1) | membrane (x1) | cellular bud (x1) | plasma membrane (x1)	lipid binding (x2) | ion binding (x2)	lipid transport (x2) | exocytosis (x2) | endocytosis (x2)	-	0	0	0	0	0	0	0	0	0	0	-	-	-	-	-	-	-	-	-	-
359	1	1	1	1	1	1	1	1	1	1	2	LAWA0E06370g	KLTH0D06402g	LAME0G15764g	LAFA0F08482g	LACI0H17260g	LAFE0H14026g	LADA0G11452g	LANO0D05556g	LAMI0F11188g	SAKL0A08932g	YKR003W,YHR001W	OSH6,OSH7	Member of an oxysterol-binding protein family | Oxysterol-binding protein	cytoplasm (x2) | cell cortex (x2) | endoplasmic reticulum (x2) | membrane (x2)	lipid binding (x1) | ion binding (x2)	lipid transport (x2) | endosomal transport (x1) | lipid metabolic process (x2) | exocytosis (x2) | endocytosis (x2)	-	0	0	0	0	0	0	0	0	0	0	-	-	-	-	-	-	-	-	-	-
360	1	1	1	1	1	1	1	1	1	1	2	LAWA0E10418g	KLTH0D10824g	LAME0F12794g	LAFA0B06106g	LACI0G07426g	LAFE0G09054g	LADA0C07250g	LANO0H15390g	LAMI0F04764g	SAKL0H06974g	YPL145C,YOR237W	KES1,HES1	One of seven members of the yeast oxysterol binding protein family | Protein implicated in the regulation of ergosterol biosynthesis	cytoplasm (x1) | membrane (x1) | unknown (x1) | Golgi apparatus (x1) | endomembrane system (x1)	lipid binding (x1) | ion binding (x2)	lipid transport (x1) | Golgi vesicle transport (x2) | exocytosis (x2) | endocytosis (x2)	-	0	0	0	0	0	0	0	0	0	0	-	-	-	-	-	-	-	-	-	-
361	1	1	1	1	1	1	1	1	1	1	2	LAWA0G16732g	KLTH0A06776g	LAME0H15324g	LAFA0F13498g	LACI0G24278g	LAFE0C01332g	LADA0F14488g	LANO0A01486g	LAMI0G11584g	SAKL0A01254g	YNR031C,YCR073C	SSK2,SSK22	MAP kinase kinase kinase of HOG1 mitogen-activated signaling pathway | MAP kinase kinase kinase of HOG1 mitogen-activated signaling pathway	cytoplasm (x1) | cellular bud (x1) | unknown (x1) | site of polarized growth (x1)	kinase activity (x2) | signal transducer activity (x2)	response to osmotic stress (x1) | cytoskeleton organization (x2) | signaling (x2) | protein phosphorylation (x2)	-	0	0	0	0	0	0	0	0	0	0	-	-	-	-	-	-	-	-	-	-
362	1	1	1	1	1	1	1	1	1	1	2	LAWA0E10286g	KLTH0D10670g	LAME0F12926g	LAFA0B06238g	LACI0G07580g	LAFE0G09252g	LADA0C07382g	LANO0H15126g	LAMI0H05908g	SAKL0H07128g	YPL140C,YOR231W	MKK2,MKK1	MAPKK involved in the protein kinase C signaling pathway | MAPKK involved in the protein kinase C signaling pathway	cellular bud (x1) | other (x1) | site of polarized growth (x1)	kinase activity (x2)	peroxisome organization (x2) | signaling (x2) | protein phosphorylation (x2)	-	0	0	0	0	0	0	0	0	0	0	-	-	-	-	-	-	-	-	-	-
363	1	1	1	1	1	1	1	1	1	1	2	LAWA0H09912g	KLTH0H11396g	LAME0E09252g	LAFA0G13564g	LACI0D09076g	LAFE0F09010g	LADA0H15038g	LANO0G13630g	LAMI0H11210g	SAKL0D07656g	YFR014C,YOL016C	CMK1,CMK2	Calmodulin-dependent protein kinase | Calmodulin-dependent protein kinase	cytoplasm (x2)	kinase activity (x2)	signaling (x2) | protein phosphorylation (x2)	-	0	0	0	0	0	0	0	0	0	0	-	-	-	-	-	-	-	-	-	-
364	1	1	1	1	1	1	1	1	1	1	2	LAWA0D06414g	KLTH0E09658g	LAME0H06612g	LAFA0E09340g	LACI0F10594g	LAFE0D01310g	LADA0D07382g	LANO0E11672g	LAMI0B02542g	SAKL0E04950g	YMR139W,YDL079C	RIM11,MRK1	Protein kinase | Glycogen synthase kinase 3 (GSK-3) homolog	cytoplasm (x1) | unknown (x1)	kinase activity (x2)	sporulation (x2) | protein phosphorylation (x1)	-	0	0	0	0	0	0	0	0	0	0	-	-	-	-	-	-	-	-	-	-
365	1	1	1	1	1	1	1	1	1	1	2	LAWA0E02388g	KLTH0D02486g	LAME0B02278g	LAFA0C08636g	LACI0G16930g	LAFE0D10858g	LADA0F07096g	LANO0C02498g	LAMI0F06766g	SAKL0B09856g	YOL045W,YAL017W	PSK2,PSK1	PAS-domain containing serine/threonine protein kinase | PAS domain-containing serine/threonine protein kinase	mitochondrion (x2) | cytoplasm (x1)	kinase activity (x2)	carbohydrate metabolic process (x2) | generation of precursor metabolites and energy (x2) | protein phosphorylation (x2)	-	0	0	0	0	0	0	0	0	0	0	-	-	-	-	-	-	-	-	-	-
366	1	1	1	1	1	1	1	1	1	1	2	LAWA0G05776g	KLTH0F12012g	LAME0E06920g	LAFA0G11232g	LACI0F14070g	LAFE0E08878g	LADA0C04258g	LANO0G11320g	LAMI0E01838g	SAKL0F06094g	YGR092W,YPR111W	DBF2,DBF20	Ser/Thr kinase involved in transcription and stress response | Ser/Thr kinase involved in late nuclear division	cytoplasm (x2) | cytoskeleton (x1) | cellular bud (x2) | site of polarized growth (x2) | microtubule organizing center (x2)	kinase activity (x2)	protein phosphorylation (x1) | cytokinesis (x1) | cellular ion homeostasis (x2) | organelle fission (x2) | RNA catabolic process (x2)	-	0	0	0	0	0	0	0	0	0	0	-	-	-	-	-	-	-	-	-	-
367	1	1	1	1	1	1	1	1	1	1	2	LAWA0F10528g	KLTH0E11110g	LAME0H09208g	LAFA0E11914g	LACI0H07954g	LAFE0H04456g	LADA0D06062g	LANO0E10330g	LAMI0D04610g	SAKL0H11748g	YDR247W,YPL026C	VHS1,SKS1	Cytoplasmic serine/threonine protein kinase | Putative serine/threonine protein kinase	cytoplasm (x2) | nucleus (x1)	kinase activity (x2)	transcription from RNA polymerase II promoter (x1) | mitotic cell cycle (x1) | response to chemical stimulus (x2) | carbohydrate transport (x1) | protein phosphorylation (x1)	-	0	0	0	0	0	0	0	0	0	0	-	-	-	-	-	-	-	-	-	-
368	1	1	1	1	1	1	1	1	1	1	2	LAWA0F01750g	KLTH0C02662g	LAME0D04478g	LAFA0E03444g	LACI0D07514g	LAFE0C11672g	LADA0B02564g	LANO0F15302g	LAMI0G03312g	SAKL0D12628g	YJR059W,YKL198C	PTK2,PTK1	Putative serine/threonine protein kinase involved in regulation of ion transport across plasma membrane | Putative serine/threonine protein kinase that regulates spermine uptake	nucleus (x1) | cytoplasm (x1) | unknown (x1) | plasma membrane (x1) | membrane (x1)	kinase activity (x2)	mitotic cell cycle (x1) | other (x1) | cellular ion homeostasis (x1) | protein phosphorylation (x1)	-	0	0	0	0	0	0	0	0	0	0	-	-	-	-	-	-	-	-	-	-
369	1	1	1	1	1	1	1	1	1	1	2	LAWA0C04522g	KLTH0F04730g	LAME0G04324g	LAFA0G04412g	LACI0E08834g	LAFE0G04522g	LADA0E04434g	LANO0G04324g	LAMI0G13190g	SAKL0C05280g	YKL168C,YJL165C	KKQ8,HAL5	Putative serine/threonine protein kinase with unknown cellular role | Putative protein kinase	cytoplasm (x1) | unknown (x1)	kinase activity (x2)	protein dephosphorylation (x1) | protein phosphorylation (x1) | cellular ion homeostasis (x1) | unknown (x1)	-	0	0	0	0	0	0	0	0	0	0	-	-	-	-	-	-	-	-	-	-
370	1	1	1	1	1	1	1	1	1	1	2	LAWA0F09384g	KLTH0G10318g	LAME0G12750g	LAFA0E20780g	LACI0F16226g	LAFE0E10990g	LADA0E10946g	LANO0H06590g	LAMI0E03972g	SAKL0E07722g	YIL095W,YNL020C	PRK1,ARK1	Protein serine/threonine kinase | Serine/threonine protein kinase	cytoplasm (x2) | cytoskeleton (x2) | cell cortex (x2) | site of polarized growth (x2)	kinase activity (x2)	regulation of transport (x2) | cytoskeleton organization (x2) | protein phosphorylation (x2) | cytokinesis (x2) | endocytosis (x2)	-	0	0	0	0	0	0	0	0	0	0	-	-	-	-	-	-	-	-	-	-
371	1	1	1	1	1	1	1	1	1	1	2	LAWA0C07558g	KLTH0B07106g	LAME0F16688g	LAFA0F14686g	LACI0H07052g	LAFE0H03576g	LADA0E03246g	LANO0H03840g	LAMI0H00298g	SAKL0E12958g	YDL214C,YNL183C	PRR2,NPR1	Serine/threonine protein kinase | Protein kinase	cytoplasm (x1) | nucleus (x1) | plasma membrane (x1) | Golgi apparatus (x1) | membrane (x1)	kinase activity (x2) | signal transducer activity (x1)	response to chemical stimulus (x1) | protein phosphorylation (x1) | conjugation (x2) | endocytosis (x1) | transcription from RNA polymerase II promoter (x1) | regulation of transport (x1) | transmembrane transport (x1)	-	0	0	0	0	0	0	0	0	0	0	-	-	-	-	-	-	-	-	-	-
372	1	1	1	1	1	1	1	1	1	1	2	LAWA0C12376g	KLTH0B02178g	LAME0C01882g	LAFA0B01574g	LACI0F18954g	LAFE0E13696g	LADA0D11254g	LANO0E15478g	LAMI0A07470g	SAKL0G13882g	YGR188C,YJL013C	BUB1,MAD3	Protein kinase involved in the cell cycle checkpoint into anaphase | Subunit of spindle-assembly checkpoint complex	nucleus (x1) | chromosome (x2)	kinase activity (x1) | unknown (x1)	mitotic cell cycle (x2) | organelle fission (x1) | protein phosphorylation (x2) | regulation of organelle organization (x2) | chromosome segregation (x1) | regulation of cell cycle (x2) | cytoskeleton organization (x2)	-	0	0	0	0	0	0	0	0	0	0	-	-	-	-	-	-	-	-	-	-
373	1	1	1	1	1	1	1	1	1	2	1	LAWA0E12090g	KLTH0D12518g	LAME0C04742g	LAFA0B04412g	LACI0G05732g	LAFE0E06106g	LADA0C05622g	LANO0H17040g	LAMI0A04280g	SAKL0H10340g,SAKL0H05214g	YMR216C	SKY1	SR protein kinase (SRPK) involved in regulating proteins involved in mRNA metabolism and cation homeostasis	cytoplasm (x1)	kinase activity (x1)	response to chemical stimulus (x1) | protein phosphorylation (x1) | RNA splicing (x1) | mRNA processing (x1) | cellular ion homeostasis (x1) | protein targeting (x1) | regulation of transport (x1) | nuclear transport (x1)	-	0	0	0	0	0	0	0	0	0	0	-	-	-	-	-	-	-	-	-	-
374	1	1	1	1	1	1	1	1	1	1	2	LAWA0D03180g	KLTH0F12254g	LAME0F07646g	LAFA0D09164g	LACI0F13850g	LAFE0A03136g	LADA0E12662g	LANO0H18844g	LAMI0E01574g	SAKL0F05698g	YOR016C,YAL007C	ERP4,ERP2	Member of the p24 family involved in ER to Golgi transport | Member of the p24 family involved in ER to Golgi transport	cytoplasm (x1) | cytoplasmic membrane-bounded vesicle (x1) | membrane (x1)	unknown (x2)	Golgi vesicle transport (x2)	-	0	0	0	0	0	0	0	0	0	0	-	-	-	-	-	-	-	-	-	-
375	1	1	1	1	1	1	2	1	1	1	1	LAWA0F00848g	KLTH0E15906g	LAME0G19482g	LAFA0F01530g	LACI0B00936g	LAFE0B11980g	LADA0D12332g,LADA0H18514g	LANO0B07910g	LAMI0E15632g	SAKL0C07942g	YDL014W	NOP1	Nucleolar protein, component of the small subunit processome complex, which is required for processing of pre-18S rRNA	cytoplasm (x1) | ribosome (x1) | nucleolus (x1) | nucleus (x1)	methyltransferase activity (x1)	RNA modification (x1) | rRNA processing (x1) | snoRNA processing (x1)	-	0	0	0	0	0	0	0	0	0	0	-	-	-	-	-	-	-	-	-	-
376	1	1	1	1	1	1	1	1	1	1	2	LAWA0F14972g	KLTH0E15686g	LAME0G19240g	LAFA0F01772g	LACI0B01178g	LAFE0B11738g	LADA0D12090g	LANO0B07668g	LAMI0E11826g	SAKL0D04488g	YBR031W,YDR012W	RPL4A,RPL4B	Ribosomal 60S subunit protein L4A | Ribosomal 60S subunit protein L4B	cytoplasm (x2) | ribosome (x2)	structural molecule activity (x2) | structural constituent of ribosome (x2)	cytoplasmic translation (x2)	-	0	0	0	0	0	0	0	0	0	0	-	-	-	-	-	-	-	-	-	-
377	1	1	1	1	1	1	1	1	1	2	1	LAWA0D12684g	KLTH0G01320g	LAME0H20098g	LAFA0D01200g	LACI0C08636g	LAFE0F17150g	LADA0G15610g	LANO0D01354g	LAMI0D02410g	SAKL0F01496g,SAKL0E12276g	YER040W	GLN3	Transcriptional activator of genes regulated by nitrogen catabolite repression (NCR), localization and activity regulated by quality of nitrogen source	cytoplasm (x1) | nucleus (x1)	DNA binding (x1) | nucleic acid binding transcription factor activity (x1)	response to chemical stimulus (x1) | transcription from RNA polymerase II promoter (x1)	-	0	0	0	0	0	0	0	0	0	0	-	-	-	-	-	-	-	-	-	-
378	1	1	1	1	1	1	1	1	1	0	3	LAWA0H05116g	KLTH0H06314g	LAME0C07382g	LAFA0C04104g	LACI0G19174g	LAFE0C06788g	LADA0A03510g	LANO0F02388g	LAMI0F08724g	-	YLR013W,YIR013C,YPL021W	GAT3,GAT4,ECM23	Protein containing GATA family zinc finger motifs | Protein containing GATA family zinc finger motifs | Non-essential protein of unconfirmed function	nucleus (x1) | unknown (x2)	DNA binding (x3) | nucleic acid binding transcription factor activity (x2)	pseudohyphal growth (x2) | other (x1)	-	0	0	0	0	0	0	0	0	0	0	-	-	-	-	-	-	-	-	-	-
379	1	1	1	1	1	1	1	1	1	1	2	LAWA0F14664g	KLTH0E15356g	LAME0G18954g	LAFA0B07448g	LACI0B01508g	LAFE0B11408g	LADA0D11826g	LANO0B07360g	LAMI0E12156g	SAKL0D05082g	YJL108C,YJL107C	PRM10,Unknown name	Pheromone-regulated protein, proposed to be involved in mating | Putative protein of unknown function	unknown (x1) | membrane (x1)	unknown (x2)	unknown (x2)	-	0	0	0	0	0	0	0	0	0	0	-	-	-	-	-	-	-	-	-	-
380	1	1	1	1	1	1	1	1	1	1	2	LAWA0E03070g	KLTH0D03102g	LAME0A05864g	LAFA0A02542g	LACI0B01574g	LAFE0B11320g	LADA0C10110g	LANO0D08790g	LAMI0E12222g	SAKL0D05148g	YKR029C,YJL105W	SET3,SET4	Defining member of the SET3 histone deacetylase complex which is a meiosis-specific repressor of sporulation genes | Protein of unknown function, contains a SET domain	nucleus (x1) | unknown (x1) | chromosome (x1)	unknown (x1) | histone binding (x1)	histone modification (x1) | chromatin organization (x1) | regulation of cell cycle (x1) | meiotic cell cycle (x1) | unknown (x1)	-	0	0	0	0	0	0	0	0	0	0	-	-	-	-	-	-	-	-	-	-
381	1	1	1	1	1	1	1	1	1	1	2	LAWA0G05512g	KLTH0F11726g	LAME0E06634g	LAFA0G10946g	LACI0G15500g	LAFE0D09384g	LADA0C03972g	LANO0G11012g	LAMI0D09120g	SAKL0B08294g	YPR080W,YBR118W	TEF1,TEF2	Translational elongation factor EF-1 alpha | Translational elongation factor EF-1 alpha	mitochondrion (x2) | cytoplasm (x1) | ribosome (x2)	RNA binding (x2) | ion binding (x2) | translation factor activity, nucleic acid binding (x2)	nuclear transport (x2) | translational elongation (x2) | nucleobase-containing compound transport (x2)	-	0	0	0	0	0	0	0	0	0	0	-	-	-	-	-	-	-	-	-	-
382	1	1	1	1	1	1	1	1	1	1	2	LAWA0B10946g	KLTH0F17908g	LAME0D01156g	LAFA0D16314g	LACI0H24630g	LAFE0F01354g	LADA0A01222g	LANO0H24102g	LAMI0H10088g	SAKL0G00594g	YKR084C,YOR076C	HBS1,SKI7	GTPase with similarity to translation release factors | Coupling protein for the Ski complex and cytoplasmic exosome	cytoplasm (x2)	protein binding, bridging (x1) | GTPase activity (x1)	RNA catabolic process (x2)	-	0	0	0	0	0	0	0	0	0	0	-	-	-	-	-	-	-	-	-	-
383	1	1	1	1	1	1	1	1	1	1	2	LAWA0E03334g	KLTH0D03366g	LAME0A05644g	LAFA0A02762g	LACI0B01816g	LAFE0C10968g	LADA0C09890g	LANO0D08570g	LAMI0H07646g	SAKL0D05434g	YKR027W,YJL099W	BCH2,CHS6	Member of the ChAPs (Chs5p-Arf1p-binding proteins) family | Member of the ChAPs (Chs5p-Arf1p-binding proteins) family	mitochondrion (x2) | cytoplasm (x2) | cytoplasmic membrane-bounded vesicle (x2) | Golgi apparatus (x1)	unknown (x2)	cell wall organization or biogenesis (x2) | carbohydrate metabolic process (x2) | Golgi vesicle transport (x2)	-	0	0	0	0	0	0	0	0	0	0	-	-	-	-	-	-	-	-	-	-
384	1	1	1	1	1	1	1	1	1	1	2	LAWA0B03510g	KLTH0E04070g	LAME0F14554g	LAFA0G18866g	LACI0F04808g	LAFE0D06964g	LADA0F11210g	LANO0B05864g	LAMI0C04588g	SAKL0B05390g	YOR299W,YMR237W	BUD7,BCH1	Member of the ChAPs family (Chs5p-Arf1p-binding proteins) | Member of the ChAPs family (Chs5p-Arf1p-binding proteins)	cytoplasm (x2) | ribosome (x2) | cytoplasmic membrane-bounded vesicle (x2) | Golgi apparatus (x1)	unknown (x2)	cell wall organization or biogenesis (x2) | carbohydrate metabolic process (x2) | cytokinesis (x2) | Golgi vesicle transport (x1)	-	0	0	0	0	0	0	0	0	0	0	-	-	-	-	-	-	-	-	-	-
385	0	1	1	1	1	1	1	1	1	1	2	-	KLTH0D03388g	LAME0A05622g	LAFA0A02784g	LACI0B01838g	LAFE0C10946g	LADA0C09868g	LANO0D08548g	LAMI0H07668g	SAKL0D05456g	YKR028W,YJL098W	SAP190,SAP185	Protein that forms a complex with the Sit4p protein phosphatase | Protein that forms a complex with the Sit4p protein phosphatase	mitochondrion (x2) | cytoplasm (x1)	unknown (x1) | phosphatase activity (x1)	mitotic cell cycle (x2) | RNA modification (x2) | signaling (x1) | tRNA processing (x2)	-	1	0	0	0	0	0	0	0	0	0	LAWA0E03356g	-	-	-	-	-	-	-	-	-
386	1	1	1	1	1	1	1	1	1	1	2	LAWA0D12838g	KLTH0G01144g	LAME0H20274g	LAFA0D01024g	LACI0C08812g	LAFE0F17326g	LADA0G15786g	LANO0D01178g	LAMI0D02212g	SAKL0F01320g	YFR040W,YGL229C	SAP155,SAP4	Protein required for function of the Sit4p protein phosphatase | Protein required for function of the Sit4p protein phosphatase	mitochondrion (x2) | cytoplasm (x1)	phosphatase activity (x2)	mitotic cell cycle (x2)	-	0	0	0	0	0	0	0	0	0	0	-	-	-	-	-	-	-	-	-	-
387	1	1	1	1	1	1	2	1	1	1	1	LAWA0B12354g	KLTH0F19338g	LAME0C08900g	LAFA0C02498g	LACI0F01024g	LAFE0G18492g	LADA0D00672g,LADA0D00650g	LANO0F00826g	LAMI0G06722g	SAKL0C13332g	YOL138C	RTC1	Subunit of the SEA (Seh1-associated) complex, a coatomer-related complex that associates dynamically with the vacuole	vacuole (x1) | cytoplasm (x1) | ribosome (x1) | membrane (x1)	unknown (x1)	unknown (x1)	-	0	0	0	0	0	0	0	0	0	0	-	-	-	-	-	-	-	-	-	-
388	1	1	1	1	1	1	1	1	1	1	2	LAWA0D05908g	KLTH0E09108g	LAME0F18008g	LAFA0F11584g	LACI0B02454g	LAFE0C10352g	LADA0E01970g	LANO0H02564g	LAMI0G00254g	SAKL0E04422g	YMR124W,YLR031W	Unknown name,Unknown name	Protein of unknown function | Putative protein of unknown function	cytoplasm (x1) | unknown (x1)	unknown (x2)	unknown (x2)	-	0	0	0	0	0	0	0	0	0	0	-	-	-	-	-	-	-	-	-	-
389	1	1	1	1	1	1	1	1	1	1	2	LAWA0D05820g	KLTH0E09020g	LAME0F18096g	LAFA0F11672g	LACI0B02542g	LAFE0C10264g	LADA0E01882g	LANO0H02476g	LAMI0G00342g	SAKL0E04356g	YMR121C,YLR029C	RPL15B,RPL15A	Ribosomal 60S subunit protein L15B | Ribosomal 60S subunit protein L15A	cytoplasm (x2) | ribosome (x1) | nucleolus (x1) | nucleus (x2)	RNA binding (x2) | structural molecule activity (x2) | structural constituent of ribosome (x2)	cytoplasmic translation (x2)	-	0	0	0	0	0	0	0	0	0	0	-	-	-	-	-	-	-	-	-	-
390	1	1	1	1	1	1	1	1	1	1	2	LAWA0D05798g	KLTH0E08998g	LAME0F18118g	LAFA0F11694g	LACI0B02564g	LAFE0C10242g	LADA0E01860g	LANO0H02454g	LAMI0G00364g	SAKL0E04334g	YMR120C,YLR028C	ADE17,ADE16	Enzyme of 'de novo' purine biosynthesis | Enzyme of 'de novo' purine biosynthesis	cytoplasm (x2) | plasma membrane (x1) | membrane (x1)	hydrolase activity, acting on carbon-nitrogen (but not peptide) bonds (x2)	generation of precursor metabolites and energy (x1) | nucleobase-containing small molecule metabolic process (x1) | sporulation (x2) | cellular respiration (x1)	-	0	0	0	0	0	0	0	0	0	0	-	-	-	-	-	-	-	-	-	-
391	1	1	1	1	1	1	1	1	1	1	2	LAWA0D05754g	KLTH0E08954g	LAME0F18162g	LAFA0F11716g	LACI0B02608g	LAFE0C10198g	LADA0E01816g	LANO0H02410g	LAMI0G00408g	SAKL0E04312g	YMR119W,YNL008C	ASI1,ASI3	Putative integral membrane E3 ubiquitin ligase | Putative integral membrane E3 ubiquitin ligase	cytoplasm (x2) | membrane (x2) | nucleus (x2) | endoplasmic reticulum (x2) | endomembrane system (x2)	ligase activity (x2)	proteolysis involved in cellular protein catabolic process (x2)	-	0	0	0	0	0	0	0	0	0	0	-	-	-	-	-	-	-	-	-	-
392	1	1	1	1	1	1	2	1	1	1	1	LAWA0E04236g	KLTH0D04224g	LAME0A04852g	LAFA0A03532g	LACI0B02630g	LAFE0C10176g	LADA0G09274g,LADA0D13256g	LANO0D07756g	LAMI0G05578g	SAKL0E04268g	YLR027C	AAT2	Cytosolic aspartate aminotransferase, involved in nitrogen metabolism	cytoplasm (x1) | peroxisome (x1)	other (x1)	cellular amino acid metabolic process (x1)	-	0	0	0	0	0	0	0	0	0	0	-	-	-	-	-	-	-	-	-	-
393	1	1	1	1	1	1	1	1	1	1	2	LAWA0E04346g	KLTH0D04312g	LAME0A04742g	LAFA0A03642g	LACI0B02740g	LAFE0C10066g	LADA0G09450g	LANO0D07646g	LAMI0G05468g	SAKL0E04136g	YKL141W,YMR118C	SDH3,SHH3	Subunit of both succinate dehydrogenase and of TIM22 translocase | Putative mitochondrial inner membrane protein of unknown function	mitochondrion (x1) | cytoplasm (x2) | mitochondrial envelope (x1) | membrane (x1)	unknown (x1) | oxidoreductase activity (x1)	cellular respiration (x1) | protein targeting (x1) | generation of precursor metabolites and energy (x1) | unknown (x1) | mitochondrion organization (x1) | transmembrane transport (x1)	-	0	0	0	0	0	0	0	0	0	0	-	-	-	-	-	-	-	-	-	-
394	1	1	1	1	2	1	1	1	1	1	1	LAWA0G13872g	KLTH0G06226g	LAME0H10044g	LAFA0E12772g	LACI0C04060g,LACI0F02146g	LAFE0F12508g	LADA0E07008g	LANO0H10594g	LAMI0D04192g	SAKL0G10098g	YHR037W	PUT2	Delta-1-pyrroline-5-carboxylate dehydrogenase, nuclear-encoded mitochondrial protein involved in utilization of proline as sole nitrogen source	mitochondrion (x1) | cytoplasm (x1)	oxidoreductase activity (x1)	cellular amino acid metabolic process (x1)	-	0	0	0	0	0	0	0	0	0	0	-	-	-	-	-	-	-	-	-	-
395	1	1	1	1	1	1	1	1	1	1	2	LAWA0E04698g	KLTH0D04664g	LAME0G17392g	LAFA0F10154g	LACI0B03114g	LAFE0C09692g	LADA0G09824g	LANO0D07294g	LAMI0G05094g	SAKL0E03872g	YMR113W,YKL132C	FOL3,RMA1	Dihydrofolate synthetase, involved in folic acid biosynthesis | Putative dihydrofolate synthetase	mitochondrion (x2) | cytoplasm (x1)	ligase activity (x2)	cellular amino acid metabolic process (x1) | cofactor metabolic process (x1) | unknown (x1)	-	0	0	0	0	0	0	0	0	0	0	-	-	-	-	-	-	-	-	-	-
396	1	1	1	1	1	1	1	1	1	1	2	LAWA0E04742g	KLTH0D04708g	LAME0G17348g	LAFA0F10110g	LACI0B03158g	LAFE0C09648g	LADA0G09868g	LANO0D07250g	LAMI0G05050g	SAKL0E03916g	YMR115W,YKL133C	MGR3,Unknown name	Subunit of the mitochondrial (mt) i-AAA protease supercomplex, which degrades misfolded mitochondrial proteins | Putative protein of unknown function	mitochondrion (x1) | cytoplasm (x1) | unknown (x1) | mitochondrial envelope (x1) | membrane (x1)	unknown (x1) | other (x1)	proteolysis involved in cellular protein catabolic process (x1) | unknown (x1)	-	0	0	0	0	0	0	0	0	0	0	-	-	-	-	-	-	-	-	-	-
397	1	1	1	1	1	1	1	1	1	1	2	LAWA0F14224g	KLTH0E14850g	LAME0F03092g	LAFA0F16336g	LACI0G14532g	LAFE0G16468g	LADA0D01970g	LANO0E06546g	LAMI0E09472g	SAKL0B07150g	YBR089C-A,YPR052C	NHP6B,NHP6A	High-mobility group (HMG) protein, binds to and remodels nucleosomes | High-mobility group (HMG) protein, binds to and remodels nucleosomes	nucleus (x2)	DNA binding (x2)	DNA-dependent transcription, initiation (x1) | chromatin organization (x2) | transcription from RNA polymerase III promoter (x2) | response to DNA damage stimulus (x1) | DNA repair (x2) | transcription from RNA polymerase II promoter (x2)	-	0	0	0	0	0	0	0	0	0	0	-	-	-	-	-	-	-	-	-	-
398	1	1	1	1	1	1	1	1	0	1	2	LAWA0E06876g	KLTH0D06908g	LAME0G15258g	LAFA0F07976g	LACI0H17766g	LAFE0H14532g	LADA0G11980g	LANO0D05050g	-	SAKL0A09548g	YKL032C,YMR072W	IXR1,ABF2	Protein that binds DNA intrastrand cross-links formed by cisplatin | Mitochondrial DNA-binding protein	mitochondrion (x2) | cytoplasm (x1) | nucleus (x1) | chromosome (x1)	DNA binding (x2)	response to chemical stimulus (x1) | organelle inheritance (x1) | response to DNA damage stimulus (x1) | DNA repair (x1) | mitochondrion organization (x1) | transcription from RNA polymerase II promoter (x1)	-	0	0	0	0	0	0	0	0	1	0	-	-	-	-	-	-	-	-	LAMI0F10638g	-
399	1	1	1	1	1	1	1	2	1	1	1	LAWA0F06766g	KLTH0G16544g	LAME0B03158g	LAFA0C07734g	LACI0B03400g	LAFE0C09450g	LADA0F06216g	LANO0C03488g,LANO0H09626g	LAMI0C07602g	SAKL0C11286g	YDL001W	RMD1	Cytoplasmic protein required for sporulation	cytoplasm (x1)	unknown (x1)	unknown (x1)	-	0	0	0	0	0	0	0	0	0	0	-	-	-	-	-	-	-	-	-	-
400	1	1	1	1	1	1	1	1	1	1	2	LAWA0F06656g	KLTH0G16434g	LAME0B03268g	LAFA0C07624g	LACI0B03510g	LAFE0C09340g	LADA0F06106g	LANO0C03598g	LAMI0C07492g	SAKL0C11176g	YDR001C,YBR001C	NTH1,NTH2	Neutral trehalase, degrades trehalose | Putative neutral trehalase, required for thermotolerance	mitochondrion (x2) | cytoplasm (x1)	hydrolase activity, acting on glycosyl bonds (x2)	carbohydrate metabolic process (x2) | oligosaccharide metabolic process (x2)	-	0	0	0	0	0	0	0	0	0	0	-	-	-	-	-	-	-	-	-	-
401	1	1	1	1	1	1	1	1	1	1	2	LAWA0F06546g	KLTH0G16324g	LAME0B03378g	LAFA0C07514g	LACI0B03642g	LAFE0C09208g	LADA0F05996g	LANO0C03708g	LAMI0C07382g	SAKL0C10934g	YDR003W,YBR005W	RCR2,RCR1	Vacuolar protein | Protein of the ER membrane involved in cell wall chitin deposition	vacuole (x2) | cytoplasm (x1) | membrane (x1) | endoplasmic reticulum (x2) | endomembrane system (x1)	unknown (x2)	cell wall organization or biogenesis (x1) | other (x1)	-	0	0	0	0	0	0	0	0	0	0	-	-	-	-	-	-	-	-	-	-
402	1	1	1	1	1	1	1	1	1	1	2	LAWA0A04566g	KLTH0G16060g	LAME0G11078g	LAFA0E14884g	LACI0B03972g	LAFE0C08922g	LADA0F05732g	LANO0C03994g	LAMI0C07096g	SAKL0C10494g	YDL010W,YBR014C	GRX6,GRX7	Cis-golgi localized monothiol glutaredoxin, binds Fe-S cluster | Cis-golgi localized monothiol glutaredoxin	Golgi apparatus (x2) | cytoplasm (x2) | endoplasmic reticulum (x1) | endomembrane system (x1) | vacuole (x2) | membrane (x2)	oxidoreductase activity (x1) | ion binding (x2)	response to chemical stimulus (x2) | response to oxidative stress (x2)	-	0	0	0	0	0	0	0	0	0	0	-	-	-	-	-	-	-	-	-	-
403	1	1	1	1	1	1	1	1	1	1	2	LAWA0C01310g	KLTH0F01276g	LAME0G01112g	LAFA0G01112g	LACI0E12112g	LAFE0G01244g	LADA0H01156g	LANO0G01134g	LAMI0F01134g	SAKL0C01320g	YDR513W,YCL035C	GRX2,GRX1	Cytoplasmic glutaredoxin | Glutathione-dependent disulfide oxidoreductase	mitochondrion (x2) | cytoplasm (x1) | nucleus (x1)	transferase activity, transferring alkyl or aryl (other than methyl) groups (x2) | oxidoreductase activity (x2)	response to chemical stimulus (x2) | response to oxidative stress (x2)	-	0	0	0	0	0	0	0	0	0	0	-	-	-	-	-	-	-	-	-	-
404	1	1	1	1	1	1	1	1	1	1	2	LAWA0A04742g	KLTH0G15884g	LAME0G10902g	LAFA0E15060g	LACI0B04148g	LAFE0C08746g	LADA0F05556g	LANO0C04170g	LAMI0C06964g	SAKL0C10340g	YOL081W,YBR140C	IRA2,IRA1	GTPase-activating protein | GTPase-activating protein	mitochondrion (x2) | cytoplasm (x1) | membrane (x1) | endoplasmic reticulum (x2) | endomembrane system (x2)	enzyme regulator activity (x2)	nucleobase-containing small molecule metabolic process (x2) | signaling (x2)	-	0	0	0	0	0	0	0	0	0	0	-	-	-	-	-	-	-	-	-	-
405	1	1	1	1	1	1	1	1	1	1	2	LAWA0H13740g	KLTH0H15642g	LAME0A01156g	LAFA0A07162g	LACI0F10748g	LAFE0D01156g	LADA0F00936g	LANO0G17766g	LAMI0D12860g	SAKL0E05104g	YMR143W,YDL083C	RPS16A,RPS16B	Protein component of the small (40S) ribosomal subunit | Protein component of the small (40S) ribosomal subunit	cytoplasm (x2) | ribosome (x2)	structural molecule activity (x2) | structural constituent of ribosome (x2)	rRNA processing (x2) | ribosomal small subunit biogenesis (x2) | cytoplasmic translation (x2)	-	0	0	0	0	0	0	0	0	0	0	-	-	-	-	-	-	-	-	-	-
406	1	1	1	1	1	1	1	1	1	1	2	LAWA0A05116g	KLTH0G15488g	LAME0G10550g	LAFA0E15412g	LACI0B04500g	LAFE0C08394g	LADA0F05182g	LANO0C04544g	LAMI0C06546g	SAKL0A08470g	YLR270W,YOR173W	DCS1,DCS2	Non-essential hydrolase involved in mRNA decapping | m(7)GpppX pyrophosphatase regulator	mitochondrion (x2) | cytoplasm (x1) | nucleus (x1)	other (x1) | enzyme regulator activity (x1)	RNA catabolic process (x2)	-	0	0	0	0	0	0	0	0	0	0	-	-	-	-	-	-	-	-	-	-
407	1	1	0	0	1	1	0	1	1	1	2	LAWA0A05292g	KLTH0G15312g	-	-	LACI0B04654g	LAFE0C08218g	-	LANO0C04698g	LAMI0C06392g	SAKL0A08184g	YOR178C,YLR273C	GAC1,PIG1	Regulatory subunit for Glc7p type-1 protein phosphatase (PP1) | Putative targeting subunit for type-1 protein phosphatase Glc7p	cytoplasm (x2)	enzyme regulator activity (x2) | structural molecule activity (x1)	mitotic cell cycle (x2) | organelle fission (x2) | regulation of organelle organization (x1) | carbohydrate metabolic process (x1) | response to heat (x1) | regulation of cell cycle (x1) | generation of precursor metabolites and energy (x1) | transcription from RNA polymerase II promoter (x1)	-	0	0	1	1	0	0	1	0	0	0	-	-	LAME0G10396g	LAFA0E15566g	-	-	LADA0F05028g	-	-	-
408	1	1	1	1	1	1	1	1	1	1	2	LAWA0G14092g	KLTH0A04092g	LAME0A01992g	LAFA0A06370g	LACI0D01266g	LAFE0B05270g	LADA0A05380g	LANO0B03708g	LAMI0G12244g	SAKL0F08382g	YER054C,YIL045W	GIP2,PIG2	Putative regulatory subunit of protein phosphatase Glc7p | Putative type-1 protein phosphatase targeting subunit	cytoplasm (x2)	enzyme regulator activity (x2)	protein dephosphorylation (x2) | carbohydrate metabolic process (x2) | generation of precursor metabolites and energy (x1)	-	0	0	0	0	0	0	0	0	0	0	-	-	-	-	-	-	-	-	-	-
409	1	1	1	1	1	1	1	1	1	1	2	LAWA0A05402g	KLTH0G15202g	LAME0G10308g	LAFA0E15698g	LACI0B04742g	LAFE0C08108g	LADA0F04918g	LANO0C04808g	LAMI0C06260g	SAKL0A08096g	YLR277C,YOR179C	YSH1,SYC1	Putative endoribonuclease | Subunit of the APT subcomplex of cleavage and polyadenylation factor	nucleus (x2)	RNA binding (x2) | nuclease activity (x1)	transcription from RNA polymerase II promoter (x2) | RNA splicing (x1) | mRNA processing (x1) | DNA-dependent transcription, termination (x1) | snoRNA processing (x2)	-	0	0	0	0	0	0	0	0	0	0	-	-	-	-	-	-	-	-	-	-
410	1	1	1	1	1	1	1	1	1	1	2	LAWA0A05490g	KLTH0G15114g	LAME0G10198g	LAFA0E15808g	LACI0B04830g	LAFE0C08020g	LADA0F04830g	LANO0C04896g	LAMI0C06172g	SAKL0A08008g	YLR284C,YOR180C	ECI1,DCI1	Peroxisomal delta3,delta2-enoyl-CoA isomerase | Peroxisomal protein	cytoplasm (x2) | peroxisome (x2)	isomerase activity (x1) | not_yet_annotated (x1)	lipid metabolic process (x2)	-	0	0	0	0	0	0	0	0	0	0	-	-	-	-	-	-	-	-	-	-
411	1	1	1	1	1	1	1	1	1	1	2	LAWA0A05600g	KLTH0G15004g	LAME0G10066g	LAFA0E07008g	LACI0B04940g	LAFE0C07910g	LADA0F04698g	LANO0C05116g	LAMI0G06238g	SAKL0A07898g	YOR182C,YLR287C-A	RPS30B,RPS30A	Protein component of the small (40S) ribosomal subunit | Protein component of the small (40S) ribosomal subunit	cytoplasm (x2) | ribosome (x2)	structural molecule activity (x2) | structural constituent of ribosome (x2)	cytoplasmic translation (x2)	-	0	0	0	0	0	0	0	0	0	0	-	-	-	-	-	-	-	-	-	-
412	1	1	1	1	1	1	1	1	1	1	2	LAWA0A05754g	KLTH0G14850g	LAME0G09912g	LAFA0E06854g	LACI0B05094g	LAFE0C07756g	LADA0F04544g	LANO0C04962g	LAMI0G06392g	SAKL0A07744g	YOR185C,YLR293C	GSP2,GSP1	GTP binding protein (mammalian Ranp homolog) | Ran GTPase	cytoplasm (x1) | nucleus (x2) | membrane (x2)	GTPase activity (x2)	nuclear transport (x1) | nucleus organization (x2) | rRNA processing (x1)	-	0	0	0	0	0	0	0	0	0	0	-	-	-	-	-	-	-	-	-	-
413	1	1	1	1	1	1	1	1	1	1	2	LAWA0D12266g	KLTH0G01760g	LAME0H19680g	LAFA0D01684g	LACI0C08240g	LAFE0F16732g	LADA0G15192g	LANO0D01750g	LAMI0D02806g	SAKL0F01914g	YER031C,YGL210W	YPT31,YPT32	Rab family GTPase | Rab family GTPase involved in the exocytic pathway	mitochondrion (x2) | cytoplasm (x2) | mitochondrial envelope (x2) | Golgi apparatus (x2) | membrane (x2)	GTPase activity (x2)	endosomal transport (x2) | Golgi vesicle transport (x2) | exocytosis (x2)	-	0	0	0	0	0	0	0	0	0	0	-	-	-	-	-	-	-	-	-	-
414	1	1	1	1	1	1	1	1	1	1	2	LAWA0E08636g	KLTH0D08932g	LAME0H12662g	LAFA0C06700g	LACI0H19504g	LAFE0F06700g	LADA0C09120g	LANO0H13410g	LAMI0D00848g	SAKL0E10252g	YNL098C,YOR101W	RAS2,RAS1	GTP-binding protein | GTPase involved in G-protein signaling in adenylate cyclase activation	cytoplasm (x2) | endoplasmic reticulum (x1) | endomembrane system (x1) | nucleus (x2) | membrane (x1) | mitochondrion (x1) | plasma membrane (x2)	GTPase activity (x2) | ion binding (x1)	response to chemical stimulus (x1) | nucleobase-containing small molecule metabolic process (x1) | sporulation (x1) | pseudohyphal growth (x2) | signaling (x1)	-	0	0	0	0	0	0	0	0	0	0	-	-	-	-	-	-	-	-	-	-
415	1	1	1	1	1	1	1	1	1	1	2	LAWA0H05644g	KLTH0H06886g	LAME0C06788g	LAFA0C04764g	LACI0B05380g	LAFE0C07448g	LADA0A04082g	LANO0F02960g	LAMI0C00782g	SAKL0A07414g	YGL054C,YBR210W	ERV14,ERV15	COPII-coated vesicle protein | Protein involved in export of proteins from the endoplasmic reticulum	cytoplasm (x2) | membrane (x2) | cytoplasmic membrane-bounded vesicle (x1) | endoplasmic reticulum (x1) | endomembrane system (x2)	unknown (x2)	sporulation (x2) | cytokinesis (x2) | Golgi vesicle transport (x2) | cell budding (x1)	-	0	0	0	0	0	0	0	0	0	0	-	-	-	-	-	-	-	-	-	-
416	1	1	1	1	1	1	1	1	1	1	2	LAWA0G04214g	KLTH0F10362g	LAME0E05424g	LAFA0G09758g	LACI0F14224g	LAFE0E09032g	LADA0C02718g	LANO0G09758g	LAMI0E01970g	SAKL0H26004g	YHL034C,YLL046C	SBP1,RNP1	Protein that binds eIF4G and has a role in repression of translation | Ribonucleoprotein that contains two RNA recognition motifs (RRM)	cytoplasm (x2) | nucleolus (x1) | nucleus (x1)	RNA binding (x2)	other (x1) | regulation of translation (x1)	-	0	0	0	0	0	0	0	0	0	0	-	-	-	-	-	-	-	-	-	-
417	0	1	1	1	1	1	1	1	1	1	2	-	KLTH0H06776g	LAME0C06920g	LAFA0C04588g	LACI0B05490g	LAFE0C07316g	LADA0A03950g	LANO0F02828g	LAMI0G09032g	SAKL0A07304g	YBR214W,YGL056C	SDS24,SDS23	Protein involved in cell separation during budding | One of two S. cerevisiae homologs (Sds23p and Sds24p) of the S. pombe Sds23 protein, which is implicated in APC/cyclosome regulation	cytoplasm (x2) | nucleus (x1)	unknown (x2)	cytokinesis (x2) | endocytosis (x1)	-	1	0	0	0	0	0	0	0	0	0	LAWA0H05534g	-	-	-	-	-	-	-	-	-
418	1	1	1	1	1	1	1	1	1	2	1	LAWA0D07800g	KLTH0A03916g	LAME0A02168g	LAFA0A06194g	LACI0D01464g	LAFE0B05512g	LADA0A05556g	LANO0B03532g	LAMI0G12464g	SAKL0F08184g,SAKL0A01122g	YIL042C	PKP1	Mitochondrial protein kinase involved in negative regulation of pyruvate dehydrogenase complex activity by phosphorylating the ser-133 residue of the Pda1p subunit	mitochondrion (x1) | cytoplasm (x1)	kinase activity (x1)	peptidyl-amino acid modification (x1) | protein phosphorylation (x1)	-	0	0	0	0	0	0	0	0	0	0	-	-	-	-	-	-	-	-	-	-
419	1	1	1	1	1	1	1	1	1	1	2	LAWA0H05424g	KLTH0H06666g	LAME0C07030g	LAFA0C04478g	LACI0B05600g	LAFE0C07206g	LADA0A03840g	LANO0F02718g	LAMI0G08922g	SAKL0A07194g	YGL060W,YBR216C	YBP2,YBP1	Central kinetochore associated protein | Protein involved in cellular response to oxidative stress	cytoplasm (x1) | nucleus (x2) | chromosome (x1)	unknown (x2)	response to chemical stimulus (x1) | organelle fission (x1) | mitotic cell cycle (x1) | regulation of organelle organization (x1) | regulation of cell cycle (x1) | response to oxidative stress (x1)	-	0	0	0	0	0	0	0	0	0	0	-	-	-	-	-	-	-	-	-	-
420	1	1	1	1	1	1	1	1	1	1	2	LAWA0H05358g	KLTH0H06600g	LAME0C07096g	LAFA0C04368g	LACI0B05688g	LAFE0C07096g	LADA0A03774g	LANO0F02652g	LAMI0G08834g	SAKL0A07128g	YBR218C,YGL062W	PYC2,PYC1	Pyruvate carboxylase isoform | Pyruvate carboxylase isoform	cytoplasm (x2)	ligase activity (x2)	carbohydrate metabolic process (x2)	-	0	0	0	0	0	0	0	0	0	0	-	-	-	-	-	-	-	-	-	-
421	1	1	1	1	1	1	1	1	1	1	2	LAWA0G15984g	KLTH0A06050g	LAME0H14598g	LAFA0F14180g	LACI0G23618g	LAFE0C02234g	LADA0B05798g	LANO0A02190g	LAMI0C01618g	SAKL0A02046g	YMR207C,YNR016C	HFA1,ACC1	Mitochondrial acetyl-coenzyme A carboxylase | Acetyl-CoA carboxylase, biotin containing enzyme	mitochondrion (x2) | cytoplasm (x1) | membrane (x1) | endoplasmic reticulum (x1) | endomembrane system (x2)	ligase activity (x2)	nuclear transport (x2) | nucleus organization (x1) | lipid metabolic process (x1) | protein targeting (x1)	-	0	0	0	0	0	0	0	0	0	0	-	-	-	-	-	-	-	-	-	-
422	1	1	1	1	1	1	1	1	1	1	2	LAWA0H05292g	KLTH0H06534g	LAME0C07162g	LAFA0C04302g	LACI0B05776g	LAFE0C06986g	LADA0A03708g	LANO0F02586g	LAMI0G08768g	SAKL0A07040g	YBR220C,YBR219C	Unknown name,Unknown name	Putative protein of unknown function | Putative protein of unknown function	membrane (x2)	unknown (x2)	unknown (x2)	-	0	0	0	0	0	0	0	0	0	0	-	-	-	-	-	-	-	-	-	-
423	1	1	1	1	2	1	1	1	1	1	1	LAWA0H05182g	KLTH0H06402g	LAME0C07294g	LAFA0C04192g	LACI0B05886g,LACI0G19086g	LAFE0C06876g	LADA0A03598g	LANO0F02476g	LAMI0F08812g	SAKL0A06930g	YBR225W	Unknown name	Putative protein of unknown function	unknown (x1)	unknown (x1)	unknown (x1)	-	0	0	0	0	0	0	0	0	0	0	-	-	-	-	-	-	-	-	-	-
424	1	1	1	1	1	1	1	1	1	1	2	LAWA0H00914g	KLTH0C00528g	LAME0E00320g	LAFA0F22276g	LACI0C00232g	LAFE0C13806g	LADA0B11342g	LANO0F17392g	LAMI0F03312g	SAKL0G19756g	YKL024C,YKL023C-A	URA6,Unknown name	Uridylate kinase, catalyzes the seventh enzymatic step in the de novo biosynthesis of pyrimidines, converting uridine monophosphate (UMP) into uridine-5'-diphosphate (UDP) | Putative protein of unknown function	nucleus (x1) | cytoplasm (x1) | unknown (x1)	kinase activity (x1) | unknown (x1)	nucleobase-containing small molecule metabolic process (x1) | unknown (x1)	-	0	0	0	0	0	0	0	0	0	0	-	-	-	-	-	-	-	-	-	-
425	1	1	1	1	1	1	1	1	1	1	2	LAWA0H01024g	KLTH0C00638g	LAME0E00430g	LAFA0F22166g	LACI0C00342g	LAFE0C13696g	LADA0B11232g	LANO0F17282g	LAMI0F03422g	SAKL0G19646g	YIR033W,YKL020C	MGA2,SPT23	ER membrane protein involved in regulation of OLE1 transcription | ER membrane protein involved in regulation of OLE1 transcription	cytoplasm (x2) | membrane (x2) | nucleus (x2) | endoplasmic reticulum (x2) | endomembrane system (x2)	DNA binding (x1) | unknown (x1)	response to chemical stimulus (x2) | transcription from RNA polymerase II promoter (x1) | lipid metabolic process (x2)	-	0	0	0	0	0	0	0	0	0	0	-	-	-	-	-	-	-	-	-	-
426	1	1	1	1	1	1	1	1	1	1	2	LAWA0G09956g	KLTH0G09702g	LAME0D05556g	LAFA0E02432g	LACI0F16886g	LAFE0E11672g	LADA0E10286g	LANO0H07294g	LAMI0C07910g	SAKL0E08404g	YNL053W,YIL113W	MSG5,SDP1	Dual-specificity protein phosphatase | Stress-inducible dual-specificity MAP kinase phosphatase, negatively regulates Slt2p MAP kinase by direct dephosphorylation, diffuse localization under normal conditions shifts to punctate localization after heat shock	cytoplasm (x2) | nucleus (x2)	phosphatase activity (x2)	response to chemical stimulus (x2) | protein phosphorylation (x1) | conjugation (x1) | nuclear transport (x1) | regulation of protein modification process (x2) | signaling (x2) | regulation of transport (x1) | cell wall organization or biogenesis (x1) | protein dephosphorylation (x2)	-	0	0	0	0	0	0	0	0	0	0	-	-	-	-	-	-	-	-	-	-
427	1	1	1	1	1	1	1	1	1	1	2	LAWA0H01376g	KLTH0C00990g	LAME0E00782g	LAFA0F21814g	LACI0C00694g	LAFE0C13344g	LADA0H20032g	LANO0F16930g	LAMI0A04808g	SAKL0G19294g	YKL011C,YIR021W	CCE1,MRS1	Mitochondrial cruciform cutting endonuclease | Splicing protein	mitochondrion (x2) | cytoplasm (x1) | mitochondrial envelope (x1) | membrane (x2)	RNA binding (x1) | nuclease activity (x1)	RNA splicing (x1) | mitochondrion organization (x1)	-	0	0	0	0	0	0	0	0	0	0	-	-	-	-	-	-	-	-	-	-
428	1	1	1	1	1	1	1	0	1	1	2	LAWA0B10396g	KLTH0F17314g	LAME0D01684g	LAFA0D15786g	LACI0H24080g	LAFE0F02058g	LADA0A01794g	-	LAMI0E12508g	SAKL0G01166g	YKR072C,YOR054C	SIS2,VHS3	Negative regulatory subunit of protein phosphatase 1 Ppz1p and also a subunit of the phosphopantothenoylcysteine decarboxylase (PPCDC | Negative regulatory subunit of protein phosphatase 1 Ppz1p and also a subunit of the phosphopantothenoylcysteine decarboxylase (PPCDC	cytoplasm (x2) | nucleus (x1)	enzyme regulator activity (x2) | lyase activity (x2)	mitotic cell cycle (x1) | cofactor metabolic process (x2) | response to osmotic stress (x1) | nucleobase-containing small molecule metabolic process (x2) | cellular ion homeostasis (x1) | regulation of cell cycle (x1)	-	0	0	0	0	0	0	0	1	0	0	-	-	-	-	-	-	-	LANO0H23552g	-	-
429	1	1	1	1	1	1	1	1	1	1	2	LAWA0A07294g	KLTH0G13178g	LAME0G08284g	LAFA0E05182g	LACI0H12376g	LAFE0H08922g	LADA0F02872g	LANO0C06898g	LAMI0H16050g	SAKL0H16500g	YLR099C,YDR125C	ICT1,ECM18	Lysophosphatidic acid acyltransferase | Protein of unknown function	mitochondrion (x1) | cytoplasm (x1) | unknown (x1)	transferase activity, transferring acyl groups (x1) | unknown (x1)	lipid metabolic process (x1) | unknown (x1)	-	0	0	0	0	0	0	0	0	0	0	-	-	-	-	-	-	-	-	-	-
430	1	1	1	1	1	1	1	1	1	1	2	LAWA0H01816g	KLTH0C01474g	LAME0E01244g	LAFA0F21308g	LACI0C01112g	LAFE0C12816g	LADA0H19570g	LANO0F16468g	LAMI0G02102g	SAKL0H02618g	YHR158C,YGR238C	KEL1,KEL2	Protein required for proper cell fusion and cell morphology | Protein that negatively regulates mitotic exit	cytoplasm (x2) | cellular bud (x1) | site of polarized growth (x2)	unknown (x2)	mitotic cell cycle (x1) | organelle fission (x2) | conjugation (x1) | membrane fusion (x2) | regulation of cell cycle (x2) | cell morphogenesis (x2)	-	0	0	0	0	0	0	0	0	0	0	-	-	-	-	-	-	-	-	-	-
431	1	1	1	1	1	1	1	1	1	1	2	LAWA0D08350g	KLTH0G05632g	LAME0H10638g	LAFA0E13366g	LACI0C04654g	LAFE0F13102g	LADA0G07250g	LANO0H11232g	LAMI0H02542g	SAKL0G06886g	YOR019W,YDR475C	Unknown name,JIP4	Protein of unknown function | Protein of unknown function	cytoplasm (x1) | ribosome (x1) | unknown (x1)	unknown (x2)	other (x1) | unknown (x1)	-	0	0	0	0	0	0	0	0	0	0	-	-	-	-	-	-	-	-	-	-
432	0	1	1	1	1	1	1	1	1	1	2	-	KLTH0E02420g	LAME0G18074g	LAFA0G17612g	LACI0F03334g	LAFE0D08240g	LADA0G01398g	LANO0B04544g	LAMI0B03928g	SAKL0G07326g	YDR264C,YOR034C	AKR1,AKR2	Palmitoyl transferase involved in protein palmitoylation | Ankyrin repeat-containing protein	cytoplasm (x2) | Golgi apparatus (x2) | membrane (x2)	transferase activity, transferring acyl groups (x2)	response to chemical stimulus (x1) | protein lipidation (x2) | endocytosis (x2) | protein targeting (x2) | protein acylation (x1) | regulation of transport (x1) | conjugation (x1) | signaling (x1)	-	1	0	0	0	0	0	0	0	0	0	LAWA0B02256g	-	-	-	-	-	-	-	-	-
433	1	1	1	1	1	1	1	1	1	1	2	LAWA0G10704g	KLTH0A02640g	LAME0A03356g	LAFA0A05050g	LACI0D02630g	LAFE0B06678g	LADA0A06700g	LANO0B02388g	LAMI0F12530g	SAKL0B02376g	YFL004W,YPL019C	VTC2,VTC3	Subunit of vacuolar transporter chaperone (VTC) complex | Subunit of vacuolar transporter chaperone (VTC) complex	vacuole (x2) | cytoplasm (x2) | endoplasmic reticulum (x2) | membrane (x2)	unknown (x2)	membrane fusion (x2) | membrane invagination (x2) | vacuole organization (x2)	-	0	0	0	0	0	0	0	0	0	0	-	-	-	-	-	-	-	-	-	-
434	1	1	1	1	1	1	1	1	1	1	2	LAWA0F15214g	KLTH0C01694g	LAME0E01486g	LAFA0E02542g	LACI0C01310g	LAFE0C12618g	LADA0H19350g	LANO0F16270g	LAMI0G02322g	SAKL0G15488g	YGR230W,YHR152W	BNS1,SPO12	Protein of unknown function | Nucleolar protein of unknown function	nucleus (x1) | nucleolus (x1) | unknown (x1)	unknown (x2)	regulation of cell cycle (x1) | mitotic cell cycle (x1) | other (x1) | organelle fission (x1)	-	0	0	0	0	0	0	0	0	0	0	-	-	-	-	-	-	-	-	-	-
435	1	1	1	1	1	1	1	1	1	2	1	LAWA0F15192g	KLTH0C01760g	LAME0E01376g	LAFA0E02652g	LACI0C01332g	LAFE0C12596g	LADA0H19328g	LANO0F16248g	LAMI0G02344g	SAKL0G15466g,SAKL0H22528g	YGR229C	SMI1	Protein involved in the regulation of cell wall synthesis	cellular bud (x1) | site of polarized growth (x1)	unknown (x1)	cell wall organization or biogenesis (x1) | mitotic cell cycle (x1) | regulation of cell cycle (x1)	-	0	0	0	0	0	0	0	0	0	0	-	-	-	-	-	-	-	-	-	-
436	1	1	1	1	1	1	1	1	1	1	2	LAWA0F01068g	KLTH0C01936g	LAME0E01640g	LAFA0E02740g	LACI0C01508g	LAFE0C12420g	LADA0H19152g	LANO0F16072g	LAMI0G02542g	SAKL0G15290g	YHR149C,YGR221C	SKG6,TOS2	Integral membrane protein | Protein involved in localization of Cdc24p to the site of bud growth	cytoplasm (x1) | site of polarized growth (x2) | cellular bud (x1) | cell cortex (x1) | membrane (x2)	unknown (x2)	cell budding (x1) | unknown (x1)	-	0	0	0	0	0	0	0	0	0	0	-	-	-	-	-	-	-	-	-	-
437	1	1	1	1	1	1	1	1	1	1	2	LAWA0F12178g	KLTH0E12826g	LAME0H07558g	LAFA0E10264g	LACI0G12442g	LAFE0G14312g	LADA0D04390g	LANO0E08636g	LAMI0E07426g	SAKL0H09768g	YPL081W,YBR189W	RPS9A,RPS9B	Protein component of the small (40S) ribosomal subunit | Protein component of the small (40S) ribosomal subunit	cytoplasm (x2) | ribosome (x2)	RNA binding (x1) | rRNA binding (x1) | structural molecule activity (x2) | structural constituent of ribosome (x2)	translational elongation (x1) | rRNA processing (x2) | ribosomal small subunit biogenesis (x1) | cytoplasmic translation (x2) | regulation of translation (x1)	-	0	0	0	0	0	0	0	0	0	0	-	-	-	-	-	-	-	-	-	-
438	1	1	1	1	1	1	1	1	1	1	2	LAWA0H11100g	KLTH0H12892g	LAME0E10638g	LAFA0G14950g	LACI0C02080g	LAFE0F10528g	LADA0H16578g	LANO0G14972g	LAMI0A06260g	SAKL0D09526g	YOR018W,YFR022W	ROD1,ROG3	Membrane protein, binds the ubiquitin ligase Rsp5p via its 2 PY motifs | Protein that binds the ubiquitin ligase Rsp5p via its 2 PY motifs	unknown (x1) | plasma membrane (x1) | membrane (x1)	enzyme binding (x2)	response to chemical stimulus (x2) | endocytosis (x1)	-	0	0	0	0	0	0	0	0	0	0	-	-	-	-	-	-	-	-	-	-
439	1	1	1	1	1	1	1	1	1	1	2	LAWA0H08064g	KLTH0H09592g	LAME0H03576g	LAFA0E16622g	LACI0H16270g	LAFE0H13014g	LADA0H11980g	LANO0F05578g	LAMI0H14224g	SAKL0D05764g	YJL084C,YKR021W	ALY2,ALY1	Alpha arrestin that controls nutrient-mediated intracellular sorting of permease Gap1p | Alpha arrestin that controls nutrient-mediated intracellular sorting of permease Gap1p	cytoplasm (x2)	enzyme binding (x2) | protein binding, bridging (x1)	regulation of transport (x2) | endocytosis (x2)	-	0	0	0	0	0	0	0	0	0	0	-	-	-	-	-	-	-	-	-	-
440	1	1	1	1	1	1	1	1	1	1	2	LAWA0F04764g	KLTH0C05588g	LAME0E03158g	LAFA0D04654g	LACI0D05556g	LAFE0B09758g	LADA0H06920g	LANO0F12508g	LAMI0A07272g	SAKL0F13530g	YBL101C,YPR030W	ECM21,CSR2	Protein involved in regulating endocytosis of plasma membrane proteins | Nuclear ubiquitin protein ligase binding protein	cytoplasm (x1) | nucleus (x1)	enzyme binding (x2)	cell wall organization or biogenesis (x1) | transcription from RNA polymerase II promoter (x2) | endocytosis (x1)	-	0	0	0	0	0	0	0	0	0	0	-	-	-	-	-	-	-	-	-	-
441	0	1	1	1	1	1	1	1	1	1	2	-	KLTH0H12980g	LAME0E10704g	LAFA0G15016g	LACI0C02146g	LAFE0F10594g	LADA0H16644g	LANO0G15038g	LAMI0A06326g	SAKL0D09702g	YHR016C,YFR024C-A	YSC84,LSB3	Actin-binding protein | Protein containing a C-terminal SH3 domain	site of polarized growth (x1) | cytoplasm (x1) | cell cortex (x2) | mitochondrion (x1) | cytoskeleton (x1) | cellular bud (x1)	unknown (x1) | cytoskeletal protein binding (x1)	cytoskeleton organization (x1) | other (x1) | endocytosis (x1)	-	1	0	0	0	0	0	0	0	0	0	LAWA0H11166g	-	-	-	-	-	-	-	-	-
442	1	1	1	1	1	1	1	1	1	1	2	LAWA0D11650g	KLTH0G02332g	LAME0H19152g	LAFA0D02234g	LACI0C07778g	LAFE0F16270g	LADA0G14708g	LANO0D02278g	LAMI0F11364g	SAKL0F02486g	YGR136W,YPR154W	LSB1,PIN3	Negative regulator of actin nucleation-promoting factor activity | Negative regulator of actin nucleation-promoting factor activity	nucleus (x2) | cytoplasm (x2) | cytoskeleton (x2) | cell cortex (x2)	unknown (x2)	cytoskeleton organization (x2) | protein complex biogenesis (x2) | regulation of organelle organization (x2)	-	0	0	0	0	0	0	0	0	0	0	-	-	-	-	-	-	-	-	-	-
443	1	1	1	1	1	1	1	0	1	1	2	LAWA0H11474g	KLTH0H13310g	LAME0E11210g	LAFA0G15434g	LACI0C02366g	LAFE0F10814g	LADA0H17106g	-	LAMI0A06568g	SAKL0D10054g	YOL019W,YFR012W	Unknown name,DCV1	Protein of unknown function | Protein of unknown function	vacuole (x1) | cytoplasm (x2) | plasma membrane (x1) | membrane (x1)	unknown (x2)	unknown (x2)	-	0	0	0	0	0	0	0	1	0	0	-	-	-	-	-	-	-	LANO0G15456g	-	-
444	1	1	1	1	1	1	1	1	1	1	2	LAWA0F05864g	KLTH0C06732g	LAME0F10990g	LAFA0D05710g	LACI0H01398g	LAFE0B01530g	LADA0H08900g	LANO0F11320g	LAMI0D12684g	SAKL0F12430g	YBL067C,YER098W	UBP13,UBP9	Putative ubiquitin-specific protease that cleaves Ub-protein fusions | Ubiquitin-specific protease that cleaves ubiquitin-protein fusions	cytoplasm (x1) | unknown (x1)	peptidase activity (x2)	protein modification by small protein conjugation or removal (x1) | unknown (x1)	-	0	0	0	0	0	0	0	0	0	0	-	-	-	-	-	-	-	-	-	-
445	1	1	1	1	1	1	1	1	1	1	2	LAWA0B00672g	KLTH0E00814g	LAME0D00452g	LAFA0D17040g	LACI0H25378g	LAFE0F00628g	LADA0A00474g	LANO0H24828g	LAMI0B00408g	SAKL0E15136g	YIL156W,YKR098C	UBP7,UBP11	Ubiquitin-specific protease that cleaves ubiquitin-protein fusions | Ubiquitin-specific protease	cytoplasm (x1) | unknown (x1)	peptidase activity (x2)	protein modification by small protein conjugation or removal (x1) | unknown (x1)	-	0	0	0	0	0	0	0	0	0	0	-	-	-	-	-	-	-	-	-	-
446	0	1	1	1	1	1	1	1	1	1	2	-	KLTH0H14212g	LAME0E12134g	LAFA0G16292g	LACI0C03290g	LAFE0F11782g	LADA0H18052g	LANO0G16314g	LAMI0H06854g	SAKL0D11088g	YEL022W,YJR031C	GEA2,GEA1	Guanine nucleotide exchange factor for ADP ribosylation factors (ARFs) | Guanine nucleotide exchange factor for ADP ribosylation factors (ARFs)	cytoplasm (x2) | cytoplasmic membrane-bounded vesicle (x2) | Golgi apparatus (x1) | membrane (x2)	enzyme regulator activity (x2)	vesicle organization (x2) | cytoskeleton organization (x2) | response to starvation (x2) | Golgi vesicle transport (x1)	-	1	0	0	0	0	0	0	0	0	0	LAWA0H12332g	-	-	-	-	-	-	-	-	-
447	1	1	1	1	1	1	1	1	1	1	2	LAWA0G16622g	KLTH0A06666g	LAME0H15214g	LAFA0F13608g	LACI0G24168g	LAFE0C01442g	LADA0F14378g	LANO0A01596g	LAMI0G11694g	SAKL0A01364g	YCR069W,YNR028W	CPR4,CPR8	Peptidyl-prolyl cis-trans isomerase (cyclophilin) | Peptidyl-prolyl cis-trans isomerase (cyclophilin)	vacuole (x1) | cytoplasm (x1) | membrane (x1)	isomerase activity (x2)	unknown (x2)	-	0	0	0	0	0	0	0	0	0	0	-	-	-	-	-	-	-	-	-	-
448	1	1	1	1	1	1	1	1	1	1	1	LAWA0D03642g	KLTH0E06908g	LAME0H15918g	LAFA0D11452g	LACI0F07712g	LAFE0D04082g	LADA0G03950g	LANO0F08240g	LAMI0D07118g	SAKL0H24552g	YER125W	RSP5	E3 ubiquitin ligase of the NEDD4 family	Golgi apparatus (x1) | site of polarized growth (x1) | cytoplasm (x1) | nucleus (x1) | membrane (x1) | mitochondrion (x1) | cellular bud (x1) | plasma membrane (x1)	ligase activity (x1) | lipid binding (x1) | ion binding (x1) | small conjugating protein binding (x1)	response to chemical stimulus (x1) | protein modification by small protein conjugation or removal (x1) | cofactor metabolic process (x1) | regulation of organelle organization (x1) | chromatin organization (x1) | rRNA processing (x1) | tRNA processing (x1) | endocytosis (x1) | regulation of transport (x1) | endosomal transport (x1) | ribosomal subunit export from nucleus (x1) | transcription from…	-	0	0	0	0	0	0	1	0	0	0	-	-	-	-	-	-	LADA0D03048g	-	-	-
449	1	1	1	1	1	1	1	1	1	1	2	LAWA0A07756g	KLTH0G13662g	LAME0G08768g	LAFA0E05644g	LACI0H12860g	LAFE0H09428g	LADA0F03334g	LANO0C06392g	LAMI0H15588g	SAKL0H17006g	YDR111C,YLR089C	ALT2,ALT1	Catalytically inactive alanine transaminase | Alanine transaminase (glutamic pyruvic transaminase)	mitochondrion (x2) | cytoplasm (x1) | nucleus (x1)	other (x2)	cellular amino acid metabolic process (x1) | unknown (x1)	-	0	0	0	0	0	0	0	0	0	0	-	-	-	-	-	-	-	-	-	-
450	1	1	1	1	1	1	1	1	1	1	2	LAWA0D08174g	KLTH0G05830g	LAME0H10462g	LAFA0E13190g	LACI0C04478g	LAFE0F12926g	LADA0E06568g	LANO0H11034g	LAMI0D04588g	SAKL0F14212g	YPR043W,YJR094W-A	RPL43A,RPL43B	Ribosomal 60S subunit protein L43A | Ribosomal 60S subunit protein L43B	cytoplasm (x2) | ribosome (x2)	structural molecule activity (x2) | structural constituent of ribosome (x2)	cytoplasmic translation (x2)	-	0	0	0	0	0	0	0	0	0	0	-	-	-	-	-	-	-	-	-	-
451	1	1	1	1	1	1	1	1	1	1	2	LAWA0A03092g	KLTH0C08690g	LAME0F05710g	LAFA0F04214g	LACI0E03400g	LAFE0E03202g	LADA0B07954g	LANO0A04346g	LAMI0H19570g	SAKL0C08602g	YOL068C,YDL042C	HST1,SIR2	NAD(+)-dependent histone deacetylase | Conserved NAD+ dependent histone deacetylase of the Sirtuin family	nucleolus (x2) | nucleus (x1) | chromosome (x2)	hydrolase activity, acting on carbon-nitrogen (but not peptide) bonds (x2)	histone modification (x2) | regulation of DNA metabolic process (x1) | chromatin organization (x1) | response to DNA damage stimulus (x2) | DNA repair (x1) | DNA recombination (x2) | DNA replication (x1)	-	0	0	0	0	0	0	0	0	0	0	-	-	-	-	-	-	-	-	-	-
452	1	1	1	1	1	1	2	1	1	1	1	LAWA0D08482g	KLTH0G05500g	LAME0H10748g	LAFA0E13476g	LACI0C04786g	LAFE0F13234g	LADA0G07360g,LADA0D03070g	LANO0H11342g	LAMI0H02674g	SAKL0G06754g	YOR023C	AHC1	Subunit of the Ada histone acetyltransferase complex, required for structural integrity of the complex	nucleus (x1)	transferase activity, transferring acyl groups (x1)	histone modification (x1) | chromatin organization (x1) | peptidyl-amino acid modification (x1) | protein acylation (x1)	-	0	0	0	0	0	0	0	0	0	0	-	-	-	-	-	-	-	-	-	-
453	1	1	1	1	1	1	2	1	1	1	1	LAWA0F14180g	KLTH0E14806g	LAME0F03048g	LAFA0F16380g	LACI0G14488g	LAFE0G16424g	LADA0D02014g,LADA0G09648g	LANO0E06590g	LAMI0E09428g	SAKL0B07106g	YPR051W	MAK3	Catalytic subunit of N-terminal acetyltransferase of the NatC type	cytoplasm (x1)	transferase activity, transferring acyl groups (x1)	protein acylation (x1)	-	0	0	0	0	0	0	0	0	0	0	-	-	-	-	-	-	-	-	-	-
454	1	1	1	1	1	1	1	1	1	1	2	LAWA0D08636g	KLTH0G05346g	LAME0H10880g	LAFA0E13608g	LACI0C04940g	LAFE0F13388g	LADA0G07492g	LANO0H11474g	LAMI0H02806g	SAKL0G06534g	YHR010W,YDR471W	RPL27A,RPL27B	Ribosomal 60S subunit protein L27A | Ribosomal 60S subunit protein L27B	cytoplasm (x2) | ribosome (x2)	structural molecule activity (x2) | structural constituent of ribosome (x2)	cytoplasmic translation (x2)	-	0	0	0	0	0	0	0	0	0	0	-	-	-	-	-	-	-	-	-	-
455	1	1	1	1	1	1	0	1	1	2	2	LAWA0E13410g	KLTH0D13618g	LAME0F02322g	LAFA0D09890g	LACI0G04698g	LAFE0E07118g	-	LANO0H18052g	LAMI0A03158g	SAKL0H03894g,SAKL0H26224g	YLR375W,YDL048C	STP3,STP4	Zinc-finger protein of unknown function | Protein containing a Kruppel-type zinc-finger domain	mitochondrion (x1) | cytoplasm (x1) | nucleus (x2)	DNA binding (x2)	unknown (x2)	-	0	0	0	0	0	0	0	0	0	0	-	-	-	-	-	-	-	-	-	-
456	1	1	1	1	1	1	1	1	1	1	2	LAWA0F06260g	KLTH0C07172g	LAME0H13916g	LAFA0F05578g	LACI0E04808g	LAFE0E04654g	LADA0B06612g	LANO0A02938g	LAMI0C05358g	SAKL0D03146g	YDR043C,YBR066C	NRG1,NRG2	Transcriptional repressor | Transcriptional repressor	nucleus (x2)	protein binding transcription factor activity (x2) | transcription factor binding (x1) | DNA binding (x1) | nucleic acid binding transcription factor activity (x1)	response to osmotic stress (x2) | response to chemical stimulus (x2) | pseudohyphal growth (x2) | invasive growth in response to glucose limitation (x2) | transcription from RNA polymerase II promoter (x2)	-	0	0	0	0	0	0	0	0	0	0	-	-	-	-	-	-	-	-	-	-
457	1	1	1	1	1	1	1	1	1	1	2	LAWA0H08592g	KLTH0H10208g	LAME0H04082g	LAFA0E16050g	LACI0H16776g	LAFE0H13542g	LADA0H12574g	LANO0F06106g	LAMI0H11606g	SAKL0D06380g	YBR284W,YJL070C	Unknown name,Unknown name	Putative metallo-dependent hydrolase superfamily protein | Putative metallo-dependent hydrolase superfamily protein	mitochondrion (x1) | cytoplasm (x1) | unknown (x1)	unknown (x2)	unknown (x2)	-	0	0	0	0	0	0	0	0	0	0	-	-	-	-	-	-	-	-	-	-
458	0	1	1	1	1	1	1	1	1	1	2	-	KLTH0G04928g	LAME0H11320g	LAFA0E14026g	LACI0C05358g	LAFE0F13806g	LADA0G07932g	LANO0H11892g	LAMI0G10770g	SAKL0G06116g	YML034W,YDR458C	SRC1,HEH2	Inner nuclear membrane protein | Inner nuclear membrane (INM) protein	nucleus (x2) | endomembrane system (x2)	unknown (x2)	chromosome segregation (x1) | organelle fission (x1) | unknown (x1)	-	1	0	0	0	0	0	0	0	0	0	LAWA0D09076g	-	-	-	-	-	-	-	-	-
459	1	1	1	1	1	1	1	1	1	1	2	LAWA0D09274g	KLTH0G04730g	LAME0H11518g	LAFA0E14224g	LACI0C05556g	LAFE0F14004g	LADA0G08130g	LANO0H12090g	LAMI0G10968g	SAKL0G05940g	YML028W,YDR453C	TSA1,TSA2	Thioredoxin peroxidase | Stress inducible cytoplasmic thioredoxin peroxidase	cytoplasm (x2)	oxidoreductase activity (x2) | unfolded protein binding (x1)	response to chemical stimulus (x1) | regulation of cell cycle (x1) | response to oxidative stress (x1) | protein folding (x2) | response to DNA damage stimulus (x2)	-	0	0	0	0	0	0	0	0	0	0	-	-	-	-	-	-	-	-	-	-
460	1	1	1	1	1	0	1	1	1	1	2	LAWA0D09318g	KLTH0G04686g	LAME0H11562g	LAFA0E14268g	LACI0C05600g	-	LADA0G08174g	LANO0H12134g	LAMI0G11012g	SAKL0G05896g	YML027W,YDR451C	YOX1,YHP1	Homeobox transcriptional repressor | Homeobox transcriptional repressor	cytoplasm (x2) | nucleus (x1) | chromosome (x2)	protein binding transcription factor activity (x2) | DNA binding (x2)	mitotic cell cycle (x2) | transcription from RNA polymerase II promoter (x2)	-	0	0	0	0	0	1	0	0	0	0	-	-	-	-	-	LAFE0F14070g	-	-	-	-
461	1	1	1	1	1	1	1	1	1	1	2	LAWA0D09340g	KLTH0G04664g	LAME0H11584g	LAFA0E14290g	LACI0C05622g	LAFE0F14092g	LADA0G08196g	LANO0H12156g	LAMI0G11034g	SAKL0G05874g	YML026C,YDR450W	RPS18B,RPS18A	Protein component of the small (40S) ribosomal subunit | Protein component of the small (40S) ribosomal subunit	mitochondrion (x2) | cytoplasm (x2) | ribosome (x2)	structural molecule activity (x2) | structural constituent of ribosome (x2)	nuclear transport (x2) | nucleobase-containing compound transport (x2) | rRNA processing (x2) | ribosomal small subunit biogenesis (x2) | cytoplasmic translation (x2)	-	0	0	0	0	0	0	0	0	0	0	-	-	-	-	-	-	-	-	-	-
462	1	1	1	1	1	1	1	1	1	1	2	LAWA0D09428g	KLTH0G04576g	LAME0H11672g	LAFA0E14378g	LACI0C05710g	LAFE0F14180g	LADA0G08284g	LANO0H12244g	LAMI0G11122g	SAKL0G05764g	YDR447C,YML024W	RPS17B,RPS17A	Ribosomal protein 51 (rp51) of the small (40s) subunit | Ribosomal protein 51 (rp51) of the small (40s) subunit	cytoplasm (x2) | ribosome (x2)	structural molecule activity (x2) | structural constituent of ribosome (x2)	organelle assembly (x2) | ribosomal small subunit biogenesis (x2) | cytoplasmic translation (x2) | ribosome assembly (x2)	-	0	0	0	0	0	0	0	0	0	0	-	-	-	-	-	-	-	-	-	-
463	1	1	1	1	1	1	1	1	1	1	2	LAWA0G03356g	KLTH0F09460g	LAME0E04588g	LAFA0G08922g	LACI0F15104g	LAFE0E09890g	LADA0C01860g	LANO0G08900g	LAMI0E02806g	SAKL0E06578g	YGL144C,YDL109C	ROG1,Unknown name	Protein with putative serine active lipase domain | Putative lipase	unknown (x2)	unknown (x1) | other (x1)	lipid metabolic process (x2)	-	0	0	0	0	0	0	0	0	0	0	-	-	-	-	-	-	-	-	-	-
464	1	1	1	1	1	1	1	1	1	1	2	LAWA0D09560g	KLTH0G04444g	LAME0H11804g	LAFA0E14510g	LACI0C05842g	LAFE0F14312g	LADA0G08416g	LANO0H12376g	LAMI0G11232g	SAKL0G05588g	YML022W,YDR441C	APT1,APT2	Adenine phosphoribosyltransferase | Potential adenine phosphoribosyltransferase	cytoplasm (x2) | nucleus (x1)	transferase activity, transferring glycosyl groups (x1) | unknown (x2)	nucleobase-containing small molecule metabolic process (x1) | unknown (x1)	-	0	0	0	0	0	0	0	0	0	0	-	-	-	-	-	-	-	-	-	-
465	0	1	1	1	1	1	1	1	1	1	2	-	KLTH0G04312g	LAME0H11936g	LAFA0E14642g	LACI0C05974g	LAFE0F14444g	LADA0G08548g	LANO0H12508g	LAMI0G11364g	SAKL0G05456g	YML018C,YDR438W	Unknown name,THI74	Protein of unknown function | Mitochondrial transporter repressible by thiamine	mitochondrion (x2) | cytoplasm (x2) | vacuole (x1) | membrane (x1)	unknown (x2)	unknown (x2)	-	1	0	0	0	0	0	0	0	0	0	LAWA0D09692g	-	-	-	-	-	-	-	-	-
466	1	1	1	1	1	1	1	1	1	2	1	LAWA0B12552g	KLTH0F19514g	LAME0C09076g	LAFA0C02322g	LACI0F00826g	LAFE0G18668g	LADA0D00496g	LANO0F00650g	LAMI0C00650g	SAKL0C13530g,SAKL0A10098g	YOL141W	PPM2	AdoMet-dependent tRNA methyltransferase also involved in methoxycarbonylation	mitochondrion (x1) | cytoplasm (x1)	methyltransferase activity (x1)	nucleobase-containing small molecule metabolic process (x1) | RNA modification (x1) | tRNA processing (x1)	-	0	0	0	0	0	0	0	0	0	0	-	-	-	-	-	-	-	-	-	-
467	1	1	1	1	1	1	1	1	1	1	2	LAWA0D10220g	KLTH0G03784g	LAME0G13806g	LAFA0E21880g	LACI0C06480g	LAFE0F14972g	LADA0G13234g	LANO0D03576g	LAMI0D11562g	SAKL0G04950g	YML007W,YDR423C	YAP1,CAD1	Basic leucine zipper (bZIP) transcription factor | AP-1-like basic leucine zipper (bZIP) transcriptional activator	cytoplasm (x2) | nucleus (x2)	DNA binding (x2) | nucleic acid binding transcription factor activity (x2)	response to chemical stimulus (x2) | response to heat (x1) | response to oxidative stress (x1) | transcription from RNA polymerase II promoter (x2)	-	0	0	0	0	0	0	0	0	0	0	-	-	-	-	-	-	-	-	-	-
468	1	1	1	1	1	1	1	1	1	1	2	LAWA0D12178g	KLTH0G01848g	LAME0H19570g	LAFA0D01816g	LACI0C08152g	LAFE0F16644g	LADA0G15104g	LANO0D01860g	LAMI0F11826g	SAKL0F02002g	YGL208W,YER027C	SIP2,GAL83	One of three beta subunits of the Snf1 kinase complex | One of three possible beta-subunits of the Snf1 kinase complex	cytoplasm (x2) | membrane (x1) | nucleus (x1) | plasma membrane (x1) | endomembrane system (x1)	kinase activity (x2)	response to starvation (x2) | invasive growth in response to glucose limitation (x2) | protein complex biogenesis (x2) | signaling (x1) | protein phosphorylation (x2)	-	0	0	0	0	0	0	0	0	0	0	-	-	-	-	-	-	-	-	-	-
469	1	1	1	1	1	1	1	1	1	1	2	LAWA0D10352g	KLTH0G03630g	LAME0G13674g	LAFA0E21748g	LACI0C06634g	LAFE0F15126g	LADA0G13542g	LANO0D03444g	LAMI0D11408g	SAKL0G04708g	YEL054C,YDR418W	RPL12A,RPL12B	Ribosomal 60S subunit protein L12A | Ribosomal 60S subunit protein L12B	cytoplasm (x2) | ribosome (x2)	structural molecule activity (x2) | structural constituent of ribosome (x2)	organelle assembly (x2) | ribosome assembly (x2) | cytoplasmic translation (x2) | ribosomal large subunit biogenesis (x2)	-	0	0	0	0	0	0	0	0	0	0	-	-	-	-	-	-	-	-	-	-
470	1	1	1	1	1	1	1	1	1	1	2	LAWA0B04170g	KLTH0E04752g	LAME0H17986g	LAFA0D13520g	LACI0F05556g	LAFE0D06238g	LADA0H07822g	LANO0F10286g	LAMI0B04632g	SAKL0F07304g	YIL018W,YFR031C-A	RPL2B,RPL2A	Ribosomal 60S subunit protein L2B | Ribosomal 60S subunit protein L2A	cytoplasm (x2) | ribosome (x2)	structural molecule activity (x2) | structural constituent of ribosome (x2)	cytoplasmic translation (x2)	-	0	0	0	0	0	0	0	0	0	0	-	-	-	-	-	-	-	-	-	-
471	1	1	1	1	1	1	1	1	1	1	2	LAWA0D10748g	KLTH0G03212g	LAME0D03620g	LAFA0D03048g	LACI0C06964g	LAFE0F15456g	LADA0G13696g	LANO0D03114g	LAMI0D11078g	SAKL0G04334g	YOR156C,YDR409W	NFI1,SIZ1	SUMO E3 ligase, catalyzes the covalent attachment of SUMO (Smt3p) to proteins | SUMO/Smt3 ligase that promotes the attachment of sumo (Smt3p	nucleus (x1) | cytoplasm (x2) | cytoskeleton (x2) | cell cortex (x1) | chromosome (x2)	ligase activity (x2)	protein modification by small protein conjugation or removal (x2) | chromosome segregation (x2)	-	0	0	0	0	0	0	0	0	0	0	-	-	-	-	-	-	-	-	-	-
472	1	1	1	1	1	1	1	1	1	1	2	LAWA0G09274g	KLTH0G09042g	LAME0D06150g	LAFA0F20604g	LACI0F17502g	LAFE0E12288g	LADA0E09670g	LANO0H07932g	LAMI0C08570g	SAKL0E09064g	YNL069C,YIL133C	RPL16B,RPL16A	Ribosomal 60S subunit protein L16B | Ribosomal 60S subunit protein L16A	cytoplasm (x2) | ribosome (x2)	RNA binding (x2) | structural molecule activity (x2) | structural constituent of ribosome (x2)	cytoplasmic translation (x2)	-	0	0	0	0	0	0	0	0	0	0	-	-	-	-	-	-	-	-	-	-
473	1	1	1	1	1	1	1	1	2	1	1	LAWA0D11100g	KLTH0G02860g	LAME0D03268g	LAFA0D02696g	LACI0C07316g	LAFE0F15808g	LADA0G14246g	LANO0D02740g	LAMI0D10726g,LAMI0B05952g	SAKL0G03982g	YDR400W	URH1	Uridine nucleosidase (uridine-cytidine N-ribohydrolase), cleaves N-glycosidic bonds in nucleosides	cytoplasm (x1) | nucleus (x1)	hydrolase activity, acting on glycosyl bonds (x1)	nucleobase-containing small molecule metabolic process (x1) | cofactor metabolic process (x1)	-	0	0	0	0	0	0	0	0	0	0	-	-	-	-	-	-	-	-	-	-
474	1	1	1	1	1	1	1	1	1	1	2	LAWA0D11760g	KLTH0G02222g	LAME0H19284g	LAFA0D02124g	LACI0C07866g	LAFE0F16358g	LADA0G14818g	LANO0D02168g	LAMI0F11474g	SAKL0F02398g	YGR141W,YPR157W	VPS62,TDA6	Vacuolar protein sorting (VPS) protein | Putative protein of unknown function	unknown (x2)	unknown (x2)	protein targeting (x1) | unknown (x1)	-	0	0	0	0	0	0	0	0	0	0	-	-	-	-	-	-	-	-	-	-
475	1	1	1	1	1	1	1	1	1	1	2	LAWA0D11782g	KLTH0G02200g	LAME0H19306g	LAFA0D02102g	LACI0C07888g	LAFE0F16380g	LADA0G14840g	LANO0D02146g	LAMI0F11496g	SAKL0F02376g	YGR142W,YPR158W	BTN2,CUR1	v-SNARE binding protein | Sorting factor, central regulator of spatial protein quality control	cytoplasm (x1) | nucleus (x2)	other (x2)	ion transport (x1) | endosomal transport (x1) | protein folding (x1) | amino acid transport (x2)	-	0	0	0	0	0	0	0	0	0	0	-	-	-	-	-	-	-	-	-	-
476	1	1	1	1	1	1	1	1	1	1	2	LAWA0D11892g	KLTH0G02112g	LAME0H19350g	LAFA0D02058g	LACI0C07932g	LAFE0F16424g	LADA0G14884g	LANO0D02080g	LAMI0F11562g	SAKL0F02310g	YPR159W,YGR143W	KRE6,SKN1	Type II integral membrane protein required for beta-1,6 glucan biosynthesis | Protein involved in sphingolipid biosynthesis	site of polarized growth (x1) | cytoplasm (x1) | endoplasmic reticulum (x1) | endomembrane system (x1) | cytoplasmic membrane-bounded vesicle (x2) | membrane (x1) | plasma membrane (x1)	hydrolase activity, acting on glycosyl bonds (x2)	cell wall organization or biogenesis (x2) | carbohydrate metabolic process (x2) | lipid metabolic process (x1)	-	0	0	0	0	0	0	0	0	0	0	-	-	-	-	-	-	-	-	-	-
477	1	1	1	1	1	1	1	1	1	1	2	LAWA0C07800g	KLTH0B06864g	LAME0F16952g	LAFA0F14422g	LACI0H07294g	LAFE0H03818g	LADA0E03224g	LANO0H03576g	LAMI0H00540g	SAKL0E12716g	YHR146W,YNL173C	CRP1,MDG1	Protein that binds to cruciform DNA structures | Plasma membrane protein	cytoplasm (x1) | nucleus (x1) | plasma membrane (x2) | membrane (x1)	DNA binding (x1) | unknown (x1)	response to chemical stimulus (x1) | signaling (x1) | conjugation (x1) | unknown (x1)	-	0	0	0	0	0	0	0	0	0	0	-	-	-	-	-	-	-	-	-	-
478	1	1	1	1	1	1	1	1	1	1	2	LAWA0D00430g	KLTH0D18062g	LAME0A04368g	LAFA0A04016g	LACI0G01552g	LAFE0A01354g	LADA0A07668g	LANO0B01398g	LAMI0G09208g	SAKL0G18062g	YML081W,YJR127C	TDA9,RSF2	DNA-binding protein, putative transcription factor | Zinc-finger protein	cytoplasm (x1) | nucleus (x2)	DNA binding (x2) | nucleic acid binding transcription factor activity (x1)	other (x1) | unknown (x1)	-	0	0	0	0	0	0	0	0	0	0	-	-	-	-	-	-	-	-	-	-
479	1	1	1	1	1	1	1	1	1	1	2	LAWA0A08438g	KLTH0G12254g	LAME0G07404g	LAFA0E04302g	LACI0H11474g	LAFE0H07976g	LADA0F02036g	LANO0C07756g	LAMI0H16930g	SAKL0H15488g	YLR131C,YDR146C	ACE2,SWI5	Transcription factor required for septum destruction after cytokinesis | Transcription factor that recruits Mediator and Swi/Snf complexes	cytoplasm (x2) | nucleus (x2)	protein binding transcription factor activity (x2) | DNA binding (x2) | nucleic acid binding transcription factor activity (x1)	mitotic cell cycle (x1) | organelle fission (x2) | regulation of DNA metabolic process (x1) | regulation of cell cycle (x1) | transcription from RNA polymerase II promoter (x1) | cytokinesis (x2)	-	0	0	0	0	0	0	0	0	0	0	-	-	-	-	-	-	-	-	-	-
480	1	1	1	1	1	1	1	1	1	1	2	LAWA0A06172g	KLTH0G14454g	LAME0G09516g	LAFA0E06392g	LACI0H13520g	LAFE0H10088g	LADA0F04082g	LANO0C05622g	LAMI0H14950g	SAKL0H17842g	YDR096W,YER169W	GIS1,RPH1	Histone demethylase and transcription factor | JmjC domain-containing histone demethylase	mitochondrion (x1) | cytoplasm (x1) | nucleus (x2)	DNA binding (x2) | oxidoreductase activity (x2) | nucleic acid binding transcription factor activity (x2)	histone modification (x2) | chromatin organization (x2) | response to starvation (x1) | transcription from RNA polymerase II promoter (x1) | lipid metabolic process (x2)	-	0	0	0	0	0	0	0	0	0	0	-	-	-	-	-	-	-	-	-	-
481	1	1	1	1	1	1	1	1	1	1	2	LAWA0F10792g	KLTH0E11330g	LAME0H09010g	LAFA0E11716g	LACI0G10836g	LAFE0G12706g	LADA0D05864g	LANO0E10132g	LAMI0H02168g	SAKL0H11440g	YDR253C,YPL038W	MET32,MET31	Zinc-finger DNA-binding transcription factor | Zinc-finger DNA-binding transcription factor	cytoplasm (x2) | nucleus (x2)	protein binding transcription factor activity (x2) | transcription factor binding (x2) | DNA binding (x2) | nucleic acid binding transcription factor activity (x1)	mitotic cell cycle (x2) | cellular amino acid metabolic process (x1) | regulation of cell cycle (x1) | transcription from RNA polymerase II promoter (x2)	-	0	0	0	0	0	0	0	0	0	0	-	-	-	-	-	-	-	-	-	-
482	1	1	1	1	1	1	1	1	1	1	2	LAWA0D12618g	KLTH0G01386g	LAME0H20032g	LAFA0D01288g	LACI0C08570g	LAFE0F17062g	LADA0G15544g	LANO0D01420g	LAMI0D02476g	SAKL0F01562g	YGL224C,YER037W	SDT1,PHM8	Pyrimidine nucleotidase | Lysophosphatidic acid (LPA) phosphatase	nucleus (x1) | cytoplasm (x1) | unknown (x1)	phosphatase activity (x2)	nucleobase-containing small molecule metabolic process (x1) | response to starvation (x1)	-	0	0	0	0	0	0	0	0	0	0	-	-	-	-	-	-	-	-	-	-
483	1	1	1	1	1	1	1	1	1	1	2	LAWA0B02234g	KLTH0E02398g	LAME0G18052g	LAFA0G17590g	LACI0F03312g	LAFE0D08262g	LADA0G01376g	LANO0B04522g	LAMI0B03950g	SAKL0G07304g	YOR033C,YDR263C	EXO1,DIN7	5'-3' exonuclease and flap-endonuclease | Mitochondrial nuclease functioning in DNA repair and replication	mitochondrion (x2) | cytoplasm (x1) | nucleus (x1)	nuclease activity (x2)	DNA repair (x1) | DNA recombination (x2) | response to DNA damage stimulus (x1) | meiotic cell cycle (x2) | telomere organization (x1)	-	0	0	0	0	0	0	0	0	0	0	-	-	-	-	-	-	-	-	-	-
484	1	1	1	1	1	1	1	1	1	1	2	LAWA0G10000g	KLTH0G09746g	LAME0D05512g	LAFA0E02388g	LACI0F16842g	LAFE0E11628g	LADA0E10330g	LANO0H07250g	LAMI0E04544g	SAKL0E08360g	YIL111W,YNL052W	COX5B,COX5A	Subunit Vb of cytochrome c oxidase | Subunit Va of cytochrome c oxidase	mitochondrion (x2) | cytoplasm (x2) | mitochondrial envelope (x2) | membrane (x2)	transmembrane transporter activity (x2) | oxidoreductase activity (x2)	generation of precursor metabolites and energy (x2) | cellular respiration (x2)	-	0	0	0	0	0	0	0	0	0	0	-	-	-	-	-	-	-	-	-	-
485	1	1	1	1	1	1	1	1	1	1	2	LAWA0D12816g	KLTH0G01166g	LAME0H20252g	LAFA0D01046g	LACI0C08790g	LAFE0F17304g	LADA0G15764g	LANO0D01200g	LAMI0D02234g	SAKL0F01342g	YGL228W,YFR039C	SHE10,Unknown name	Putative GPI-anchored protein of unknown function | Putative protein of unknown function	unknown (x2)	unknown (x2)	unknown (x2)	-	0	0	0	0	0	0	0	0	0	0	-	-	-	-	-	-	-	-	-	-
486	1	1	1	1	1	1	1	1	1	1	2	LAWA0D13630g	KLTH0G00440g	LAME0H21000g	LAFA0D00320g	LACI0C09538g	LAFE0F18074g	LADA0G16534g	LANO0D00430g	LAMI0D01486g	SAKL0F00462g	YGL253W,YFR053C	HXK2,HXK1	Hexokinase isoenzyme 2 | Hexokinase isoenzyme 1	mitochondrion (x2) | cytoplasm (x2) | nucleus (x1)	kinase activity (x2)	response to chemical stimulus (x2) | carbohydrate metabolic process (x2) | generation of precursor metabolites and energy (x2) | carbohydrate transport (x1)	-	0	0	0	0	0	0	0	0	0	0	-	-	-	-	-	-	-	-	-	-
487	1	1	1	1	1	1	1	1	1	1	2	LAWA0C01200g	KLTH0F01144g	LAME0G00980g	LAFA0G00980g	LACI0E12244g	LAFE0G01046g	LADA0H01002g	LANO0G01002g	LAMI0F01002g	SAKL0C01166g	YDR516C,YCL040W	EMI2,GLK1	Non-essential protein of unknown function | Glucokinase	cytoplasm (x2) | plasma membrane (x1) | membrane (x1)	kinase activity (x1) | unknown (x1)	sporulation (x1) | carbohydrate metabolic process (x1) | generation of precursor metabolites and energy (x1) | carbohydrate transport (x1) | transcription from RNA polymerase II promoter (x1)	-	0	0	0	0	0	0	0	0	0	0	-	-	-	-	-	-	-	-	-	-
488	1	1	1	1	1	1	1	1	1	1	1	LAWA0E09076g	KLTH0D09372g	LAME0H13124g	LAFA0C06216g	LACI0F13674g	LAFE0A03268g	LADA0C08658g	LANO0H13894g	LAMI0C09780g	SAKL0H08536g	YPL111W	CAR1	Arginase, responsible for arginine degradation, expression responds to both induction by arginine and nitrogen catabolite repression	cytoplasm (x1) | nucleus (x1) | site of polarized growth (x1)	hydrolase activity, acting on carbon-nitrogen (but not peptide) bonds (x1) | enzyme regulator activity (x1) | ion binding (x1)	cellular amino acid metabolic process (x1)	-	0	0	0	0	0	0	0	0	0	1	-	-	-	-	-	-	-	-	-	SAKL0C00132pg
489	1	1	1	1	2	1	1	1	1	1	1	LAWA0C09604g	KLTH0B04884g	LAME0C04456g	LAFA0B04126g	LACI0D00342g,LACI0H01904g	LAFE0B02058g	LADA0D08702g	LANO0E12970g	LAMI0D12178g	SAKL0F11858g	YER086W	ILV1	Threonine deaminase, catalyzes the first step in isoleucine biosynthesis	mitochondrion (x1) | cytoplasm (x1)	lyase activity (x1)	cellular amino acid metabolic process (x1)	-	0	0	0	0	0	0	0	0	0	0	-	-	-	-	-	-	-	-	-	-
490	1	1	1	1	1	1	2	1	1	1	1	LAWA0H09714g	KLTH0H11154g	LAME0F18954g	LAFA0C01640g	LACI0D09274g	LAFE0F08790g	LADA0E01046g,LADA0D02850g	LANO0H01574g	LAMI0H11034g	SAKL0D07414g	YBR260C	RGD1	GTPase-activating protein (RhoGAP) for Rho3p and Rho4p, possibly involved in control of actin cytoskeleton organization	cytoplasm (x1) | cytoskeleton (x1) | cellular bud (x1) | cell cortex (x1) | site of polarized growth (x1)	lipid binding (x1) | enzyme regulator activity (x1) | ion binding (x1)	response to osmotic stress (x1) | response to chemical stimulus (x1) | signaling (x1)	-	0	0	0	0	0	0	0	0	0	0	-	-	-	-	-	-	-	-	-	-
491	1	1	1	1	1	1	1	1	1	1	2	LAWA0B08724g	KLTH0F15598g	LAME0F10616g	LAFA0D06084g	LACI0H22430g	LAFE0F03730g	LADA0B03774g	LANO0H21924g	LAMI0E14180g	SAKL0G02926g	YOR127W,YDR379W	RGA1,RGA2	GTPase-activating protein for polarity-establishment protein Cdc42p | GTPase-activating protein for polarity-establishment protein Cdc42p	cytoplasm (x2) | cytoskeleton (x2) | cellular bud (x2) | cell cortex (x2) | site of polarized growth (x2)	enzyme regulator activity (x2)	response to chemical stimulus (x2) | cell budding (x2) | conjugation (x2) | invasive growth in response to glucose limitation (x2) | signaling (x2) | pseudohyphal growth (x2) | cytoskeleton organization (x2)	-	0	0	0	0	0	0	0	0	0	0	-	-	-	-	-	-	-	-	-	-
492	1	1	1	1	1	1	1	1	1	1	2	LAWA0B08306g	KLTH0F15092g	LAME0F10176g	LAFA0D06524g	LACI0H21990g	LAFE0F04192g	LADA0B04192g	LANO0H21484g	LAMI0H03862g	SAKL0G03476g	YOR134W,YDR389W	BAG7,SAC7	Rho GTPase activating protein (RhoGAP), stimulates the intrinsic GTPase activity of Rho1p, which plays a role in actin cytoskeleton organization and control of cell wall synthesis | GTPase activating protein (GAP) for Rho1p, involved in signaling to the actin cytoskeleton, null mutations suppress tor2 mutations and temperature sensitive mutations in actin	other (x2)	enzyme regulator activity (x2)	cytoskeleton organization (x1) | signaling (x2)	-	0	0	0	0	0	0	0	0	0	0	-	-	-	-	-	-	-	-	-	-
493	1	1	1	1	1	1	1	1	1	1	2	LAWA0A00672g	KLTH0C11396g	LAME0D10814g	LAFA0B07734g	LACI0E00760g	LAFE0E00694g	LADA0B10528g	LANO0A06876g	LAMI0B08064g	SAKL0E01012g	YOR003W,YEL060C	YSP3,PRB1	Putative precursor to the subtilisin-like protease III | Vacuolar proteinase B (yscB)	vacuole (x1) | cytoplasm (x1) | unknown (x1)	peptidase activity (x2)	response to starvation (x1) | sporulation (x1) | other (x1)	-	0	0	0	0	0	0	0	0	0	0	-	-	-	-	-	-	-	-	-	-
494	1	1	1	1	1	1	1	1	1	1	2	LAWA0G06656g	KLTH0D14652g	LAME0E07668g	LAFA0G11980g	LACI0G03752g	LAFE0E08086g	LADA0H13410g	LANO0G12046g	LAMI0A02168g	SAKL0G15686g	YLR399C,YDL070W	BDF1,BDF2	Protein involved in transcription initiation at TATA-containing promoters | Protein involved in transcription initiation	nucleus (x1) | chromosome (x2)	transcription factor binding (x2) | DNA binding (x2) | histone binding (x2)	DNA repair (x1) | chromatin organization (x2) | response to DNA damage stimulus (x2) | regulation of DNA metabolic process (x2) | regulation of organelle organization (x1)	-	0	0	0	0	0	0	0	0	0	0	-	-	-	-	-	-	-	-	-	-
495	1	1	1	1	1	1	1	1	1	1	2	LAWA0D07250g	KLTH0A03322g	LAME0A02674g	LAFA0A05688g	LACI0D01948g	LAFE0B05996g	LADA0A06062g	LANO0B03026g	LAMI0G12904g	SAKL0B04950g	YGR056W,YLR357W	RSC1,RSC2	Component of the RSC chromatin remodeling complex | Component of the RSC chromatin remodeling complex	nucleus (x2)	DNA binding (x2) | ATPase activity (x1)	sporulation (x1) | chromatin organization (x2) | chromosome segregation (x2) | DNA-dependent transcription, elongation (x2) | response to DNA damage stimulus (x1) | DNA repair (x2) | DNA recombination (x1) | transcription from RNA polymerase II promoter (x2)	-	0	0	0	0	0	0	0	0	0	0	-	-	-	-	-	-	-	-	-	-
496	1	1	1	1	1	1	1	1	1	1	2	LAWA0G14466g	KLTH0A04510g	LAME0F13740g	LAFA0B07030g	LACI0D00914g	LAFE0B04852g	LADA0D11364g	LANO0B06898g	LAMI0E10176g	SAKL0F08822g	YER067W,YIL057C	RGI1,RGI2	Protein of unknown function | Protein of unknown function	cytoplasm (x2) | nucleus (x1)	unknown (x2)	generation of precursor metabolites and energy (x2)	-	0	0	0	0	0	0	0	0	0	0	-	-	-	-	-	-	-	-	-	-
497	1	1	1	1	1	1	1	1	1	1	2	LAWA0G14422g	KLTH0A04444g	LAME0F13784g	LAFA0B07074g	LACI0D00958g	LAFE0B04940g	LADA0D11408g	LANO0B06986g	LAMI0G11914g	SAKL0F08734g	YIL056W,YER064C	VHR1,VHR2	Transcriptional activator | Non-essential nuclear protein	cytoplasm (x2) | nucleus (x2)	protein binding transcription factor activity (x1) | DNA binding (x1) | unknown (x1) | nucleic acid binding transcription factor activity (x1)	response to starvation (x1) | other (x1) | transcription from RNA polymerase II promoter (x1)	-	0	0	0	0	0	0	0	0	0	0	-	-	-	-	-	-	-	-	-	-
498	1	1	1	1	1	1	1	1	1	1	2	LAWA0G14268g	KLTH0A04268g	LAME0G18756g	LAFA0B07228g	LACI0D01090g	LAFE0B05094g	LADA0D11628g	LANO0B07162g	LAMI0G12068g	SAKL0F08602g	YER059W,YIL050W	PCL6,PCL7	Pho85p cyclin of the Pho80p subfamily | Pho85p cyclin of the Pho80p subfamily	other (x1) | nucleus (x1)	enzyme regulator activity (x2)	regulation of protein modification process (x2) | carbohydrate metabolic process (x2) | generation of precursor metabolites and energy (x1) | regulation of cell cycle (x1) | protein phosphorylation (x1)	-	0	0	0	0	0	0	0	0	0	0	-	-	-	-	-	-	-	-	-	-
499	1	1	1	1	1	1	1	1	1	1	2	LAWA0A09560g	KLTH0H03674g	LAME0B04698g	LAFA0G21110g	LACI0G21858g	LAFE0C04104g	LADA0G01772g	LANO0E03642g	LAMI0G09868g	SAKL0A03938g	YGL134W,YPL219W	PCL10,PCL8	Pho85p cyclin | Cyclin	other (x2)	enzyme regulator activity (x2)	regulation of protein modification process (x2) | carbohydrate metabolic process (x2) | generation of precursor metabolites and energy (x1) | regulation of cell cycle (x1) | protein phosphorylation (x1)	-	0	0	0	0	0	0	0	0	0	0	-	-	-	-	-	-	-	-	-	-
500	1	1	1	1	1	1	1	1	1	1	2	LAWA0G14202g	KLTH0A04202g	LAME0G18800g	LAFA0B07294g	LACI0D01156g	LAFE0B05160g	LADA0D11672g	LANO0B07206g	LAMI0G12134g	SAKL0F08536g	YIL052C,YER056C-A	RPL34B,RPL34A	Ribosomal 60S subunit protein L34B | Ribosomal 60S subunit protein L34A	cytoplasm (x2) | ribosome (x2)	structural molecule activity (x2) | structural constituent of ribosome (x2)	cytoplasmic translation (x2)	-	0	0	0	0	0	0	0	0	0	0	-	-	-	-	-	-	-	-	-	-
501	1	1	1	1	1	1	1	1	1	1	2	LAWA0D04720g	KLTH0E07942g	LAME0F01662g	LAFA0D10506g	LACI0F08812g	LAFE0D03026g	LADA0G04918g	LANO0F07228g	LAMI0D06150g	SAKL0H22066g	YPL036W,YGL008C	PMA2,PMA1	Plasma membrane H+-ATPase, isoform of Pma1p, involved in pumping protons out of the cell | Plasma membrane H+-ATPase, pumps protons out of the cell	mitochondrion (x2) | cytoplasm (x2) | plasma membrane (x2) | membrane (x2)	transmembrane transporter activity (x2) | ATPase activity (x2)	ion transport (x2) | transmembrane transport (x1)	-	0	0	0	0	0	0	0	0	0	0	-	-	-	-	-	-	-	-	-	-
502	1	1	1	1	1	1	1	1	1	1	2	LAWA0G08526g	KLTH0B07678g	LAME0F16160g	LAFA0F15214g	LACI0H06524g	LAFE0H03026g	LADA0G06986g	LANO0H04368g	LAMI0F14180g	SAKL0E13486g	YDL226C,YNL204C	GCS1,SPS18	ADP-ribosylation factor GTPase activating protein (ARF GAP) | Protein of unknown function, contains a putative zinc-binding domain	cytoplasm (x1) | cytoskeleton (x1) | unknown (x1)	unknown (x1) | cytoskeletal protein binding (x1) | enzyme regulator activity (x1)	cytoskeleton organization (x1) | sporulation (x1) | Golgi vesicle transport (x1)	-	0	0	0	0	0	0	0	0	0	0	-	-	-	-	-	-	-	-	-	-
503	1	1	1	1	1	1	1	1	1	1	2	LAWA0C06546g	KLTH0F06798g	LAME0G06216g	LAFA0G06348g	LACI0E06810g	LAFE0G06656g	LADA0E03488g	LANO0G06216g	LAMI0G15170g	SAKL0D00726g	YML125C,YML087C	PGA3,AIM33	Putative cytochrome b5 reductase, localized to the plasma membrane | Putative protein of unknown function, highly conserved across species	cytoplasm (x1) | unknown (x1) | plasma membrane (x1) | endoplasmic reticulum (x1) | membrane (x1)	unknown (x2)	other (x1) | unknown (x1)	-	0	0	0	0	0	0	0	0	0	0	-	-	-	-	-	-	-	-	-	-
504	1	1	1	1	1	1	1	1	1	1	2	LAWA0D07514g	KLTH0A03586g	LAME0A02432g	LAFA0A05930g	LACI0D01728g	LAFE0B05776g	LADA0A05820g	LANO0B03268g	LAMI0G12684g	SAKL0F07898g	YIL036W,YER045C	CST6,ACA1	Basic leucine zipper (bZIP) transcription factor, in ATF/CREB family | ATF/CREB family basic leucine zipper (bZIP) transcription factor	nucleus (x2)	DNA binding (x2) | nucleic acid binding transcription factor activity (x2)	response to chemical stimulus (x1) | transcription from RNA polymerase II promoter (x2)	-	0	0	0	0	0	0	0	0	0	0	-	-	-	-	-	-	-	-	-	-
505	1	1	1	1	1	1	1	1	1	1	2	LAWA0F10726g	KLTH0E11264g	LAME0H09054g	LAFA0E11760g	LACI0G10792g	LAFE0G12662g	LADA0D05908g	LANO0E10176g	LAMI0H02234g	SAKL0H11594g	YPL032C,YDR251W	SVL3,PAM1	Protein of unknown function | Essential protein of unknown function	cytoplasm (x2) | cellular bud (x1) | site of polarized growth (x2)	unknown (x2)	pseudohyphal growth (x1) | endocytosis (x1)	-	0	0	0	0	0	0	0	0	0	0	-	-	-	-	-	-	-	-	-	-
506	1	1	1	1	1	1	1	1	1	1	2	LAWA0D06920g	KLTH0A02992g	LAME0A03026g	LAFA0A05380g	LACI0D02256g	LAFE0B06304g	LADA0A06370g	LANO0B02718g	LAMI0G08614g	SAKL0B01958g	YFL018C,YPL017C	LPD1,IRC15	Dihydrolipoamide dehydrogenase | Microtubule associated protein	mitochondrion (x2) | cytoplasm (x1) | cytoskeleton (x1)	methyltransferase activity (x1) | cytoskeletal protein binding (x1) | oxidoreductase activity (x1)	mitotic cell cycle (x1) | cellular amino acid metabolic process (x1) | organelle fission (x1) | chromosome segregation (x1) | regulation of cell cycle (x1) | DNA recombination (x1) | cytoskeleton organization (x1)	-	0	0	0	0	0	0	0	0	0	0	-	-	-	-	-	-	-	-	-	-
507	1	1	1	1	1	1	1	1	1	2	1	LAWA0G10550g	KLTH0A02794g	LAME0A03202g	LAFA0A05204g	LACI0D02476g	LAFE0B06524g	LADA0A06546g	LANO0B02542g	LAMI0F12376g	SAKL0B02178g,SAKL0E13596g	YFL010C	WWM1	WW domain containing protein of unknown function	mitochondrion (x1) | cytoplasm (x1) | nucleus (x1)	unknown (x1)	unknown (x1)	-	0	0	0	0	0	0	0	0	0	0	-	-	-	-	-	-	-	-	-	-
508	1	1	1	1	1	1	1	1	1	1	2	LAWA0A09340g	KLTH0H03894g	LAME0B04478g	LAFA0G20868g	LACI0G21638g	LAFE0C04324g	LADA0H10418g	LANO0E03862g	LAMI0G10088g	SAKL0A04158g	YGL063W,YPL212C	PUS2,PUS1	Mitochondrial tRNA:pseudouridine synthase | tRNA:pseudouridine synthase	mitochondrion (x1) | cytoplasm (x1) | nucleus (x1)	isomerase activity (x2)	RNA modification (x2) | tRNA processing (x2)	-	0	0	0	0	0	0	0	0	0	0	-	-	-	-	-	-	-	-	-	-
509	1	1	1	1	1	1	1	1	1	2	1	LAWA0F06964g	KLTH0G16764g	LAME0B02982g	LAFA0C07910g	LACI0D03224g	LAFE0B07316g	LADA0F06392g	LANO0C03312g	LAMI0C01354g	SAKL0B03124g,SAKL0H08800g	YPR003C	Unknown name	Putative sulfate permease	cytoplasm (x1) | endoplasmic reticulum (x1) | membrane (x1)	unknown (x1)	unknown (x1)	-	0	0	0	0	0	0	0	0	0	0	-	-	-	-	-	-	-	-	-	-
510	1	1	1	1	1	1	1	1	1	1	2	LAWA0A07580g	KLTH0G13486g	LAME0G08592g	LAFA0E05468g	LACI0H12684g	LAFE0H09252g	LADA0F03158g	LANO0C06590g	LAMI0H15764g	SAKL0H16830g	YLR092W,YBR294W	SUL2,SUL1	High affinity sulfate permease | High affinity sulfate permease of the SulP anion transporter family	plasma membrane (x2) | membrane (x2)	transmembrane transporter activity (x2)	ion transport (x2) | transmembrane transport (x1)	-	0	0	0	0	0	0	0	0	0	0	-	-	-	-	-	-	-	-	-	-
511	1	1	1	1	1	1	1	1	1	2	1	LAWA0F07096g	KLTH0G16940g	LAME0B02872g	LAFA0C08020g	LACI0D03378g	LAFE0B07470g	LADA0F06502g	LANO0C03180g	LAMI0B03642g	SAKL0H18920g,SAKL0B03322g	YER145C	FTR1	High affinity iron permease	plasma membrane (x1) | membrane (x1)	transmembrane transporter activity (x1)	ion transport (x1) | cellular ion homeostasis (x1) | transmembrane transport (x1)	-	0	0	0	0	0	0	0	0	0	0	-	-	-	-	-	-	-	-	-	-
512	1	1	1	1	1	1	1	1	1	1	2	LAWA0H04104g	KLTH0G16984g	LAME0B02850g	LAFA0C08064g	LACI0D03400g	LAFE0B07492g	LADA0F06524g	LANO0C03158g	LAMI0B03598g	SAKL0B03344g	YPR008W,YGL166W	HAA1,CUP2	Transcriptional activator involved in adaptation to weak acid stress | Copper-binding transcription factor	cytoplasm (x1) | nucleus (x2)	DNA binding (x1) | ion binding (x1) | nucleic acid binding transcription factor activity (x2)	response to chemical stimulus (x2) | transcription from RNA polymerase II promoter (x2)	-	0	0	0	0	0	0	0	0	0	0	-	-	-	-	-	-	-	-	-	-
513	1	1	1	1	1	1	1	1	1	1	2	LAWA0H03862g	KLTH0G17226g	LAME0B02630g	LAFA0C08262g	LACI0D03620g	LAFE0B07712g	LADA0F06744g	LANO0C02894g	LAMI0B03334g	SAKL0B03608g	YLR332W,YGR023W	MID2,MTL1	O-glycosylated plasma membrane protein | Putative plasma membrane sensor	site of polarized growth (x2) | plasma membrane (x2) | membrane (x1)	unknown (x1) | signal transducer activity (x1)	response to chemical stimulus (x1) | response to osmotic stress (x2) | mRNA processing (x1) | conjugation (x1) | response to starvation (x1) | signaling (x2) | cell wall organization or biogenesis (x1) | peroxisome organization (x1) | response to oxidative stress (x1) | cell morphogenesis (x1)	-	0	0	0	0	0	0	0	0	0	0	-	-	-	-	-	-	-	-	-	-
514	1	1	1	1	1	1	1	1	1	2	1	LAWA0H03752g	KLTH0G17336g	LAME0B02542g	LAFA0C08372g	LACI0D03730g	LAFE0B07888g	LADA0F06832g	LANO0C02762g	LAMI0B03246g	SAKL0B04664g,SAKL0G16434g	YGR044C	RME1	Zinc finger protein involved in control of meiosis	cytoplasm (x1) | nucleus (x1)	DNA binding (x1) | nucleic acid binding transcription factor activity (x1)	mitotic cell cycle (x1) | regulation of cell cycle (x1) | invasive growth in response to glucose limitation (x1) | transcription from RNA polymerase II promoter (x1) | meiotic cell cycle (x1)	-	0	0	0	0	0	0	0	0	0	0	-	-	-	-	-	-	-	-	-	-
515	1	1	1	1	1	1	1	1	1	1	2	LAWA0H03708g	KLTH0G17380g	LAME0A06260g	LAFA0A02080g	LACI0D03774g	LAFE0B07932g	LADA0C10484g	LANO0D09186g	LAMI0B03202g	SAKL0B04642g	YLR354C,YGR043C	TAL1,NQM1	Transaldolase, enzyme in the non-oxidative pentose phosphate pathway | Transaldolase of unknown function	cytoplasm (x1) | nucleus (x2)	other (x2)	nucleobase-containing small molecule metabolic process (x1) | carbohydrate metabolic process (x1) | cofactor metabolic process (x1) | unknown (x1)	-	0	0	0	0	0	0	0	0	0	0	-	-	-	-	-	-	-	-	-	-
516	1	1	1	1	1	1	1	1	1	1	2	LAWA0H03642g	KLTH0G17468g	LAME0A06304g	LAFA0A02036g	LACI0D03862g	LAFE0B08020g	LADA0C10528g	LANO0D09230g	LAMI0B03136g	SAKL0B04532g	YLR353W,YGR041W	BUD8,BUD9	Protein involved in bud-site selection | Protein involved in bud-site selection	site of polarized growth (x2) | cellular bud (x2) | plasma membrane (x2) | membrane (x2)	unknown (x2)	pseudohyphal growth (x2) | cytokinesis (x1)	-	0	0	0	0	0	0	0	0	0	0	-	-	-	-	-	-	-	-	-	-
517	1	1	1	1	1	1	1	1	1	1	2	LAWA0H03554g	KLTH0G17556g	LAME0A06392g	LAFA0A01948g	LACI0D03950g	LAFE0B08108g	LADA0C10616g	LANO0D09318g	LAMI0B03048g	SAKL0B04356g	YGR038W,YLR350W	ORM1,ORM2	Protein of unknown function | Protein of unknown function	cytoplasm (x2) | membrane (x2) | endoplasmic reticulum (x2) | endomembrane system (x2)	unknown (x2)	response to chemical stimulus (x2) | lipid metabolic process (x2)	-	0	0	0	0	0	0	0	0	0	0	-	-	-	-	-	-	-	-	-	-
518	1	1	1	1	1	1	1	1	1	1	2	LAWA0H03422g	KLTH0G17666g	LAME0A06502g	LAFA0A01838g	LACI0D04060g	LAFE0B08218g	LADA0C10748g	LANO0D09428g	LAMI0B02938g	SAKL0B04246g	YGR034W,YLR344W	RPL26B,RPL26A	Ribosomal 60S subunit protein L26B | Ribosomal 60S subunit protein L26A	cytoplasm (x2) | ribosome (x2)	RNA binding (x2) | structural molecule activity (x2) | structural constituent of ribosome (x2)	cytoplasmic translation (x2)	-	0	0	0	0	0	0	0	0	0	0	-	-	-	-	-	-	-	-	-	-
519	1	1	1	1	1	1	1	1	1	1	2	LAWA0H03092g	KLTH0G18018g	LAME0A06788g	LAFA0A01530g	LACI0D04368g	LAFE0B08526g	LADA0C11034g	LANO0D09736g	LAMI0B02608g	SAKL0B03806g	YGR027C,YLR333C	RPS25A,RPS25B	Protein component of the small (40S) ribosomal subunit | Protein component of the small (40S) ribosomal subunit	cytoplasm (x2) | ribosome (x2)	structural molecule activity (x2) | structural constituent of ribosome (x2)	cytoplasmic translation (x2)	-	0	0	0	0	0	0	0	0	0	0	-	-	-	-	-	-	-	-	-	-
520	1	1	1	1	1	1	1	1	1	1	2	LAWA0H03026g	KLTH0G18172g	LAME0A06832g	LAFA0A01486g	LACI0D04412g	LAFE0B08570g	LADA0C11078g	LANO0D09802g	LAMI0G16512g	SAKL0B04730g	YLR356W,YGR049W	ATG33,SCM4	Mitochondrial mitophagy-specific protein | Mitochondrial outer membrane protein of unknown function	mitochondrion (x2) | cytoplasm (x2) | mitochondrial envelope (x1) | membrane (x2)	unknown (x2)	other (x1) | unknown (x1)	-	0	0	0	0	0	0	0	0	0	0	-	-	-	-	-	-	-	-	-	-
521	1	1	1	1	1	1	1	1	1	1	2	LAWA0F04632g	KLTH0C05456g	LAME0E03026g	LAFA0D04522g	LACI0D05688g	LAFE0B09890g	LADA0H06788g	LANO0F12640g	LAMI0F09054g	SAKL0F13640g	YBL106C,YPR032W	SRO77,SRO7	Protein with roles in exocytosis and cation homeostasis | Effector of Rab GTPase Sec4p	cytoplasm (x1) | plasma membrane (x2) | membrane (x2)	enzyme binding (x1) | unknown (x1)	Golgi vesicle transport (x2) | exocytosis (x2) | signaling (x1)	-	0	0	0	0	0	0	0	0	0	0	-	-	-	-	-	-	-	-	-	-
522	1	1	1	1	1	1	1	1	1	1	1	LAWA0F05490g	KLTH0C06314g	LAME0F11364g	LAFA0D05336g	LACI0D04874g	LAFE0B09076g	LADA0H09274g	LANO0F11694g	LAMI0D05138g	SAKL0F12826g	YBL082C	ALG3	Dolichol-P-Man dependent alpha(1-3) mannosyltransferase, involved in the synthesis of dolichol-linked oligosaccharide donor for N-linked glycosylation of proteins	cytoplasm (x1) | endoplasmic reticulum (x1) | membrane (x1)	transferase activity, transferring glycosyl groups (x1)	protein glycosylation (x1) | carbohydrate metabolic process (x1) | oligosaccharide metabolic process (x1) | lipid metabolic process (x1)	-	0	0	0	0	0	0	1	0	0	0	-	-	-	-	-	-	LADA0D03004g	-	-	-
523	1	1	1	1	1	1	1	1	1	1	2	LAWA0E07602g	KLTH0D07876g	LAME0G14554g	LAFA0F07272g	LACI0H18448g	LAFE0H15214g	LADA0G12684g	LANO0D04346g	LAMI0C10594g	SAKL0D13442g	YKL043W,YMR016C	PHD1,SOK2	Transcriptional activator that enhances pseudohyphal growth | Nuclear protein that negatively regulates pseudohyphal differentiation	nucleus (x2)	DNA binding (x2) | nucleic acid binding transcription factor activity (x2)	pseudohyphal growth (x2) | transcription from RNA polymerase II promoter (x1)	-	0	0	0	0	0	0	0	0	0	0	-	-	-	-	-	-	-	-	-	-
524	1	1	1	1	1	1	1	1	1	1	2	LAWA0A06766g	KLTH0G13882g	LAME0G08988g	LAFA0E05864g	LACI0H13080g	LAFE0H09648g	LADA0F03554g	LANO0C06150g	LAMI0H15368g	SAKL0H17248g	YLR083C,YDR107C	EMP70,TMN2	Protein with a role in cellular adhesion and filamentous growth | Protein with a role in cellular adhesion and filamentous growth	vacuole (x2) | cytoplasm (x2) | membrane (x2)	unknown (x2)	pseudohyphal growth (x2) | endosomal transport (x1) | invasive growth in response to glucose limitation (x2) | cellular ion homeostasis (x2)	-	0	0	0	0	0	0	0	0	0	0	-	-	-	-	-	-	-	-	-	-
525	1	1	1	1	1	1	1	1	1	1	2	LAWA0F10352g	KLTH0E10934g	LAME0H09384g	LAFA0E12090g	LACI0H08130g	LAFE0H04632g	LADA0D06238g	LANO0E10506g	LAMI0H05160g	SAKL0H11946g	YDR244W,YMR018W	PEX5,Unknown name	Peroxisomal membrane signal receptor for the C-terminal tripeptide signal sequence (PTS1) of peroxisomal matrix proteins, required for peroxisomal matrix protein import | Putative protein of unknown function with similarity to human PEX5Rp (peroxin protein 5 related protein)	cytoplasm (x1) | peroxisome (x1) | unknown (x1) | membrane (x1)	protein binding, bridging (x1) | unknown (x1)	peroxisome organization (x1) | protein targeting (x1) | transmembrane transport (x1) | protein complex biogenesis (x1) | unknown (x1)	-	0	0	0	0	0	0	0	0	0	0	-	-	-	-	-	-	-	-	-	-
526	1	1	1	1	1	1	1	1	1	1	2	LAWA0F05358g	KLTH0C06182g	LAME0F11496g	LAFA0D05204g	LACI0D05006g	LAFE0B09208g	LADA0H09406g	LANO0F11826g	LAMI0D05006g	SAKL0F12958g	YER114C,YBL085W	BOI2,BOI1	Protein implicated in polar growth, functionally redundant with Boi1p | Protein implicated in polar growth	cytoplasm (x2) | site of polarized growth (x1) | cellular bud (x1) | plasma membrane (x1) | membrane (x2)	lipid binding (x2) | ion binding (x2)	cytokinesis (x2) | cell budding (x2) | signaling (x2)	-	0	0	0	0	0	0	0	0	0	0	-	-	-	-	-	-	-	-	-	-
527	1	1	1	1	1	1	1	1	1	1	2	LAWA0F05248g	KLTH0C06072g	LAME0F11650g	LAFA0D05094g	LACI0D05116g	LAFE0B09318g	LADA0H09516g	LANO0F11936g	LAMI0D04896g	SAKL0F13068g	YER117W,YBL087C	RPL23B,RPL23A	Ribosomal 60S subunit protein L23B | Ribosomal 60S subunit protein L23A	cytoplasm (x2) | ribosome (x2)	structural molecule activity (x2) | structural constituent of ribosome (x2)	cytoplasmic translation (x2)	-	0	0	0	0	0	0	0	0	0	0	-	-	-	-	-	-	-	-	-	-
528	1	1	1	1	1	1	1	1	1	1	2	LAWA0F01574g	KLTH0C02486g	LAME0D04302g	LAFA0E03268g	LACI0D07690g	LAFE0C11870g	LADA0H18602g	LANO0F15544g	LAMI0G03092g	SAKL0D12826g	YKL203C,YJR066W	TOR2,TOR1	PIK-related protein kinase and rapamycin target | PIK-related protein kinase and rapamycin target	Golgi apparatus (x1) | cytoplasm (x2) | endomembrane system (x1) | vacuole (x2) | nucleus (x1) | membrane (x1) | mitochondrion (x2) | plasma membrane (x2)	kinase activity (x2)	mitotic cell cycle (x1) | endocytosis (x1) | regulation of cell cycle (x1) | response to DNA damage stimulus (x2) | regulation of transport (x2) | cell wall organization or biogenesis (x1) | cytoskeleton organization (x1) | transcription from RNA polymerase I promoter (x2) | signaling (x1)	-	0	0	0	0	0	0	0	0	0	0	-	-	-	-	-	-	-	-	-	-
529	1	1	1	1	1	1	1	1	1	1	2	LAWA0F05182g	KLTH0C06006g	LAME0F11716g	LAFA0D05028g	LACI0D05182g	LAFE0B09384g	LADA0H07338g	LANO0F12002g	LAMI0D04830g	SAKL0F13134g	YER119C,YBL089W	AVT6,AVT5	Vacuolar aspartate and glutamate exporter | Putative transporter	vacuole (x1) | cytoplasm (x2) | membrane (x1)	other (x1) | transmembrane transporter activity (x1)	ion transport (x1) | other (x1) | transmembrane transport (x1) | amino acid transport (x1)	-	0	0	0	0	0	0	0	0	0	0	-	-	-	-	-	-	-	-	-	-
530	1	1	1	1	1	1	1	1	1	1	2	LAWA0F05116g	KLTH0C05940g	LAME0F11782g	LAFA0D04962g	LACI0D05248g	LAFE0B09450g	LADA0H07272g	LANO0F12068g	LAMI0D04764g	SAKL0F13200g	YER120W,YBL091C-A	SCS2,SCS22	Integral ER membrane protein, regulates phospholipid metabolism | Protein involved in regulation of phospholipid metabolism	site of polarized growth (x1) | cytoplasm (x1) | unknown (x1) | endoplasmic reticulum (x1) | endomembrane system (x1) | nucleus (x1) | membrane (x1) | cellular bud (x1)	unknown (x1) | lipid binding (x1) | ion binding (x1)	protein targeting (x2) | organelle inheritance (x1) | nuclear transport (x1) | lipid metabolic process (x1) | regulation of transport (x1) | lipid transport (x1)	-	0	0	0	0	0	0	0	0	0	0	-	-	-	-	-	-	-	-	-	-
531	1	1	1	1	1	2	1	1	1	1	1	LAWA0F04962g	KLTH0C05786g	LAME0F11958g	LAFA0D04830g	LACI0D05380g	LAFE0B09582g,LAFE0C13300g	LADA0H07118g	LANO0F12222g	LAMI0A07096g	SAKL0F13332g	YBL098W	BNA4	Kynurenine 3-mono oxygenase, required for the de novo biosynthesis of NAD from tryptophan via kynurenine	mitochondrion (x1) | cytoplasm (x1) | mitochondrial envelope (x1) | membrane (x1)	oxidoreductase activity (x1)	nucleobase-containing small molecule metabolic process (x1) | cofactor metabolic process (x1)	-	0	0	0	0	0	0	0	0	0	0	-	-	-	-	-	-	-	-	-	-
532	1	1	1	1	1	1	1	1	1	2	1	LAWA0F04940g	KLTH0C05764g	LAME0F11980g	LAFA0D04808g	LACI0D05402g	LAFE0B09604g	LADA0H07096g	LANO0F12244g	LAMI0A07118g	SAKL0F13354g,SAKL0H21890g	YBL097W	BRN1	Subunit of the condensin complex	nucleus (x1) | chromosome (x1)	unknown (x1)	chromosome segregation (x1) | organelle fission (x1)	-	0	0	0	0	0	0	0	0	0	0	-	-	-	-	-	-	-	-	-	-
533	0	1	1	1	1	1	1	1	1	2	1	-	KLTH0E02376g	LAME0G18030g	LAFA0G17546g	LACI0F03290g	LAFE0D08284g	LADA0G01354g	LANO0B04500g	LAMI0B03972g	SAKL0G07282g,SAKL0B06534g	YOR032C	HMS1	Basic helix-loop-helix (bHLH) protein with similarity to myc-family transcription factors	unknown (x1)	nucleic acid binding transcription factor activity (x1)	pseudohyphal growth (x1)	-	1	0	0	0	0	0	0	0	0	0	LAWA0B02212g	-	-	-	-	-	-	-	-	-
534	1	1	1	1	1	1	1	1	1	1	2	LAWA0C07074g	KLTH0F07260g	LAME0G06634g	LAFA0G06788g	LACI0D06370g	LAFE0B10594g	LADA0H10968g	LANO0G06700g	LAMI0H03312g	SAKL0G09526g	YDR309C,YHR061C	GIC2,GIC1	Redundant rho-like GTPase Cdc42p effector | Protein involved in initiation of budding and cellular polarization	site of polarized growth (x2) | cytoplasm (x2) | cell cortex (x2) | nucleus (x2) | membrane (x1) | cytoskeleton (x1) | cellular bud (x1) | plasma membrane (x2)	lipid binding (x2) | enzyme binding (x2) | enzyme regulator activity (x1) | ion binding (x1)	mitotic cell cycle (x2) | cell budding (x2) | regulation of cell cycle (x2) | signaling (x2) | cytokinesis (x2) | organelle fission (x2)	-	0	0	0	0	0	0	0	0	0	0	-	-	-	-	-	-	-	-	-	-
535	1	1	1	1	1	1	1	1	1	1	2	LAWA0C06898g	KLTH0F07084g	LAME0G06458g	LAFA0G06612g	LACI0D06546g	LAFE0B10748g	LADA0E03774g	LANO0G06524g	LAMI0H03158g	SAKL0G09306g	YHR066W,YDR312W	SSF1,SSF2	Constituent of 66S pre-ribosomal particles | Protein required for ribosomal large subunit maturation	nucleolus (x2) | nucleus (x2)	RNA binding (x2) | rRNA binding (x2)	organelle assembly (x2) | ribosome assembly (x2) | conjugation (x2) | ribosomal large subunit biogenesis (x2)	-	0	0	0	0	0	0	0	0	0	0	-	-	-	-	-	-	-	-	-	-
536	1	1	1	1	1	1	1	1	1	1	2	LAWA0F02586g	KLTH0C03476g	LAME0D05182g	LAFA0E02058g	LACI0D06722g	LAFE0B10924g	LADA0H04896g	LANO0F14532g	LAMI0D08944g	SAKL0D11770g	YJR047C,YEL034W	ANB1,HYP2	Translation elongation factor eIF-5A | Translation elongation factor eIF-5A	mitochondrion (x2) | cytoplasm (x1) | ribosome (x2)	RNA binding (x2) | translation factor activity, nucleic acid binding (x2)	translational elongation (x2) | translational initiation (x2) | regulation of translation (x1)	-	0	0	0	0	0	0	0	0	0	0	-	-	-	-	-	-	-	-	-	-
537	1	1	1	1	1	1	1	1	1	1	2	LAWA0F02476g	KLTH0C03366g	LAME0D05094g	LAFA0E01970g	LACI0D06810g	LAFE0B11012g	LADA0H04808g	LANO0F14620g	LAMI0D08328g	SAKL0D11858g	YJR048W,YEL039C	CYC1,CYC7	Cytochrome c, isoform 1 | Cytochrome c isoform 2, expressed under hypoxic conditions	mitochondrion (x2) | cytoplasm (x2) | mitochondrial envelope (x2)	other (x2)	generation of precursor metabolites and energy (x2) | cellular respiration (x2)	-	0	0	0	0	0	0	0	0	0	0	-	-	-	-	-	-	-	-	-	-
538	1	1	1	1	1	1	1	1	1	1	2	LAWA0F02410g	KLTH0C03322g	LAME0D05050g	LAFA0E01926g	LACI0D06854g	LAFE0B11056g	LADA0H04742g	LANO0F14664g	LAMI0D08372g	SAKL0D11902g	YJR049C,YEL041W	UTR1,YEF1	ATP-NADH kinase | ATP-NADH kinase	nucleus (x1) | cytoplasm (x1) | unknown (x1)	kinase activity (x2)	nucleobase-containing small molecule metabolic process (x1) | cofactor metabolic process (x2) | cellular ion homeostasis (x2)	-	0	0	0	0	0	0	0	0	0	0	-	-	-	-	-	-	-	-	-	-
539	2	1	1	1	1	1	1	1	1	1	1	LAWA0F02344g,LAWA0E12222g	KLTH0C03256g	LAME0D04984g	LAFA0E01882g	LACI0D06920g	LAFE0B11122g	LADA0H04676g	LANO0F14730g	LAMI0D08416g	SAKL0D11968g	YJR050W	ISY1	Member of NineTeen Complex (NTC) that contains Prp19p and stabilizes U6 snRNA in catalytic forms of spliceosome containing U2, U5, and U6 snRNAs, interacts with Prp16p to modulate splicing fidelity	nucleus (x1)	other (x1)	RNA splicing (x1) | mRNA processing (x1)	-	0	0	0	0	0	0	0	0	0	0	-	-	-	-	-	-	-	-	-	-
540	1	1	1	1	1	1	1	1	1	1	2	LAWA0F02168g	KLTH0C03146g	LAME0D04896g	LAFA0E01794g	LACI0D07008g	LAFE0C11122g	LADA0H04544g	LANO0F14840g	LAMI0D08526g	SAKL0D12056g	YJR051W,YEL047C	OSM1,FRD1	Fumarate reductase, catalyzes the reduction of fumarate to succinate | Soluble fumarate reductase	mitochondrion (x2) | cytoplasm (x1) | ribosome (x2) | plasma membrane (x1) | membrane (x1)	oxidoreductase activity (x2)	response to chemical stimulus (x2)	-	0	0	0	0	0	0	0	0	0	0	-	-	-	-	-	-	-	-	-	-
541	1	1	1	1	1	1	1	1	1	1	2	LAWA0G12618g	KLTH0G07480g	LAME0D07580g	LAFA0F19196g	LACI0F11848g	LAFE0A05050g	LADA0E08240g	LANO0H09340g	LAMI0D02872g	SAKL0G11440g	YKL148C,YJL045W	SDH1,Unknown name	Flavoprotein subunit of succinate dehydrogenase | Minor succinate dehydrogenase isozyme	mitochondrion (x2) | cytoplasm (x1) | mitochondrial envelope (x1) | membrane (x2)	oxidoreductase activity (x1) | ion binding (x2)	generation of precursor metabolites and energy (x2) | cellular respiration (x2)	-	0	0	0	0	0	0	0	0	0	0	-	-	-	-	-	-	-	-	-	-
542	1	1	1	1	1	1	1	1	1	1	2	LAWA0F02036g	KLTH0C02970g	LAME0D04764g	LAFA0E01662g	LACI0D07162g	LAFE0C11320g	LADA0B02850g	LANO0F15016g	LAMI0D10330g	SAKL0D12276g	YJR054W,YML047C	KCH1,PRM6	Potassium transporter that mediates K+ influx | Potassium transporter that mediates K+ influx	site of polarized growth (x1) | cytoplasm (x1) | vacuole (x2) | membrane (x2) | cellular bud (x1) | plasma membrane (x1)	transmembrane transporter activity (x2)	ion transport (x2) | transmembrane transport (x2)	-	0	0	0	0	0	0	0	0	0	0	-	-	-	-	-	-	-	-	-	-
543	3	1	0	2	1	1	0	1	1	0	0	LAWA0E00100g,LAWA0E14884g,LAWA0E14906g	KLTH0D15180g	-	LAFA0F00496g,LAFA0F00562g	LACI0D07184g	LAFE0A06964g	-	LANO0D00342g	LAMI0A00188g	-	-	-	-	-	-	-	-	1	0	1	0	0	0	0	0	0	0	LAWA0G17986g	-	LAME0C09472g	-	-	-	-	-	-	-
544	1	1	1	1	1	1	1	1	1	2	1	LAWA0F01904g	KLTH0C02860g	LAME0D04654g	LAFA0E03620g	LACI0D07338g	LAFE0C11496g	LADA0B02740g	LANO0F15148g	LAMI0G03444g	SAKL0D12386g,SAKL0F03190g	YJR055W	HIT1	Protein of unknown function, required for growth at high temperature	cytoplasm (x1) | nucleus (x1)	unknown (x1)	unknown (x1)	-	0	0	0	0	0	0	0	0	0	0	-	-	-	-	-	-	-	-	-	-
545	1	1	1	1	1	1	1	1	1	1	2	LAWA0G08724g	KLTH0B07480g	LAME0F16336g	LAFA0F15038g	LACI0H06700g	LAFE0H03224g	LADA0E06480g	LANO0H04192g	LAMI0F13982g	SAKL0E13288g	YDL222C,YNL194C	FMP45,Unknown name	Integral membrane protein localized to mitochondria | Integral membrane protein	cytoplasm (x2) | cell cortex (x2) | endoplasmic reticulum (x1) | membrane (x2) | mitochondrion (x1) | plasma membrane (x2)	unknown (x2)	cell wall organization or biogenesis (x1) | sporulation (x2)	-	0	0	0	0	0	0	0	0	0	0	-	-	-	-	-	-	-	-	-	-
546	1	1	1	1	1	1	2	1	1	1	1	LAWA0E11650g	KLTH0D12078g	LAME0H02630g	LAFA0B04874g	LACI0G06172g	LAFE0G07844g	LADA0C06062g,LADA0D02828g	LANO0H16622g	LAMI0A04654g	SAKL0H05676g	YOR262W	GPN2	Putative GTPase with a role in biogenesis of RNA pol II and polIII	cytoplasm (x1)	ion binding (x1)	nuclear transport (x1) | chromosome segregation (x1) | organelle fission (x1)	-	0	0	0	0	0	0	0	0	0	0	-	-	-	-	-	-	-	-	-	-
547	1	1	1	1	1	1	1	1	1	1	1	LAWA0A00452g	KLTH0C11572g	LAME0D11034g	LAFA0B07910g	LACI0E00892g	LAFE0E00826g	LADA0B10682g	LANO0A07052g	LAMI0B08240g	SAKL0E00792g	YPL272C	Unknown name	Putative protein of unknown function	unknown (x1)	unknown (x1)	unknown (x1)	-	0	0	0	0	0	0	1	0	0	0	-	-	-	-	-	-	LADA0B10704g	-	-	-
548	1	1	1	1	1	1	1	1	1	1	2	LAWA0F01244g	KLTH0C02112g	LAME0D03950g	LAFA0E02916g	LACI0D08020g	LAFE0C12200g	LADA0H18976g	LANO0F15896g	LAMI0G02740g	SAKL0G15048g	YGR214W,YLR048W	RPS0A,RPS0B	Ribosomal 40S subunit protein S0A | Protein component of the small (40S) ribosomal subunit	cytoplasm (x2) | ribosome (x2)	structural molecule activity (x2) | structural constituent of ribosome (x2)	organelle assembly (x2) | ribosome assembly (x2) | nucleobase-containing compound transport (x2) | rRNA processing (x2) | cytoplasmic translation (x2) | nuclear transport (x2) | ribosomal small subunit biogenesis (x2)	-	0	0	0	0	0	0	0	0	0	0	-	-	-	-	-	-	-	-	-	-
549	0	1	1	1	1	1	1	1	1	1	2	-	KLTH0H04400g	LAME0B03994g	LAFA0G20362g	LACI0G21132g	LAFE0C04852g	LADA0G02652g	LANO0E04346g	LAMI0G10572g	SAKL0A04686g	YGL076C,YPL198W	RPL7A,RPL7B	Ribosomal 60S subunit protein L7A | Ribosomal 60S subunit protein L7B	cytoplasm (x2) | ribosome (x1) | nucleolus (x1) | nucleus (x2)	structural molecule activity (x2) | structural constituent of ribosome (x2)	cytoplasmic translation (x2)	-	1	0	0	0	0	0	0	0	0	0	LAWA0A08856g	-	-	-	-	-	-	-	-	-
550	0	1	1	1	1	1	1	1	1	1	1	-	KLTH0H11638g	LAME0E09450g	LAFA0G13762g	LACI0D08834g	LAFE0F09230g	LADA0H15258g	LANO0G13806g	LAMI0H10286g	SAKL0D07942g	YLR253W	Unknown name	Putative protein of unknown function	mitochondrion (x1) | cytoplasm (x1)	unknown (x1)	unknown (x1)	-	2	0	0	0	0	0	0	0	0	0	LAWA0H10132g,LAWA0H09340g	-	-	-	-	-	-	-	-	-
551	1	1	1	1	1	1	1	1	1	1	2	LAWA0H04984g	KLTH0H06182g	LAME0C07514g	LAFA0C03972g	LACI0G19306g	LAFE0C06656g	LADA0A03356g	LANO0F02256g	LAMI0F08592g	SAKL0A06688g	YGL119W,YBR230W-A	COQ8,Unknown name	Protein required for ubiquinone biosynthesis and respiratory growth | Putative protein of unknown function	mitochondrion (x1) | cytoplasm (x1) | unknown (x1) | mitochondrial envelope (x1) | membrane (x1)	unknown (x2)	generation of precursor metabolites and energy (x1) | cofactor metabolic process (x1) | cellular respiration (x1) | unknown (x1)	-	0	0	0	0	0	0	0	0	0	0	-	-	-	-	-	-	-	-	-	-
552	1	1	1	1	1	1	1	1	1	1	1	LAWA0H10088g	KLTH0H11594g	LAME0H02080g	LAFA0G07514g	LACI0D08900g	LAFE0F09186g	LADA0C00452g	LANO0G07426g	LAMI0H10308g	SAKL0F16698g	YGL159W	Unknown name	Putative protein of unknown function	unknown (x1)	unknown (x1)	unknown (x1)	-	0	0	0	0	0	0	0	0	0	1	-	-	-	-	-	-	-	-	-	SAKL0D07909pg
553	1	1	1	1	1	1	1	1	1	1	2	LAWA0H09934g	KLTH0H11418g	LAME0E09274g	LAFA0G13586g	LACI0D09054g	LAFE0F09032g	LADA0H15060g	LANO0G13652g	LAMI0H11232g	SAKL0D07678g	YLR258W,YFR015C	GSY2,GSY1	Glycogen synthase | Glycogen synthase	mitochondrion (x2) | cytoplasm (x1) | nucleus (x1)	transferase activity, transferring glycosyl groups (x2)	carbohydrate metabolic process (x2) | generation of precursor metabolites and energy (x2)	-	0	0	0	0	0	0	0	0	0	0	-	-	-	-	-	-	-	-	-	-
554	1	1	1	1	1	1	1	1	1	1	2	LAWA0H09890g	KLTH0H11330g	LAME0F19130g	LAFA0C01464g	LACI0D09098g	LAFE0F08966g	LADA0E00892g	LANO0H01398g	LAMI0H11188g	SAKL0D07612g	YFR013W,YOL017W	IOC3,ESC8	Subunit of the Isw1a complex | Protein involved in telomeric and mating-type locus silencing	nucleus (x2)	DNA binding (x1) | unknown (x1) | ATPase activity (x1)	chromatin organization (x1) | other (x1)	-	0	0	0	0	0	0	0	0	0	0	-	-	-	-	-	-	-	-	-	-
555	1	1	1	1	1	1	1	1	1	1	2	LAWA0H09472g	KLTH0H10890g	LAME0F18712g	LAFA0C01882g	LACI0D09538g	LAFE0F08526g	LADA0E01288g	LANO0H01816g	LAMI0H10792g	SAKL0D07128g	YJL065C,YBR278W	DLS1,DPB3	Subunit of ISW2/yCHRAC chromatin accessibility complex | Third-largest subunit of DNA polymerase II (DNA polymerase epsilon)	nucleus (x1) | chromosome (x2)	nucleotidyltransferase activity (x1) | DNA binding (x1) | unknown (x1)	DNA repair (x1) | DNA replication (x1) | other (x1) | chromatin organization (x1) | response to DNA damage stimulus (x1)	-	0	0	0	0	0	0	0	0	0	0	-	-	-	-	-	-	-	-	-	-
556	1	1	1	1	1	1	1	1	1	1	2	LAWA0H08966g	KLTH0H10604g	LAME0F18426g	LAFA0F12002g	LACI0D09824g	LAFE0F08240g	LADA0E01574g	LANO0H02124g	LAMI0H10506g	SAKL0D06842g	YBR270C,YJL058C	BIT2,BIT61	Subunit of TORC2 membrane-associated complex | Subunit of TORC2 membrane-associated complex	cytoplasm (x1) | unknown (x1) | plasma membrane (x1) | membrane (x1)	unknown (x2)	cell wall organization or biogenesis (x1) | cytoskeleton organization (x1) | signaling (x1) | unknown (x1)	-	0	0	0	0	0	0	0	0	0	0	-	-	-	-	-	-	-	-	-	-
557	1	1	1	1	1	1	1	1	1	1	2	LAWA0H08702g	KLTH0H10340g	LAME0H04192g	LAFA0E15940g	LACI0D10088g	LAFE0F07954g	LADA0H12750g	LANO0F06216g	LAMI0H11474g	SAKL0D06556g	YBR273C,YJL048C	UBX7,UBX6	UBX (ubiquitin regulatory X) domain-containing protein | UBX (ubiquitin regulatory X) domain-containing protein	cytoplasm (x1) | nucleus (x1) | endoplasmic reticulum (x1) | endomembrane system (x2)	unknown (x2)	sporulation (x2) | proteolysis involved in cellular protein catabolic process (x2)	-	0	0	0	0	0	0	0	0	0	0	-	-	-	-	-	-	-	-	-	-
558	1	1	1	1	1	1	1	1	1	1	2	LAWA0E05842g	KLTH0D05830g	LAME0G16292g	LAFA0F09010g	LACI0D10242g	LAFE0F07800g	LADA0G10924g	LANO0D06018g	LAMI0G03972g	SAKL0E02508g	YMR079W,YKL091C	SEC14,Unknown name	Phosphatidylinositol/phosphatidylcholine transfer protein | Putative phosphatidylinositol/phosphatidylcholine transfer protein	cytoplasm (x1) | membrane (x1) | nucleus (x1) | Golgi apparatus (x1) | endomembrane system (x1)	transmembrane transporter activity (x1) | lipid binding (x1) | ion binding (x1)	sporulation (x1) | vesicle organization (x1) | ion transport (x1) | Golgi vesicle transport (x1) | lipid metabolic process (x1) | unknown (x1) | lipid transport (x1)	-	0	0	0	0	0	0	0	0	0	0	-	-	-	-	-	-	-	-	-	-
559	1	1	1	1	1	1	1	1	1	1	2	LAWA0E05776g	KLTH0D05764g	LAME0G16358g	LAFA0F09076g	LACI0D10308g	LAFE0F07734g	LADA0G10858g	LANO0D05952g	LAMI0G04038g	SAKL0E02574g	YMR081C,YKL093W	ISF1,MBR1	Serine-rich, hydrophilic protein | Protein involved in mitochondrial functions and stress response	unknown (x2)	unknown (x2)	generation of precursor metabolites and energy (x2) | cellular respiration (x2)	-	0	0	0	0	0	0	0	0	0	0	-	-	-	-	-	-	-	-	-	-
560	1	1	1	1	1	1	1	1	1	2	1	LAWA0E05754g	KLTH0D05742g	LAME0G16380g	LAFA0F09098g	LACI0D10330g	LAFE0F07712g	LADA0G10836g	LANO0D06172g	LAMI0G04060g	SAKL0E02596g,SAKL0E02662g	YKL094W	YJU3	Monoglyceride lipase (MGL), functional ortholog of mammalian MGL, localizes to lipid particles and membranes, also member of the eukaryotic serine hydrolase family	mitochondrion (x1) | cytoplasm (x1) | mitochondrial envelope (x1) | plasma membrane (x1) | membrane (x1)	other (x1)	lipid metabolic process (x1)	-	0	0	0	0	0	0	0	0	0	0	-	-	-	-	-	-	-	-	-	-
561	1	1	1	1	1	1	1	1	1	2	1	LAWA0E05732g	KLTH0D05720g	LAME0G16402g	LAFA0F09120g	LACI0D10352g	LAFE0F07690g	LADA0G10814g	LANO0D06194g	LAMI0G04082g	SAKL0E02684g,SAKL0E02618g	YKL095W	YJU2	Essential protein required for pre-mRNA splicing	nucleus (x1)	other (x1)	RNA splicing (x1) | mRNA processing (x1)	-	0	0	0	0	0	0	0	0	0	0	-	-	-	-	-	-	-	-	-	-
562	1	1	1	1	1	1	1	1	1	1	2	LAWA0E05534g	KLTH0D05500g	LAME0G16600g	LAFA0F09318g	LACI0D10550g	LAFE0F07448g	LADA0G10616g	LANO0D06392g	LAMI0G04280g	SAKL0E02926g	YMR086W,YKL105C	SEG1,SEG2	Component of eisosome required for proper eisosome assembly | Eisosome component	cytoplasm (x1) | ribosome (x1) | unknown (x1)	unknown (x2)	unknown (x2)	-	0	0	0	0	0	0	0	0	0	0	-	-	-	-	-	-	-	-	-	-
563	1	1	1	1	1	1	1	1	1	1	2	LAWA0E04830g	KLTH0D04796g	LAME0G17282g	LAFA0F10044g	LACI0D11232g	LAFE0H16116g	LADA0G09934g	LANO0D07184g	LAMI0G04984g	SAKL0E03630g	YMR105C,YKL127W	PGM2,PGM1	Phosphoglucomutase | Phosphoglucomutase, minor isoform	cytoplasm (x2)	isomerase activity (x2)	nucleobase-containing small molecule metabolic process (x2) | carbohydrate metabolic process (x1) | generation of precursor metabolites and energy (x2) | cellular ion homeostasis (x2) | oligosaccharide metabolic process (x2)	-	0	0	0	0	0	0	0	0	0	0	-	-	-	-	-	-	-	-	-	-
564	1	1	1	1	1	1	1	1	1	1	2	LAWA0G11408g	KLTH0A01804g	LAME0A04126g	LAFA0A04852g	LACI0D11452g	LAFE0H16380g	LADA0A07426g	LANO0B01684g	LAMI0F13256g	SAKL0C11792g	YBR037C,YBR024W	SCO1,SCO2	Copper-binding protein of mitochondrial inner membrane | Protein anchored to mitochondrial inner membrane	mitochondrion (x2) | cytoplasm (x1) | mitochondrial envelope (x2) | membrane (x2)	oxidoreductase activity (x1) | ion binding (x2)	ion transport (x2) | protein complex biogenesis (x1)	-	0	0	0	0	0	0	0	0	0	0	-	-	-	-	-	-	-	-	-	-
565	1	1	1	1	1	1	1	1	1	1	2	LAWA0G15280g	KLTH0A05346g	LAME0F14686g	LAFA0G18998g	LACI0H03840g	LAFE0B03950g	LADA0F11078g	LANO0B05996g	LAMI0E11056g	SAKL0F09856g	YDL179W,YDL127W	PCL9,PCL2	Cyclin | Cyclin, interacts with cyclin-dependent kinase Pho85p	cellular bud (x2) | nucleus (x1) | site of polarized growth (x2)	enzyme regulator activity (x2)	mitotic cell cycle (x1) | protein phosphorylation (x2) | regulation of cell cycle (x1) | transcription from RNA polymerase II promoter (x1) | cytoskeleton organization (x1) | regulation of protein modification process (x1)	-	0	0	0	0	0	0	0	0	0	0	-	-	-	-	-	-	-	-	-	-
566	1	1	1	1	1	1	1	1	1	1	2	LAWA0G11716g	KLTH0A01408g	LAME0F19394g	LAFA0C01200g	LACI0D11738g	LAFE0H16754g	LADA0E00606g	LANO0H01090g	LAMI0C07800g	SAKL0C12298g	YNL293W,YOL112W	MSB3,MSB4	Rab GTPase-activating protein | GTPase-activating protein of the Ras superfamily	site of polarized growth (x2) | cytoplasm (x2) | cell cortex (x2) | vacuole (x1) | membrane (x1) | cellular bud (x2) | plasma membrane (x1)	enzyme regulator activity (x2)	cytoskeleton organization (x2) | nucleobase-containing small molecule metabolic process (x1) | exocytosis (x2) | endocytosis (x1)	-	0	0	0	0	0	0	0	0	0	0	-	-	-	-	-	-	-	-	-	-
567	1	1	1	1	1	1	1	1	1	1	2	LAWA0A10594g	KLTH0H02640g	LAME0B05688g	LAFA0G22100g	LACI0G22914g	LAFE0C03026g	LADA0F13124g	LANO0E02630g	LAMI0C02300g	SAKL0A02816g	YPL249C,YMR192W	GYP5,GYL1	GTPase-activating protein (GAP) for yeast Rab family members | Putative GTPase activating protein (GAP) with a role in exocytosis	Golgi apparatus (x2) | site of polarized growth (x2) | cytoplasm (x2) | cytoplasmic membrane-bounded vesicle (x2) | membrane (x2) | mitochondrion (x1) | cellular bud (x2) | plasma membrane (x2)	other (x1) | enzyme regulator activity (x1)	Golgi vesicle transport (x2) | exocytosis (x1) | regulation of transport (x1)	-	0	0	0	0	0	0	0	0	0	0	-	-	-	-	-	-	-	-	-	-
568	1	1	1	1	1	1	1	1	1	1	2	LAWA0G11848g	KLTH0A01276g	LAME0F19526g	LAFA0C01068g	LACI0D11870g	LAFE0H16886g	LADA0C12200g	LANO0H00936g	LAMI0E04632g	SAKL0C12430g	YNL299W,YOL115W	TRF5,PAP2	Non-canonical poly(A) polymerase | Non-canonical poly(A) polymerase	nucleolus (x2) | nucleus (x2)	nucleotidyltransferase activity (x1) | lyase activity (x2)	RNA catabolic process (x1) | RNA modification (x2) | snoRNA processing (x1) | response to DNA damage stimulus (x1) | DNA repair (x2) | tRNA processing (x1)	-	0	0	0	0	0	0	0	0	0	0	-	-	-	-	-	-	-	-	-	-
569	1	1	1	1	1	1	1	1	1	1	2	LAWA0G11980g	KLTH0A01144g	LAME0F19636g	LAFA0C00936g	LACI0D11980g	LAFE0H17040g	LADA0C12310g	LANO0H00804g	LAMI0E04764g	SAKL0C12562g	YOL120C,YNL301C	RPL18A,RPL18B	Ribosomal 60S subunit protein L18A | Ribosomal 60S subunit protein L18B	cytoplasm (x2) | ribosome (x2)	structural molecule activity (x2) | structural constituent of ribosome (x2)	cytoplasmic translation (x2)	-	0	0	0	0	0	0	0	0	0	0	-	-	-	-	-	-	-	-	-	-
570	1	1	1	1	1	1	1	1	1	1	2	LAWA0G12002g	KLTH0A01122g	LAME0F19658g	LAFA0C00914g	LACI0D12002g	LAFE0H17062g	LADA0C12332g	LANO0H00782g	LAMI0E04786g	SAKL0C12584g	YNL302C,YOL121C	RPS19B,RPS19A	Protein component of the small (40S) ribosomal subunit, required for assembly and maturation of pre-40 S particles | Protein component of the small (40S) ribosomal subunit	cytoplasm (x2) | ribosome (x2)	structural molecule activity (x2) | structural constituent of ribosome (x2)	nuclear transport (x2) | nucleobase-containing compound transport (x2) | ribosomal small subunit biogenesis (x2) | cytoplasmic translation (x2)	-	0	0	0	0	0	0	0	0	0	0	-	-	-	-	-	-	-	-	-	-
571	1	1	1	1	1	1	1	1	1	1	2	LAWA0G12024g	KLTH0A01078g	LAME0F19680g	LAFA0C00892g	LACI0D12024g	LAFE0H17084g	LADA0C12354g	LANO0H00738g	LAMI0E04808g	SAKL0F15796g	YPR170W-B,YPR169W-A	Unknown name,Unknown name	Putative protein of unknown function, conserved in fungi | Dubious open reading frame unlikely to encode a protein, based on available experimental and comparative sequence data	unknown (x2)	unknown (x2)	unknown (x2)	YPR169W-A	0	0	0	0	0	0	0	0	0	0	-	-	-	-	-	-	-	-	-	-
572	1	1	1	1	1	1	1	1	1	1	2	LAWA0G12090g	KLTH0A00990g	LAME0F19746g	LAFA0C00804g	LACI0D12112g	LAFE0H17172g	LADA0C12442g	LANO0H00650g	LAMI0E04874g	SAKL0F15862g	YPR172W,YLR456W	Unknown name,Unknown name	Putative pyridoxal 5'-phosphate synthase | Putative pyridoxal 5'-phosphate synthase	nucleus (x1) | cytoplasm (x1) | unknown (x1)	unknown (x2)	unknown (x2)	-	0	0	0	0	0	0	0	0	0	0	-	-	-	-	-	-	-	-	-	-
573	1	1	1	1	1	1	1	1	1	1	2	LAWA0G12134g	KLTH0A00946g	LAME0F19790g	LAFA0C00760g	LACI0D12156g	LAFE0H17216g	LADA0C12486g	LANO0H00606g	LAMI0E04918g	SAKL0F15906g	YLR457C,YPR174C	NBP1,Unknown name	Spindle pole body (SPB) component | Protein of unknown function	cytoplasm (x1) | microtubule organizing center (x2) | nucleus (x2) | membrane (x1) | cytoskeleton (x2) | endomembrane system (x2)	unknown (x1) | lipid binding (x1)	cytoskeleton organization (x1) | protein complex biogenesis (x1) | unknown (x1)	-	0	0	0	0	0	0	0	0	0	0	-	-	-	-	-	-	-	-	-	-
574	1	1	1	1	1	1	1	1	1	1	2	LAWA0G10088g	KLTH0G09834g	LAME0D05424g	LAFA0E02300g	LACI0F16754g	LAFE0E11540g	LADA0E10418g	LANO0H07162g	LAMI0E04456g	SAKL0E08272g	YIL109C,YNL049C	SEC24,SFB2	Component of the Sec23p-Sec24p heterodimer of the COPII vesicle coat, required for cargo selection during vesicle formation in ER to Golgi transport | Component of the Sec23p-Sfb2p heterodimer of the COPII vesicle coat, required for cargo selection during vesicle formation in ER to Golgi transport	cytoplasm (x2) | membrane (x2) | cytoplasmic membrane-bounded vesicle (x2) | endomembrane system (x2)	other (x2)	vesicle organization (x2) | Golgi vesicle transport (x2) | protein complex biogenesis (x2)	-	0	0	0	0	0	0	0	0	0	0	-	-	-	-	-	-	-	-	-	-
575	1	1	1	1	1	1	1	1	1	1	2	LAWA0B02036g	KLTH0E02178g	LAME0A01310g	LAFA0A07030g	LACI0F03114g	LAFE0D08438g	LADA0G01200g	LANO0B04368g	LAMI0B04104g	SAKL0G07084g	YOR027W,YCR060W	STI1,TAH1	Hsp90 cochaperone, interacts with the Ssa group of the cytosolic Hsp70 chaperones and activates Ssa1p ATPase activity | Component of the conserved R2TP complex (Rvb1-Rvb2-Tah1-Pih1)	cytoplasm (x2) | nucleus (x1)	RNA binding (x1) | other (x1) | enzyme regulator activity (x1) | mRNA binding (x1)	protein folding (x2)	-	0	0	0	0	0	0	0	0	0	0	-	-	-	-	-	-	-	-	-	-
576	1	1	1	1	1	1	1	1	1	1	2	LAWA0C09384g	KLTH0B05170g	LAME0H05468g	LAFA0E08240g	LACI0H20208g	LAFE0F05996g	LADA0D08482g	LANO0E12750g	LAMI0B01992g	SAKL0E10956g	YHR117W,YNL121C	TOM71,TOM70	Mitochondrial outer membrane protein | Component of the TOM (translocase of outer membrane) complex	mitochondrion (x2) | cytoplasm (x2) | mitochondrial envelope (x2) | membrane (x2)	transmembrane transporter activity (x2) | protein transporter activity (x1)	protein targeting (x2) | mitochondrion organization (x2) | transmembrane transport (x1)	-	0	0	0	0	0	0	0	0	0	0	-	-	-	-	-	-	-	-	-	-
577	1	1	1	1	1	1	1	1	1	0	2	LAWA0A00826g	KLTH0C11242g	LAME0D10638g	LAFA0F01948g	LACI0E00606g	LAFE0E00540g	LADA0B10396g	LANO0A06722g	LAMI0B07910g	-	YML002W,YML003W	Unknown name,Unknown name	Putative protein of unknown function | Putative protein of unknown function	unknown (x2)	unknown (x2)	unknown (x2)	-	0	0	0	0	0	0	0	0	0	1	-	-	-	-	-	-	-	-	-	SAKL0E01177pg
578	1	1	1	1	1	1	1	1	1	1	2	LAWA0G09824g	KLTH0G09570g	LAME0D05688g	LAFA0F21088g	LACI0F17018g	LAFE0E11804g	LADA0E10154g	LANO0H07426g	LAMI0C08064g	SAKL0E08536g	YNL058C,YIL117C	Unknown name,PRM5	Putative protein of unknown function | Pheromone-regulated protein, predicted to have 1 transmembrane segment	vacuole (x1) | cytoplasm (x1) | membrane (x1)	unknown (x2)	unknown (x2)	-	0	0	0	0	0	0	0	0	0	0	-	-	-	-	-	-	-	-	-	-
579	1	1	1	1	1	1	1	1	1	1	2	LAWA0B10726g	KLTH0F17688g	LAME0D01376g	LAFA0D16094g	LACI0H24410g	LAFE0F01574g	LADA0A01442g	LANO0H23882g	LAMI0H09868g	SAKL0G00814g	YOR069W,YKR078W	VPS5,Unknown name	Nexin-1 homolog | Cytoplasmic protein of unknown function	cytoplasm (x2) | membrane (x1) | endomembrane system (x1)	protein transporter activity (x2) | lipid binding (x2) | ion binding (x1)	endosomal transport (x1) | unknown (x1)	-	0	0	0	0	0	0	0	0	0	0	-	-	-	-	-	-	-	-	-	-
580	1	1	1	1	1	1	2	1	1	1	1	LAWA0A01464g	KLTH0C10604g	LAME0D10044g	LAFA0F02498g	LACI0E01464g	LAFE0E01420g	LADA0B09846g,LADA0D02784g	LANO0A06172g	LAMI0B07360g	SAKL0E01958g	YOL013C	HRD1	Ubiquitin-protein ligase	cytoplasm (x1) | membrane (x1) | endoplasmic reticulum (x1) | endomembrane system (x1)	ligase activity (x1)	cell wall organization or biogenesis (x1) | proteolysis involved in cellular protein catabolic process (x1)	-	0	0	0	0	0	0	0	0	0	0	-	-	-	-	-	-	-	-	-	-
581	1	1	1	1	1	1	1	1	1	1	2	LAWA0A01684g	KLTH0C10296g	LAME0D09824g	LAFA0F02718g	LACI0E01684g	LAFE0E01640g	LADA0B09626g	LANO0A05952g	LAMI0B07184g	SAKL0E02178g	YLR264W,YOR167C	RPS28B,RPS28A	Protein component of the small (40S) ribosomal subunit | Protein component of the small (40S) ribosomal subunit	cytoplasm (x2) | ribosome (x2)	structural molecule activity (x2) | structural constituent of ribosome (x2)	nuclear transport (x2) | nucleobase-containing compound transport (x2) | cytoplasmic translation (x2)	-	0	0	0	0	0	0	0	0	0	0	-	-	-	-	-	-	-	-	-	-
582	1	1	1	1	1	1	1	1	1	1	2	LAWA0A01926g	KLTH0C09944g	LAME0F06788g	LAFA0F03048g	LACI0E02300g	LAFE0E02080g	LADA0B09296g	LANO0A05578g	LAMI0B06788g	SAKL0C09856g	YOL092W,YBR147W	YPQ1,RTC2	Putative vacuolar membrane transporter for cationic amino acids | Putative vacuolar membrane transporter for cationic amino acids	mitochondrion (x2) | cytoplasm (x2) | vacuole (x1) | membrane (x2)	transmembrane transporter activity (x2)	ion transport (x2) | transmembrane transport (x2) | amino acid transport (x2)	-	0	0	0	0	0	0	0	0	0	0	-	-	-	-	-	-	-	-	-	-
583	1	1	1	1	1	1	1	1	1	1	2	LAWA0A02630g	KLTH0C09196g	LAME0F06150g	LAFA0F03774g	LACI0E02894g	LAFE0E02674g	LADA0B08394g	LANO0A04786g	LAMI0B06150g	SAKL0C09086g	YOL105C,YNL283C	WSC3,WSC2	Sensor-transducer of the stress-activated PKC1-MPK1 signaling pathway | Sensor-transducer of the stress-activated PKC1-MPK1 signaling pathway	cytoplasm (x1) | cellular bud (x1) | site of polarized growth (x2)	signal transducer activity (x2)	cell wall organization or biogenesis (x1) | peroxisome organization (x1) | response to heat (x2) | signaling (x2)	-	0	0	0	0	0	0	0	0	0	0	-	-	-	-	-	-	-	-	-	-
584	1	1	1	1	1	1	1	1	1	1	2	LAWA0C07756g	KLTH0B06908g	LAME0F16908g	LAFA0F14466g	LACI0H07250g	LAFE0H03774g	LADA0E03180g	LANO0H03620g	LAMI0H00496g	SAKL0E12760g	YNL176C,YDL211C	TDA7,Unknown name	Cell cycle-regulated gene of unknown function | Protein of unknown function	vacuole (x2) | cytoplasm (x2)	unknown (x2)	unknown (x2)	-	0	0	0	0	0	0	0	0	0	0	-	-	-	-	-	-	-	-	-	-
585	1	1	1	1	1	1	1	1	1	1	1	LAWA0A02872g	KLTH0C08910g	LAME0F05952g	LAFA0F03972g	LACI0E03070g	LAFE0E02872g	LADA0B08196g	LANO0A04588g	LAMI0B05864g	SAKL0C08822g	YBR029C	CDS1	Phosphatidate cytidylyltransferase (CDP-diglyceride synthetase)	cytoplasm (x1) | cytoplasmic membrane-bounded vesicle (x1) | endoplasmic reticulum (x1) | membrane (x1)	nucleotidyltransferase activity (x1)	cellular amino acid metabolic process (x1) | lipid metabolic process (x1)	-	0	0	0	0	0	0	0	0	1	0	-	-	-	-	-	-	-	-	LAMI0B08834g	-
586	1	1	1	1	1	1	1	1	1	1	2	LAWA0A03026g	KLTH0C08756g	LAME0F05776g	LAFA0F04148g	LACI0E03224g	LAFE0E03026g	LADA0B08020g	LANO0A04412g	LAMI0H19504g	SAKL0C08668g	YOL066C,YDL036C	RIB2,PUS9	Bifunctional DRAP deaminase tRNA:pseudouridine synthase | Mitochondrial tRNA:pseudouridine synthase	mitochondrion (x2) | cytoplasm (x1) | nucleus (x1)	hydrolase activity, acting on carbon-nitrogen (but not peptide) bonds (x1) | isomerase activity (x2)	vitamin metabolic process (x2) | RNA modification (x2) | tRNA processing (x1)	-	0	0	0	0	0	0	0	0	0	0	-	-	-	-	-	-	-	-	-	-
587	1	1	1	1	1	0	0	1	2	2	1	LAWA0C13630g	KLTH0H13552g	LAME0C00562g	LAFA0F22496g	LACI0E03334g	-	-	LANO0E16754g	LAMI0C11122g,LAMI0D00364g	SAKL0B00308g,SAKL0H00132g	YMR319C	FET4	Low-affinity Fe(II) transporter of the plasma membrane	plasma membrane (x1) | membrane (x1)	transmembrane transporter activity (x1)	ion transport (x1) | transmembrane transport (x1)	-	0	0	0	0	0	1	0	0	0	0	-	-	-	-	-	LAFE0E03158g	-	-	-	-
588	1	1	1	1	1	1	1	1	1	1	2	LAWA0A03532g	KLTH0B00902g	LAME0F05270g	LAFA0F04654g	LACI0E03840g	LAFE0E03642g	LADA0B07492g	LANO0A03906g	LAMI0B06304g	SAKL0D04378g	YOR390W,YPL279C	Unknown name,Unknown name	Putative protein of unknown function | Putative protein of unknown function	membrane (x2)	unknown (x2)	unknown (x2)	-	0	0	0	0	0	0	0	0	0	0	-	-	-	-	-	-	-	-	-	-
589	1	1	1	1	1	1	1	1	1	1	2	LAWA0A03708g	KLTH0C08096g	LAME0F05116g	LAFA0F04808g	LACI0E03994g	LAFE0E03796g	LADA0B07338g	LANO0A03752g	LAMI0H07866g	SAKL0D04092g	YBR042C,YDR018C	CST26,Unknown name	Putative transferase involved in phospholipid biosynthesis | Probable membrane protein with three predicted transmembrane domains	cytoplasm (x1) | membrane (x1)	transferase activity, transferring acyl groups (x2)	lipid metabolic process (x2)	-	0	0	0	0	0	0	0	0	0	0	-	-	-	-	-	-	-	-	-	-
590	1	1	1	1	1	1	1	1	1	1	2	LAWA0A03972g	KLTH0C07810g	LAME0F04896g	LAFA0F05050g	LACI0E04258g	LAFE0E04082g	LADA0B07140g	LANO0A03488g	LAMI0C05886g	SAKL0D03828g	YDR025W,YBR048W	RPS11A,RPS11B	Protein component of the small (40S) ribosomal subunit | Protein component of the small (40S) ribosomal subunit	cytoplasm (x2) | ribosome (x2)	structural molecule activity (x2) | structural constituent of ribosome (x2)	organelle assembly (x2) | rRNA processing (x2) | ribosomal small subunit biogenesis (x2) | cytoplasmic translation (x2) | ribosome assembly (x2)	-	0	0	0	0	0	0	0	0	0	0	-	-	-	-	-	-	-	-	-	-
591	1	1	1	1	1	1	1	1	1	1	2	LAWA0A03994g	KLTH0C07788g	LAME0F04874g	LAFA0F05072g	LACI0E04280g	LAFE0E04104g	LADA0B07118g	LANO0A03466g	LAMI0C05864g	SAKL0D03806g	YBR049C,YDR026C	REB1,NSI1	RNA polymerase I enhancer binding protein | RNA polymerase I termination factor	cytoplasm (x1) | ribosome (x1) | nucleolus (x1) | nucleus (x2) | chromosome (x1)	DNA binding (x2)	transcription from RNA polymerase II promoter (x2) | chromatin organization (x1) | transcription from RNA polymerase I promoter (x1) | DNA-dependent transcription, termination (x2) | regulation of organelle organization (x1)	-	0	0	0	0	0	0	0	0	0	0	-	-	-	-	-	-	-	-	-	-
592	1	1	1	1	1	1	1	1	1	1	2	LAWA0B10572g	KLTH0F17512g	LAME0D01508g	LAFA0D15962g	LACI0H24256g	LAFE0F01860g	LADA0A01618g	LANO0H23728g	LAMI0H09670g	SAKL0G00968g	YKR075C,YOR062C	Unknown name,Unknown name	Protein of unknown function | Protein of unknown function	cytoplasm (x2) | nucleus (x2)	unknown (x2)	unknown (x2)	-	0	0	0	0	0	0	0	0	0	0	-	-	-	-	-	-	-	-	-	-
593	0	1	1	1	1	1	1	1	1	1	2	-	KLTH0H07678g	LAME0C05974g	LAFA0C05578g	LACI0H14532g	LAFE0H11144g	LADA0A04962g	LANO0F03796g	LAMI0H12442g	SAKL0H18986g	YDR069C,YER144C	DOA4,UBP5	Ubiquitin isopeptidase | Putative ubiquitin-specific protease	mitochondrion (x1) | cytoplasm (x1) | cellular bud (x1) | site of polarized growth (x1)	peptidase activity (x2)	regulation of DNA metabolic process (x1) | DNA replication (x1) | proteolysis involved in cellular protein catabolic process (x2) | protein modification by small protein conjugation or removal (x1) | endocytosis (x1)	-	1	0	0	0	0	0	0	0	0	0	LAWA0H06414g	-	-	-	-	-	-	-	-	-
594	1	1	1	1	1	1	1	1	1	1	2	LAWA0F03928g	KLTH0C04752g	LAME0E02388g	LAFA0D03884g	LACI0E05380g	LAFE0E05358g	LADA0H06150g	LANO0F13344g	LAMI0G00540g	SAKL0D02442g	YMR253C,YPL264C	Unknown name,Unknown name	Putative protein of unknown function | Putative membrane protein of unknown function	cytoplasm (x1) | membrane (x2)	unknown (x2)	unknown (x2)	-	0	0	0	0	0	0	0	0	0	0	-	-	-	-	-	-	-	-	-	-
595	1	1	1	1	1	1	1	1	1	1	2	LAWA0F03686g	KLTH0C04488g	LAME0E02168g	LAFA0D03664g	LACI0E05600g	LAFE0E05622g	LADA0H05908g	LANO0F13564g	LAMI0A05248g	SAKL0D02156g	YMR261C,YML100W	TPS3,TSL1	Regulatory subunit of trehalose-6-phosphate synthase/phosphatase | Large subunit of trehalose 6-phosphate synthase/phosphatase complex	cytoplasm (x2)	transferase activity, transferring glycosyl groups (x2) | enzyme regulator activity (x2) | phosphatase activity (x2)	carbohydrate metabolic process (x2) | oligosaccharide metabolic process (x2)	-	0	0	0	0	0	0	0	0	0	0	-	-	-	-	-	-	-	-	-	-
596	1	1	1	1	1	1	1	1	1	1	2	LAWA0F03620g	KLTH0C04400g	LAME0E02102g	LAFA0D03598g	LACI0E05666g	LAFE0E05688g	LADA0H05842g	LANO0F13630g	LAMI0A05182g	SAKL0D02090g	YMR264W,YML101C	CUE1,CUE4	Ubiquitin-binding protein | Protein of unknown function	mitochondrion (x2) | cytoplasm (x1) | membrane (x2) | endoplasmic reticulum (x1) | endomembrane system (x1)	unknown (x1) | enzyme regulator activity (x1)	proteolysis involved in cellular protein catabolic process (x1) | unknown (x1)	-	0	0	0	0	0	0	0	0	0	0	-	-	-	-	-	-	-	-	-	-
597	1	1	1	1	1	1	1	1	1	1	2	LAWA0F03356g	KLTH0C04158g	LAME0E01816g	LAFA0D03356g	LACI0E05908g	LAFE0G07580g	LADA0H05600g	LANO0F13872g	LAMI0A04962g	SAKL0D01826g	YML106W,YMR271C	URA5,URA10	Major orotate phosphoribosyltransferase (OPRTase) isozyme | Minor orotate phosphoribosyltransferase (OPRTase) isozyme	cytoplasm (x2) | nucleus (x1)	transferase activity, transferring glycosyl groups (x2)	nucleobase-containing small molecule metabolic process (x2)	-	0	0	0	0	0	0	0	0	0	0	-	-	-	-	-	-	-	-	-	-
598	1	1	1	1	1	1	1	1	1	1	2	LAWA0F03246g	KLTH0C04048g	LAME0G13586g	LAFA0E21660g	LACI0E05996g	LAFE0G07492g	LADA0H05490g	LANO0F13960g	LAMI0G01706g	SAKL0D01716g	YML109W,YMR273C	ZDS2,ZDS1	Protein with a role in regulating Swe1p-dependent polarized growth | Protein with a role in regulating Swe1p-dependent polarized growth	site of polarized growth (x2) | cytoplasm (x2) | endomembrane system (x1) | nucleus (x1) | membrane (x2) | cellular bud (x2)	unknown (x1) | enzyme regulator activity (x1)	nuclear transport (x2) | mitotic cell cycle (x2) | nucleobase-containing compound transport (x1) | regulation of cell cycle (x1) | cytokinesis (x2)	-	0	0	0	0	0	0	0	0	0	0	-	-	-	-	-	-	-	-	-	-
599	1	1	1	1	0	1	1	1	1	1	2	LAWA0F02762g	KLTH0C03608g	LAME0D05292g	LAFA0E02168g	-	LAFE0G07008g	LADA0H05006g	LANO0F14422g	LAMI0G01200g	SAKL0D01166g	YMR285C,YML118W	NGL2,NGL3	Protein involved in 5.8S rRNA processing | 3'-5' exonuclease specific for poly-A RNAs	other (x1) | unknown (x1)	nuclease activity (x2)	rRNA processing (x1) | RNA catabolic process (x1)	-	0	0	0	0	1	0	0	0	0	0	-	-	-	-	LACI0E06502g	-	-	-	-	-
600	1	1	1	1	1	1	1	1	1	1	2	LAWA0C06590g	KLTH0F06842g	LAME0G06260g	LAFA0G06392g	LACI0E06766g	LAFE0G06700g	LADA0E03532g	LANO0G06260g	LAMI0G15214g	SAKL0D00792g	YML085C,YML124C	TUB1,TUB3	Alpha-tubulin | Alpha-tubulin	cytoplasm (x2) | cytoskeleton (x2) | nucleus (x2) | microtubule organizing center (x2)	structural molecule activity (x2)	chromosome segregation (x2) | organelle fission (x2) | conjugation (x2)	-	0	0	0	0	0	0	0	0	0	0	-	-	-	-	-	-	-	-	-	-
601	1	1	1	1	1	1	2	1	1	1	1	LAWA0C06568g	KLTH0F06820g	LAME0G06238g	LAFA0G06370g	LACI0E06788g	LAFE0G06678g	LADA0E03510g,LADA0D03026g	LANO0G06238g	LAMI0G15192g	SAKL0D00748g	YML086C	ALO1	D-Arabinono-1,4-lactone oxidase, catalyzes the final step in biosynthesis of dehydro-D-arabinono-1,4-lactone, which is protective against oxidative stress	mitochondrion (x1) | cytoplasm (x1) | mitochondrial envelope (x1) | membrane (x1)	oxidoreductase activity (x1)	response to chemical stimulus (x1) | response to oxidative stress (x1)	-	0	0	0	0	0	0	0	0	0	0	-	-	-	-	-	-	-	-	-	-
602	1	1	1	1	1	1	1	1	1	1	2	LAWA0C06414g	KLTH0F06688g	LAME0G06084g	LAFA0G06216g	LACI0E06964g	LAFE0G06524g	LADA0E03356g	LANO0G06084g	LAMI0G15038g	SAKL0C07590g	YOL056W,YDL021W	GPM3,GPM2	Homolog of Gpm1p phosphoglycerate mutase | Homolog of Gpm1p phosphoglycerate mutase	cytoplasm (x2)	isomerase activity (x2) | unknown (x2)	unknown (x2)	-	0	0	0	0	0	0	0	0	0	0	-	-	-	-	-	-	-	-	-	-
603	1	1	1	1	1	1	1	1	1	1	2	LAWA0C06348g	KLTH0F06622g	LAME0G05996g	LAFA0G06128g	LACI0E07030g	LAFE0G06436g	LADA0E06172g	LANO0G06018g	LAMI0G14950g	SAKL0C07502g	YDL022W,YOL059W	GPD1,GPD2	NAD-dependent glycerol-3-phosphate dehydrogenase | NAD-dependent glycerol 3-phosphate dehydrogenase	mitochondrion (x2) | cytoplasm (x1) | nucleus (x1) | peroxisome (x1)	oxidoreductase activity (x2)	response to osmotic stress (x1) | nucleobase-containing small molecule metabolic process (x2) | carbohydrate metabolic process (x2) | cofactor metabolic process (x1)	-	0	0	0	0	0	0	0	0	0	0	-	-	-	-	-	-	-	-	-	-
604	1	1	1	1	1	1	1	1	1	1	2	LAWA0C05622g	KLTH0F05896g	LAME0G05336g	LAFA0G05446g	LACI0E07734g	LAFE0G05710g	LADA0E05468g	LANO0G05358g	LAMI0G14224g	SAKL0C06622g	YJL129C,YKR050W	TRK1,TRK2	Component of the Trk1p-Trk2p potassium transport system | Component of the Trk1p-Trk2p potassium transport system	plasma membrane (x2) | membrane (x2)	transmembrane transporter activity (x2)	cellular ion homeostasis (x2)	-	0	0	0	0	0	0	0	0	0	0	-	-	-	-	-	-	-	-	-	-
605	1	1	1	1	1	1	1	1	1	1	1	LAWA0H07998g	KLTH0H09526g	LAME0H03510g	LAFA0E16688g	LACI0H16204g	LAFE0H12948g	LADA0H11914g	LANO0F05512g	LAMI0H14158g	SAKL0D05698g	YJL088W	ARG3	Ornithine carbamoyltransferase	cytoplasm (x1)	other (x1)	cellular amino acid metabolic process (x1)	-	0	0	1	0	0	0	0	0	0	0	-	-	LAME0F11892g	-	-	-	-	-	-	-
606	1	1	1	1	1	1	1	1	1	1	2	LAWA0C05490g	KLTH0F05742g	LAME0G05204g	LAFA0G05314g	LACI0E07954g	LAFE0G05490g	LADA0E05336g	LANO0G05226g	LAMI0G14070g	SAKL0C06468g	YJL134W,YKR053C	LCB3,YSR3	Long-chain base-1-phosphate phosphatase | Dihydrosphingosine 1-phosphate phosphatase	cytoplasm (x2) | endoplasmic reticulum (x2) | membrane (x2)	phosphatase activity (x2)	signaling (x2) | lipid metabolic process (x1)	-	0	0	0	0	0	0	0	0	0	0	-	-	-	-	-	-	-	-	-	-
607	1	1	1	1	1	1	1	1	1	1	2	LAWA0C05402g	KLTH0F05654g	LAME0G05116g	LAFA0G05226g	LACI0E08042g	LAFE0G05402g	LADA0E05248g	LANO0G05138g	LAMI0G14004g	SAKL0C06380g	YJL136C,YKR057W	RPS21B,RPS21A	Protein component of the small (40S) ribosomal subunit | Protein component of the small (40S) ribosomal subunit	cytoplasm (x2) | ribosome (x2)	structural molecule activity (x2) | structural constituent of ribosome (x2)	rRNA processing (x2) | ribosomal small subunit biogenesis (x2) | cytoplasmic translation (x2)	-	0	0	0	0	0	0	0	0	0	0	-	-	-	-	-	-	-	-	-	-
[truncated: 5,007 more rows]
