# Supplementary material for: Reconstruction of ancestral chromosome architecture and gene repertoire reveals principles of genome evolution in a model yeast genus
Source: HighWire-hosted journal article supplement (doi:10.1101/gr.204420.116), 2016-05-31
Supplement: Supplemental_Table_S13_to_S14.xlsx [file Supplemental_Table_S13_to_S14.xlsx]

## Sheet: Table S13
Ancestor	G1	G2	G3	G4	G5	G6	G7	G8	G9	G10	G11
A1	LAKL	LAME	ZYRO	-	-	-	-	-	-	-	-
A1	LAKL	LAFA	ZYRO	-	-	-	-	-	-	-	-
A1	LAKL	LADA	ZYRO	-	-	-	-	-	-	-	-
A1	LAKL	LANO	ZYRO	-	-	-	-	-	-	-	-
A1	LAKL	LAWA	ZYRO	-	-	-	-	-	-	-	-
A1	LAKL	LATH	ZYRO	-	-	-	-	-	-	-	-
A1	LAKL	LAMI	ZYRO	-	-	-	-	-	-	-	-
A1	LAKL	LAFE	ZYRO	-	-	-	-	-	-	-	-
A1	LAKL	LACI	ZYRO	-	-	-	-	-	-	-	-
A1	LAKL	ZYRO	LAME	LAFA	LADA	LANO	LAWA	LATH	LAMI	LAFE	LACI
A1	ZYRO	LAME	LAKL	-	-	-	-	-	-	-	-
A1	ZYRO	LAFA	LAKL	-	-	-	-	-	-	-	-
A1	ZYRO	LADA	LAKL	-	-	-	-	-	-	-	-
A1	ZYRO	LANO	LAKL	-	-	-	-	-	-	-	-
A1	ZYRO	LAWA	LAKL	-	-	-	-	-	-	-	-
A1	ZYRO	LATH	LAKL	-	-	-	-	-	-	-	-
A1	ZYRO	LAMI	LAKL	-	-	-	-	-	-	-	-
A1	ZYRO	LAFE	LAKL	-	-	-	-	-	-	-	-
A1	ZYRO	LACI	LAKL	-	-	-	-	-	-	-	-
A2	LAME	LAFE	LAKL	ZYRO	-	-	-	-	-	-	-
A2	LAME	LACI	LAKL	ZYRO	-	-	-	-	-	-	-
A2	LAFA	LAFE	LAKL	ZYRO	-	-	-	-	-	-	-
A2	LAFA	LACI	LAKL	ZYRO	-	-	-	-	-	-	-
A2	LADA	LAFE	LAKL	ZYRO	-	-	-	-	-	-	-
A2	LADA	LACI	LAKL	ZYRO	-	-	-	-	-	-	-
A2	LANO	LAFE	LAKL	ZYRO	-	-	-	-	-	-	-
A2	LANO	LACI	LAKL	ZYRO	-	-	-	-	-	-	-
A2	LAWA	LAFE	LAKL	ZYRO	-	-	-	-	-	-	-
A2	LAWA	LACI	LAKL	ZYRO	-	-	-	-	-	-	-
A2	LATH	LAFE	LAKL	ZYRO	-	-	-	-	-	-	-
A2	LATH	LACI	LAKL	ZYRO	-	-	-	-	-	-	-
A2	LAMI	LAFE	LAKL	ZYRO	-	-	-	-	-	-	-
A2	LAMI	LACI	LAKL	ZYRO	-	-	-	-	-	-	-
A2	LAME	LAKL	LAFE	LACI	-	-	-	-	-	-	-
A2	LAME	ZYRO	LAFE	LACI	-	-	-	-	-	-	-
A2	LAFA	LAKL	LAFE	LACI	-	-	-	-	-	-	-
A2	LAFA	ZYRO	LAFE	LACI	-	-	-	-	-	-	-
A2	LADA	LAKL	LAFE	LACI	-	-	-	-	-	-	-
A2	LADA	ZYRO	LAFE	LACI	-	-	-	-	-	-	-
A2	LANO	LAKL	LAFE	LACI	-	-	-	-	-	-	-
A2	LANO	ZYRO	LAFE	LACI	-	-	-	-	-	-	-
A2	LAWA	LAKL	LAFE	LACI	-	-	-	-	-	-	-
A2	LAWA	ZYRO	LAFE	LACI	-	-	-	-	-	-	-
A2	LATH	LAKL	LAFE	LACI	-	-	-	-	-	-	-
A2	LATH	ZYRO	LAFE	LACI	-	-	-	-	-	-	-
A2	LAMI	LAKL	LAFE	LACI	-	-	-	-	-	-	-
A2	LAMI	ZYRO	LAFE	LACI	-	-	-	-	-	-	-
A2	LAKL	LAFE	LAME	LAFA	LADA	LANO	LAWA	LATH	LAMI	-	-
A2	LAKL	LACI	LAME	LAFA	LADA	LANO	LAWA	LATH	LAMI	-	-
A2	ZYRO	LAFE	LAME	LAFA	LADA	LANO	LAWA	LATH	LAMI	-	-
A2	ZYRO	LACI	LAME	LAFA	LADA	LANO	LAWA	LATH	LAMI	-	-
A3	LAFE	LACI	LAKL	LAME	LAFA	LADA	LANO	LAWA	LATH	LAMI	ZYRO
A3	LAFE	LAKL	LACI	-	-	-	-	-	-	-	-
A3	LAFE	LAME	LACI	-	-	-	-	-	-	-	-
A3	LAFE	LAFA	LACI	-	-	-	-	-	-	-	-
A3	LAFE	LADA	LACI	-	-	-	-	-	-	-	-
A3	LAFE	LANO	LACI	-	-	-	-	-	-	-	-
A3	LAFE	LAWA	LACI	-	-	-	-	-	-	-	-
A3	LAFE	LATH	LACI	-	-	-	-	-	-	-	-
A3	LAFE	LAMI	LACI	-	-	-	-	-	-	-	-
A3	LAFE	ZYRO	LACI	-	-	-	-	-	-	-	-
A3	LAKL	LACI	LAFE	-	-	-	-	-	-	-	-
A3	LAME	LACI	LAFE	-	-	-	-	-	-	-	-
A3	LAFA	LACI	LAFE	-	-	-	-	-	-	-	-
A3	LADA	LACI	LAFE	-	-	-	-	-	-	-	-
A3	LANO	LACI	LAFE	-	-	-	-	-	-	-	-
A3	LAWA	LACI	LAFE	-	-	-	-	-	-	-	-
A3	LATH	LACI	LAFE	-	-	-	-	-	-	-	-
A3	LAMI	LACI	LAFE	-	-	-	-	-	-	-	-
A3	ZYRO	LACI	LAFE	-	-	-	-	-	-	-	-
A4	LAME	LAMI	LAKL	LAFE	LACI	ZYRO	-	-	-	-	-
A4	LAFA	LAMI	LAKL	LAFE	LACI	ZYRO	-	-	-	-	-
A4	LADA	LAMI	LAKL	LAFE	LACI	ZYRO	-	-	-	-	-
A4	LANO	LAMI	LAKL	LAFE	LACI	ZYRO	-	-	-	-	-
A4	LAWA	LAMI	LAKL	LAFE	LACI	ZYRO	-	-	-	-	-
A4	LATH	LAMI	LAKL	LAFE	LACI	ZYRO	-	-	-	-	-
A4	LAME	LAKL	LAMI	-	-	-	-	-	-	-	-
A4	LAME	LAFE	LAMI	-	-	-	-	-	-	-	-
A4	LAME	LACI	LAMI	-	-	-	-	-	-	-	-
A4	LAME	ZYRO	LAMI	-	-	-	-	-	-	-	-
A4	LAFA	LAKL	LAMI	-	-	-	-	-	-	-	-
A4	LAFA	LAFE	LAMI	-	-	-	-	-	-	-	-
A4	LAFA	LACI	LAMI	-	-	-	-	-	-	-	-
A4	LAFA	ZYRO	LAMI	-	-	-	-	-	-	-	-
A4	LADA	LAKL	LAMI	-	-	-	-	-	-	-	-
A4	LADA	LAFE	LAMI	-	-	-	-	-	-	-	-
A4	LADA	LACI	LAMI	-	-	-	-	-	-	-	-
A4	LADA	ZYRO	LAMI	-	-	-	-	-	-	-	-
A4	LANO	LAKL	LAMI	-	-	-	-	-	-	-	-
A4	LANO	LAFE	LAMI	-	-	-	-	-	-	-	-
A4	LANO	LACI	LAMI	-	-	-	-	-	-	-	-
A4	LANO	ZYRO	LAMI	-	-	-	-	-	-	-	-
A4	LAWA	LAKL	LAMI	-	-	-	-	-	-	-	-
A4	LAWA	LAFE	LAMI	-	-	-	-	-	-	-	-
A4	LAWA	LACI	LAMI	-	-	-	-	-	-	-	-
A4	LAWA	ZYRO	LAMI	-	-	-	-	-	-	-	-
A4	LATH	LAKL	LAMI	-	-	-	-	-	-	-	-
A4	LATH	LAFE	LAMI	-	-	-	-	-	-	-	-
A4	LATH	LACI	LAMI	-	-	-	-	-	-	-	-
A4	LATH	ZYRO	LAMI	-	-	-	-	-	-	-	-
A4	LAKL	LAMI	LAME	LAFA	LADA	LANO	LAWA	LATH	-	-	-
A4	LAFE	LAMI	LAME	LAFA	LADA	LANO	LAWA	LATH	-	-	-
A4	LACI	LAMI	LAME	LAFA	LADA	LANO	LAWA	LATH	-	-	-
A4	ZYRO	LAMI	LAME	LAFA	LADA	LANO	LAWA	LATH	-	-	-
A5	LAME	LAWA	LAKL	LAMI	LAFE	LACI	ZYRO	-	-	-	-
A5	LAME	LATH	LAKL	LAMI	LAFE	LACI	ZYRO	-	-	-	-
A5	LAFA	LAWA	LAKL	LAMI	LAFE	LACI	ZYRO	-	-	-	-
A5	LAFA	LATH	LAKL	LAMI	LAFE	LACI	ZYRO	-	-	-	-
A5	LADA	LAWA	LAKL	LAMI	LAFE	LACI	ZYRO	-	-	-	-
A5	LADA	LATH	LAKL	LAMI	LAFE	LACI	ZYRO	-	-	-	-
A5	LANO	LAWA	LAKL	LAMI	LAFE	LACI	ZYRO	-	-	-	-
A5	LANO	LATH	LAKL	LAMI	LAFE	LACI	ZYRO	-	-	-	-
A5	LAME	LAKL	LAWA	LATH	-	-	-	-	-	-	-
A5	LAME	LAMI	LAWA	LATH	-	-	-	-	-	-	-
A5	LAME	LAFE	LAWA	LATH	-	-	-	-	-	-	-
A5	LAME	LACI	LAWA	LATH	-	-	-	-	-	-	-
A5	LAME	ZYRO	LAWA	LATH	-	-	-	-	-	-	-
A5	LAFA	LAKL	LAWA	LATH	-	-	-	-	-	-	-
A5	LAFA	LAMI	LAWA	LATH	-	-	-	-	-	-	-
A5	LAFA	LAFE	LAWA	LATH	-	-	-	-	-	-	-
A5	LAFA	LACI	LAWA	LATH	-	-	-	-	-	-	-
A5	LAFA	ZYRO	LAWA	LATH	-	-	-	-	-	-	-
A5	LADA	LAKL	LAWA	LATH	-	-	-	-	-	-	-
A5	LADA	LAMI	LAWA	LATH	-	-	-	-	-	-	-
A5	LADA	LAFE	LAWA	LATH	-	-	-	-	-	-	-
A5	LADA	LACI	LAWA	LATH	-	-	-	-	-	-	-
A5	LADA	ZYRO	LAWA	LATH	-	-	-	-	-	-	-
A5	LANO	LAKL	LAWA	LATH	-	-	-	-	-	-	-
A5	LANO	LAMI	LAWA	LATH	-	-	-	-	-	-	-
A5	LANO	LAFE	LAWA	LATH	-	-	-	-	-	-	-
A5	LANO	LACI	LAWA	LATH	-	-	-	-	-	-	-
A5	LANO	ZYRO	LAWA	LATH	-	-	-	-	-	-	-
A5	LAKL	LAWA	LAME	LAFA	LADA	LANO	-	-	-	-	-
A5	LAKL	LATH	LAME	LAFA	LADA	LANO	-	-	-	-	-
A5	LAMI	LAWA	LAME	LAFA	LADA	LANO	-	-	-	-	-
A5	LAMI	LATH	LAME	LAFA	LADA	LANO	-	-	-	-	-
A5	LAFE	LAWA	LAME	LAFA	LADA	LANO	-	-	-	-	-
A5	LAFE	LATH	LAME	LAFA	LADA	LANO	-	-	-	-	-
A5	LACI	LAWA	LAME	LAFA	LADA	LANO	-	-	-	-	-
A5	LACI	LATH	LAME	LAFA	LADA	LANO	-	-	-	-	-
A5	ZYRO	LAWA	LAME	LAFA	LADA	LANO	-	-	-	-	-
A5	ZYRO	LATH	LAME	LAFA	LADA	LANO	-	-	-	-	-
A6	LAWA	LATH	LAKL	LAME	LAFA	LADA	LANO	LAMI	LAFE	LACI	ZYRO
A6	LAWA	LAKL	LATH	-	-	-	-	-	-	-	-
A6	LAWA	LAME	LATH	-	-	-	-	-	-	-	-
A6	LAWA	LAFA	LATH	-	-	-	-	-	-	-	-
A6	LAWA	LADA	LATH	-	-	-	-	-	-	-	-
A6	LAWA	LANO	LATH	-	-	-	-	-	-	-	-
A6	LAWA	LAMI	LATH	-	-	-	-	-	-	-	-
A6	LAWA	LAFE	LATH	-	-	-	-	-	-	-	-
A6	LAWA	LACI	LATH	-	-	-	-	-	-	-	-
A6	LAWA	ZYRO	LATH	-	-	-	-	-	-	-	-
A6	LAKL	LATH	LAWA	-	-	-	-	-	-	-	-
A6	LAME	LATH	LAWA	-	-	-	-	-	-	-	-
A6	LAFA	LATH	LAWA	-	-	-	-	-	-	-	-
A6	LADA	LATH	LAWA	-	-	-	-	-	-	-	-
A6	LANO	LATH	LAWA	-	-	-	-	-	-	-	-
A6	LAMI	LATH	LAWA	-	-	-	-	-	-	-	-
A6	LAFE	LATH	LAWA	-	-	-	-	-	-	-	-
A6	LACI	LATH	LAWA	-	-	-	-	-	-	-	-
A6	ZYRO	LATH	LAWA	-	-	-	-	-	-	-	-
A7	LAME	LANO	LAKL	LAWA	LATH	LAMI	LAFE	LACI	ZYRO	-	-
A7	LAFA	LANO	LAKL	LAWA	LATH	LAMI	LAFE	LACI	ZYRO	-	-
A7	LADA	LANO	LAKL	LAWA	LATH	LAMI	LAFE	LACI	ZYRO	-	-
A7	LAME	LAKL	LANO	-	-	-	-	-	-	-	-
A7	LAME	LAWA	LANO	-	-	-	-	-	-	-	-
A7	LAME	LATH	LANO	-	-	-	-	-	-	-	-
A7	LAME	LAMI	LANO	-	-	-	-	-	-	-	-
A7	LAME	LAFE	LANO	-	-	-	-	-	-	-	-
A7	LAME	LACI	LANO	-	-	-	-	-	-	-	-
A7	LAME	ZYRO	LANO	-	-	-	-	-	-	-	-
A7	LAFA	LAKL	LANO	-	-	-	-	-	-	-	-
A7	LAFA	LAWA	LANO	-	-	-	-	-	-	-	-
A7	LAFA	LATH	LANO	-	-	-	-	-	-	-	-
A7	LAFA	LAMI	LANO	-	-	-	-	-	-	-	-
A7	LAFA	LAFE	LANO	-	-	-	-	-	-	-	-
A7	LAFA	LACI	LANO	-	-	-	-	-	-	-	-
A7	LAFA	ZYRO	LANO	-	-	-	-	-	-	-	-
A7	LADA	LAKL	LANO	-	-	-	-	-	-	-	-
A7	LADA	LAWA	LANO	-	-	-	-	-	-	-	-
A7	LADA	LATH	LANO	-	-	-	-	-	-	-	-
A7	LADA	LAMI	LANO	-	-	-	-	-	-	-	-
A7	LADA	LAFE	LANO	-	-	-	-	-	-	-	-
A7	LADA	LACI	LANO	-	-	-	-	-	-	-	-
A7	LADA	ZYRO	LANO	-	-	-	-	-	-	-	-
A7	LAKL	LANO	LAME	LAFA	LADA	-	-	-	-	-	-
A7	LAWA	LANO	LAME	LAFA	LADA	-	-	-	-	-	-
A7	LATH	LANO	LAME	LAFA	LADA	-	-	-	-	-	-
A7	LAMI	LANO	LAME	LAFA	LADA	-	-	-	-	-	-
A7	LAFE	LANO	LAME	LAFA	LADA	-	-	-	-	-	-
A7	LACI	LANO	LAME	LAFA	LADA	-	-	-	-	-	-
A7	ZYRO	LANO	LAME	LAFA	LADA	-	-	-	-	-	-
A8	LAME	LADA	LAKL	LANO	LAWA	LATH	LAMI	LAFE	LACI	ZYRO	-
A8	LAFA	LADA	LAKL	LANO	LAWA	LATH	LAMI	LAFE	LACI	ZYRO	-
A8	LAME	LAKL	LADA	-	-	-	-	-	-	-	-
A8	LAME	LANO	LADA	-	-	-	-	-	-	-	-
A8	LAME	LAWA	LADA	-	-	-	-	-	-	-	-
A8	LAME	LATH	LADA	-	-	-	-	-	-	-	-
A8	LAME	LAMI	LADA	-	-	-	-	-	-	-	-
A8	LAME	LAFE	LADA	-	-	-	-	-	-	-	-
A8	LAME	LACI	LADA	-	-	-	-	-	-	-	-
A8	LAME	ZYRO	LADA	-	-	-	-	-	-	-	-
A8	LAFA	LAKL	LADA	-	-	-	-	-	-	-	-
A8	LAFA	LANO	LADA	-	-	-	-	-	-	-	-
A8	LAFA	LAWA	LADA	-	-	-	-	-	-	-	-
A8	LAFA	LATH	LADA	-	-	-	-	-	-	-	-
A8	LAFA	LAMI	LADA	-	-	-	-	-	-	-	-
A8	LAFA	LAFE	LADA	-	-	-	-	-	-	-	-
A8	LAFA	LACI	LADA	-	-	-	-	-	-	-	-
A8	LAFA	ZYRO	LADA	-	-	-	-	-	-	-	-
A8	LAKL	LADA	LAME	LAFA	-	-	-	-	-	-	-
A8	LANO	LADA	LAME	LAFA	-	-	-	-	-	-	-
A8	LAWA	LADA	LAME	LAFA	-	-	-	-	-	-	-
A8	LATH	LADA	LAME	LAFA	-	-	-	-	-	-	-
A8	LAMI	LADA	LAME	LAFA	-	-	-	-	-	-	-
A8	LAFE	LADA	LAME	LAFA	-	-	-	-	-	-	-
A8	LACI	LADA	LAME	LAFA	-	-	-	-	-	-	-
A8	ZYRO	LADA	LAME	LAFA	-	-	-	-	-	-	-
A9	LAME	LAFA	LAKL	LADA	LANO	LAWA	LATH	LAMI	LAFE	LACI	ZYRO
A9	LAME	LAKL	LAFA	-	-	-	-	-	-	-	-
A9	LAME	LADA	LAFA	-	-	-	-	-	-	-	-
A9	LAME	LANO	LAFA	-	-	-	-	-	-	-	-
A9	LAME	LAWA	LAFA	-	-	-	-	-	-	-	-
A9	LAME	LATH	LAFA	-	-	-	-	-	-	-	-
A9	LAME	LAMI	LAFA	-	-	-	-	-	-	-	-
A9	LAME	LAFE	LAFA	-	-	-	-	-	-	-	-
A9	LAME	LACI	LAFA	-	-	-	-	-	-	-	-
A9	LAME	ZYRO	LAFA	-	-	-	-	-	-	-	-
A9	LAKL	LAFA	LAME	-	-	-	-	-	-	-	-
A9	LADA	LAFA	LAME	-	-	-	-	-	-	-	-
A9	LANO	LAFA	LAME	-	-	-	-	-	-	-	-
A9	LAWA	LAFA	LAME	-	-	-	-	-	-	-	-
A9	LATH	LAFA	LAME	-	-	-	-	-	-	-	-
A9	LAMI	LAFA	LAME	-	-	-	-	-	-	-	-
A9	LAFE	LAFA	LAME	-	-	-	-	-	-	-	-
A9	LACI	LAFA	LAME	-	-	-	-	-	-	-	-
A9	ZYRO	LAFA	LAME	-	-	-	-	-	-	-	-

## Sheet: Table S14
Ancestor name	G1	G2	G3..Gn	D	D'	sum genes	# chr
L.A1	LAKL	ZYRO	LACI, LADA, LAFA, LAFE, LAME, LAMI, LANO, LATH, LAWA	6	2	4446	8
L.A9	LAME	LANO	LAFA	4	4	4799	8
L.A8	LAME	LATH	LADA	4	4	4716	8
L.A7	LAME	LAMI	LANO	2	2	4524	8
L.A5	LAKL	LATH	LADA, LAFA, LAME, LANO	3	2	4673	8
L.A6	LANO	LATH	LAWA	6	4	4751	8
L.A4	LAKL	LAMI	LADA, LAFA, LAMI, LANO, LATH, LAWA	2	4	4604	9
L.A2	LAFE	LATH	LAKL, ZYRO	3	6	4716	8
L.A3	LACI	LANO	LAFE	1	2	4666	8
